# Supplementary material for: The Transcriptome and Methylome of the Developing and Aging Brain and Their Relations to Gliomas and Psychological Disorders
Source: MDPI journal article supplement (doi:10.3390/cells11030362), 2022-01-21

Hippo signaling pathway – multiple s

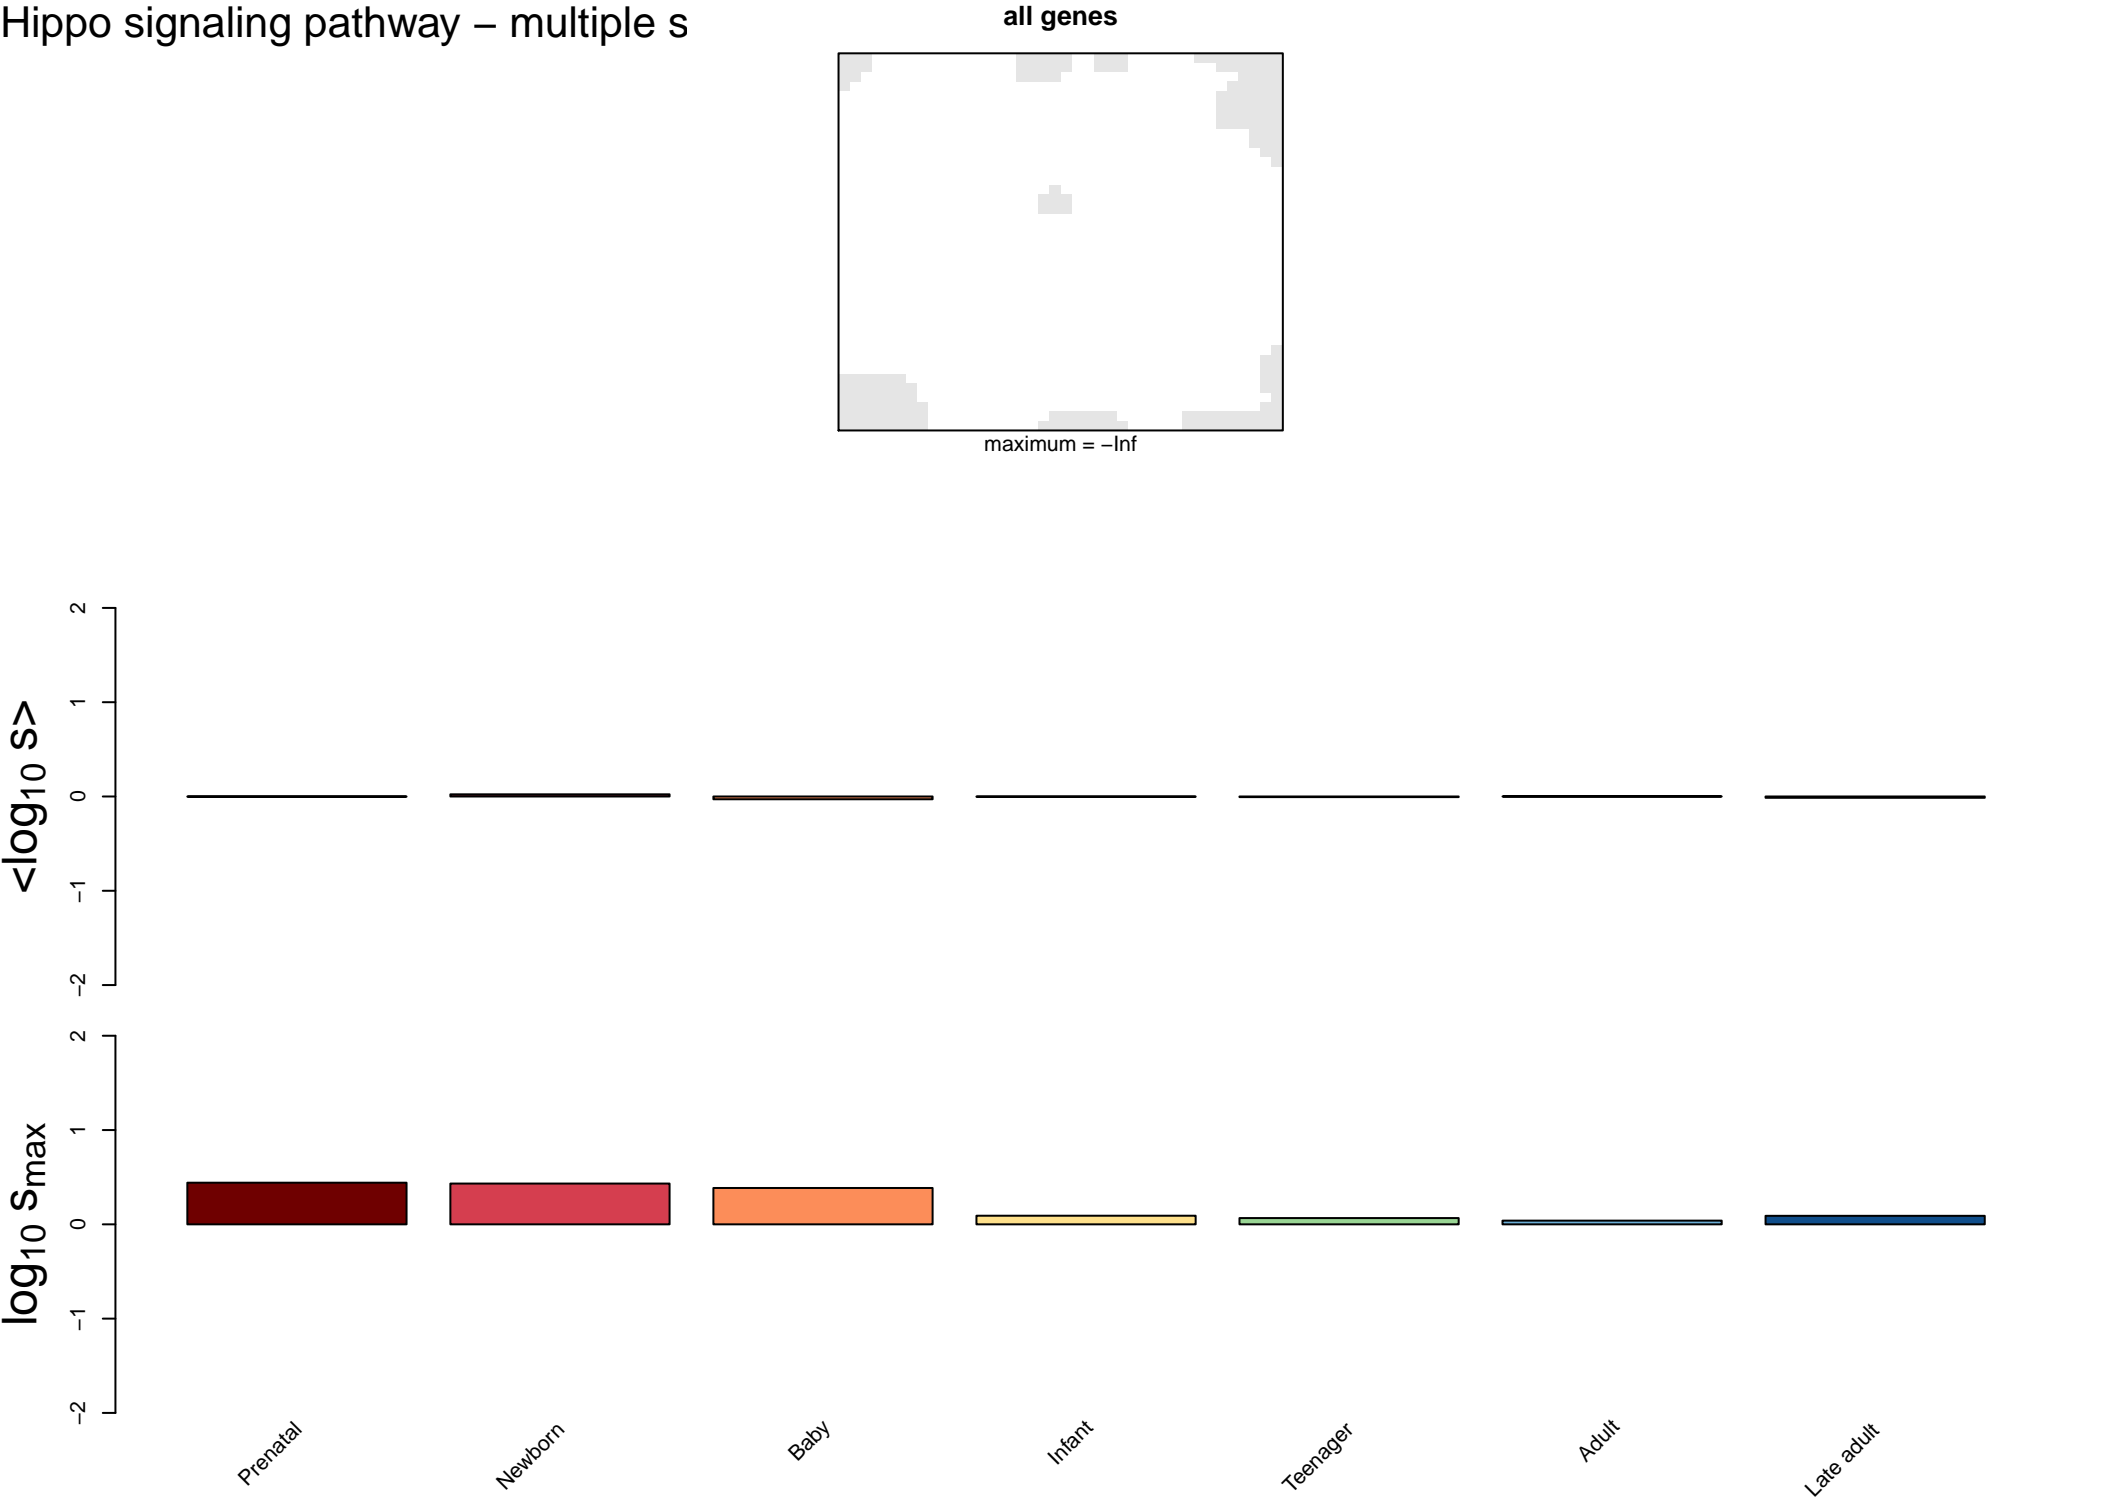

Hippo\_signaling\_pathway\_multiple\_species  
genes with data

**Mammals**

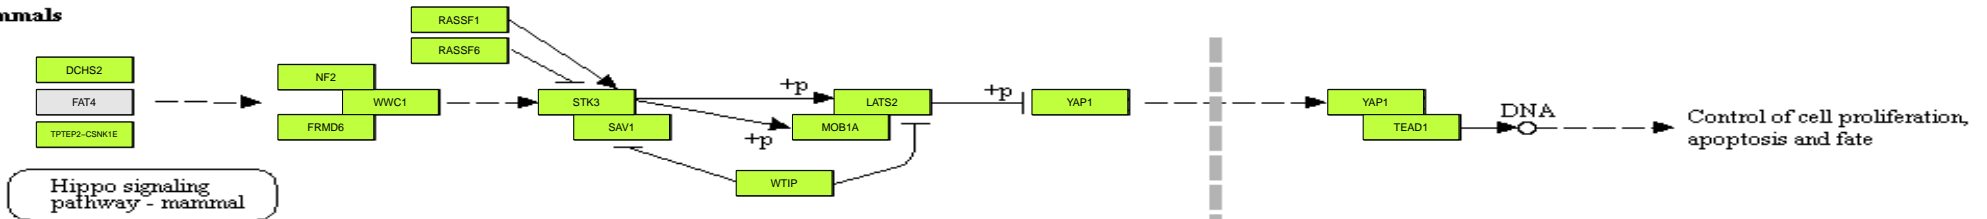

**Drosophila**

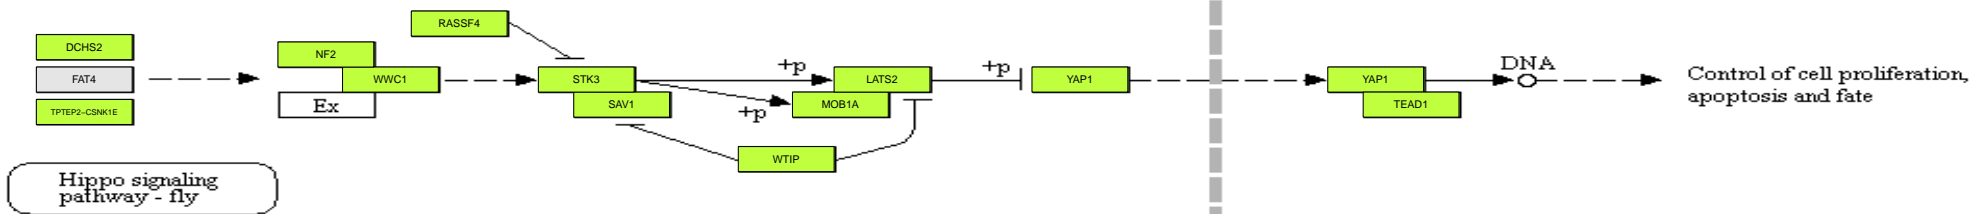

**C. elegans**

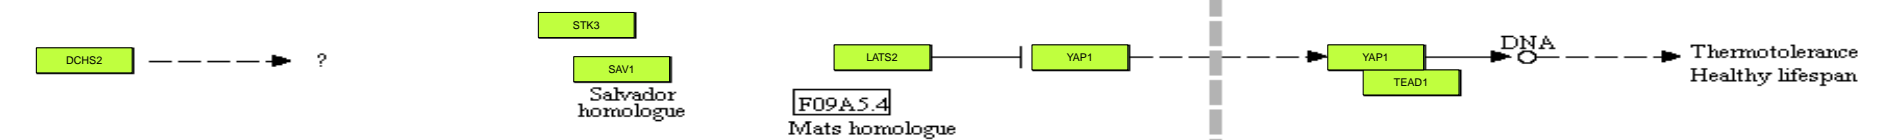

**S. cerevisiae**

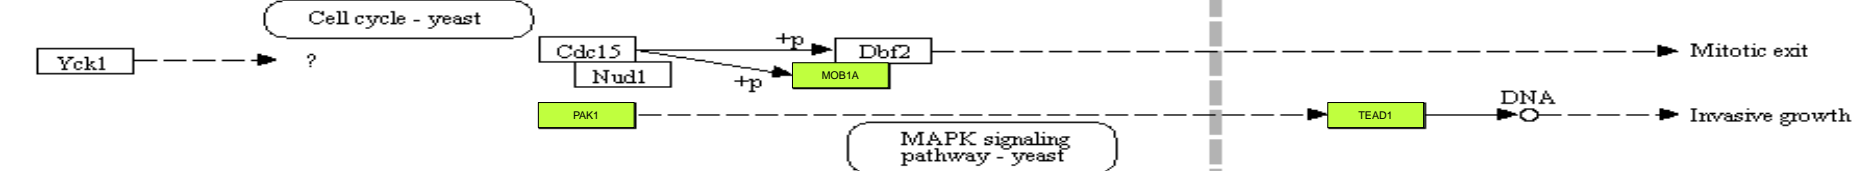

MAPK signaling  
pathway - yeast

Hippo\_signaling\_pathway\_multiple\_species  
sink nodes

**Mammals**

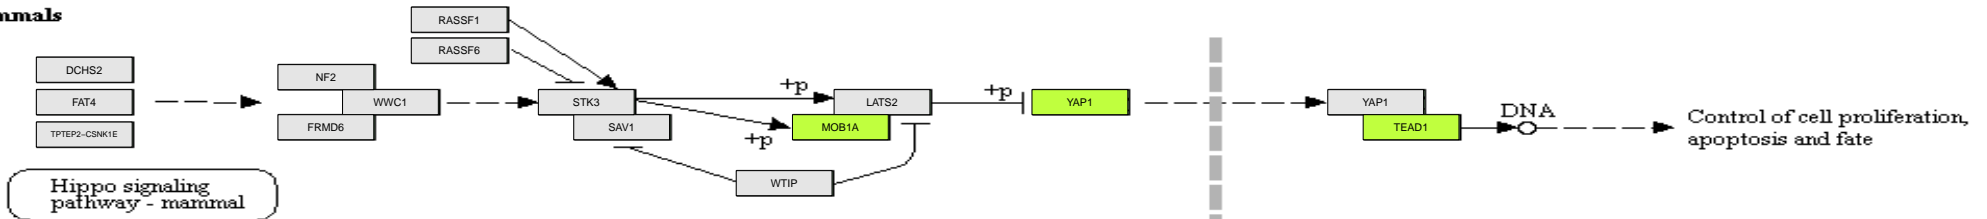

**Drosophila**

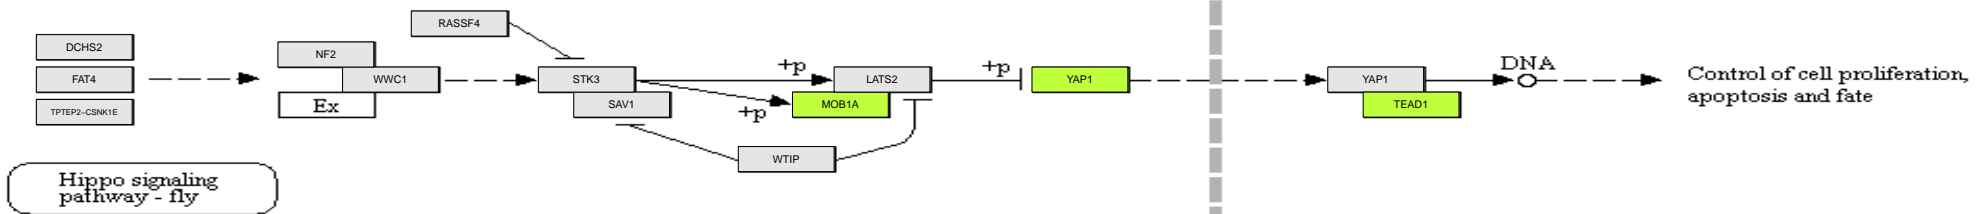

**C. elegans**

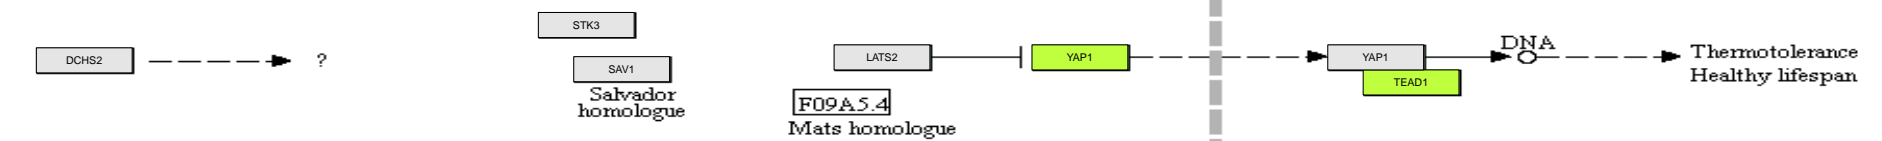

**S. cerevisiae**

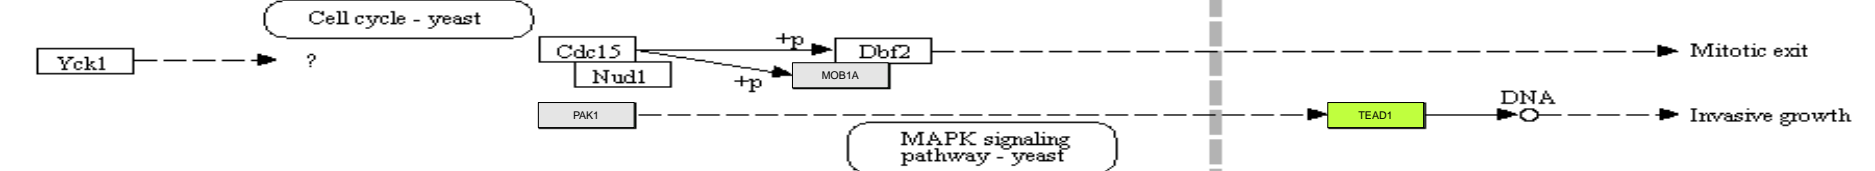

Hippo\_signaling\_pathway\_multiple\_species  
Prenatal

**Mammals**

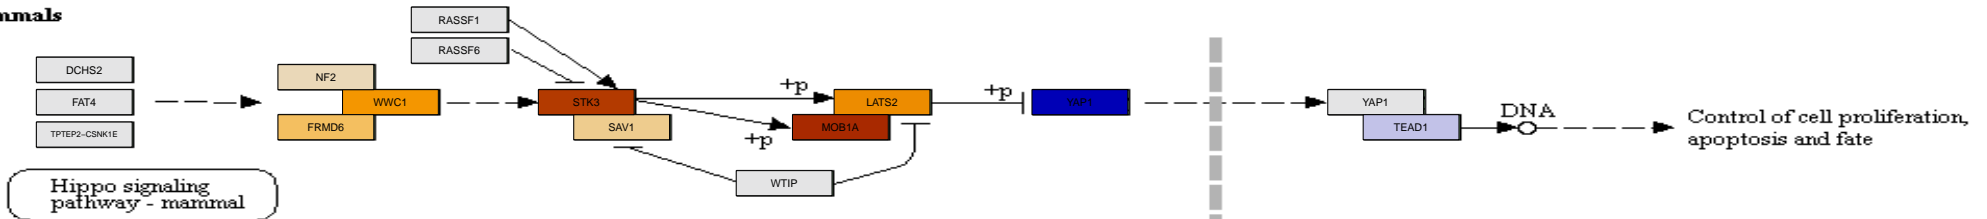

**Drosophila**

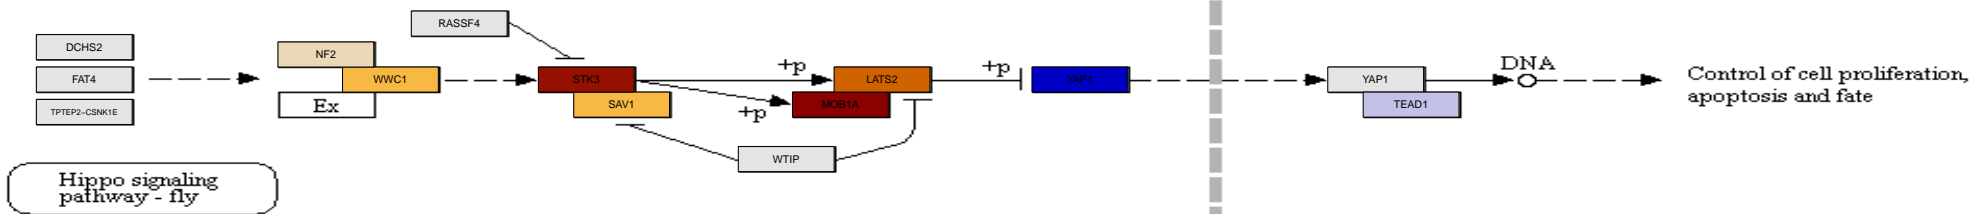

**C. elegans**

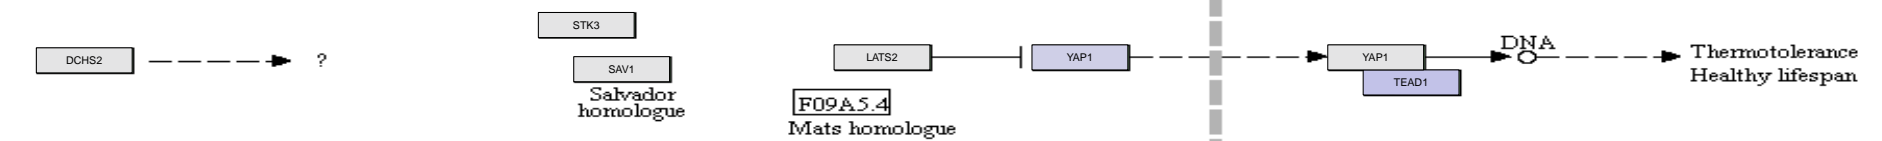

**S. cerevisiae**

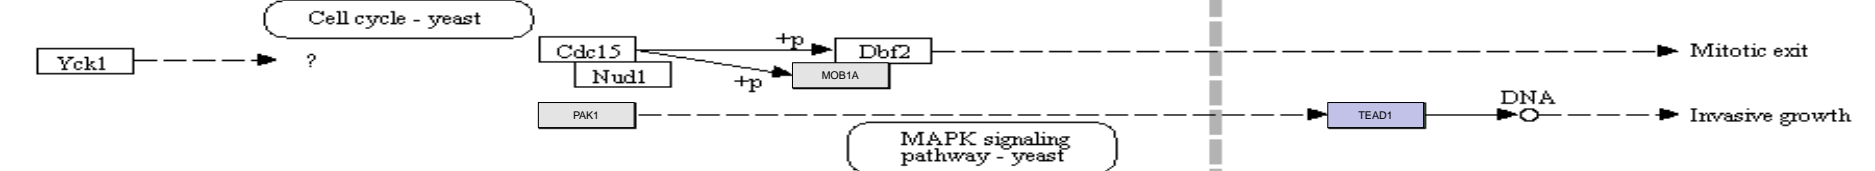

Hippo\_signaling\_pathway\_multiple\_species  
Newborn

**Mammals**

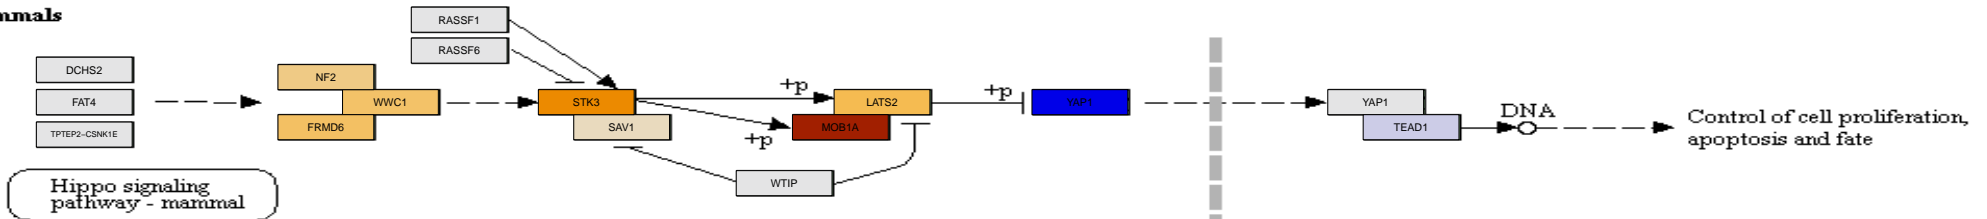

**Drosophila**

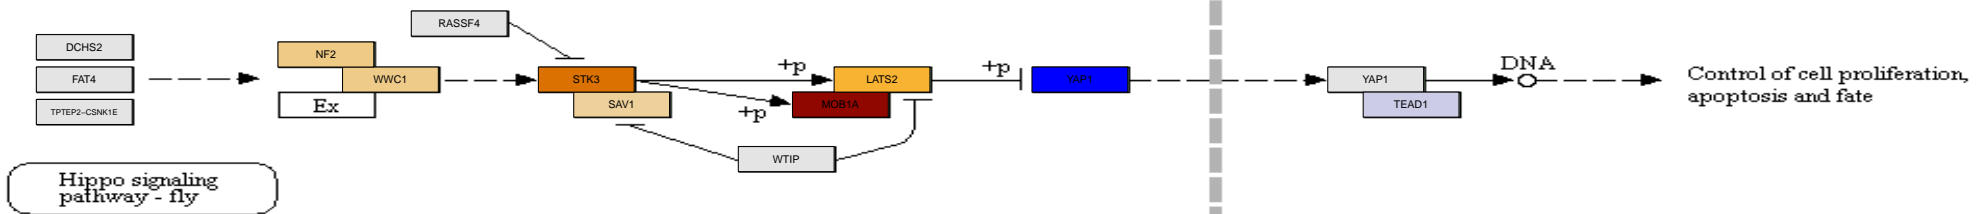

**C. elegans**

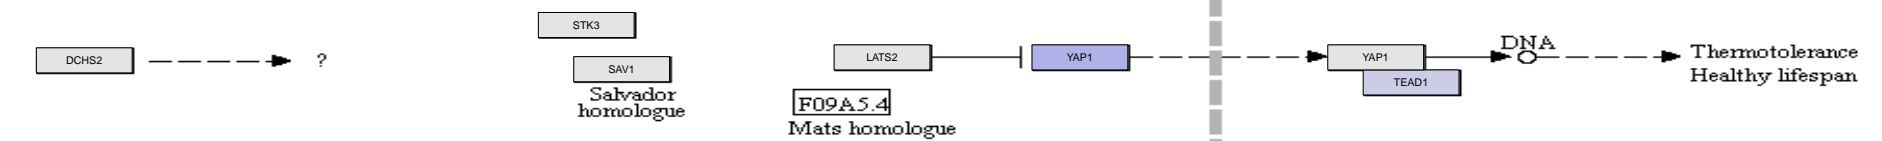

**S. cerevisiae**

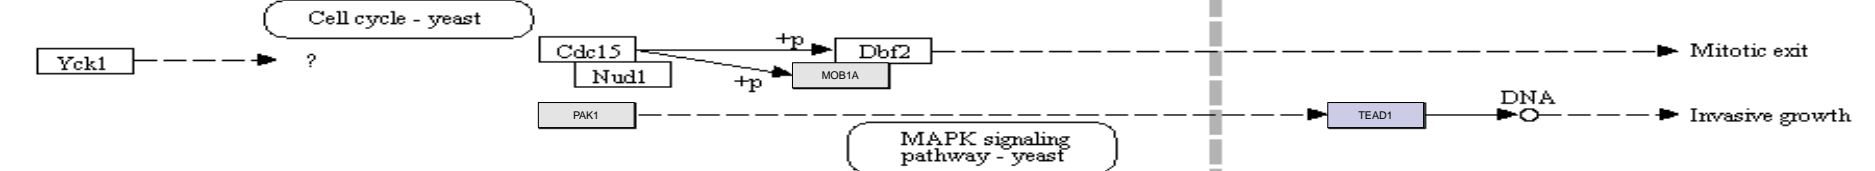

Hippo\_signaling\_pathway\_multiple\_species  
Baby

**Mammals**

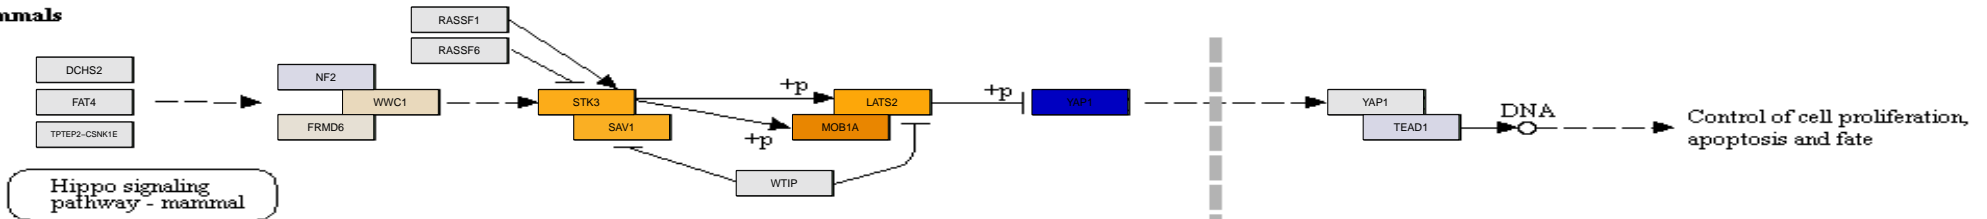

**Drosophila**

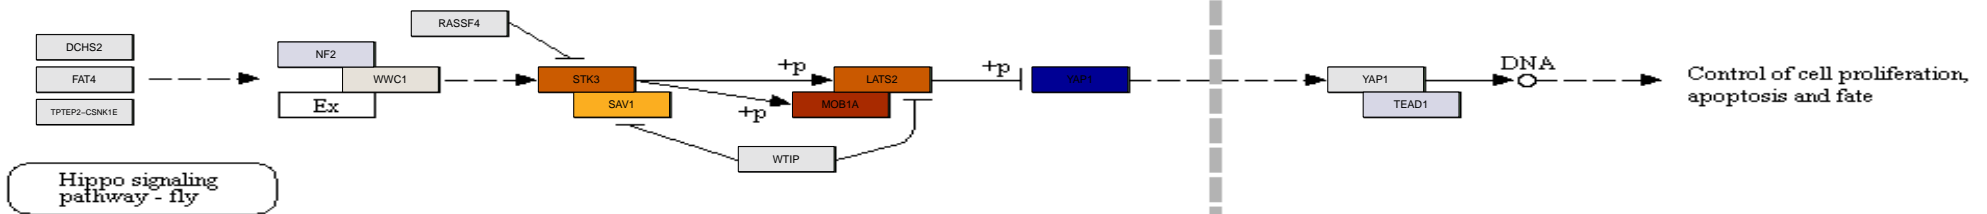

**C. elegans**

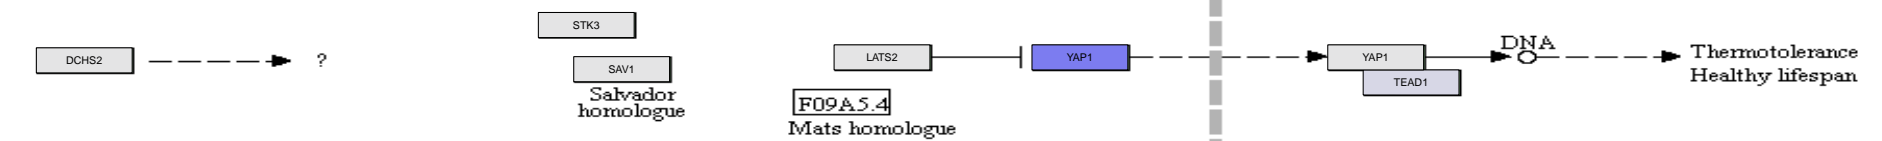

**S. cerevisiae**

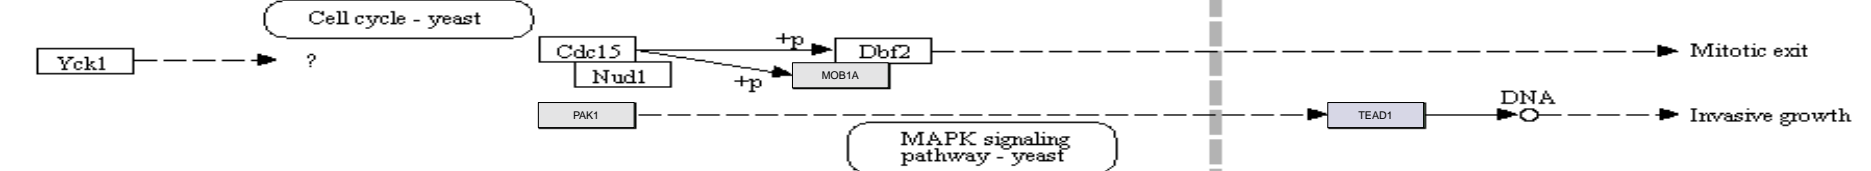

Hippo\_signaling\_pathway\_multiple\_species  
Infant

**Mammals**

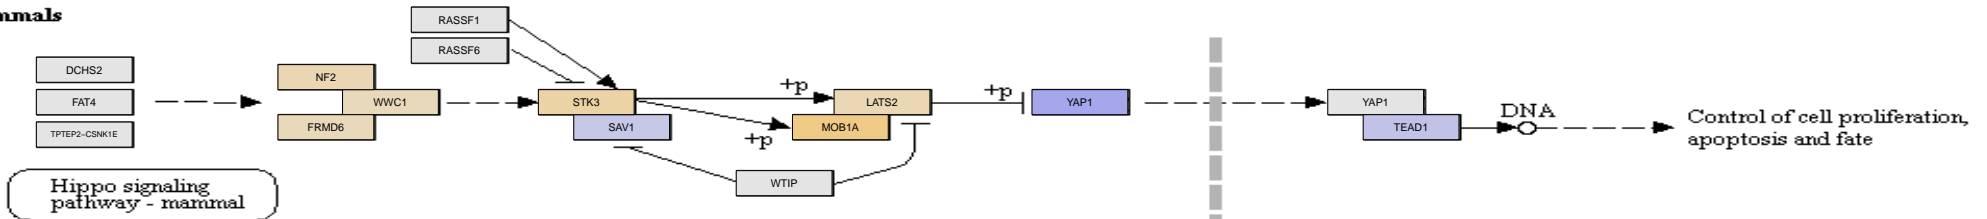

**Drosophila**

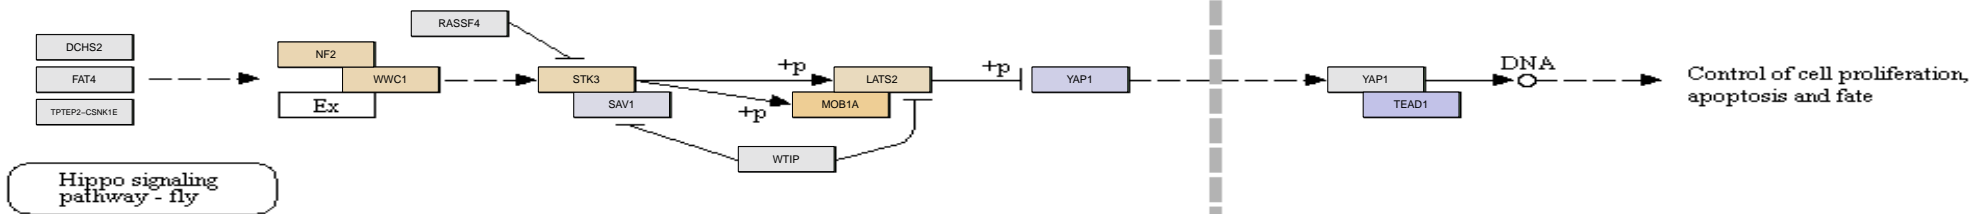

**C. elegans**

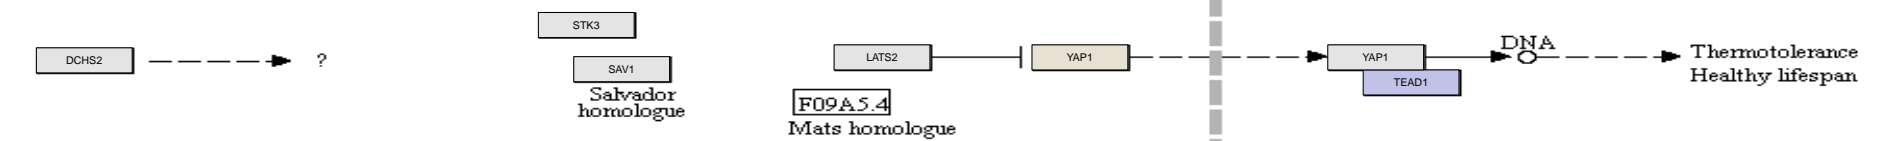

**S. cerevisiae**



Hippo\_signaling\_pathway\_multiple\_species  
Teenager

**Mammals**

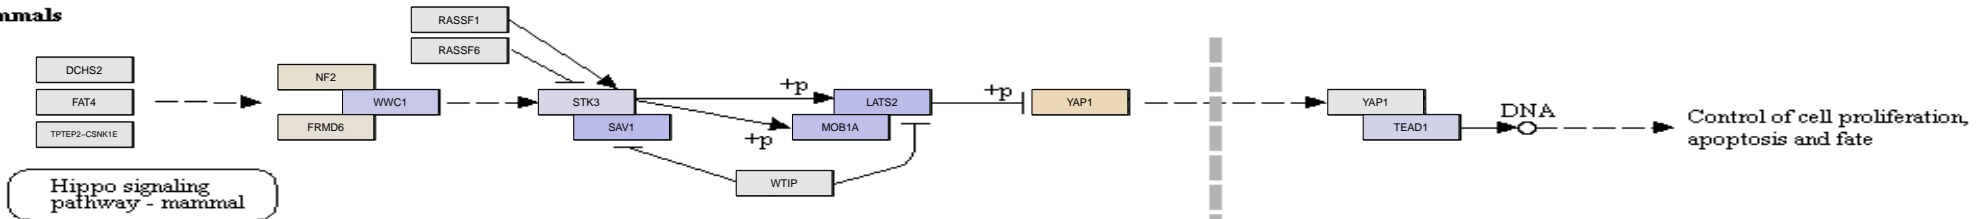

**Drosophila**

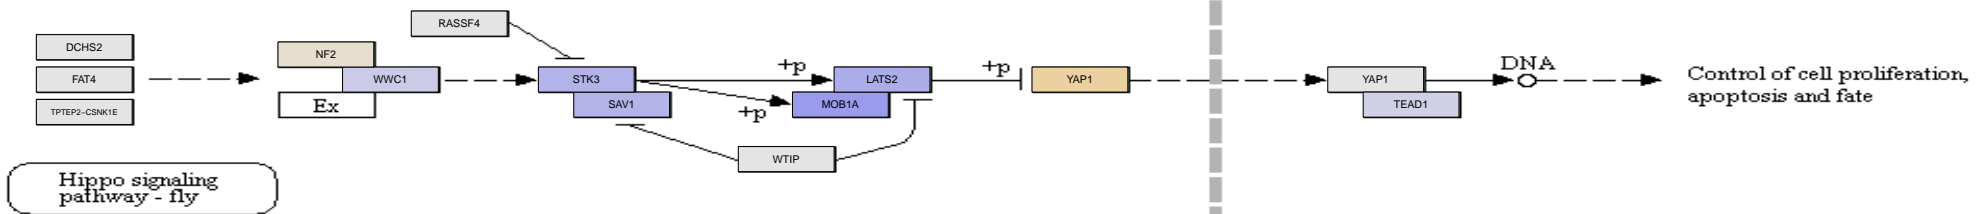

**C. elegans**

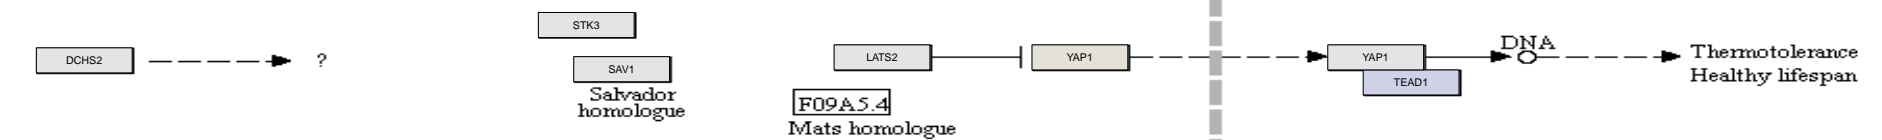

**S. cerevisiae**

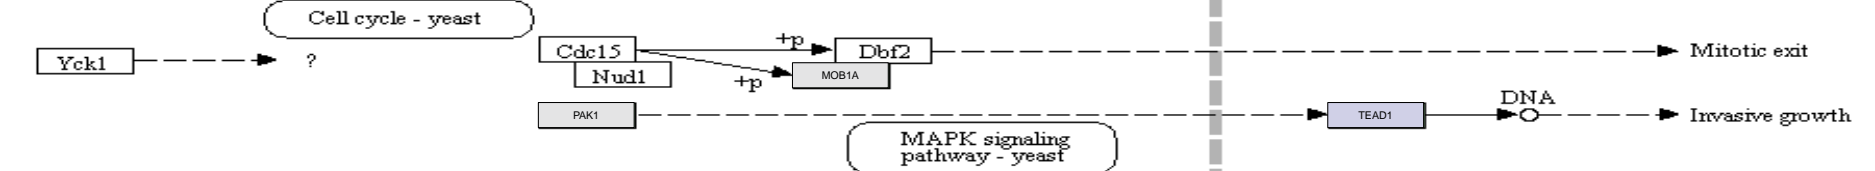



Hippo\_signaling\_pathway\_multiple\_species  
Adult

**Mammals**

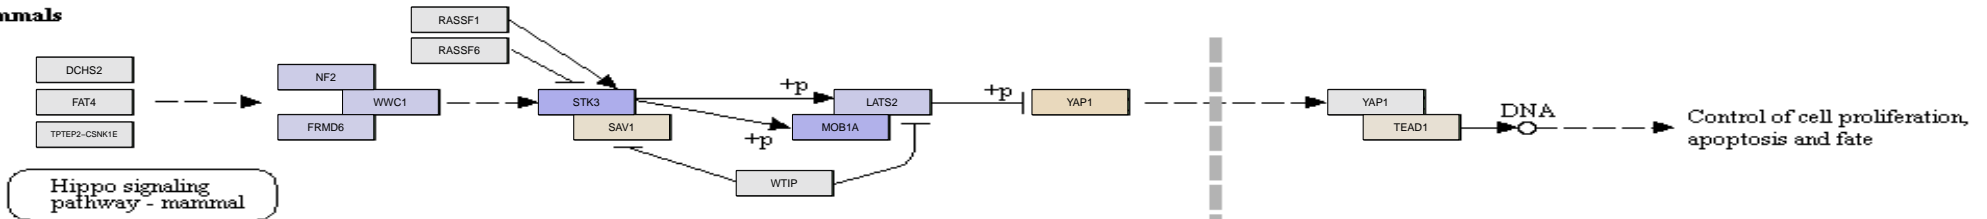

**Drosophila**

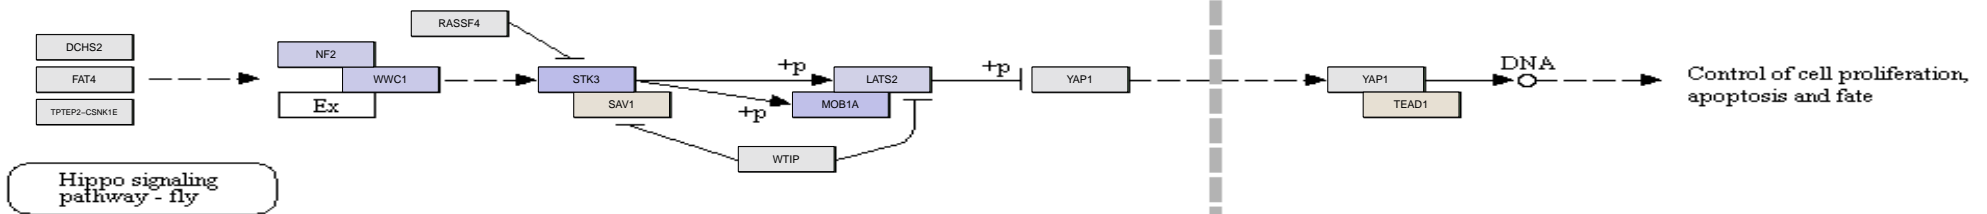

**C. elegans**

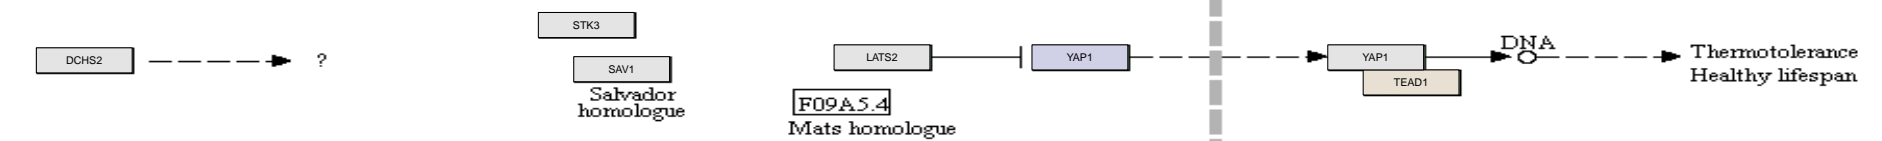

**S. cerevisiae**

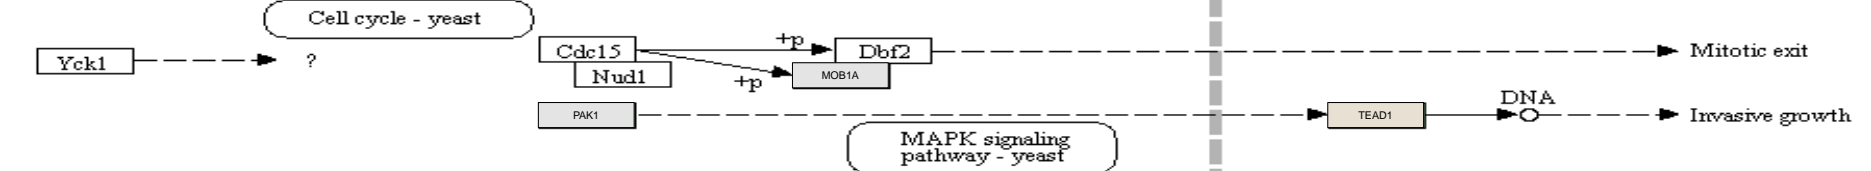

Hippo\_signaling\_pathway\_multiple\_species  
Late adult

**Mammals**

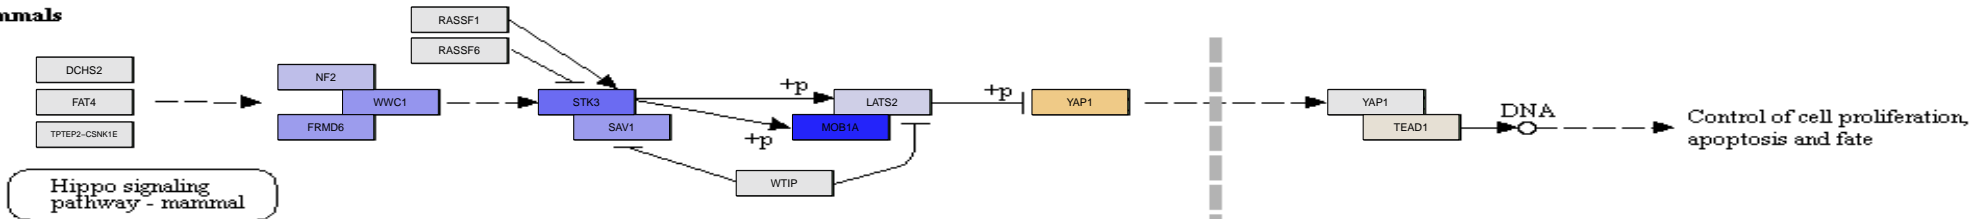

**Drosophila**

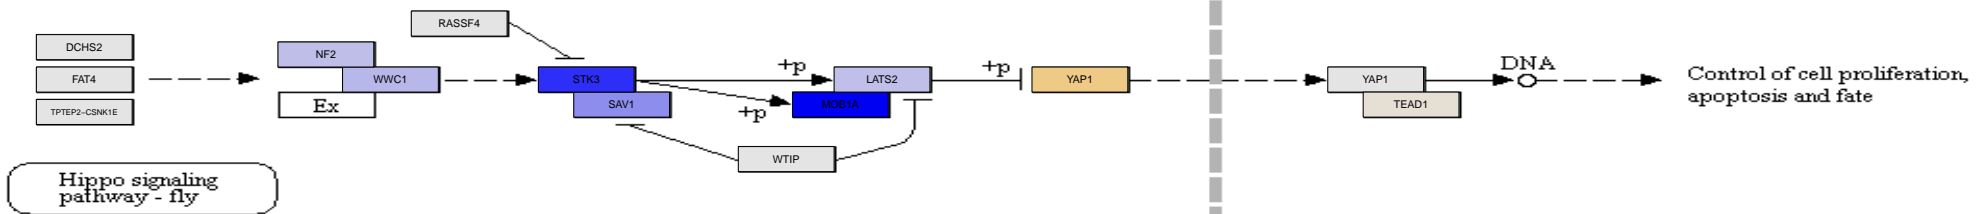

**C. elegans**

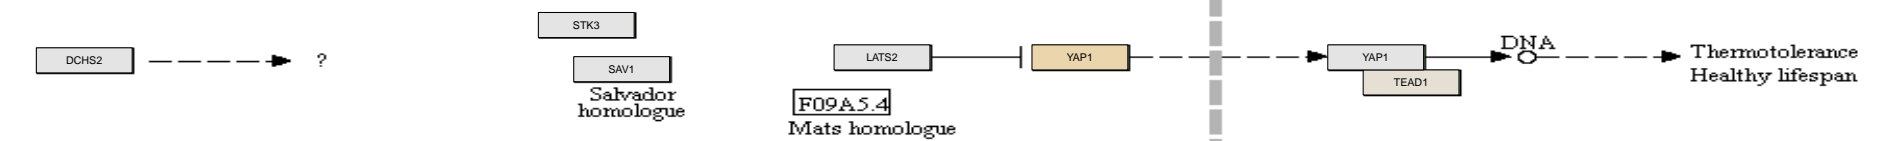

**S. cerevisiae**

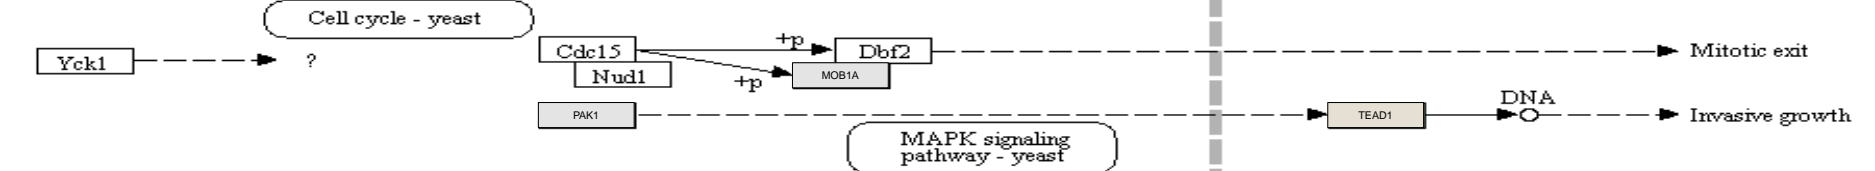

Supplement: s1 [file s1]
