# Supplementary material for: The Transcriptome and Methylome of the Developing and Aging Brain and Their Relations to Gliomas and Psychological Disorders
Source: MDPI journal article supplement (doi:10.3390/cells11030362), 2022-01-21

RIG-I-like receptor signaling pathway

all genes

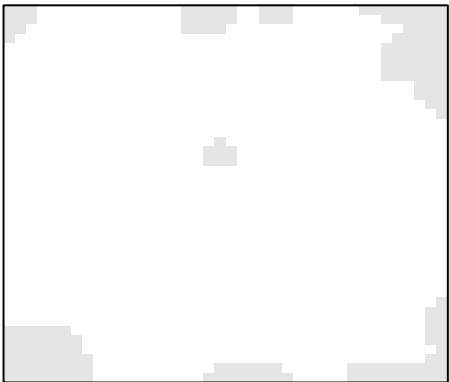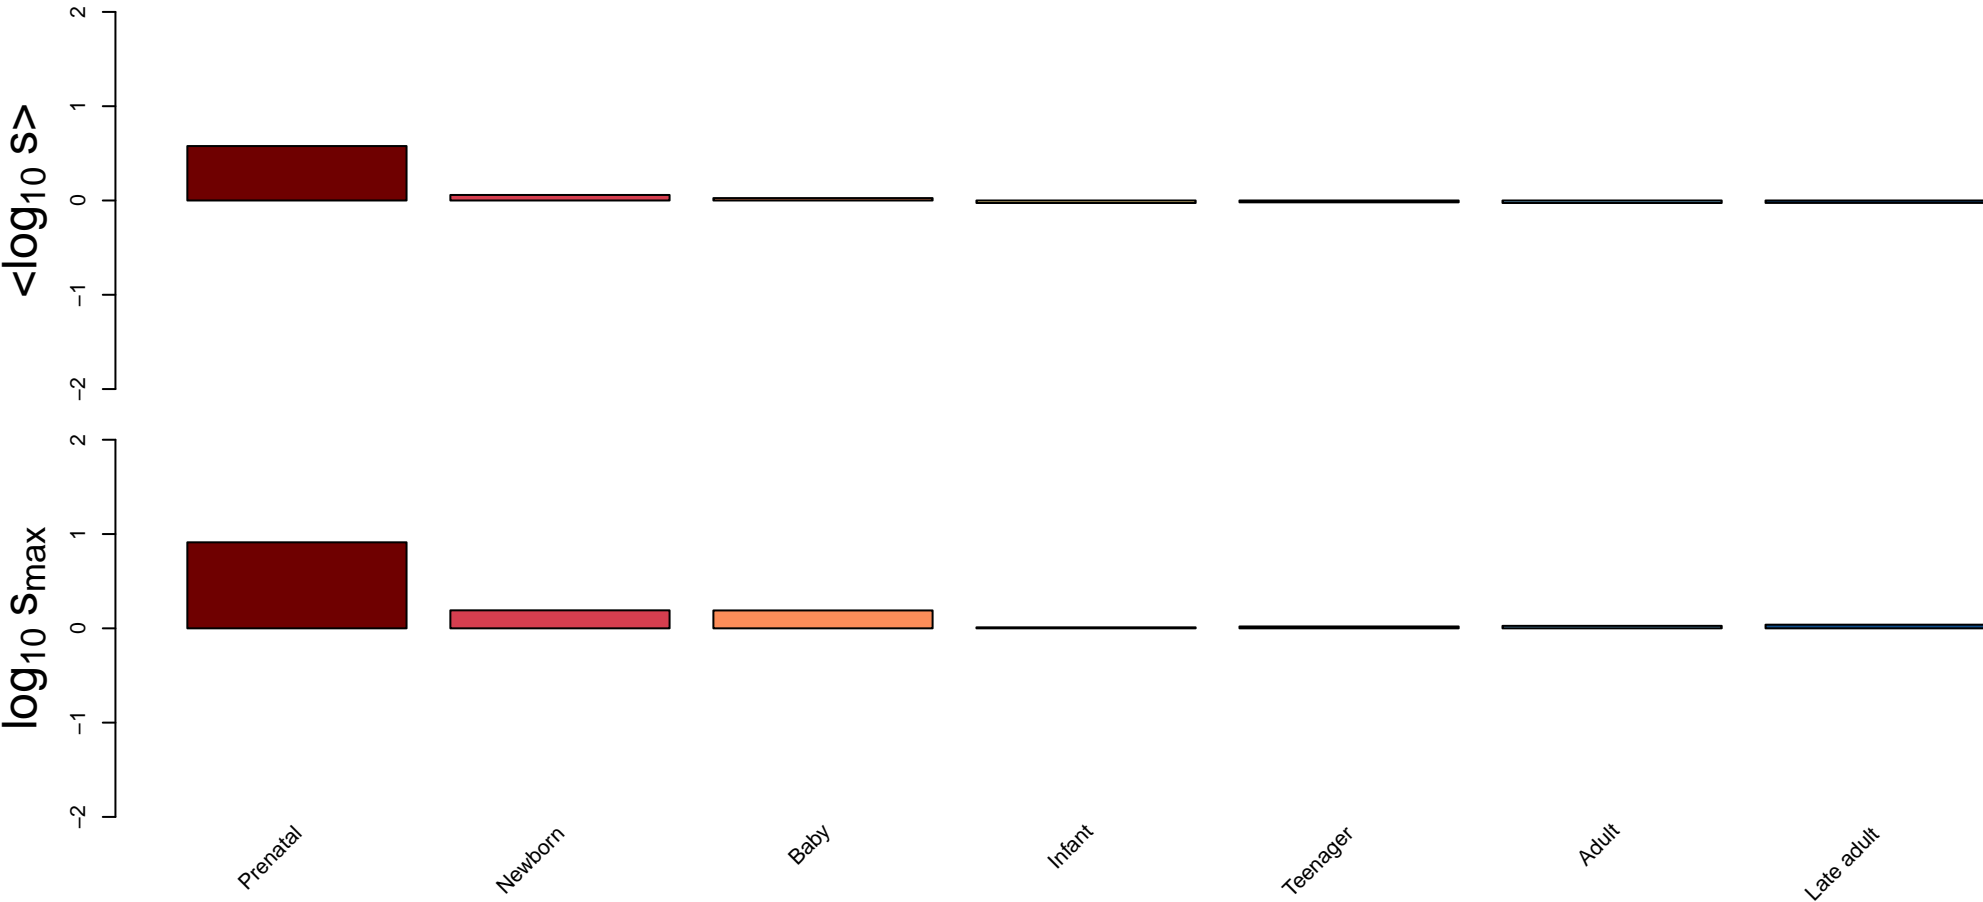

RIG-I like receptor signaling pathway  
genes with data

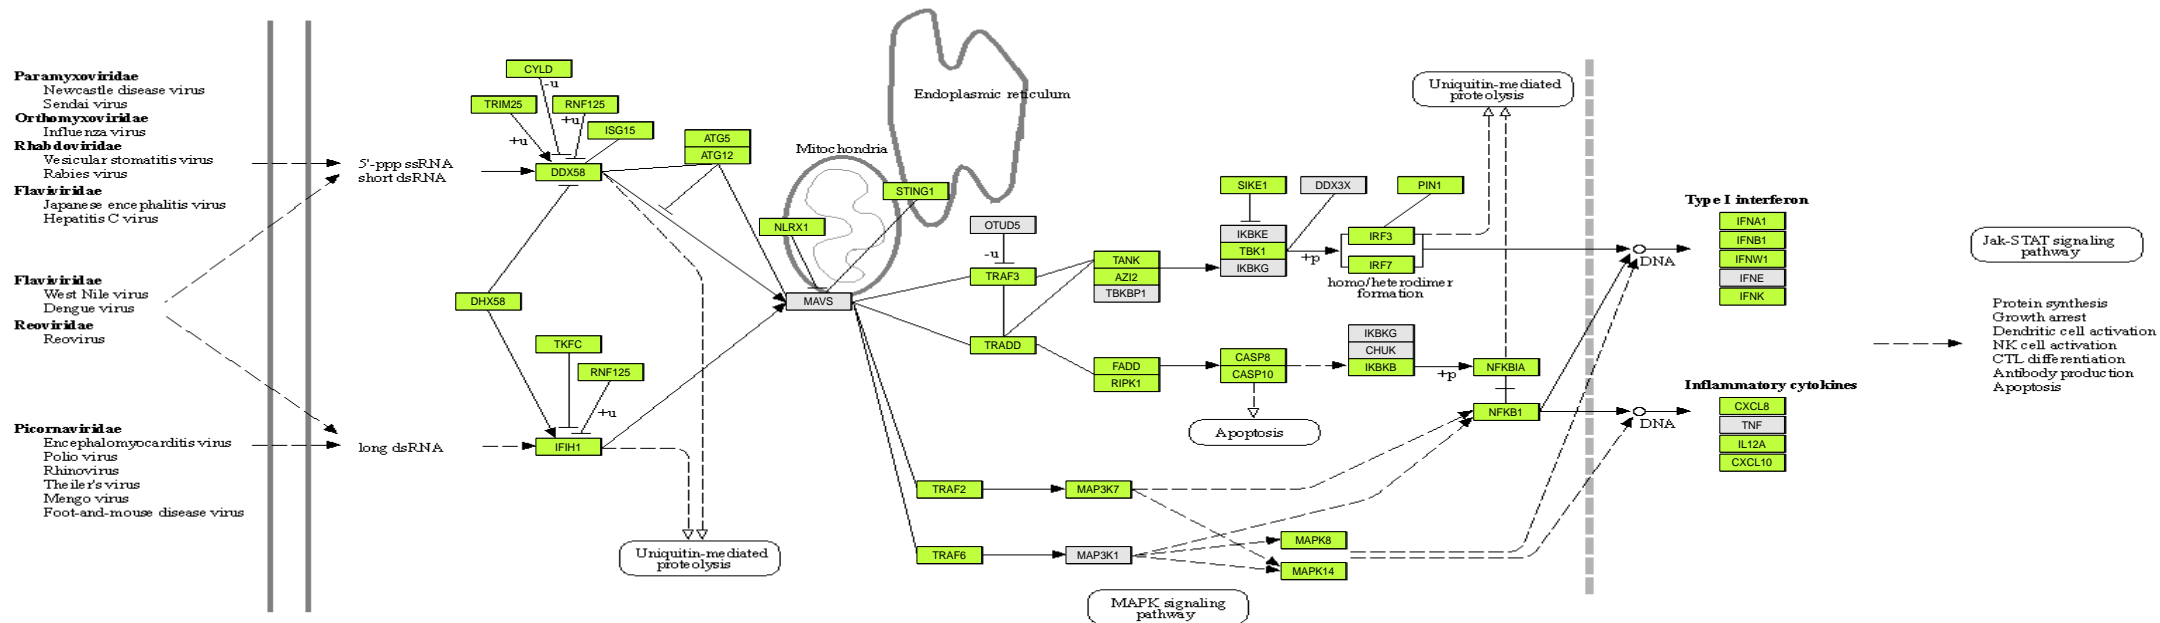

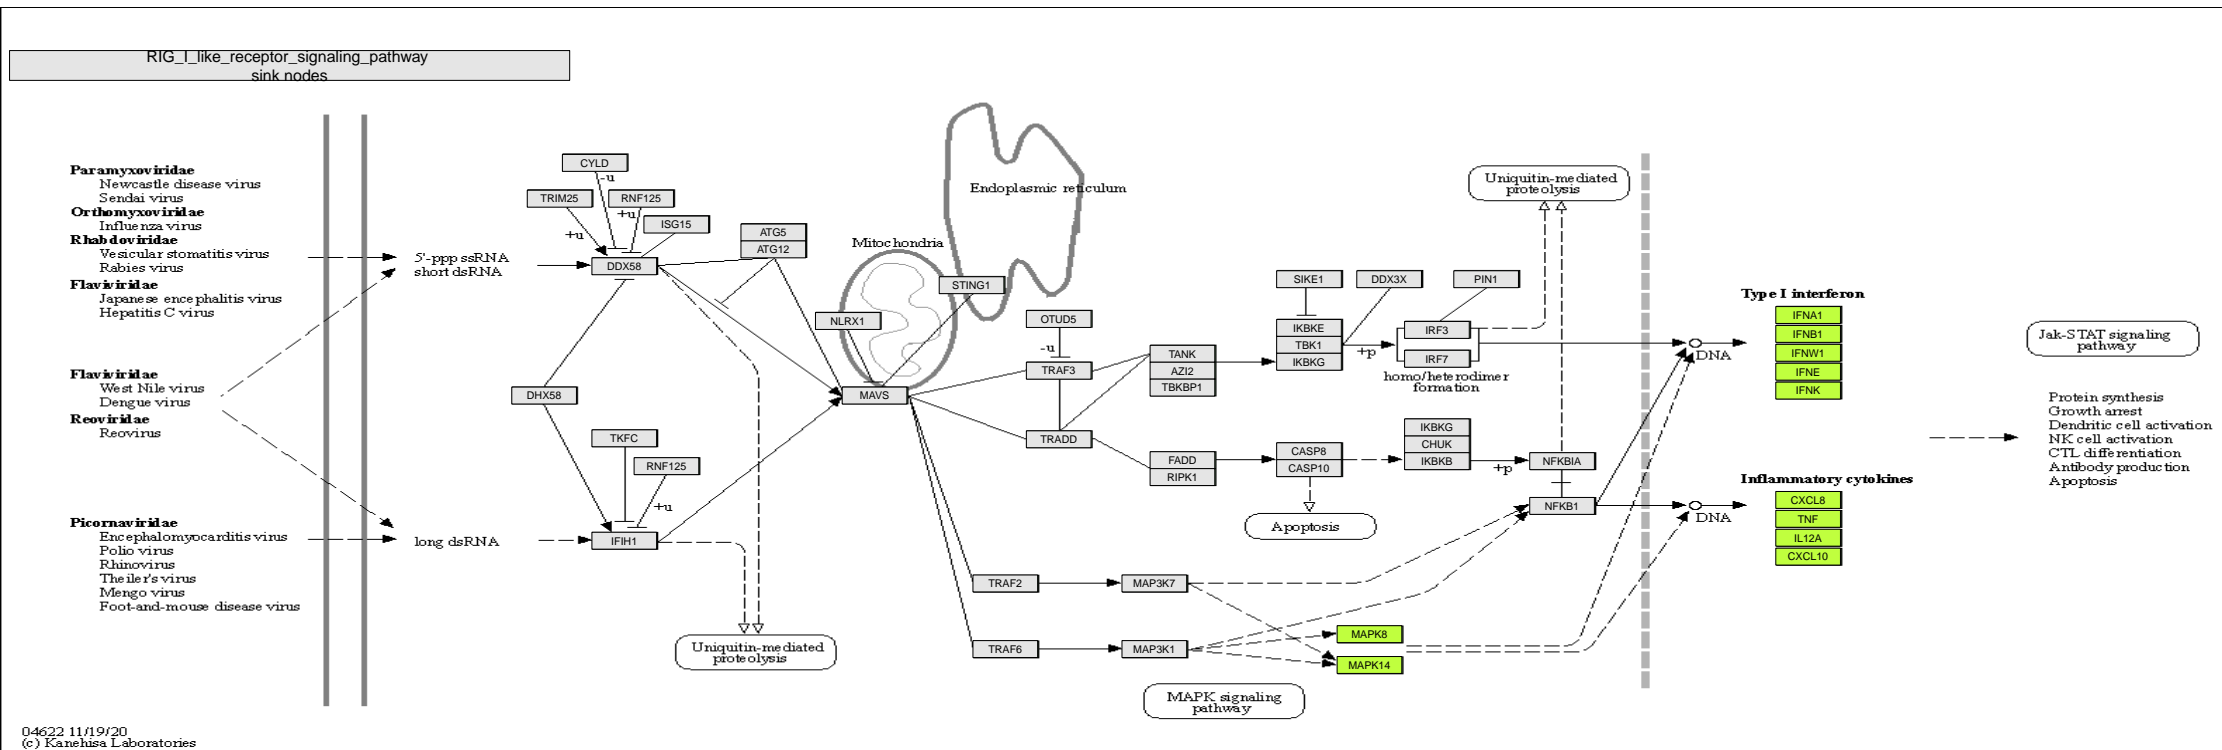

|                                       |
|---------------------------------------|
| RIG_I_like_receptor_signaling_pathway |
| Prenatal                              |

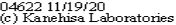

RIG\_I\_like\_receptor\_signaling\_pathway  
Newborn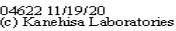

# RIG-I like receptor signaling pathway Baby

- Paramyxoviridae**  
Newcastle disease virus  
Sendai virus
- Orthomyxoviridae**  
Influenza virus
- Rhabdoviridae**  
Vesicular stomatitis virus  
Rabies virus
- Flaviviridae**  
Japanese encephalitis virus  
Hepatitis C virus
- Flaviviridae**  
West Nile virus  
Dengue virus
- Reoviridae**  
Reovirus
- Picornaviridae**  
Encephalomyocarditis virus  
Polio virus  
Rhinovirus  
Theiler's virus  
Mengo virus  
Foot-and-mouth disease virus

5'-ppp ssRNA  
short dsRNA

long dsRNA

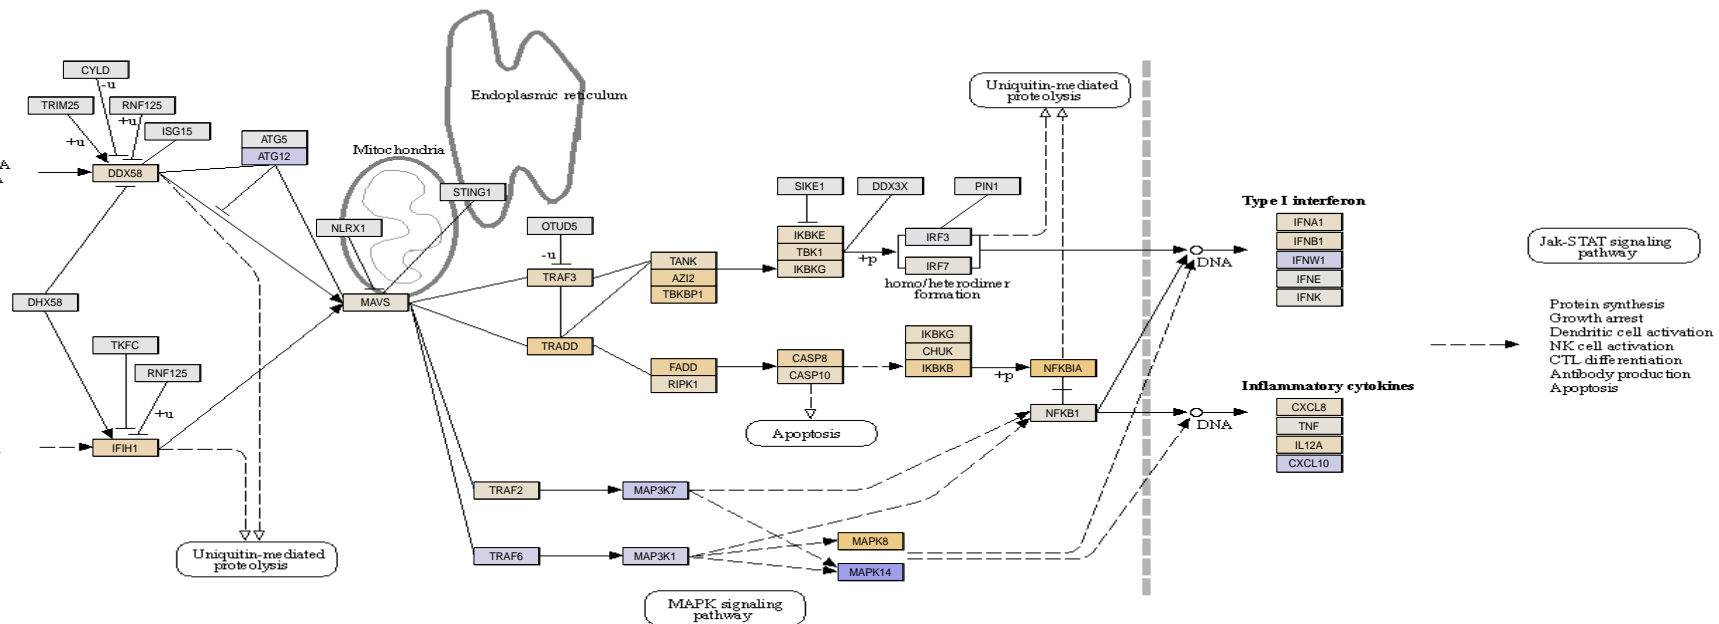

# RIG-I like receptor signaling pathway Infant

- Paramyxoviridae**  
Newcastle disease virus  
Sendai virus
- Orthomyxoviridae**  
Influenza virus
- Rhabdoviridae**  
Vesicular stomatitis virus  
Rabies virus
- Flaviviridae**  
Japanese encephalitis virus  
Hepatitis C virus
- Flaviviridae**  
West Nile virus  
Dengue virus
- Reoviridae**  
Reovirus
- Picornaviridae**  
Encephalomyocarditis virus  
Polio virus  
Rhinovirus  
Theiler's virus  
Mengo virus  
Foot-and-mouth disease virus

5'-ppp ssRNA  
short dsRNA

long dsRNA

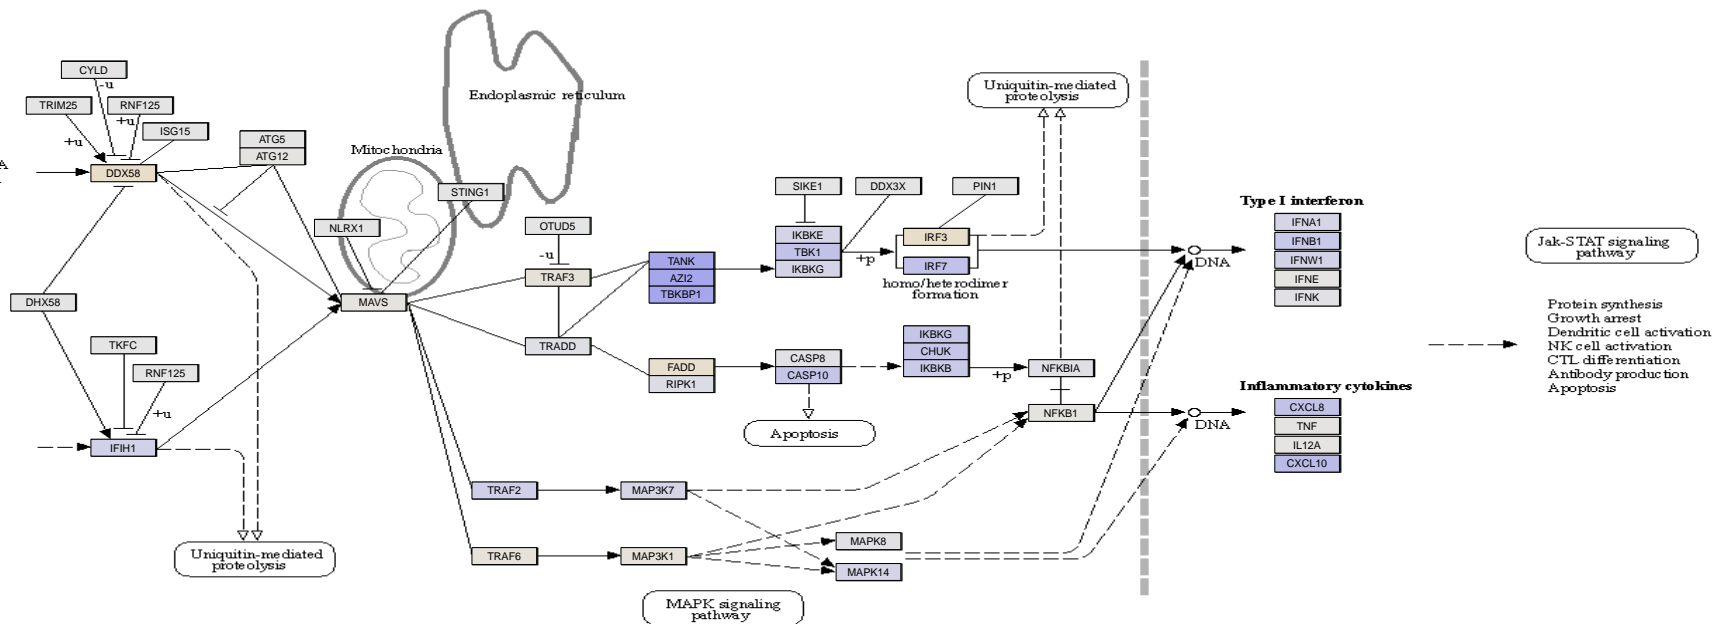

# RIG-I like receptor signaling pathway Teenager

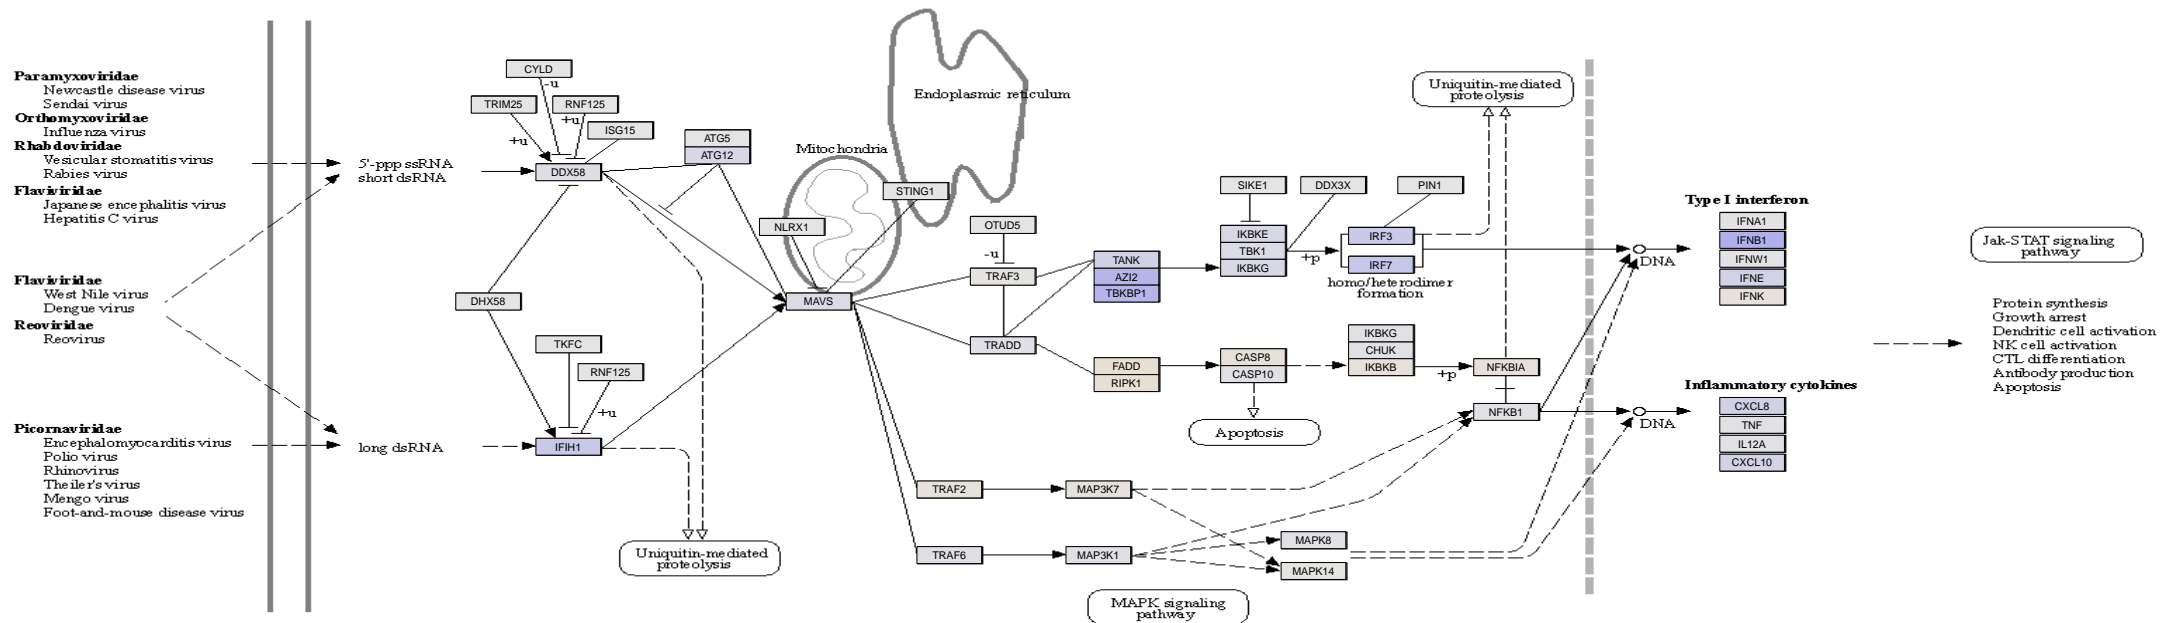





# RIG-I like receptor signaling pathway Late adult

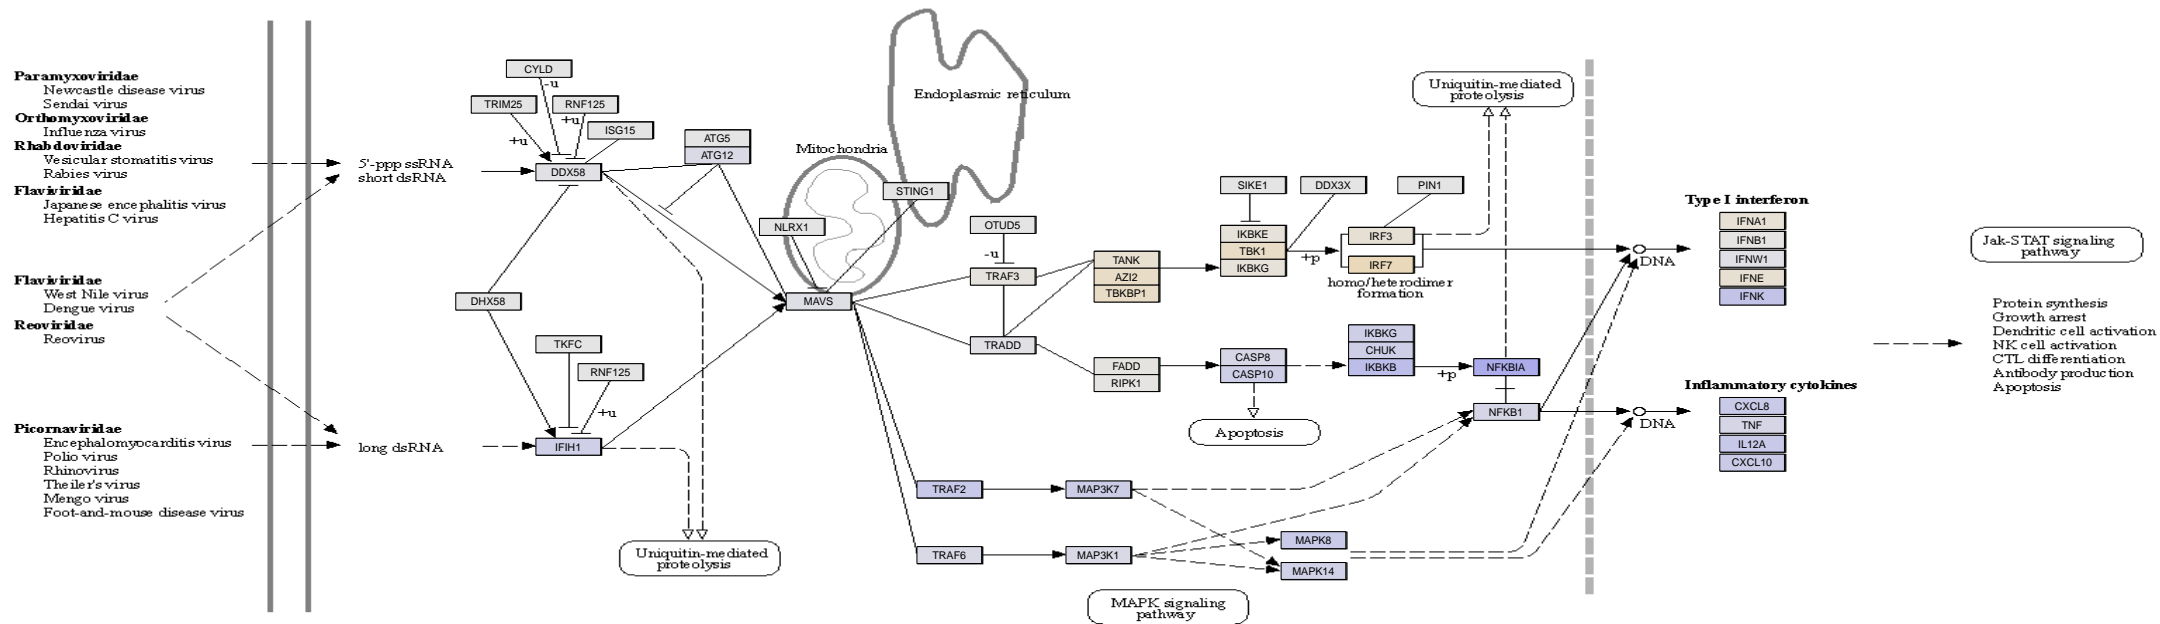

Supplement: s1 [file s1]
