# Supplementary material for: The Transcriptome and Methylome of the Developing and Aging Brain and Their Relations to Gliomas and Psychological Disorders
Source: MDPI journal article supplement (doi:10.3390/cells11030362), 2022-01-21

Chemokine signaling pathway

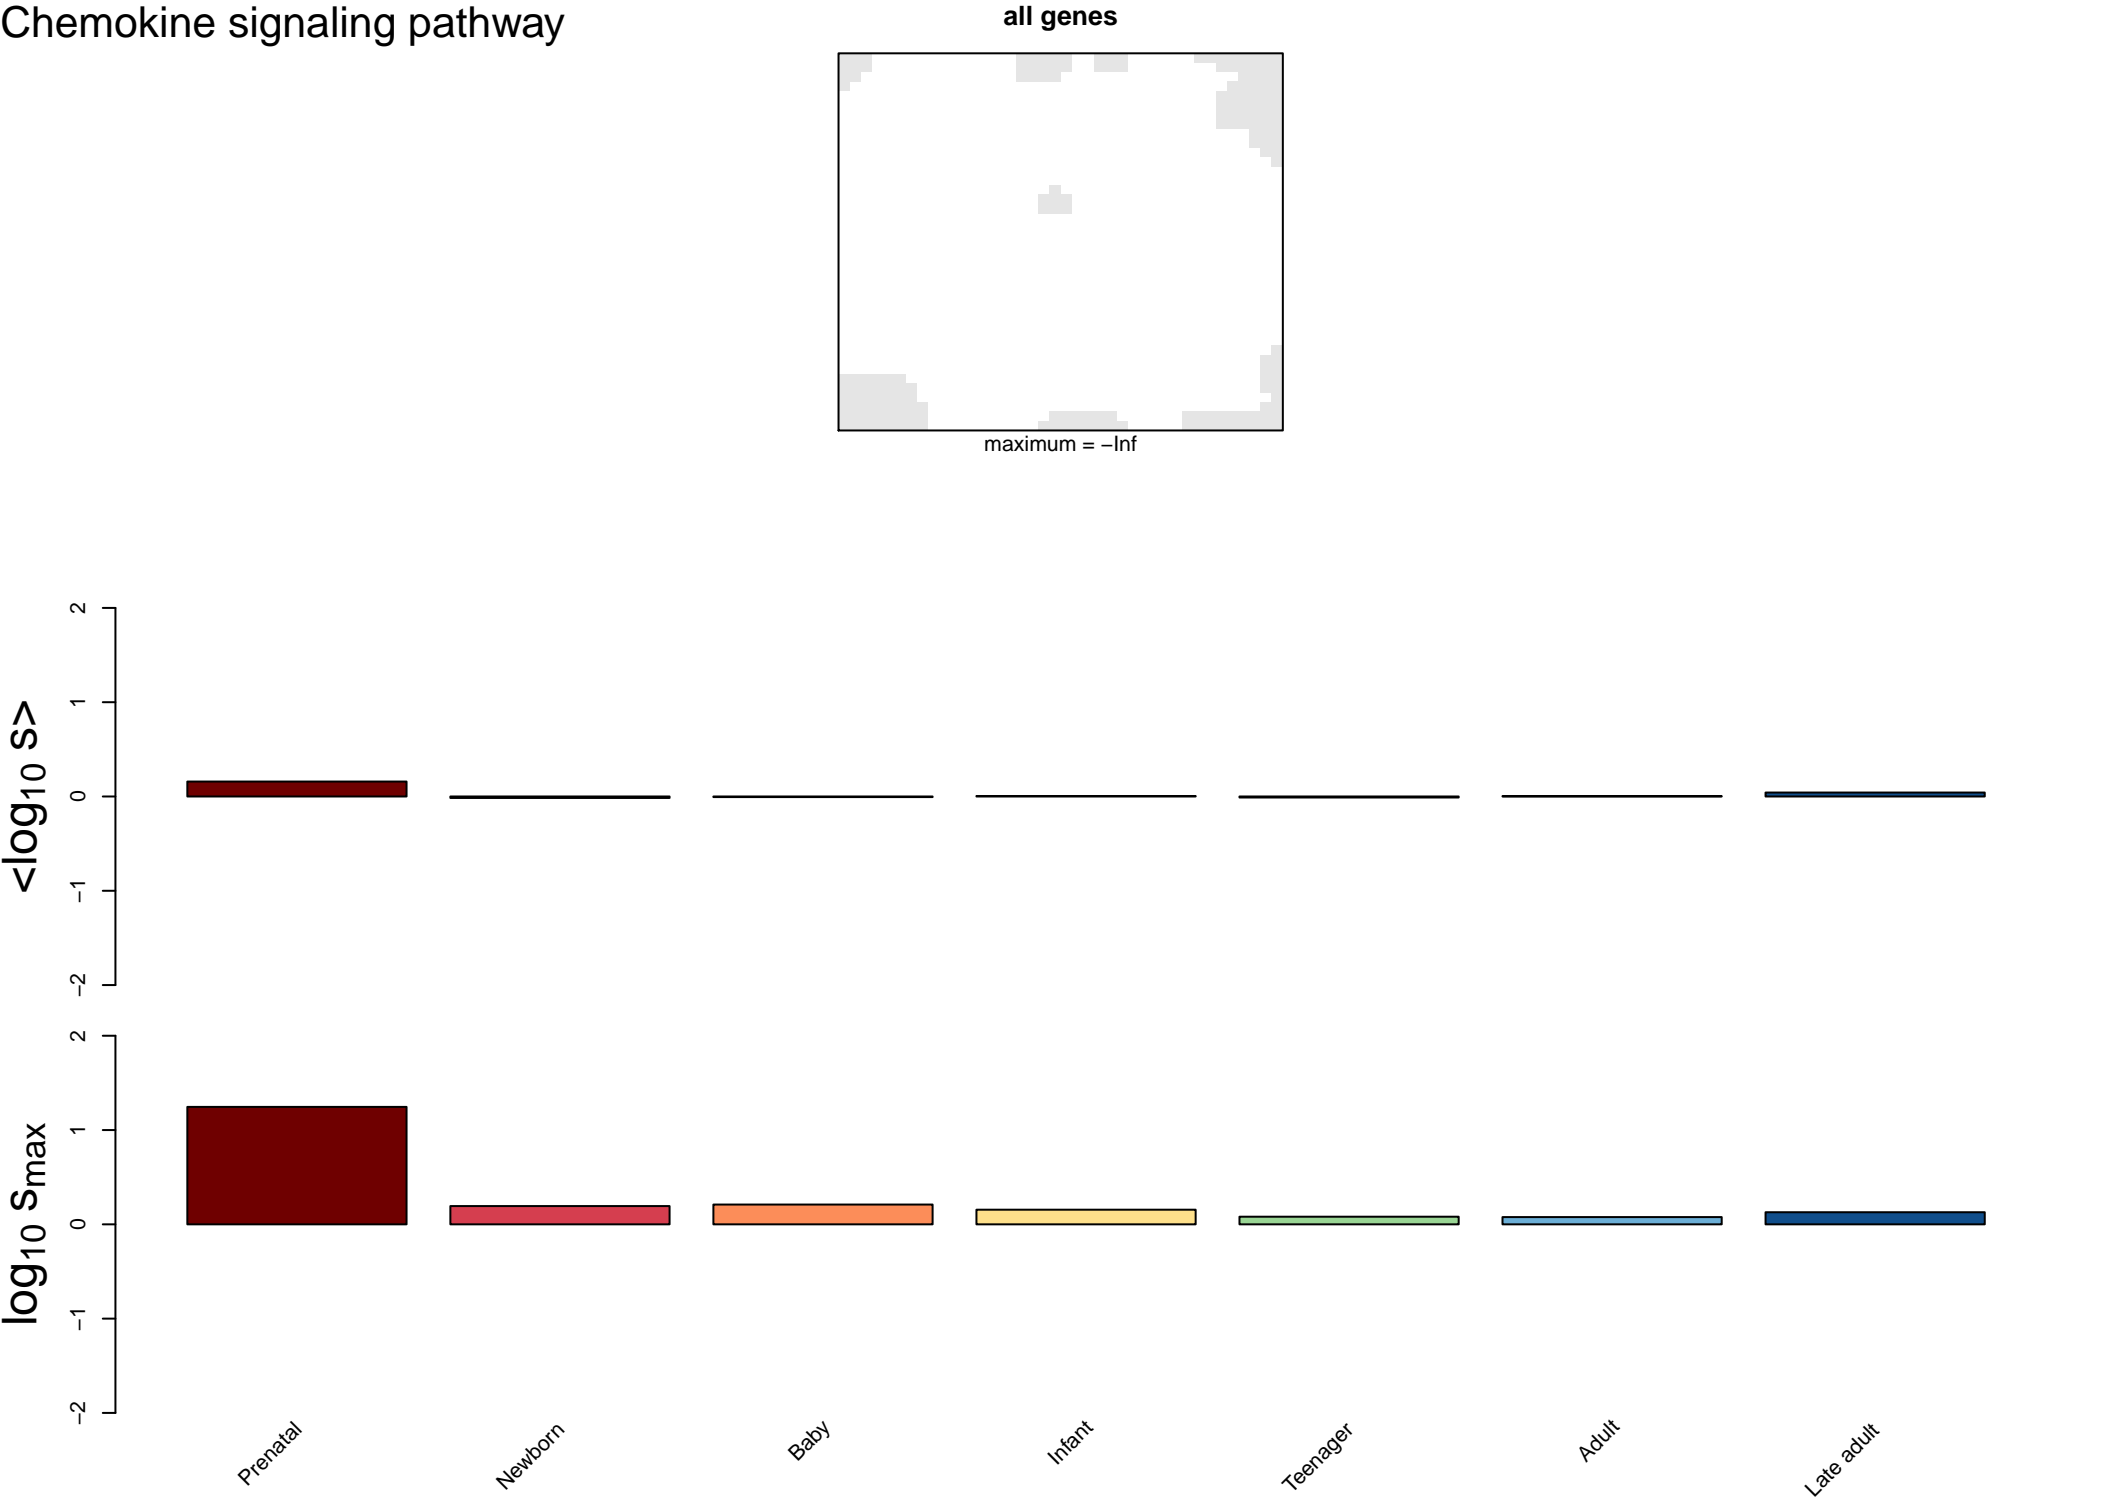

Chemokine\_signaling\_pathway  
genes with data

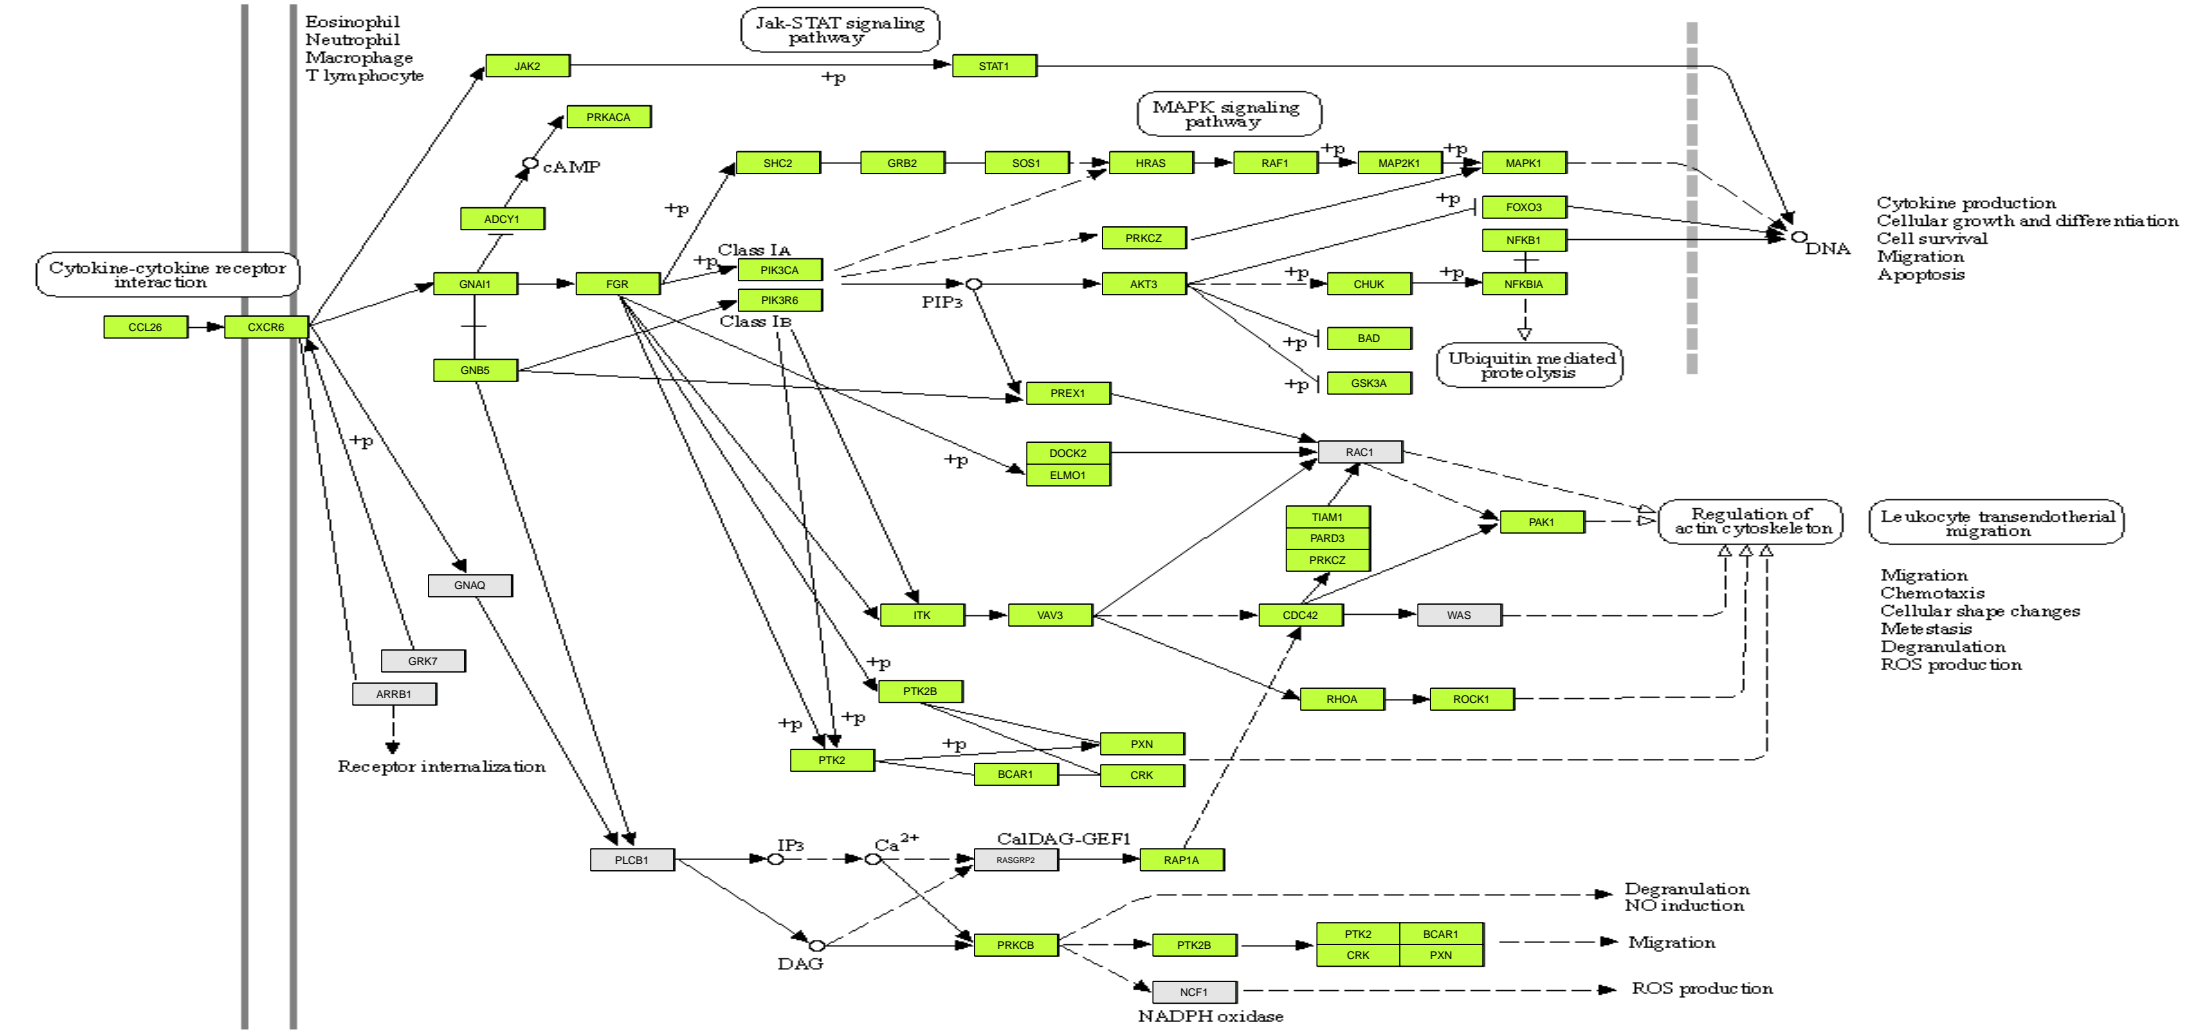

Chemokine\_signaling\_pathway  
sink nodes

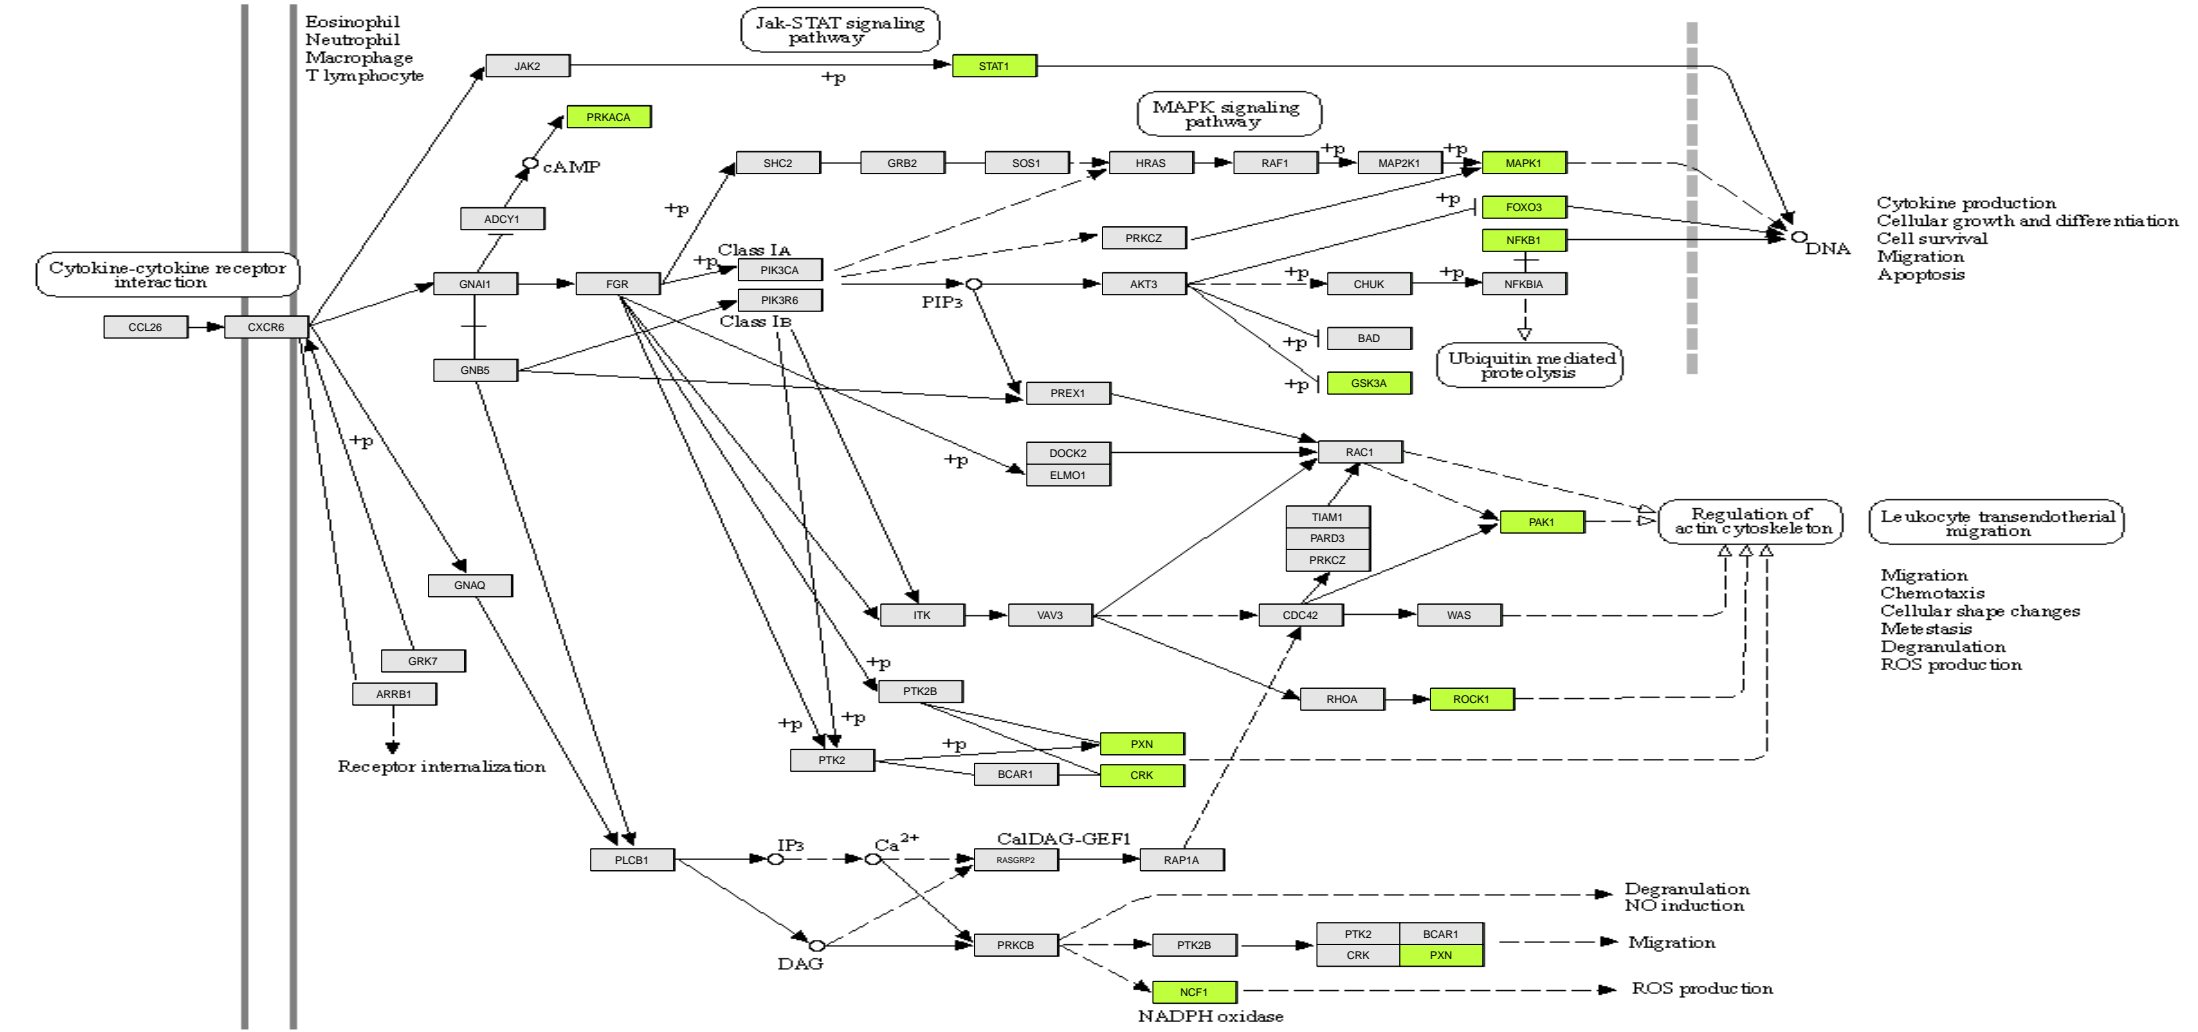

Chemokine signaling pathway  
Prenatal

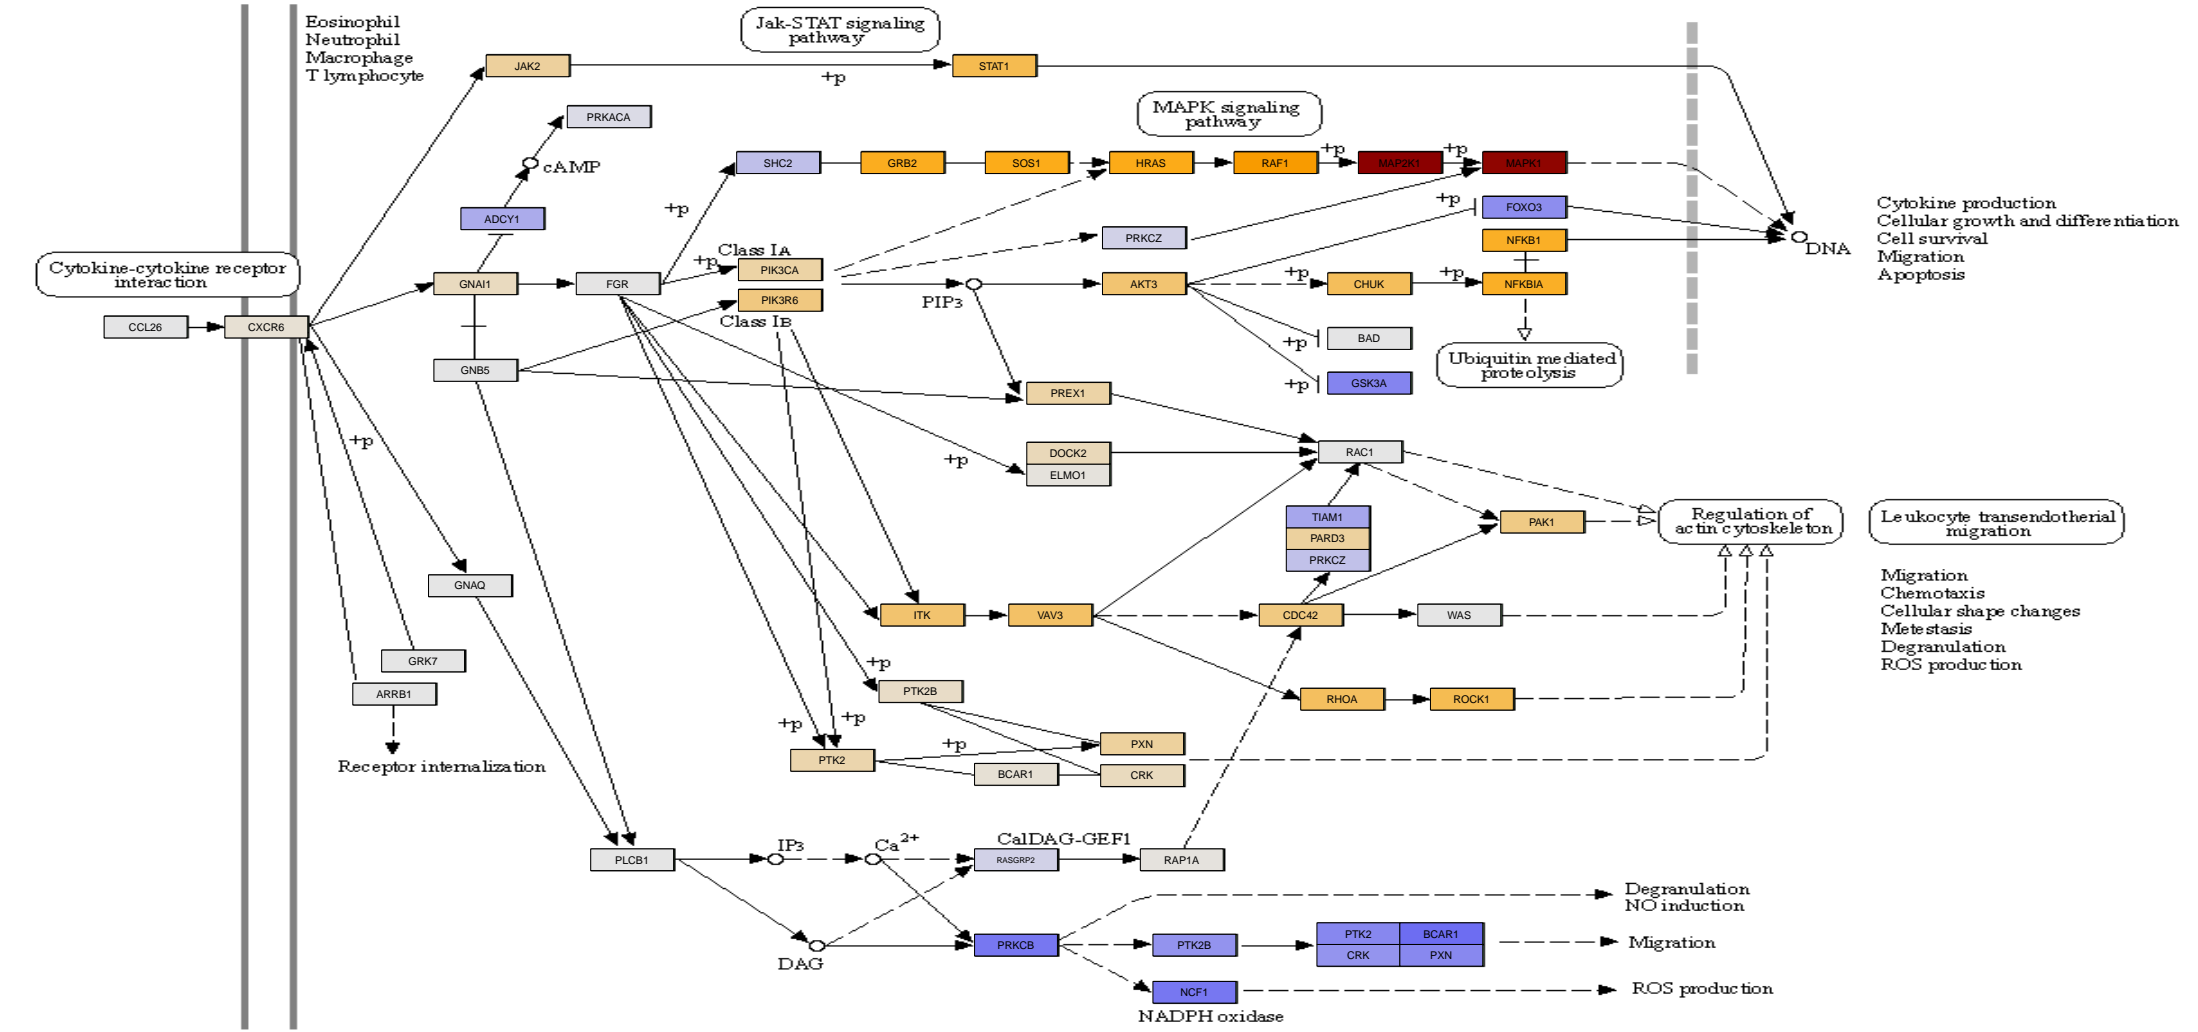

Chemokine signaling pathway  
Newborn

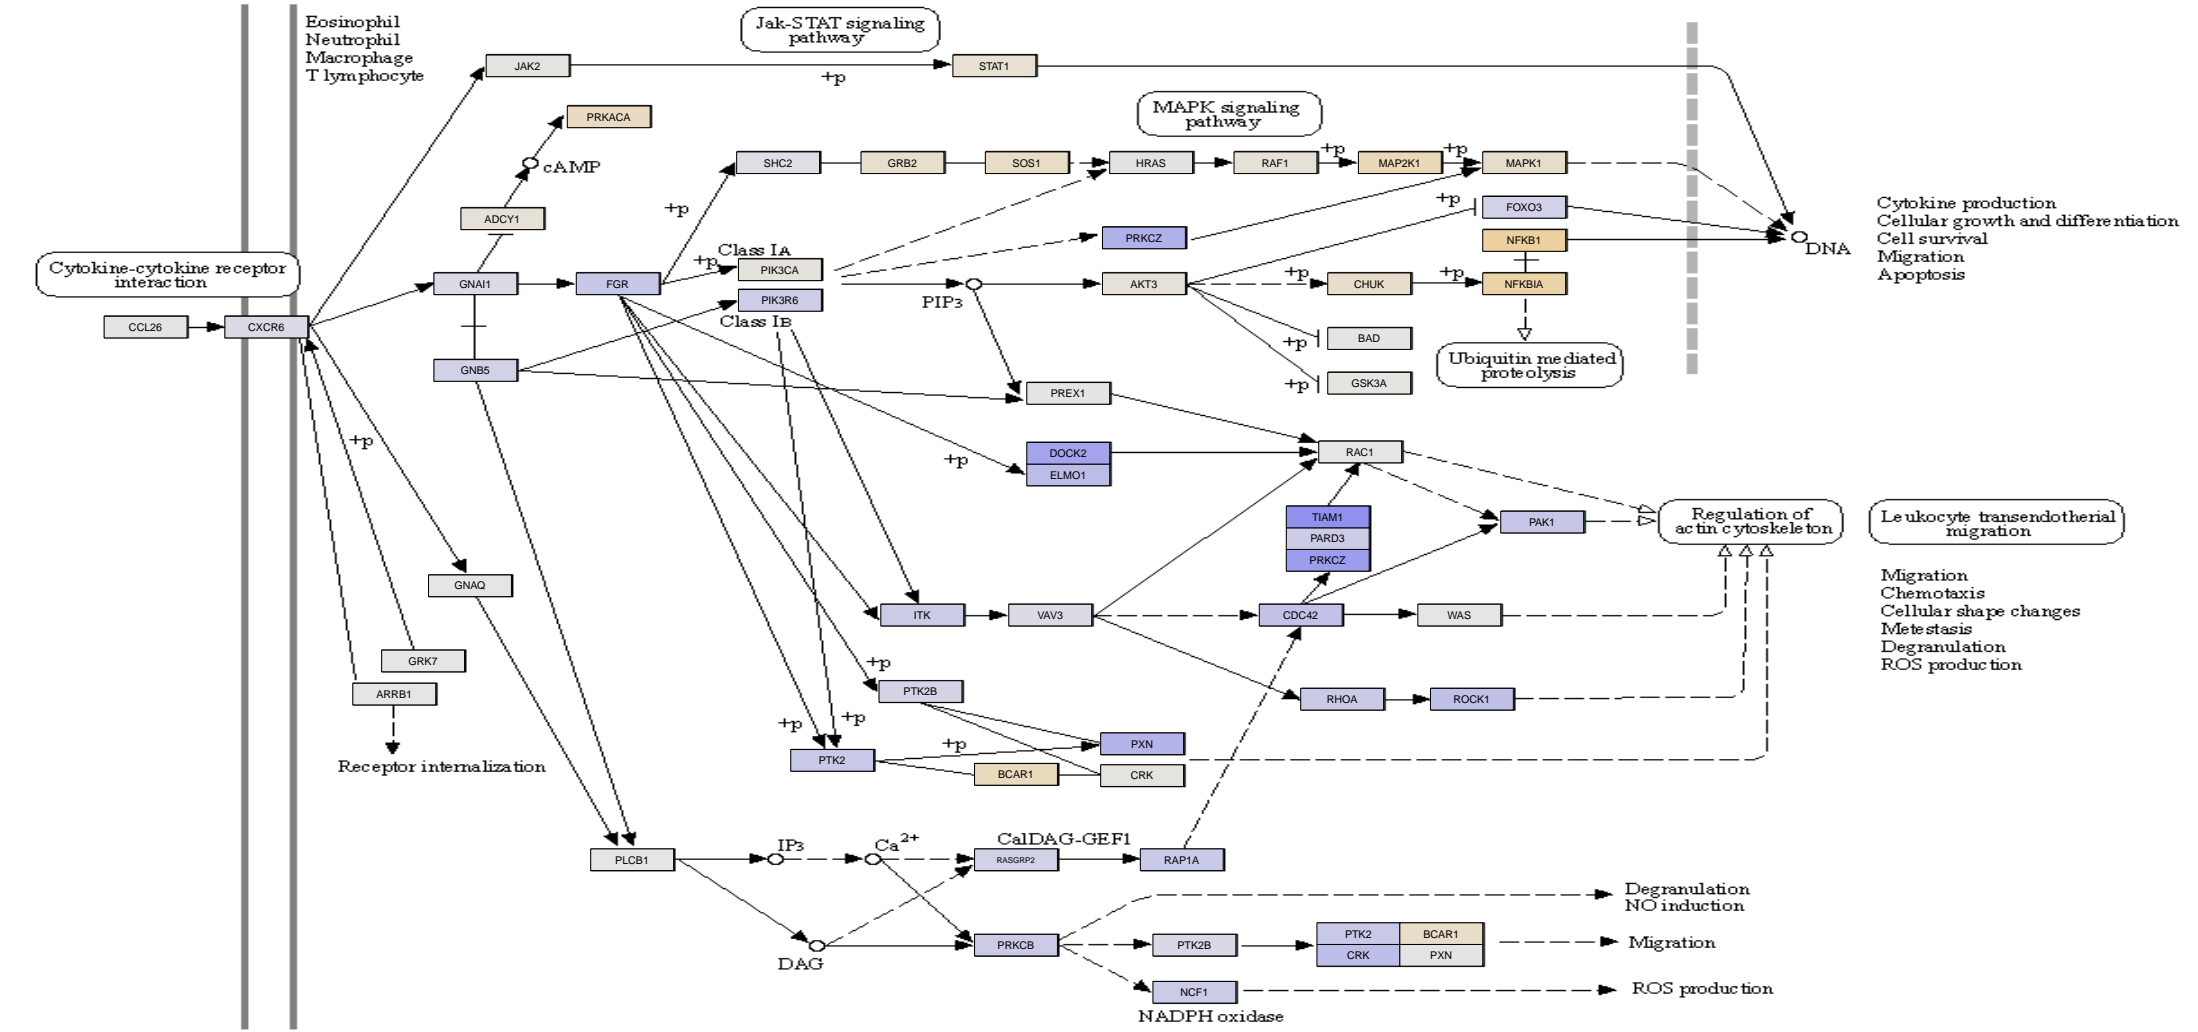

Chemokine signaling pathway  
Baby

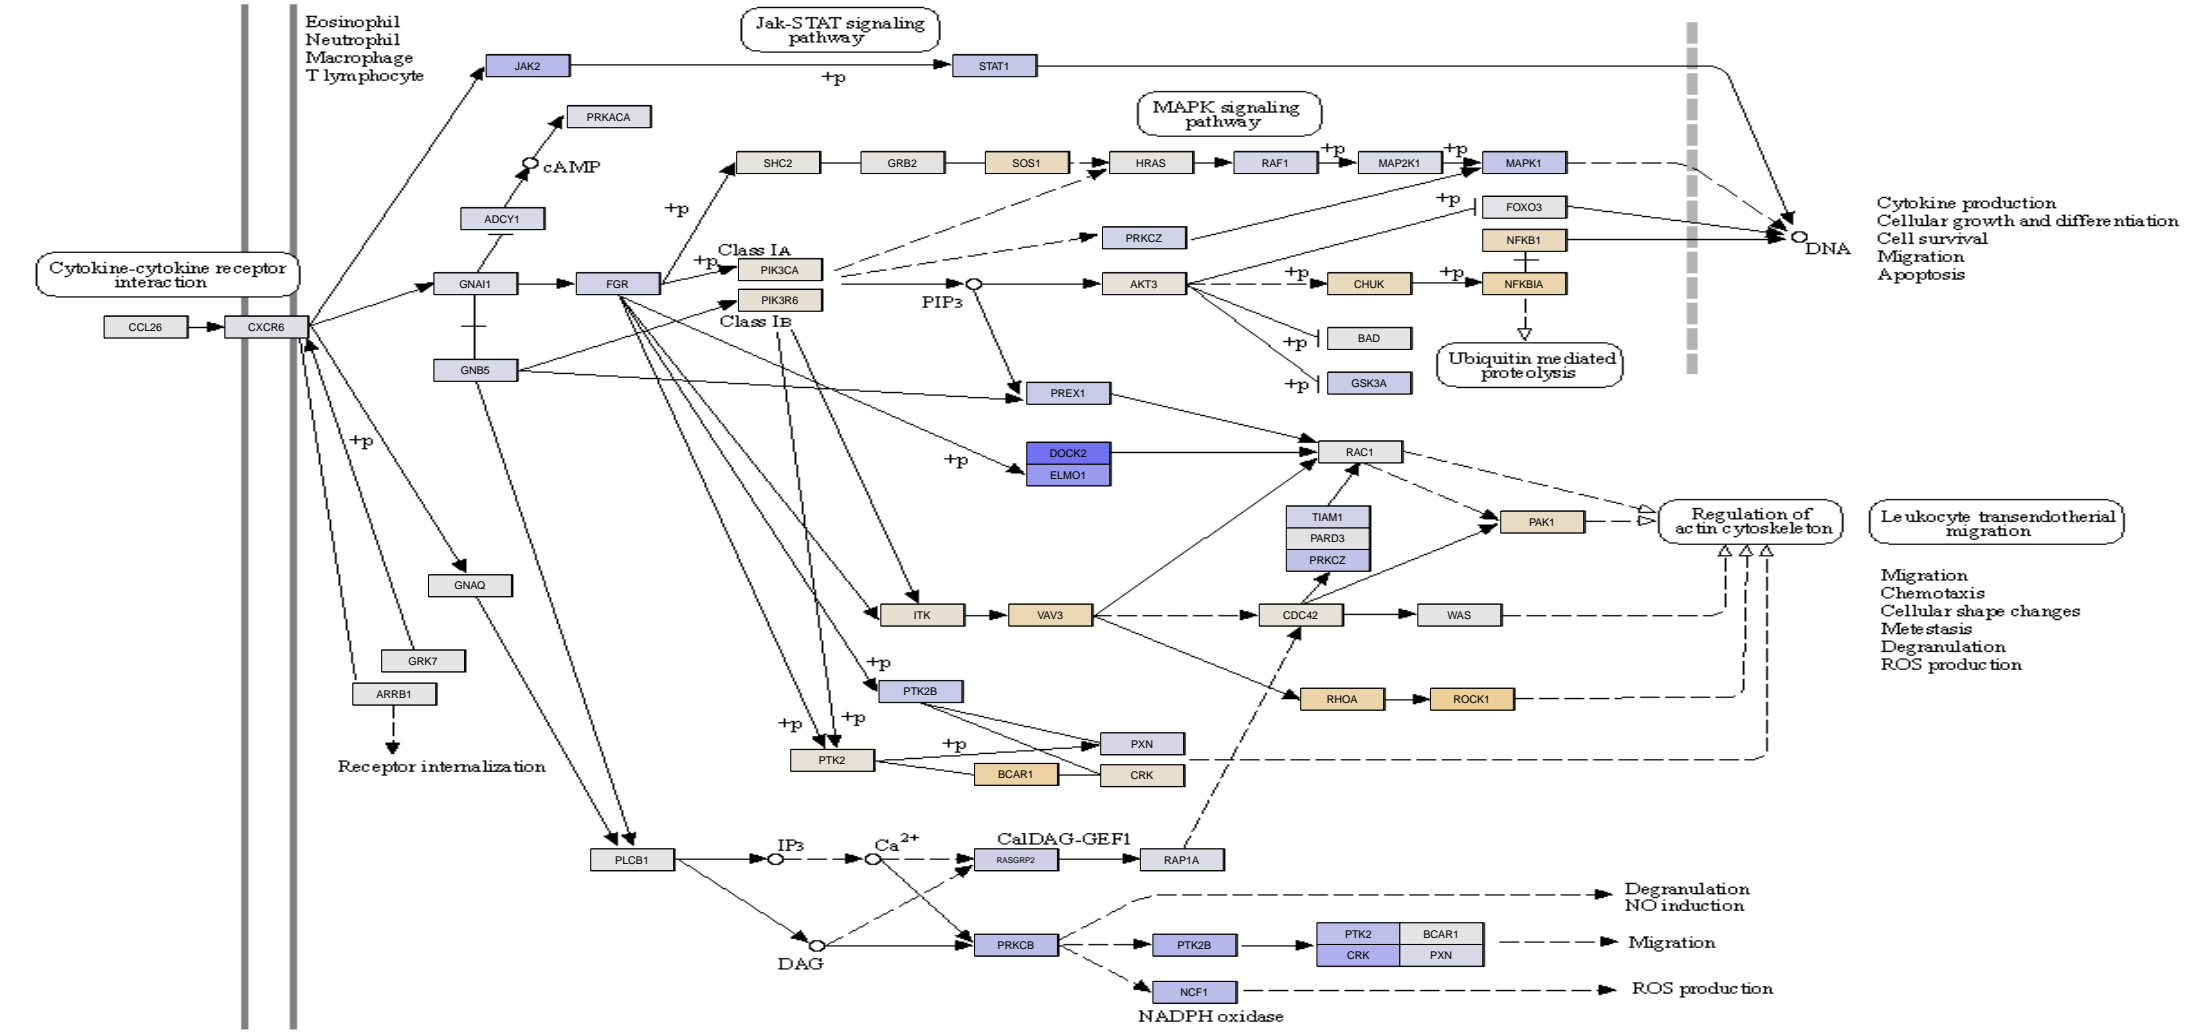

Chemokine signaling pathway  
Infant

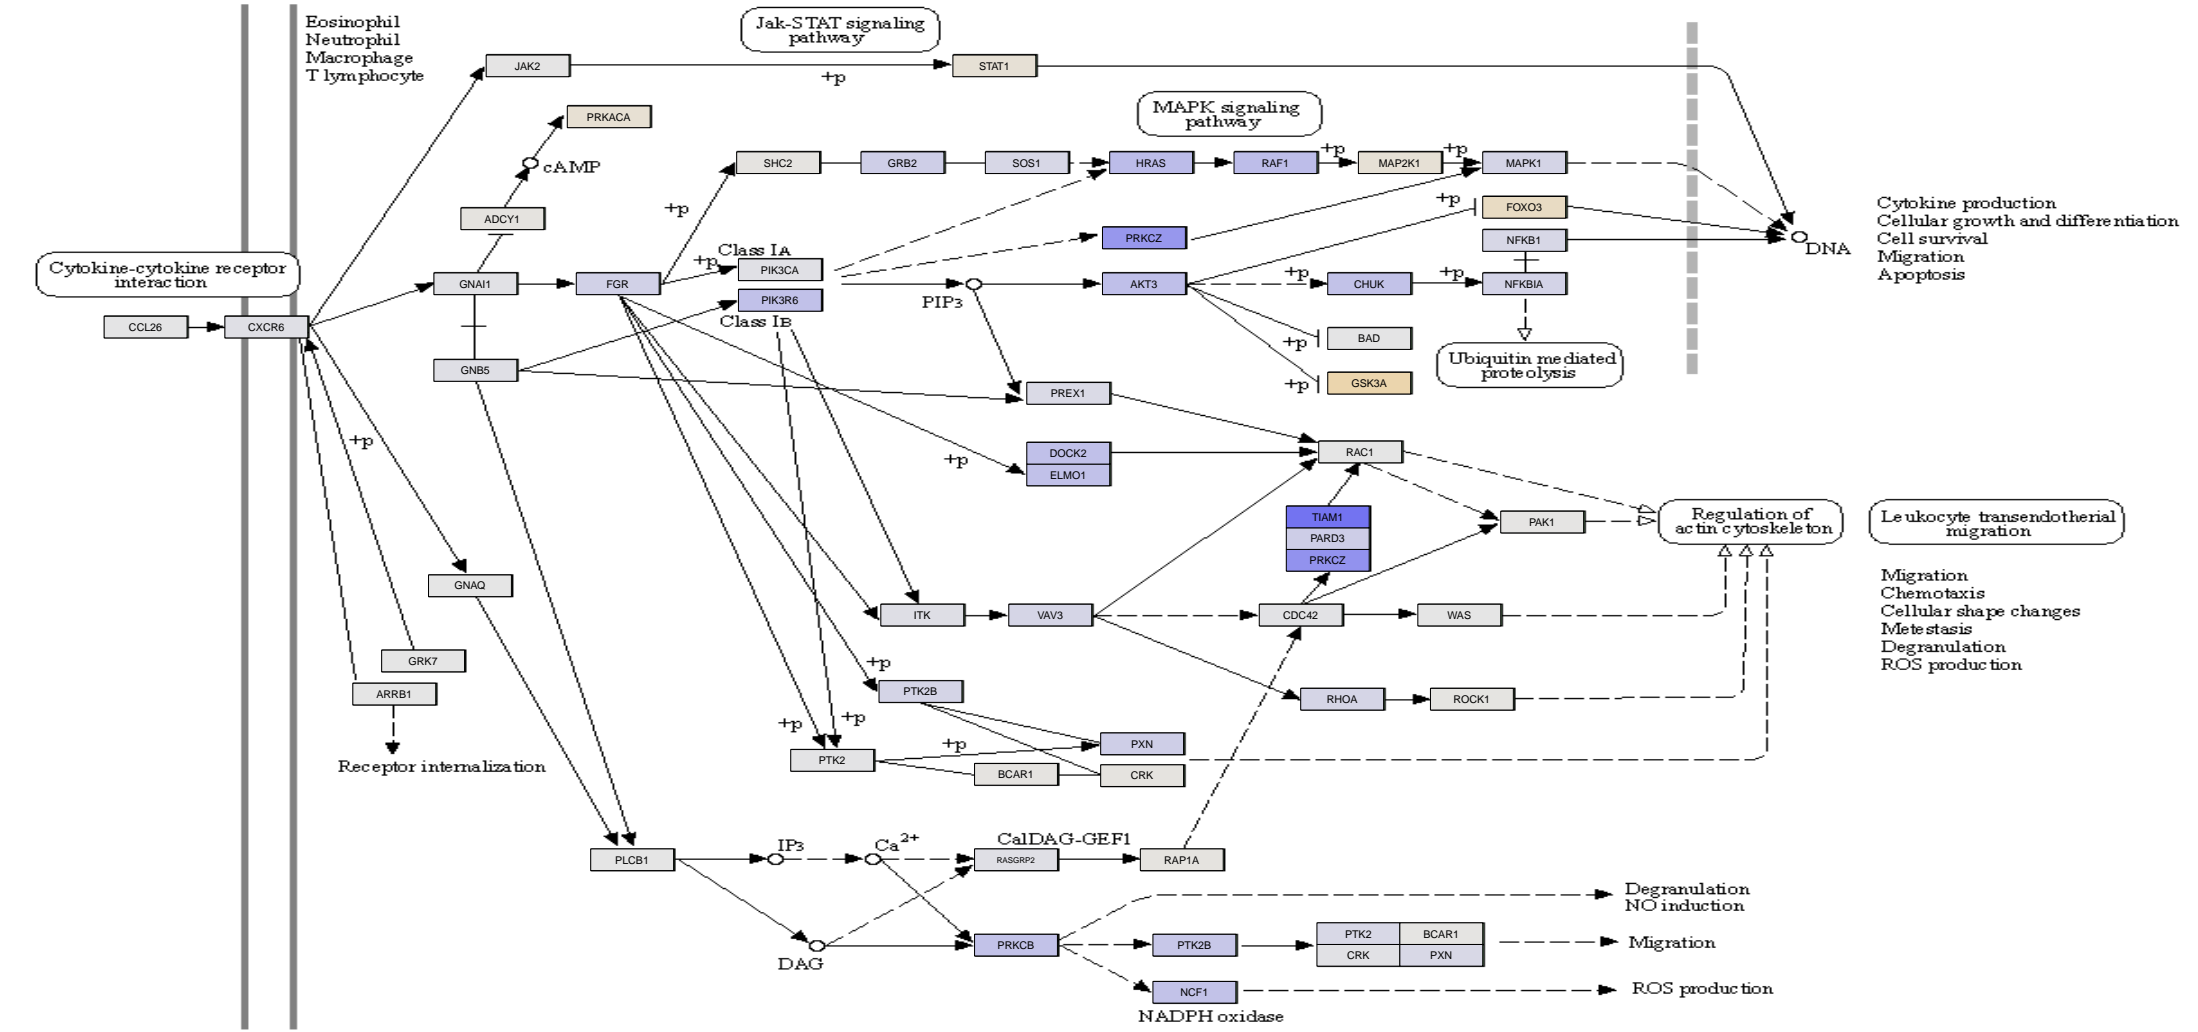

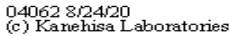







Supplement: s1 [file s1]
