# Supplementary material for: The Transcriptome and Methylome of the Developing and Aging Brain and Their Relations to Gliomas and Psychological Disorders
Source: MDPI journal article supplement (doi:10.3390/cells11030362), 2022-01-21

TNF signaling pathway

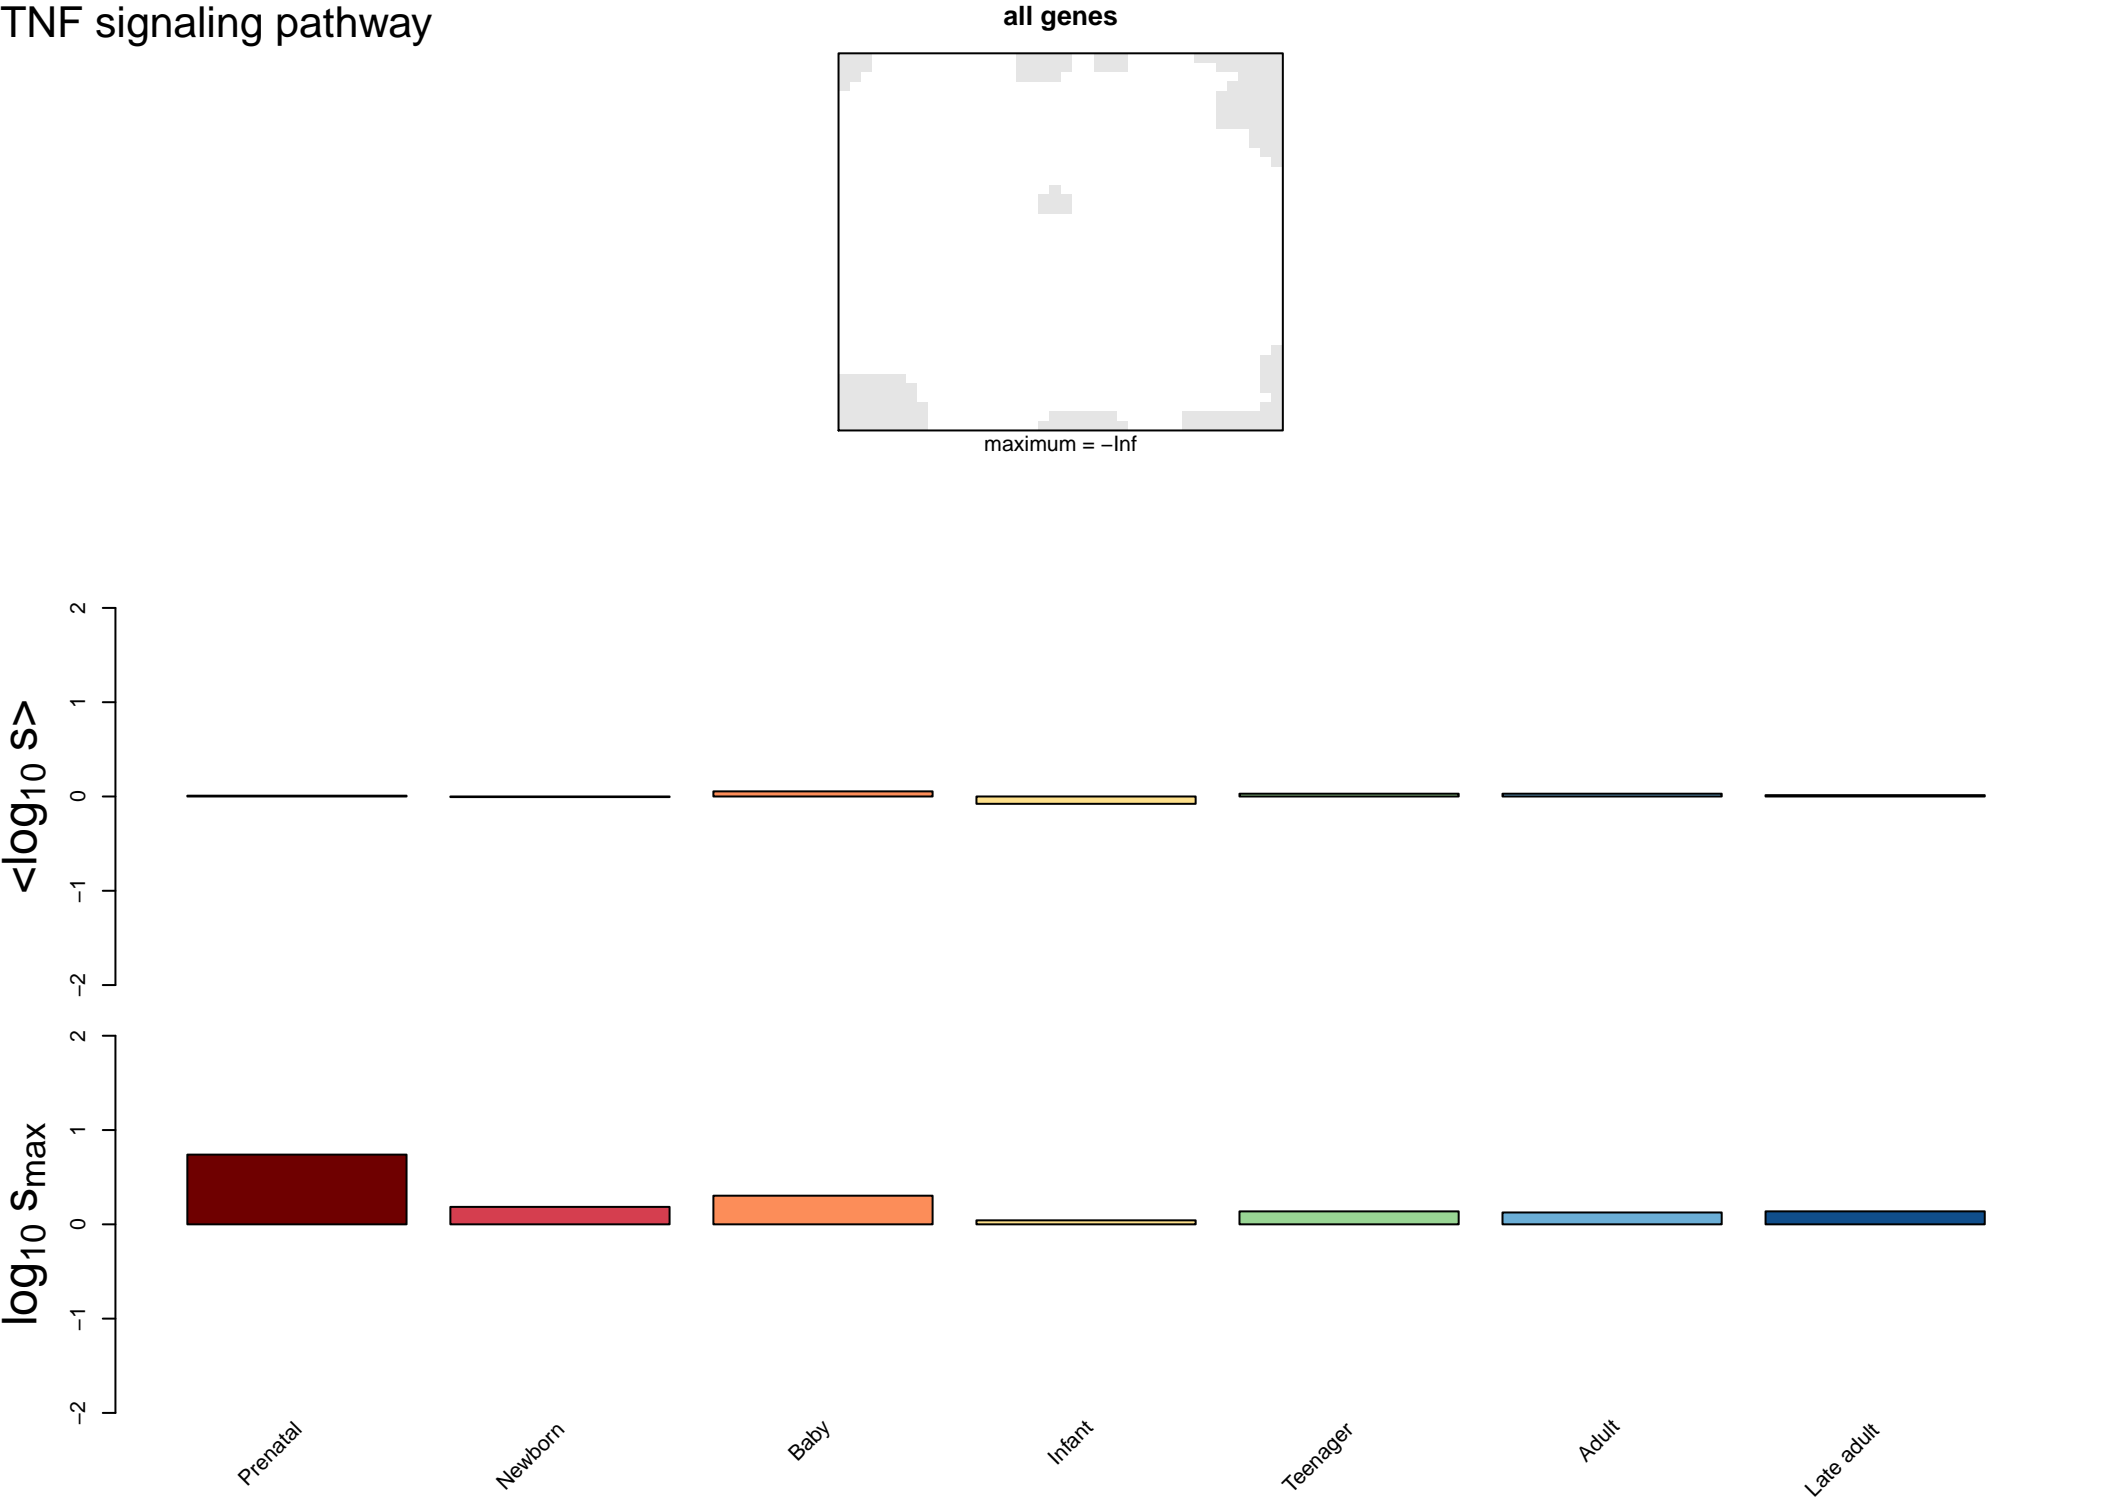

TNF\_signaling\_pathway  
genes with data

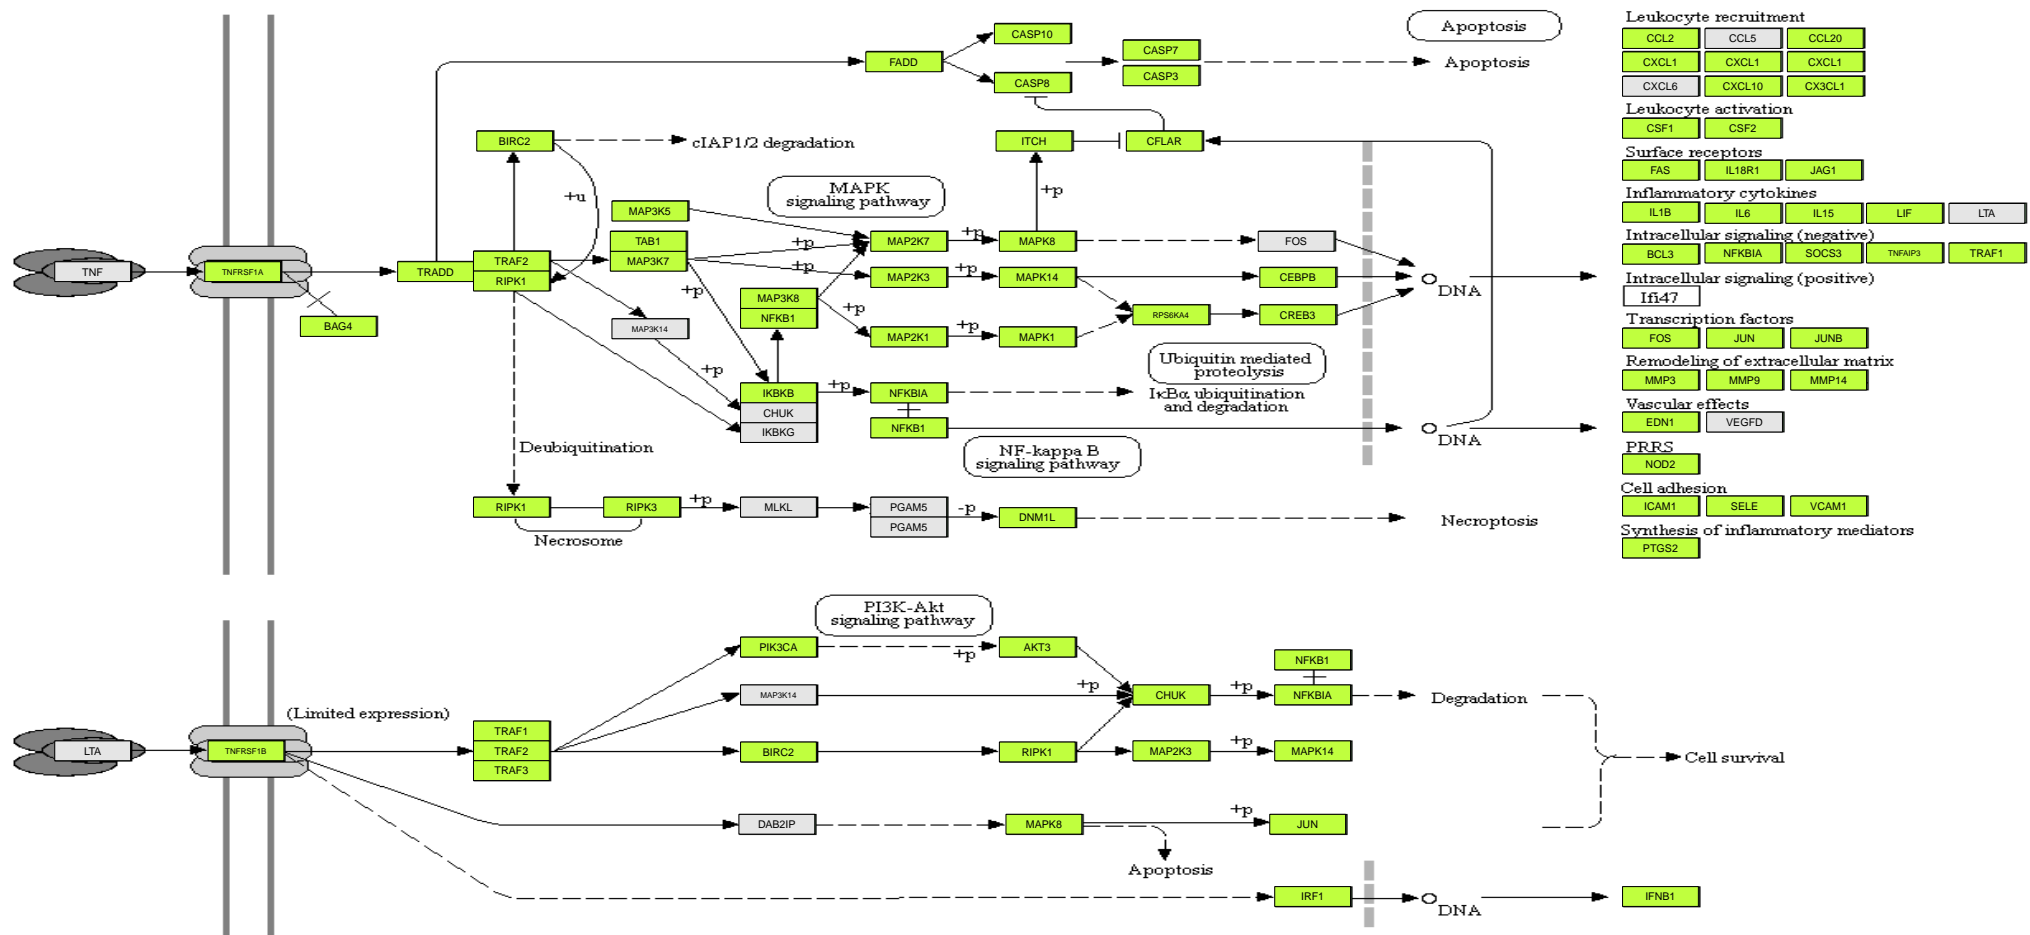

TNF\_signaling\_pathway  
sink nodes

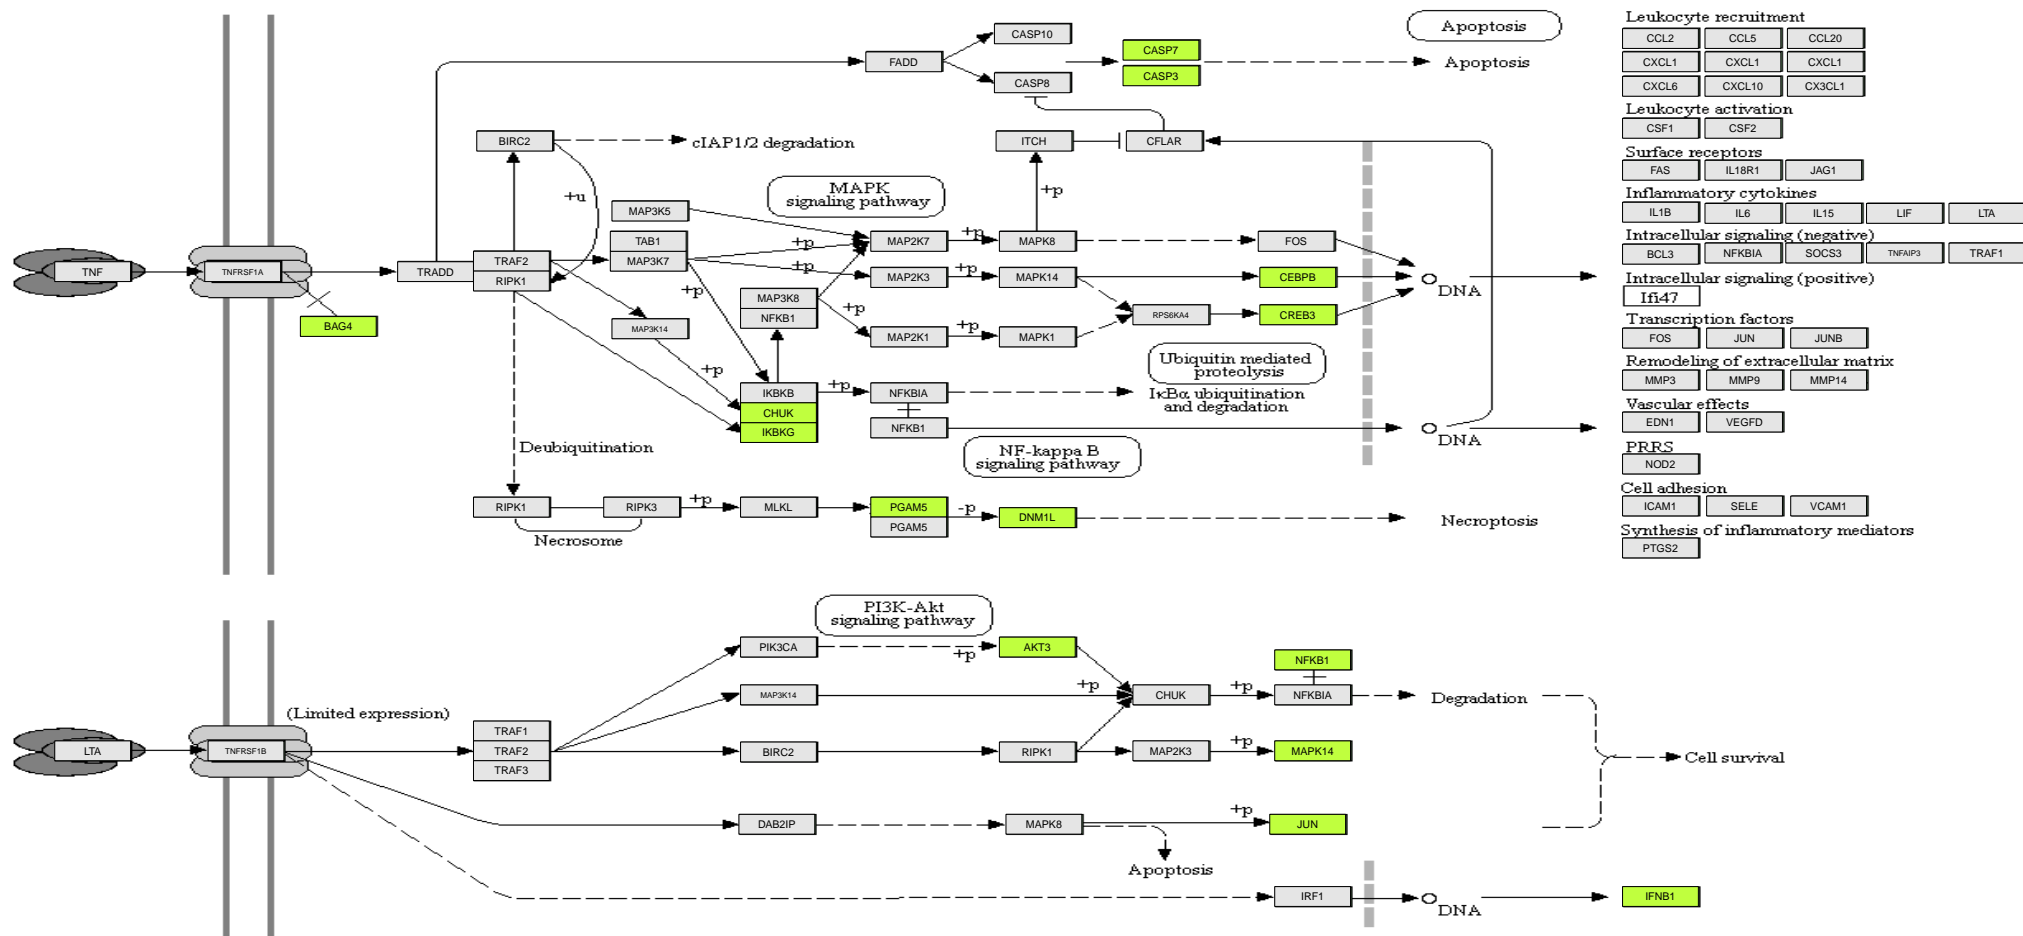

TNF\_signaling\_pathway  
Prenatal

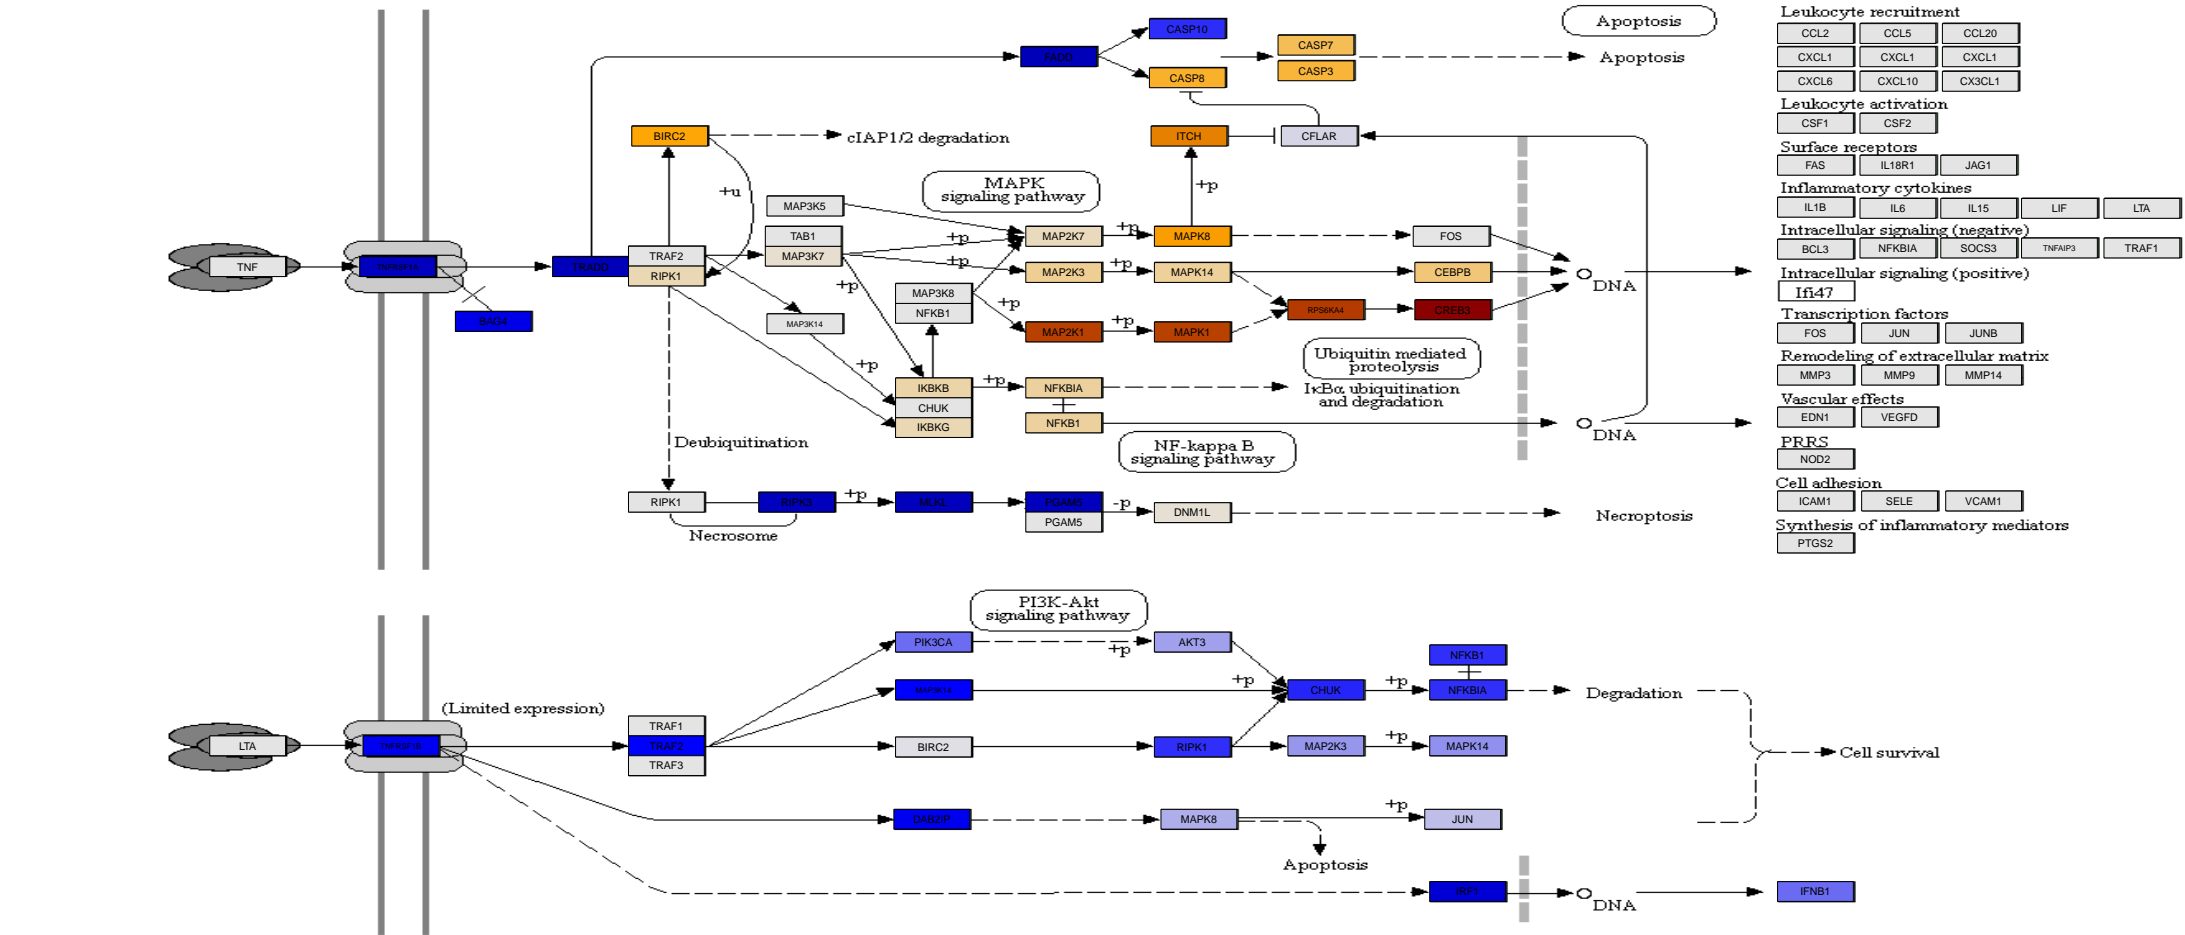

TNF\_signaling\_pathway  
Newborn

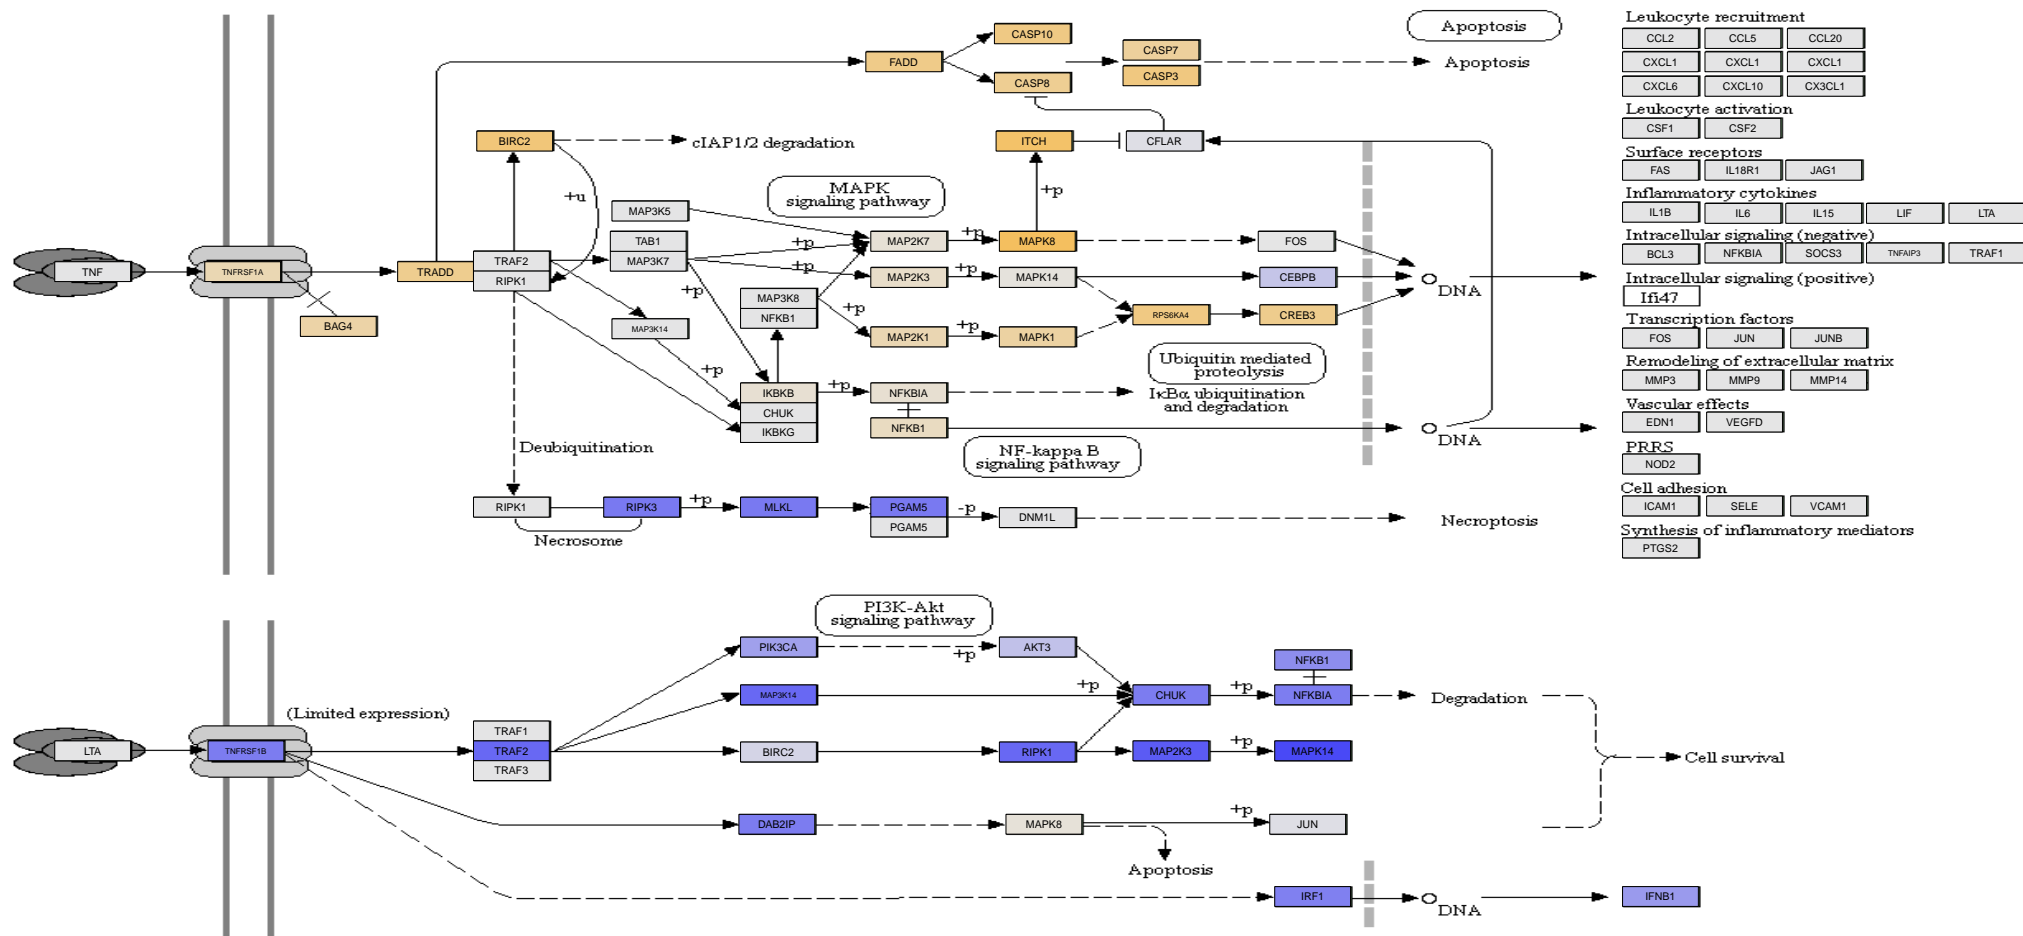

TNF\_signaling\_pathway  
Baby

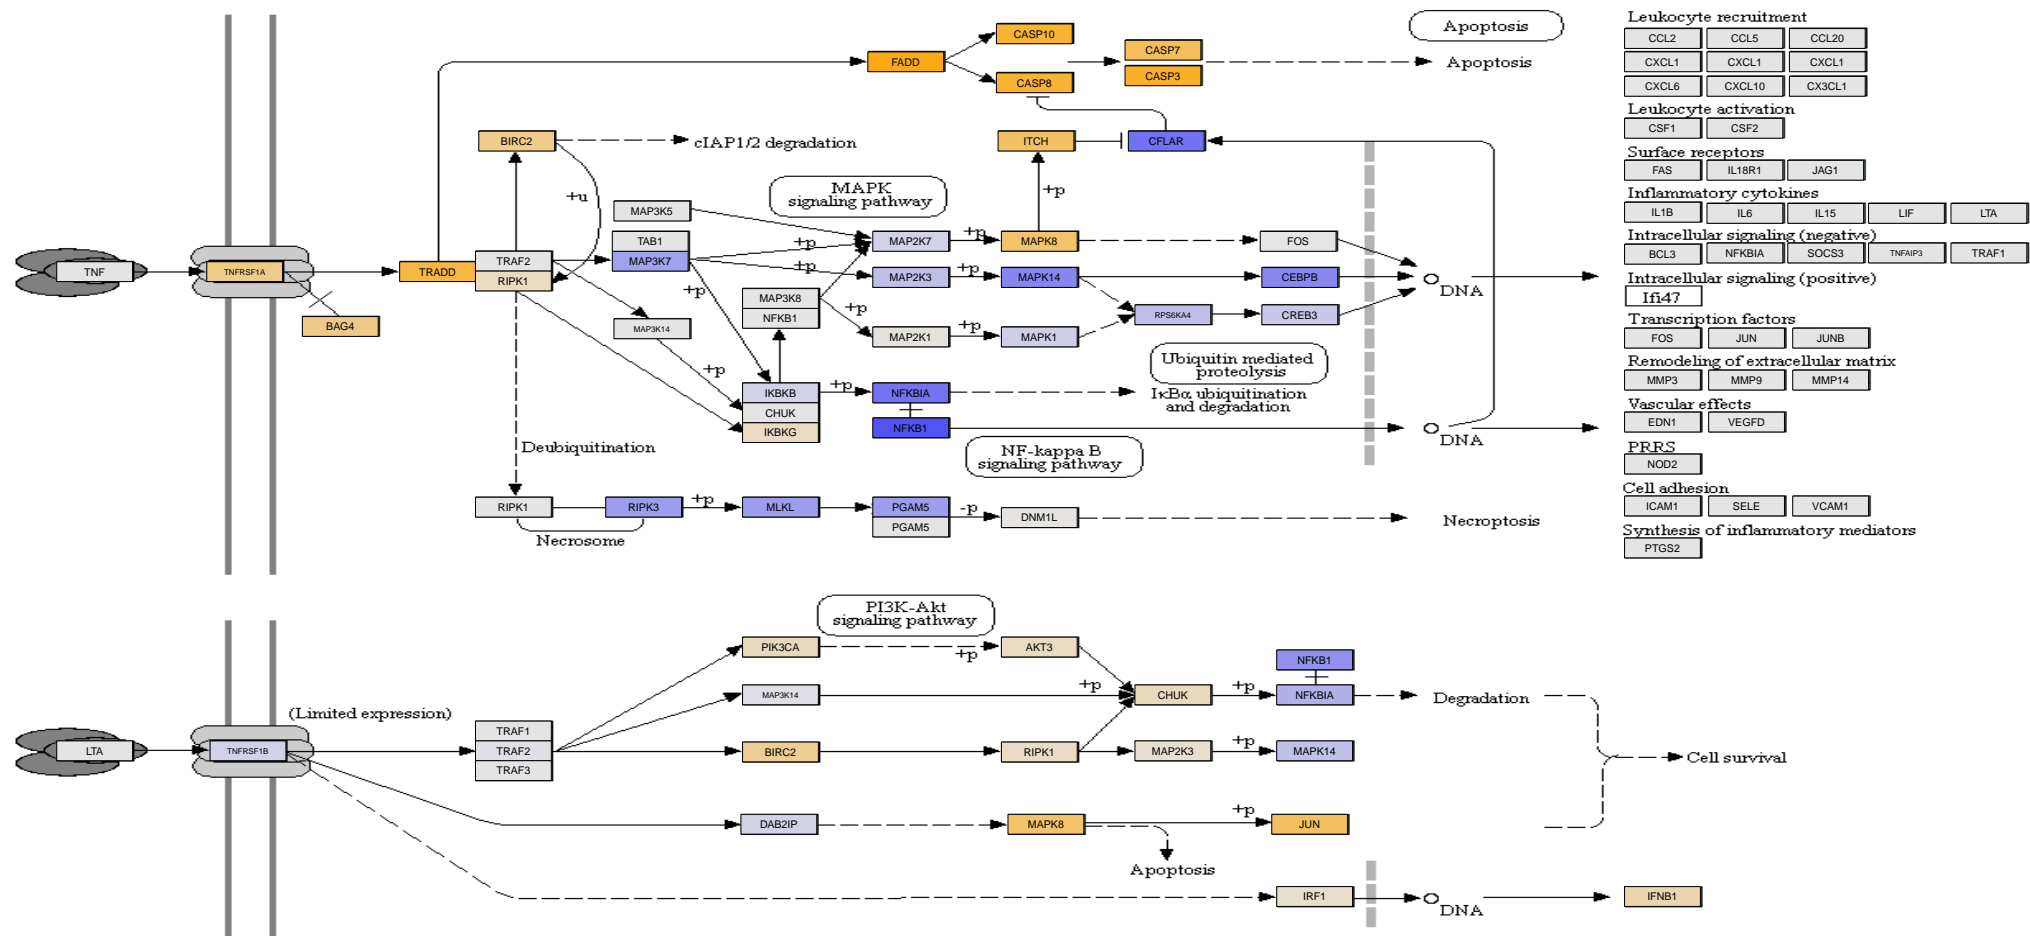

TNF\_signaling\_pathway  
Infant

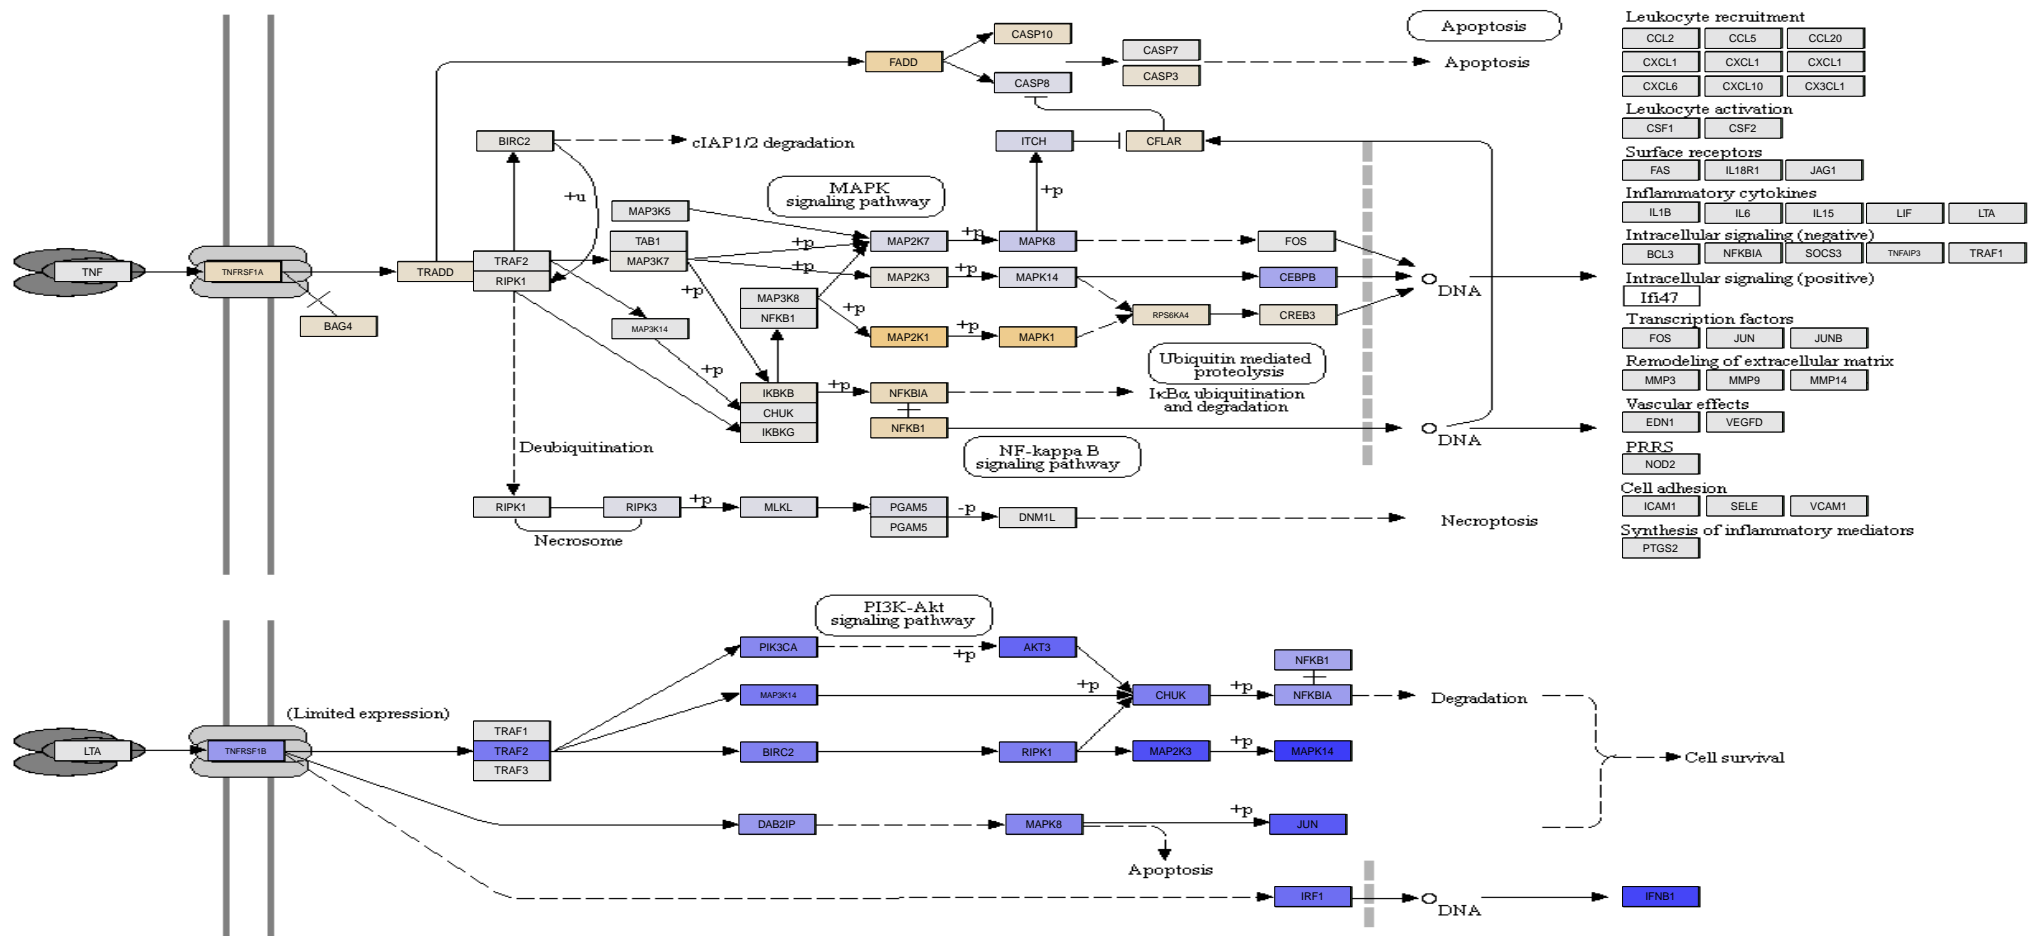

TNF\_signaling\_pathway

Teenager

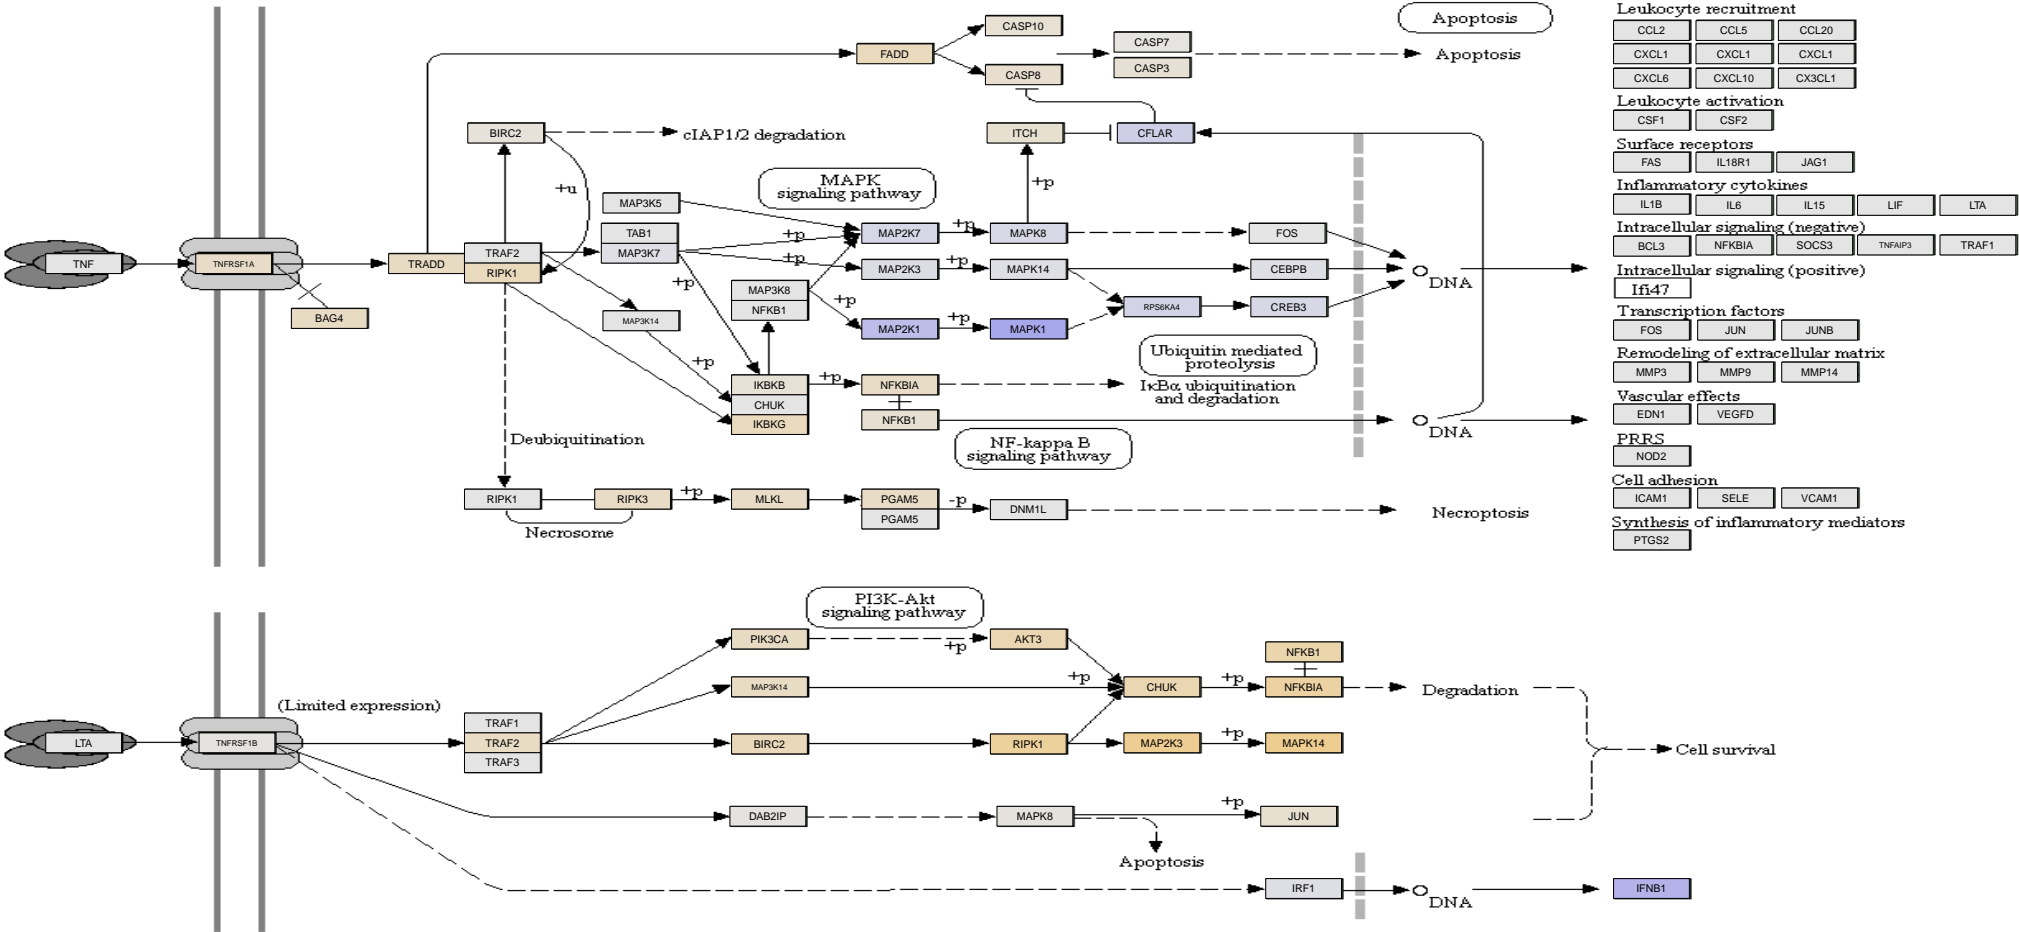



TNF\_signaling\_pathway  
Adult

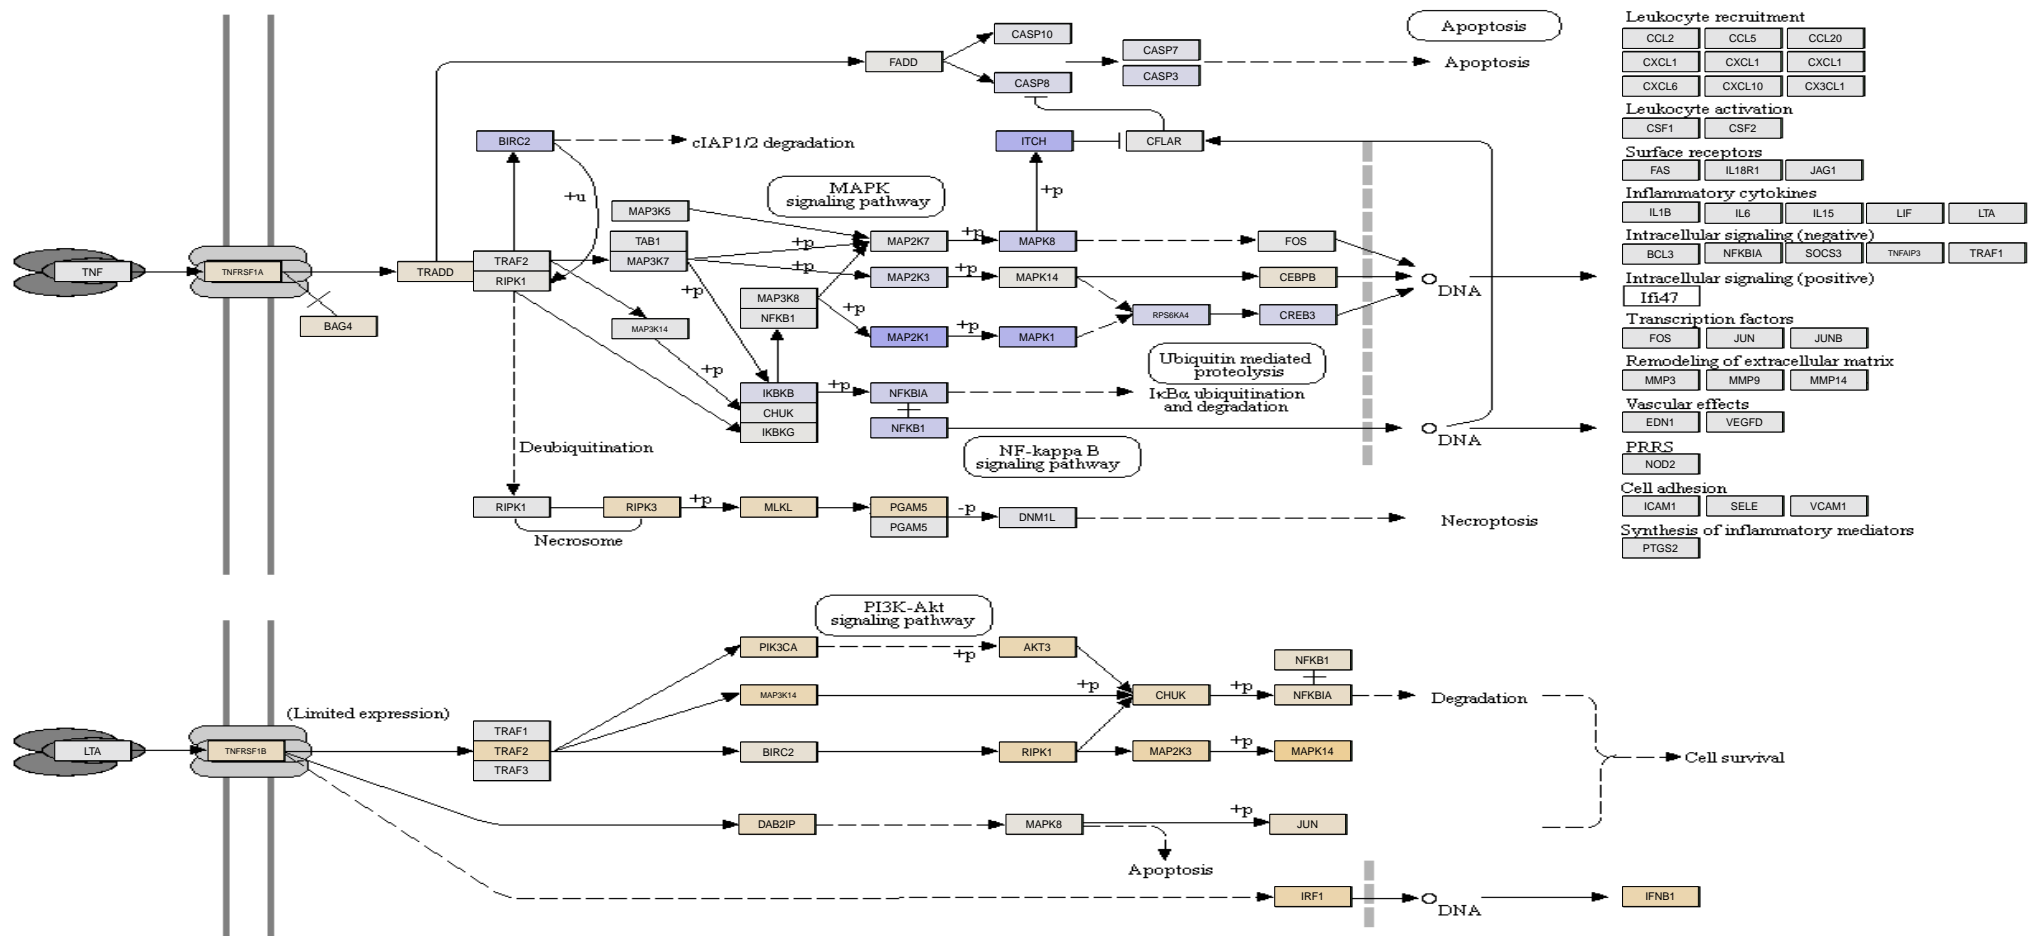

TNF\_signaling\_pathway  
Late adult

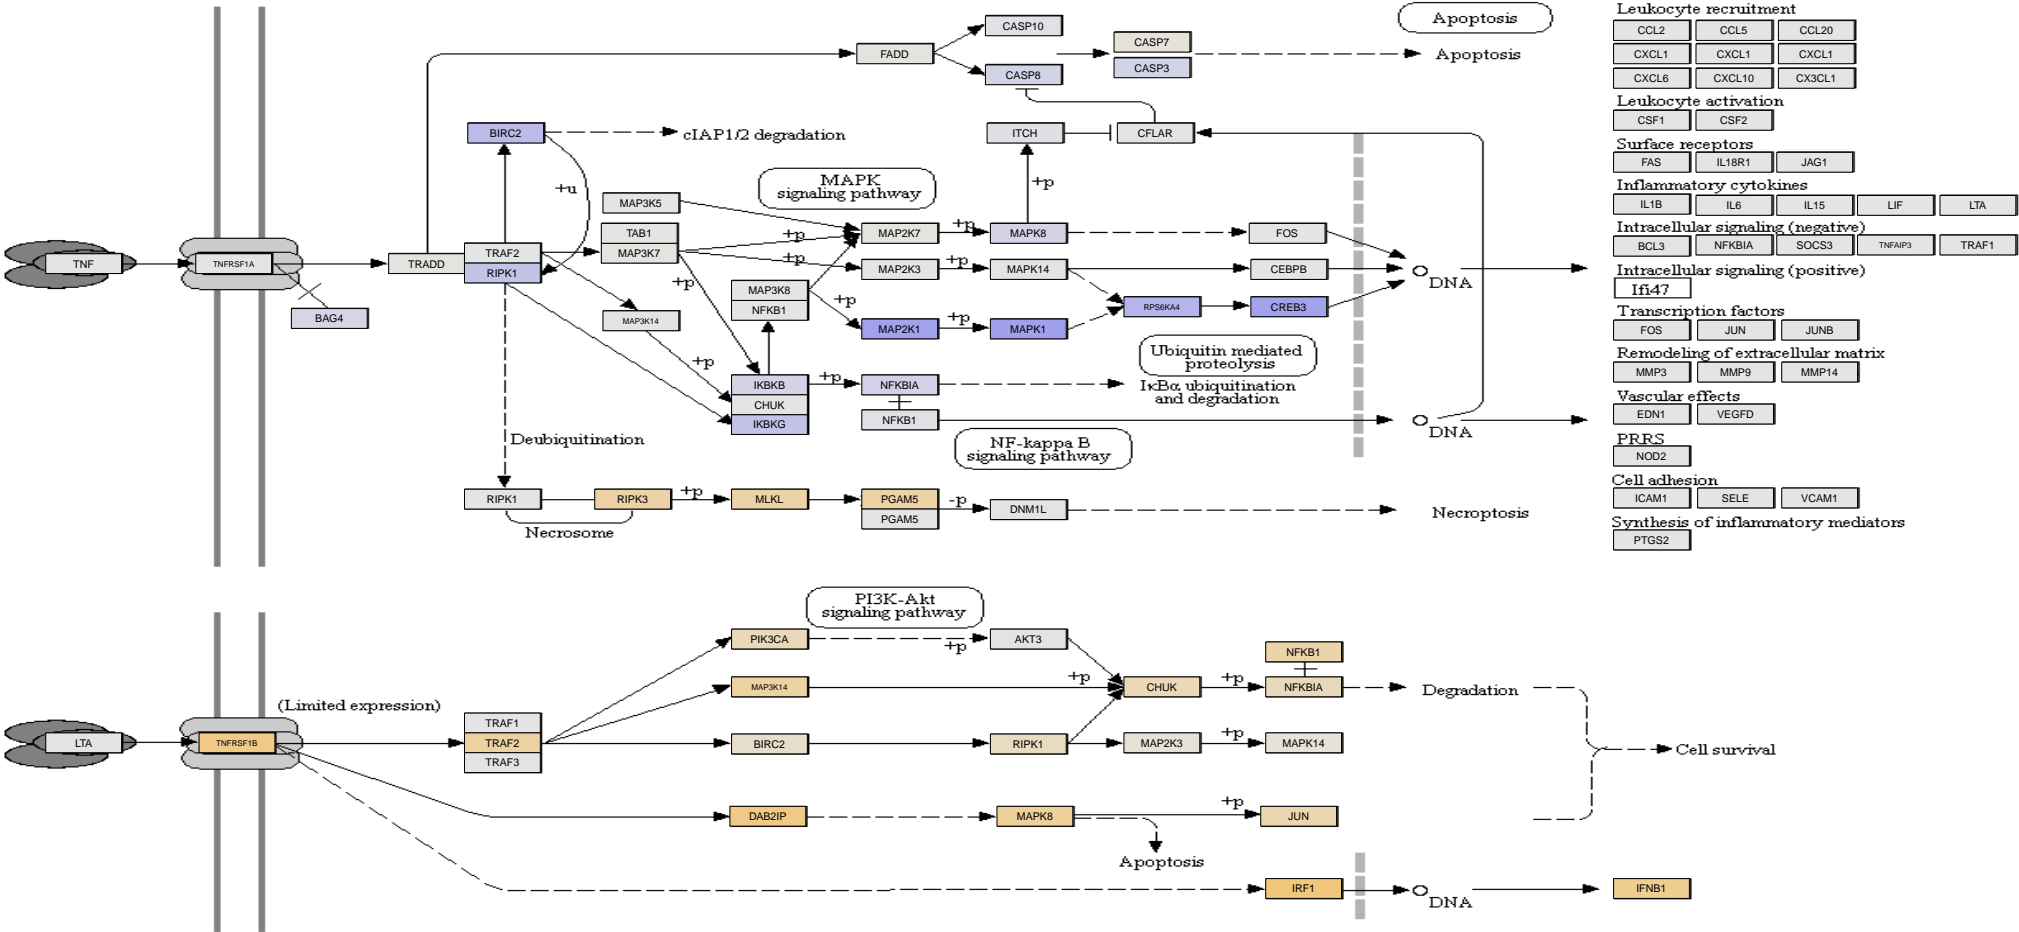

Supplement: s1 [file s1]
