# Supplementary material for: The Transcriptome and Methylome of the Developing and Aging Brain and Their Relations to Gliomas and Psychological Disorders
Source: MDPI journal article supplement (doi:10.3390/cells11030362), 2022-01-21

ErbB signaling pathway

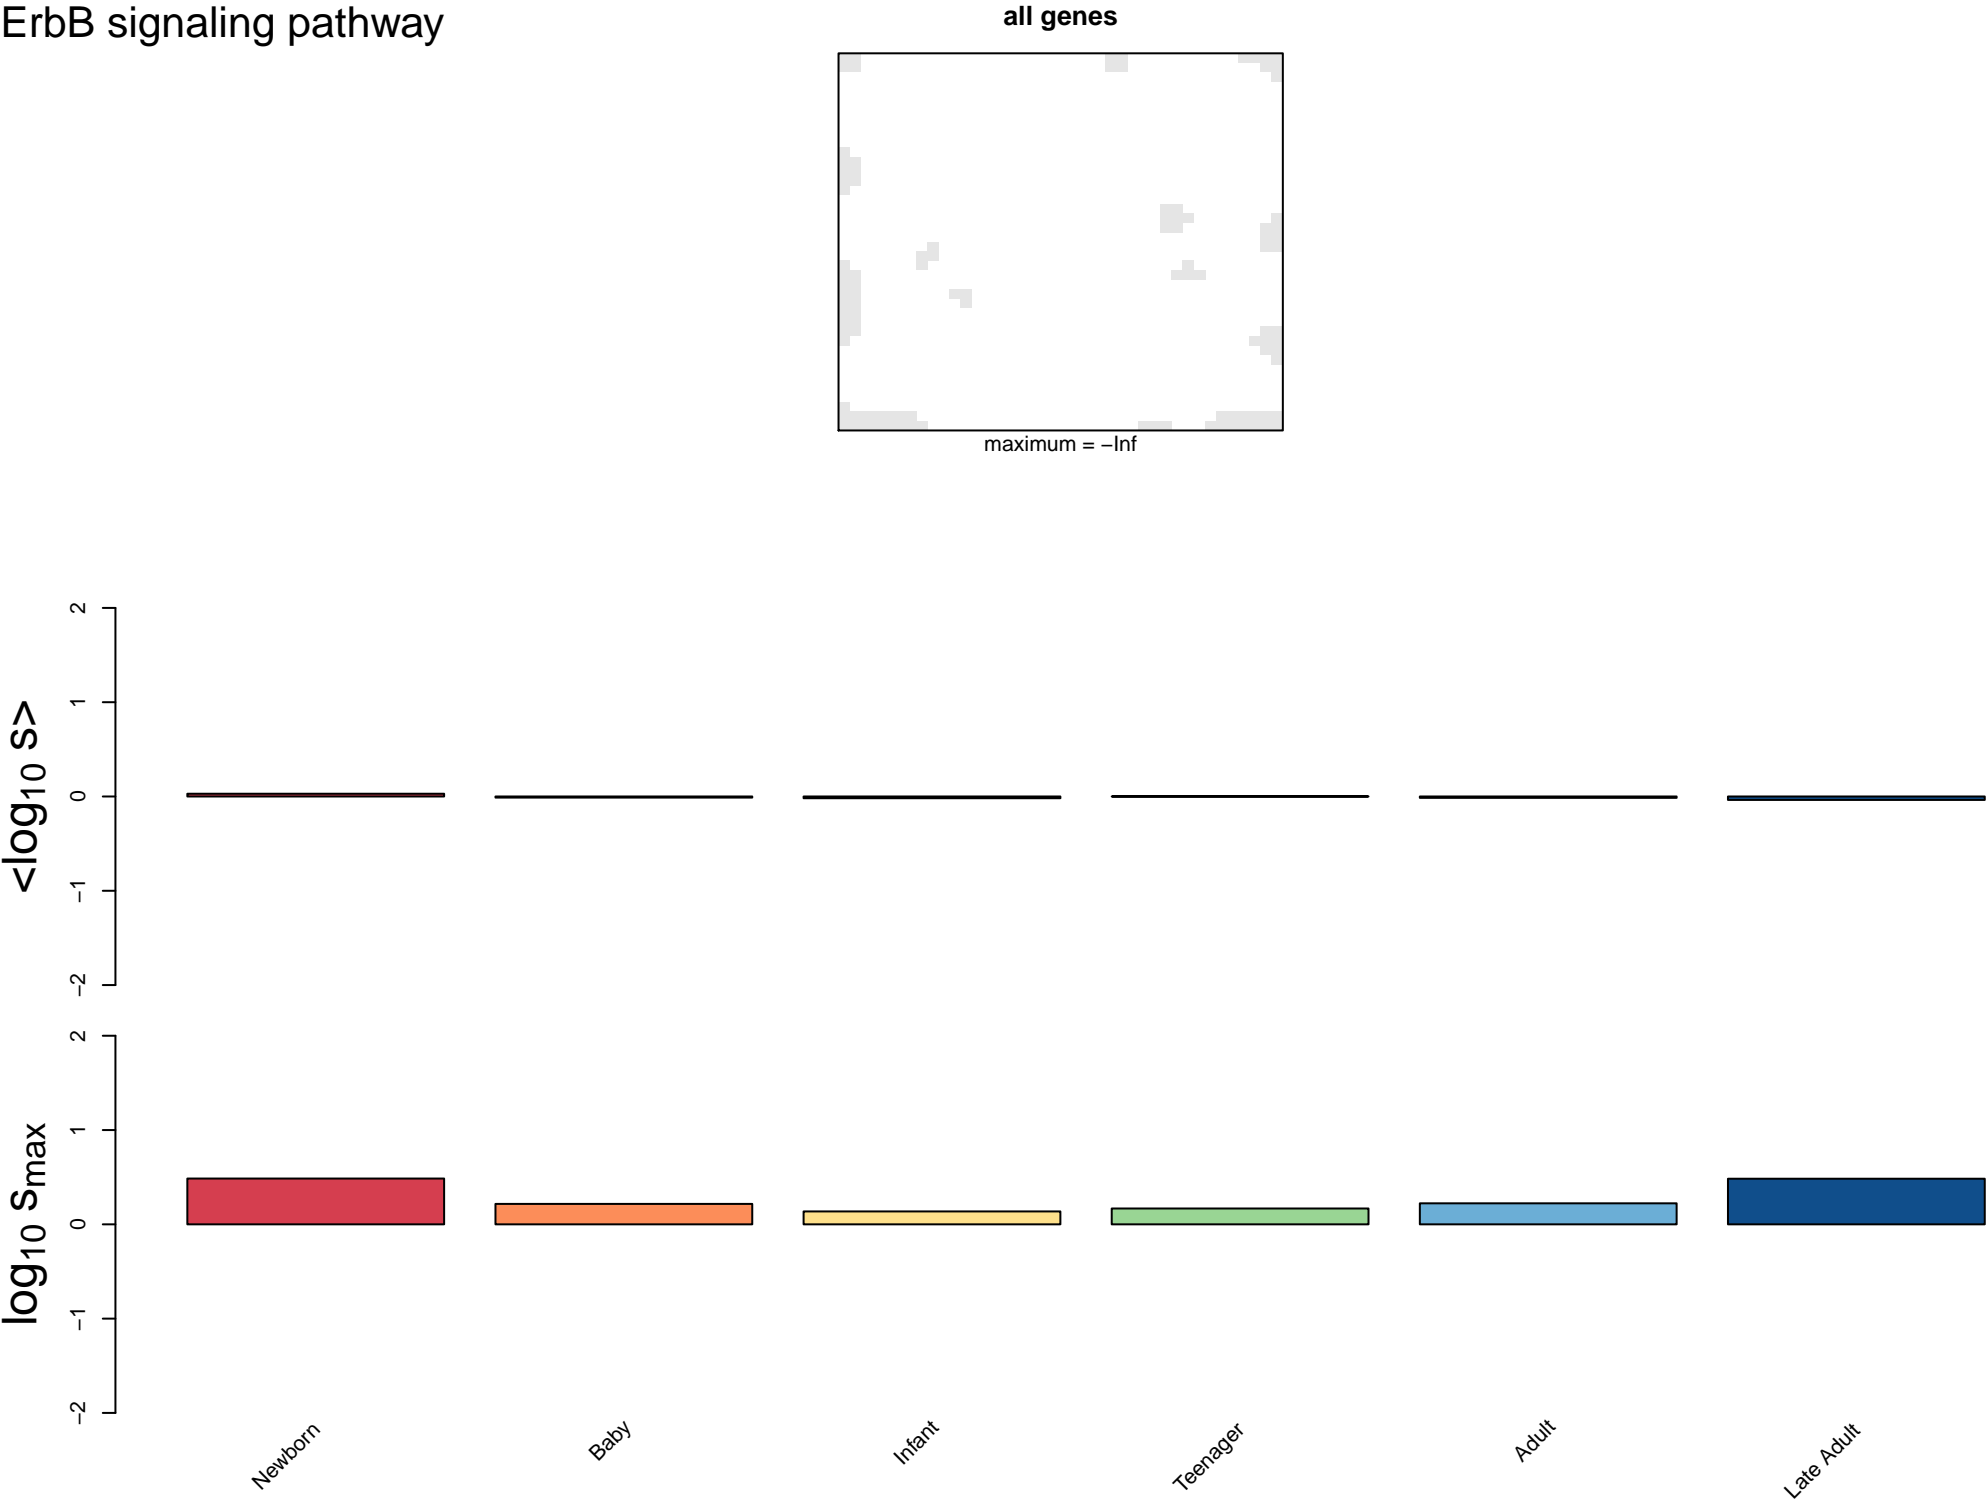

ErbB\_signaling\_pathway  
genes with data

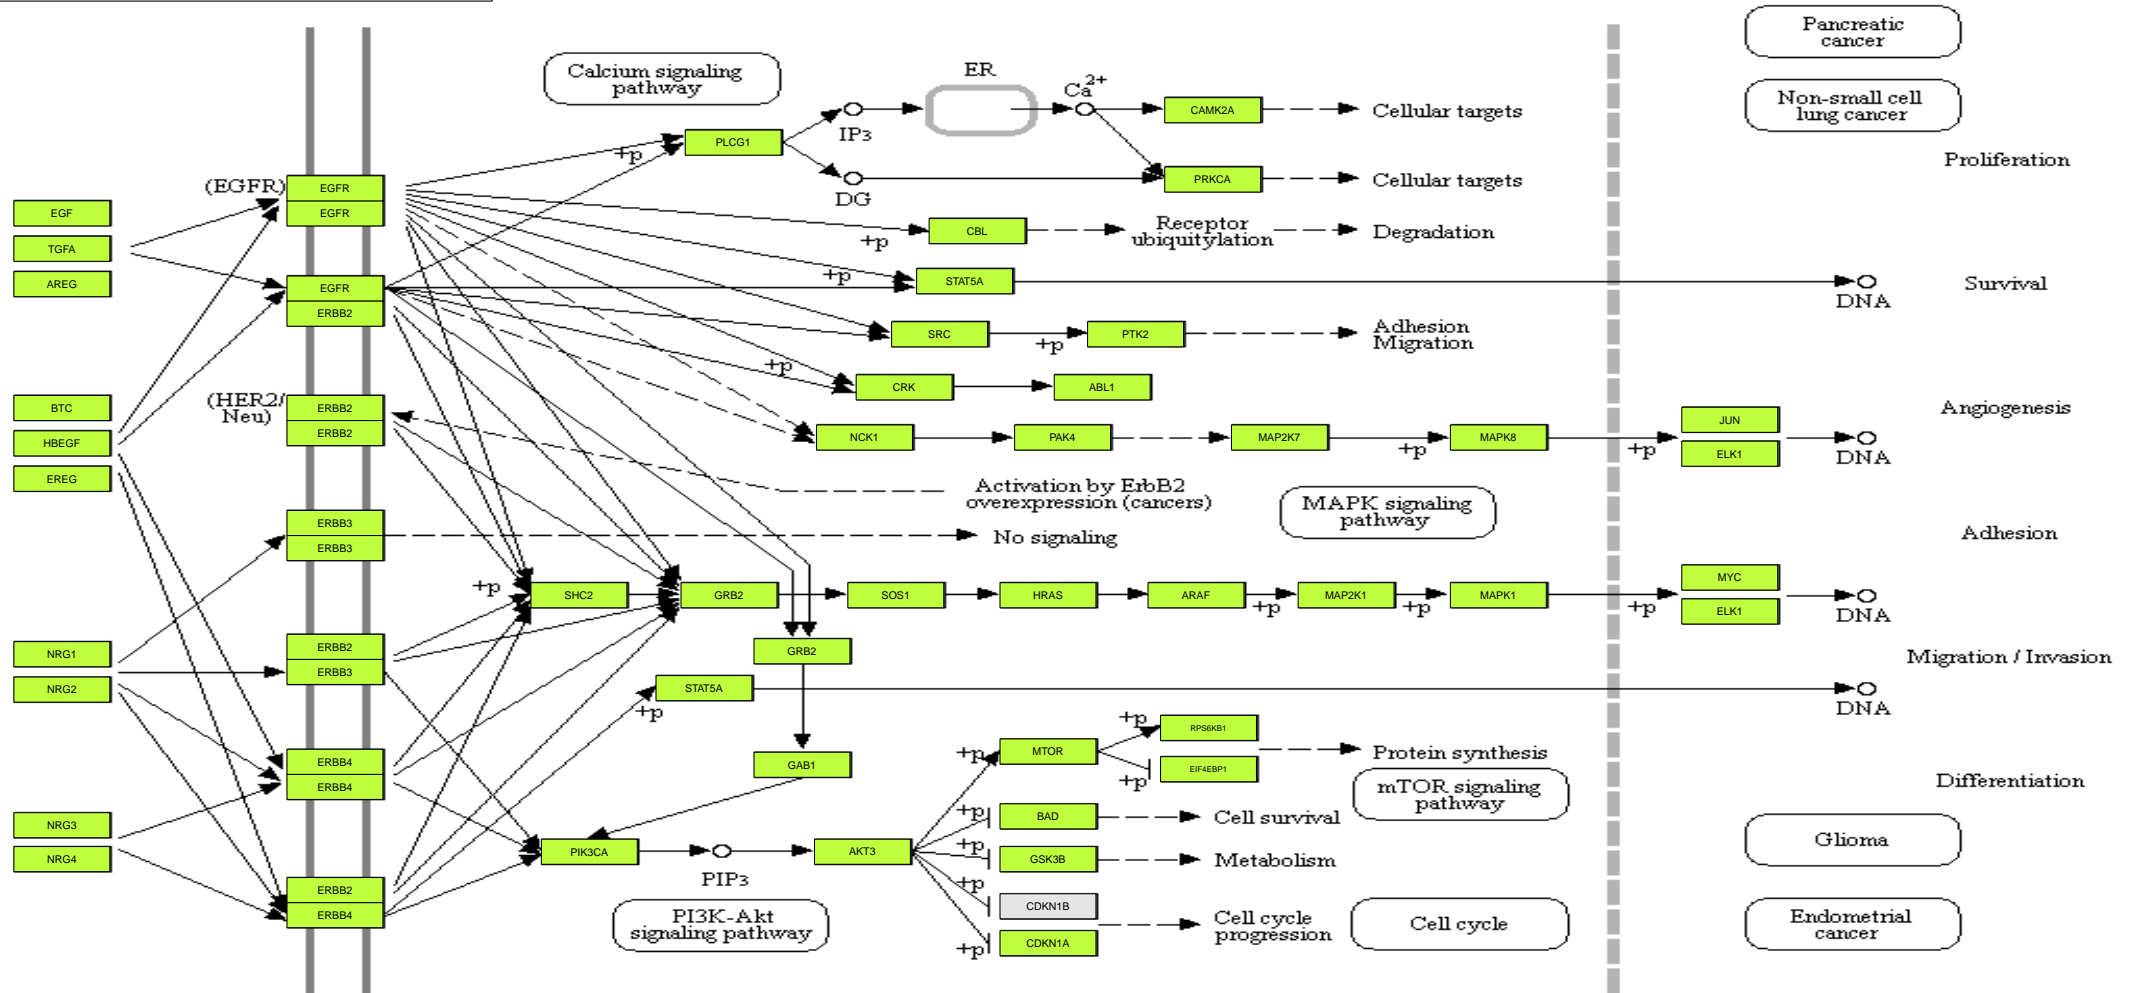

ErbB\_signaling\_pathway  
sink nodes

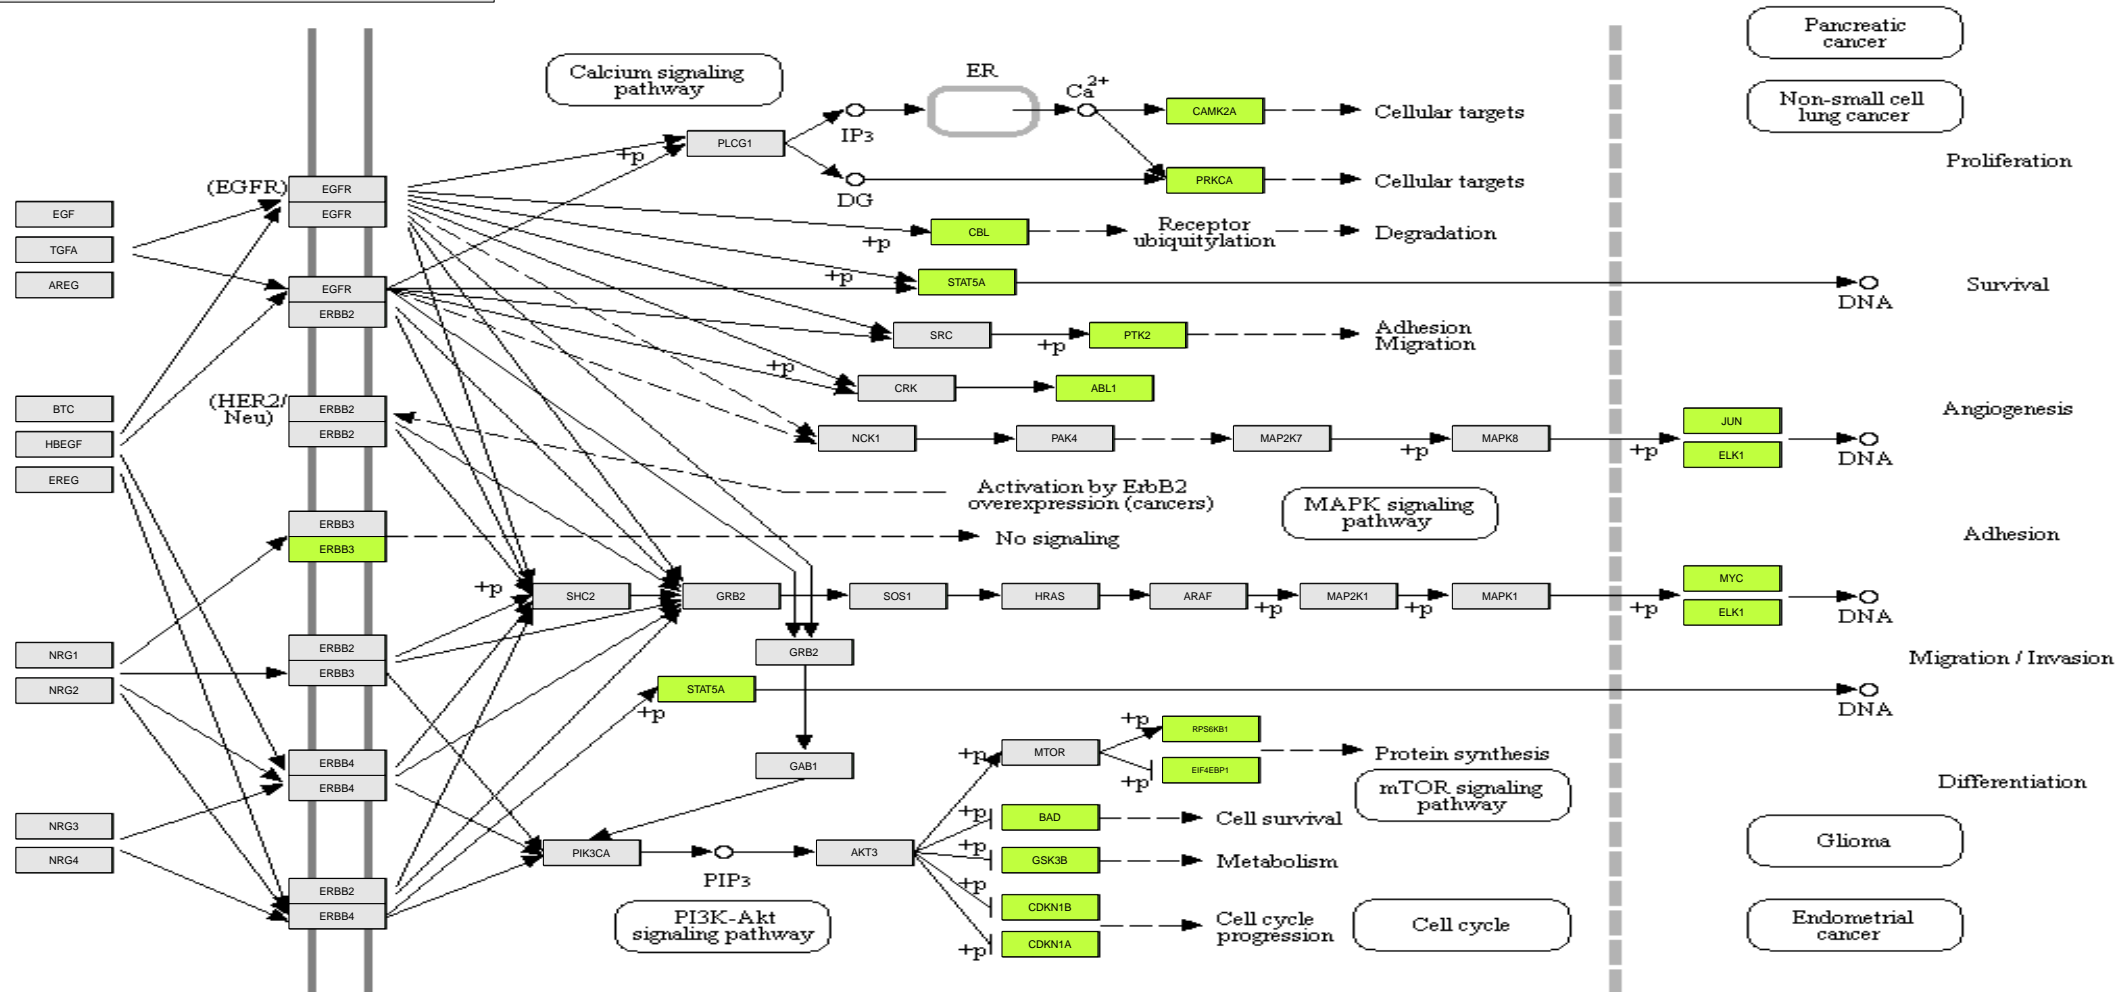

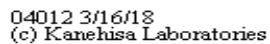

ErbB\_signaling\_pathway  
Baby

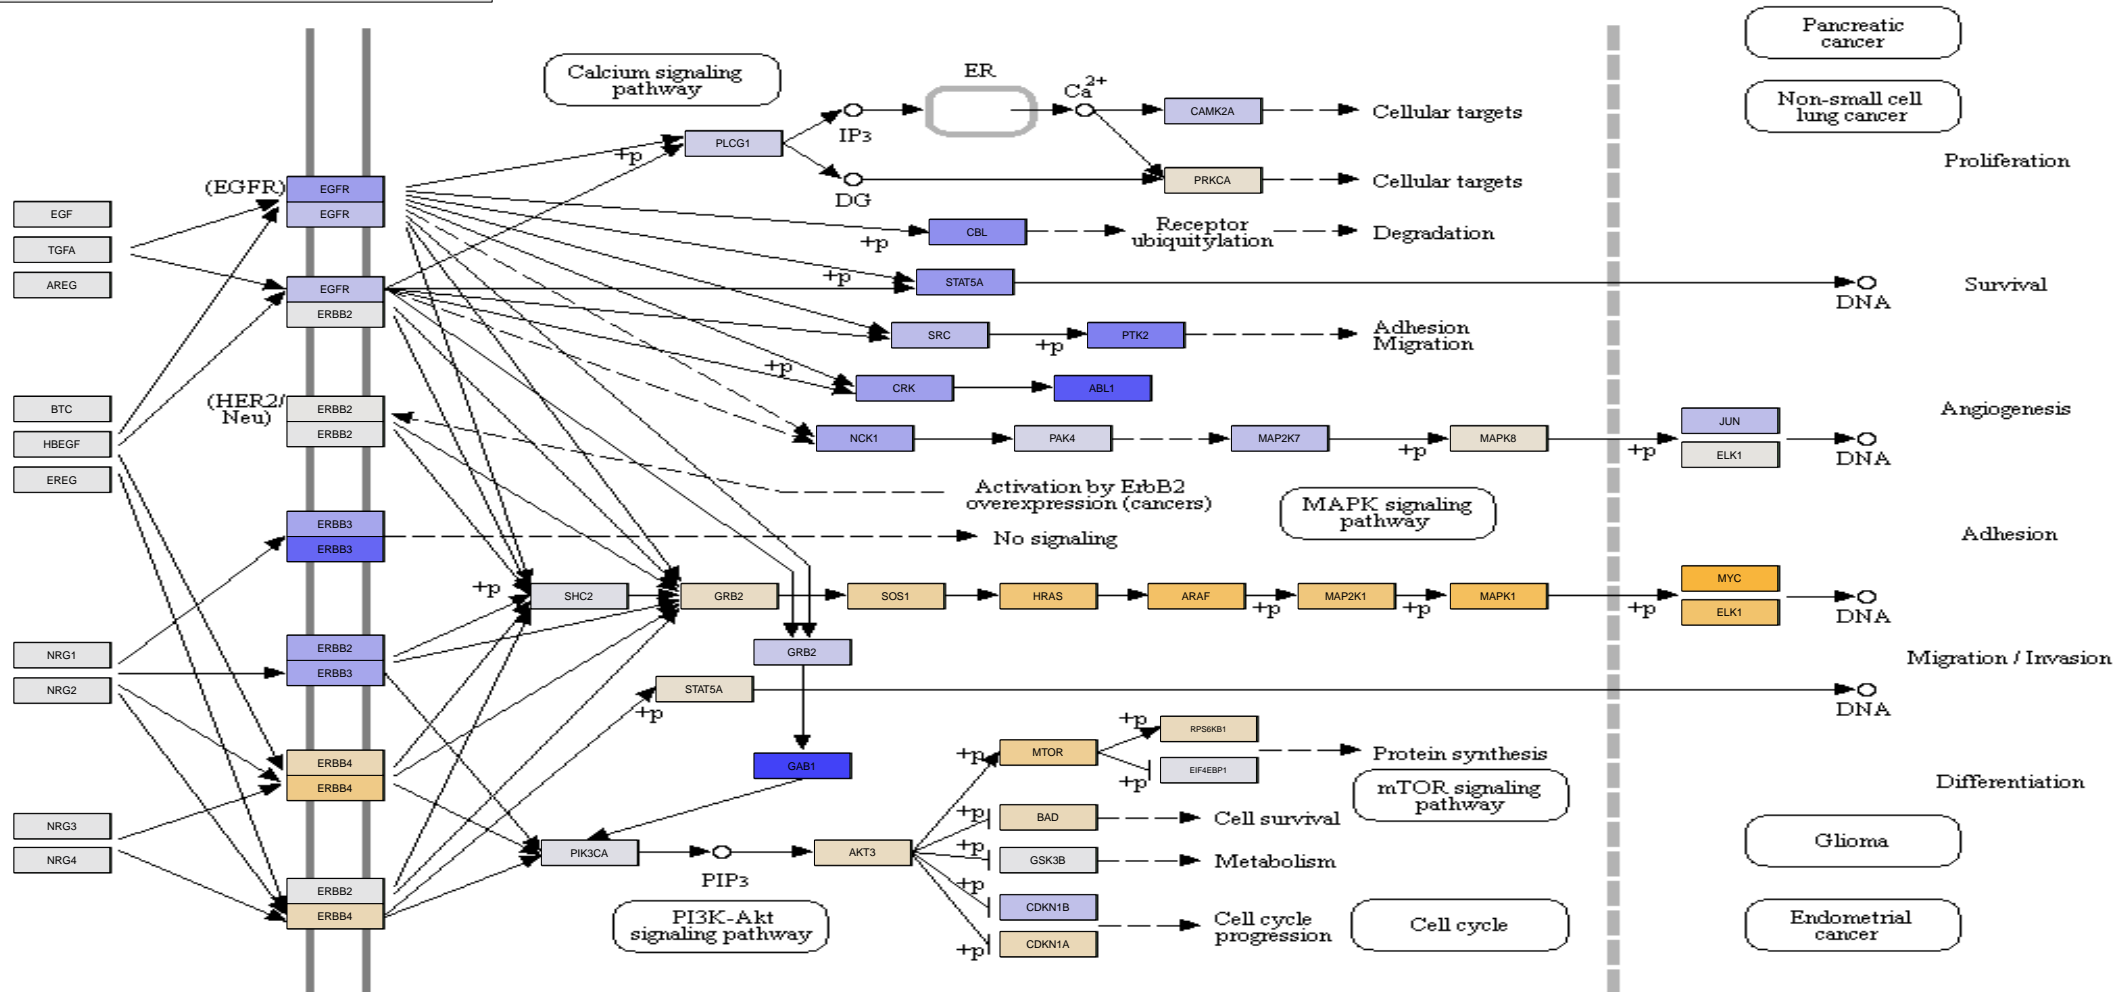

ErbB\_signaling\_pathway  
Infant

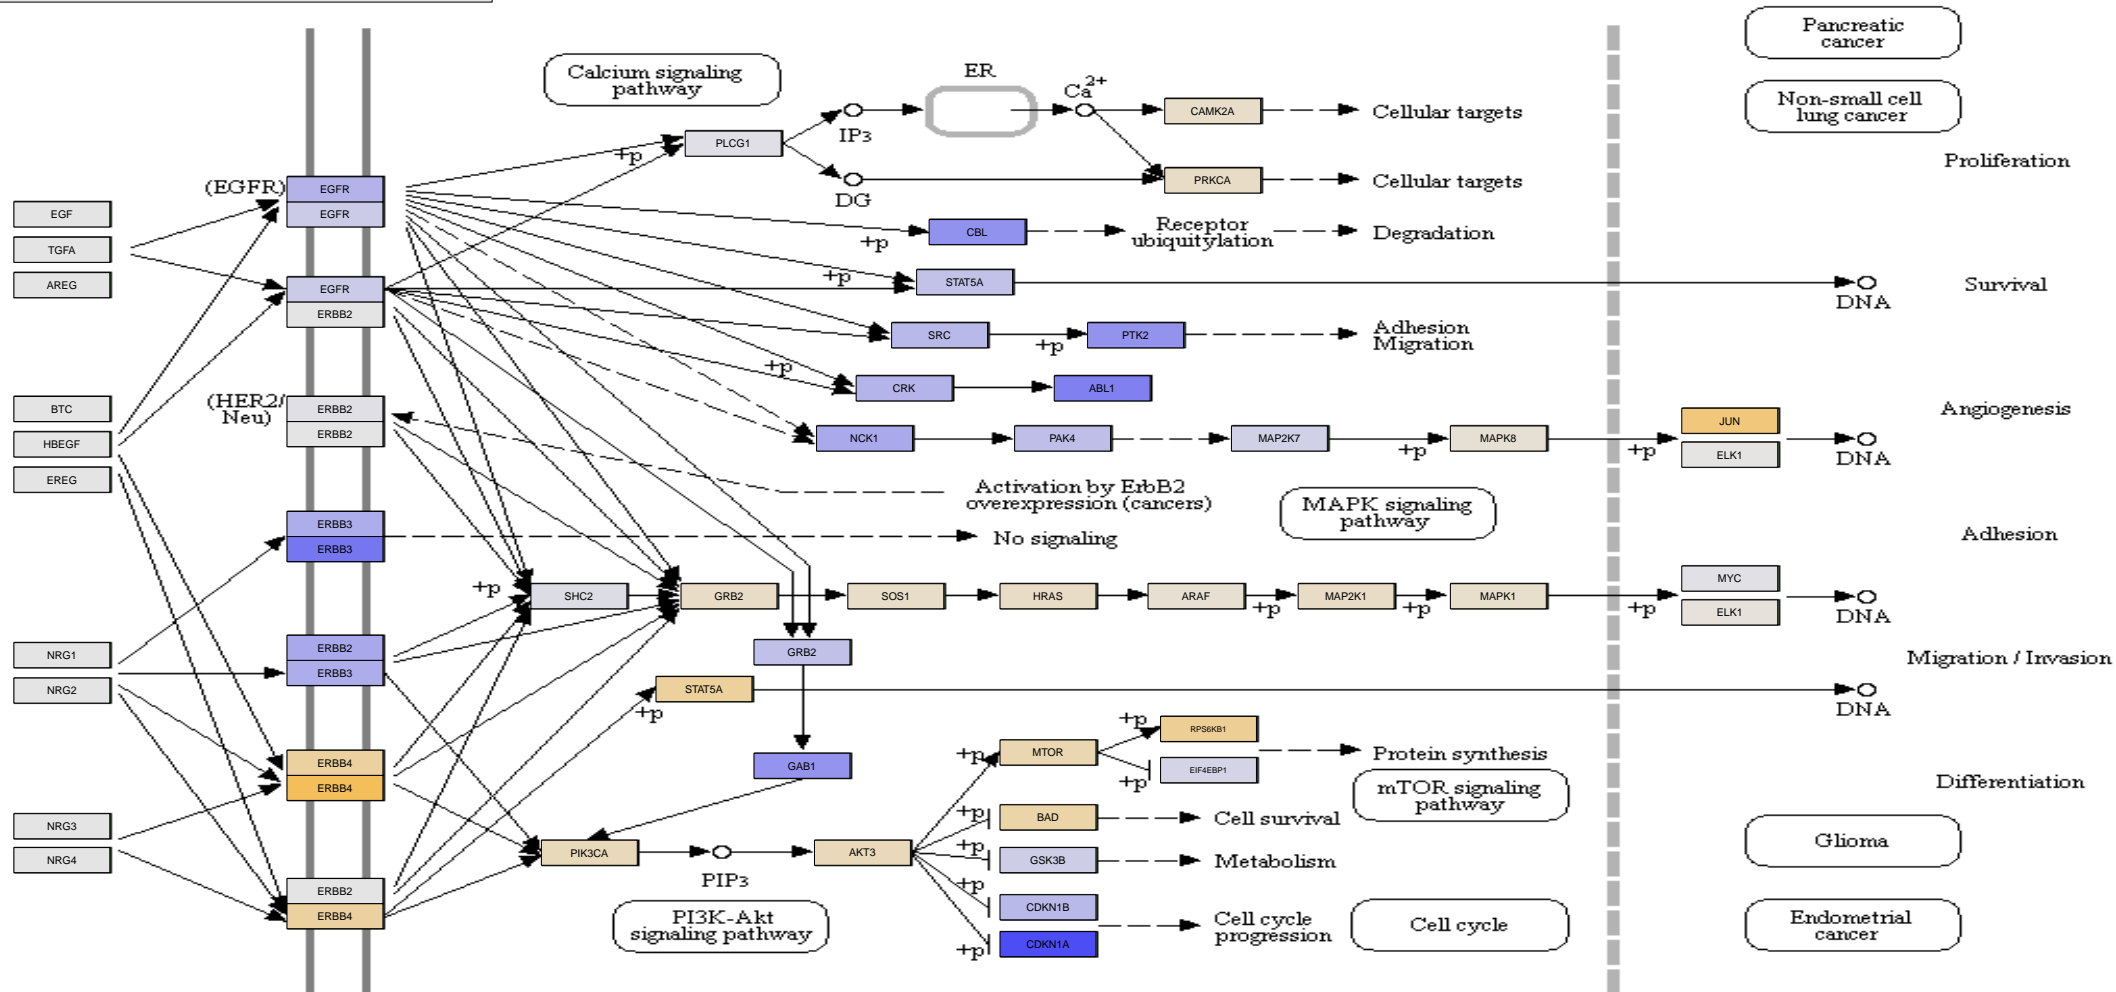

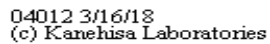

ErbB\_signaling\_pathway  
Adult

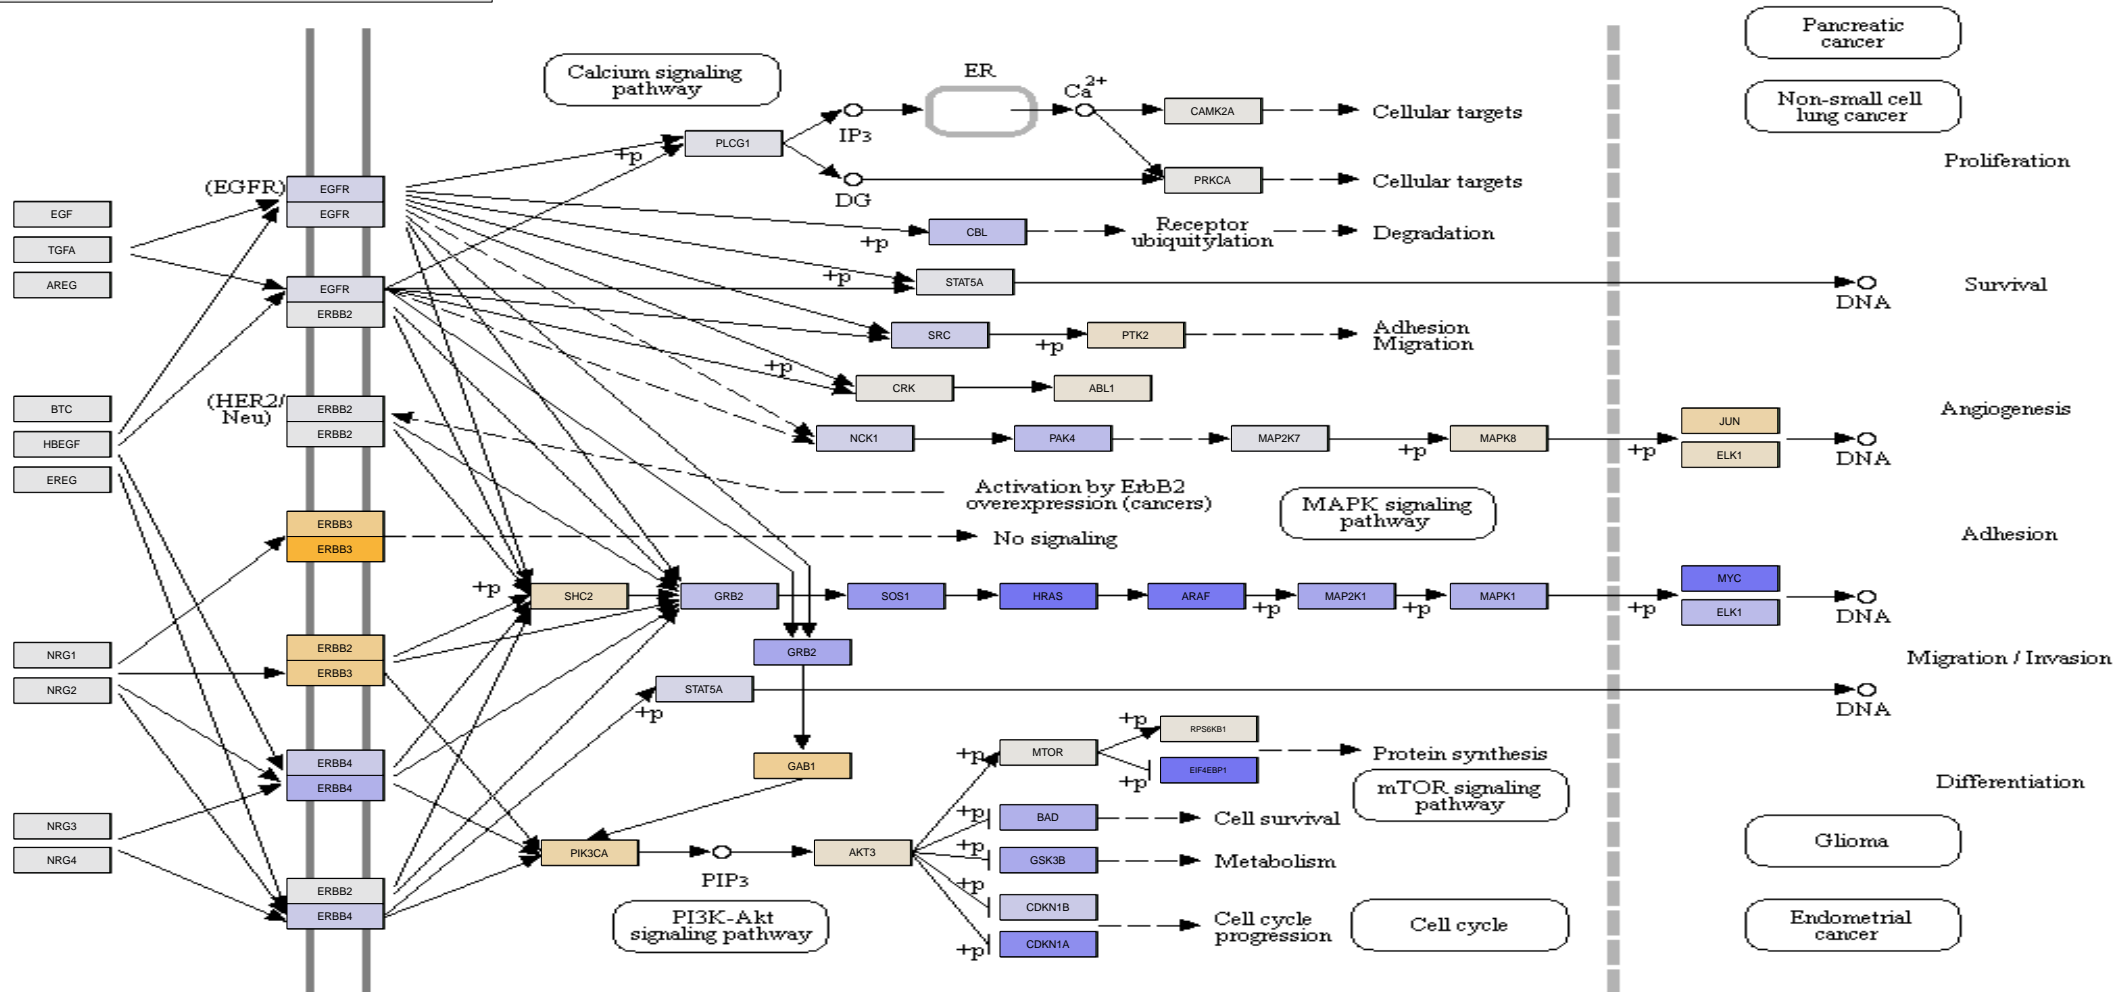

Supplement: s1 [file s1]
