# Supplementary material for: The Transcriptome and Methylome of the Developing and Aging Brain and Their Relations to Gliomas and Psychological Disorders
Source: MDPI journal article supplement (doi:10.3390/cells11030362), 2022-01-21

PI3K–Akt signaling pathway

all genes

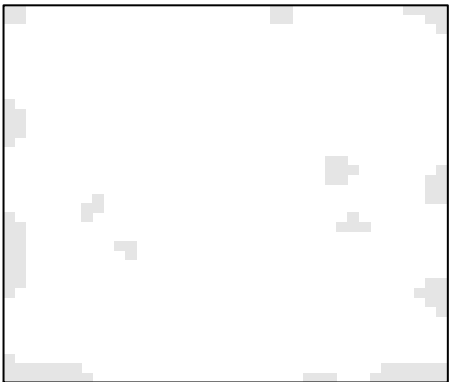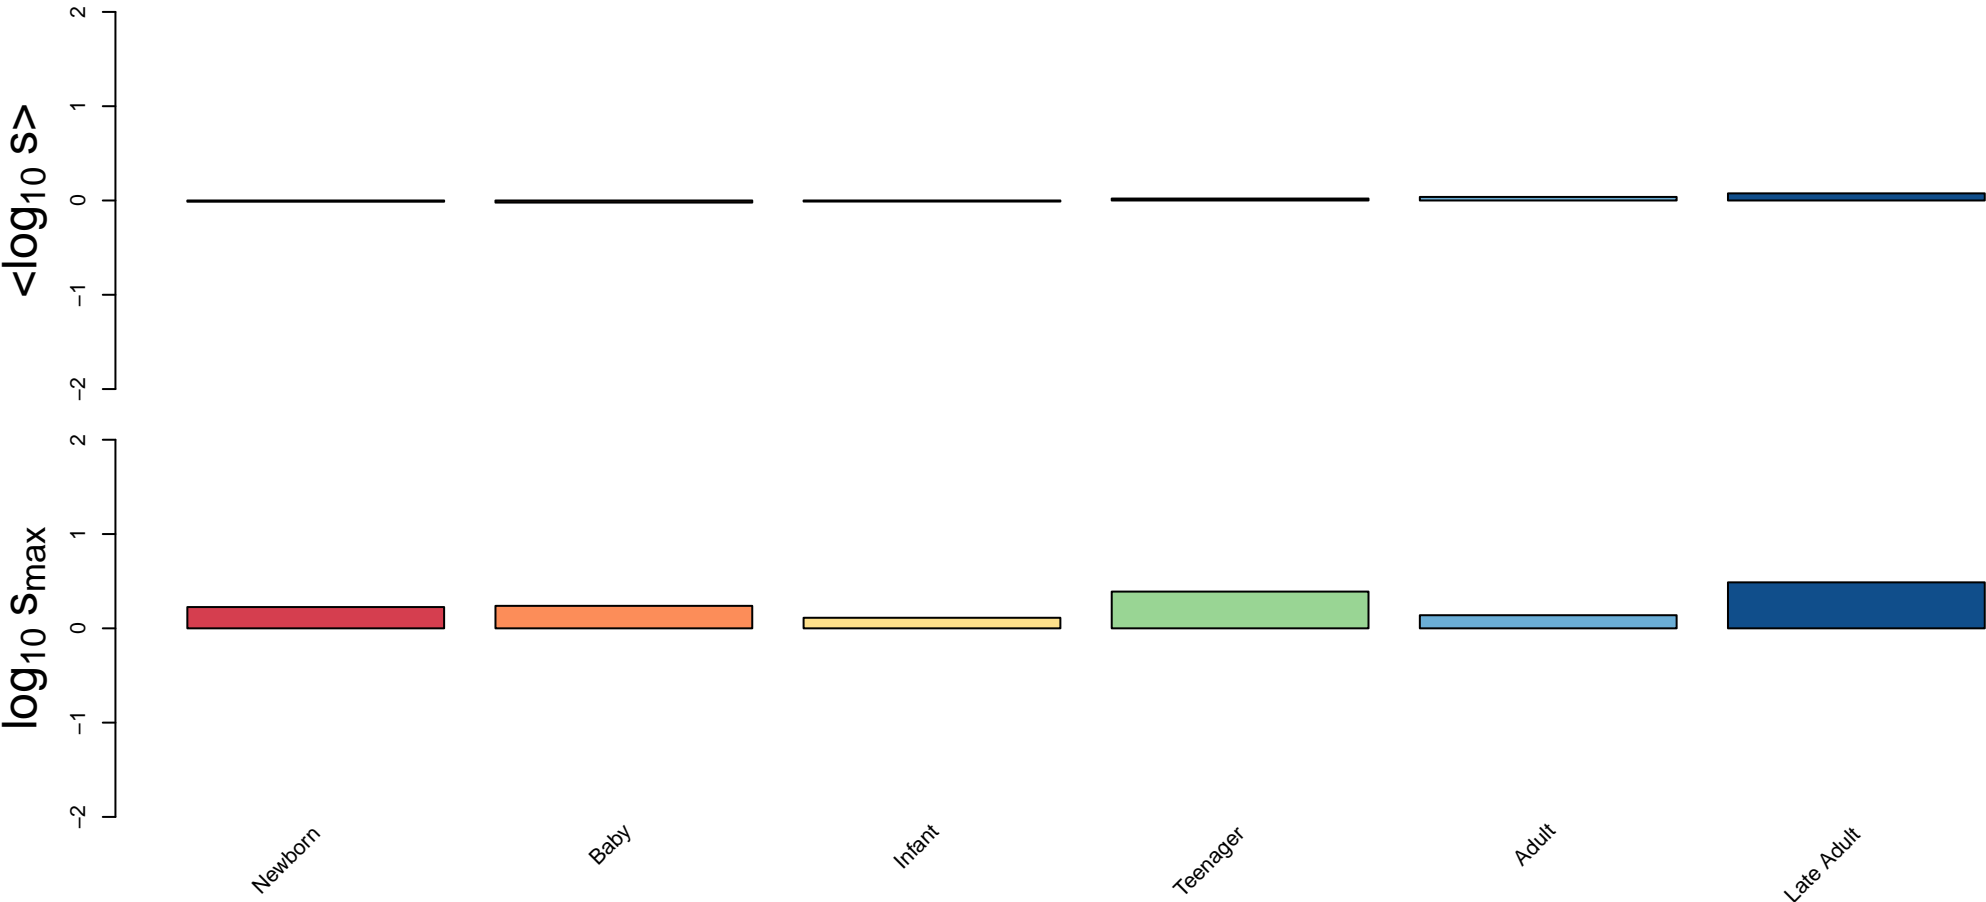

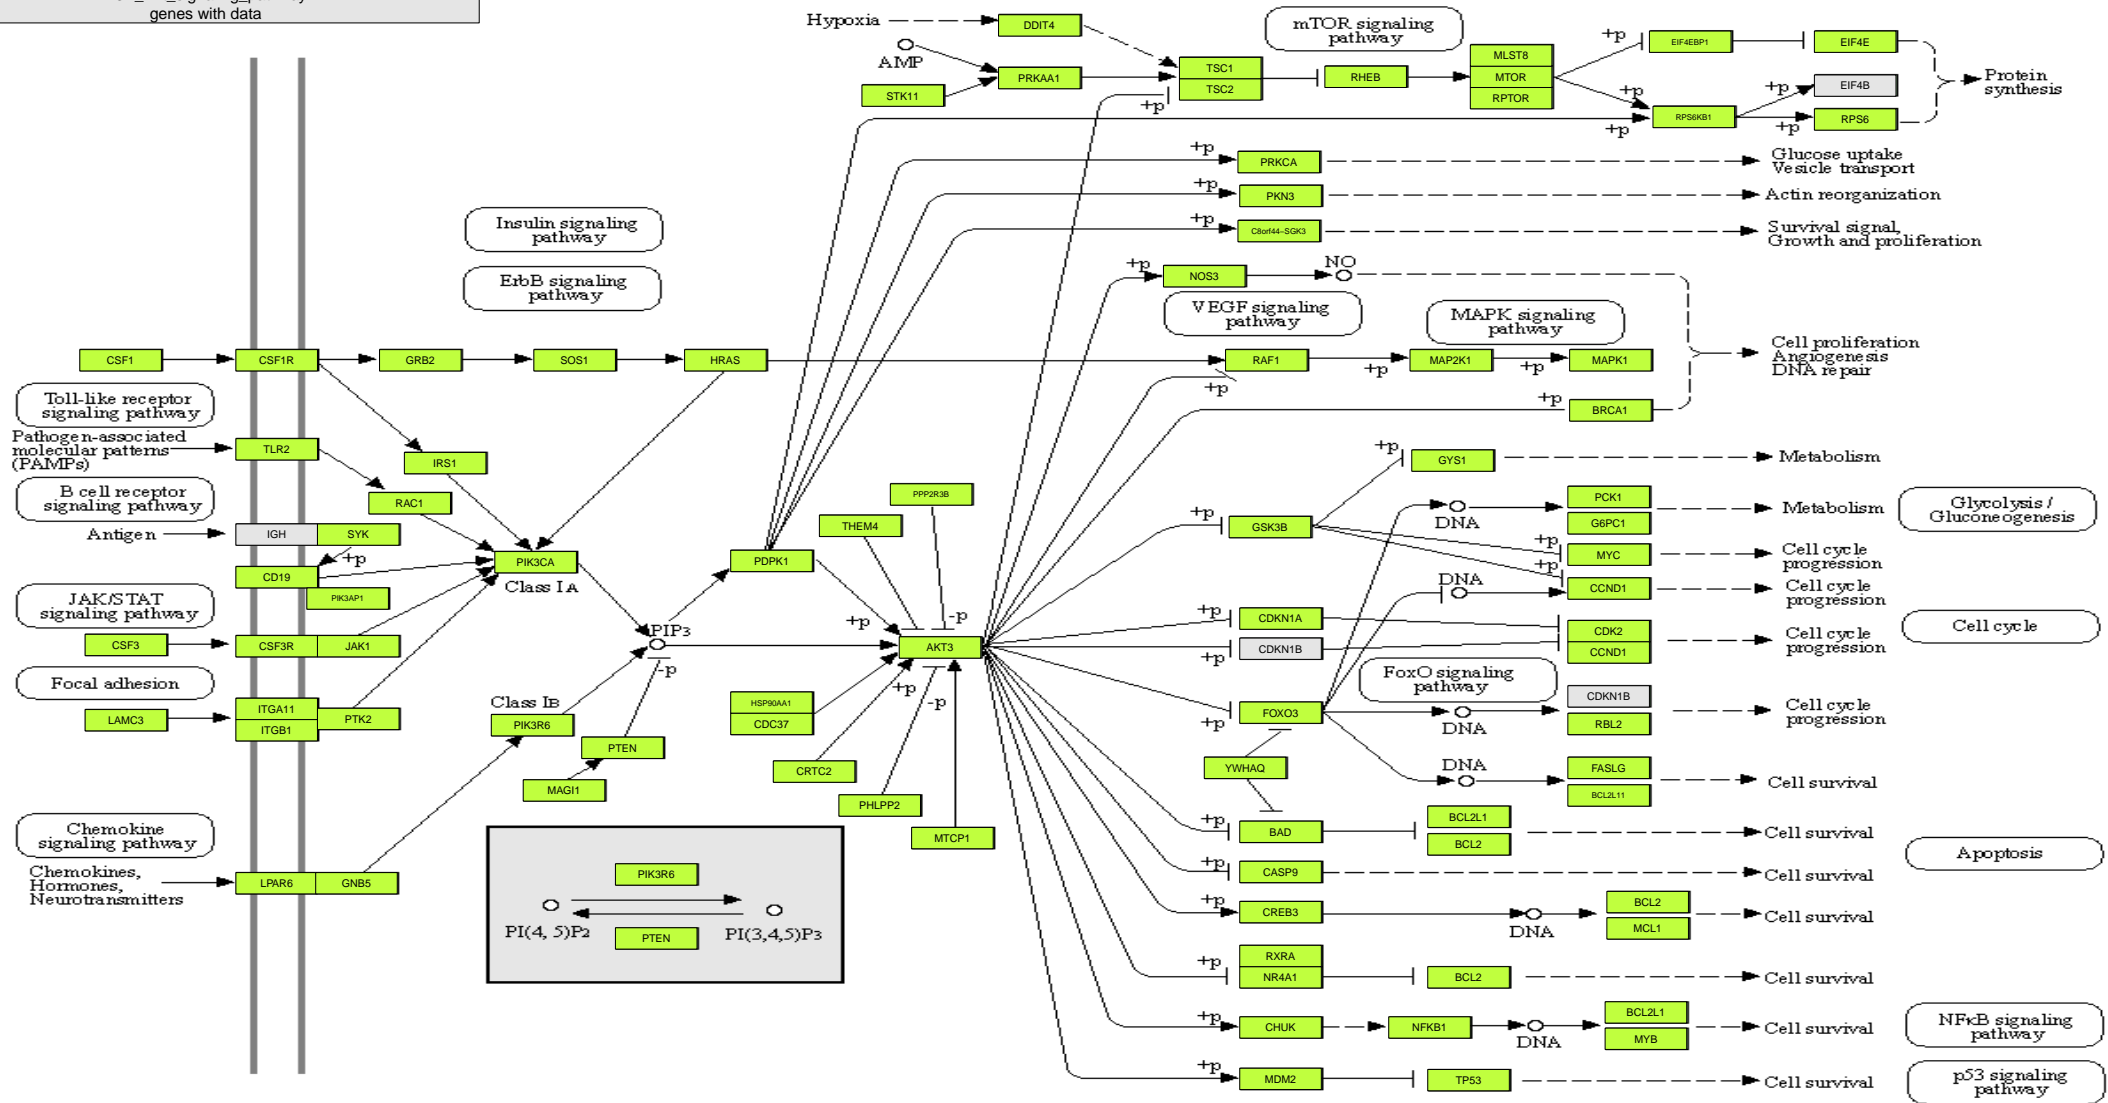

PI3K\_Akt\_signaling\_pathway  
sink nodes

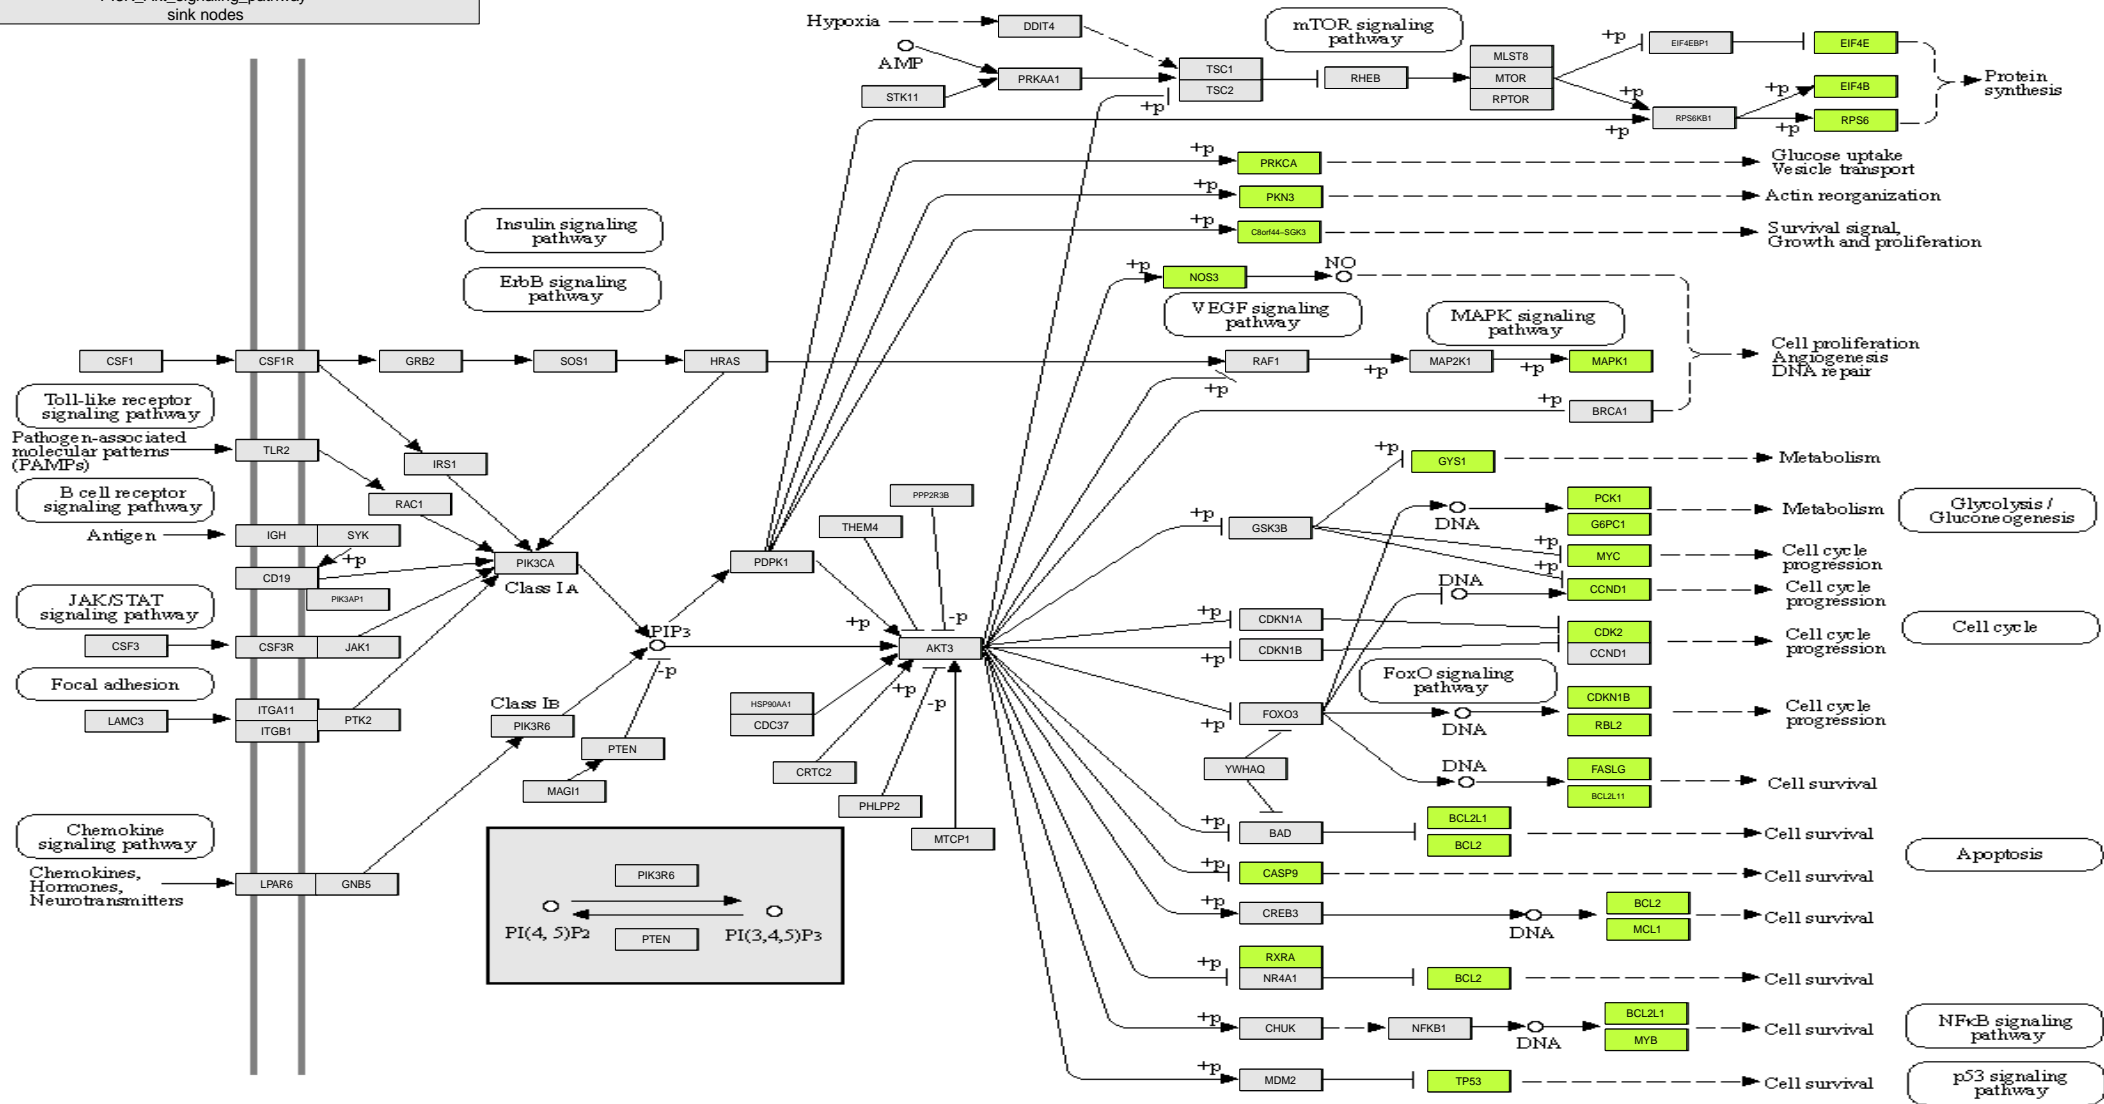

PI3K\_Akt\_signaling\_pathway  
Newborn

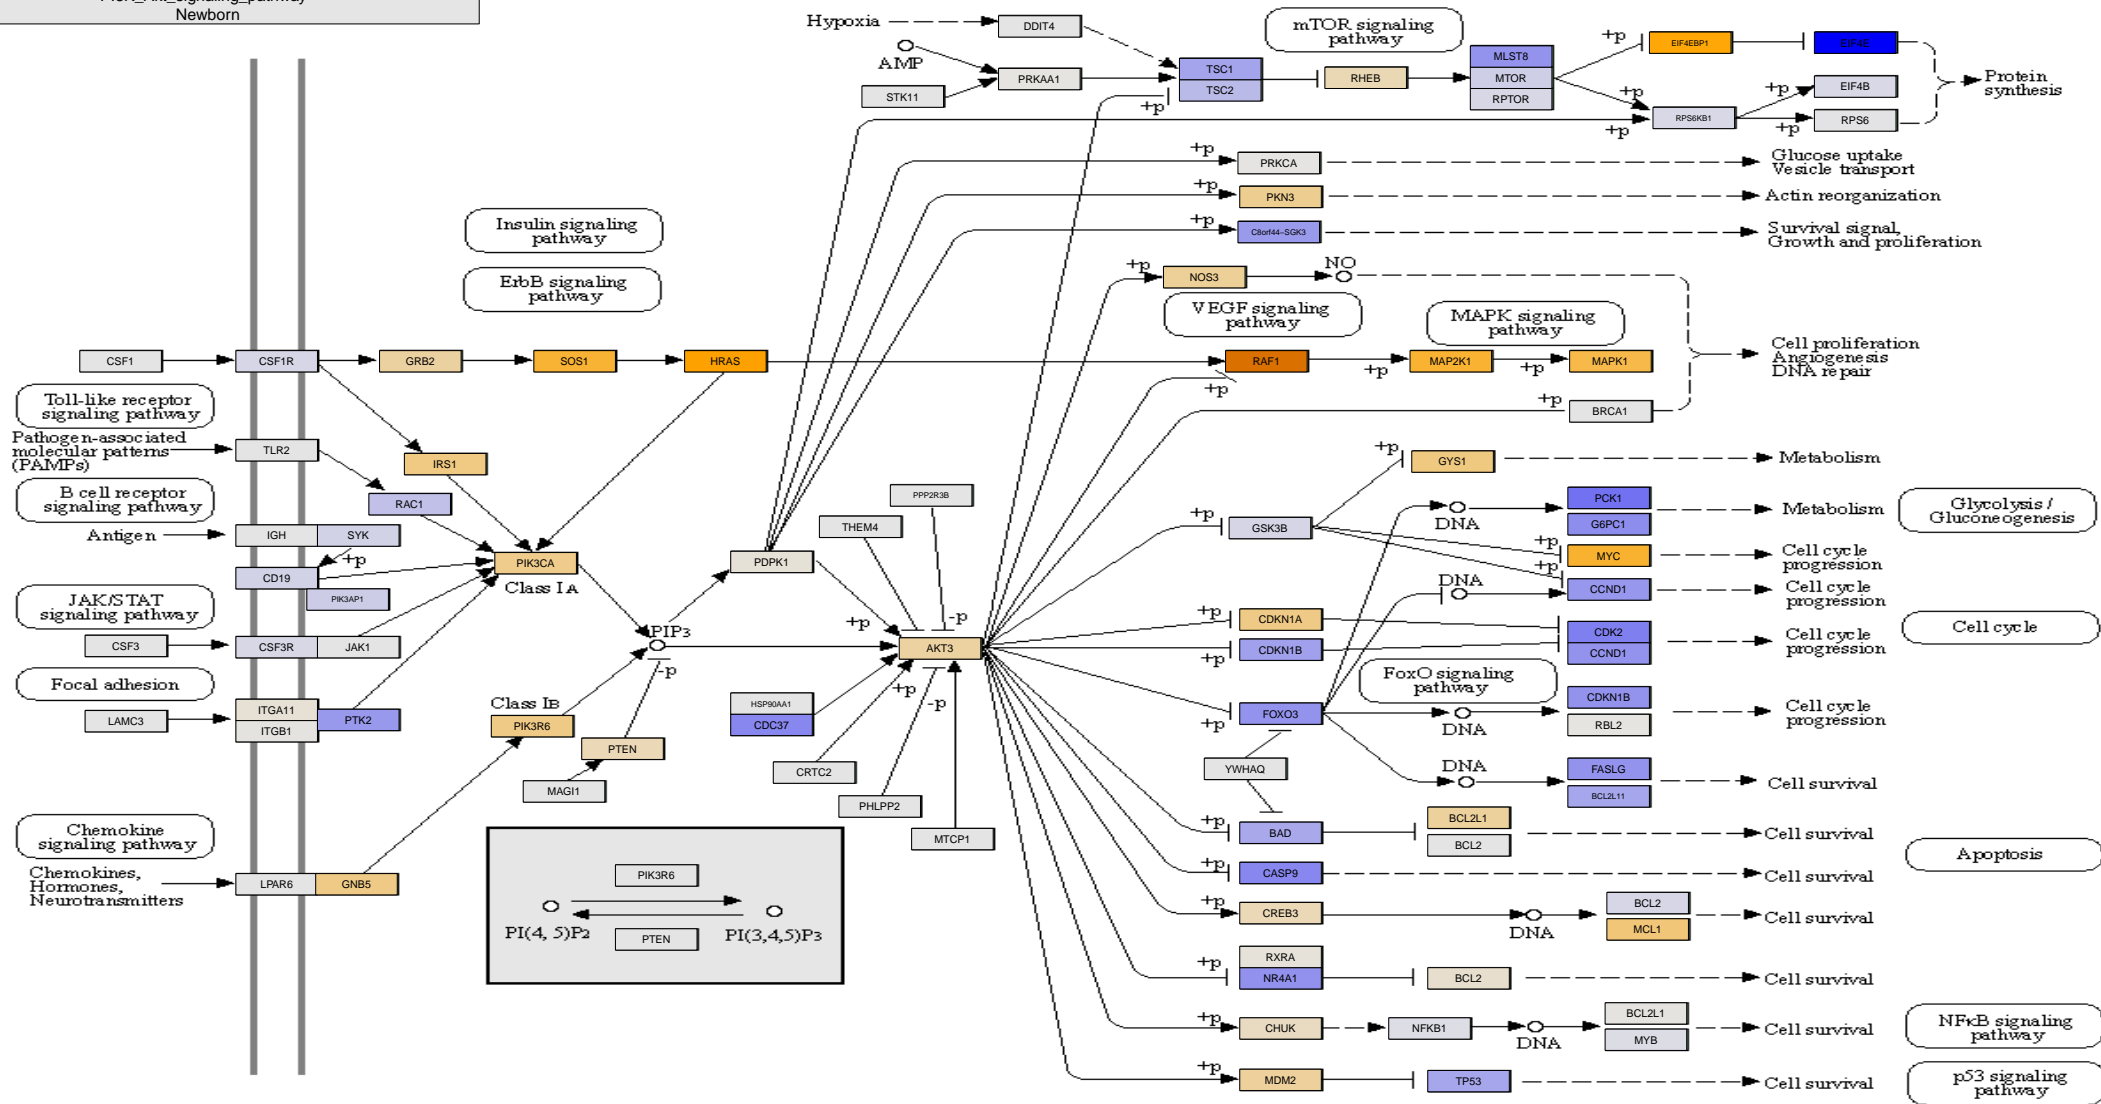

PI3K\_Akt\_signaling\_pathway  
Baby

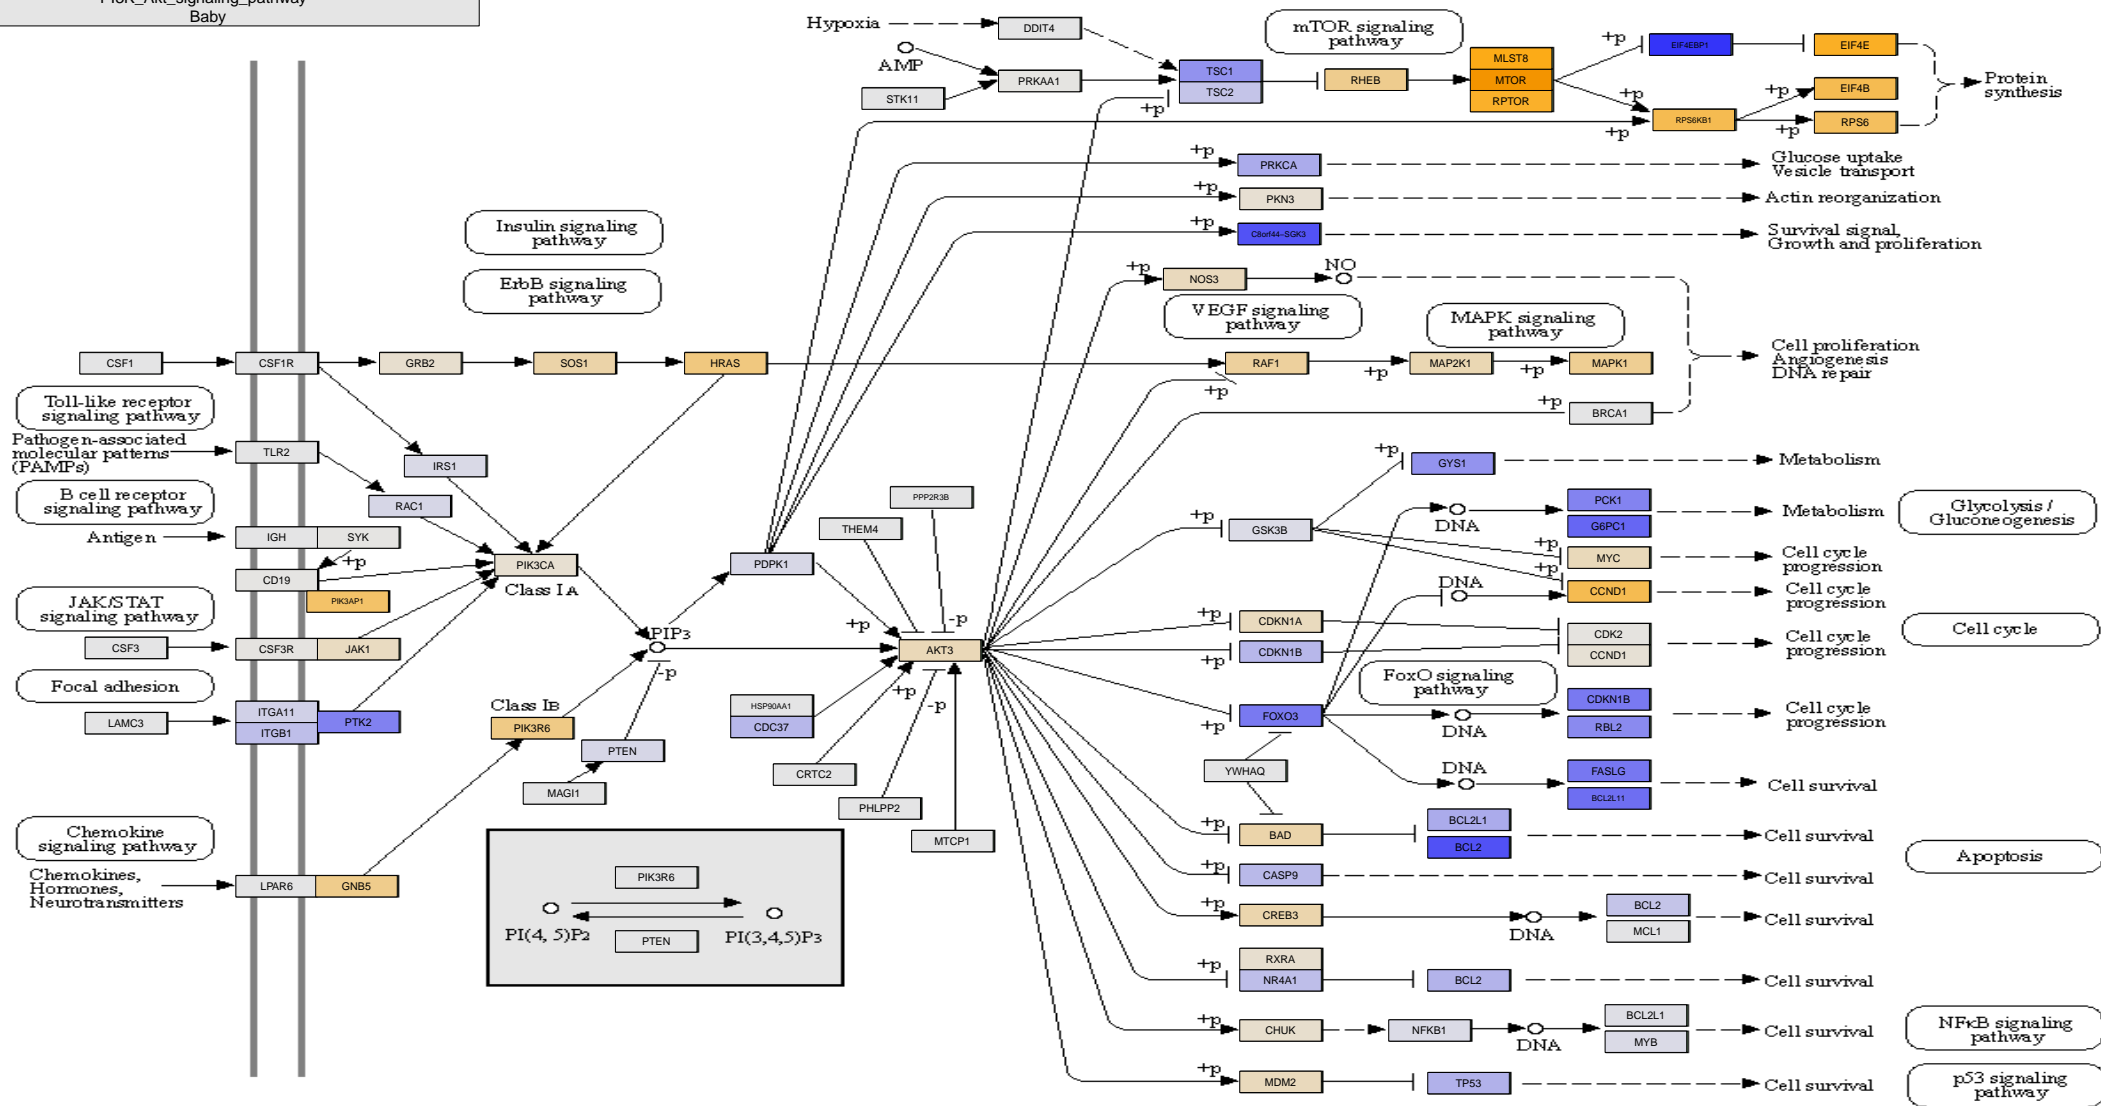



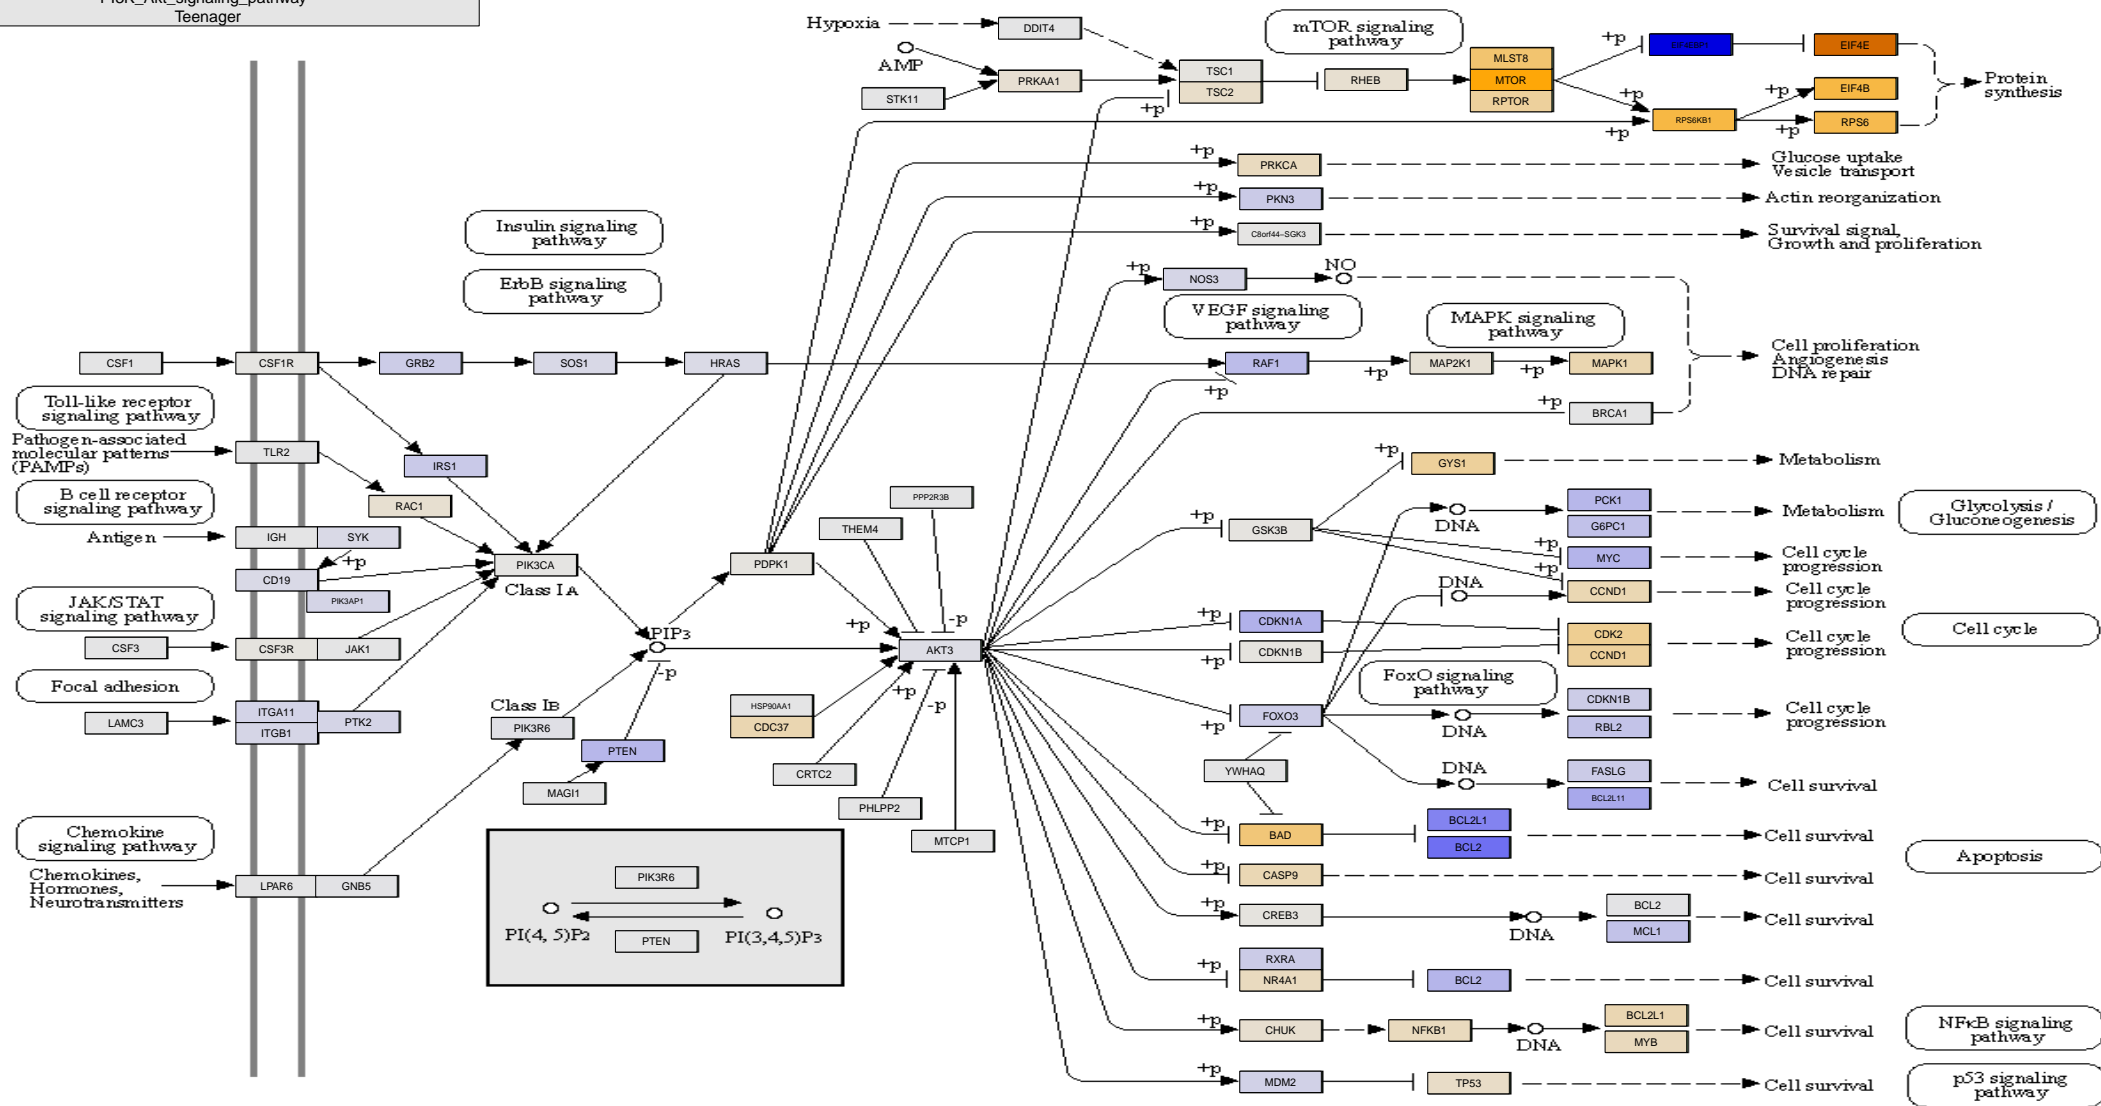

Supplement: s1 [file s1]
