# Supplementary material for: The Transcriptome and Methylome of the Developing and Aging Brain and Their Relations to Gliomas and Psychological Disorders
Source: MDPI journal article supplement (doi:10.3390/cells11030362), 2022-01-21

NOD-like receptor signaling pathway

all genes

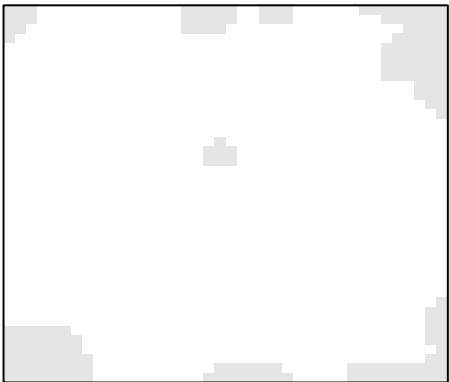

maximum = -Inf

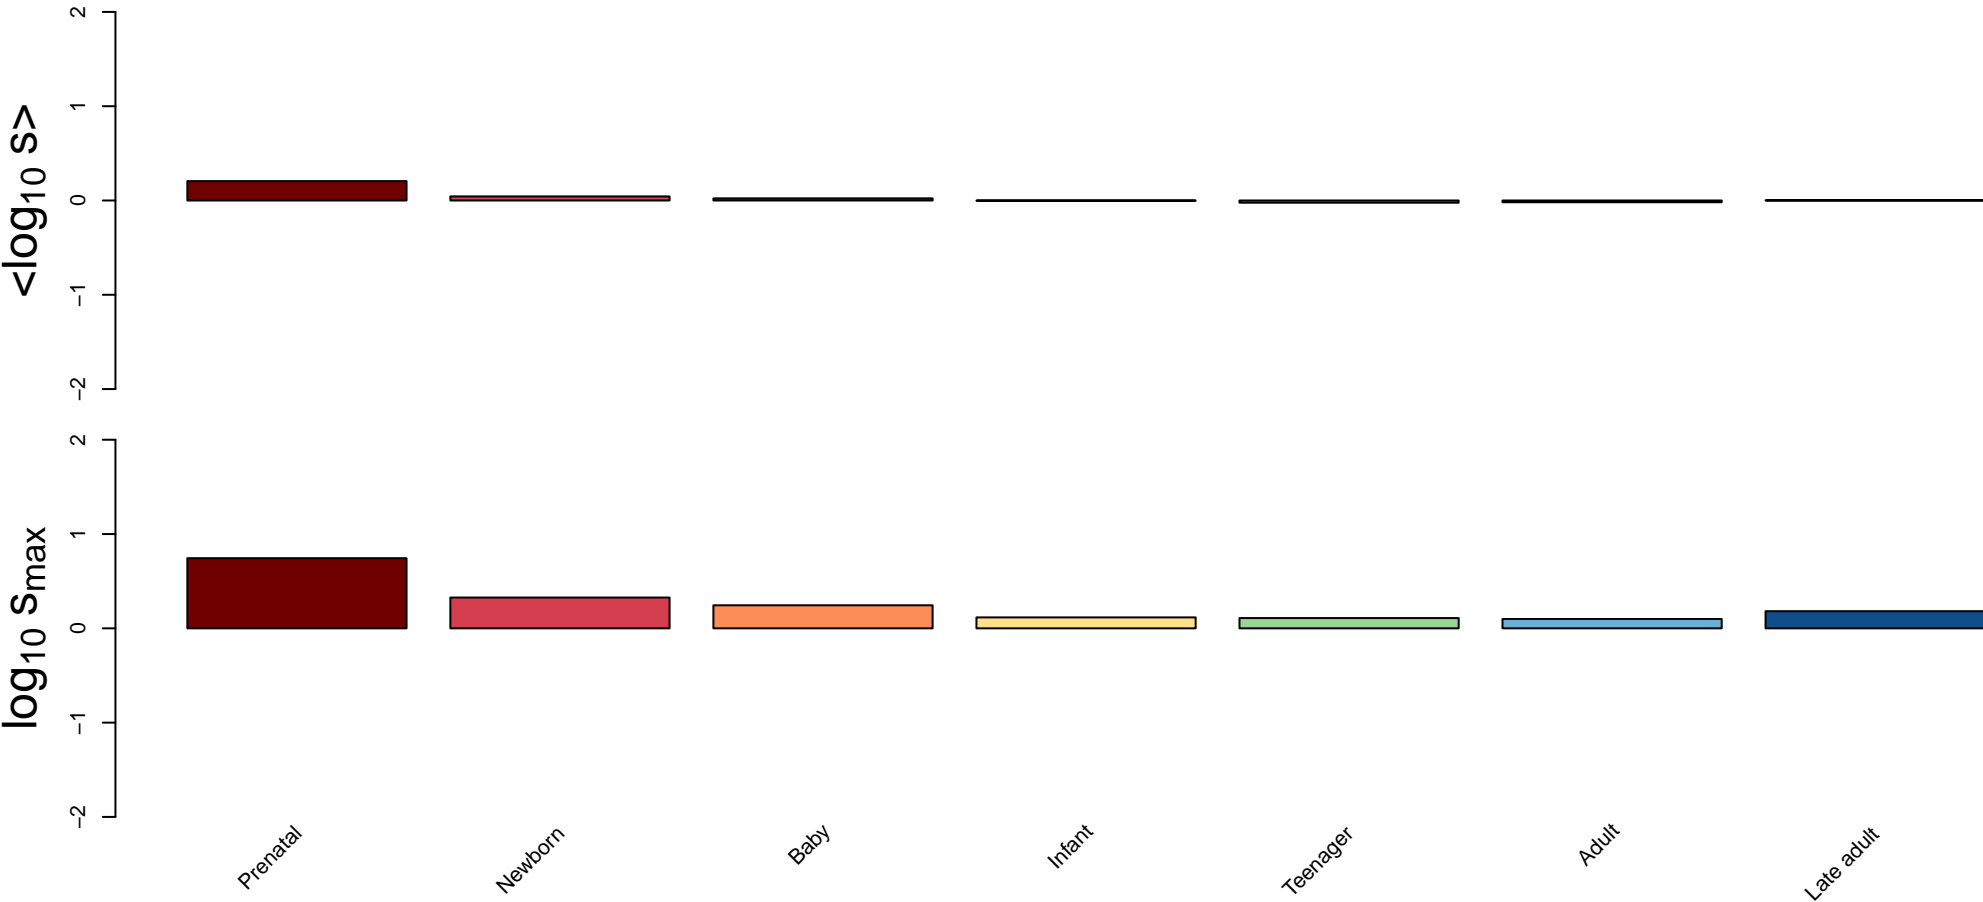

# NOD-like receptor signaling pathway genes with data

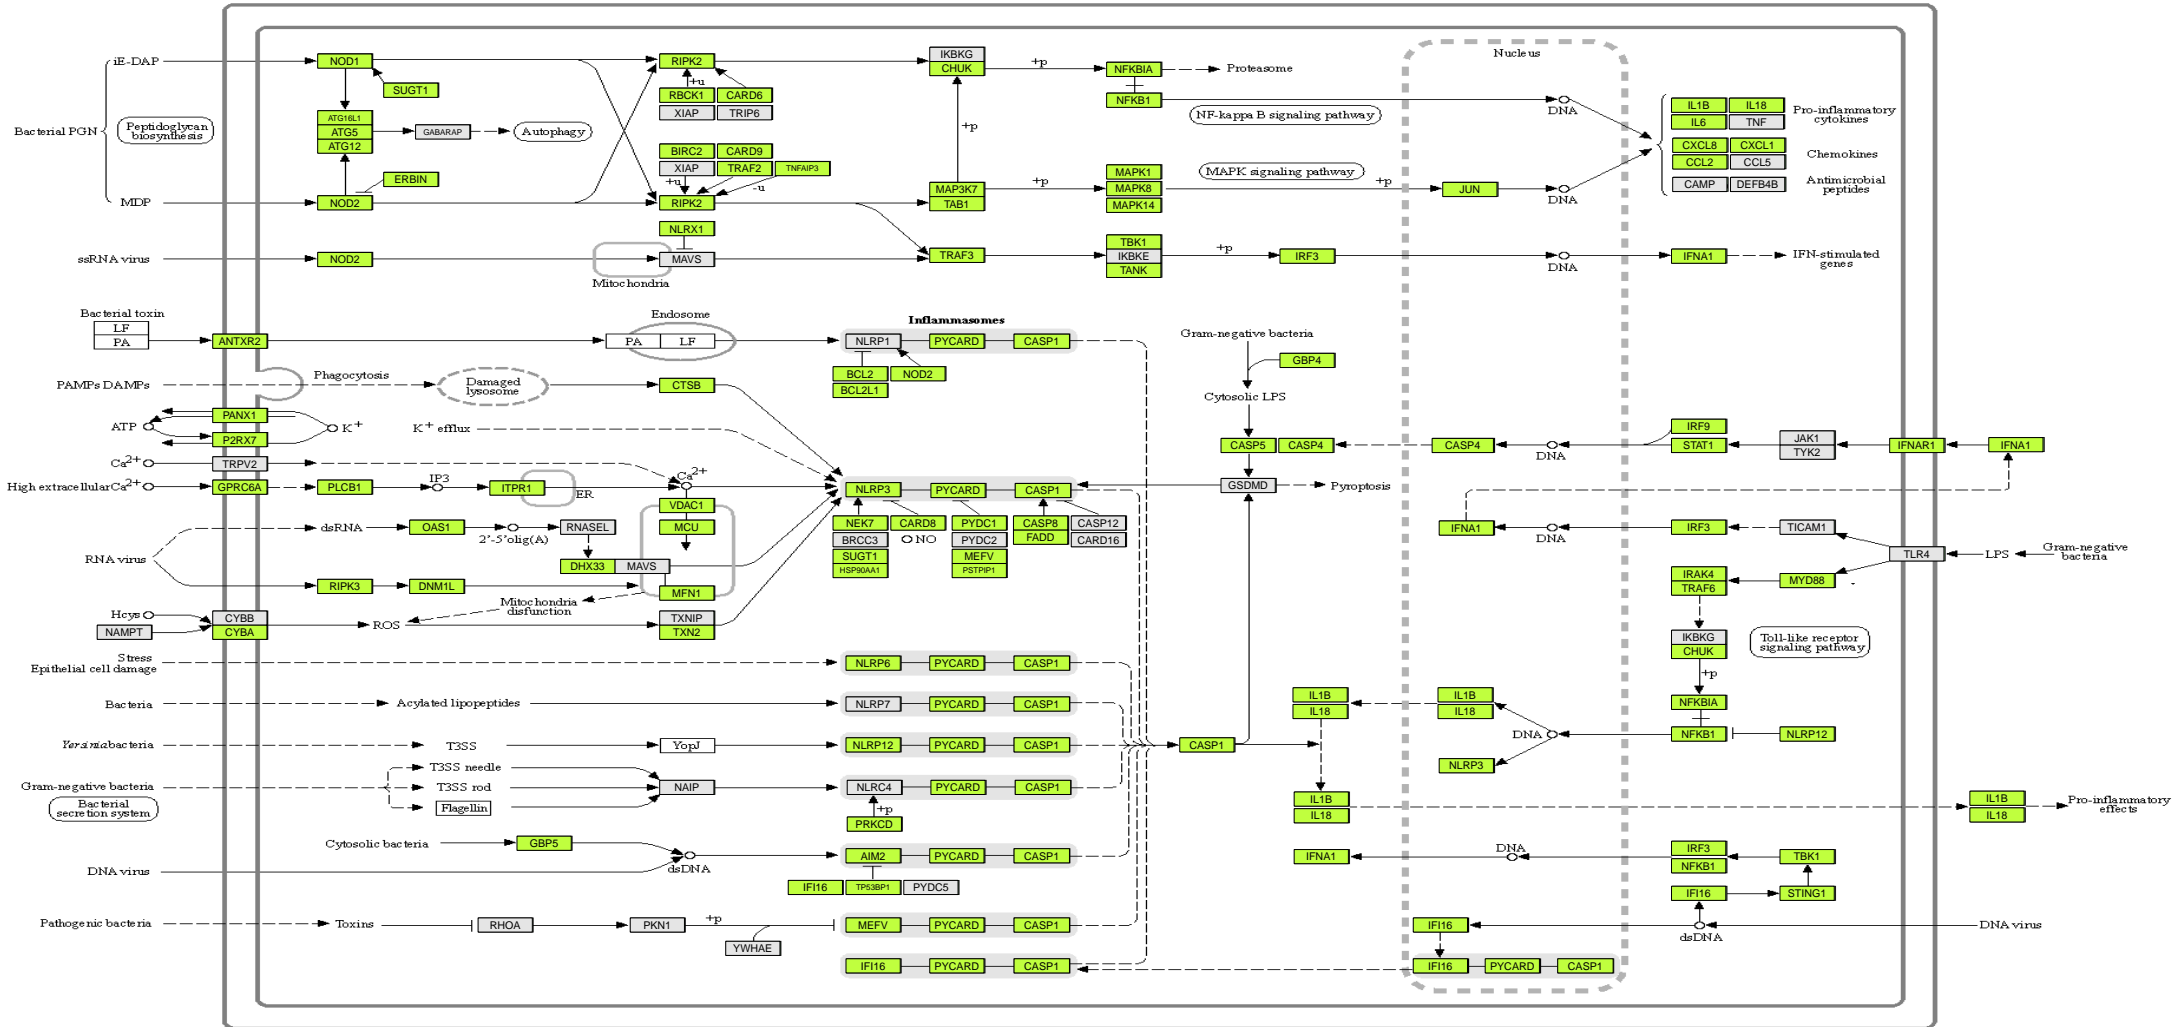





# NOD-like receptor signaling pathway Newborn

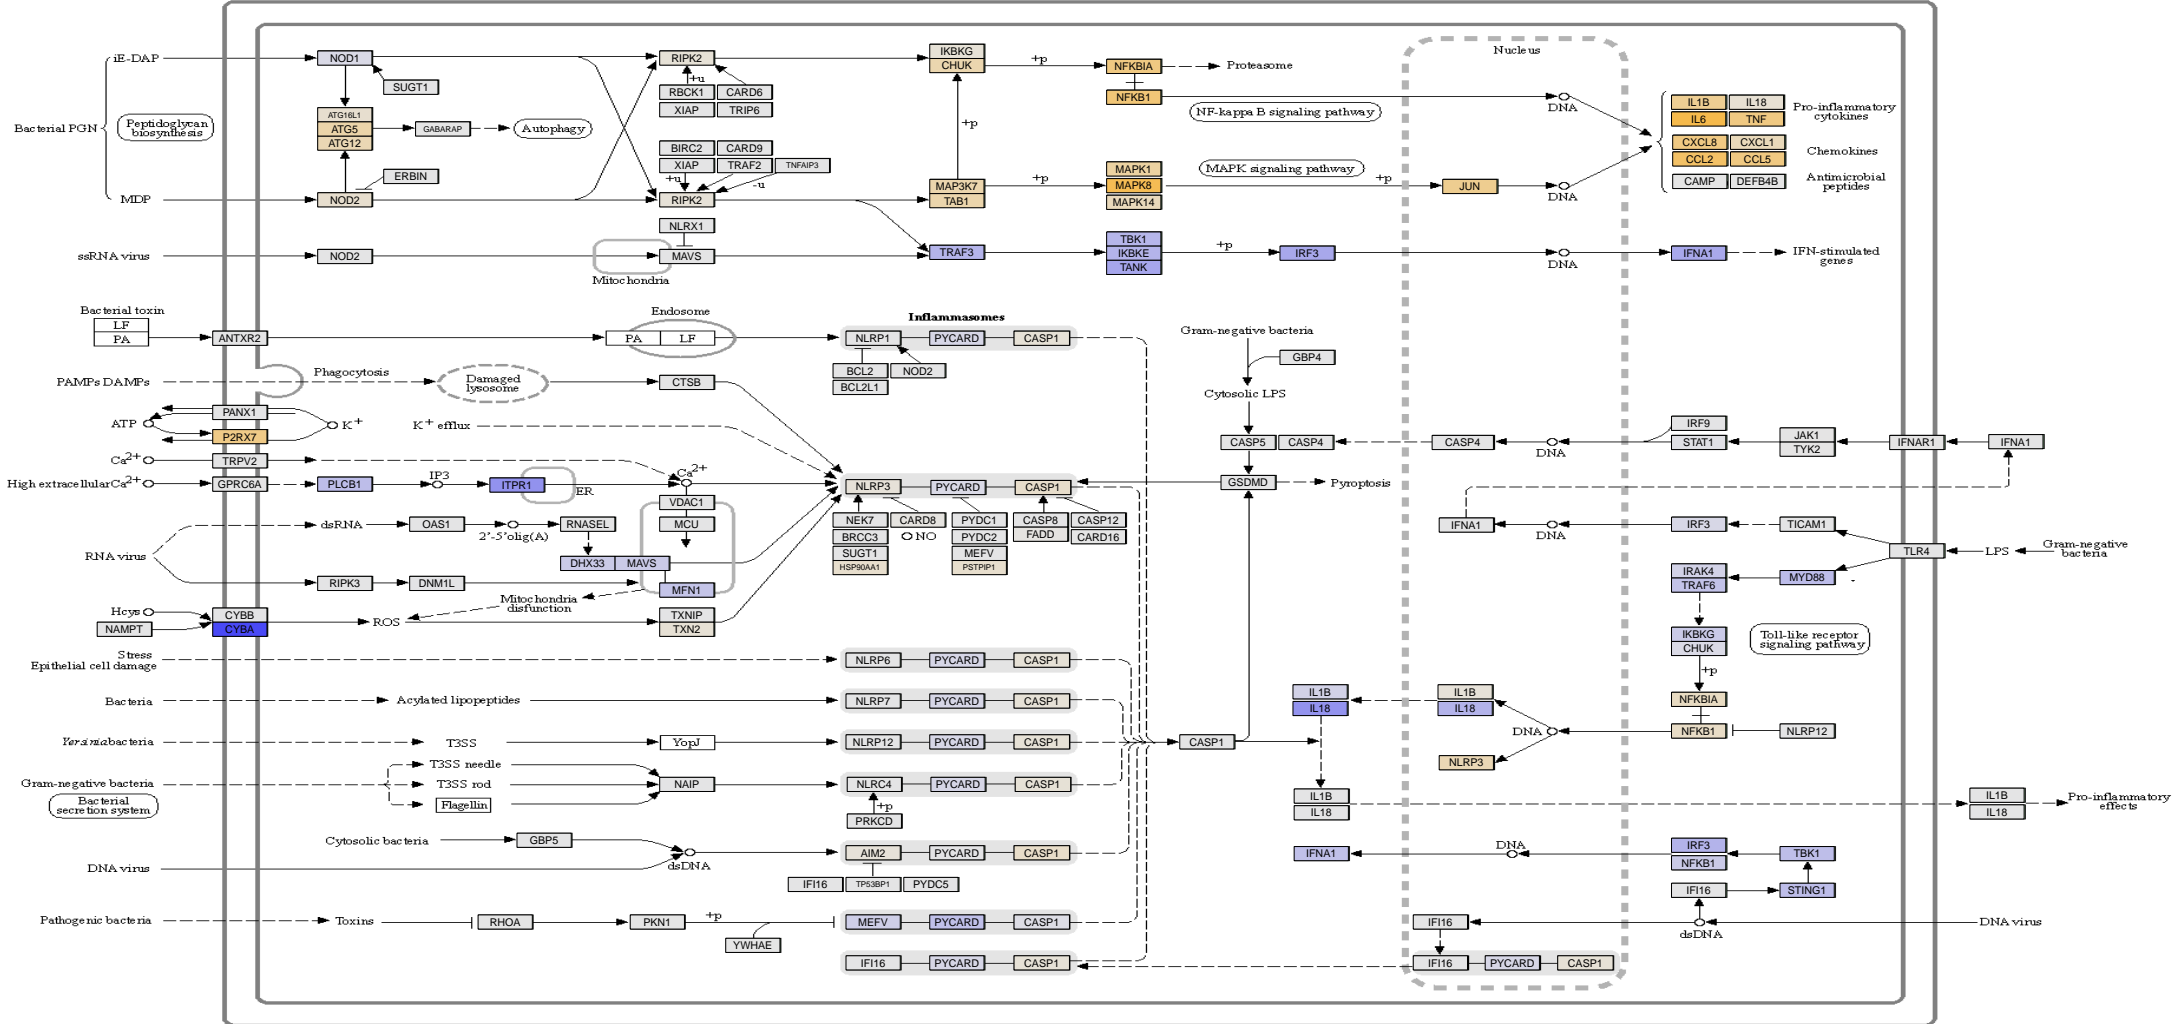

**Baby**

# NOD-like receptor signaling pathway

Infant

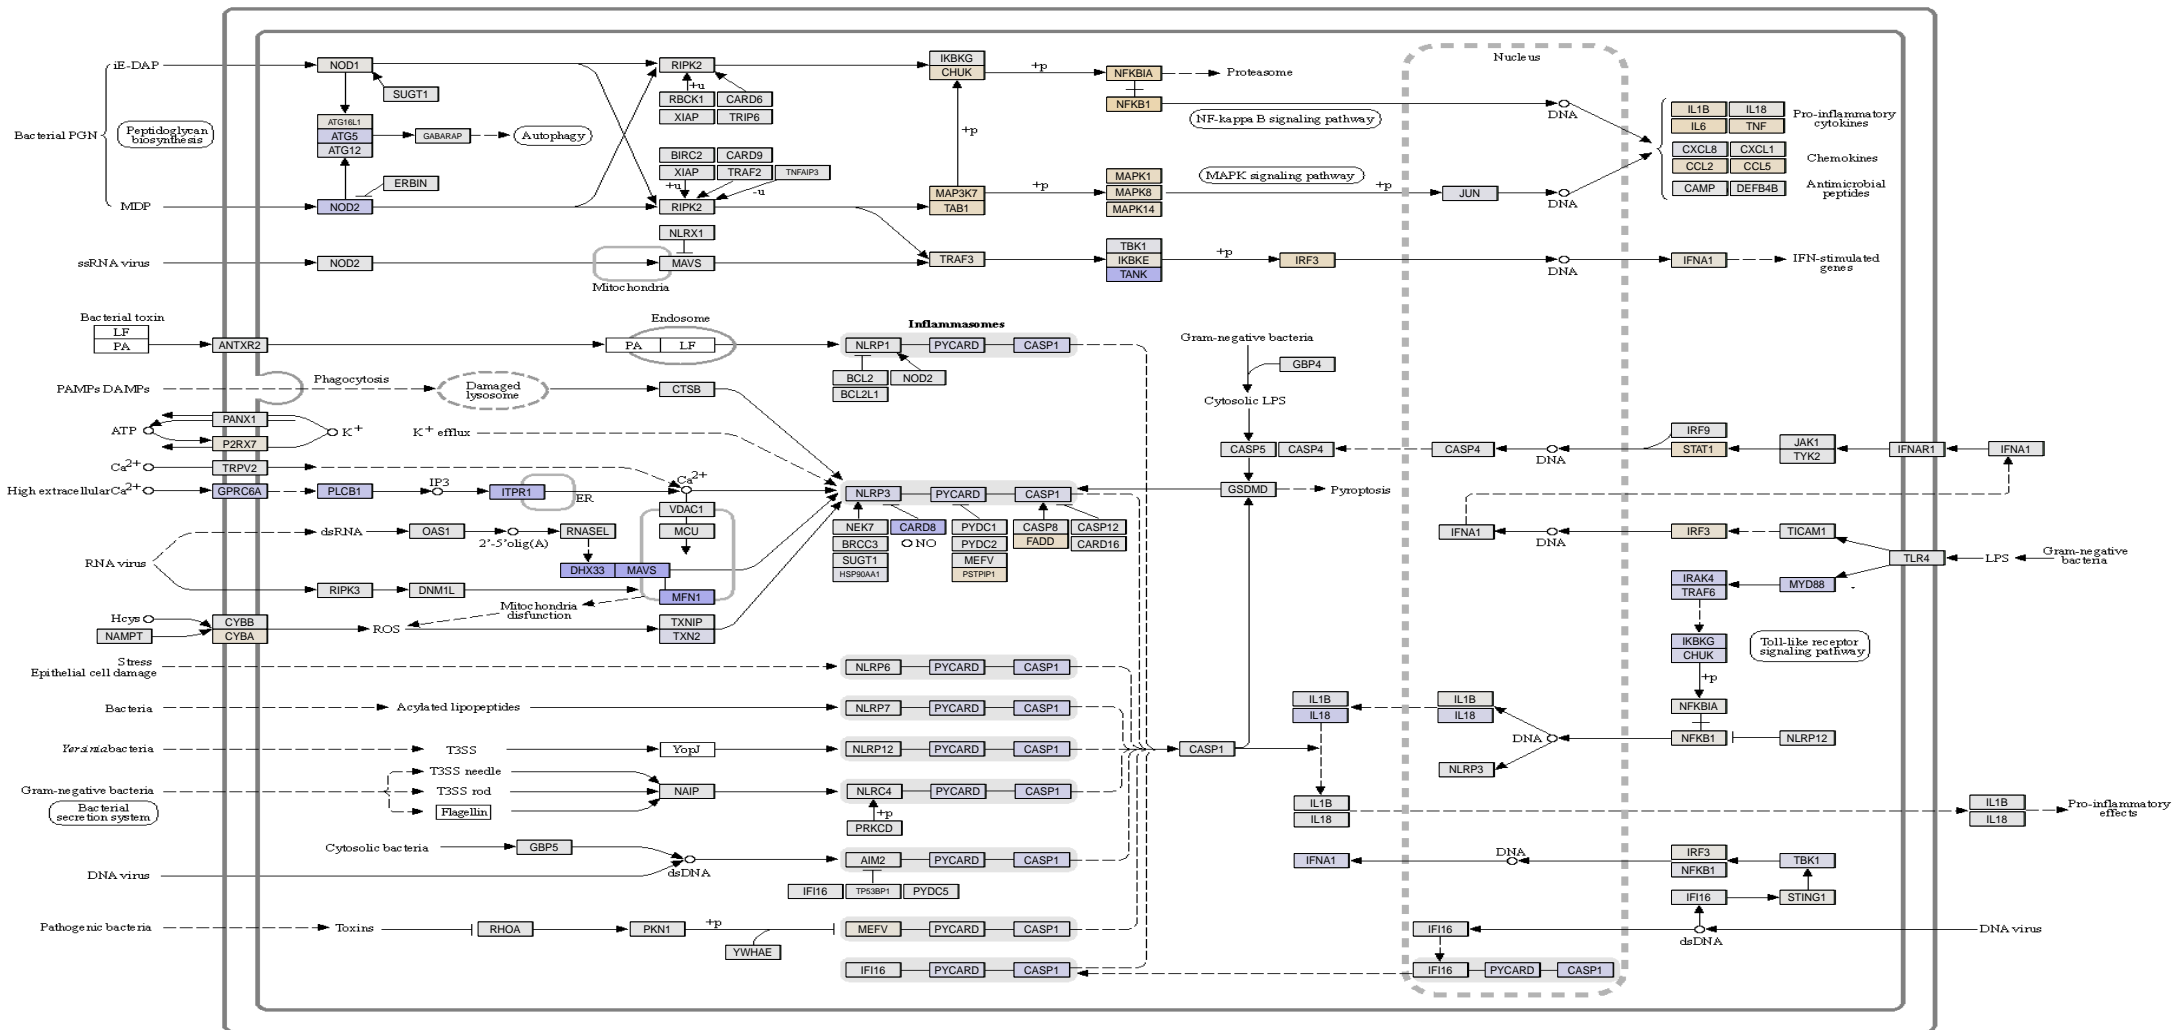

# NOD-like receptor signaling pathway

Teenager

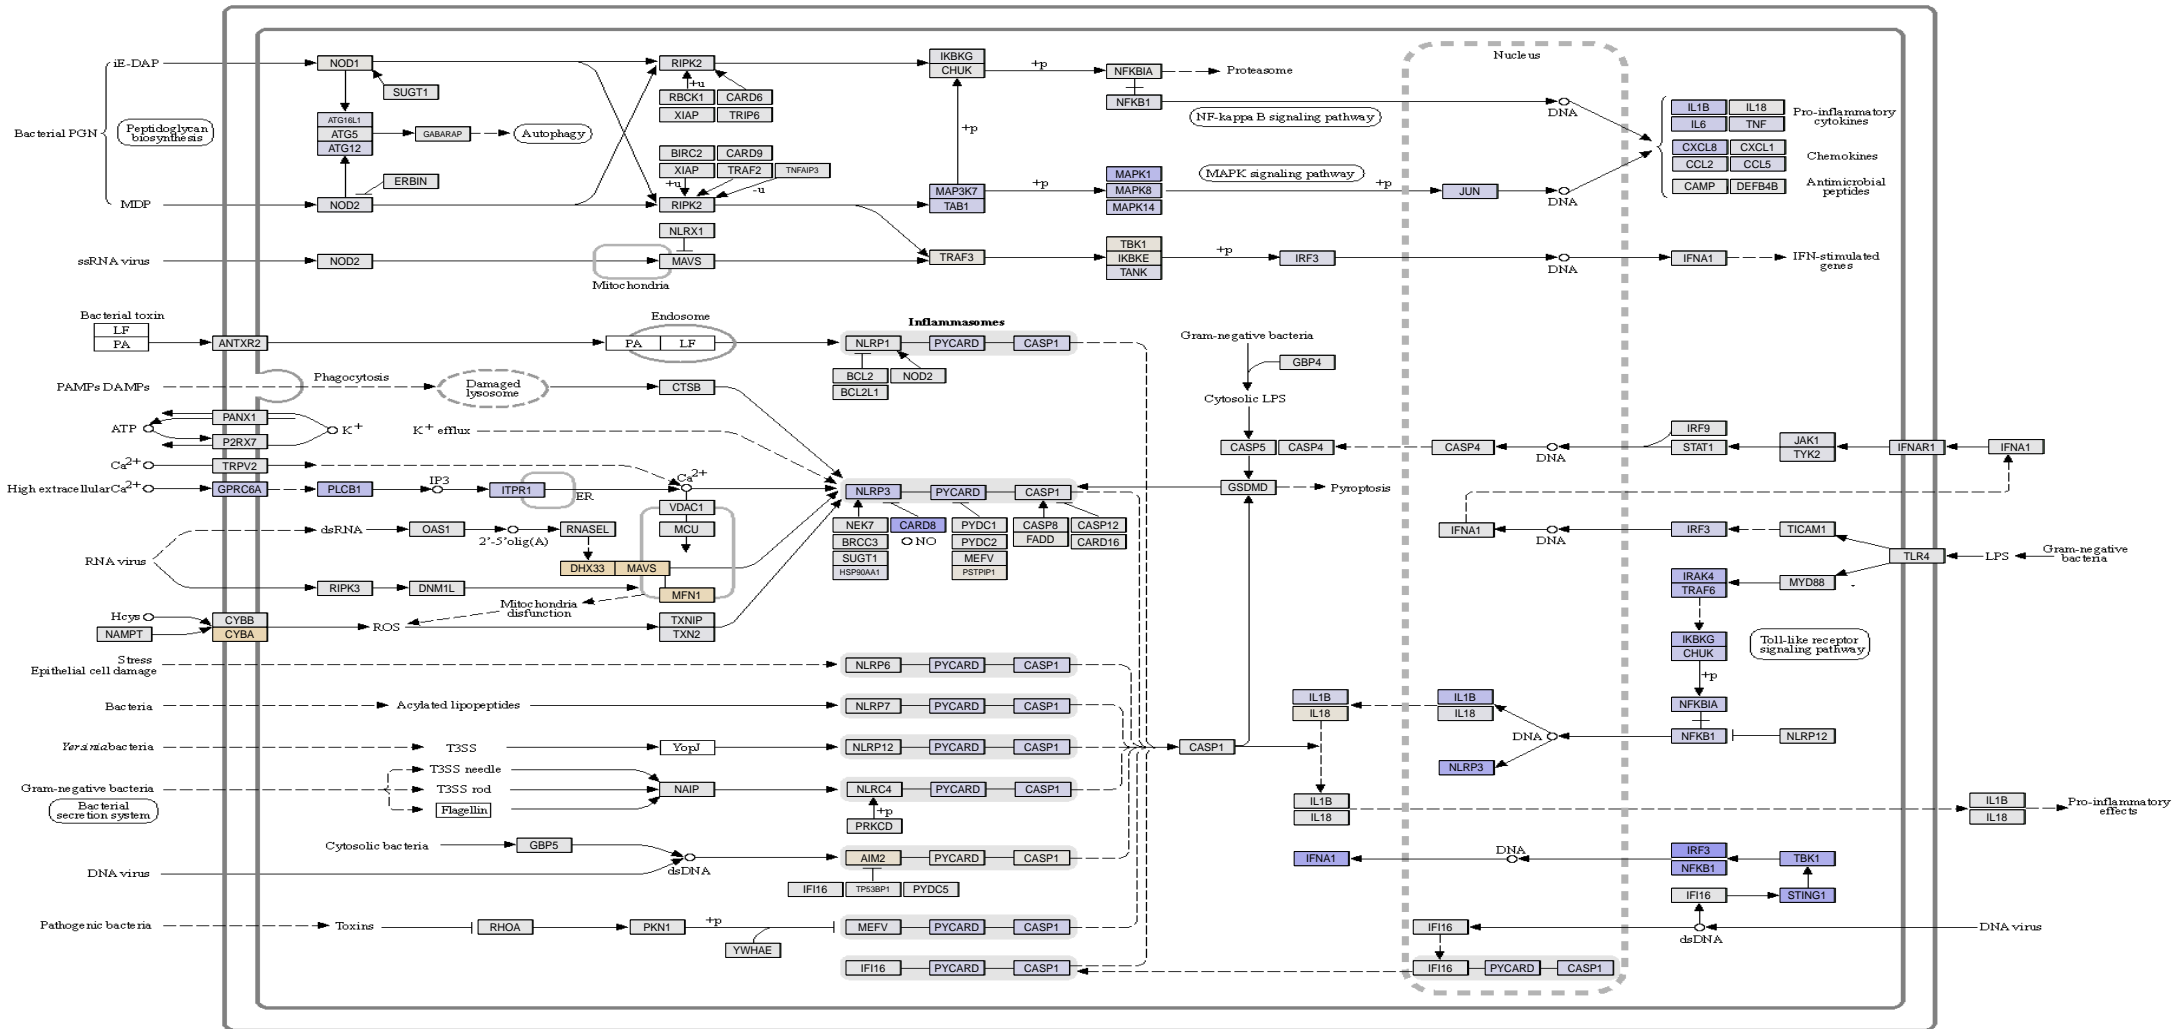



Adult

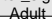

# NOD-like receptor signaling pathway Late adult

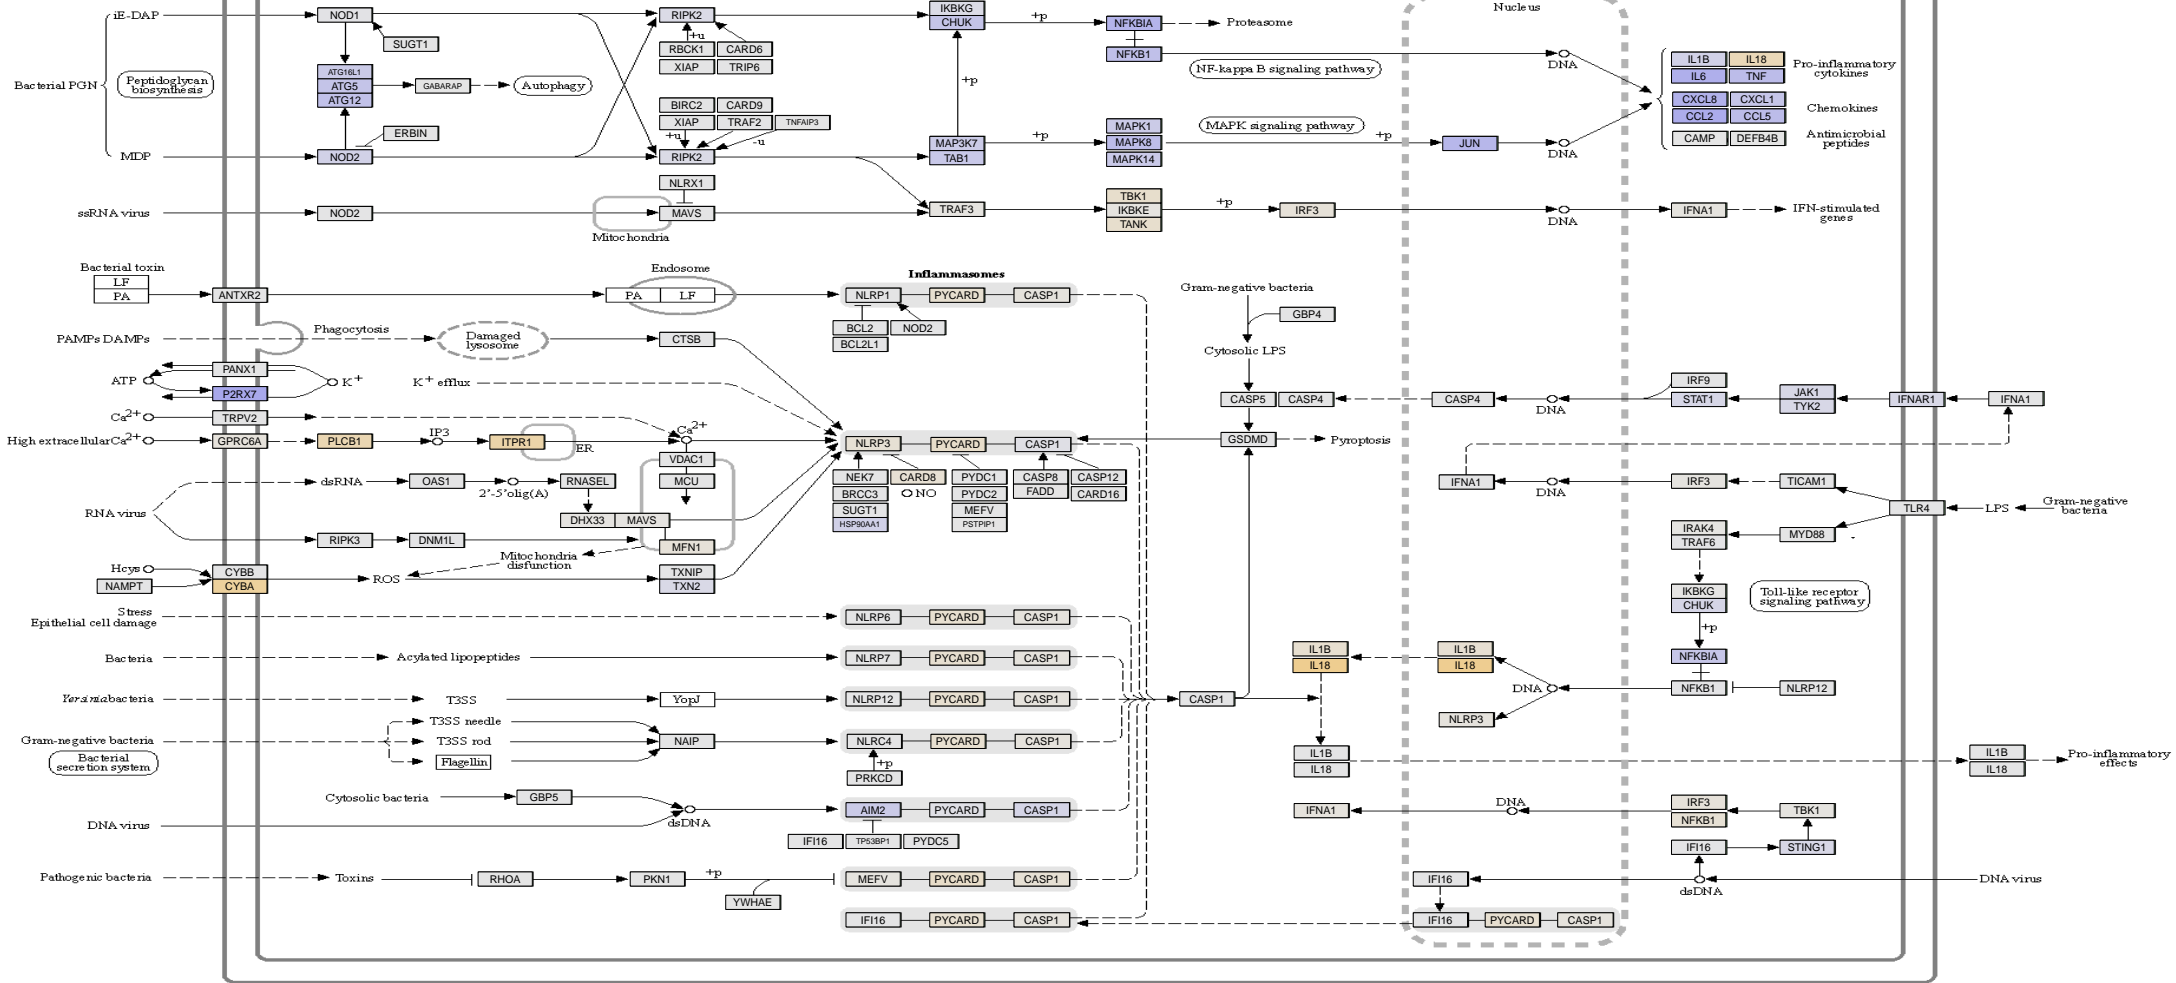

Supplement: s1 [file s1]
