# Supplementary material for: The Transcriptome and Methylome of the Developing and Aging Brain and Their Relations to Gliomas and Psychological Disorders
Source: MDPI journal article supplement (doi:10.3390/cells11030362), 2022-01-21

Estrogen signaling pathway

all genes

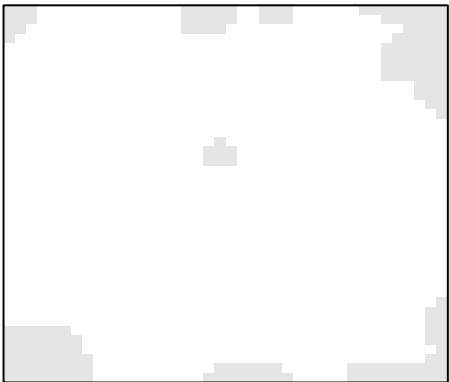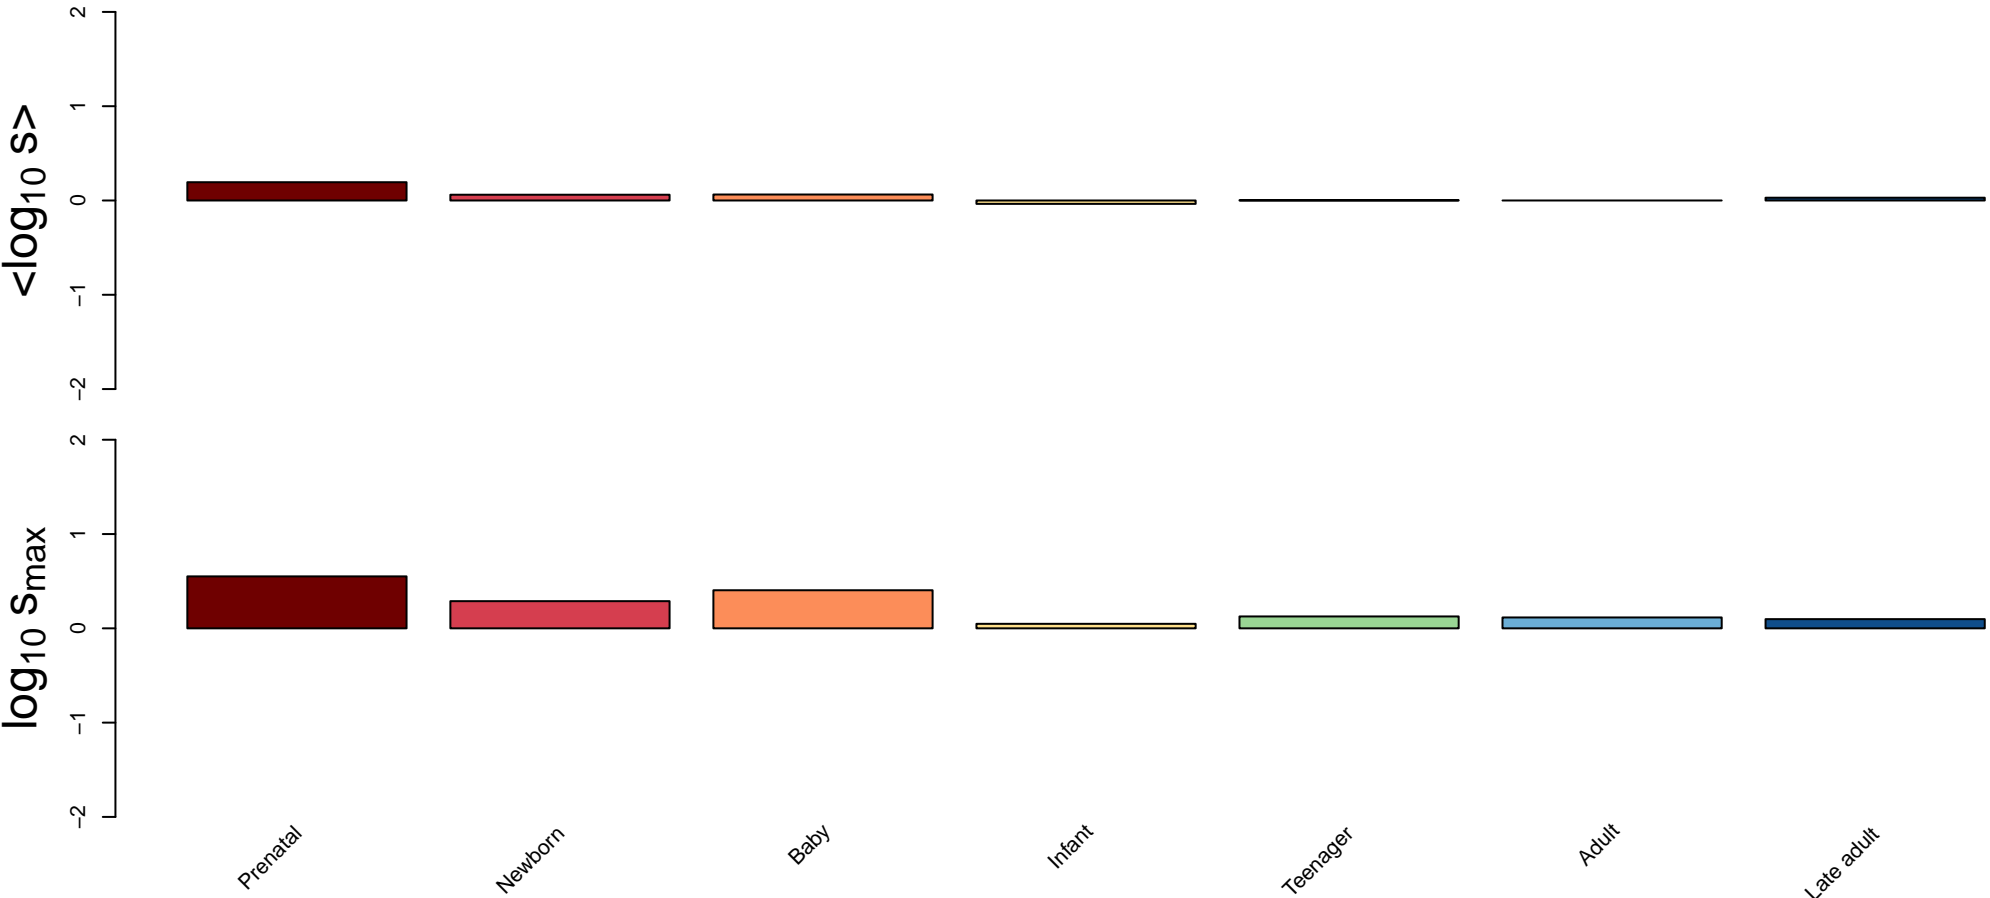



Estrogen\_signaling\_pathway  
sink nodes

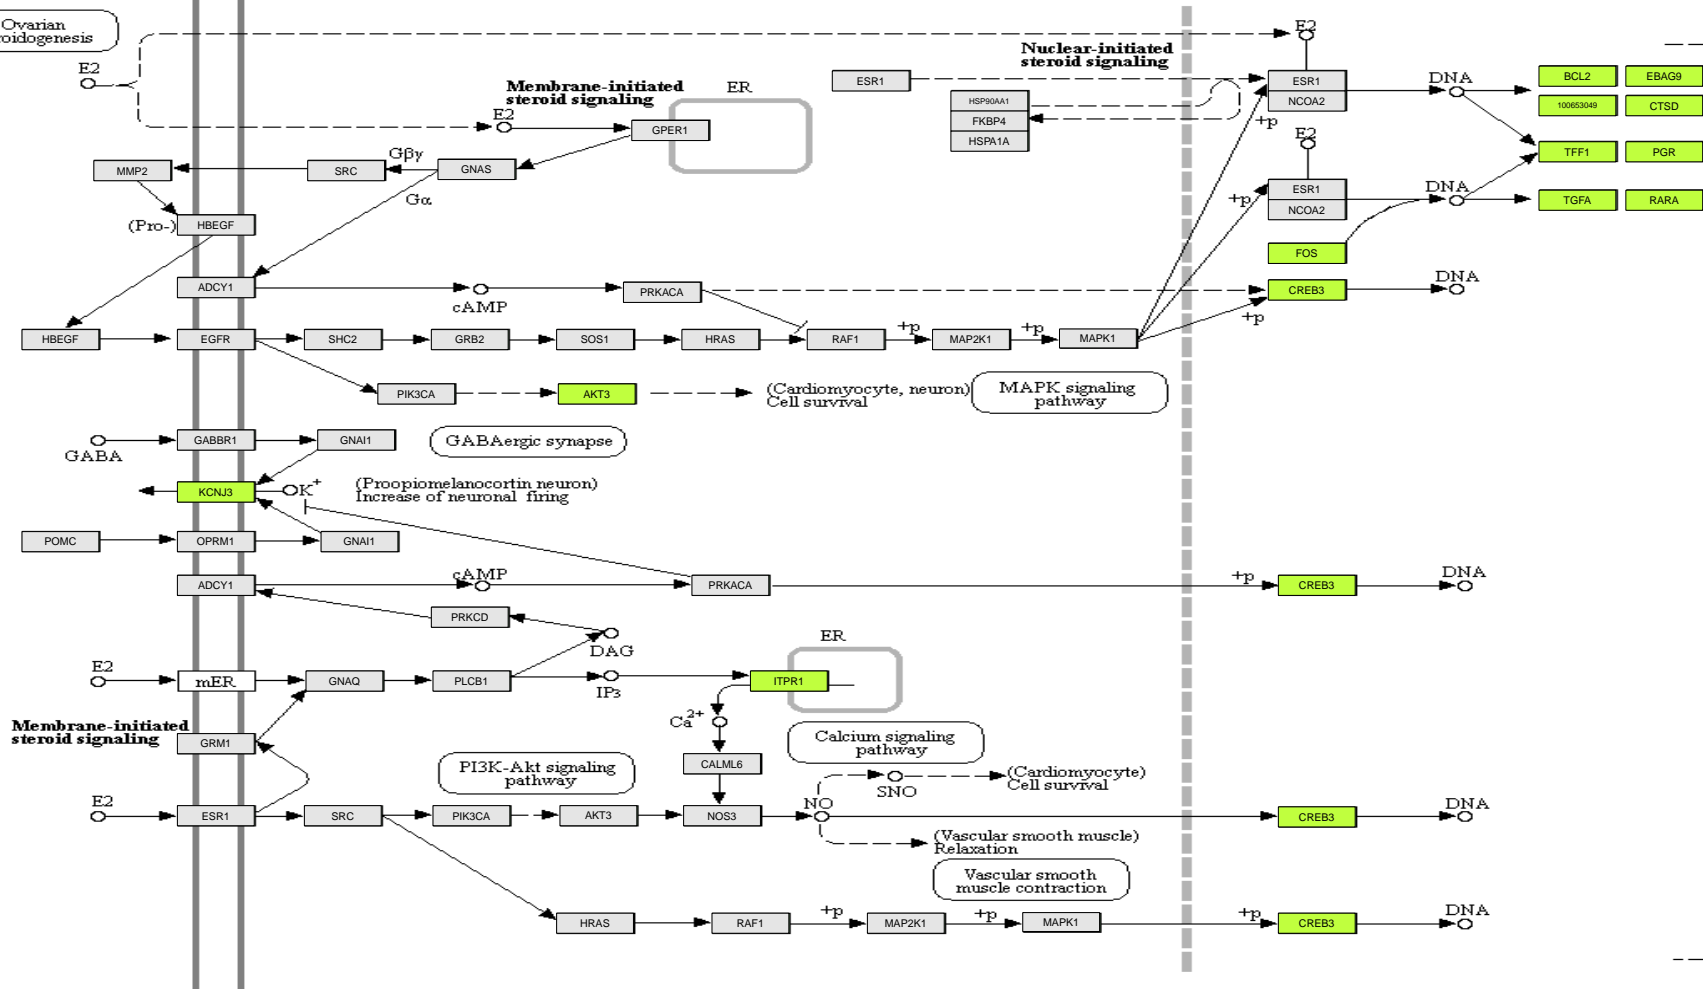

Estrogen\_signaling\_pathway  
Prenatal

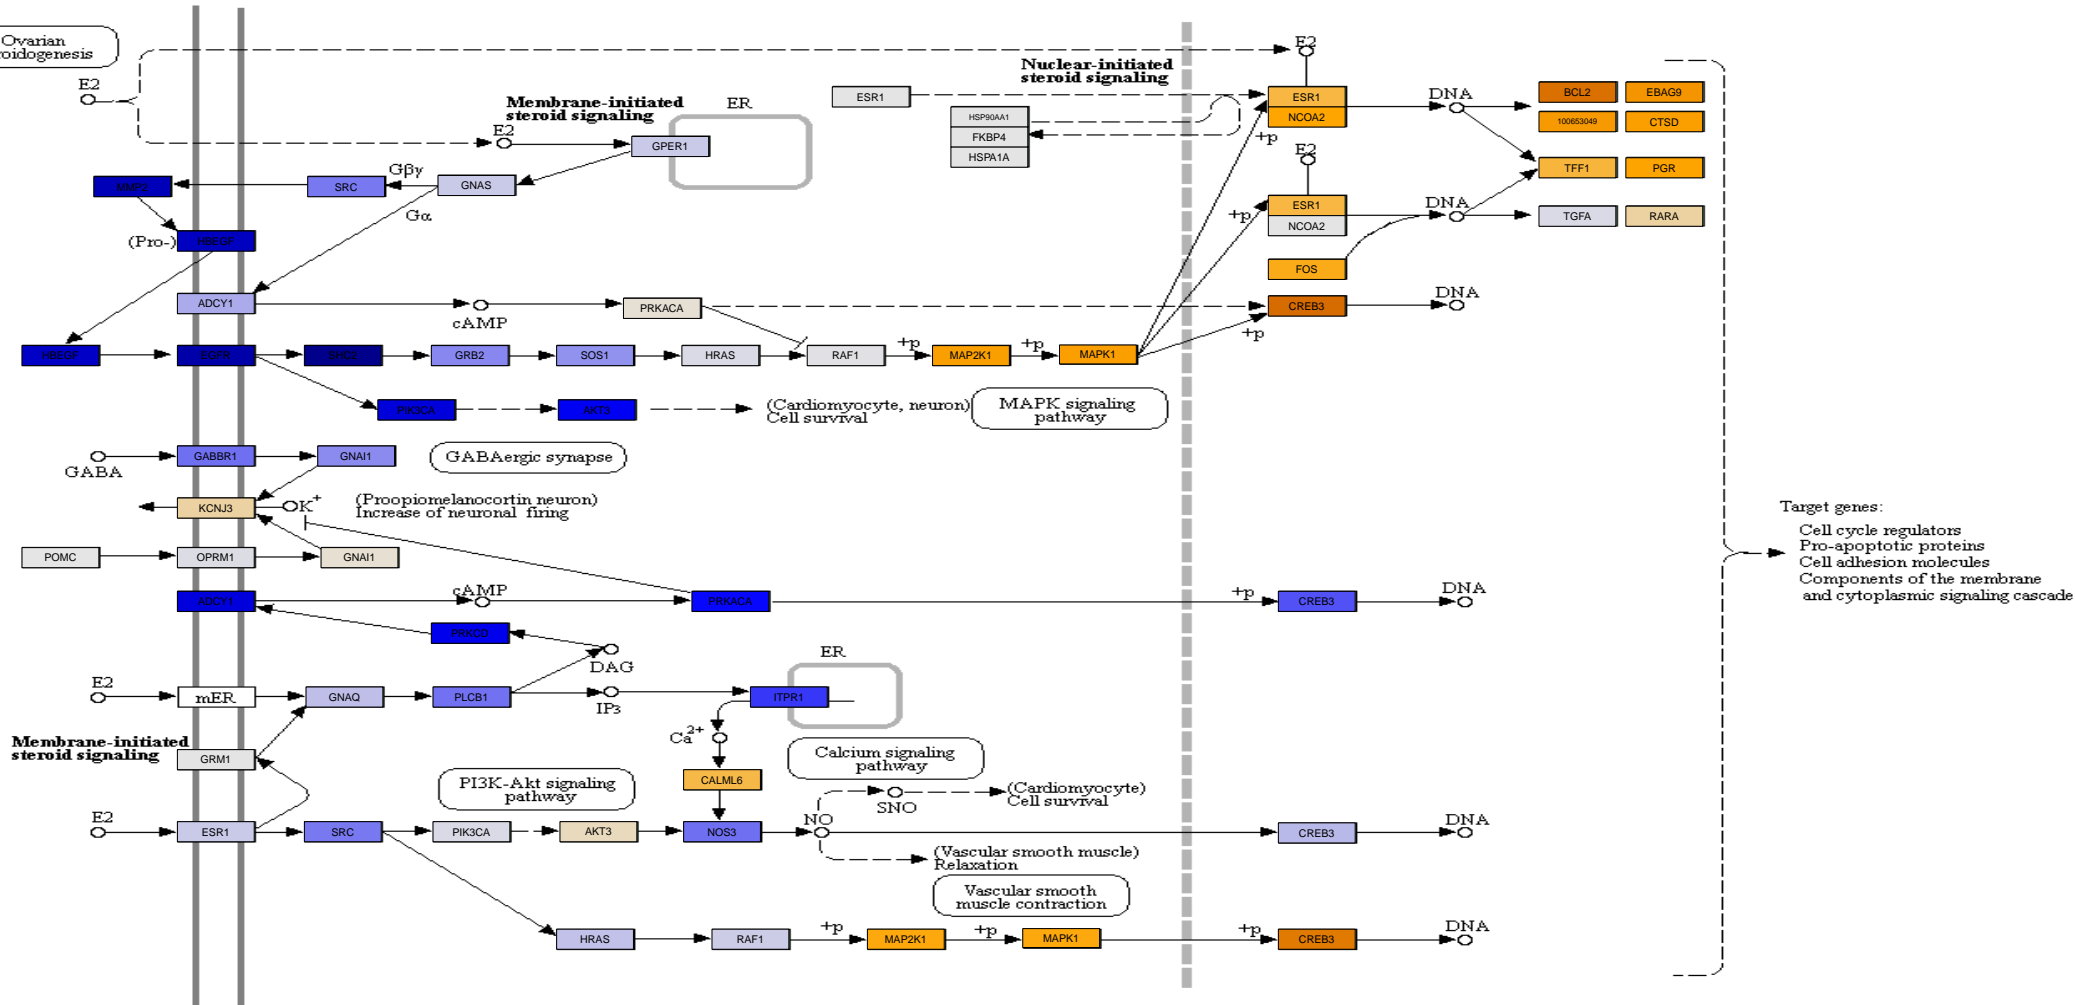

Estrogen signaling pathway  
Newborn

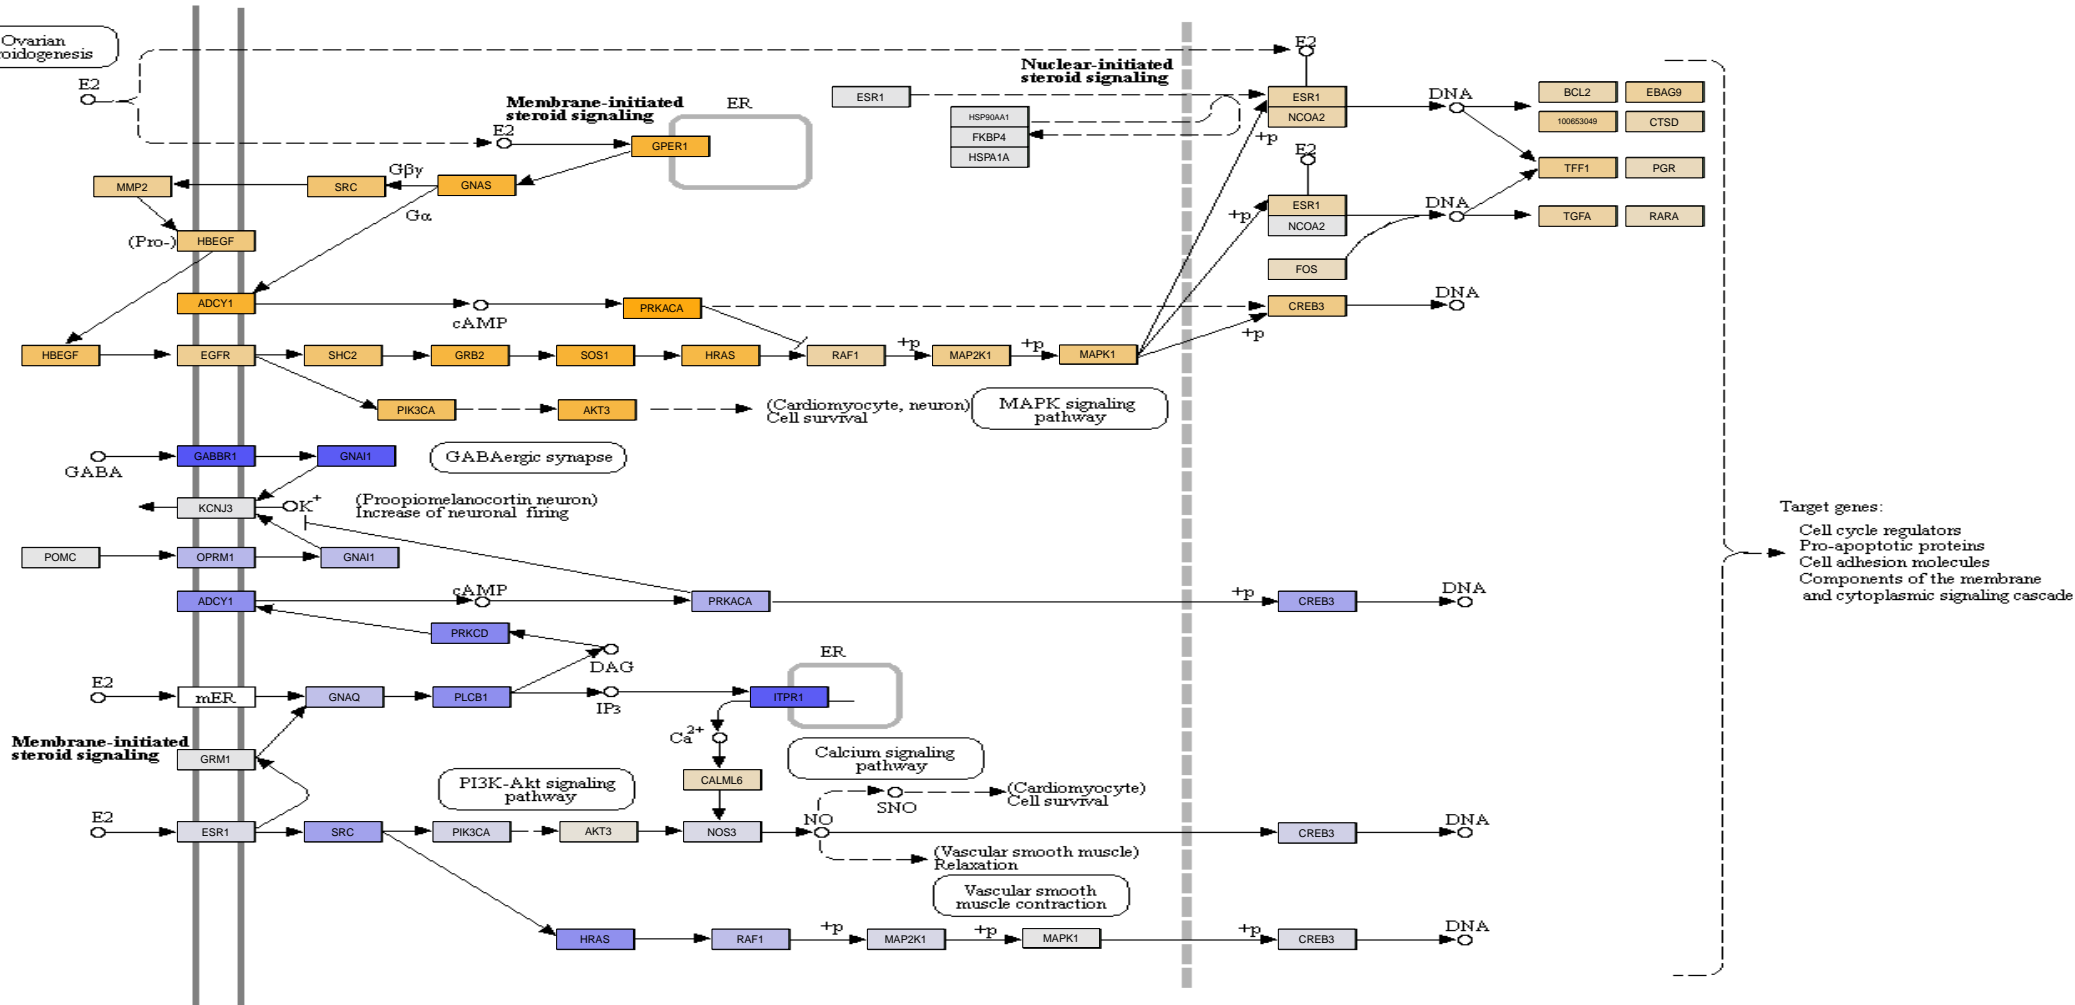



Estrogen\_signaling\_pathway  
Infant

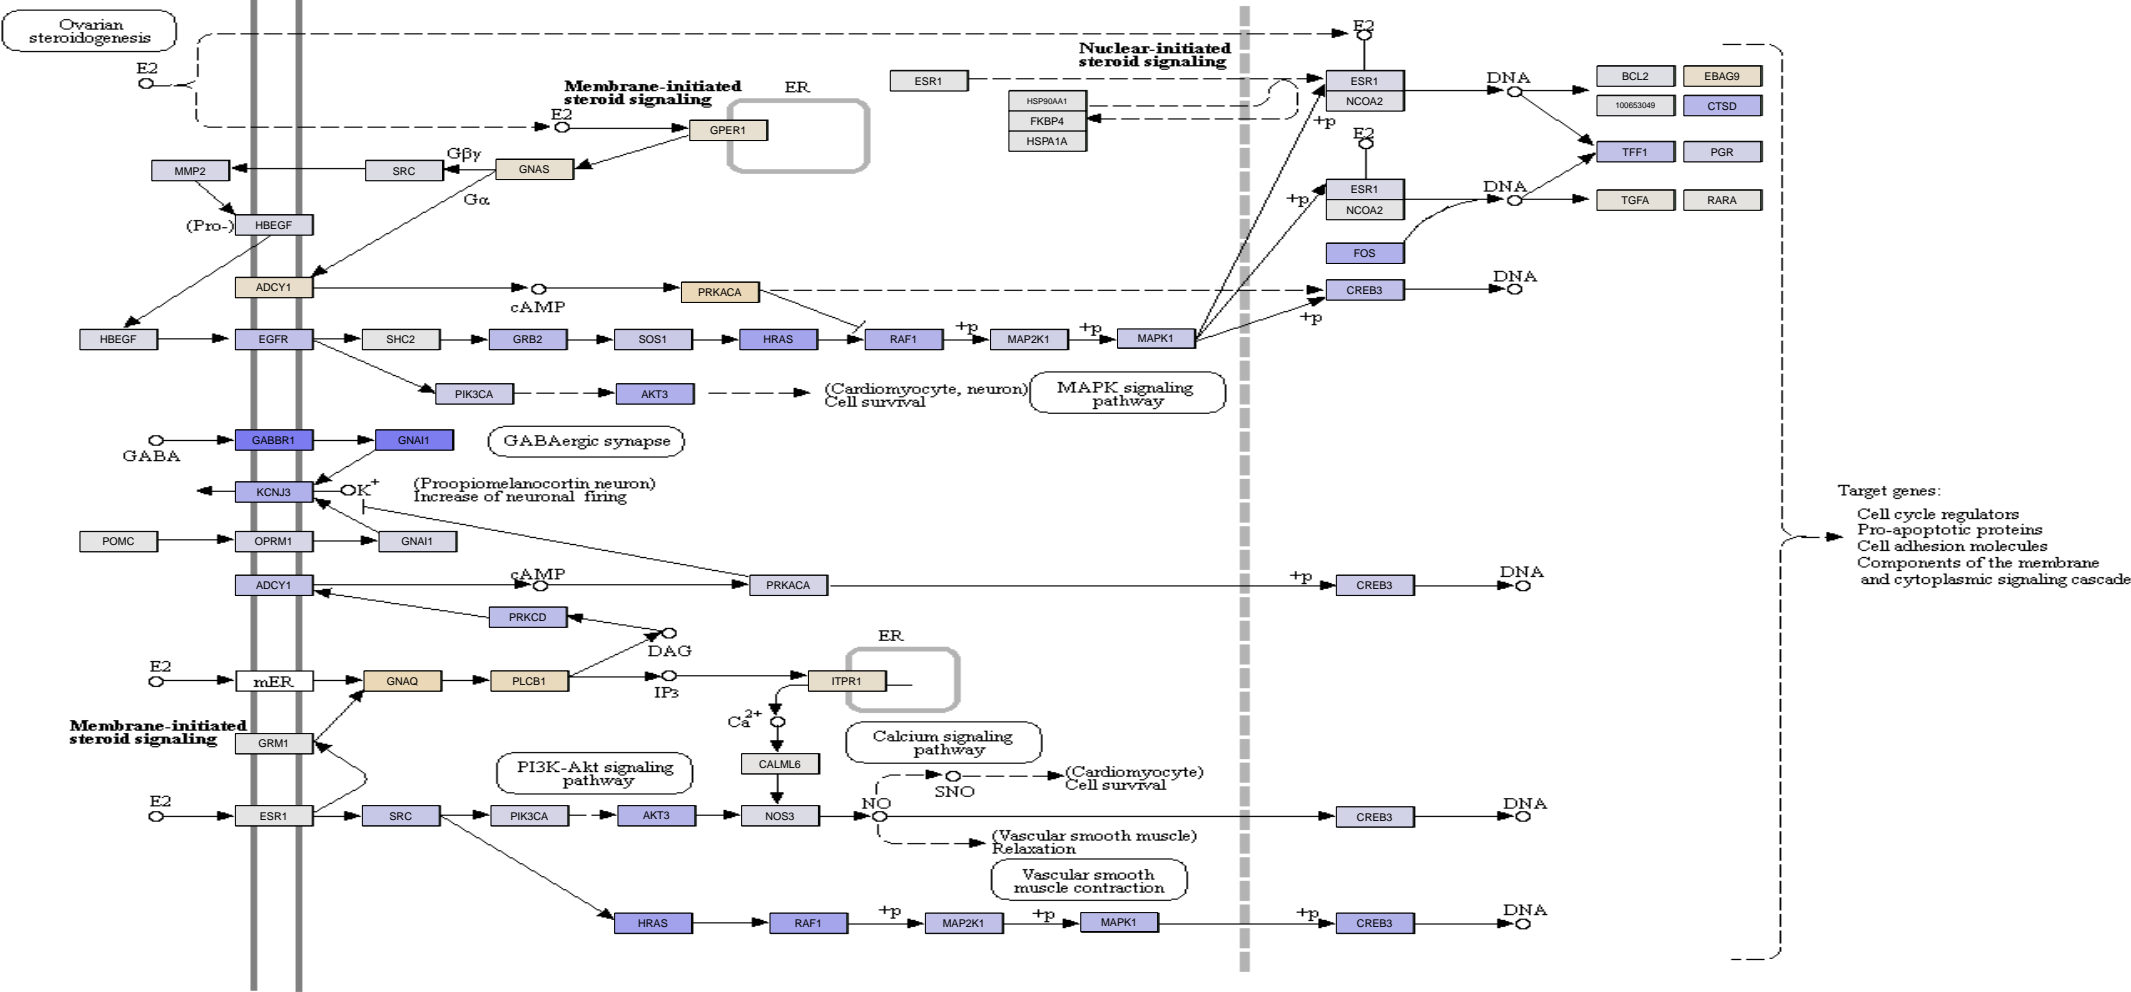

Estrogen signaling pathway  
Teenager

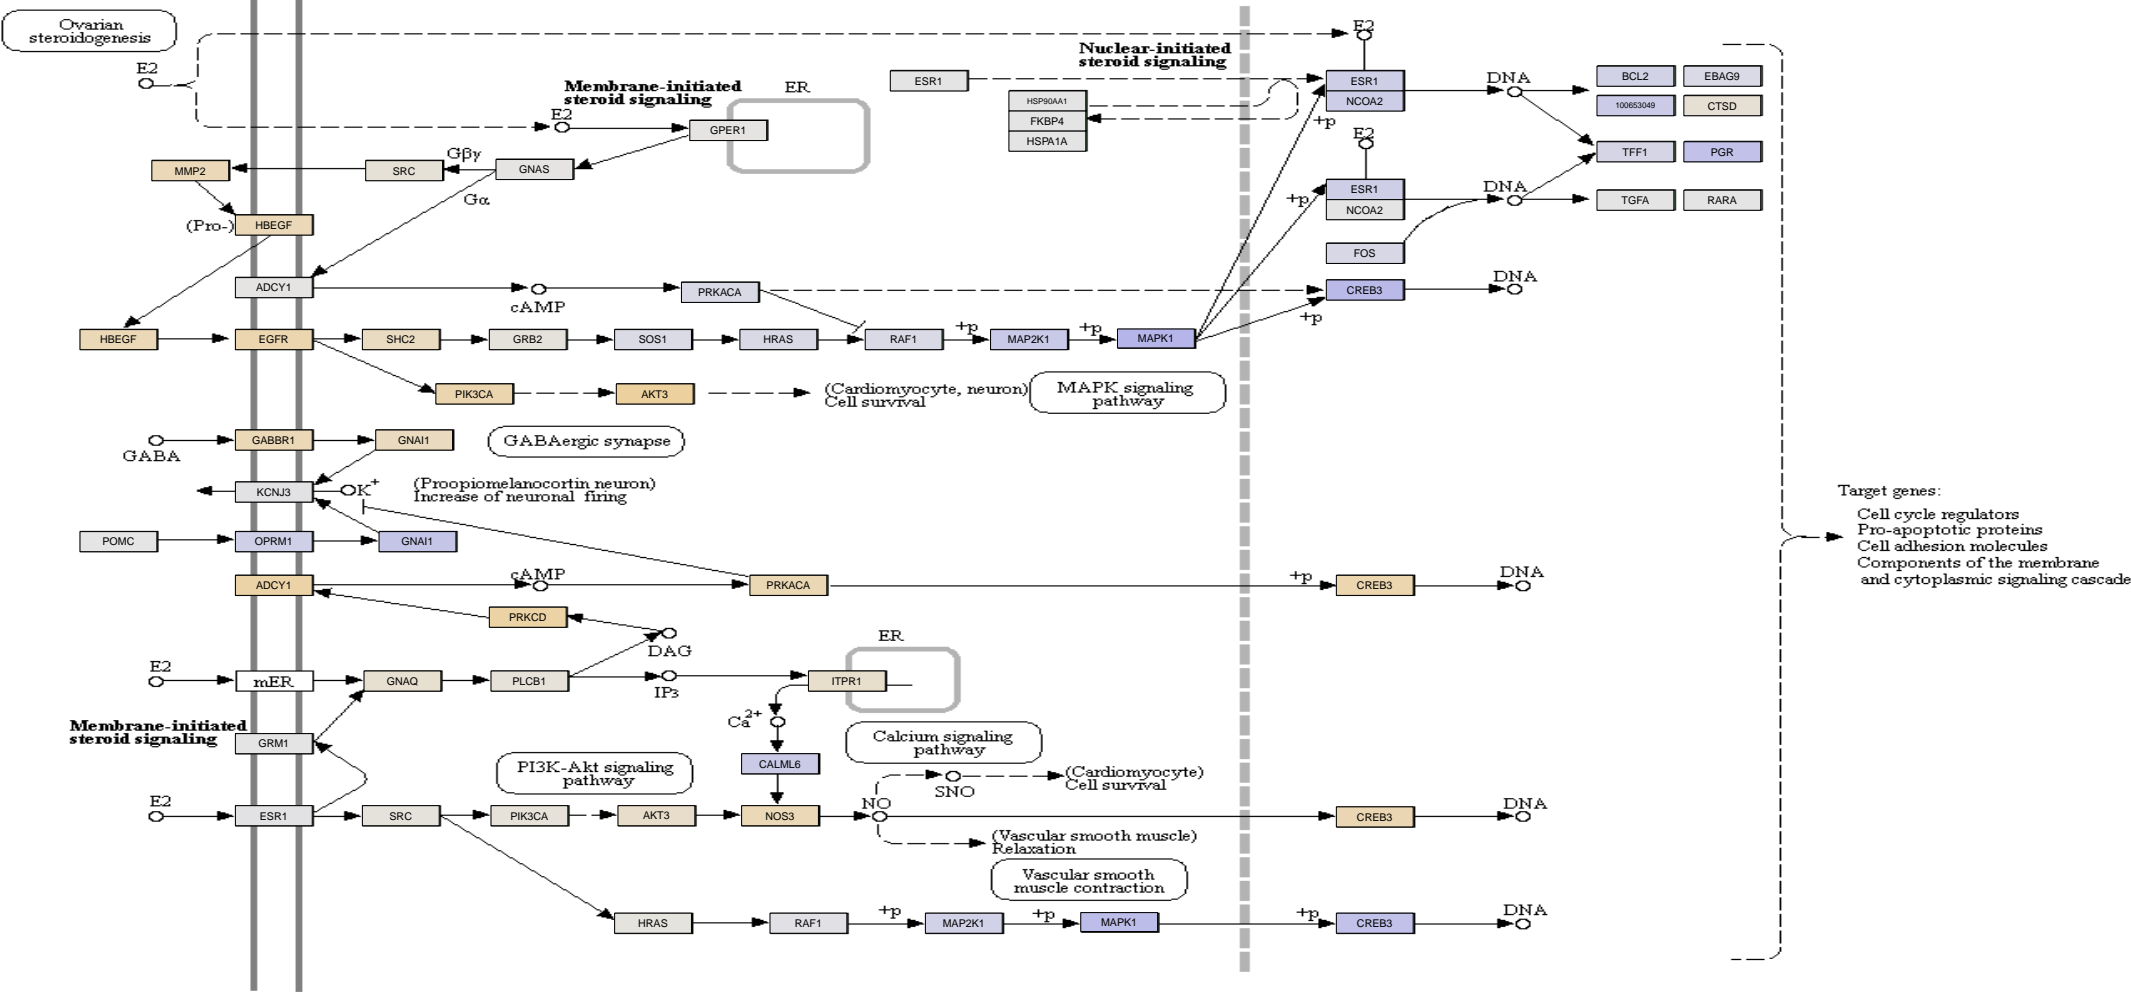



Estrogen\_signaling\_pathway  
Adult

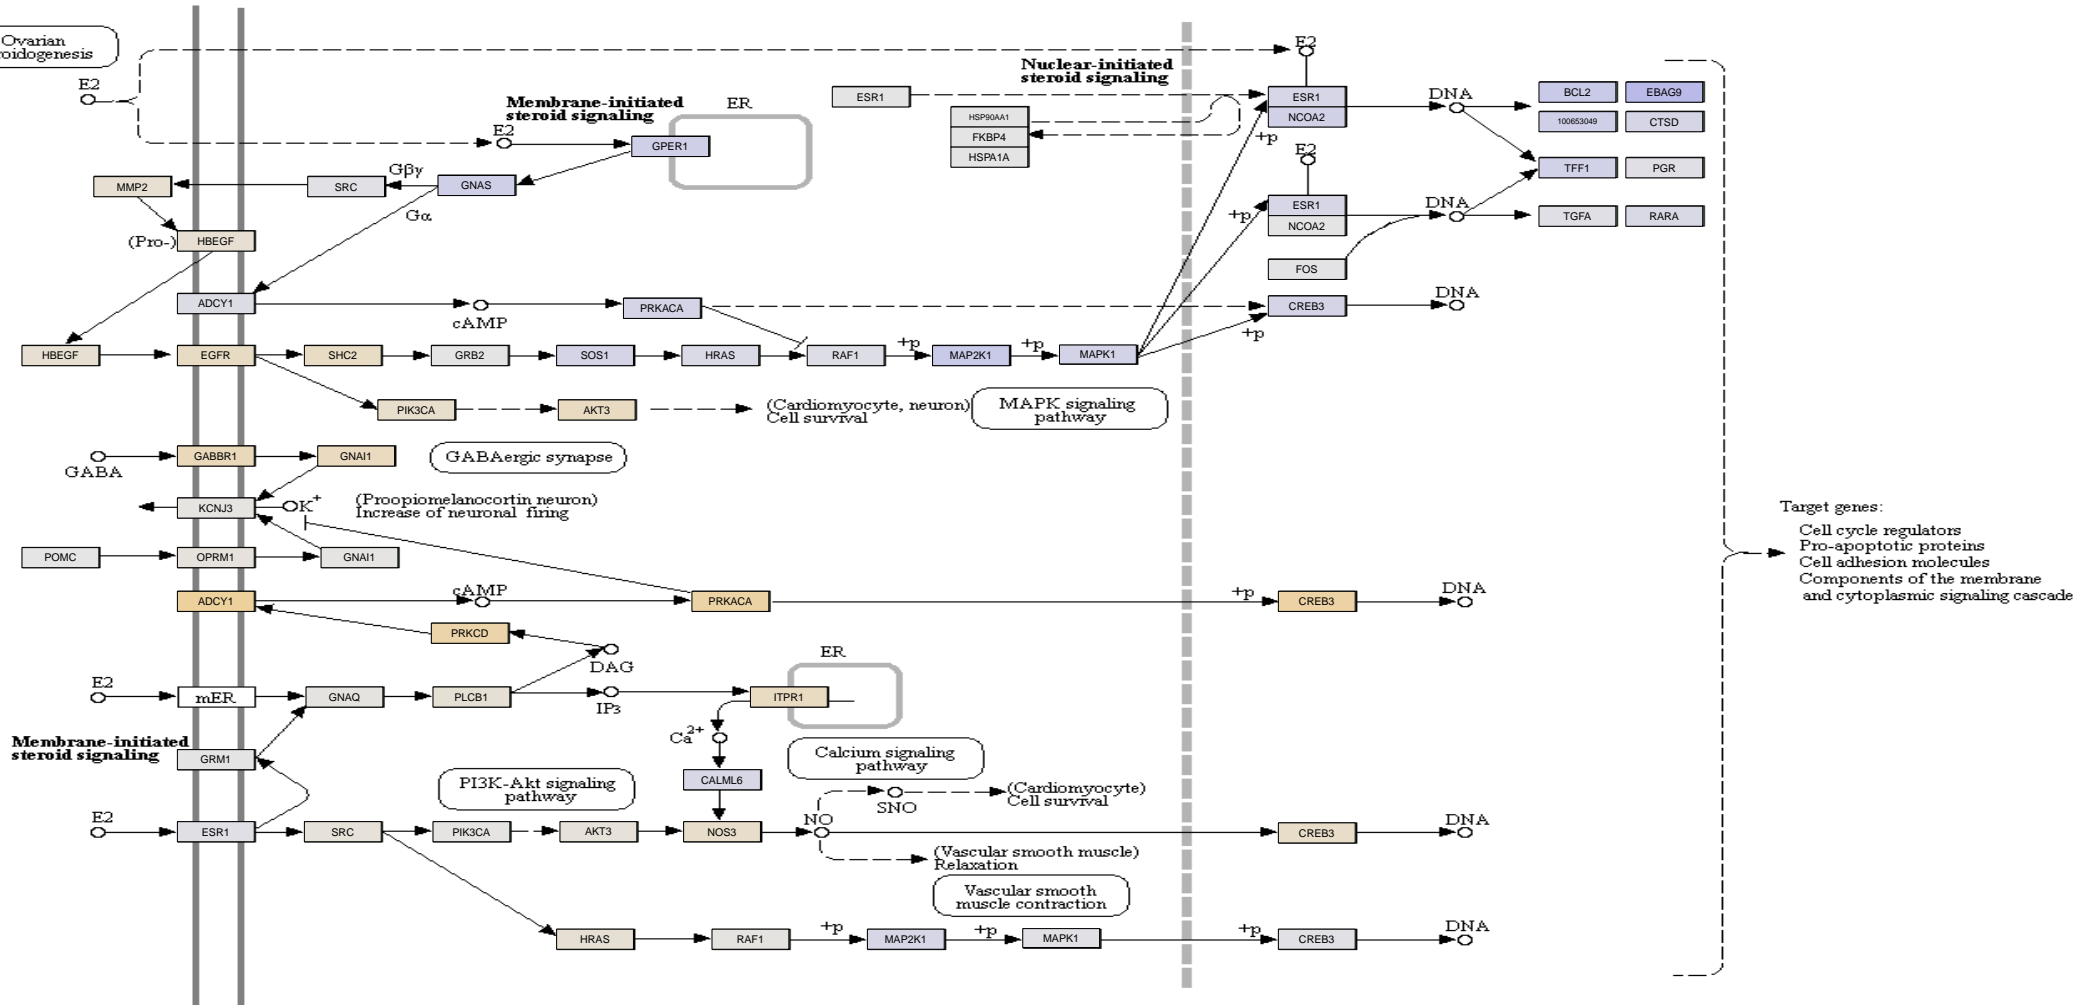

Supplement: s1 [file s1]
