# Supplementary material for: The Transcriptome and Methylome of the Developing and Aging Brain and Their Relations to Gliomas and Psychological Disorders
Source: MDPI journal article supplement (doi:10.3390/cells11030362), 2022-01-21

Hippo signaling pathway

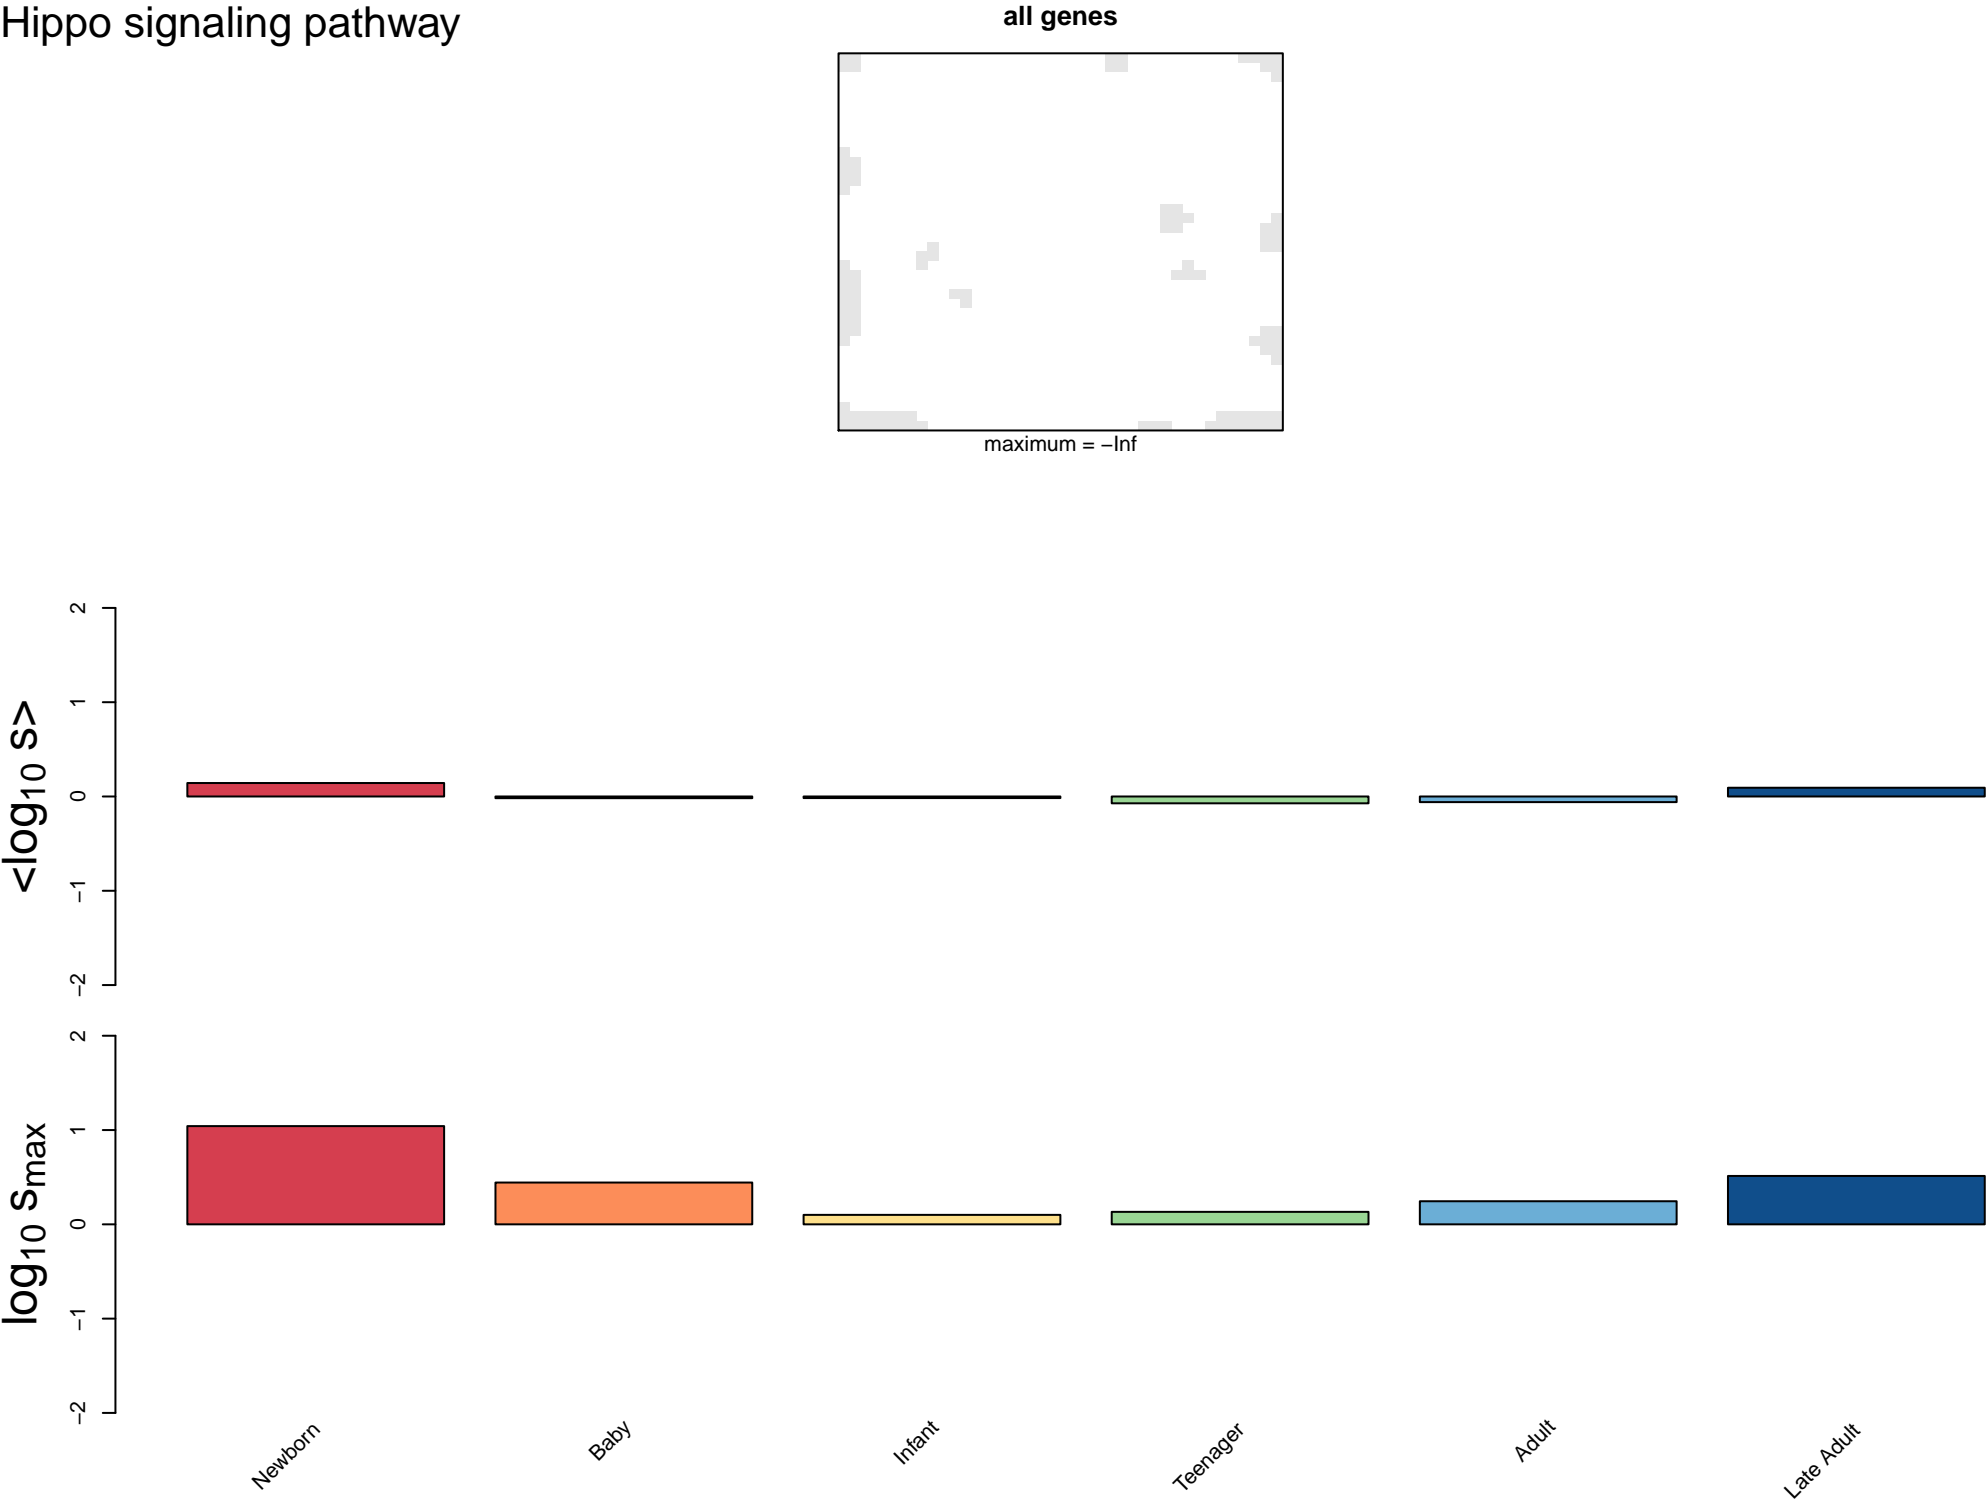

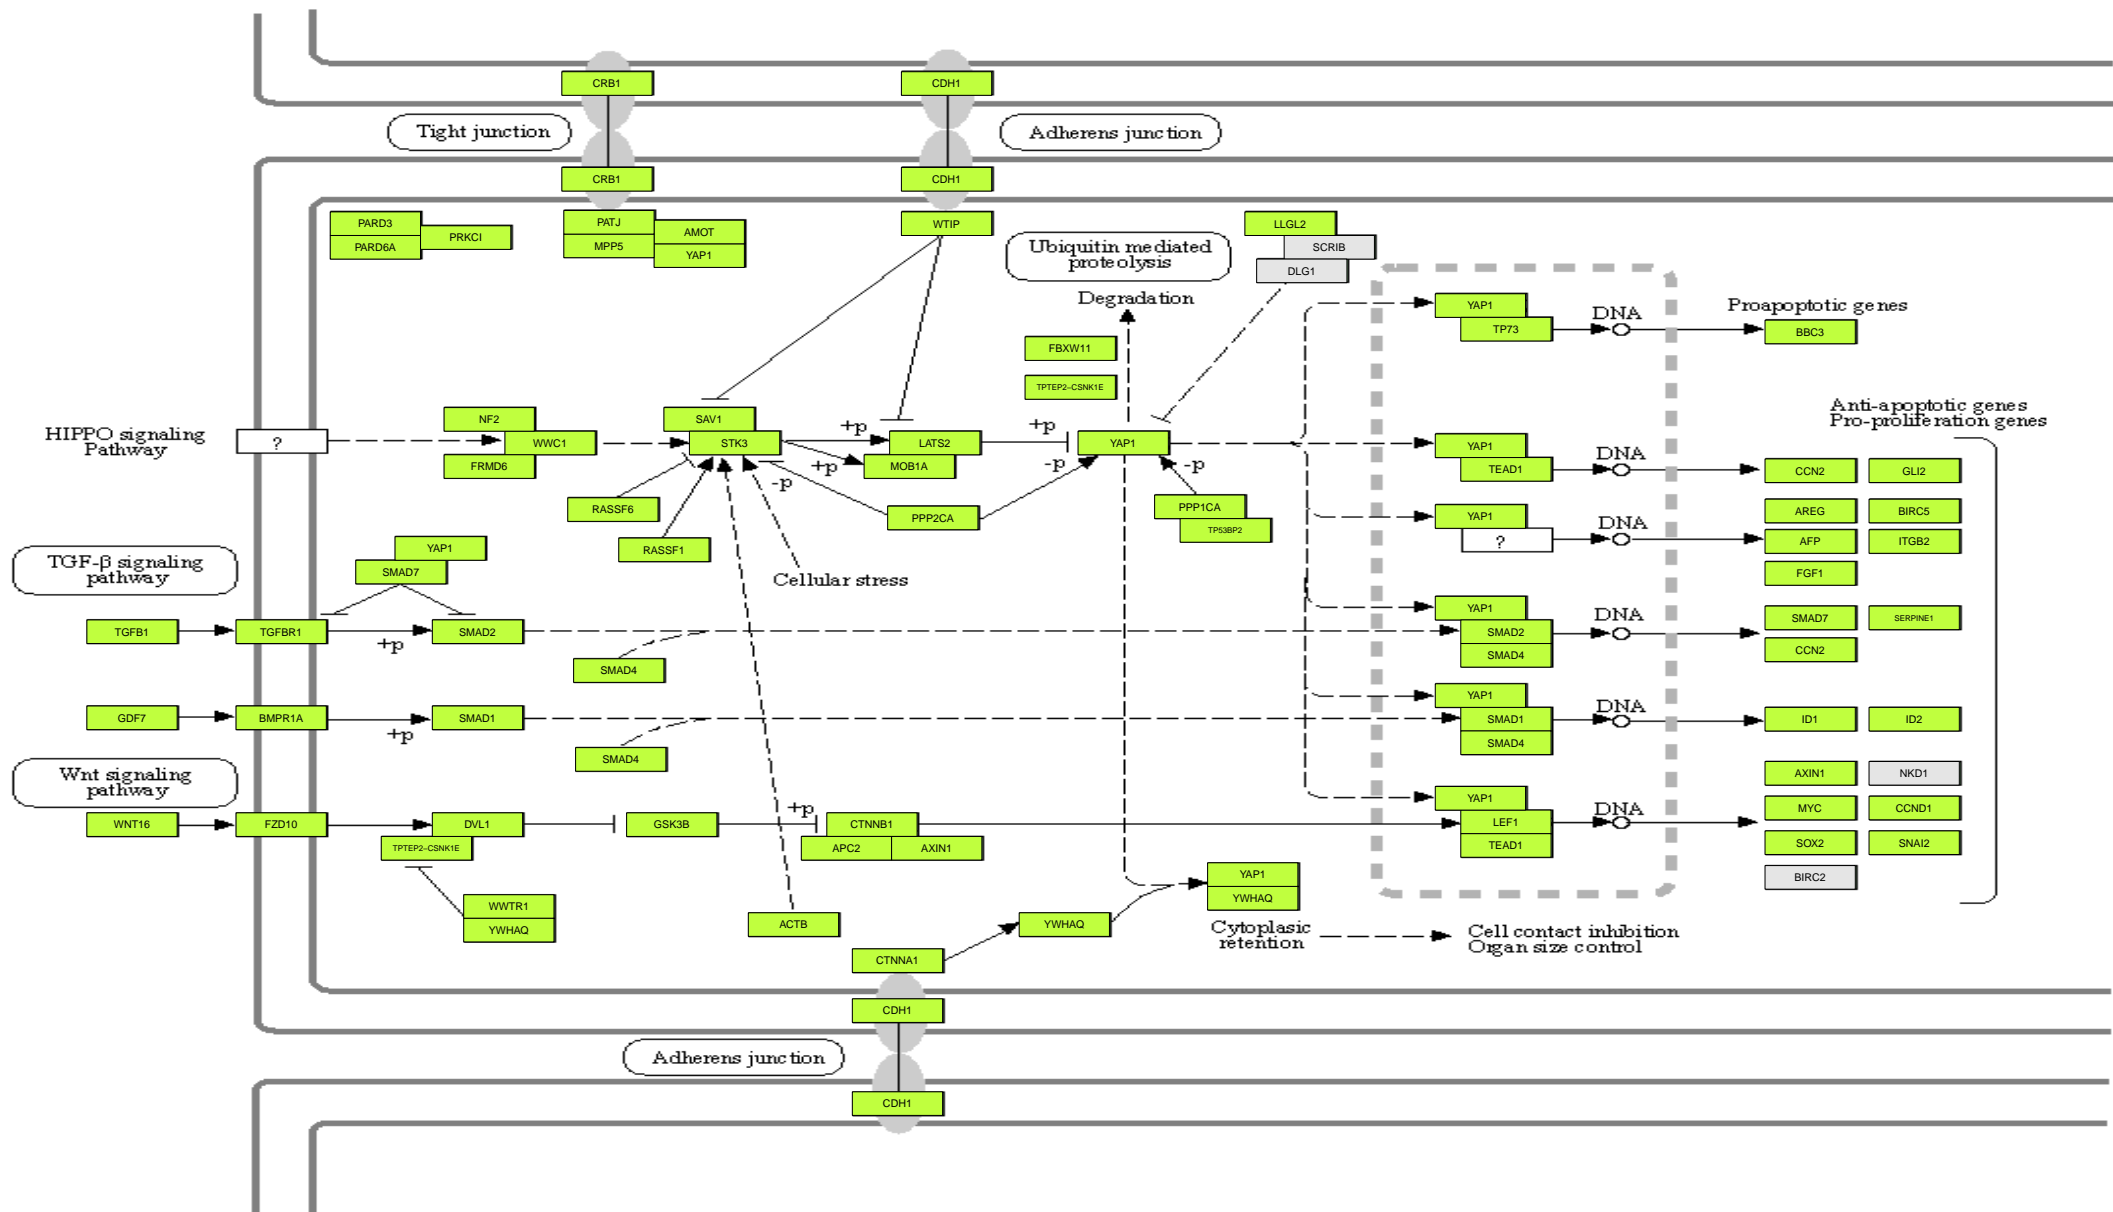

Hippo\_signaling\_pathway  
sink nodes

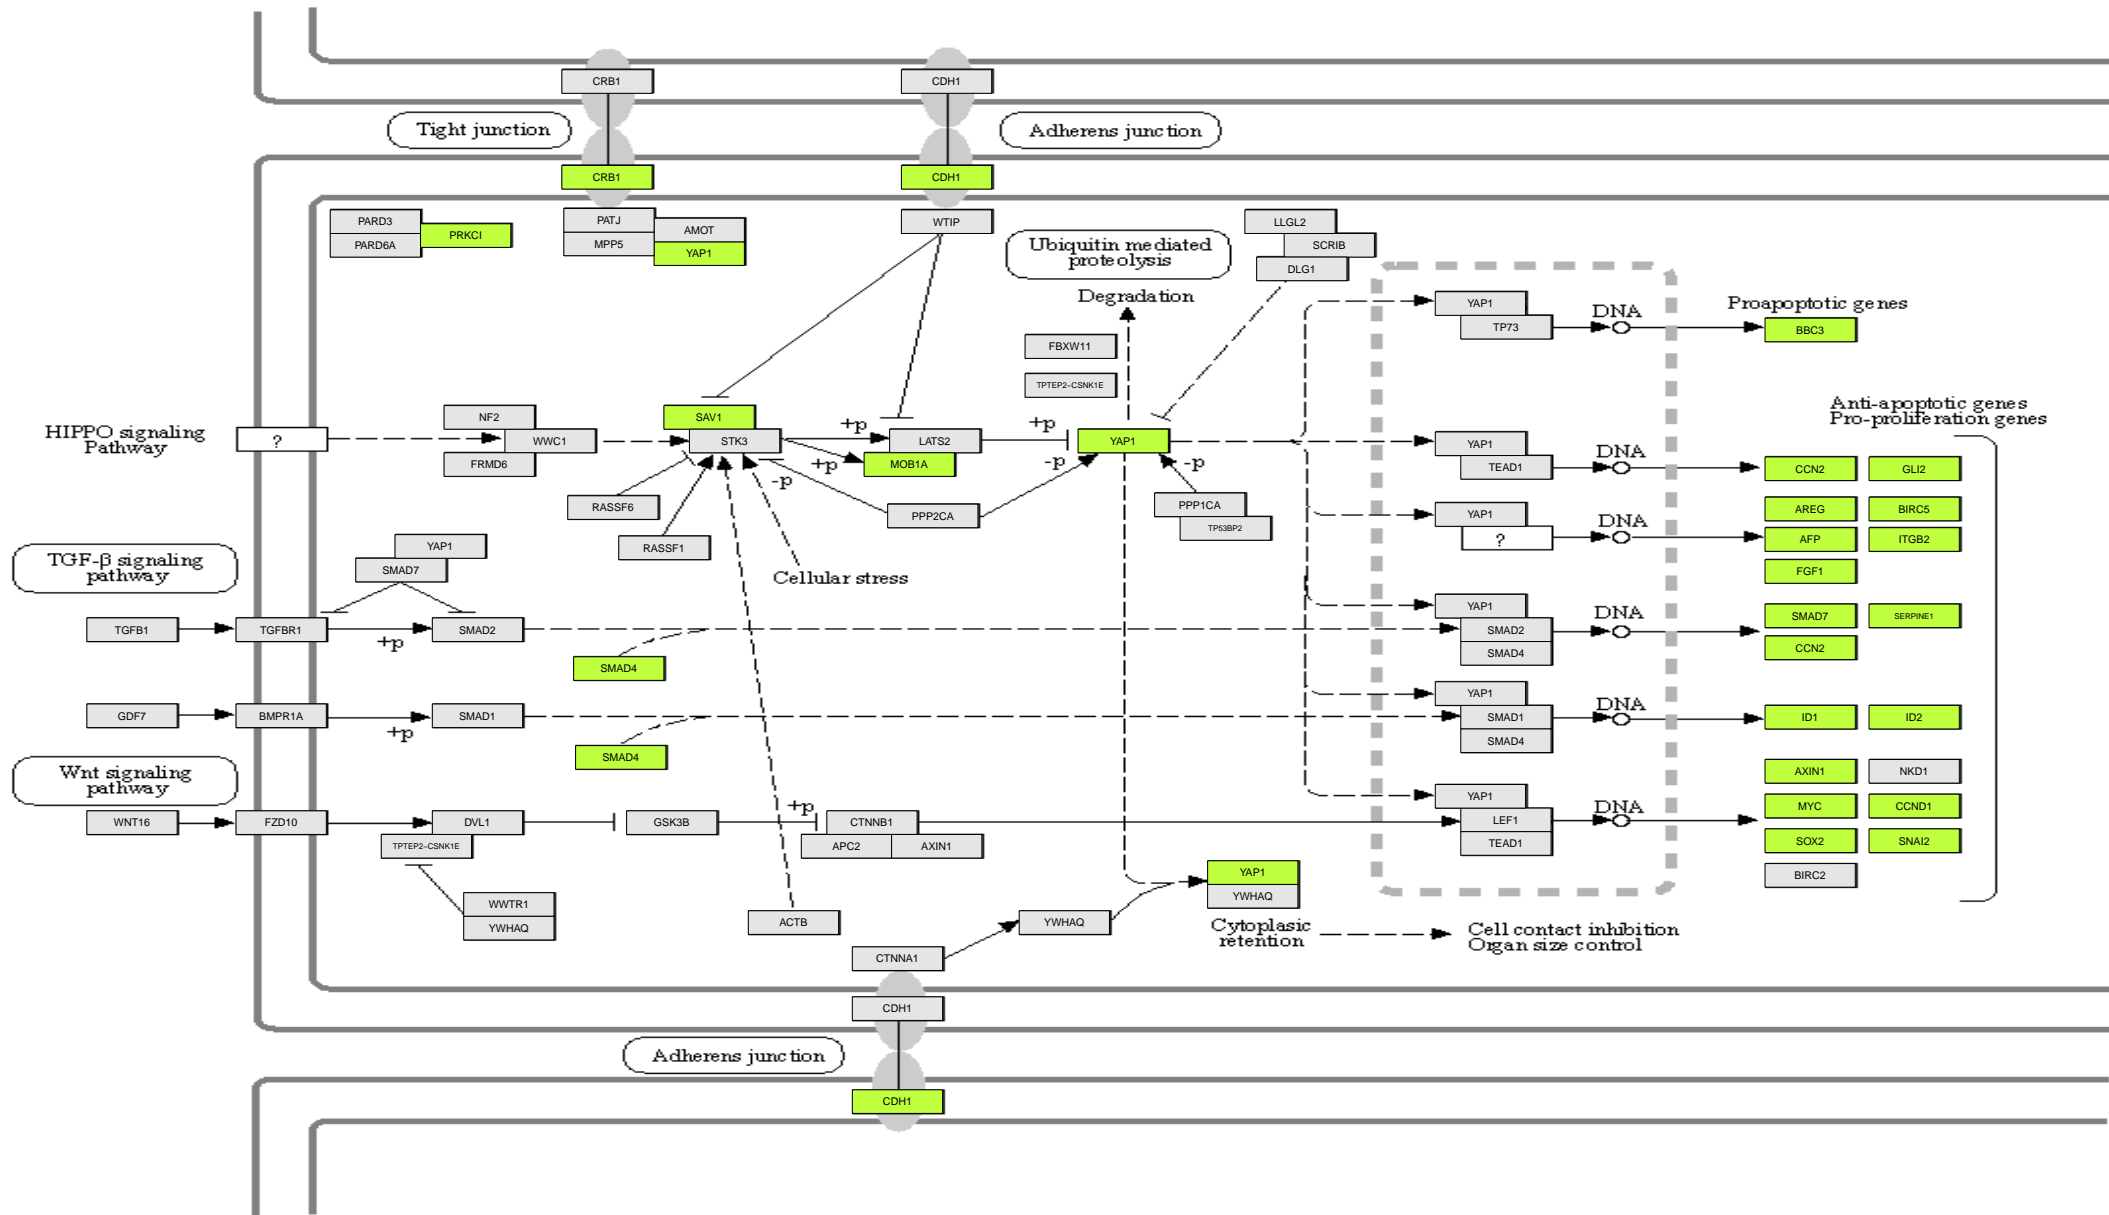

Hippo\_signaling\_pathway  
Newborn

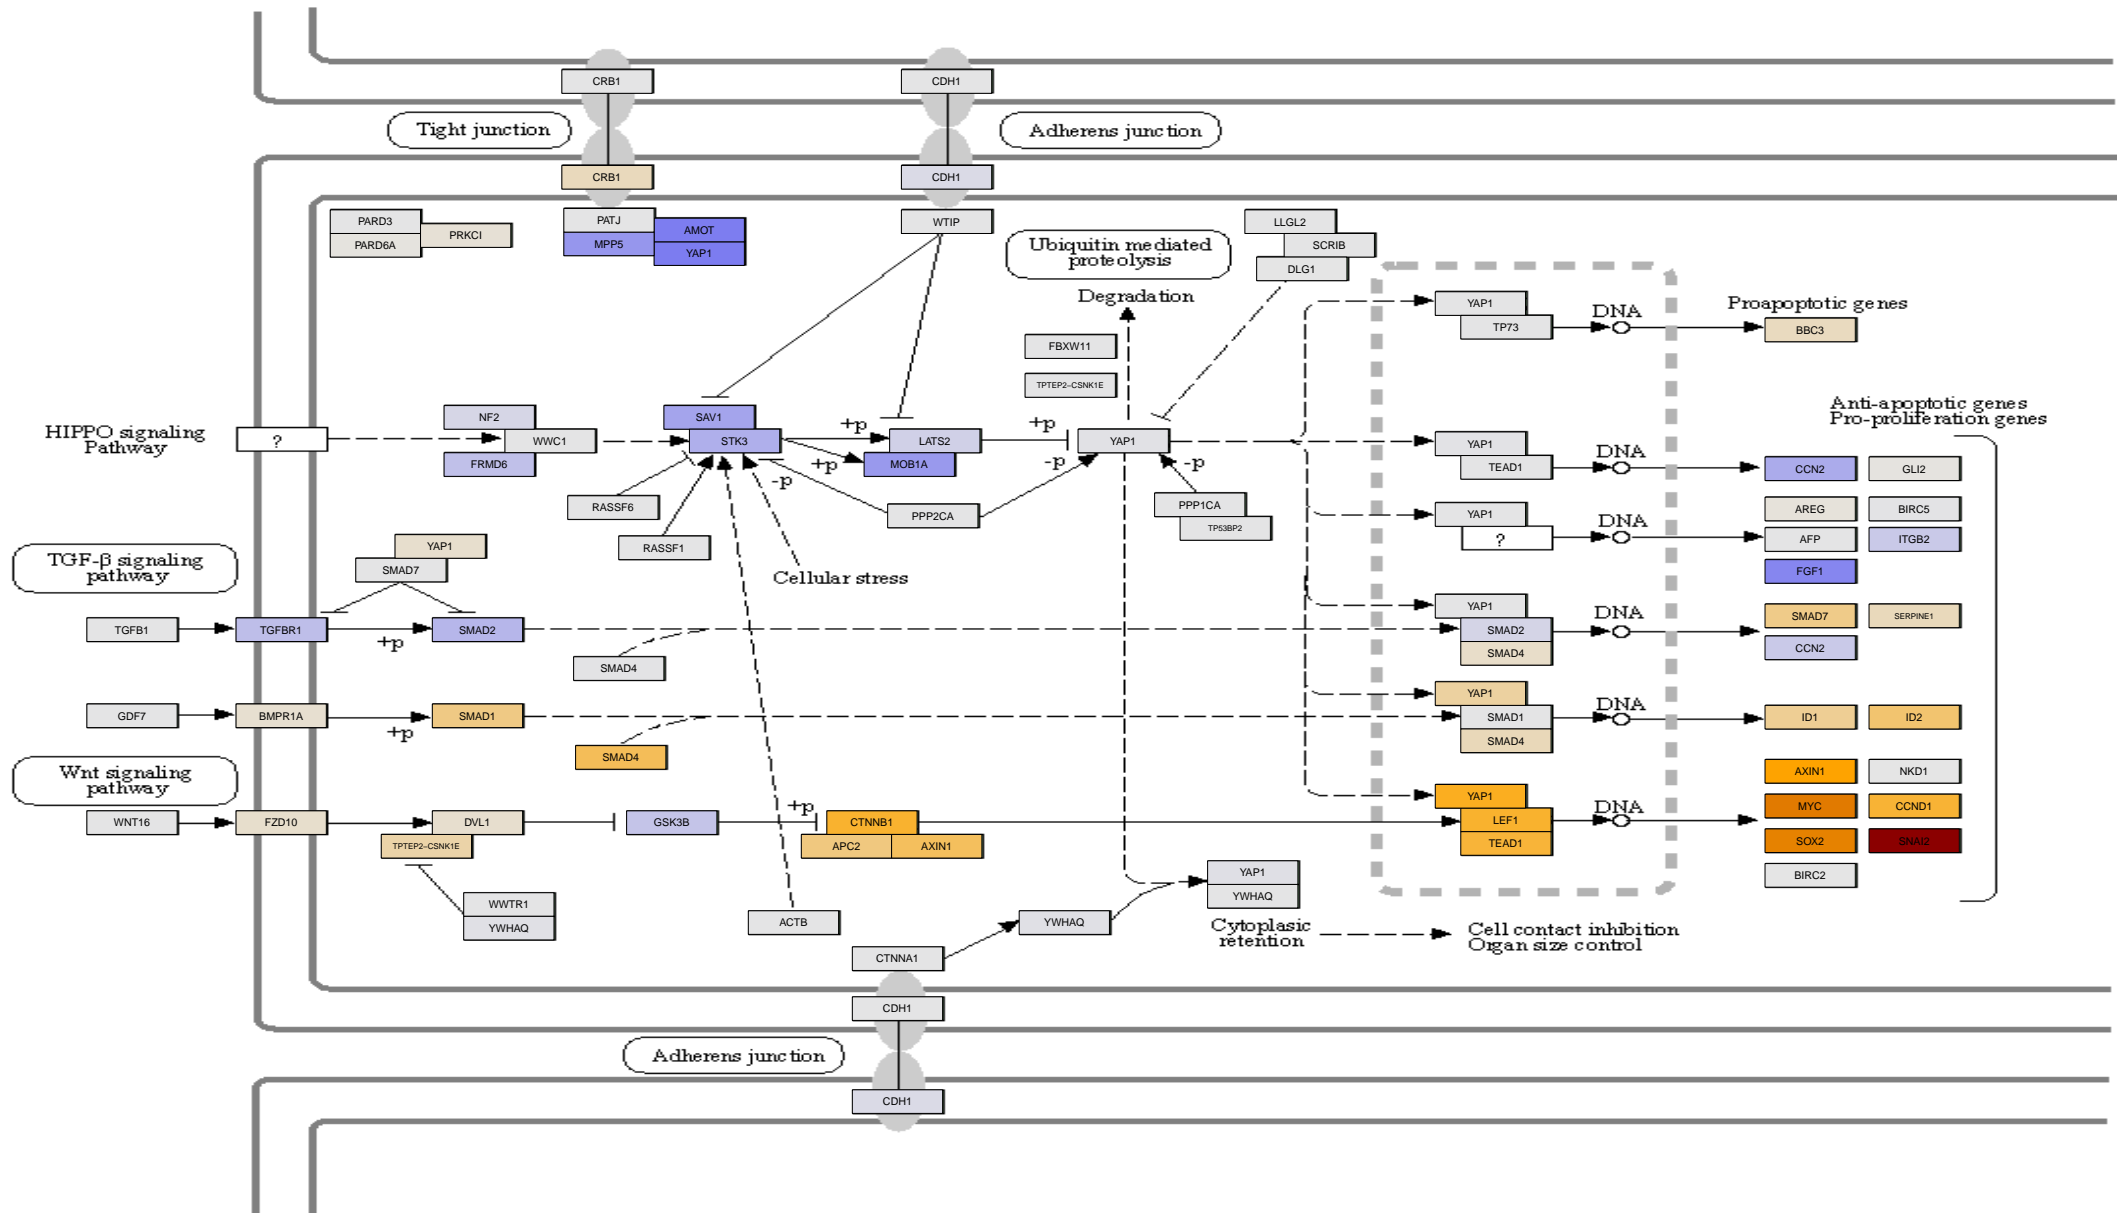

Hippo\_signaling\_pathway  
Baby

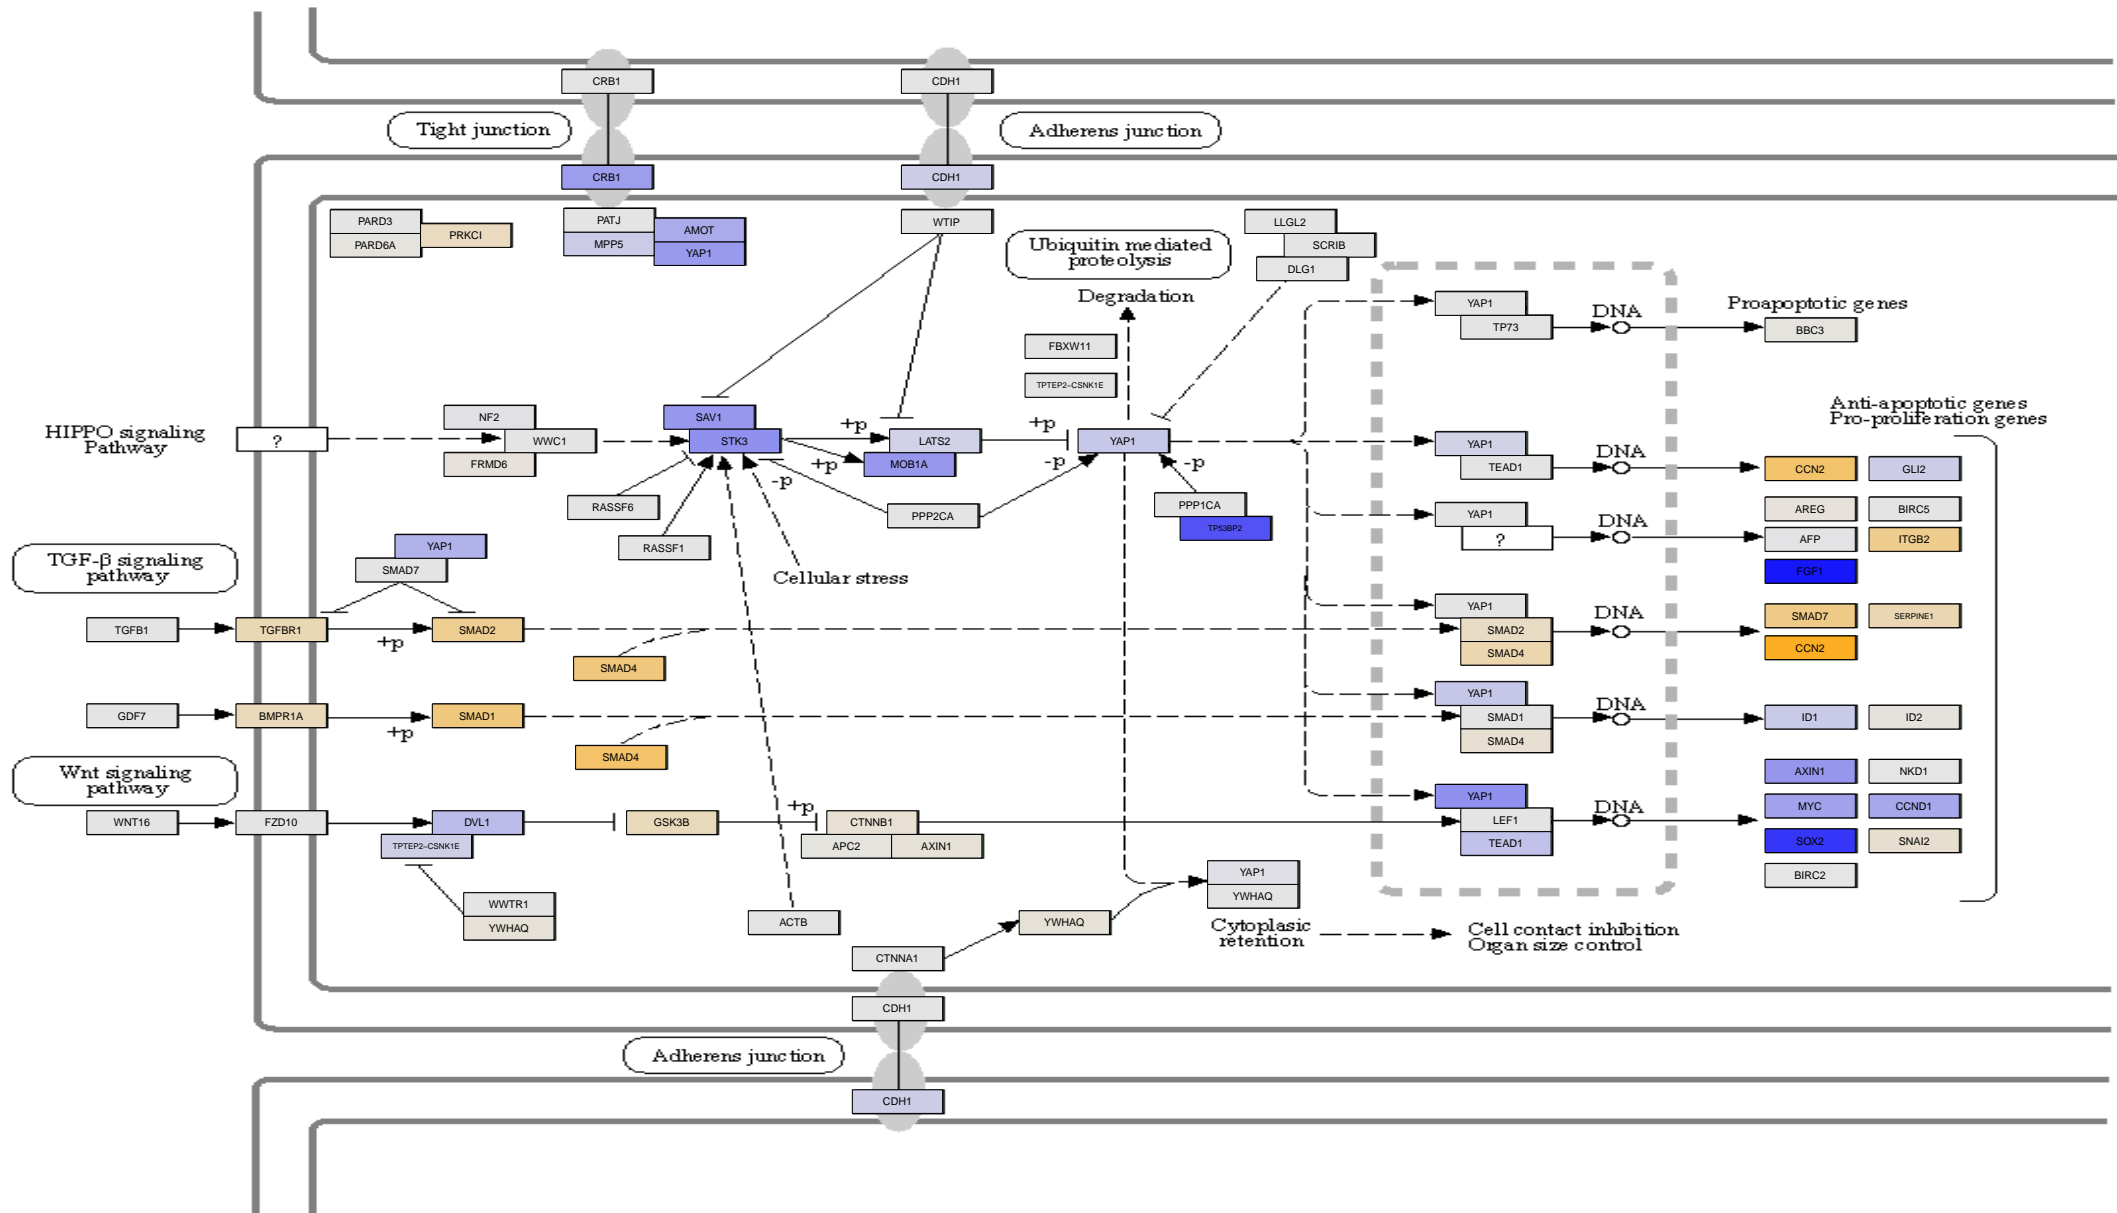

Hippo\_signaling\_pathway  
Infant

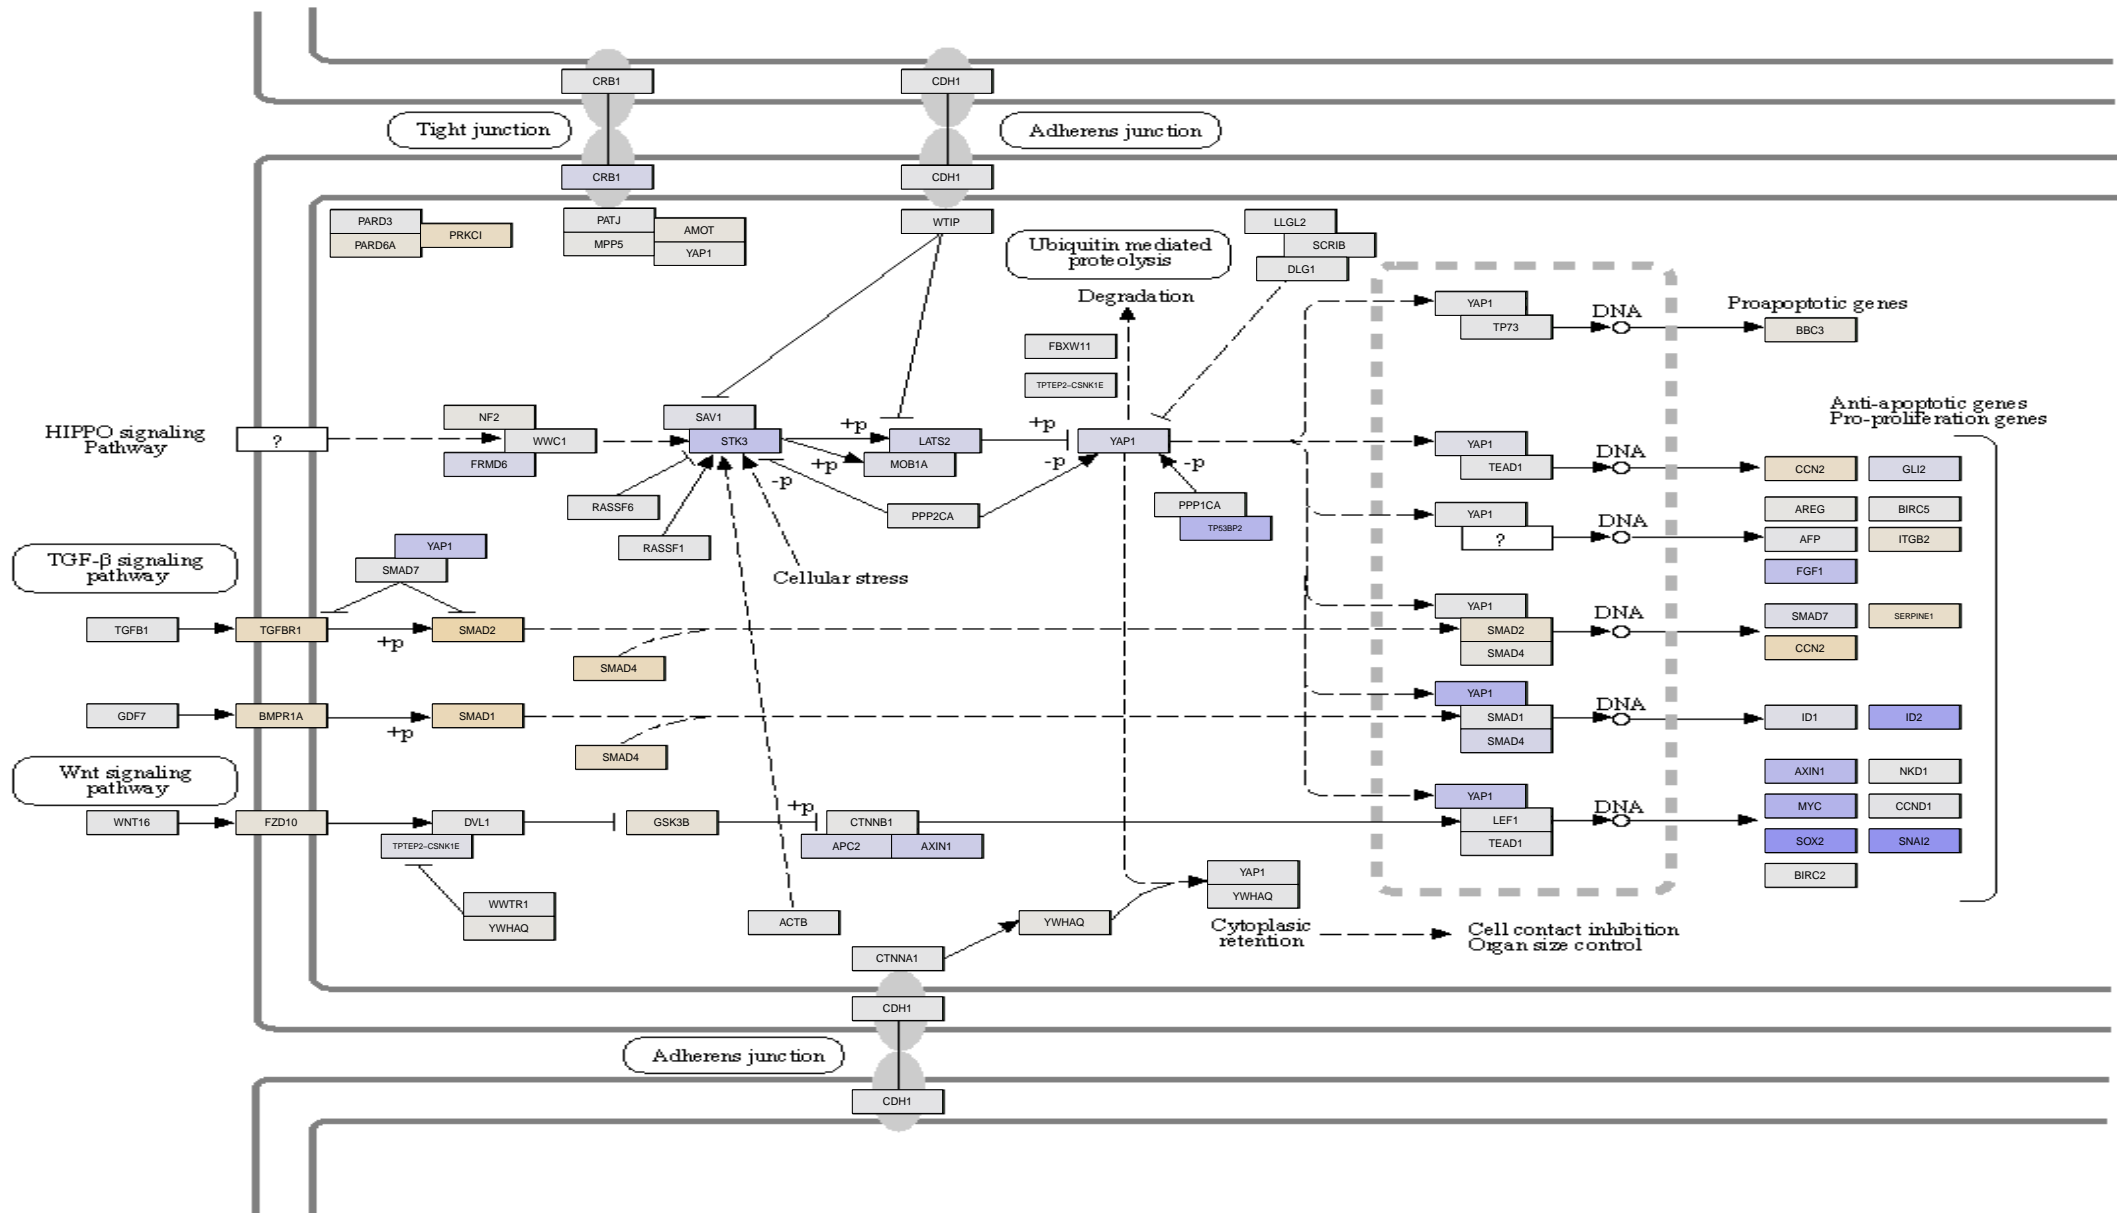

Hippo\_signaling\_pathway  
Teenager

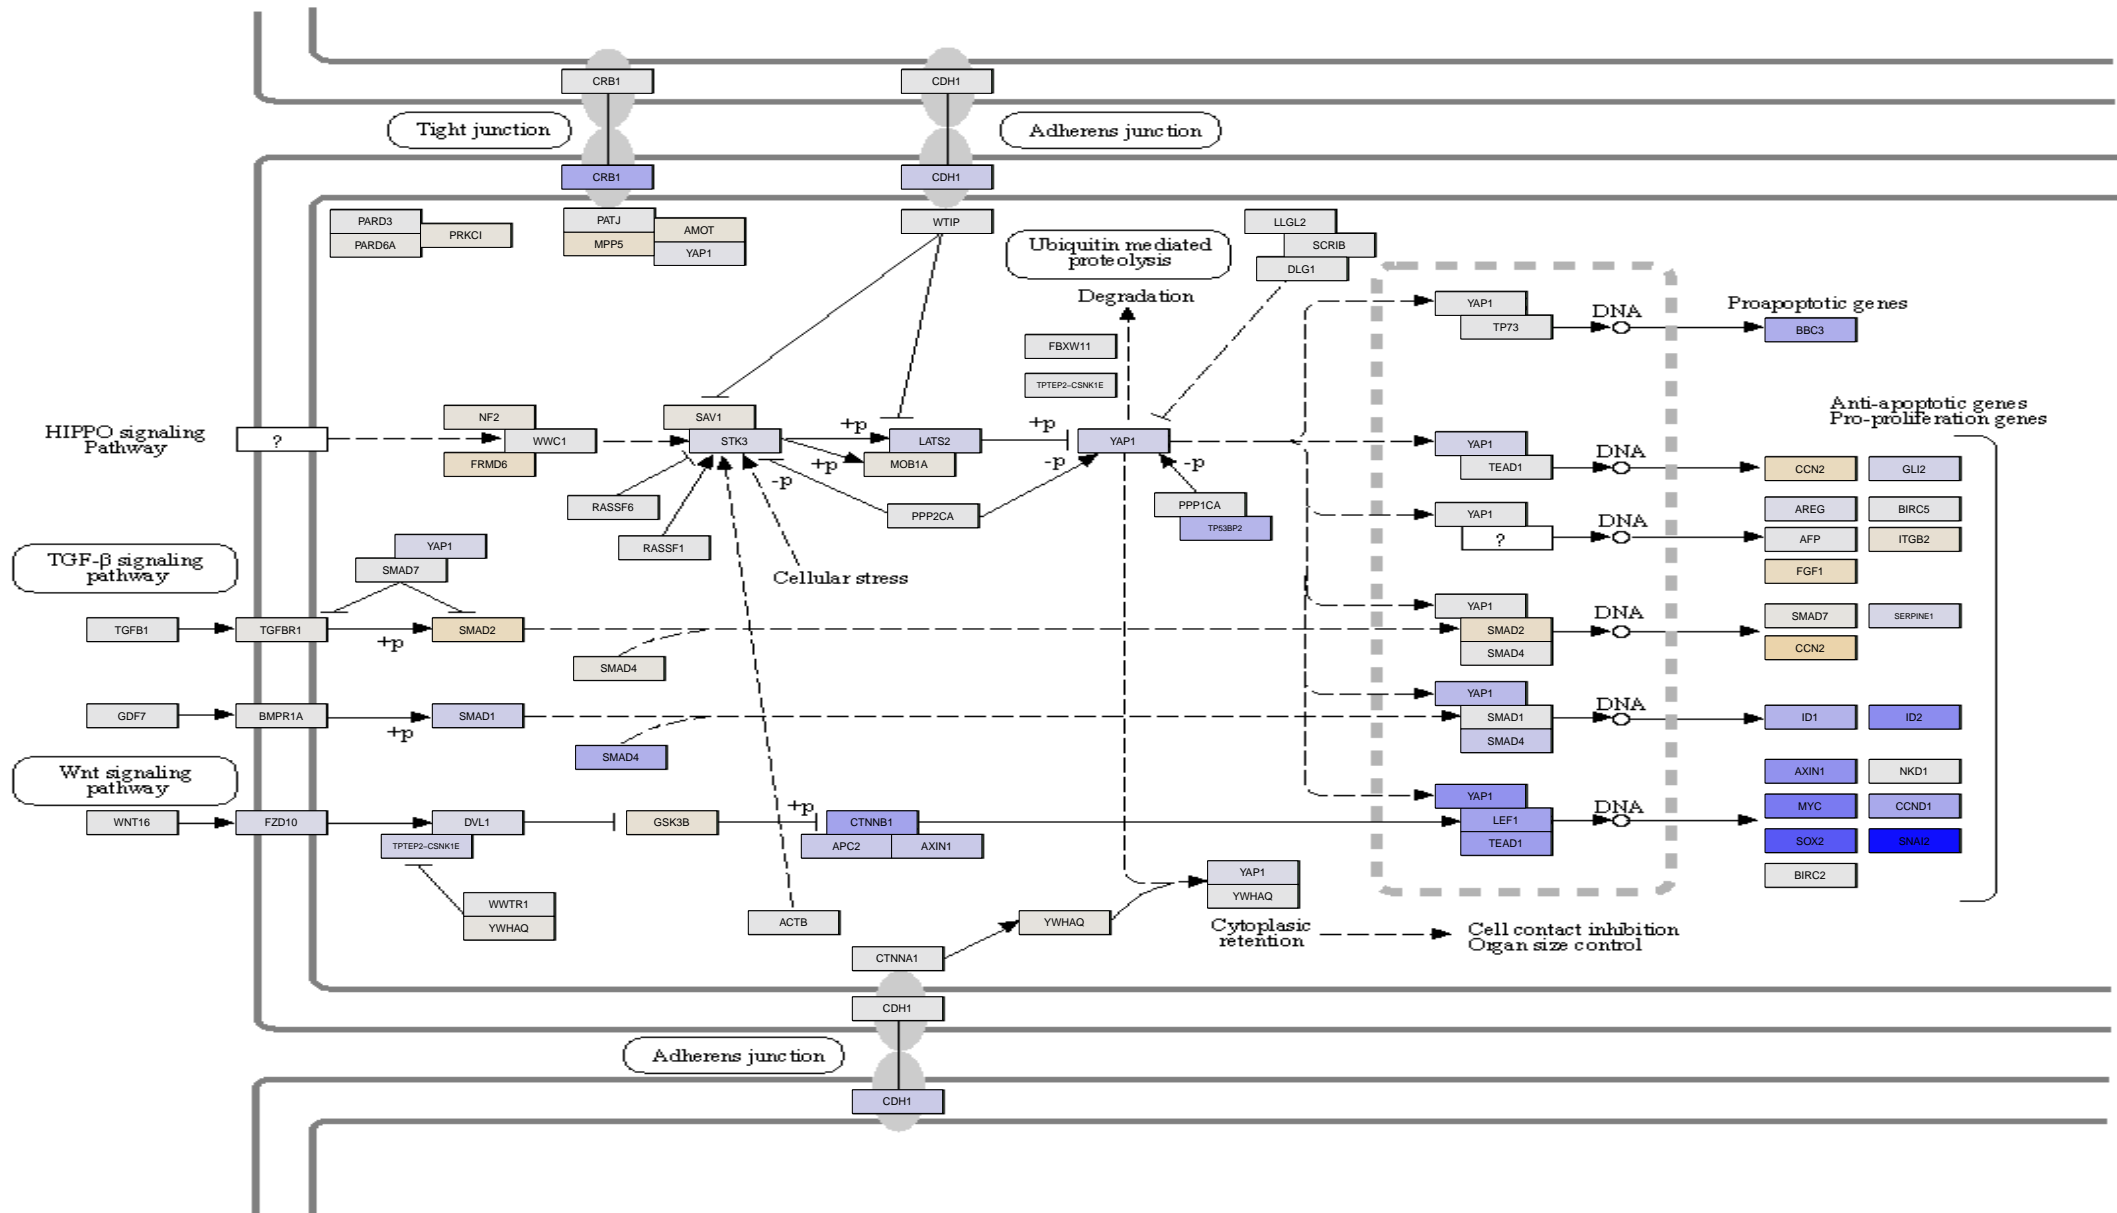

Hippo\_signaling\_pathway  
Adult

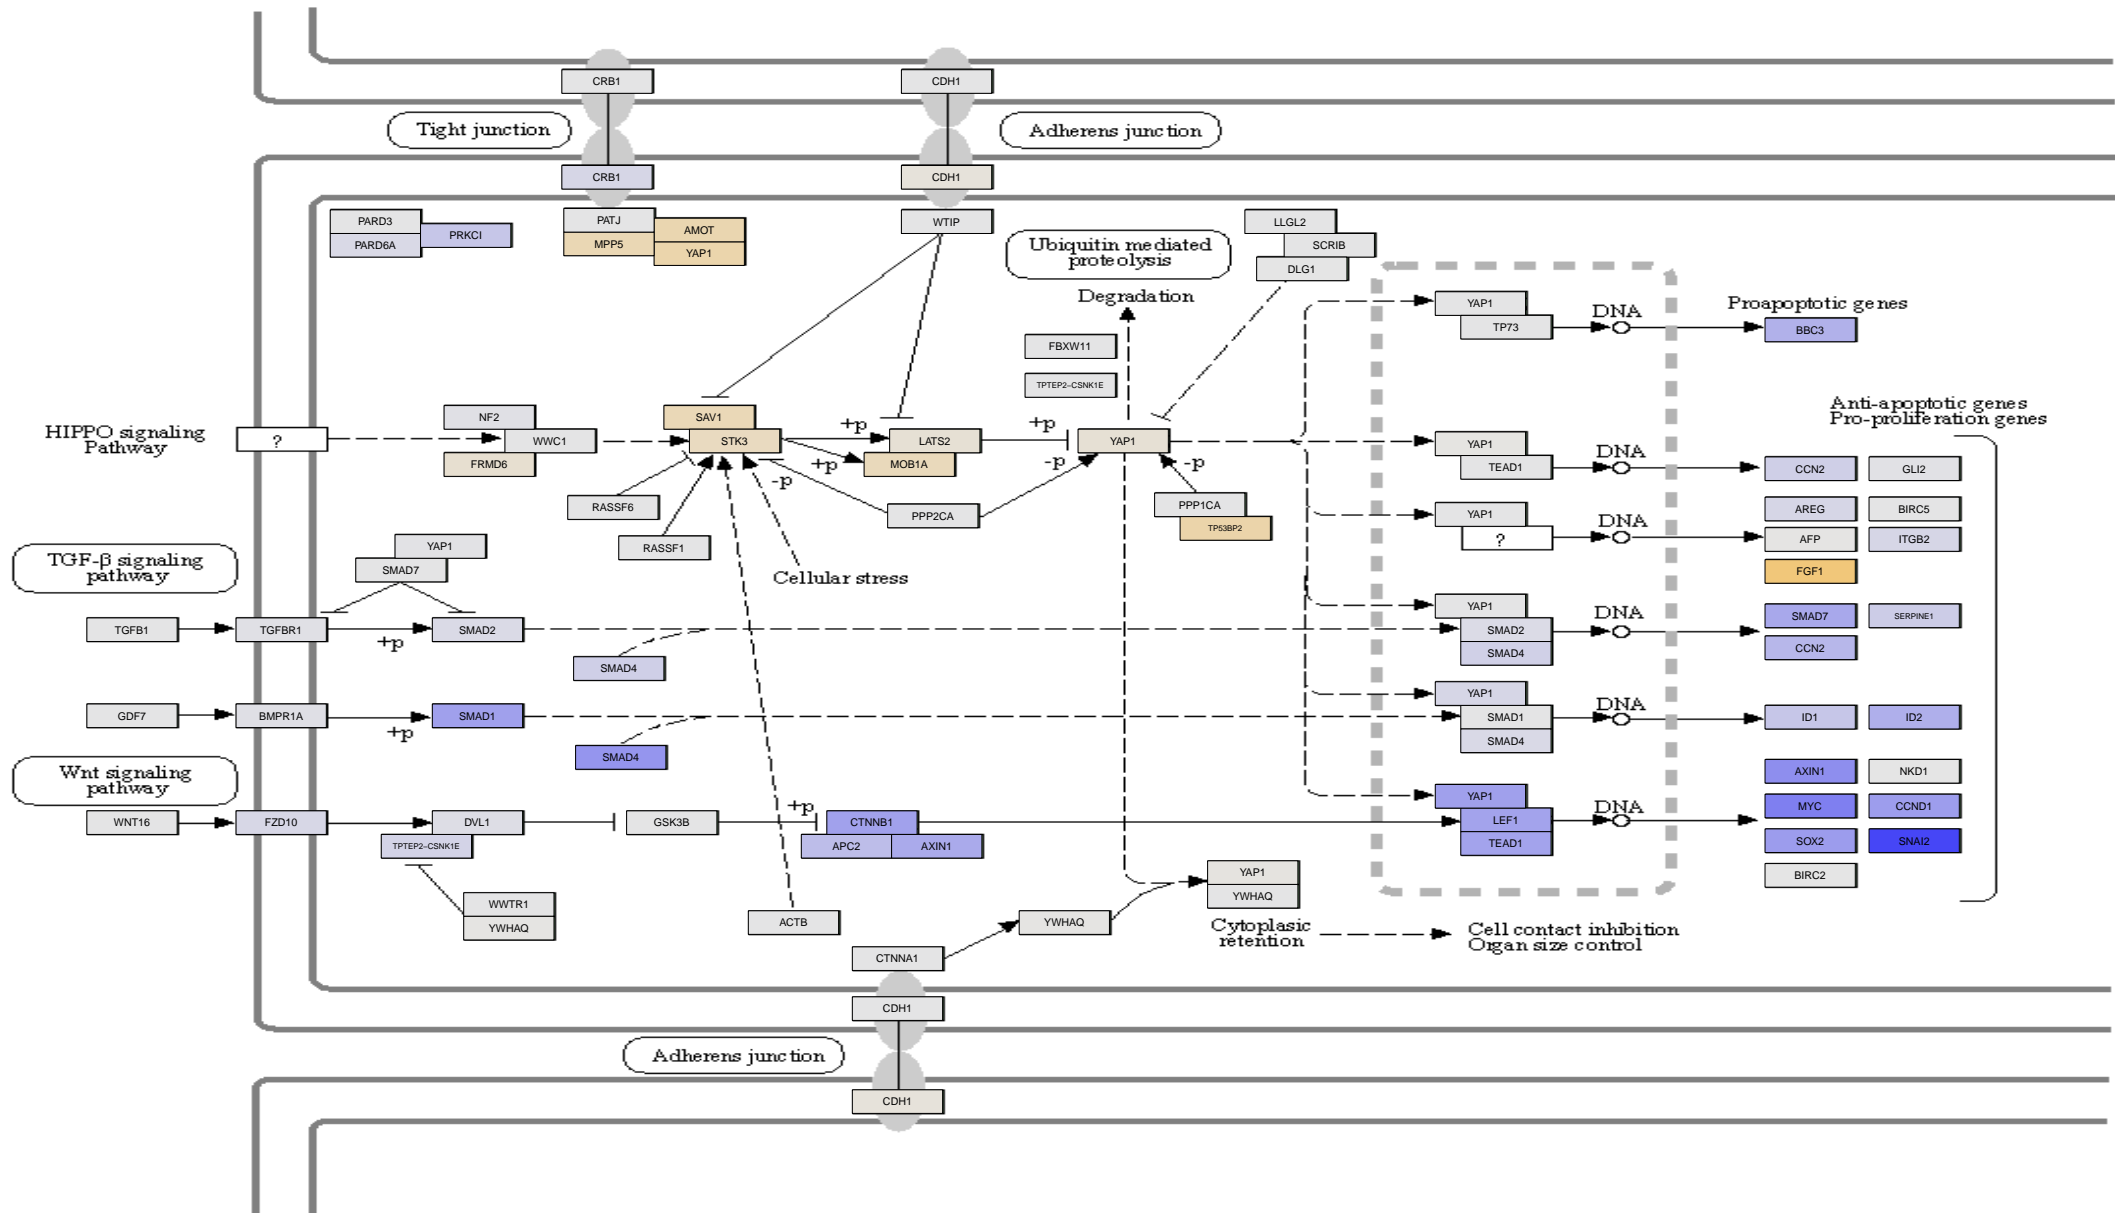



Hippo\_signaling\_pathway  
Late Adult

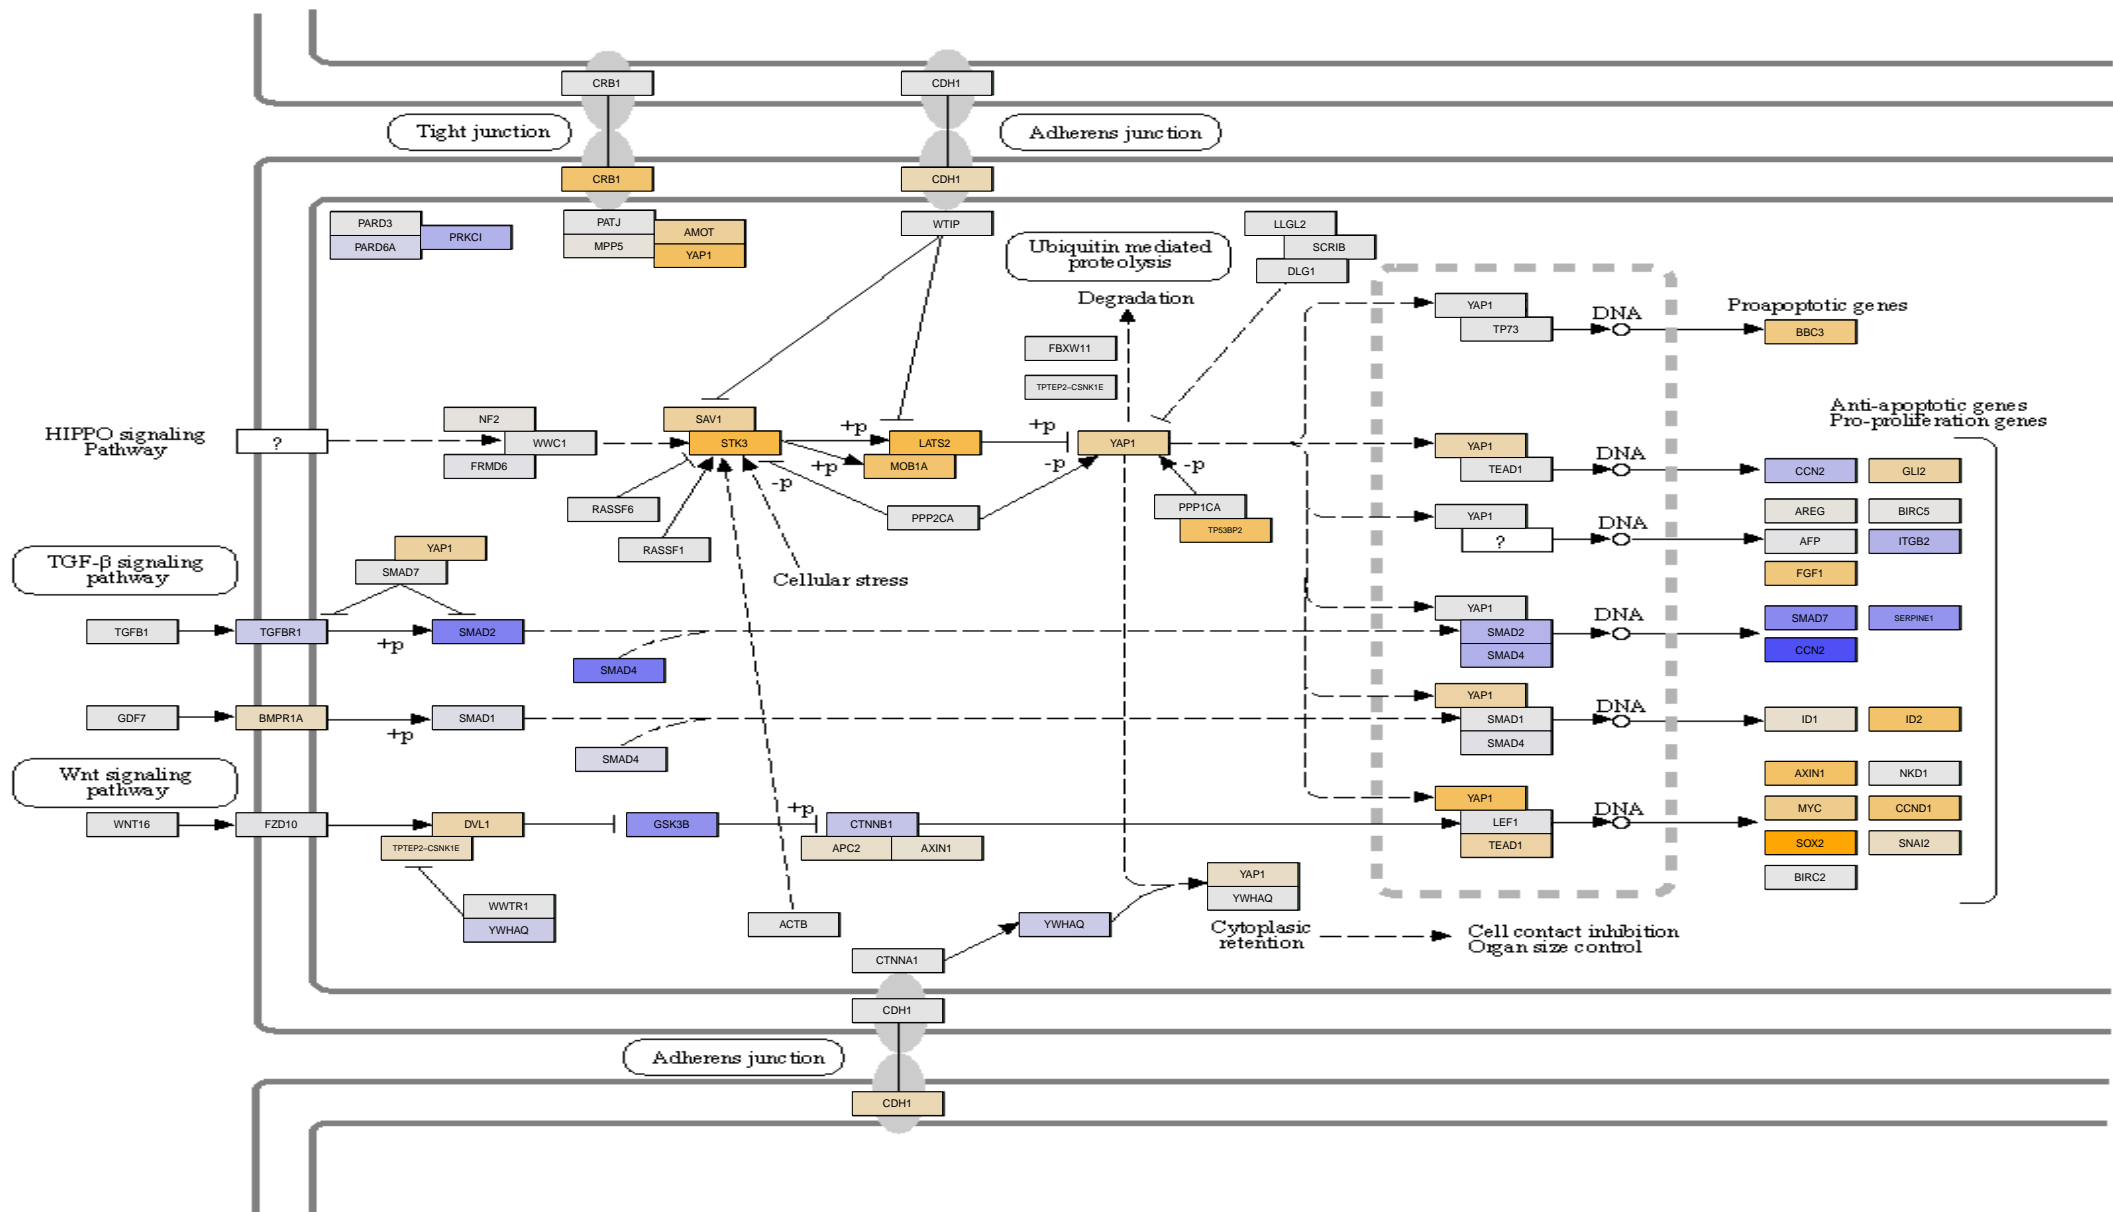

Supplement: s1 [file s1]
