# Supplementary material for: The Transcriptome and Methylome of the Developing and Aging Brain and Their Relations to Gliomas and Psychological Disorders
Source: MDPI journal article supplement (doi:10.3390/cells11030362), 2022-01-21

Fc epsilon RI signaling pathway

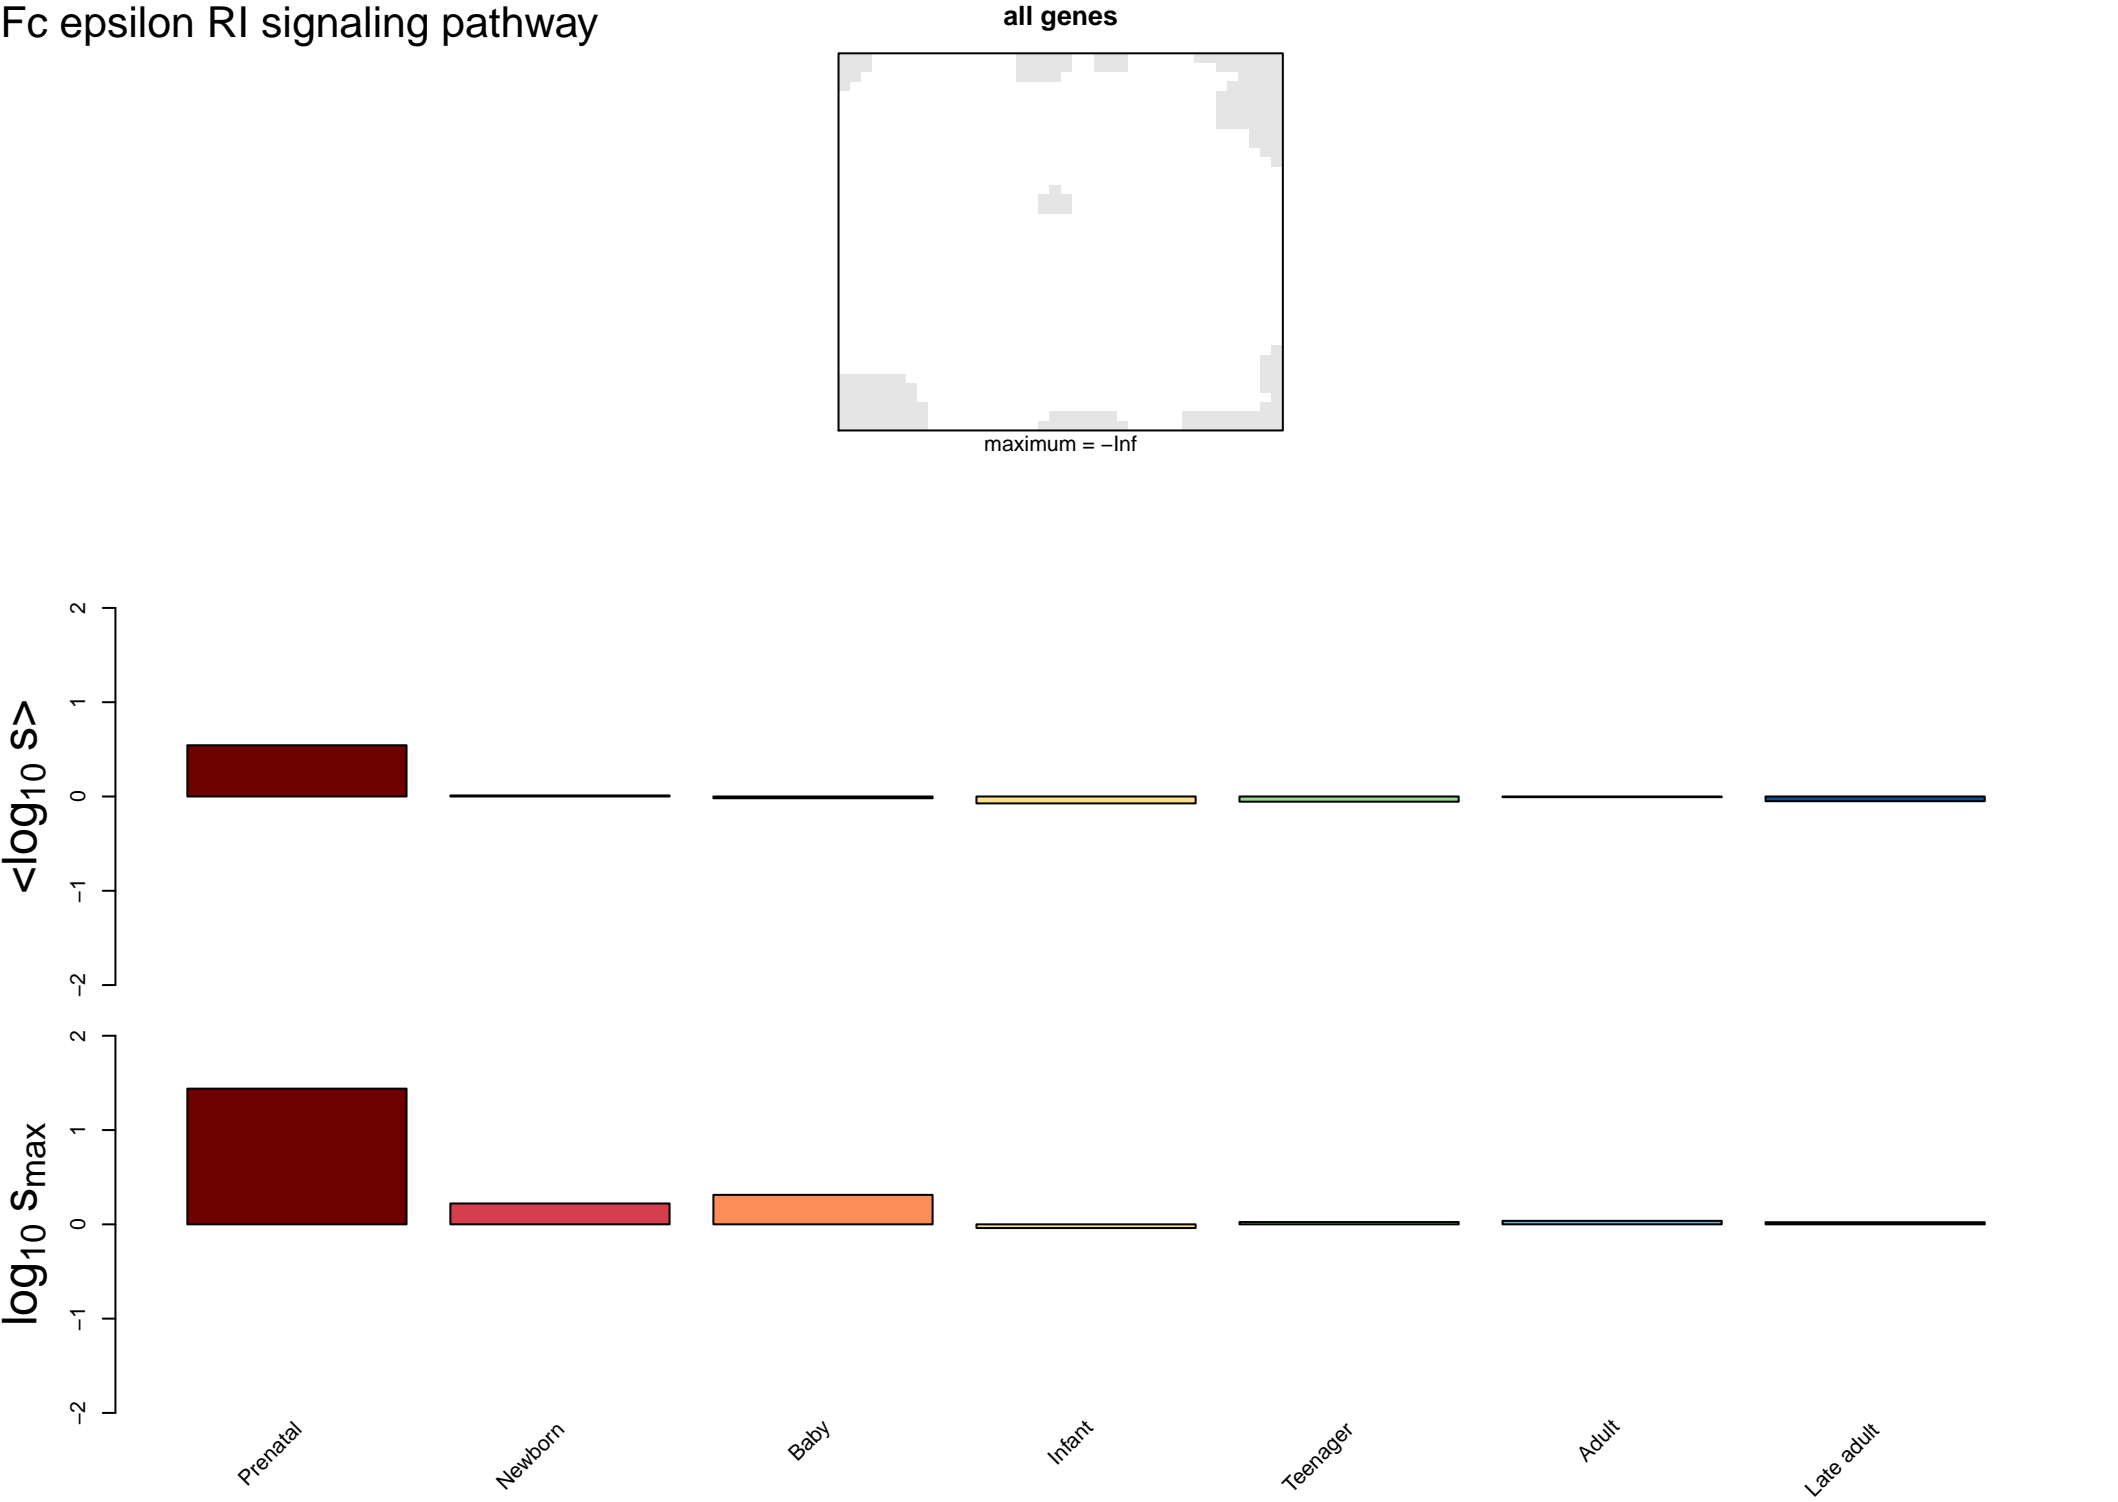

Fc\_epsilon\_R1\_signaling\_pathway  
genes with data

Mast cell

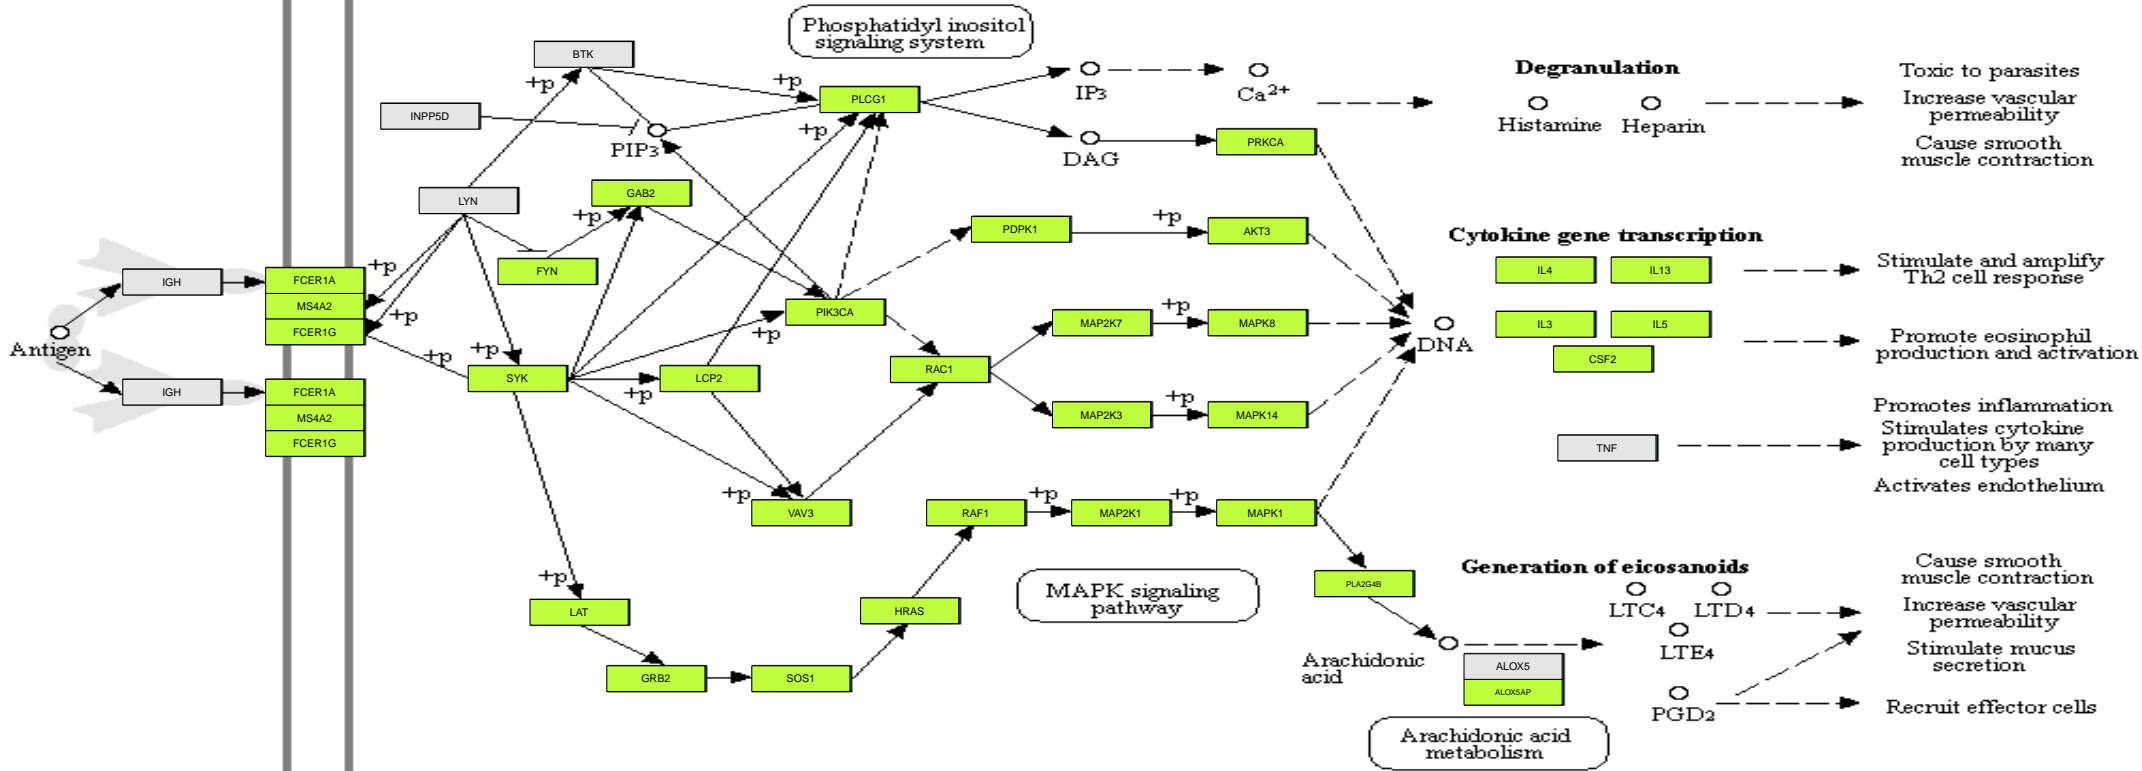

Fc\_epsilon\_R1\_signaling\_pathway  
sink nodes

Mast cell

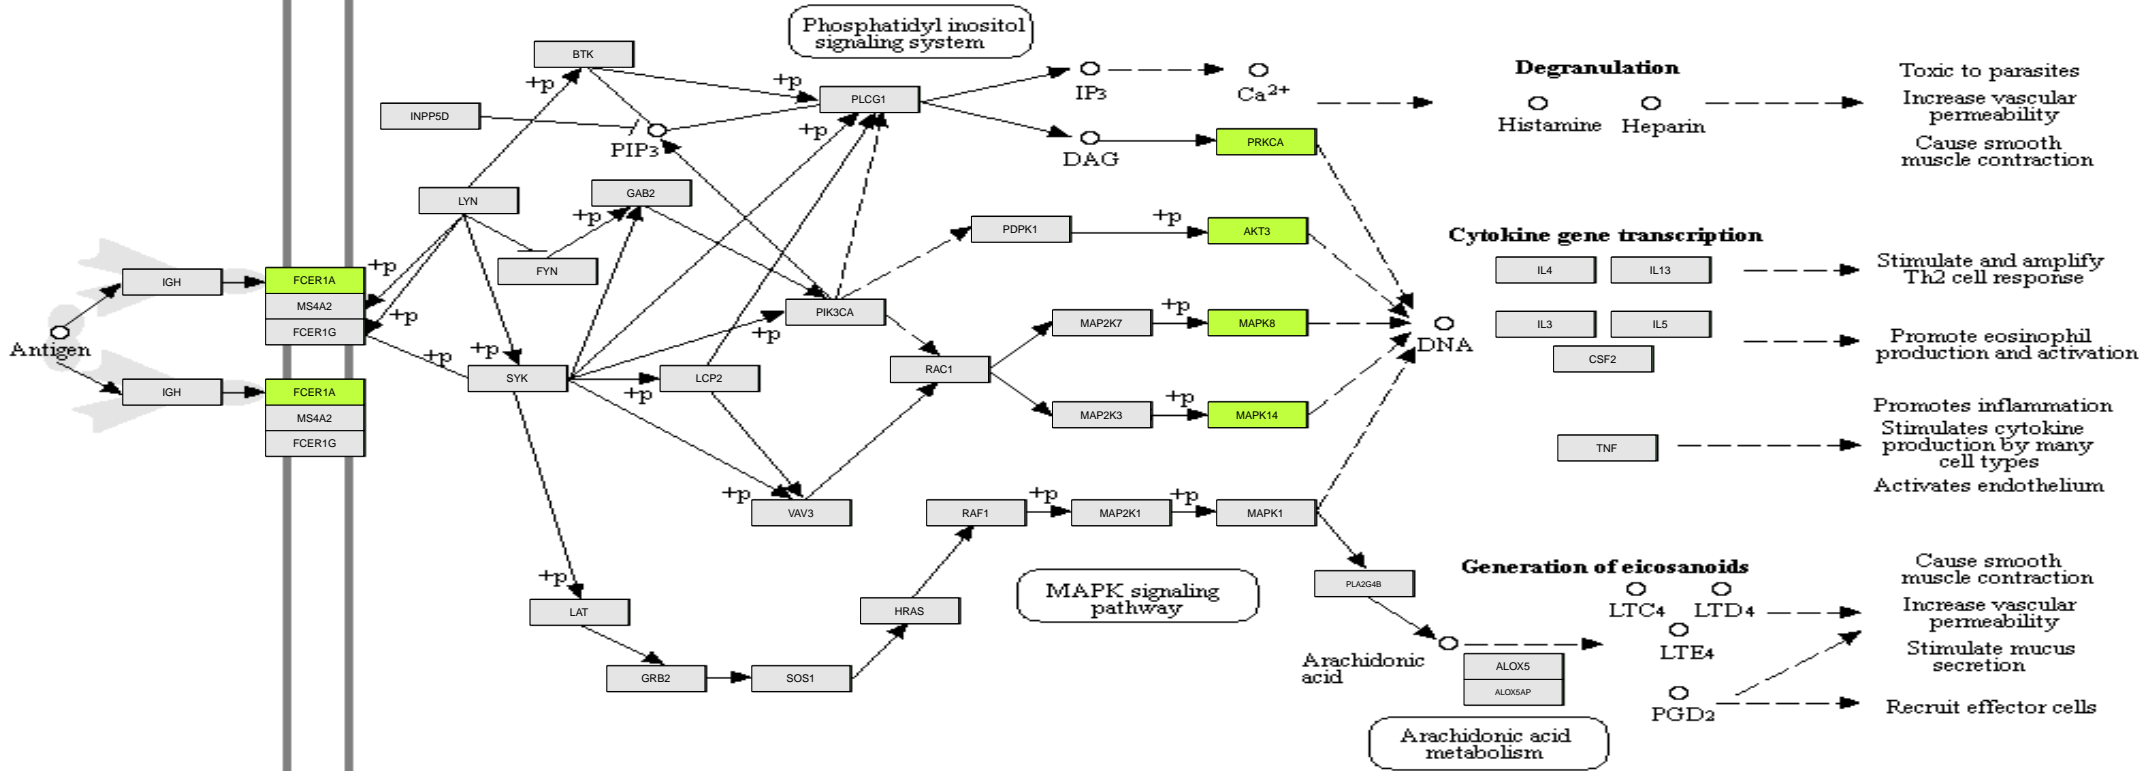

Fc\_epsilon\_R1\_signaling\_pathway  
Prenatal

Mast cell

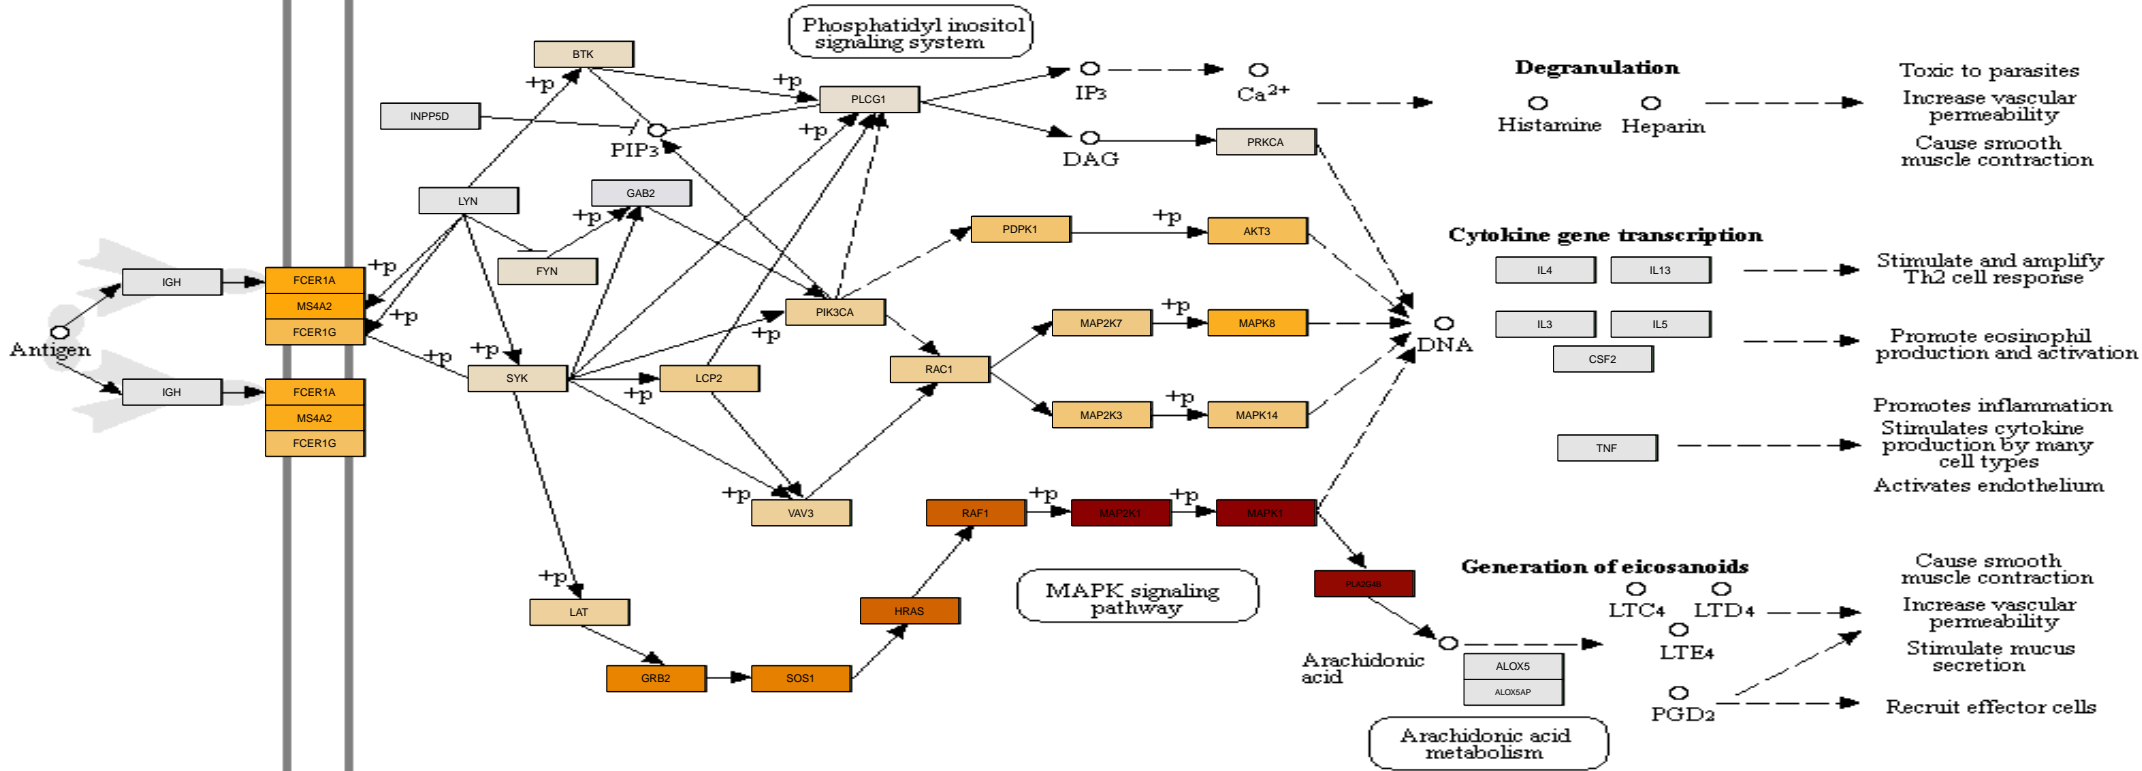

Fc\_epsilon\_R1\_signaling\_pathway  
Newborn

Mast cell

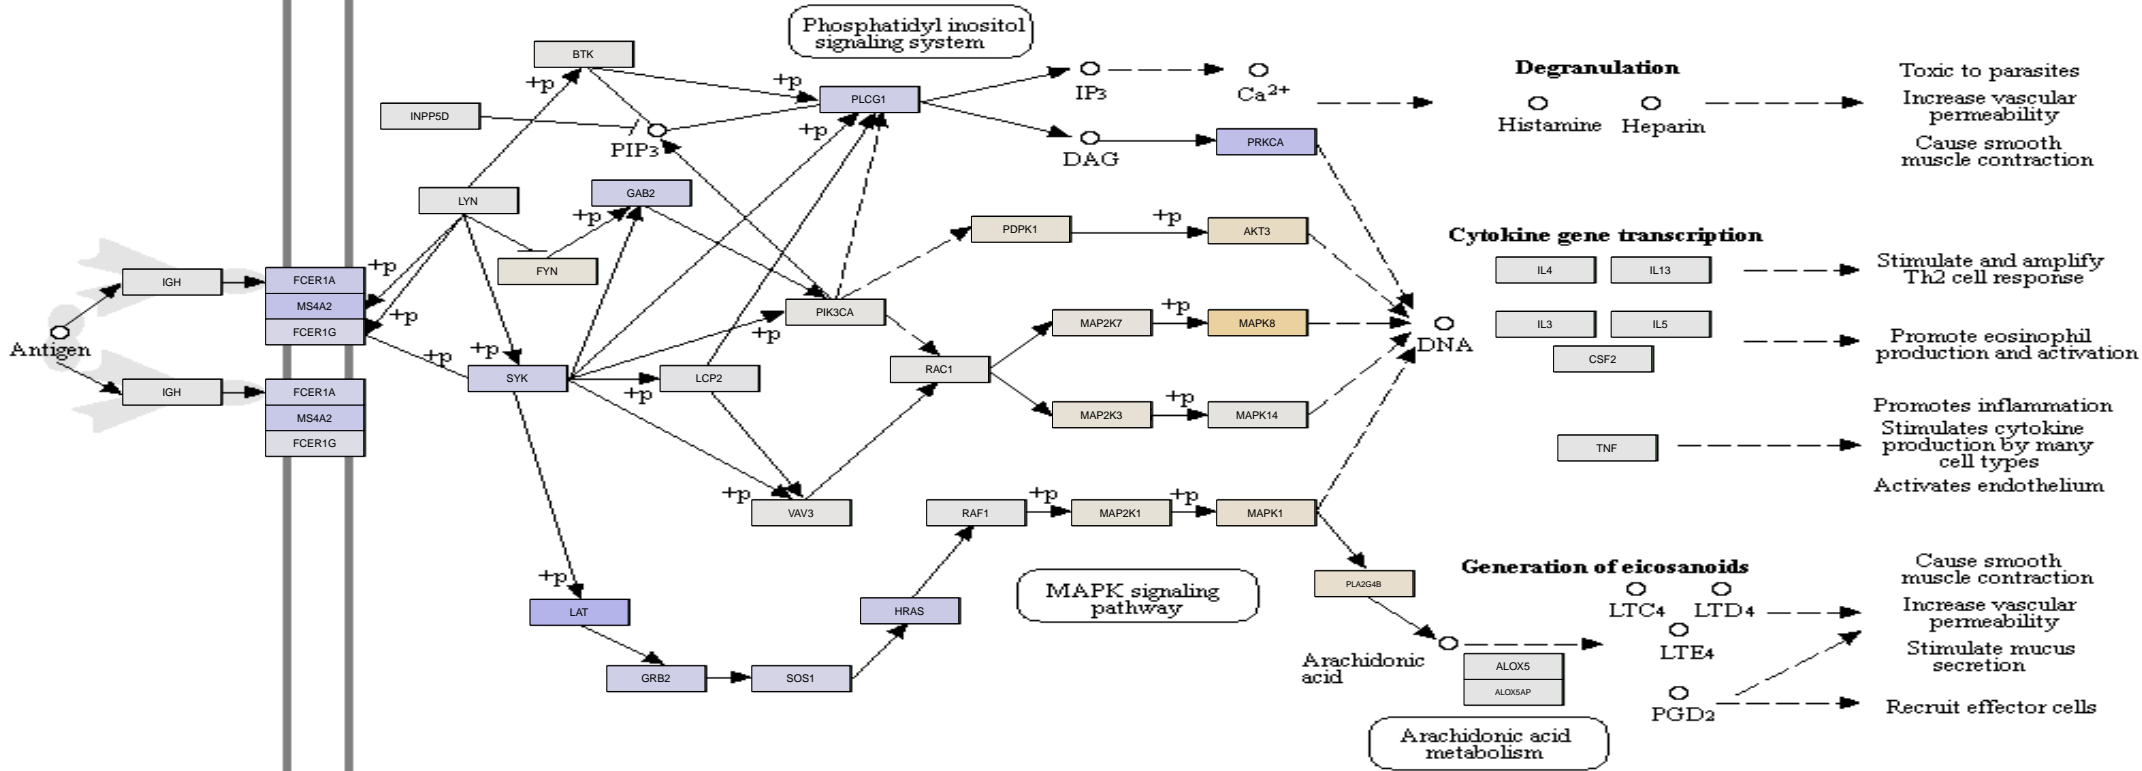

Fc\_epsilon\_R1\_signaling\_pathway  
Baby

Mast cell

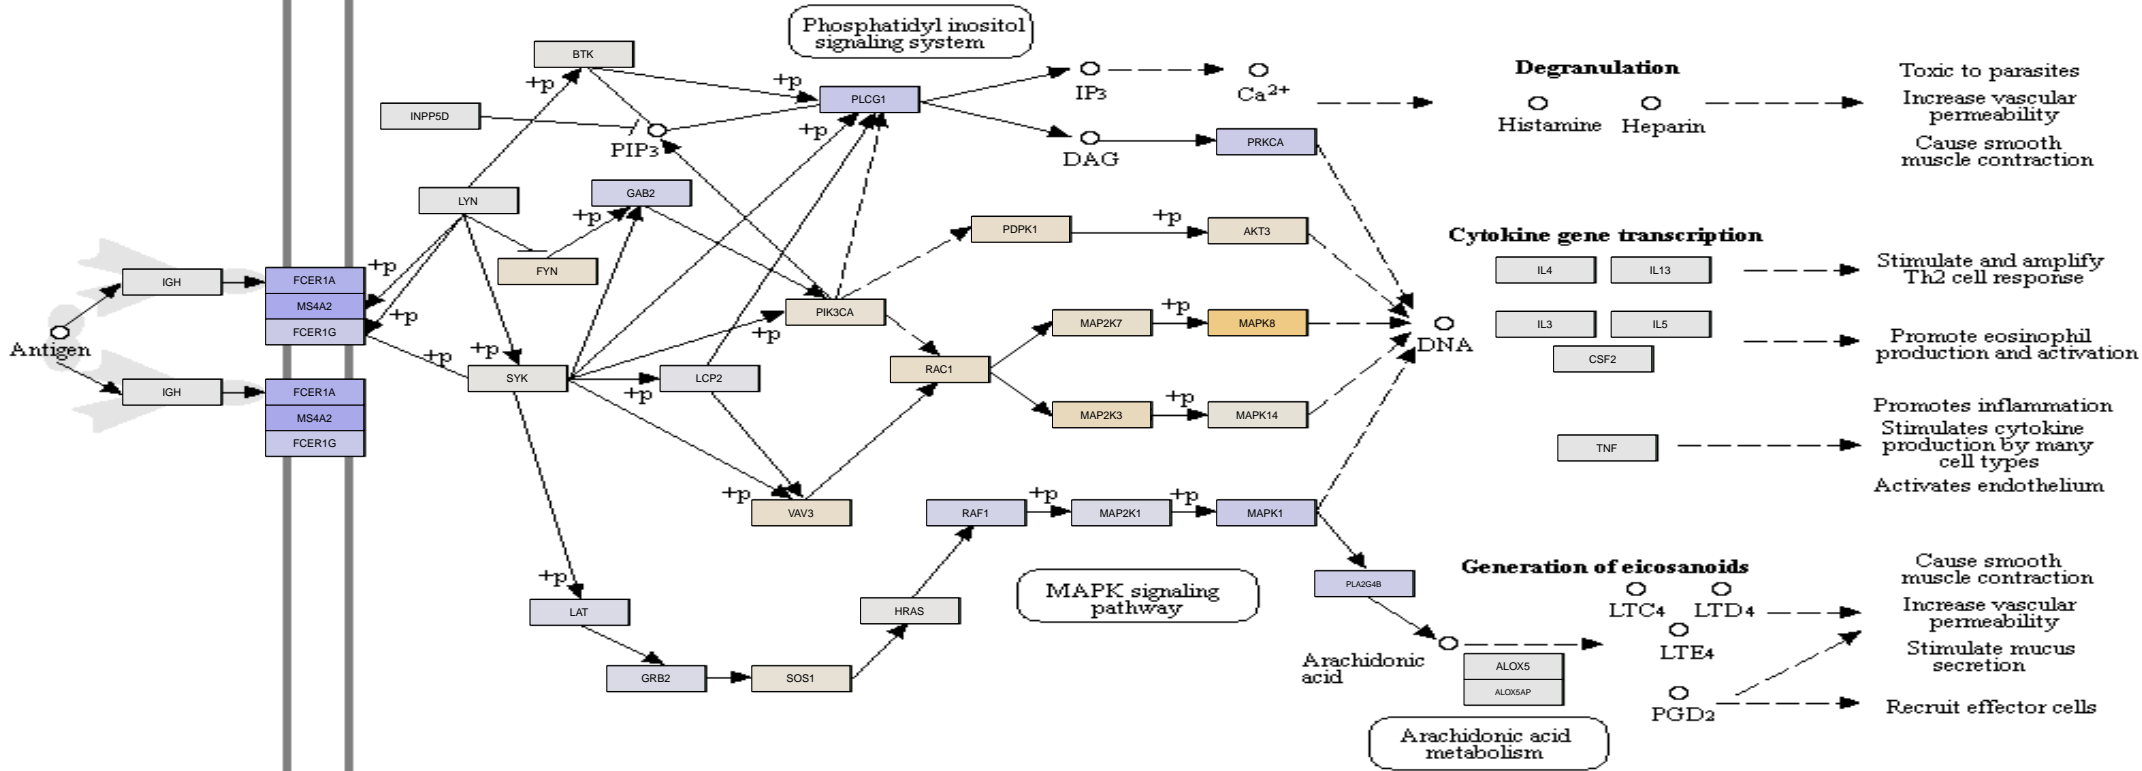

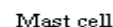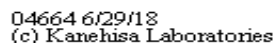

Fc\_epsilon\_R1\_signaling\_pathway  
Teenager

Mast cell

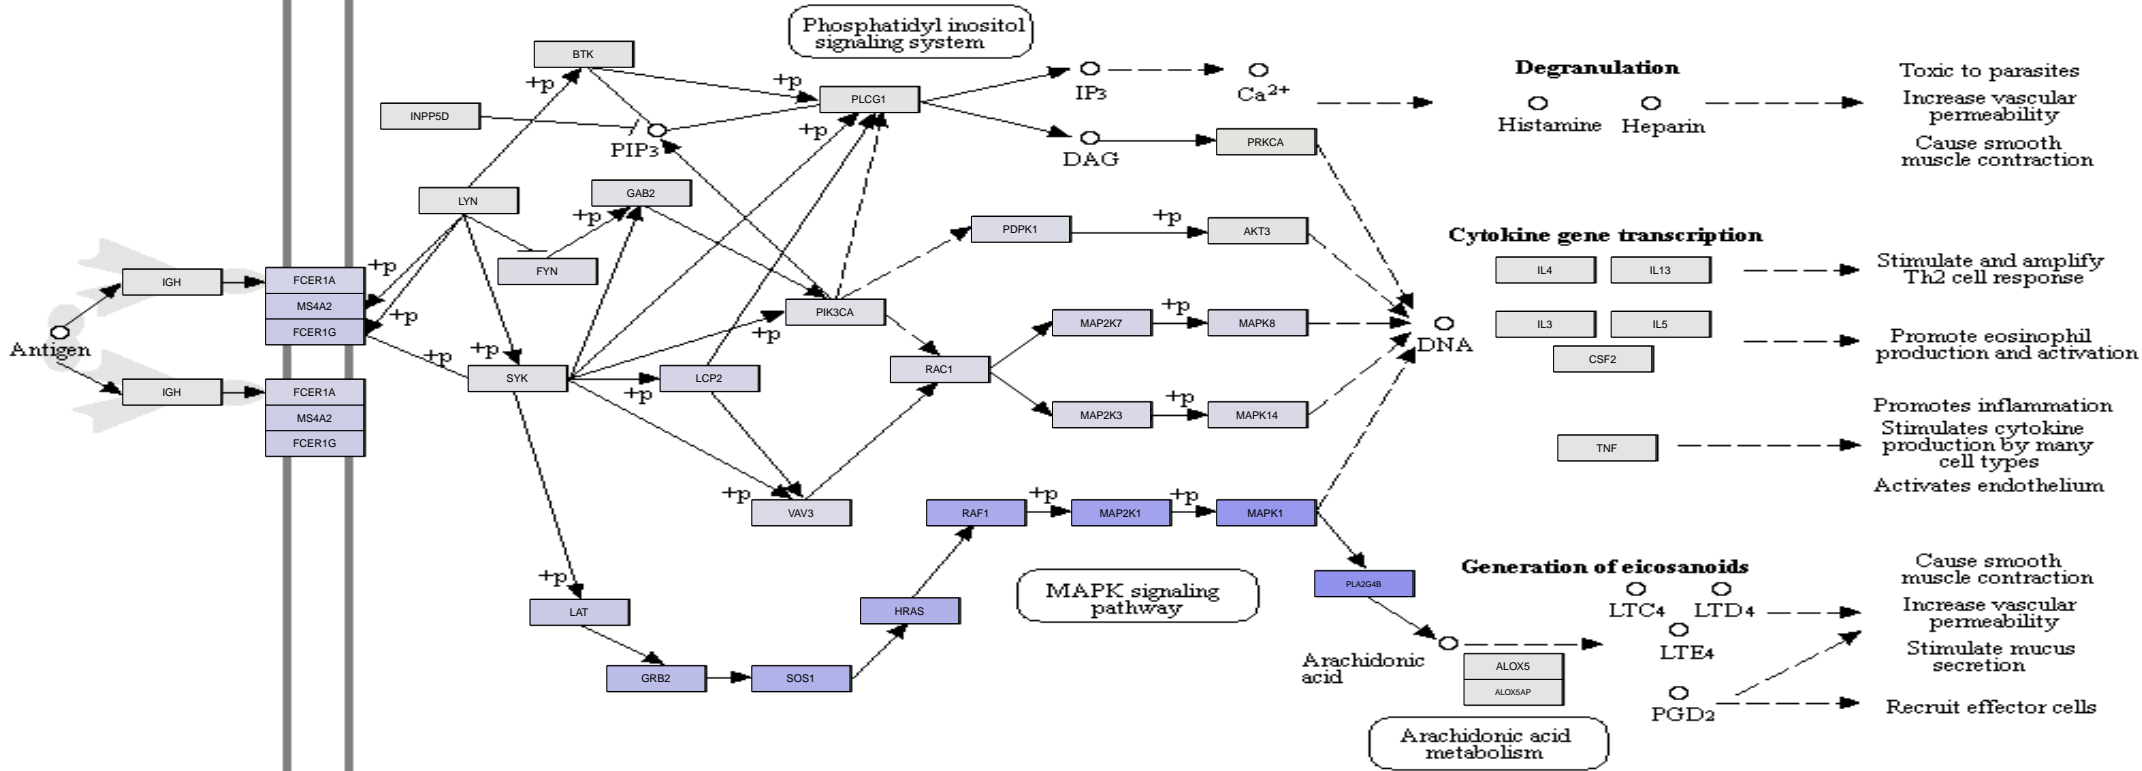



Fc\_epsilon\_R1\_signaling\_pathway  
Adult

Mast cell

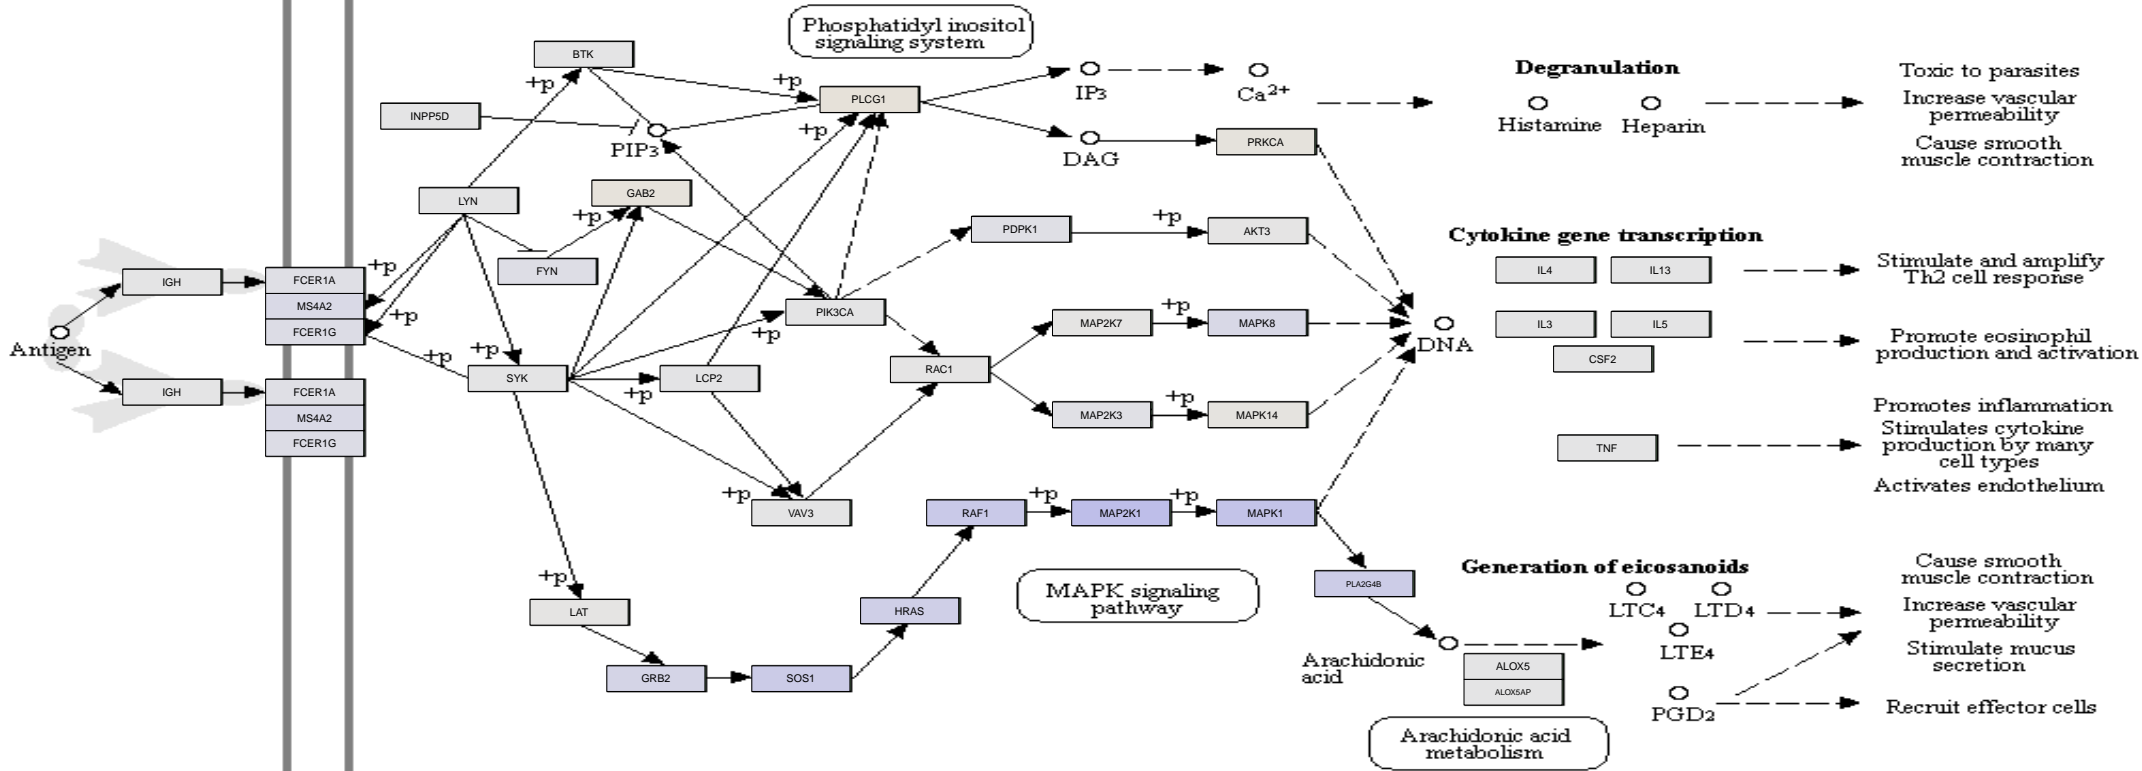

Fc\_epsilon\_R1\_signaling\_pathway  
Late adult

Mast cell

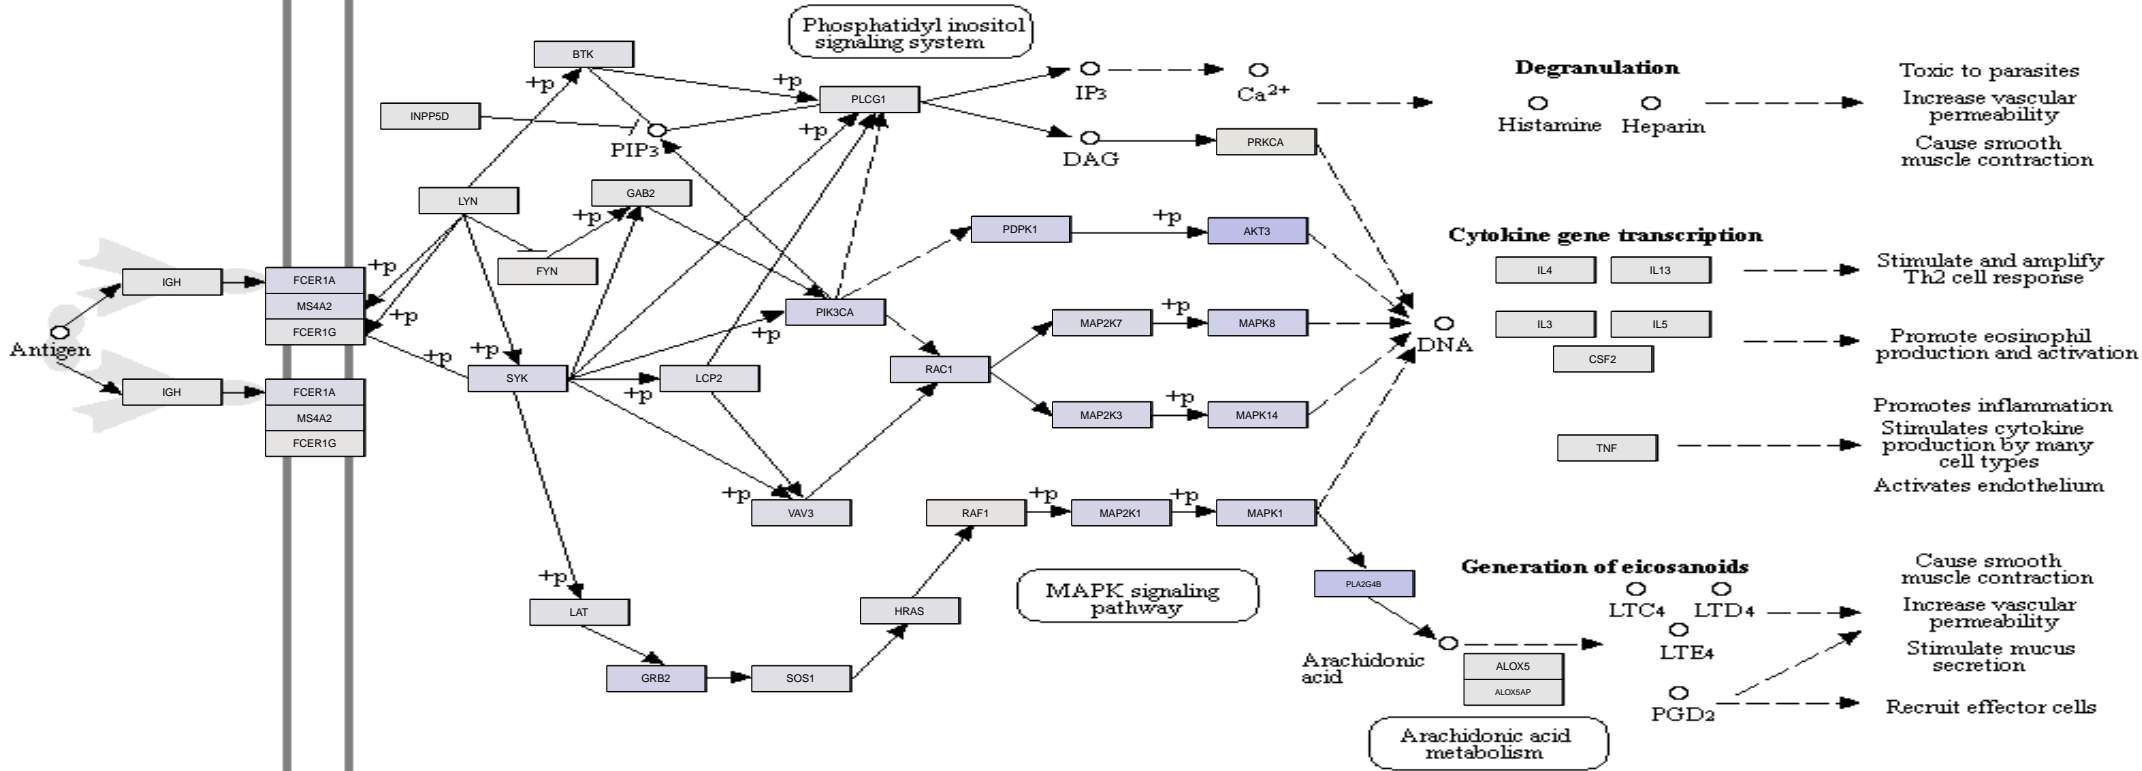

Supplement: s1 [file s1]
