# Supplementary material for: The Transcriptome and Methylome of the Developing and Aging Brain and Their Relations to Gliomas and Psychological Disorders
Source: MDPI journal article supplement (doi:10.3390/cells11030362), 2022-01-21

Hedgehog signaling pathway

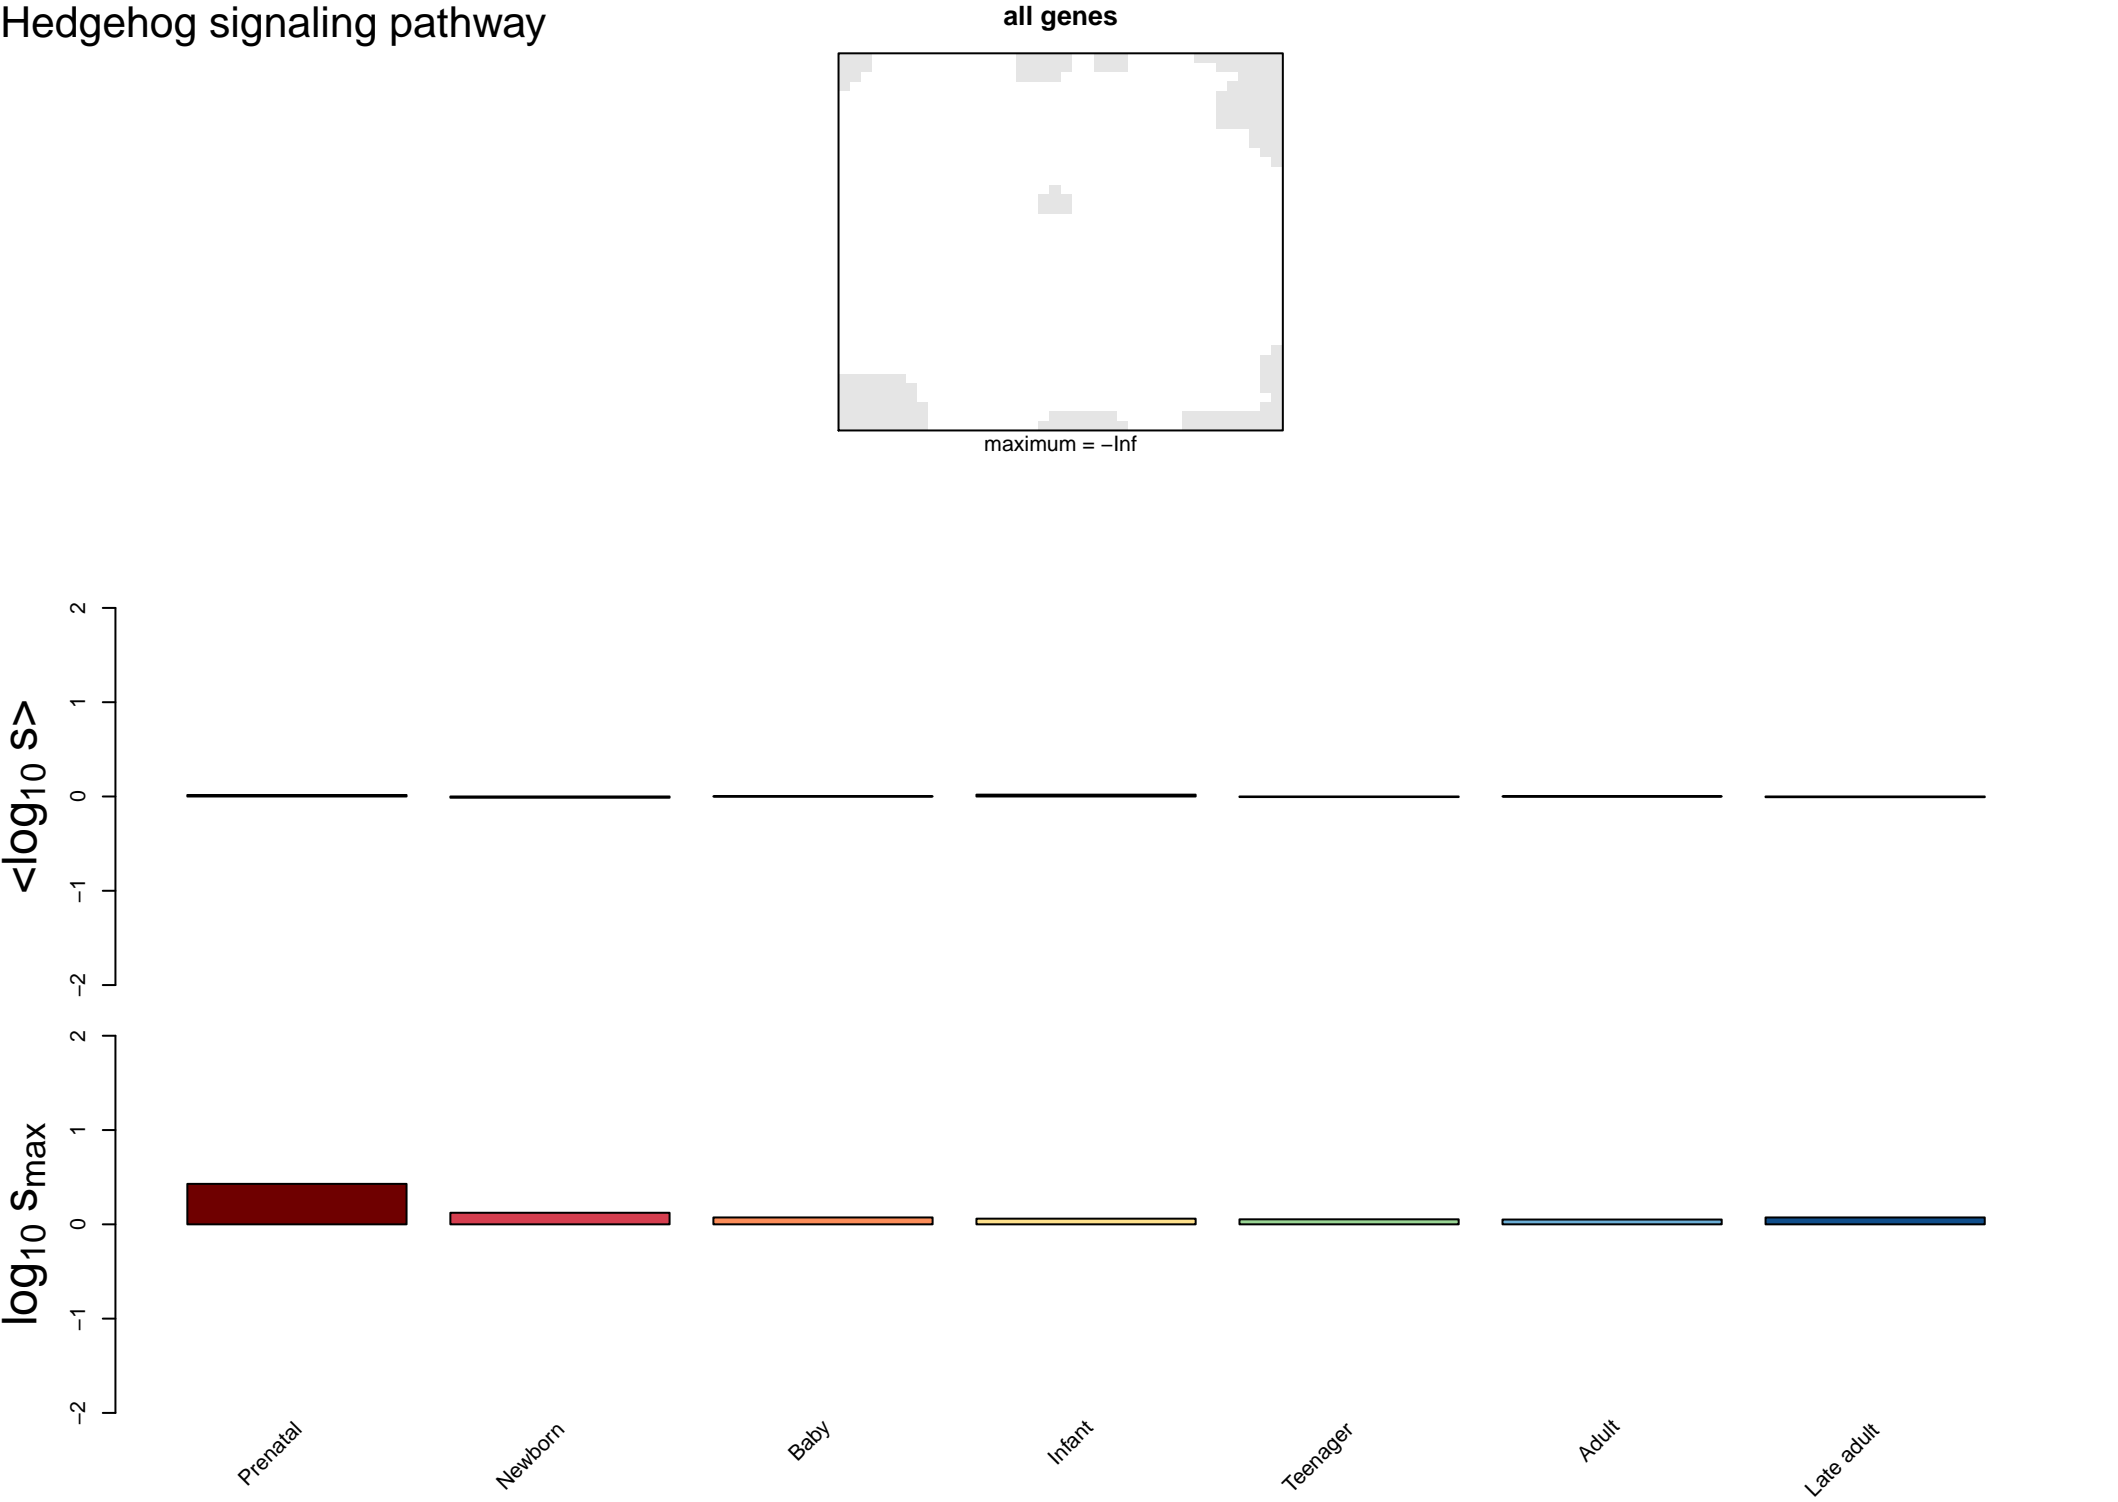

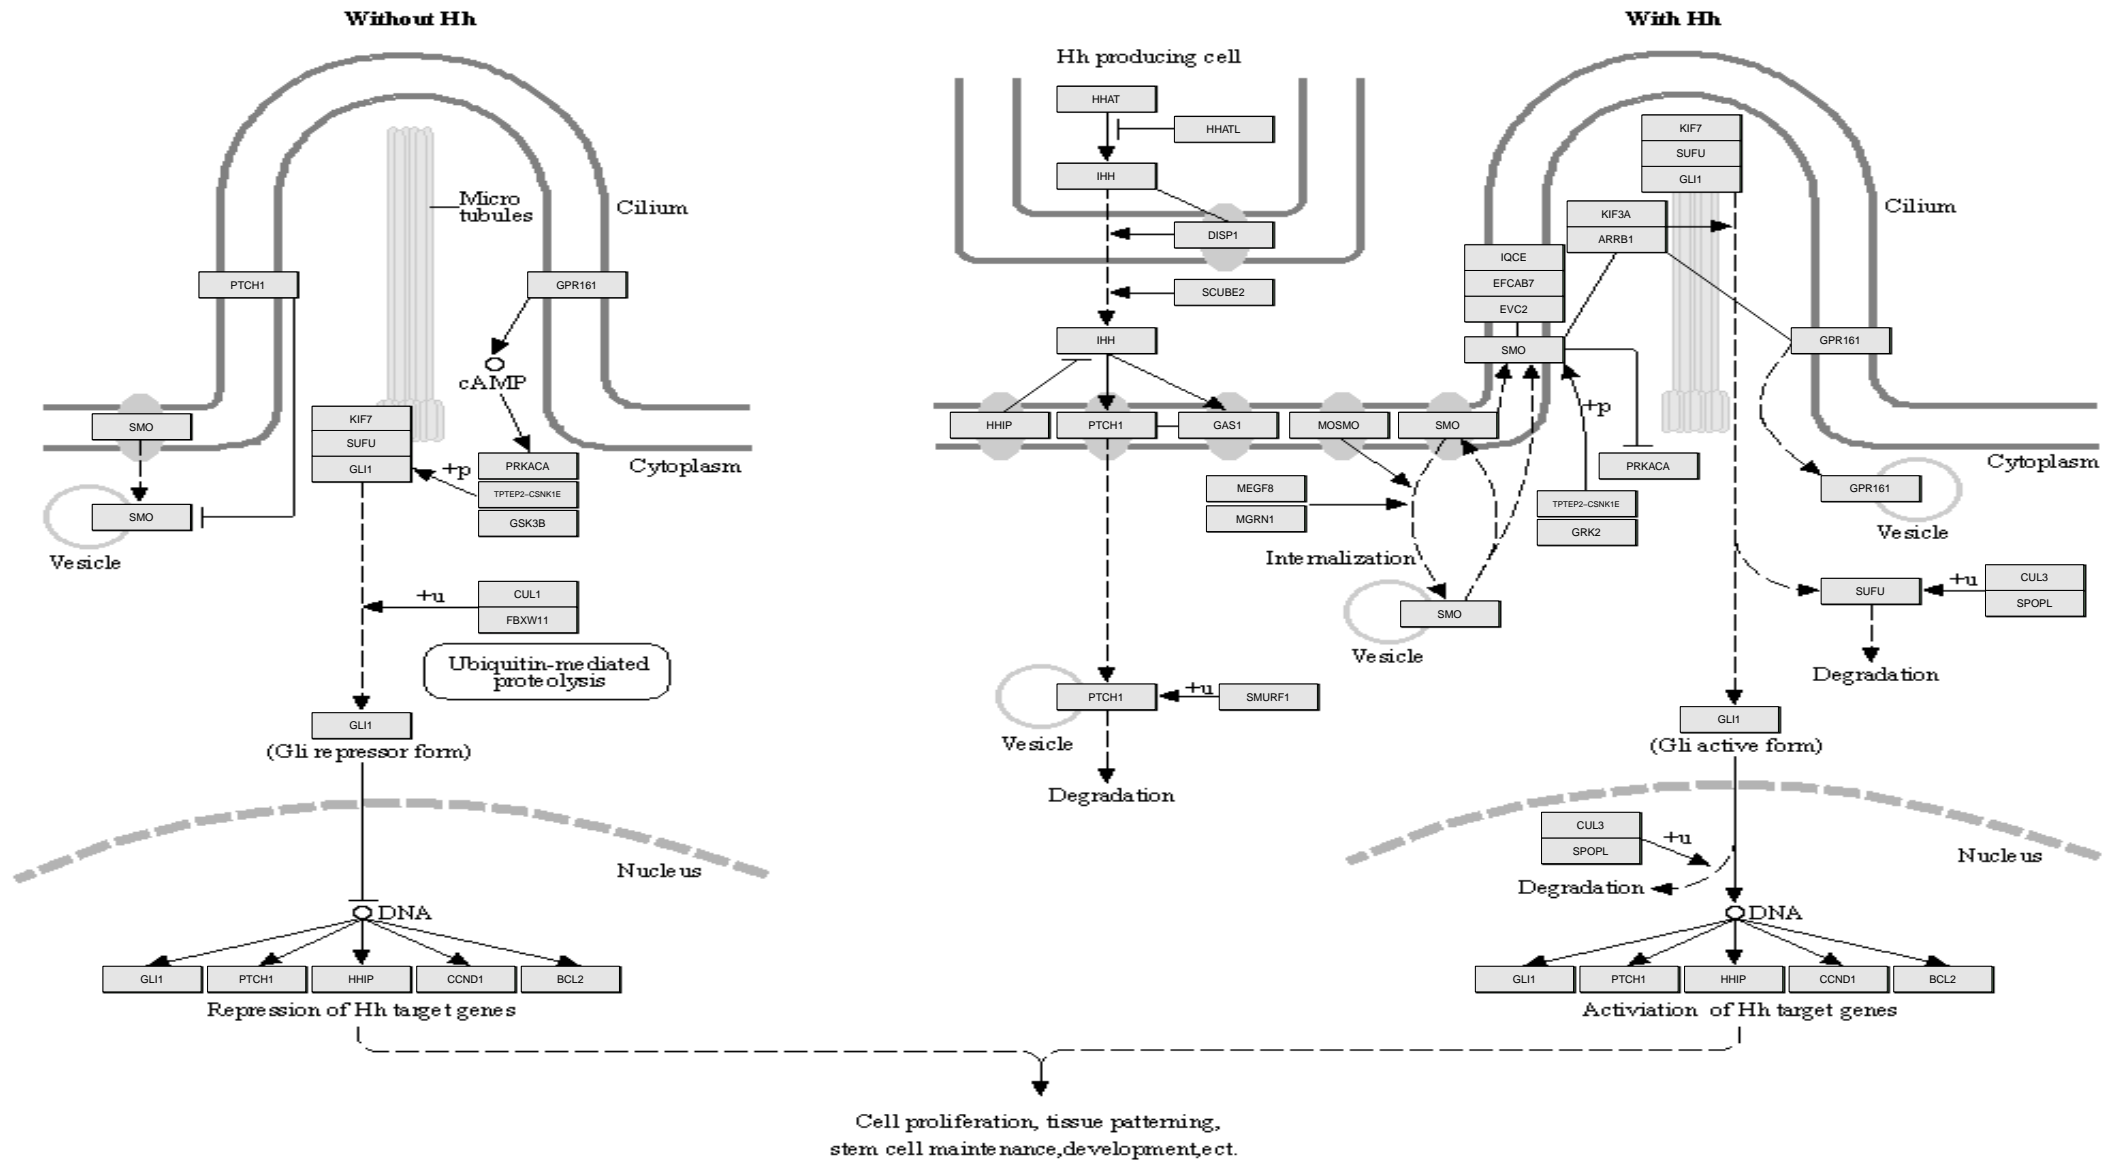





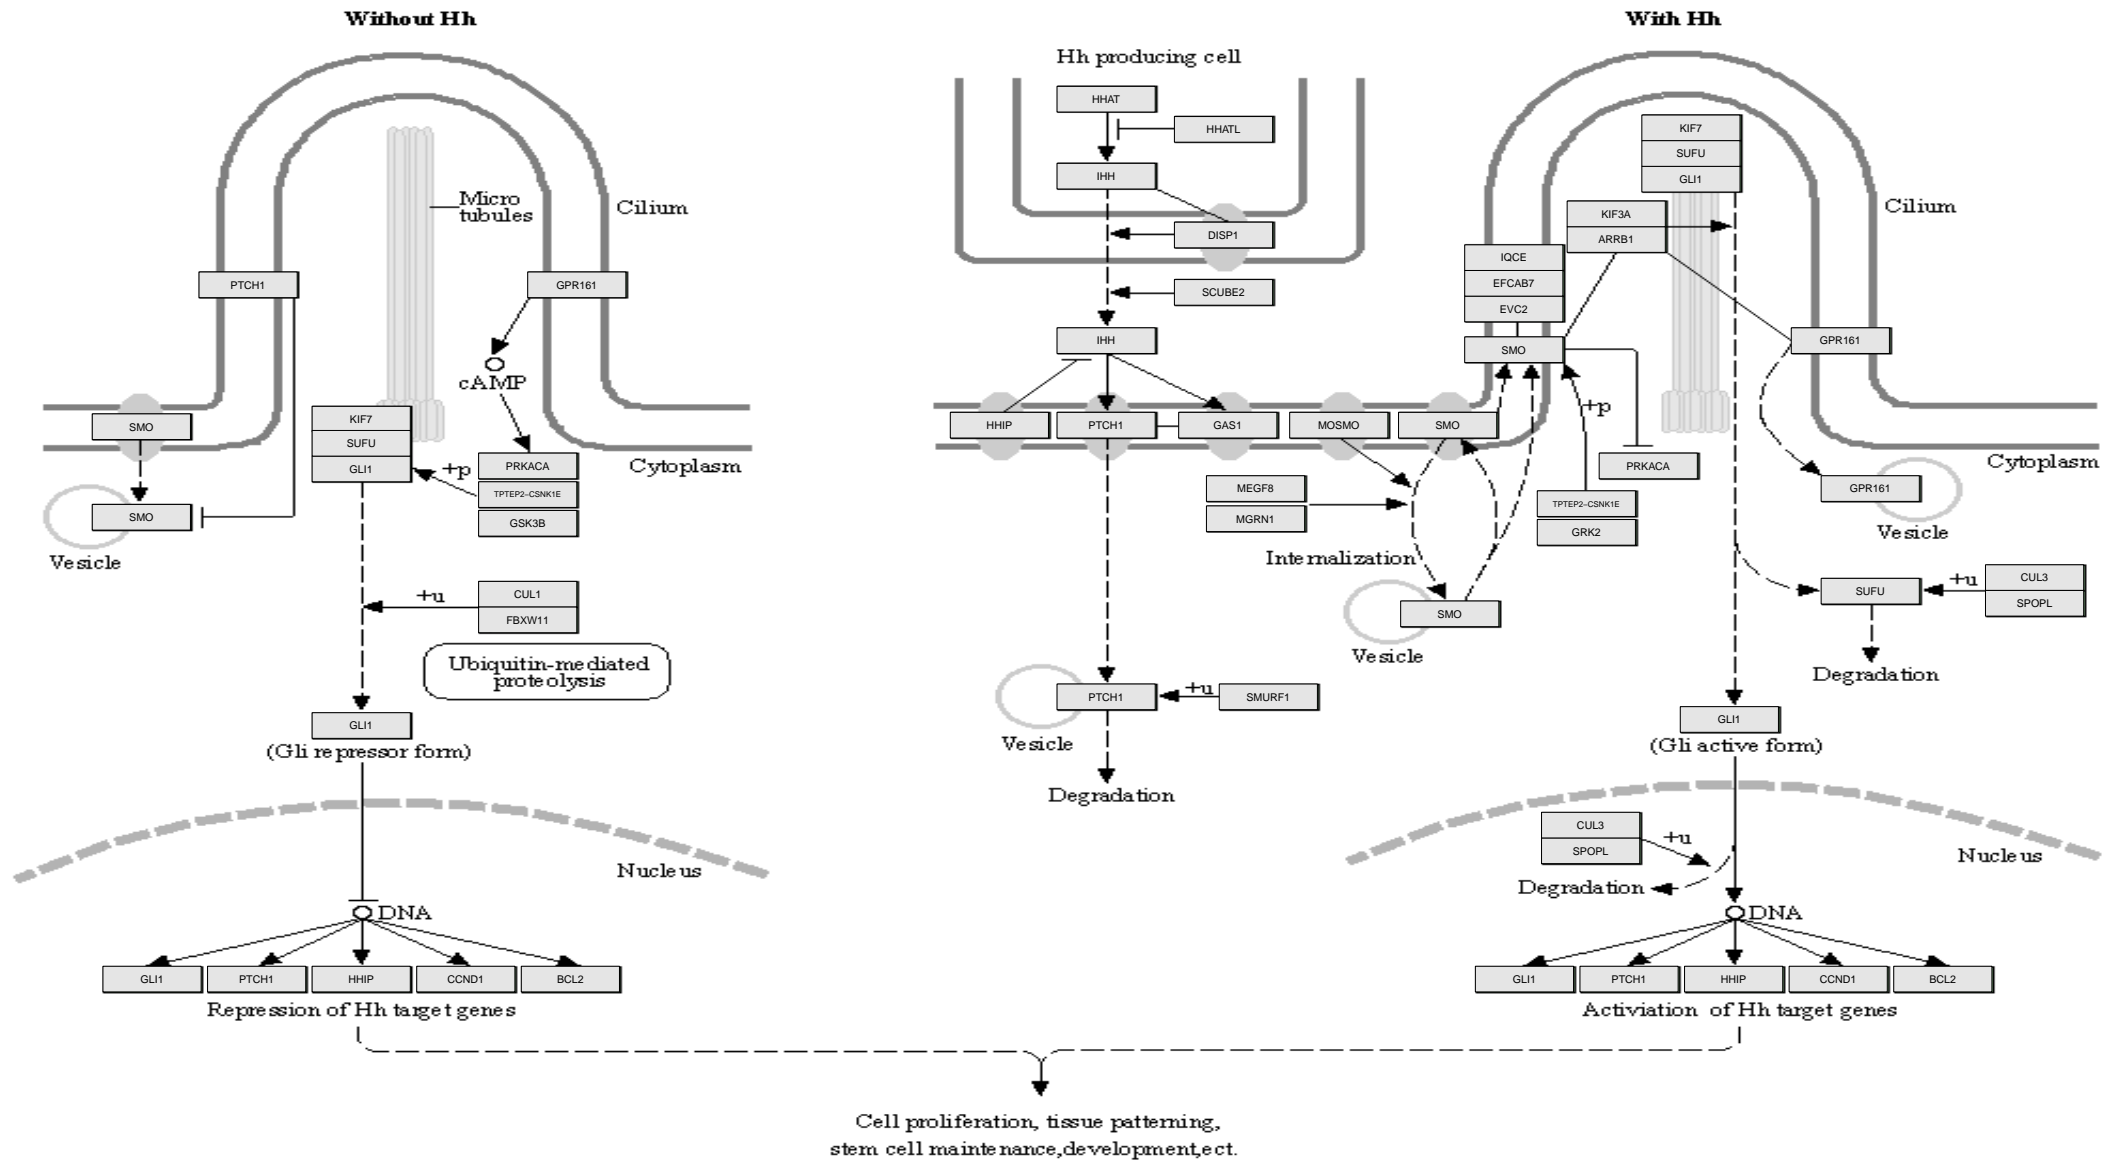

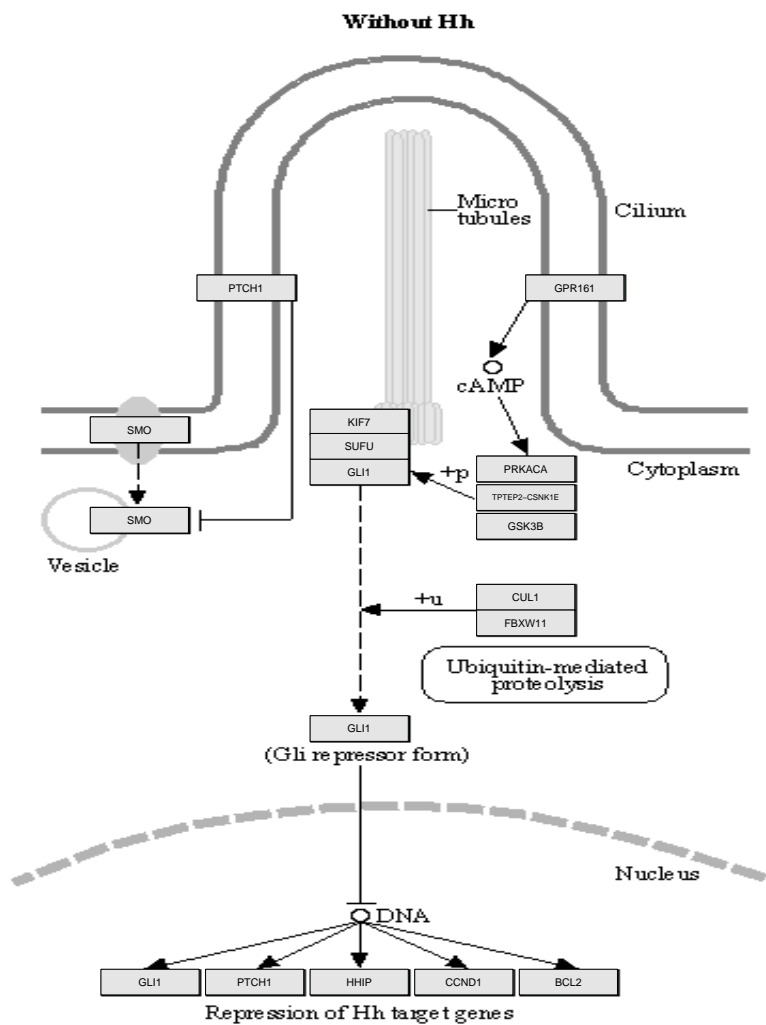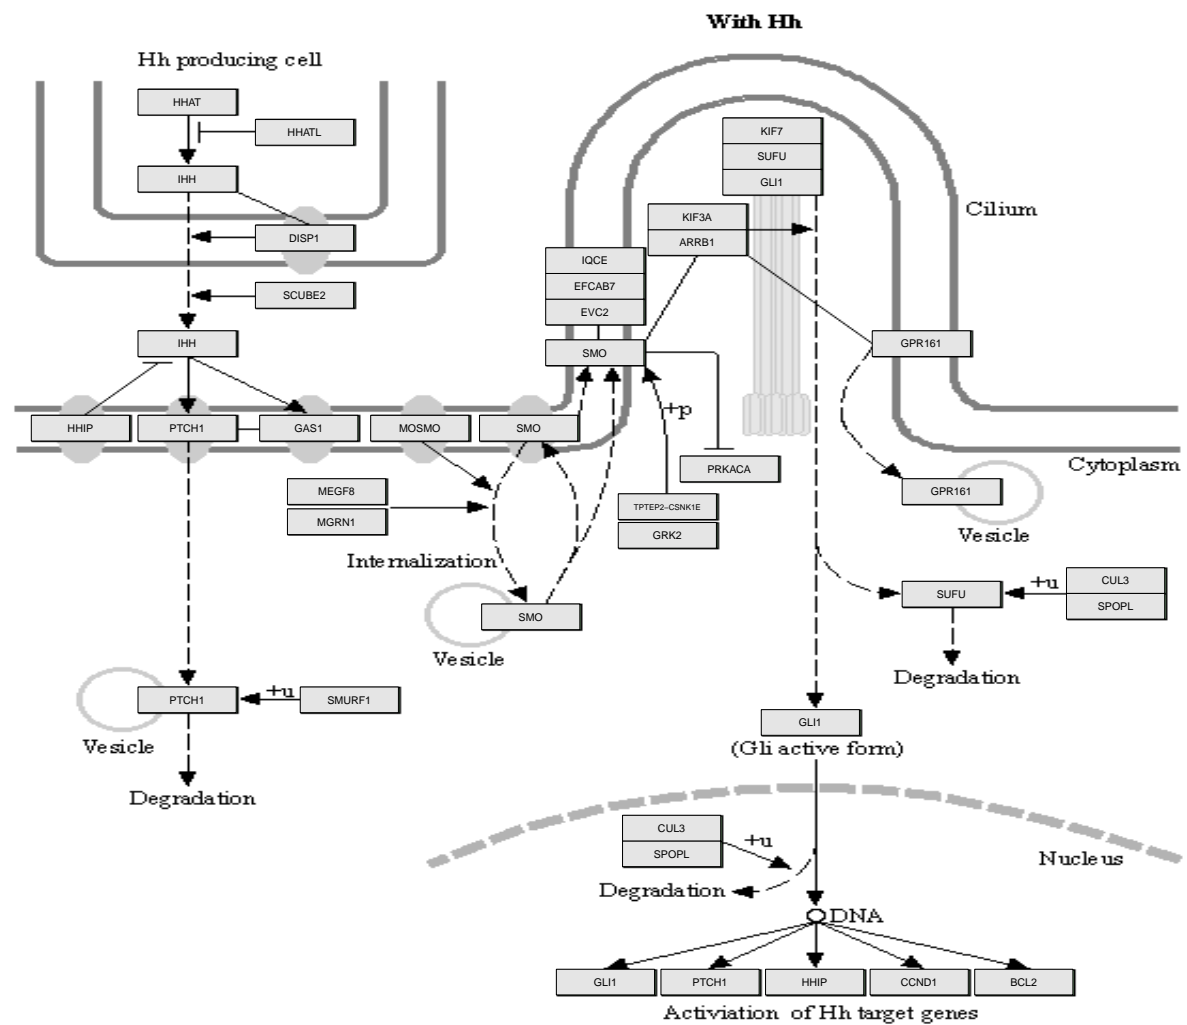

Cell proliferation, tissue patterning,  
stem cell maintenance, development, etc.









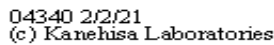

Supplement: s1 [file s1]
