# Supplementary material for: The Transcriptome and Methylome of the Developing and Aging Brain and Their Relations to Gliomas and Psychological Disorders
Source: MDPI journal article supplement (doi:10.3390/cells11030362), 2022-01-21

Calcium signaling pathway

all genes

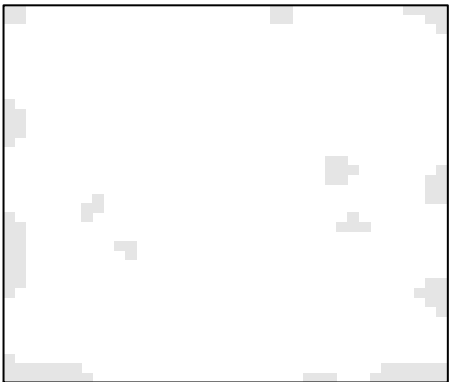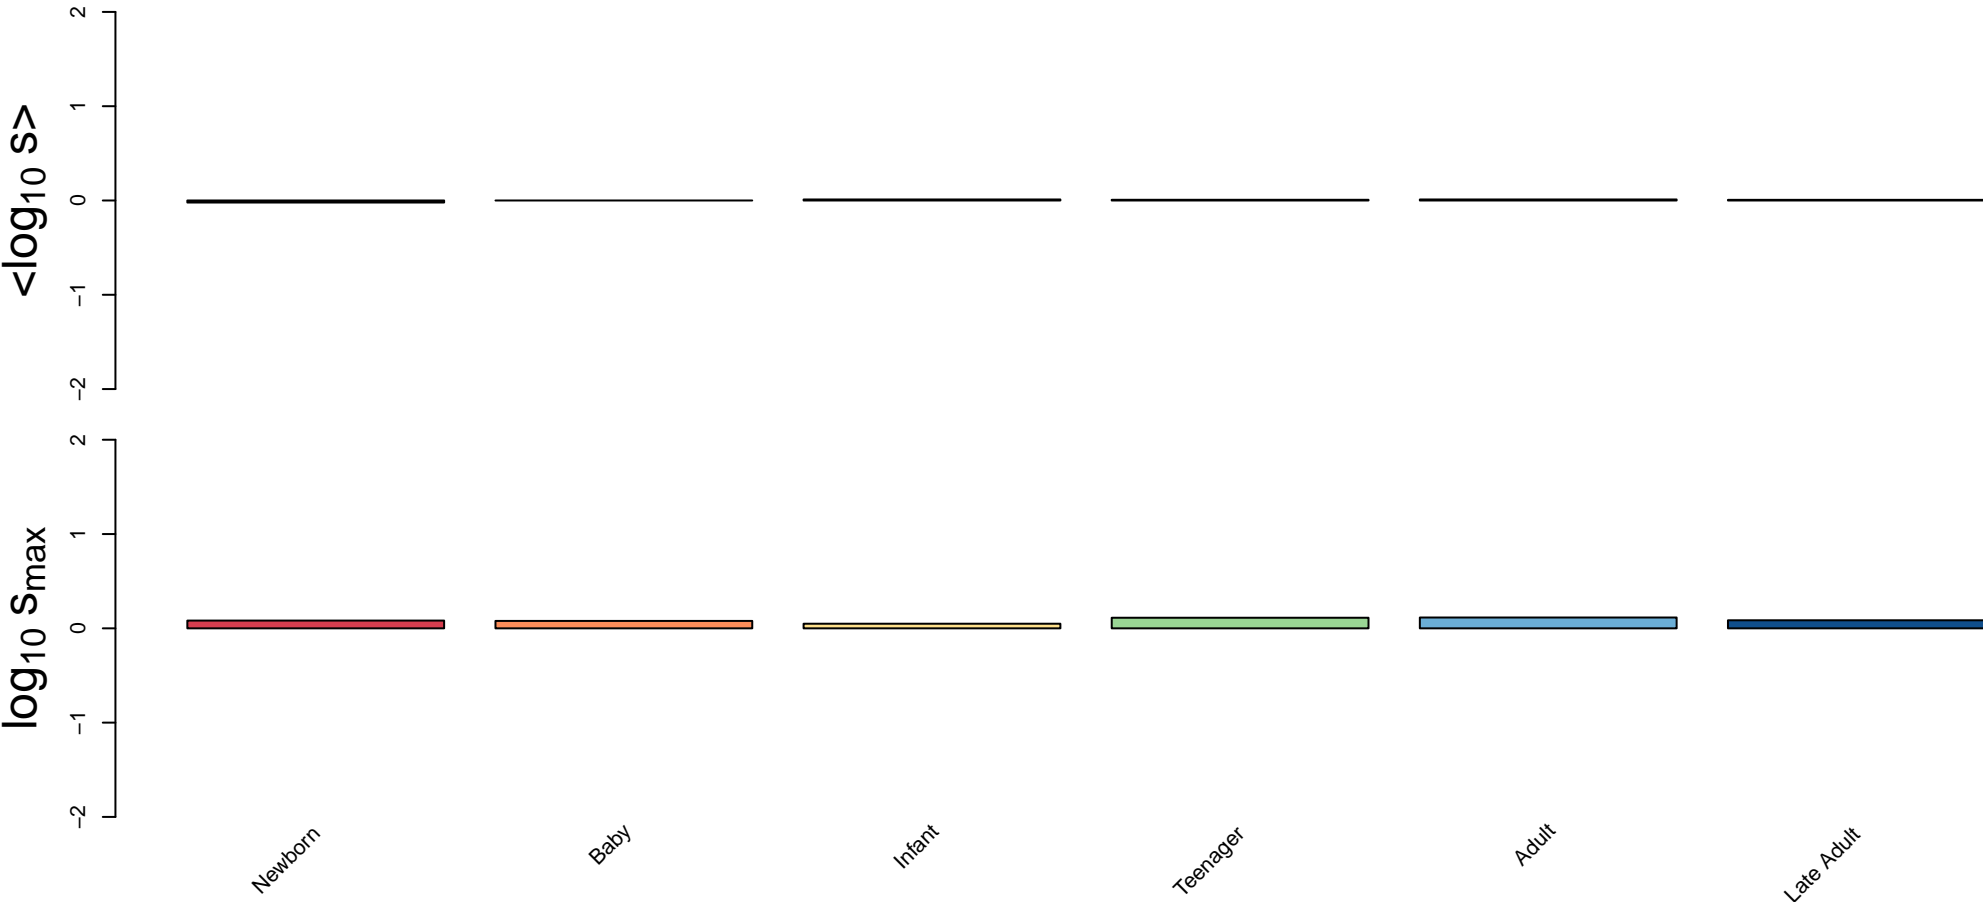

Calcium signaling pathway  
genes with data

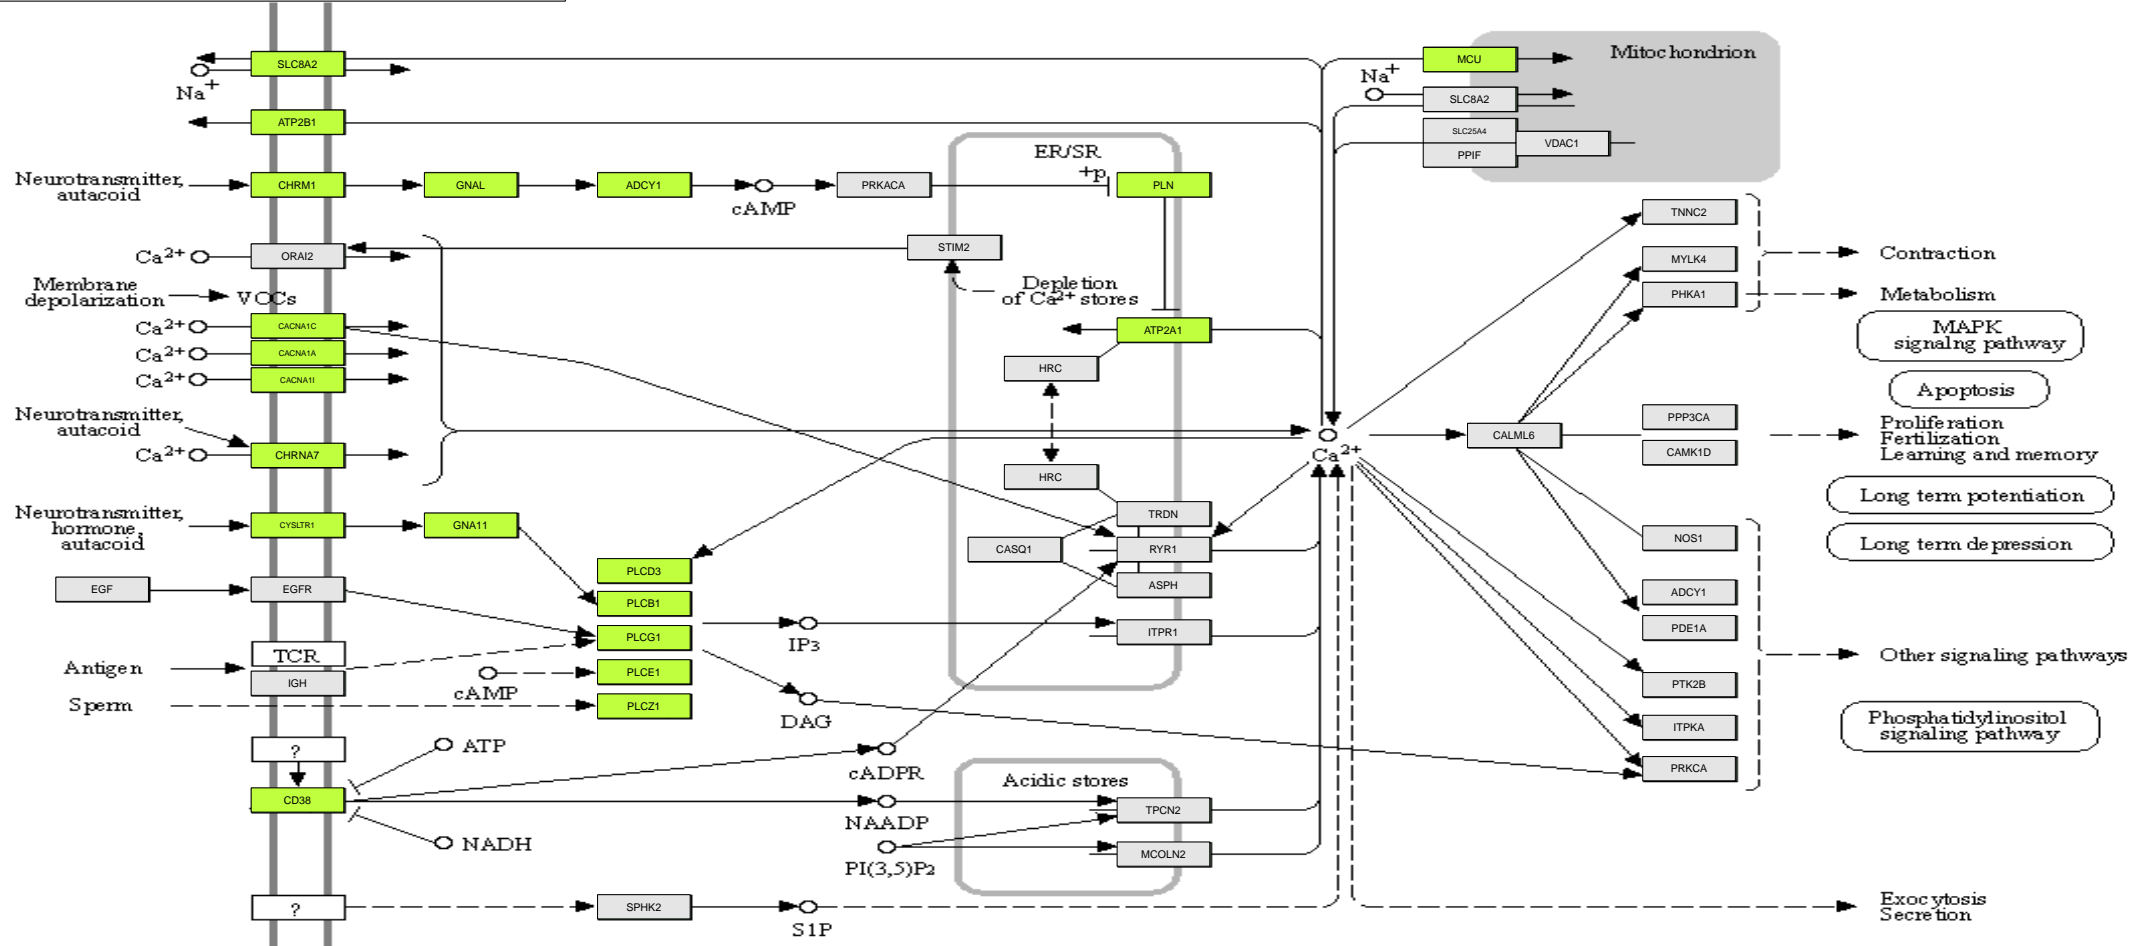

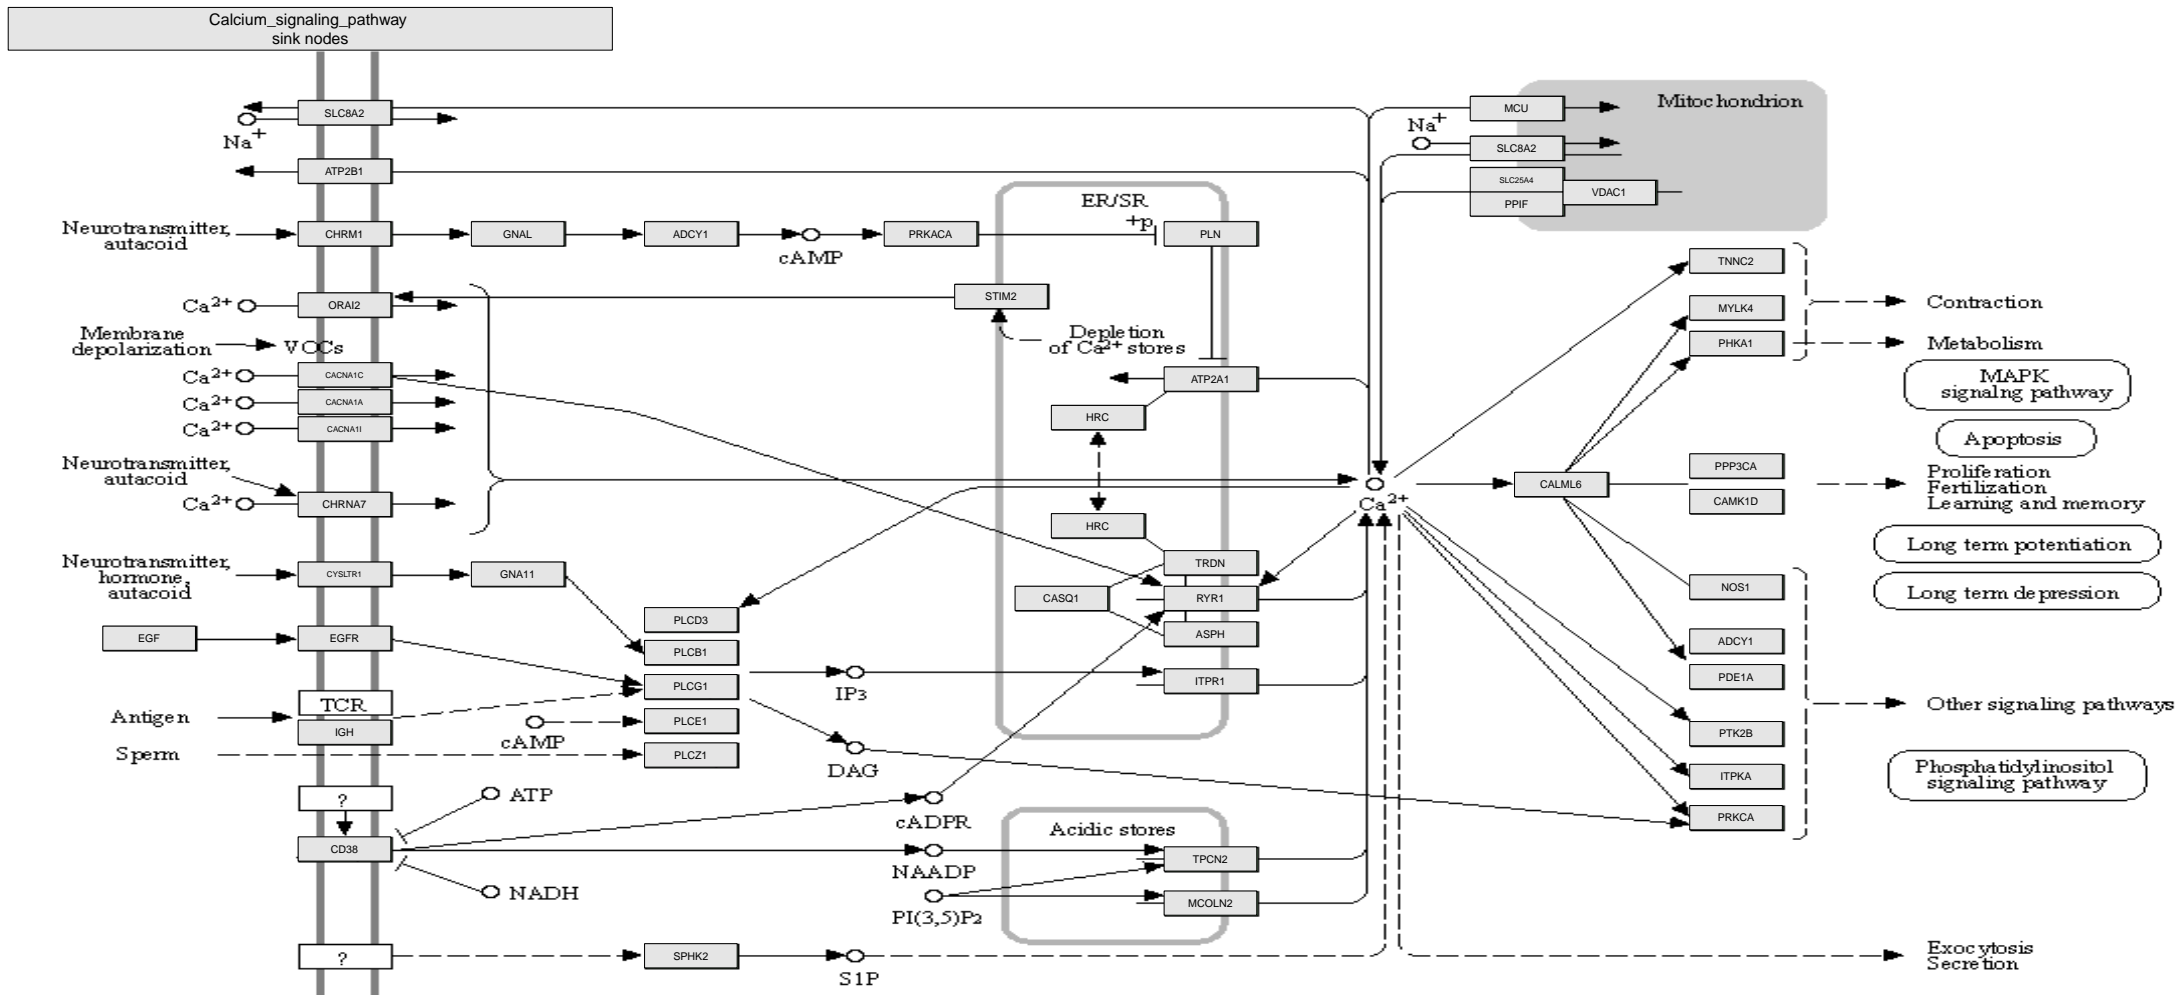

# Calcium signaling pathway Newborn

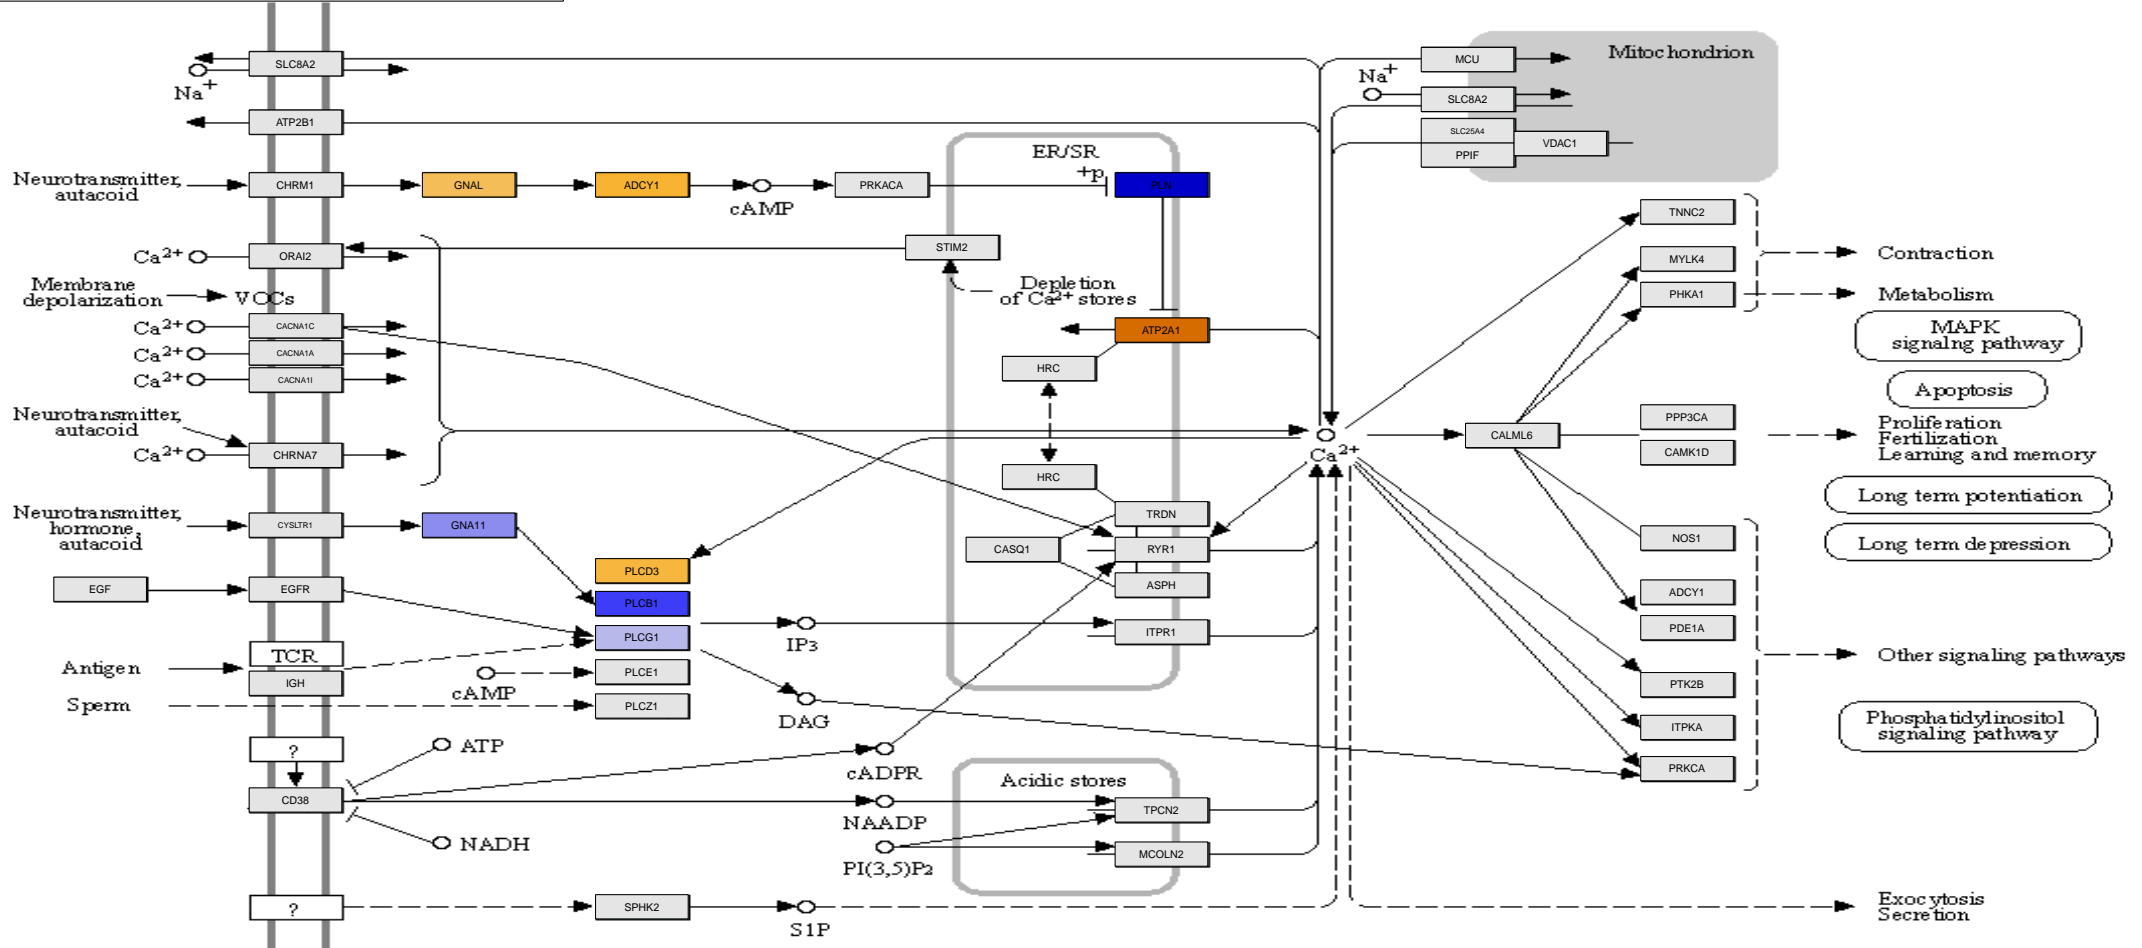

# Calcium signaling pathway

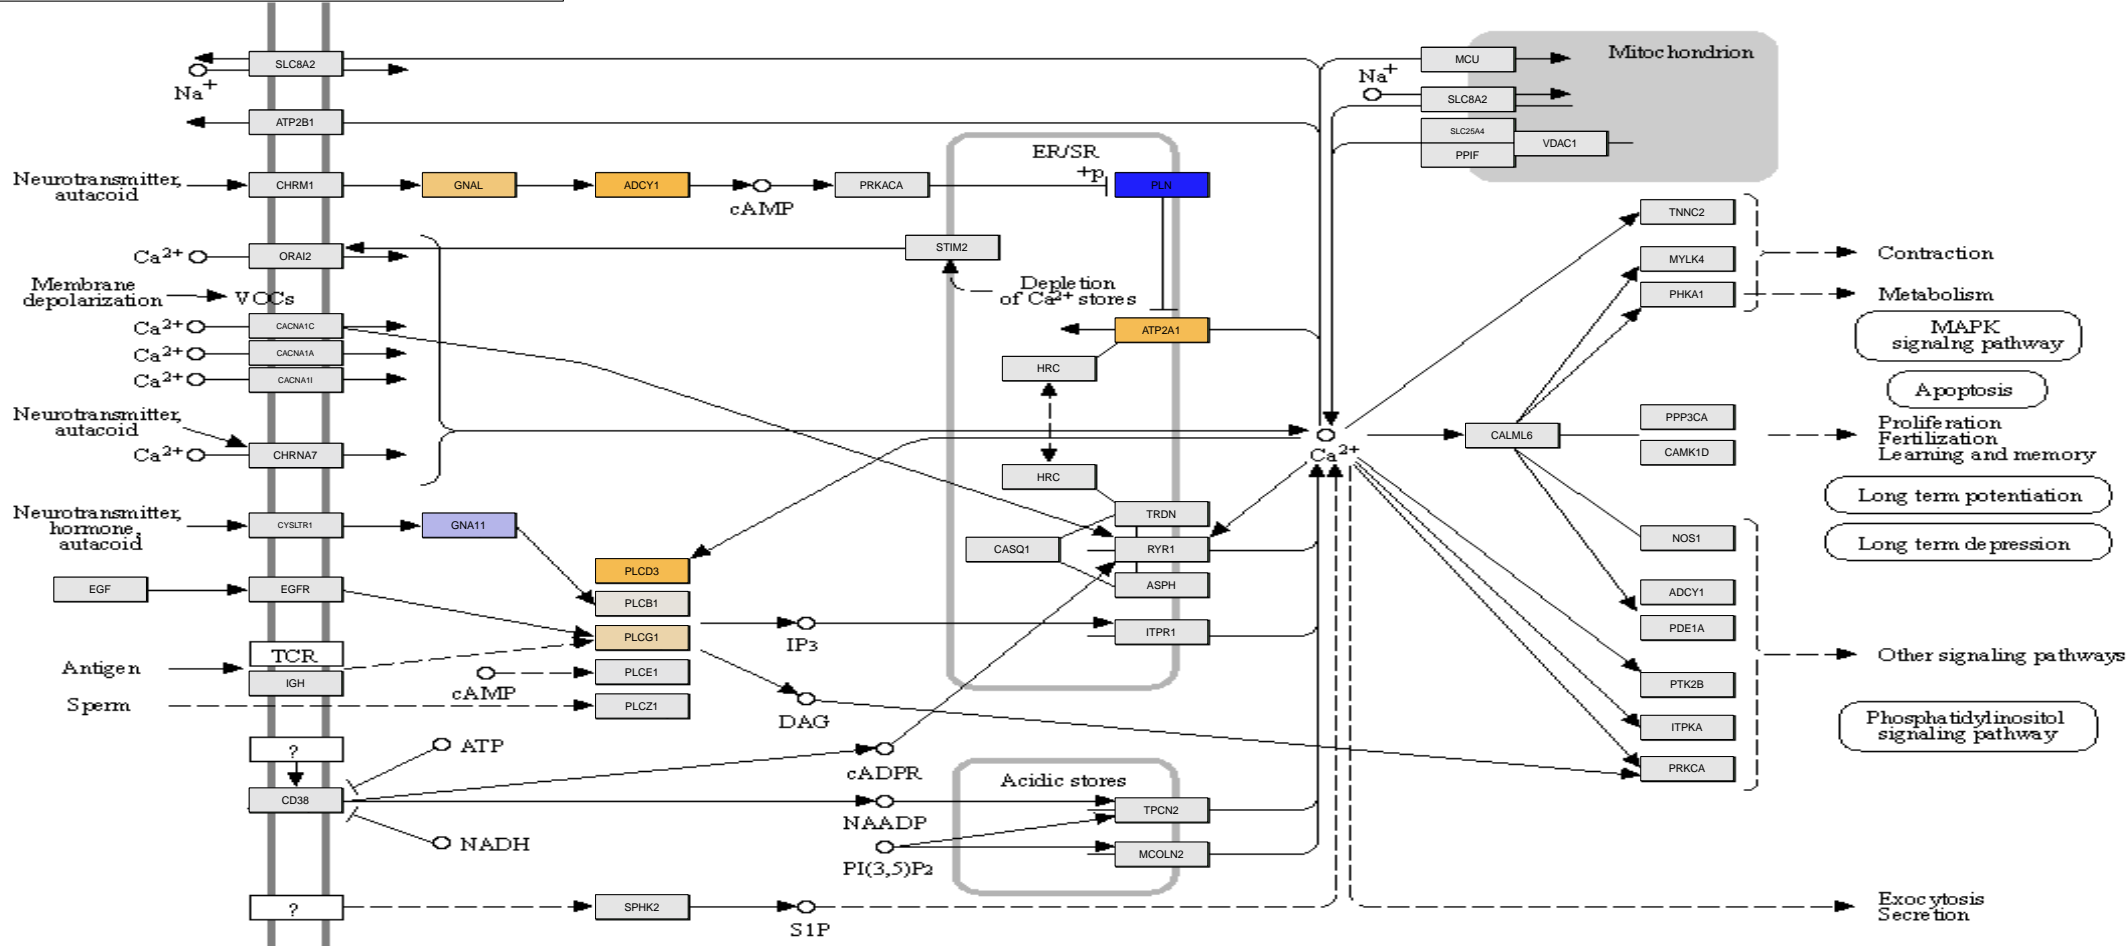

# Calcium signaling pathway Infant

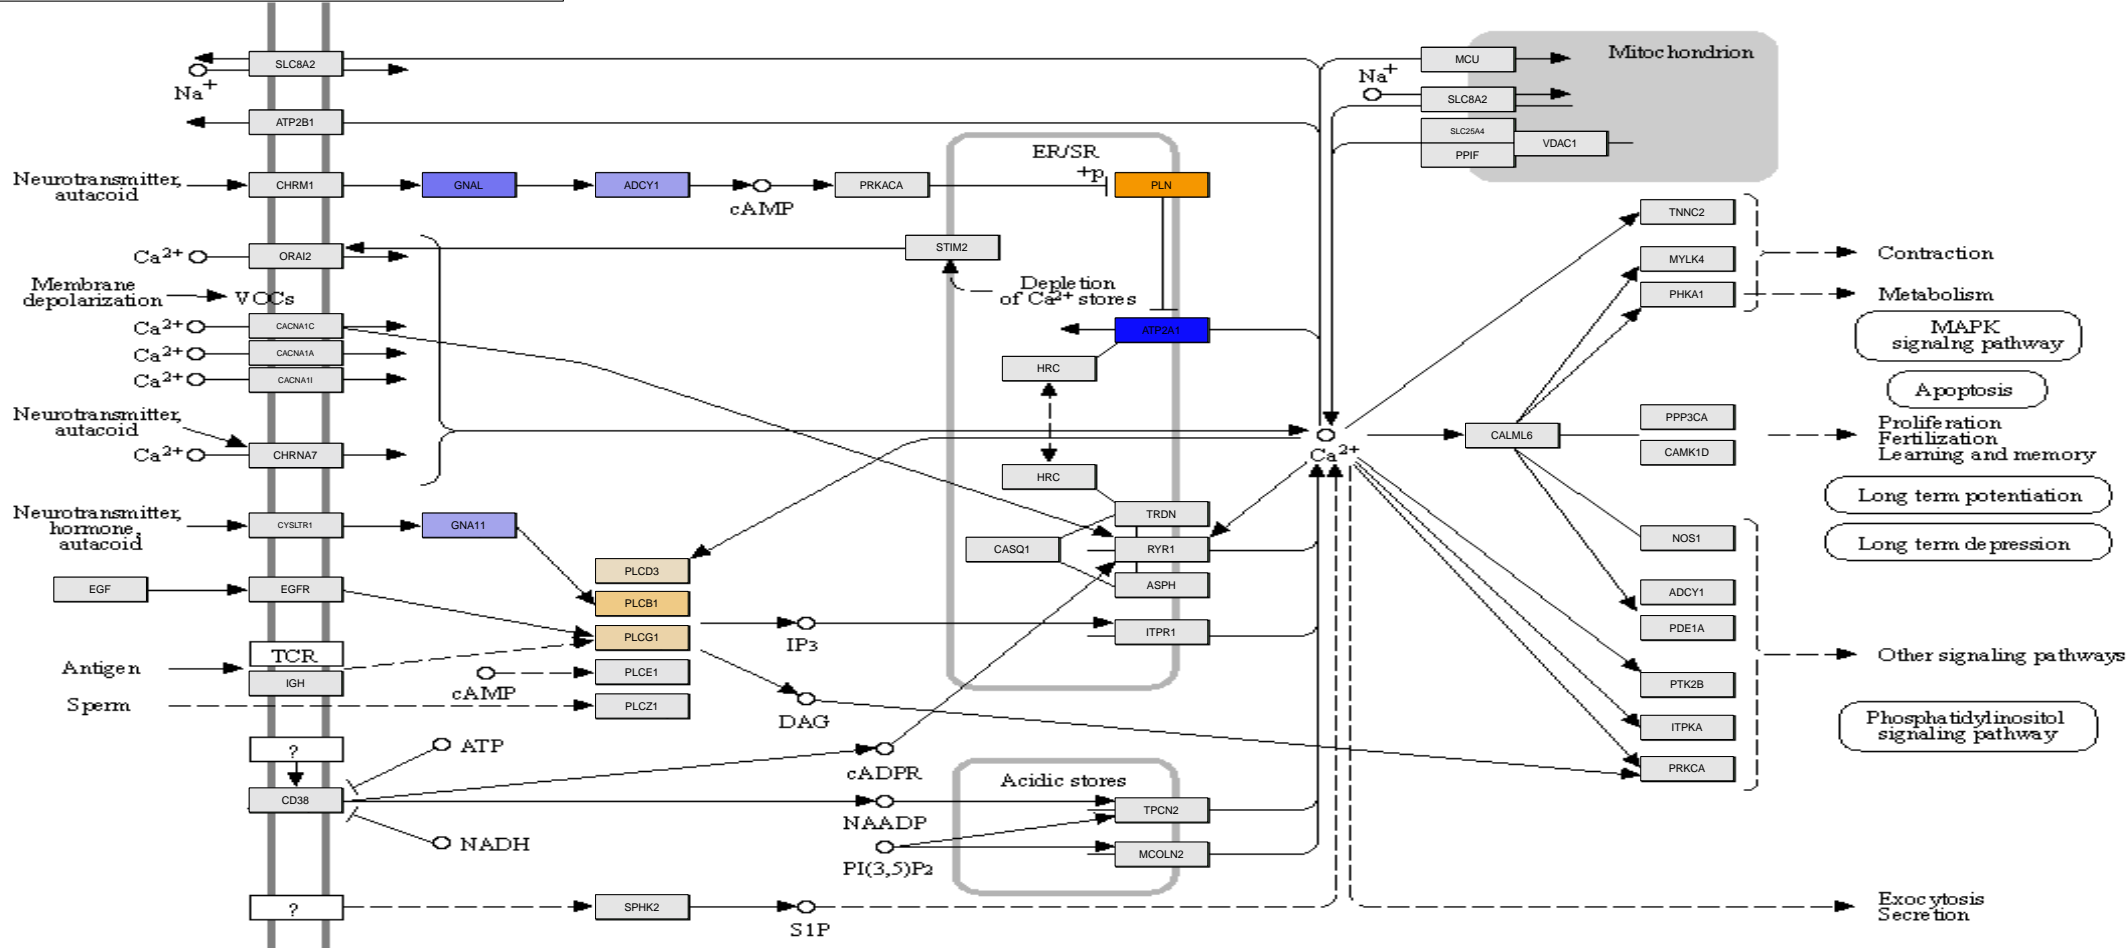

# Calcium signaling pathway Teenager

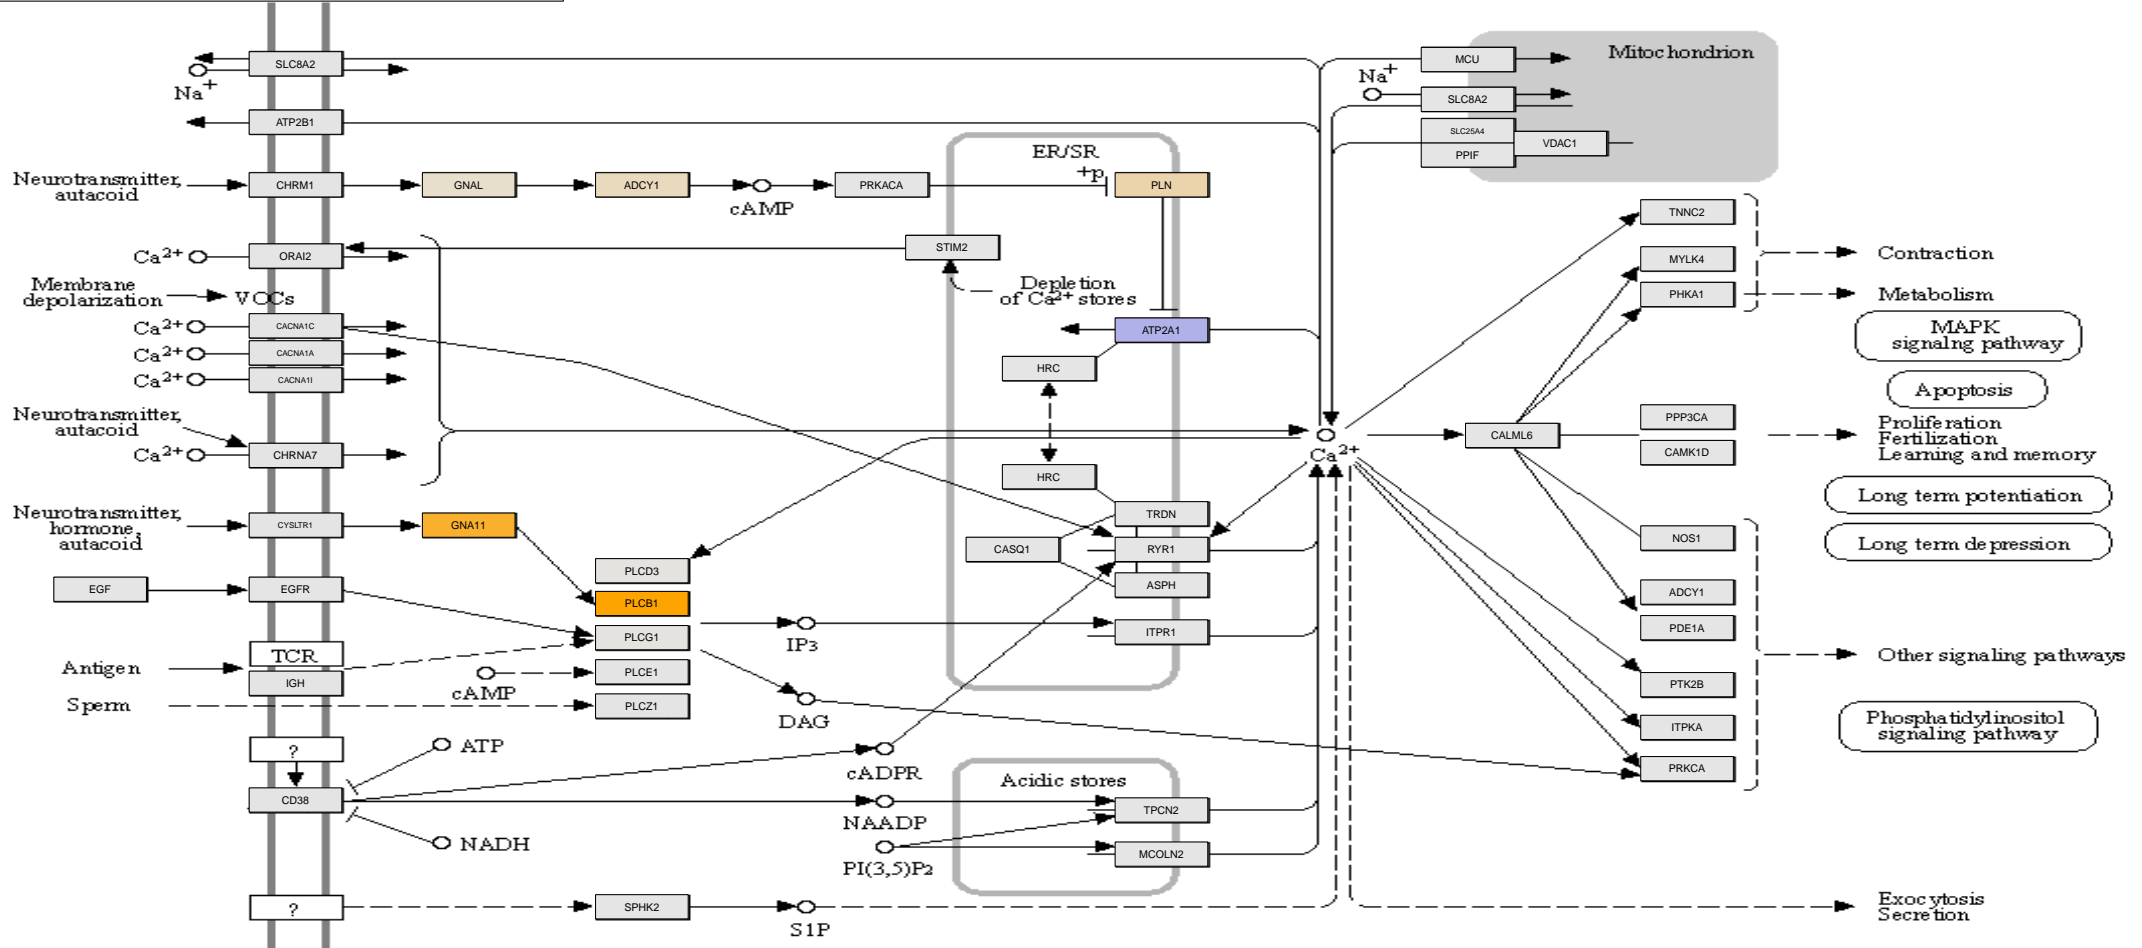

# Calcium signaling pathway Adult

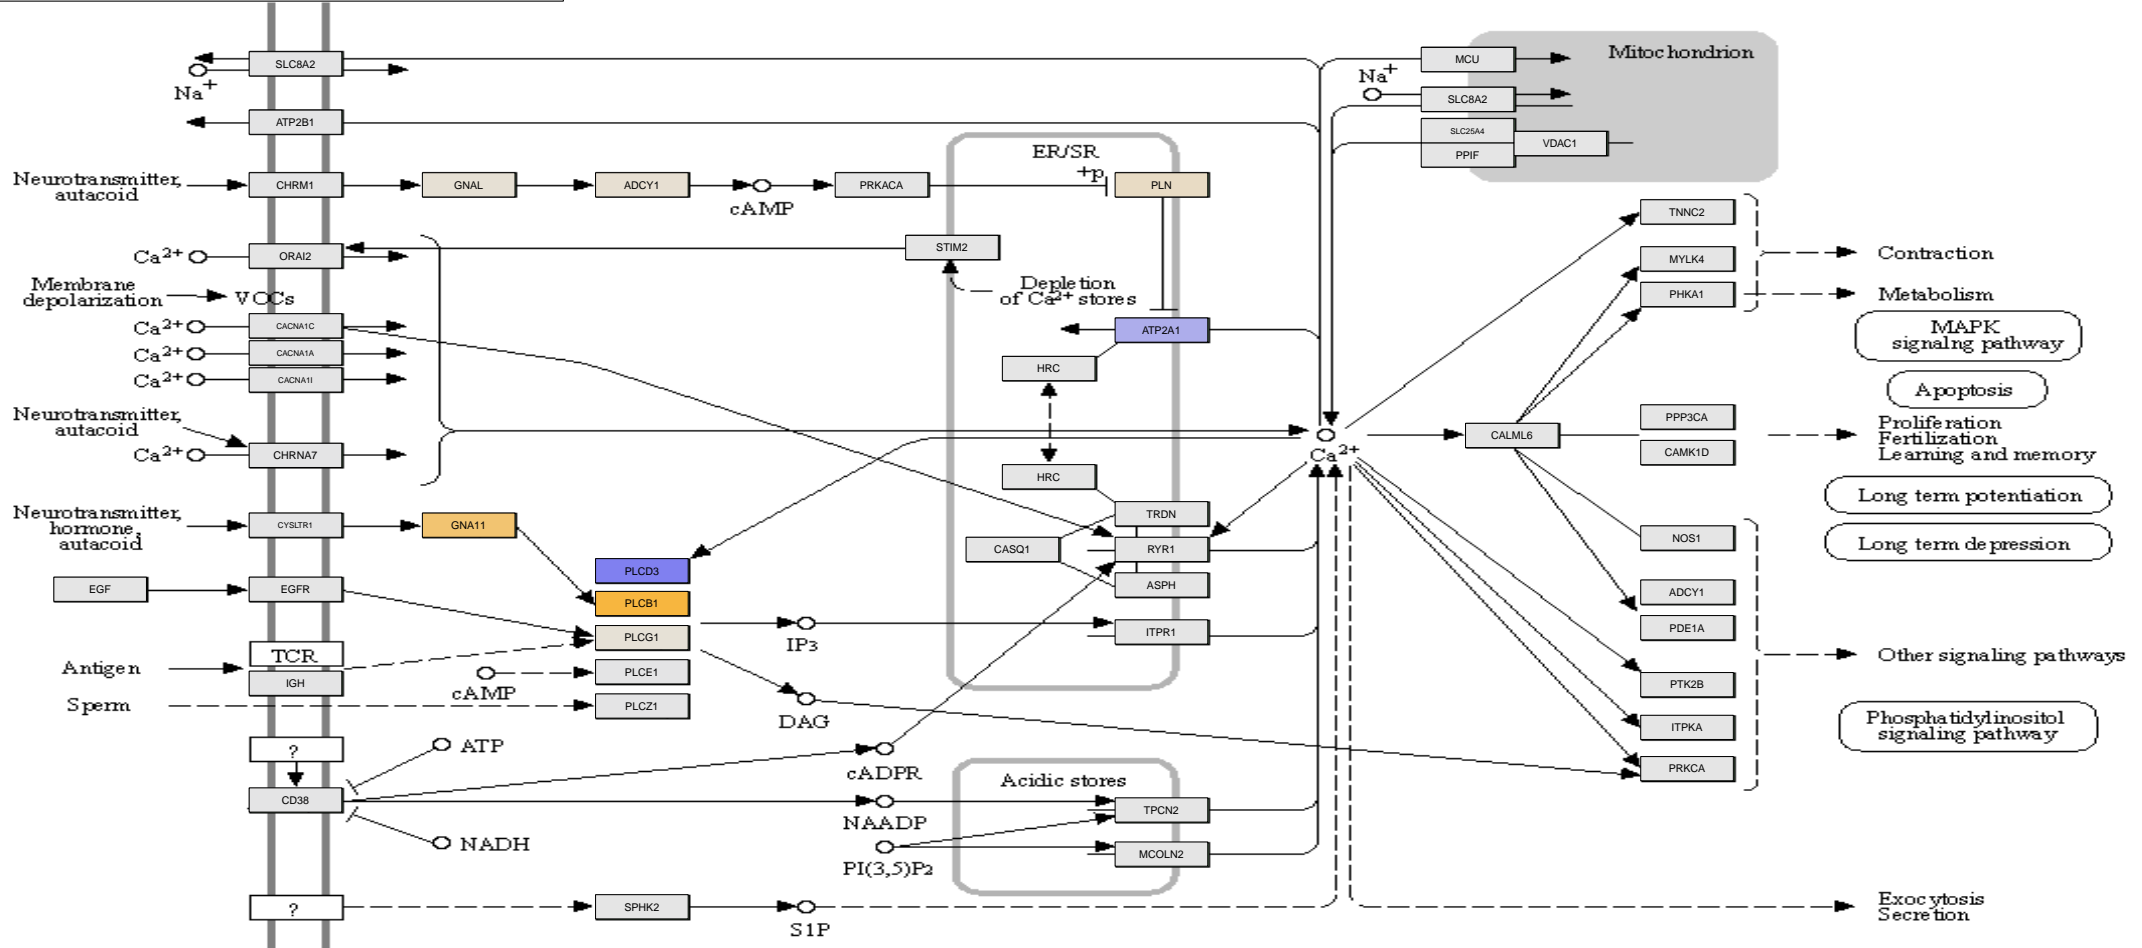



Calcium signaling pathway  
Late Adult

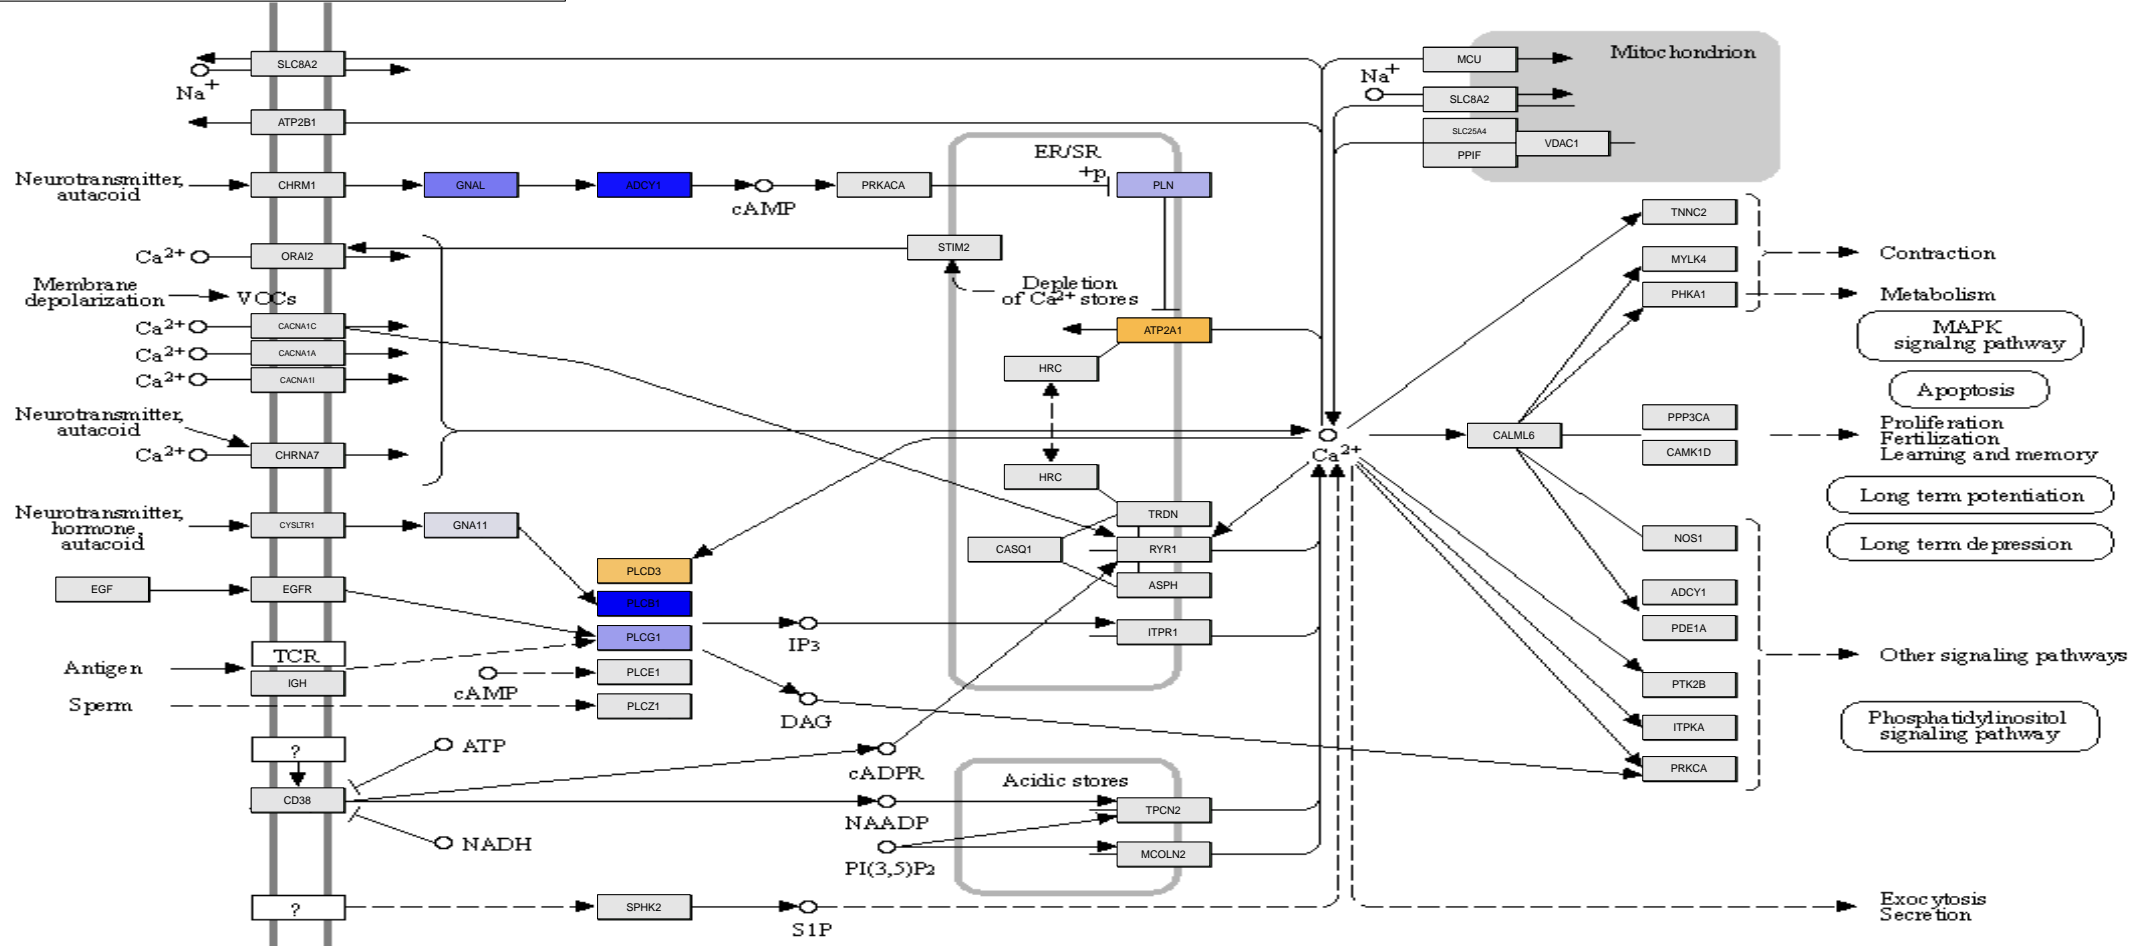

Supplement: s1 [file s1]
