# Supplementary material for: The Transcriptome and Methylome of the Developing and Aging Brain and Their Relations to Gliomas and Psychological Disorders
Source: MDPI journal article supplement (doi:10.3390/cells11030362), 2022-01-21

mTOR signaling pathway

all genes

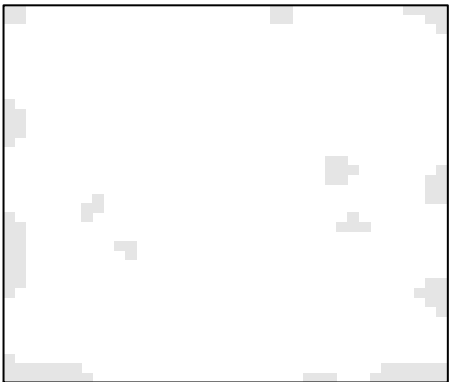

maximum = -Inf

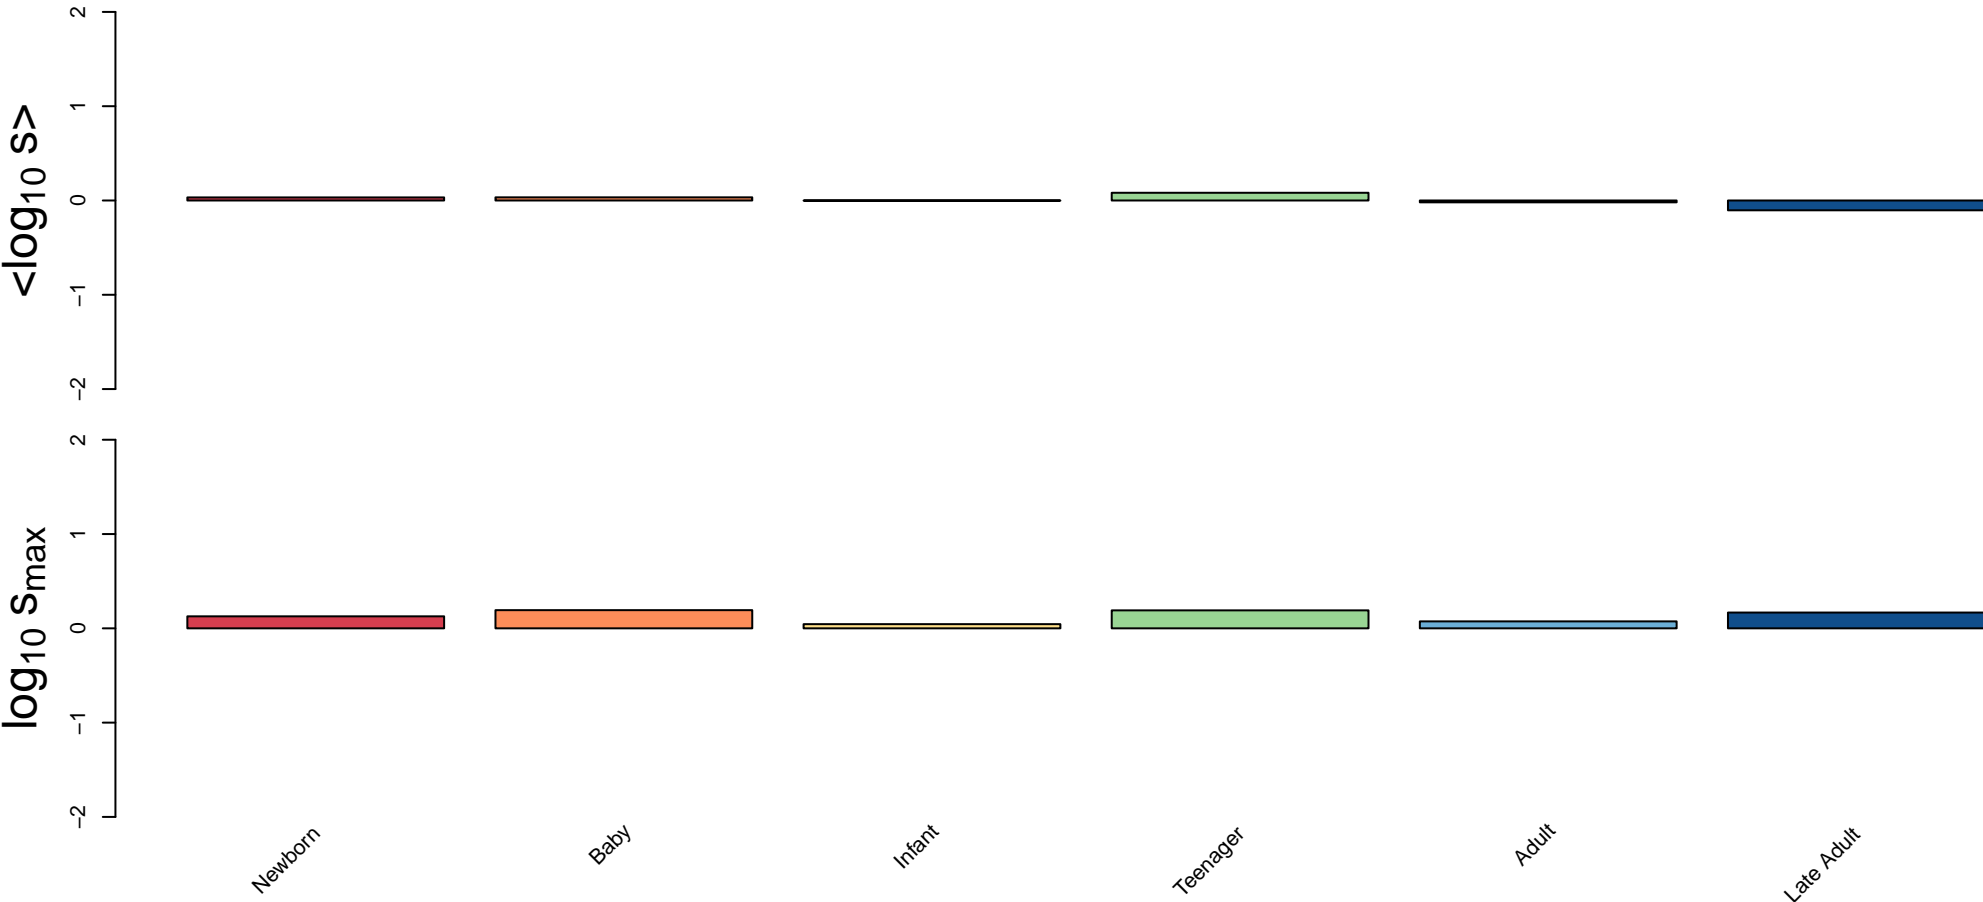

mTOR\_signaling\_pathway  
genes with data

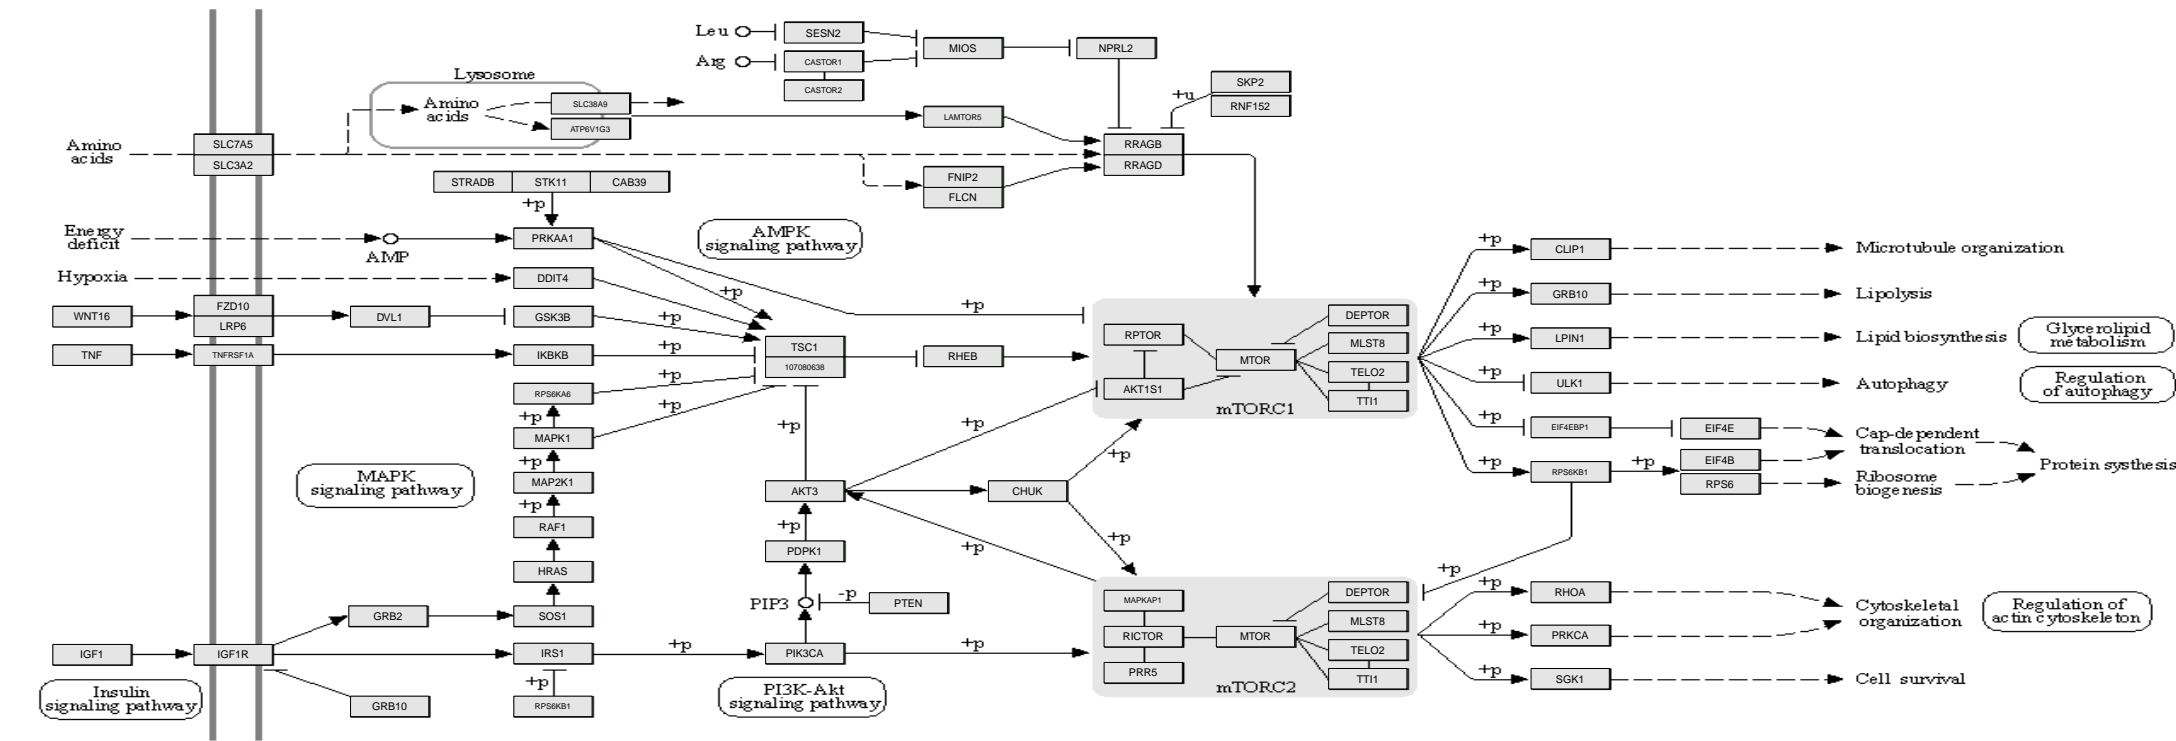

mTOR\_signaling\_pathway  
sink nodes



mTOR\_signaling\_pathway  
Newborn



mTOR\_signaling\_pathway  
Baby



mTOR\_signaling\_pathway  
Infant



mTOR\_signaling\_pathway  
Teenager



mTOR\_signaling\_pathway  
Adult

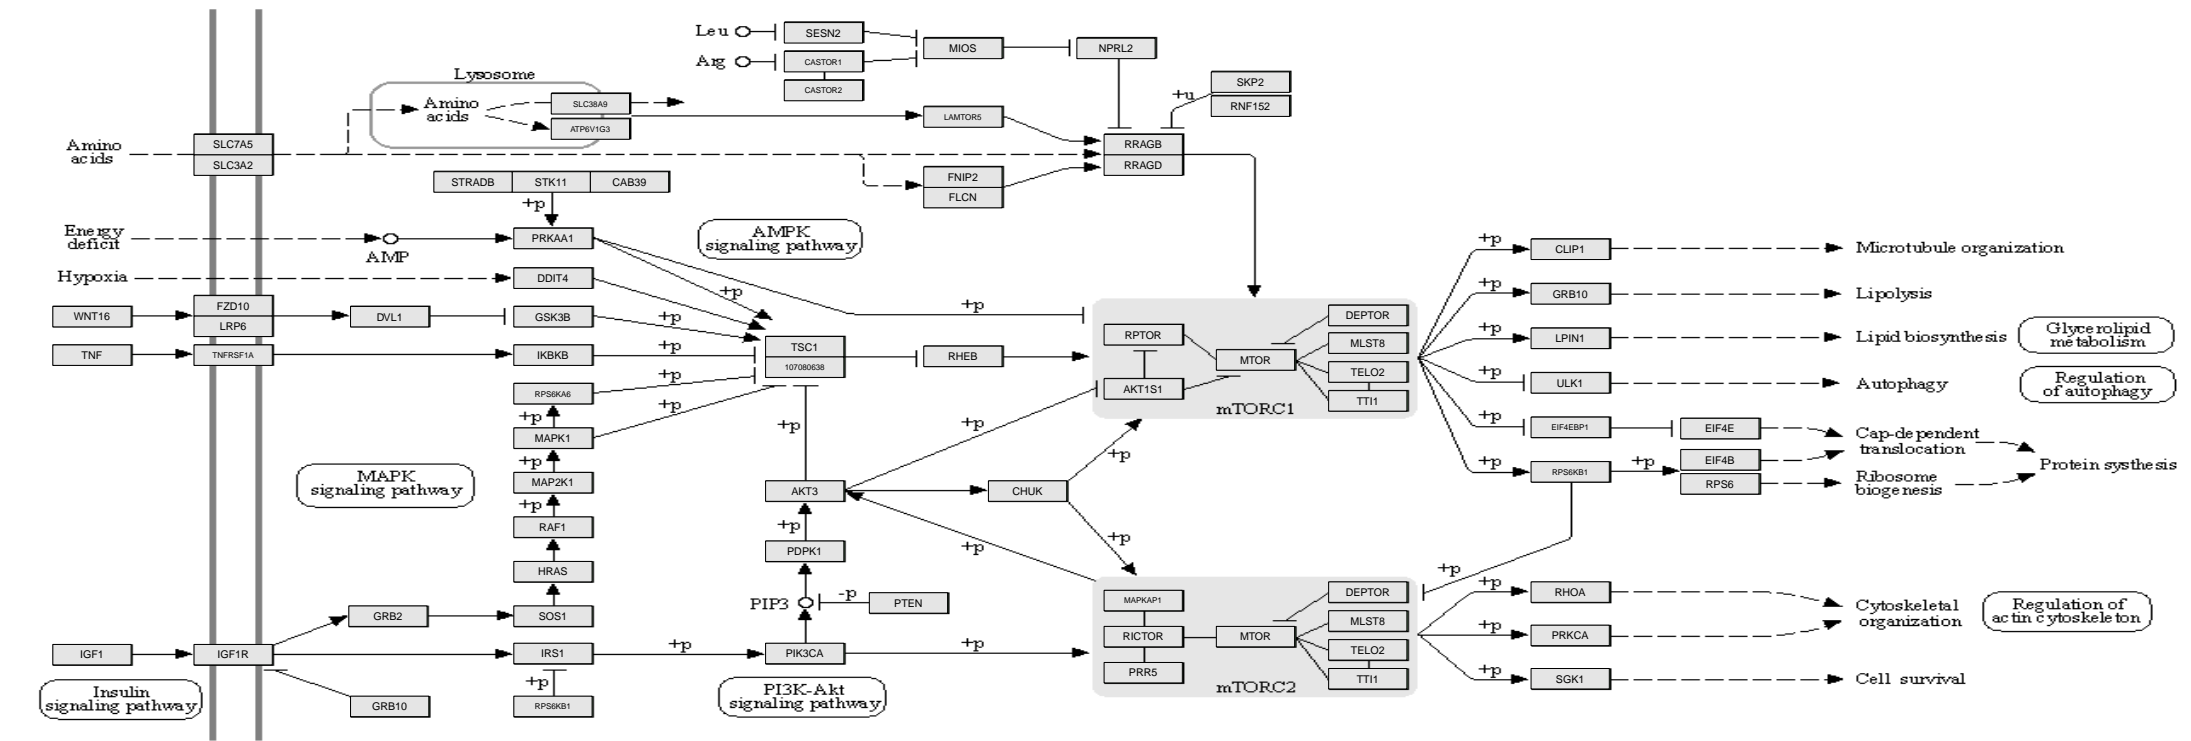



mTOR\_signaling\_pathway  
Late Adult

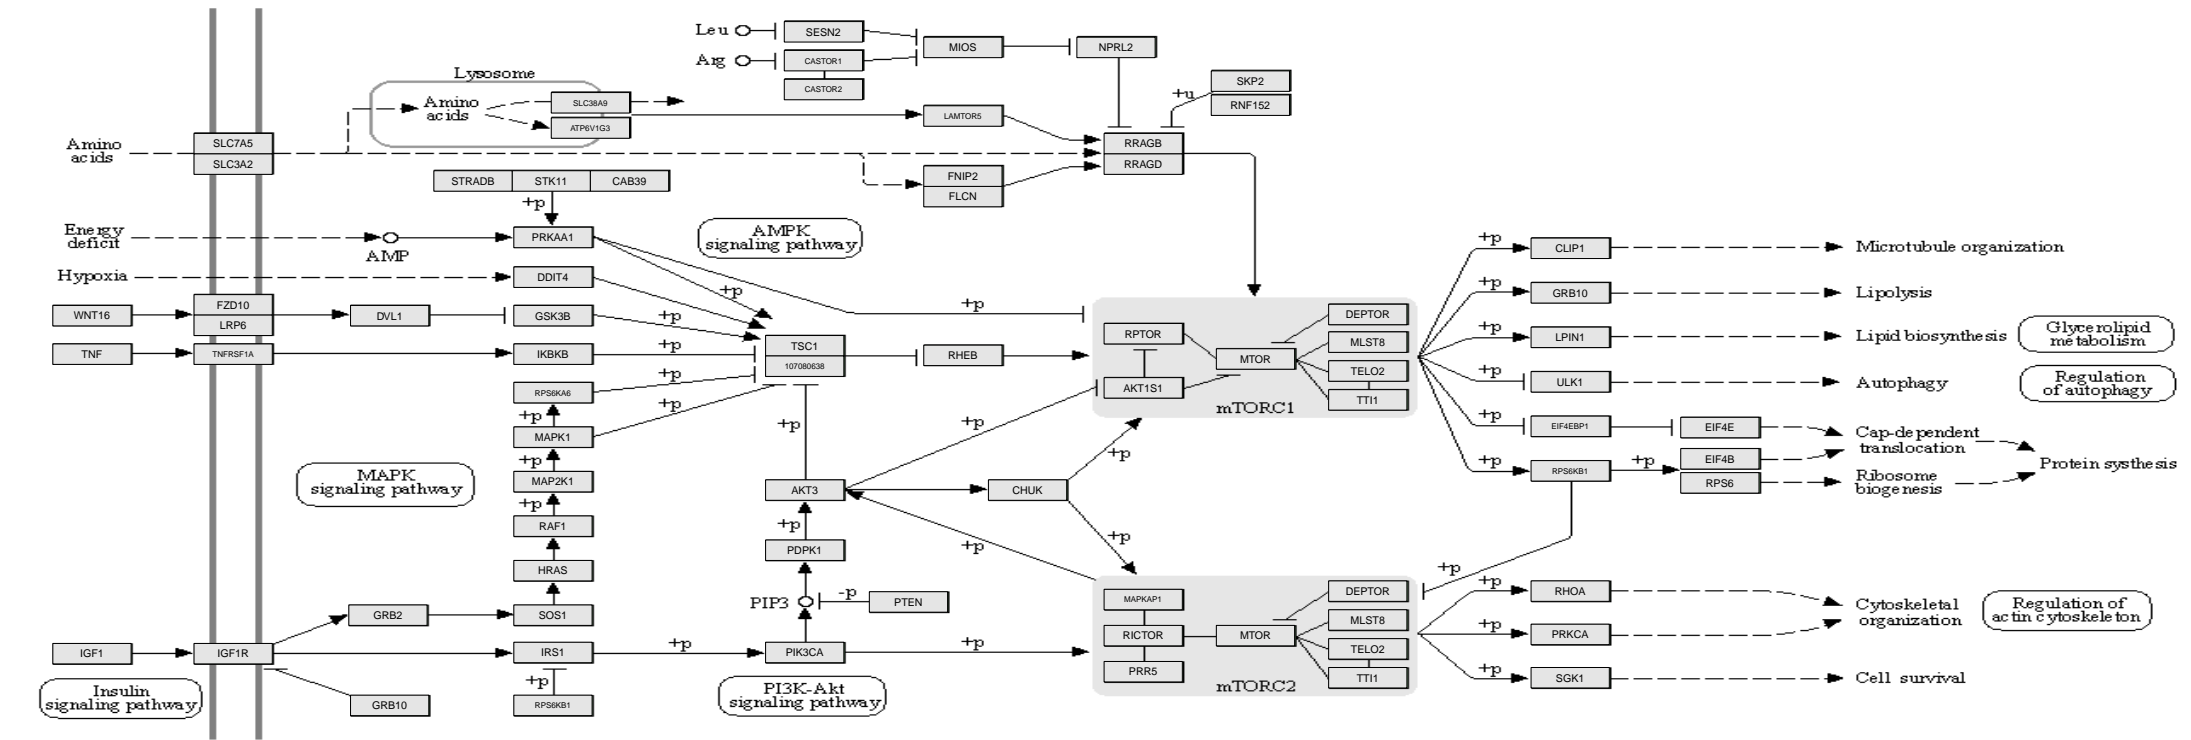

Supplement: s1 [file s1]
