# Supplementary material for: The Transcriptome and Methylome of the Developing and Aging Brain and Their Relations to Gliomas and Psychological Disorders
Source: MDPI journal article supplement (doi:10.3390/cells11030362), 2022-01-21

AGE-RAGE signaling pathway in dia

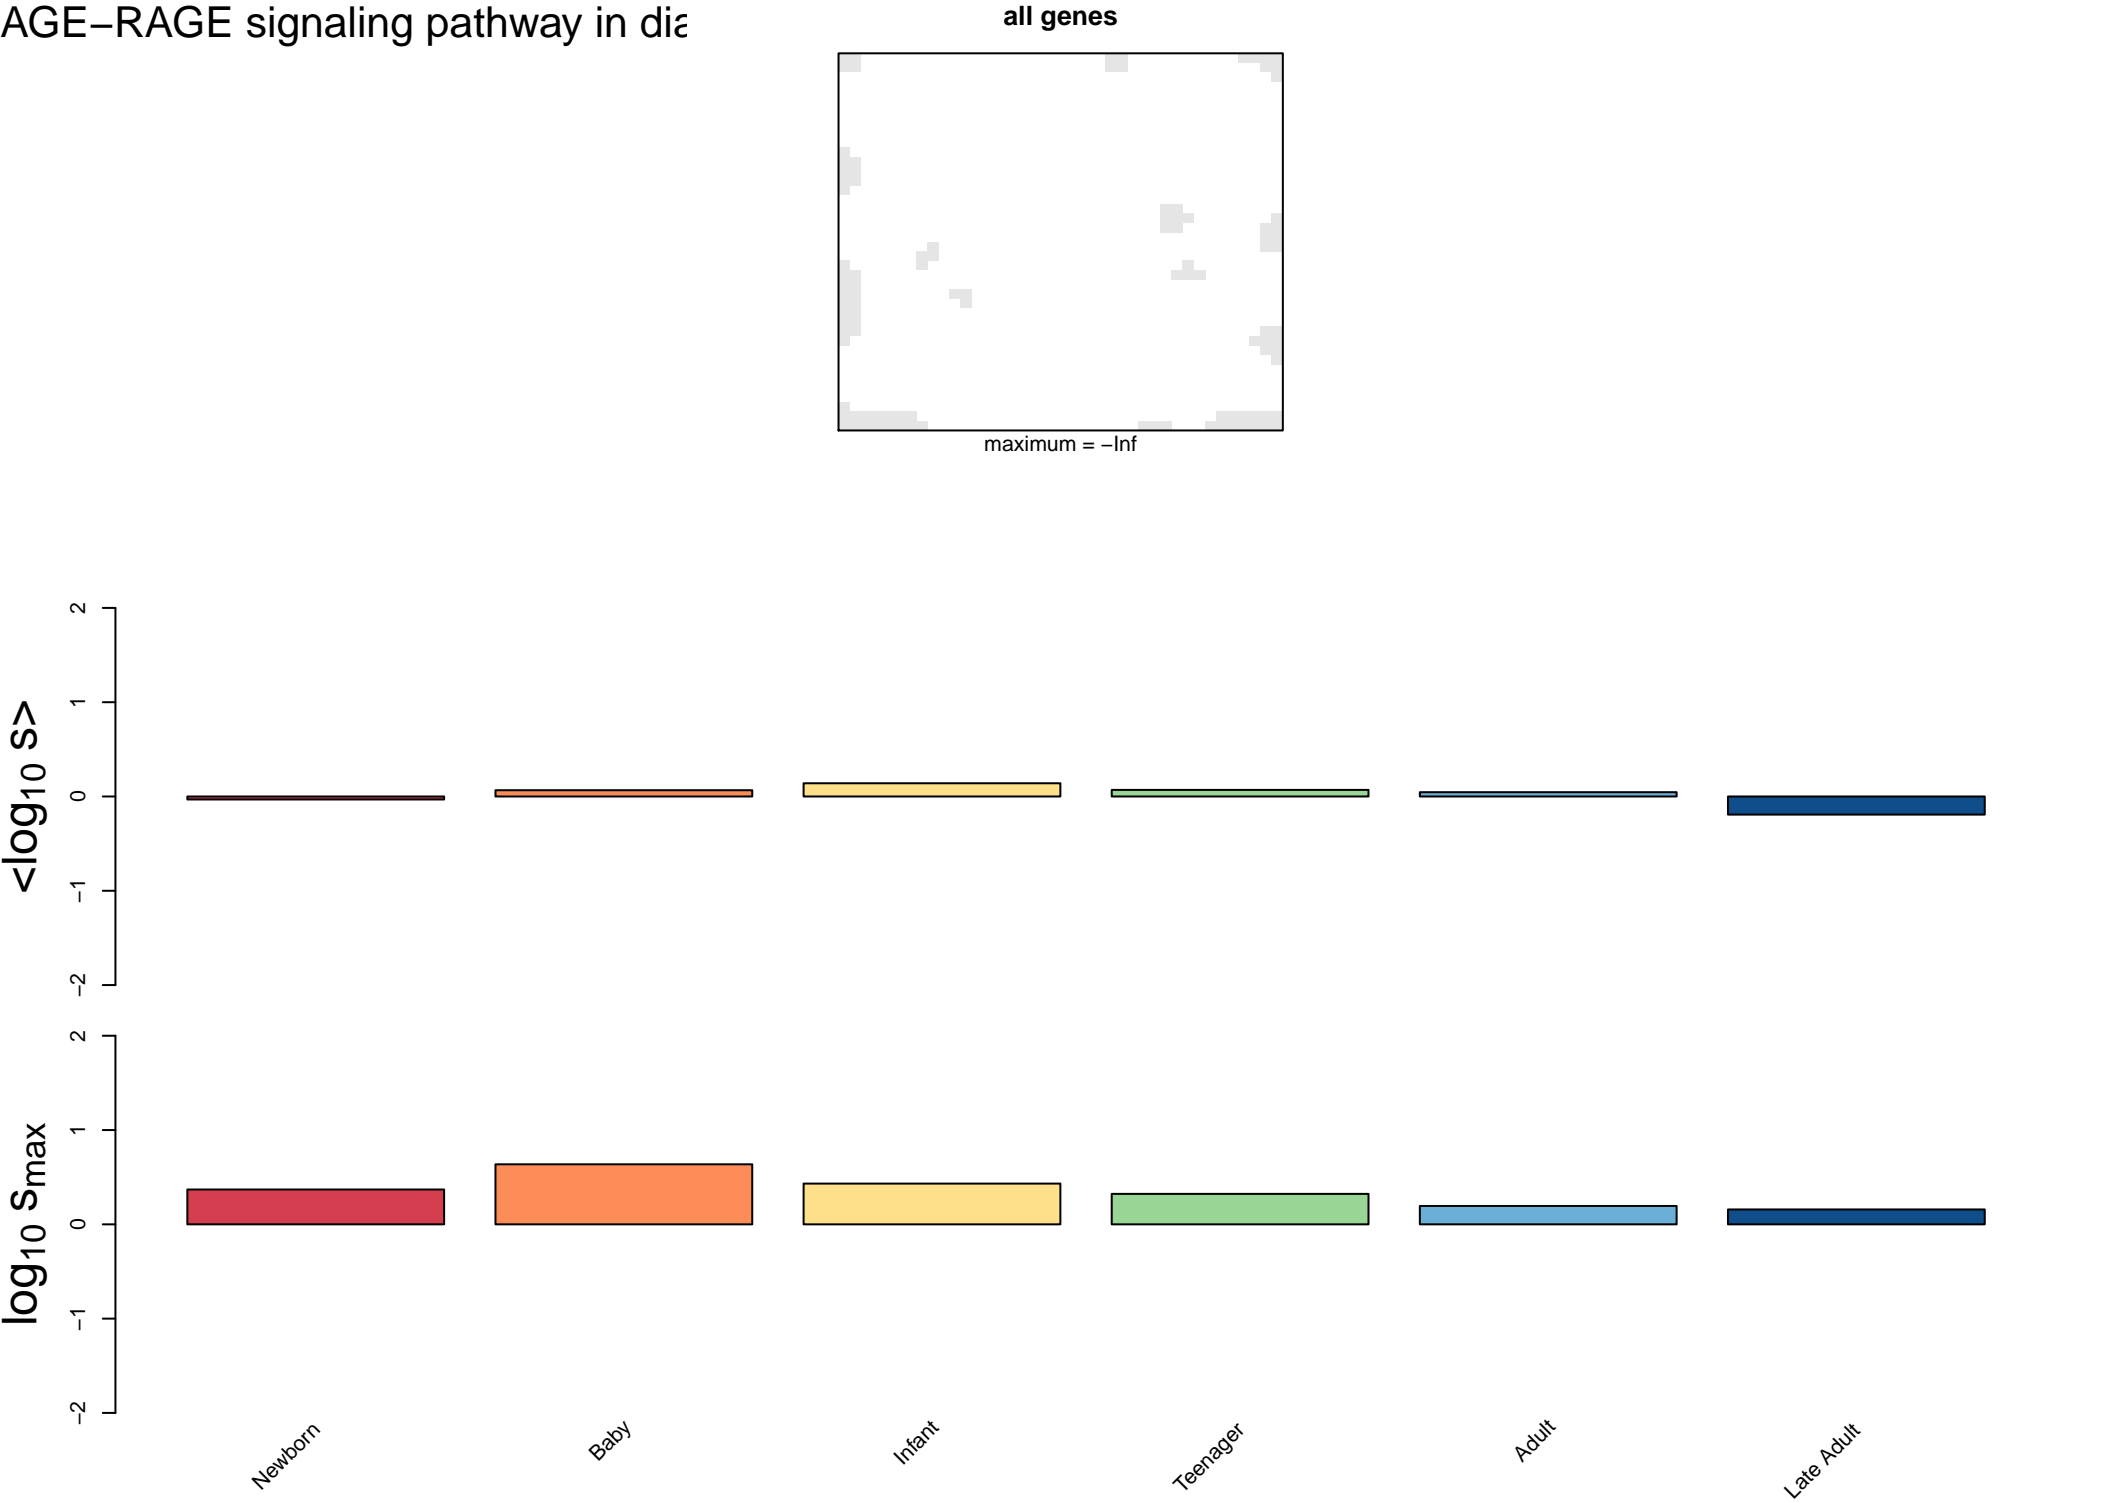

AGE\_RAGE\_signaling\_pathway\_in\_diabetic\_complications  
genes with data

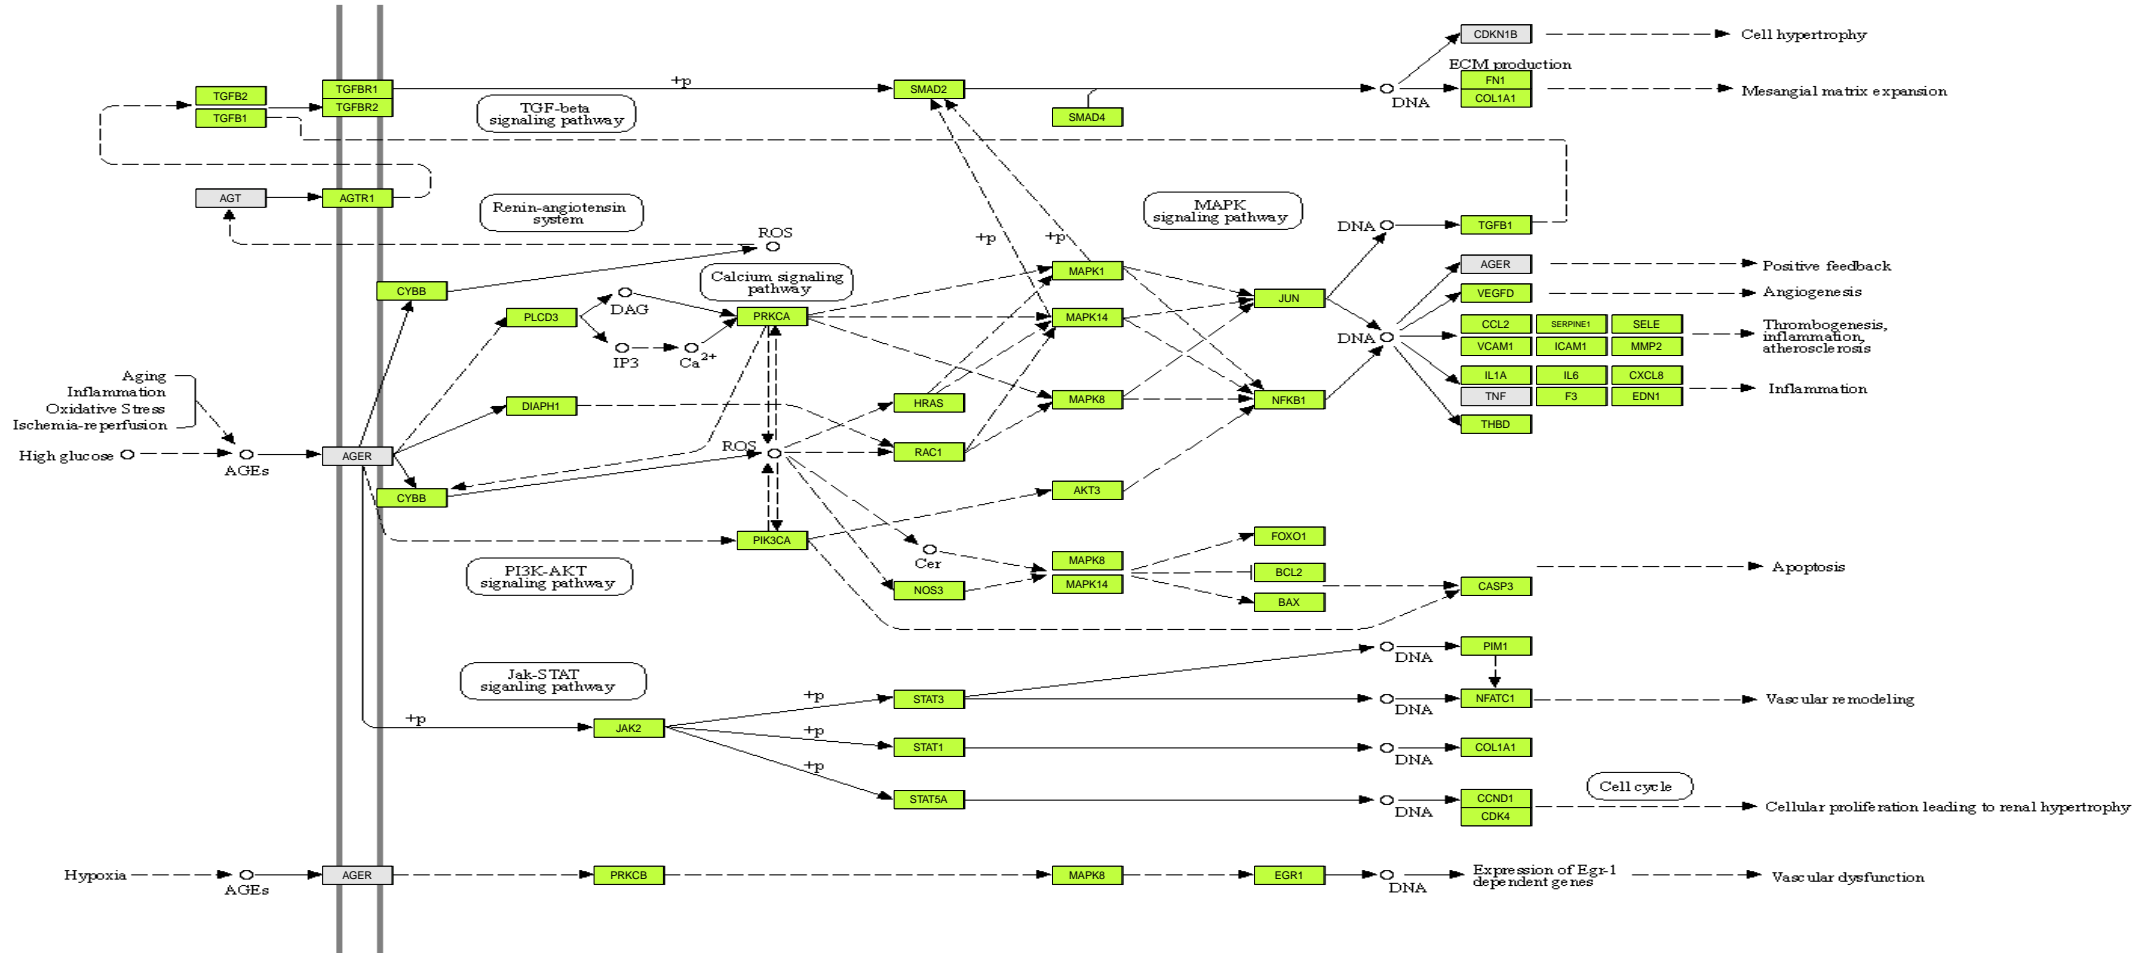

AGE\_RAGE\_signaling\_pathway\_in\_diabetic\_complications  
sink nodes

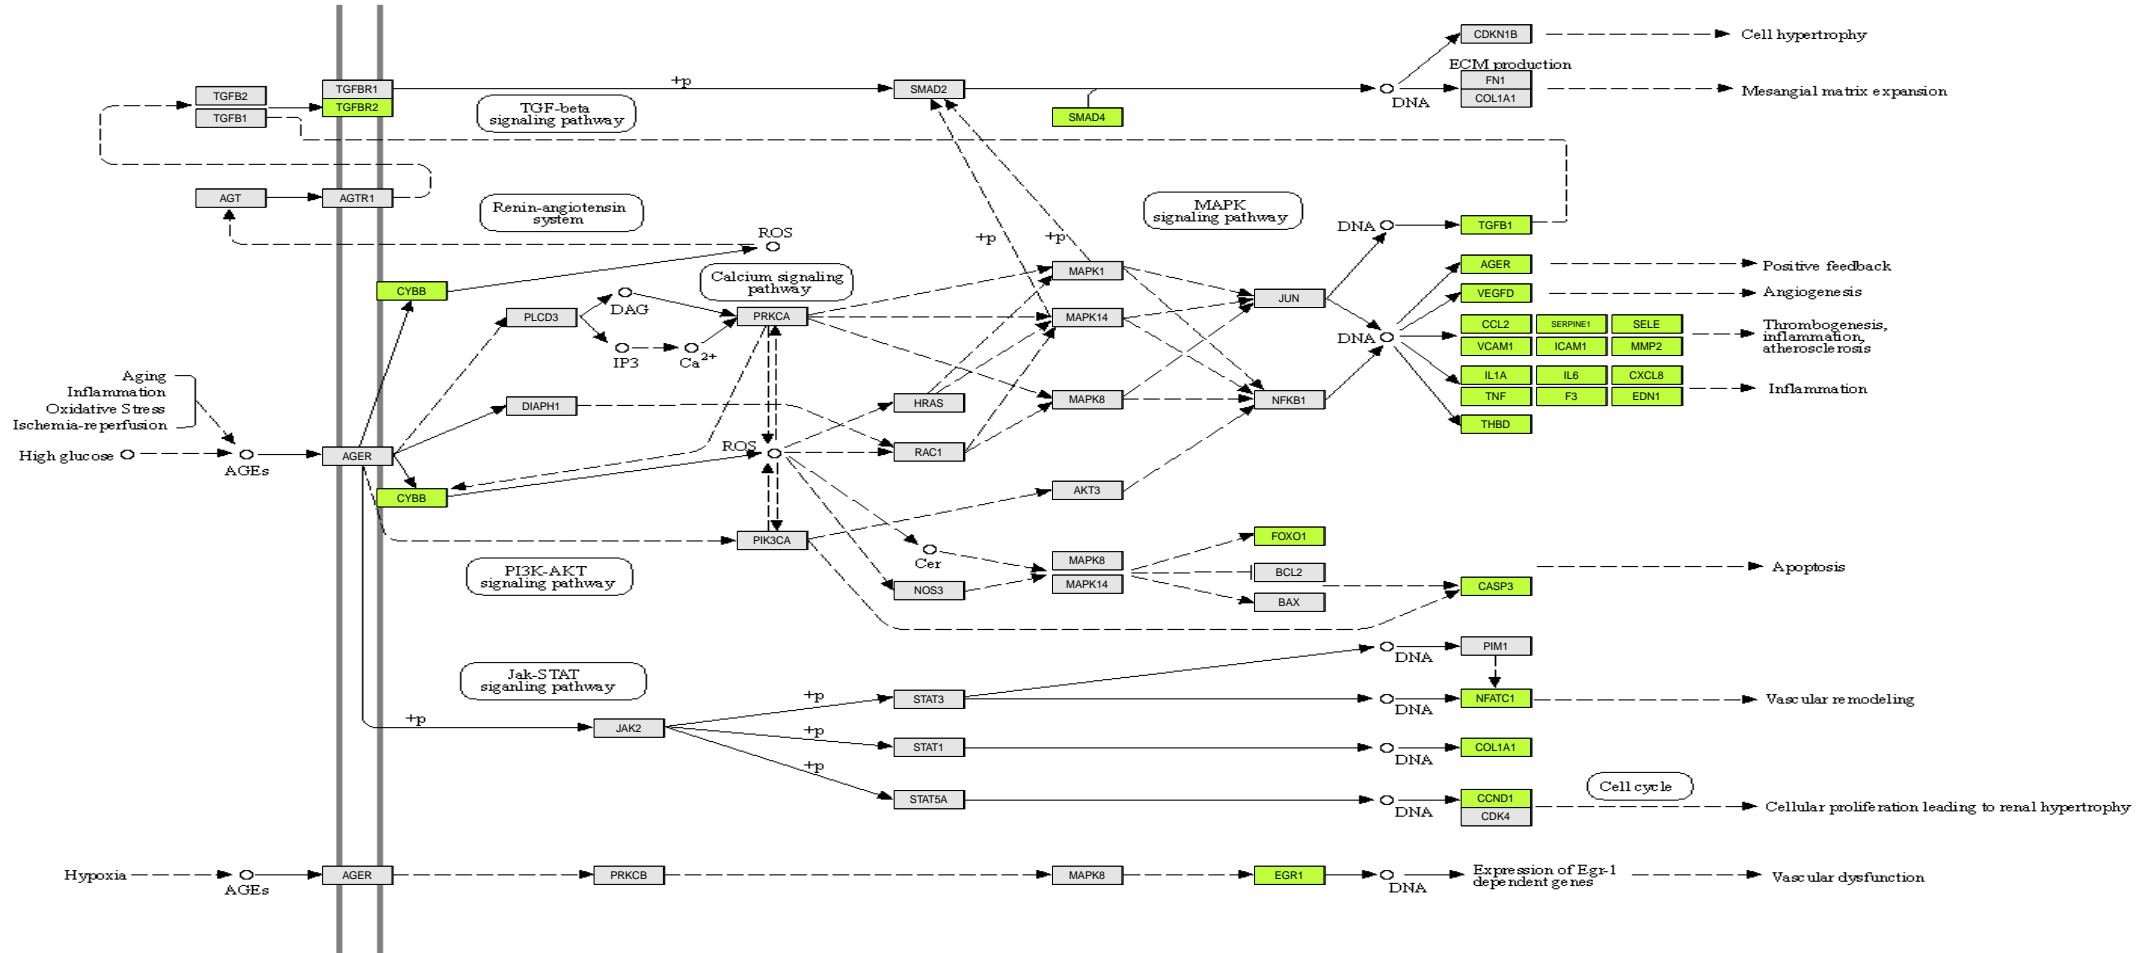

AGE\_RAGE\_signaling\_pathway\_in\_diabetic\_complications  
Newborn

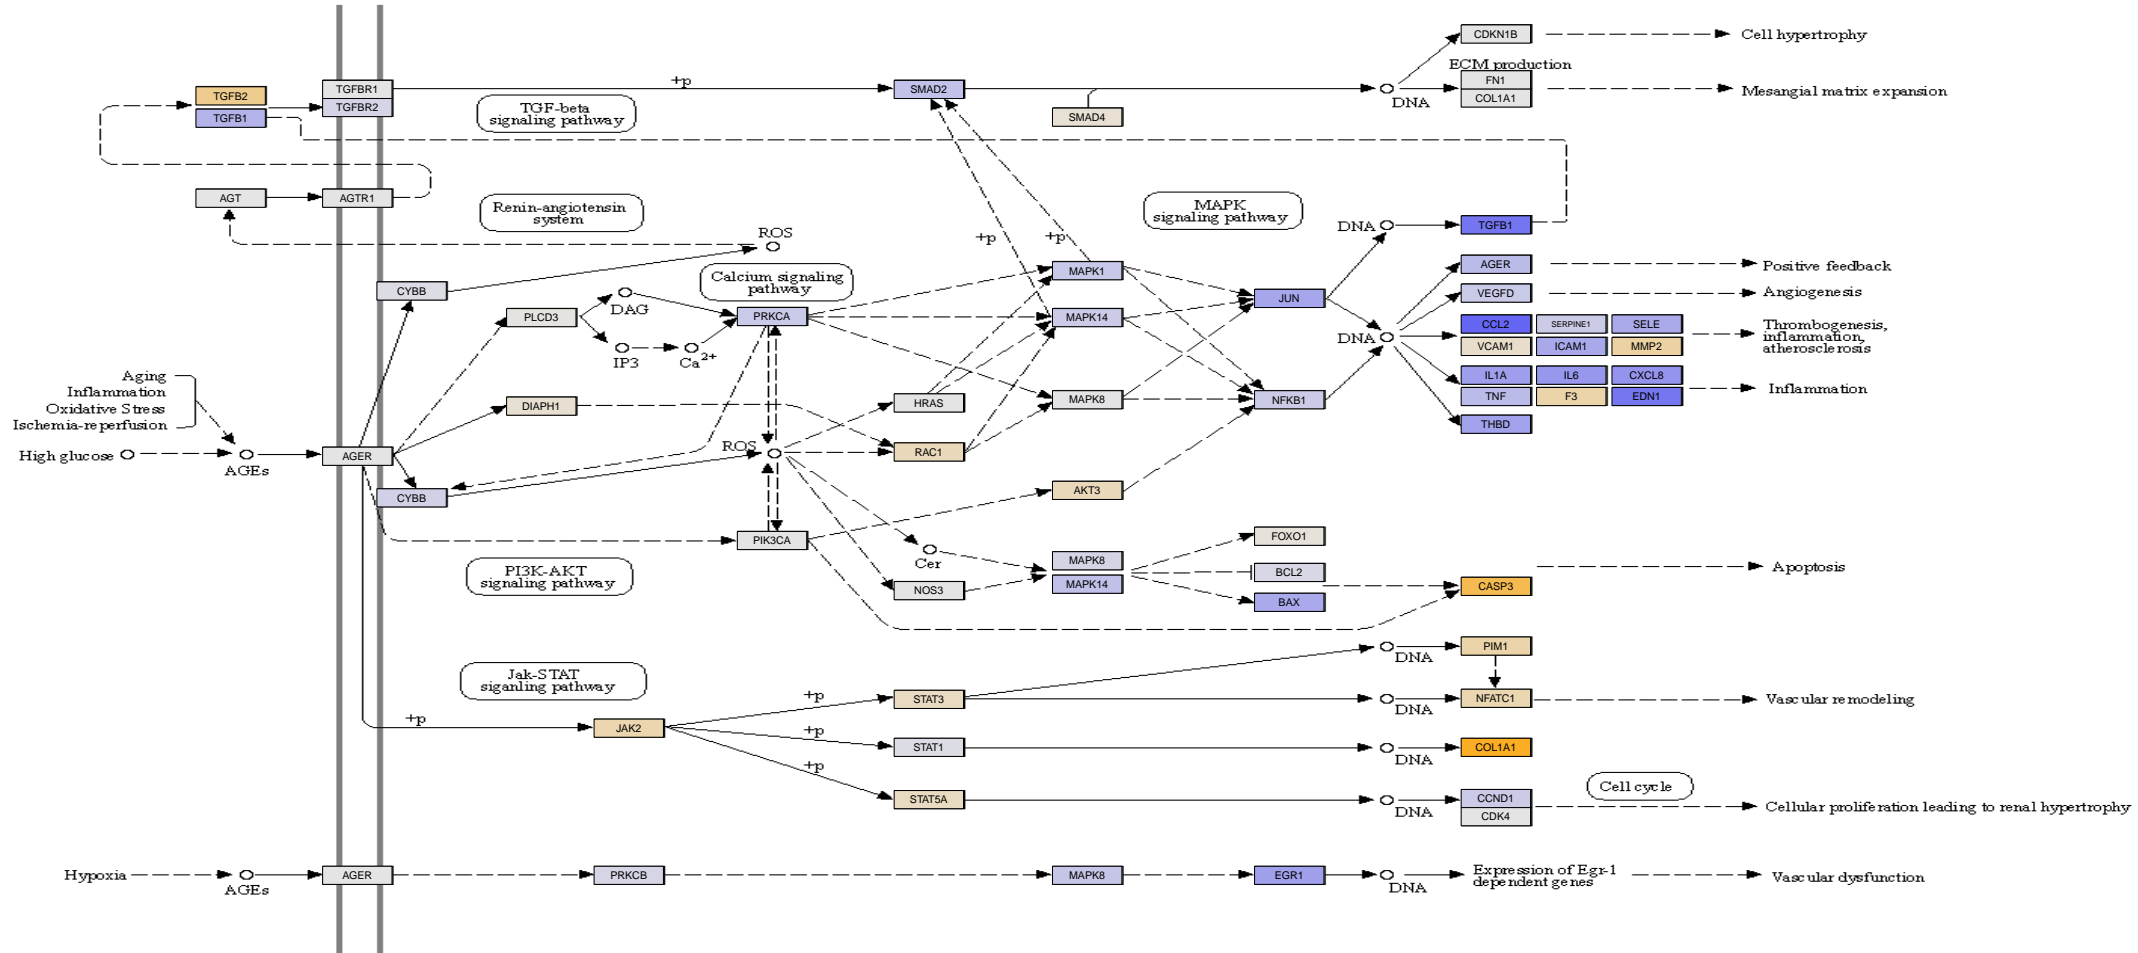

# AGE\_RAGE\_signaling\_pathway\_in\_diabetic\_complications

Baby

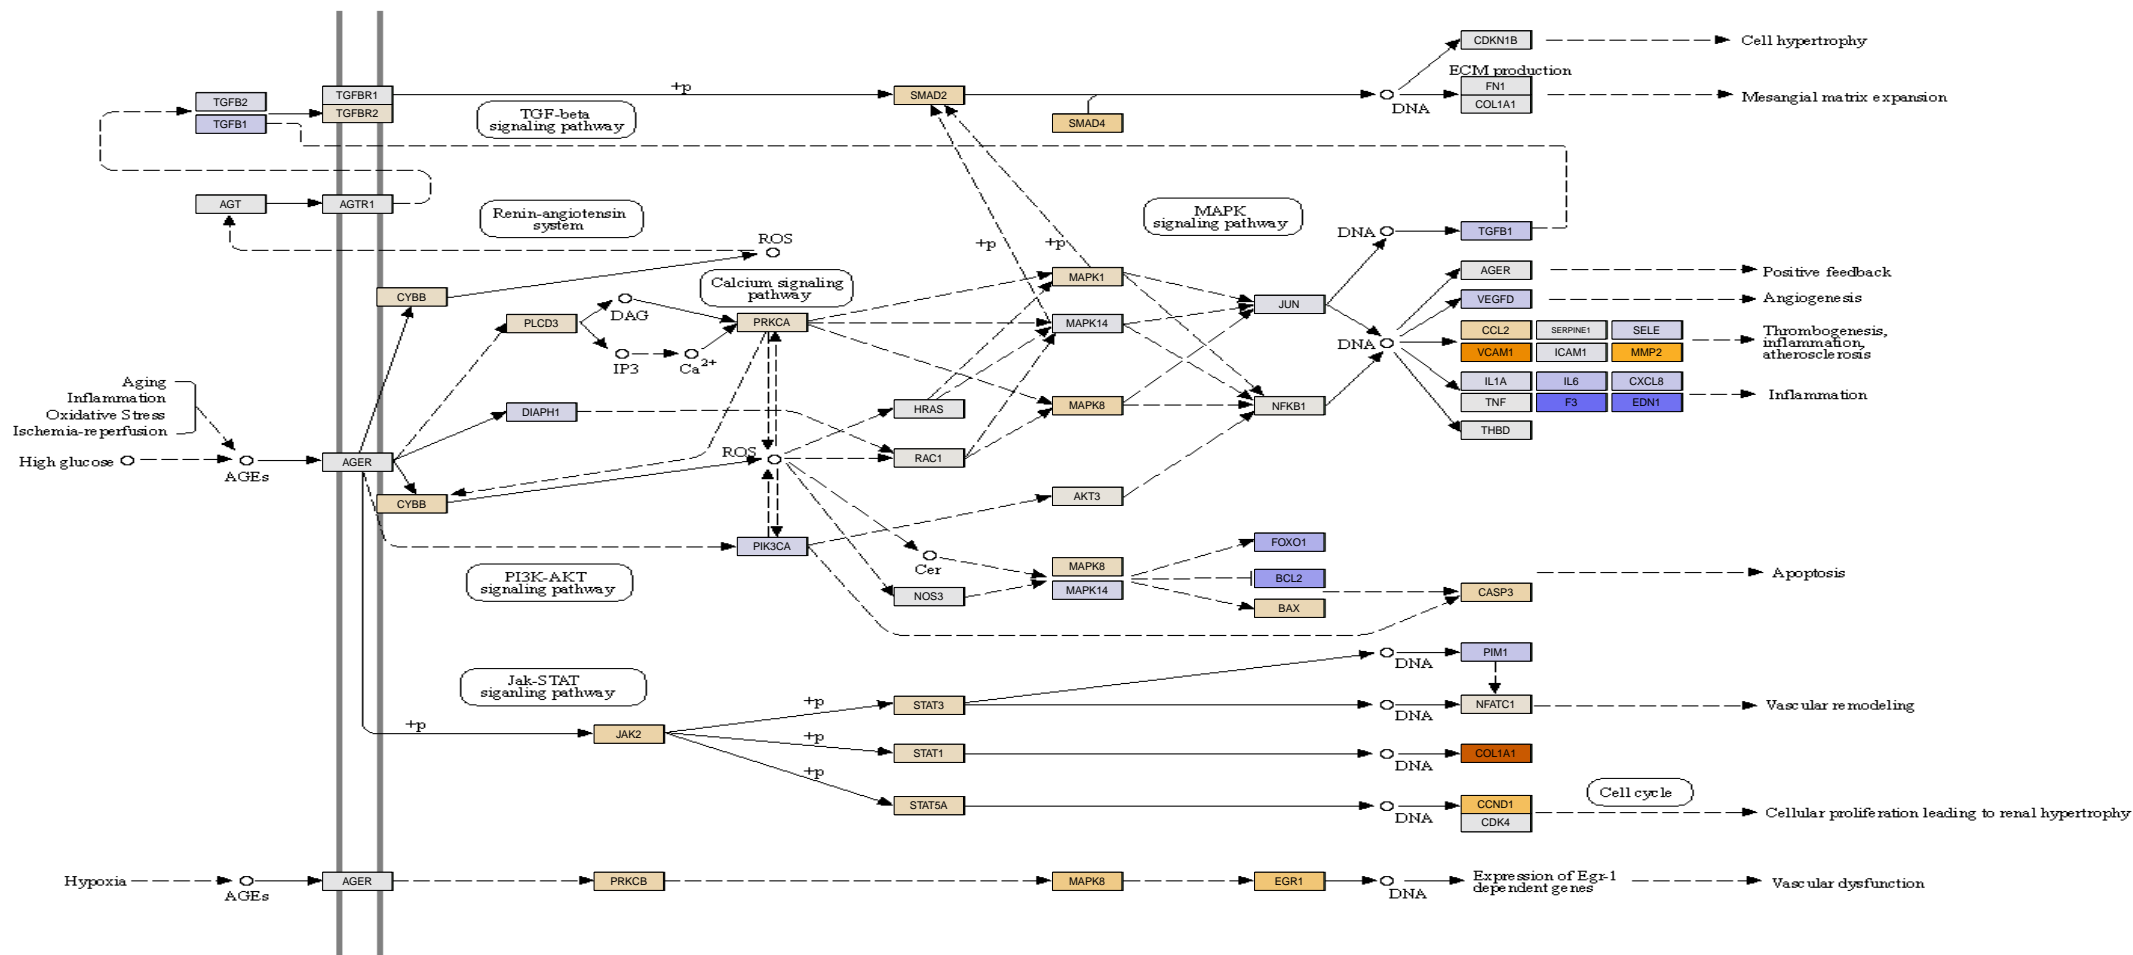



AGE\_RAGE\_signaling\_pathway\_in\_diabetic\_complications  
Teenager

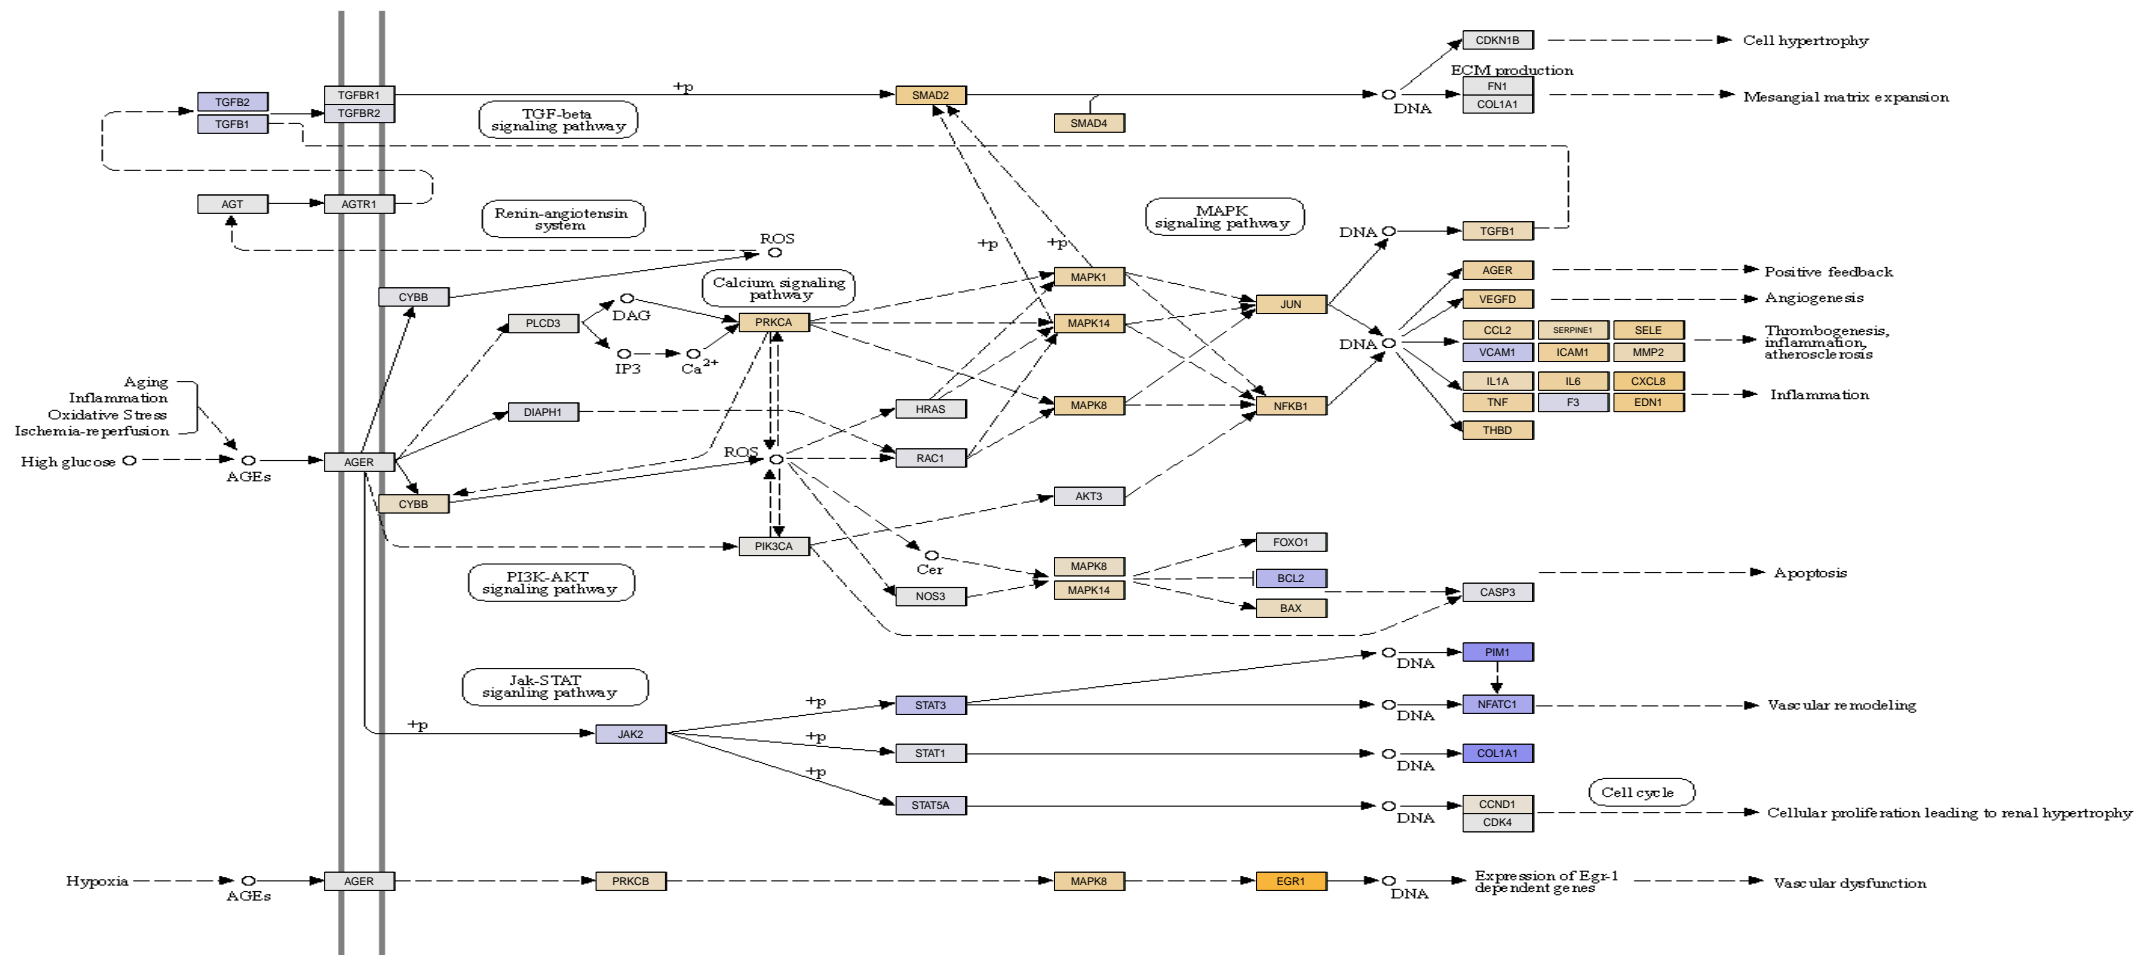

# AGE\_RAGE\_signaling\_pathway\_in\_diabetic\_complications

Adult

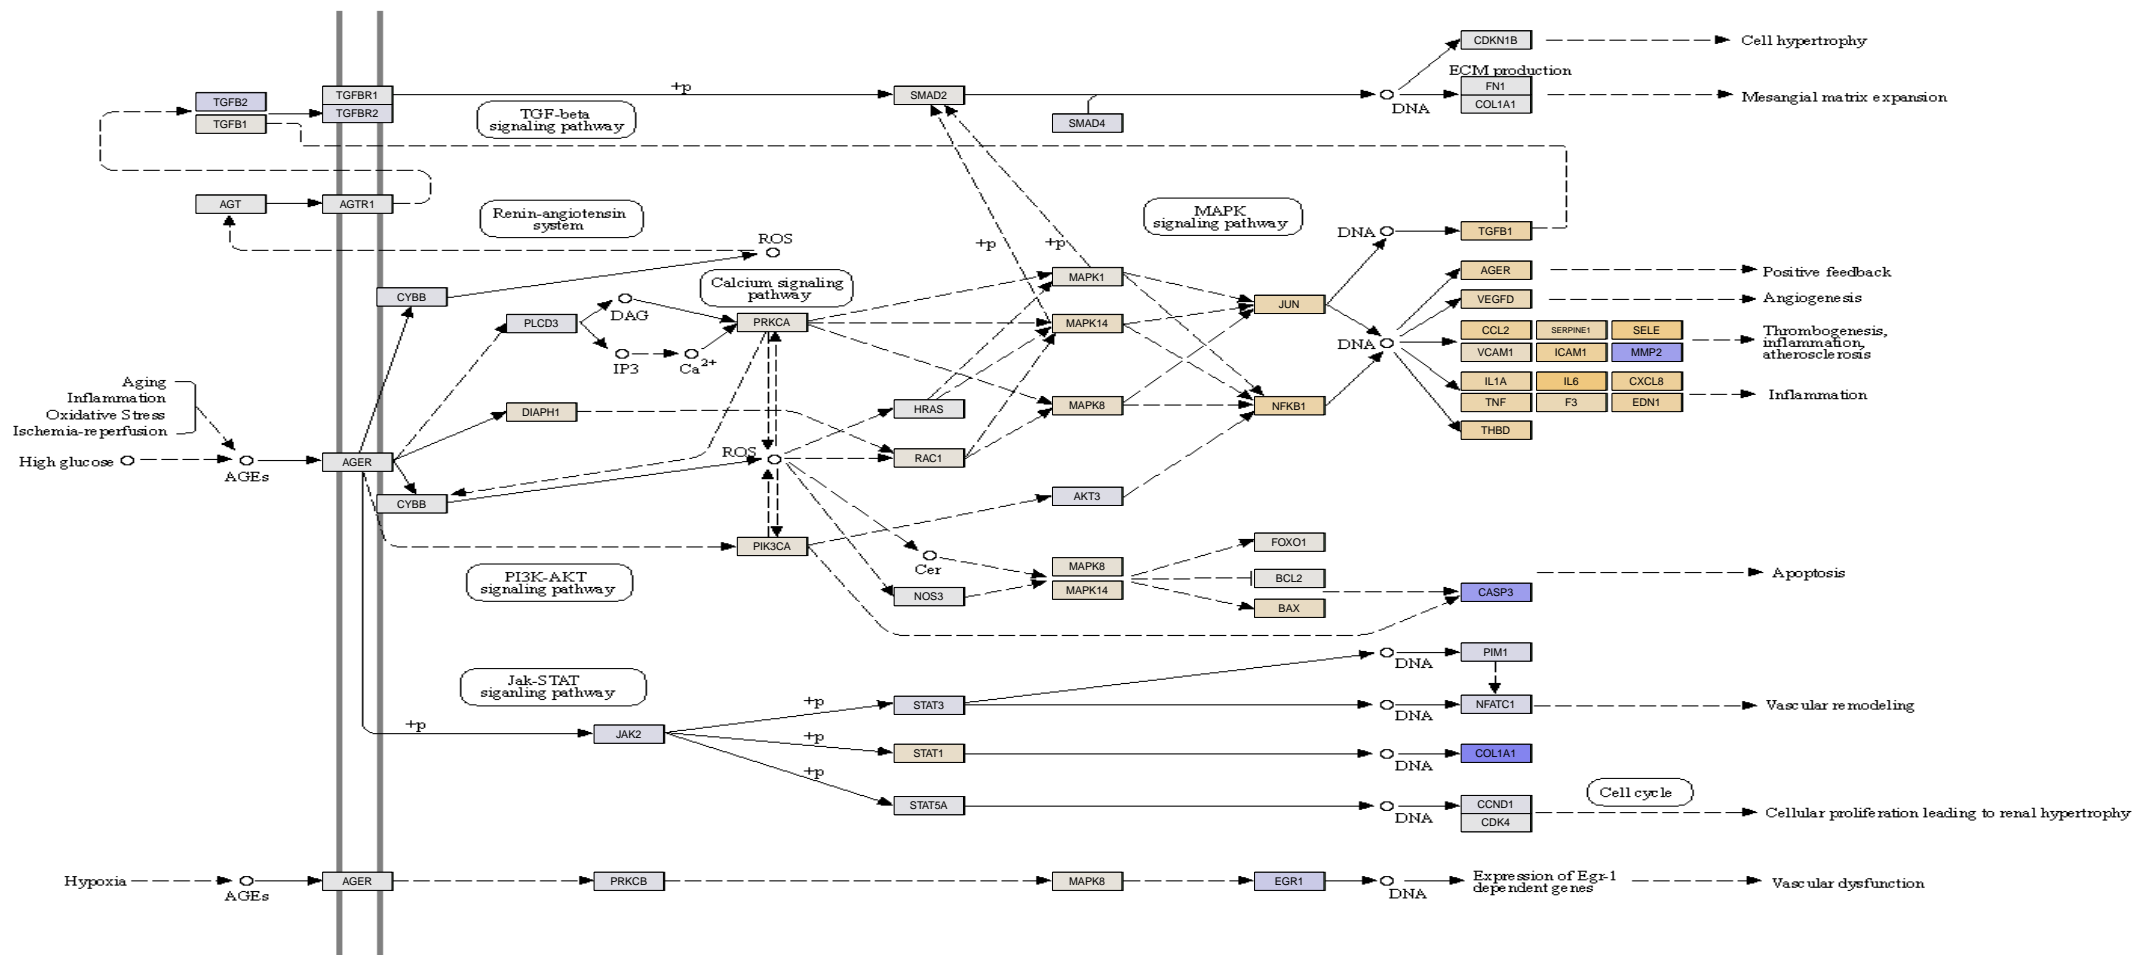



AGE\_RAGE\_signaling\_pathway\_in\_diabetic\_complications  
Late Adult

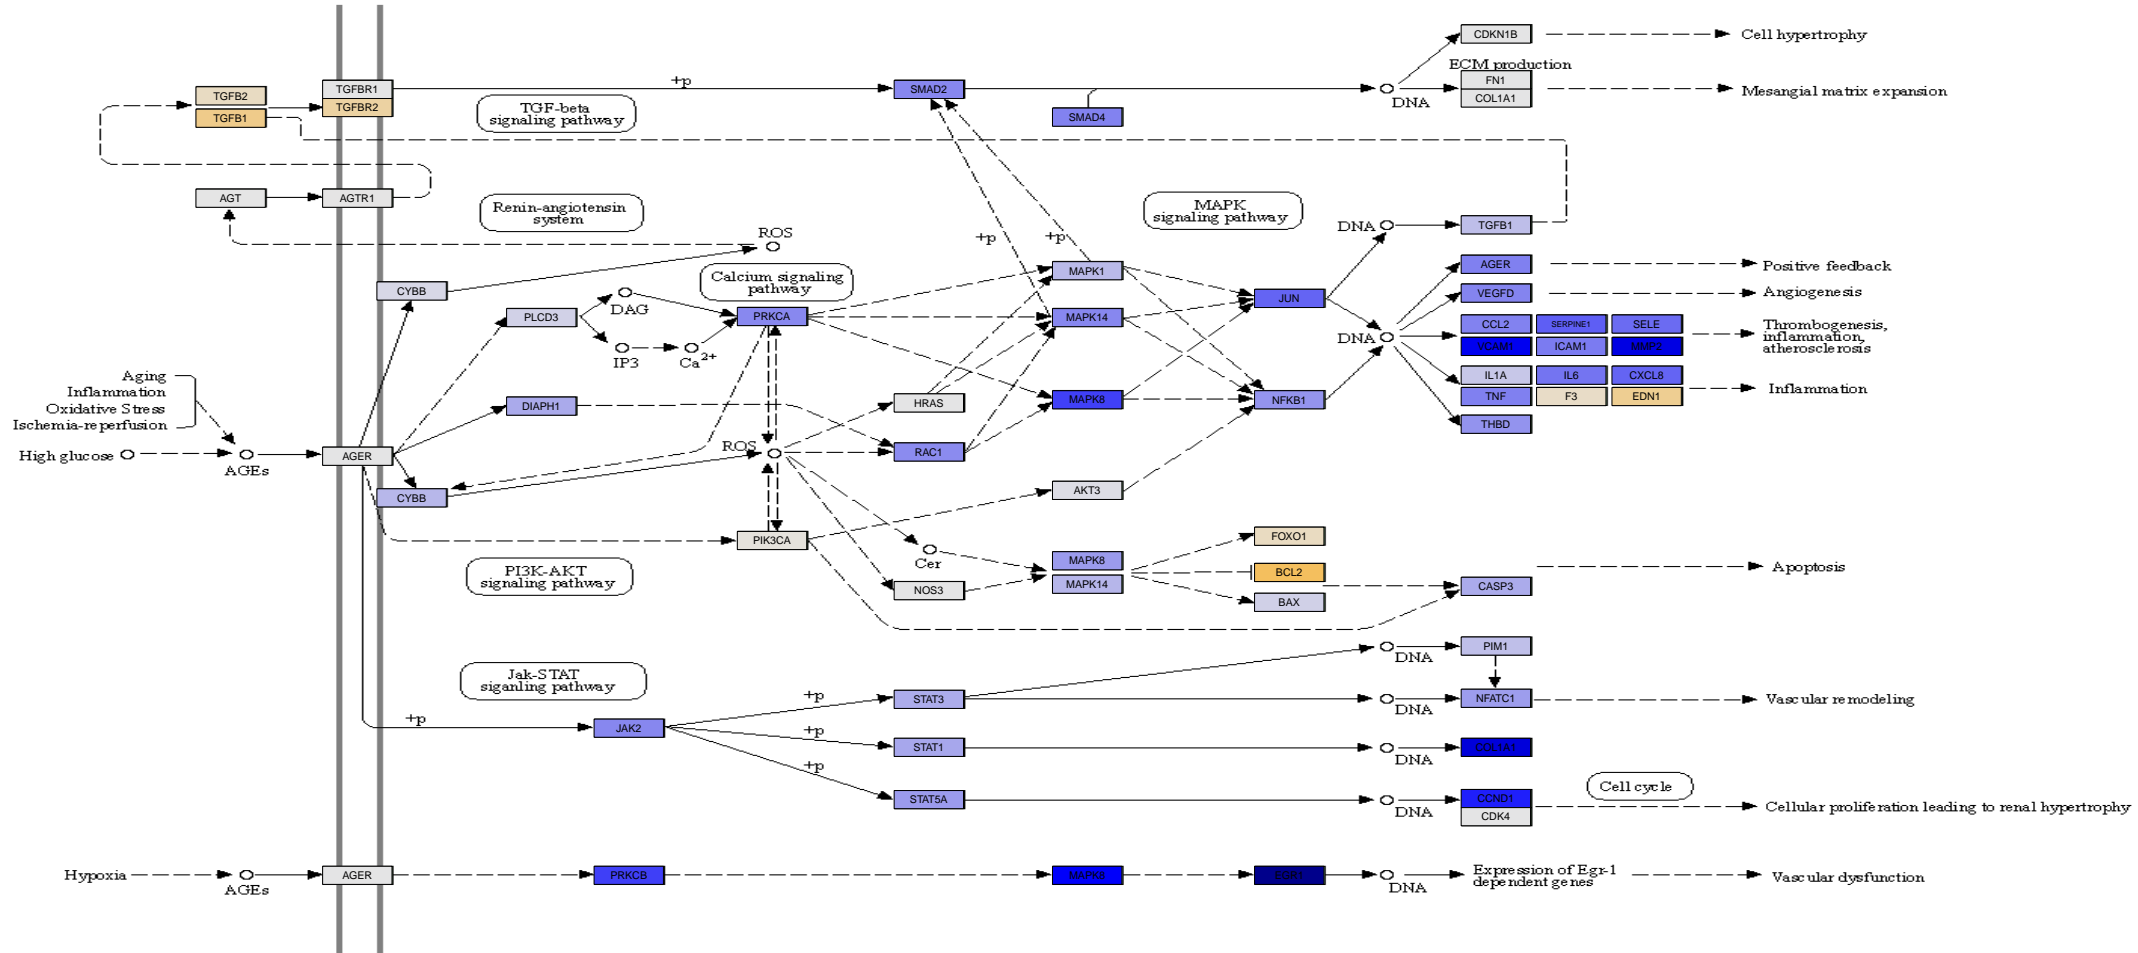

Supplement: s1 [file s1]
