# Supplementary material for: The Transcriptome and Methylome of the Developing and Aging Brain and Their Relations to Gliomas and Psychological Disorders
Source: MDPI journal article supplement (doi:10.3390/cells11030362), 2022-01-21

Oxytocin signaling pathway

all genes

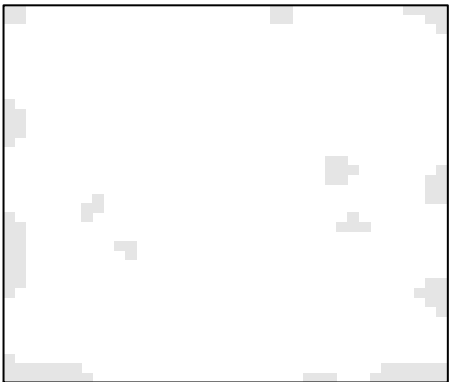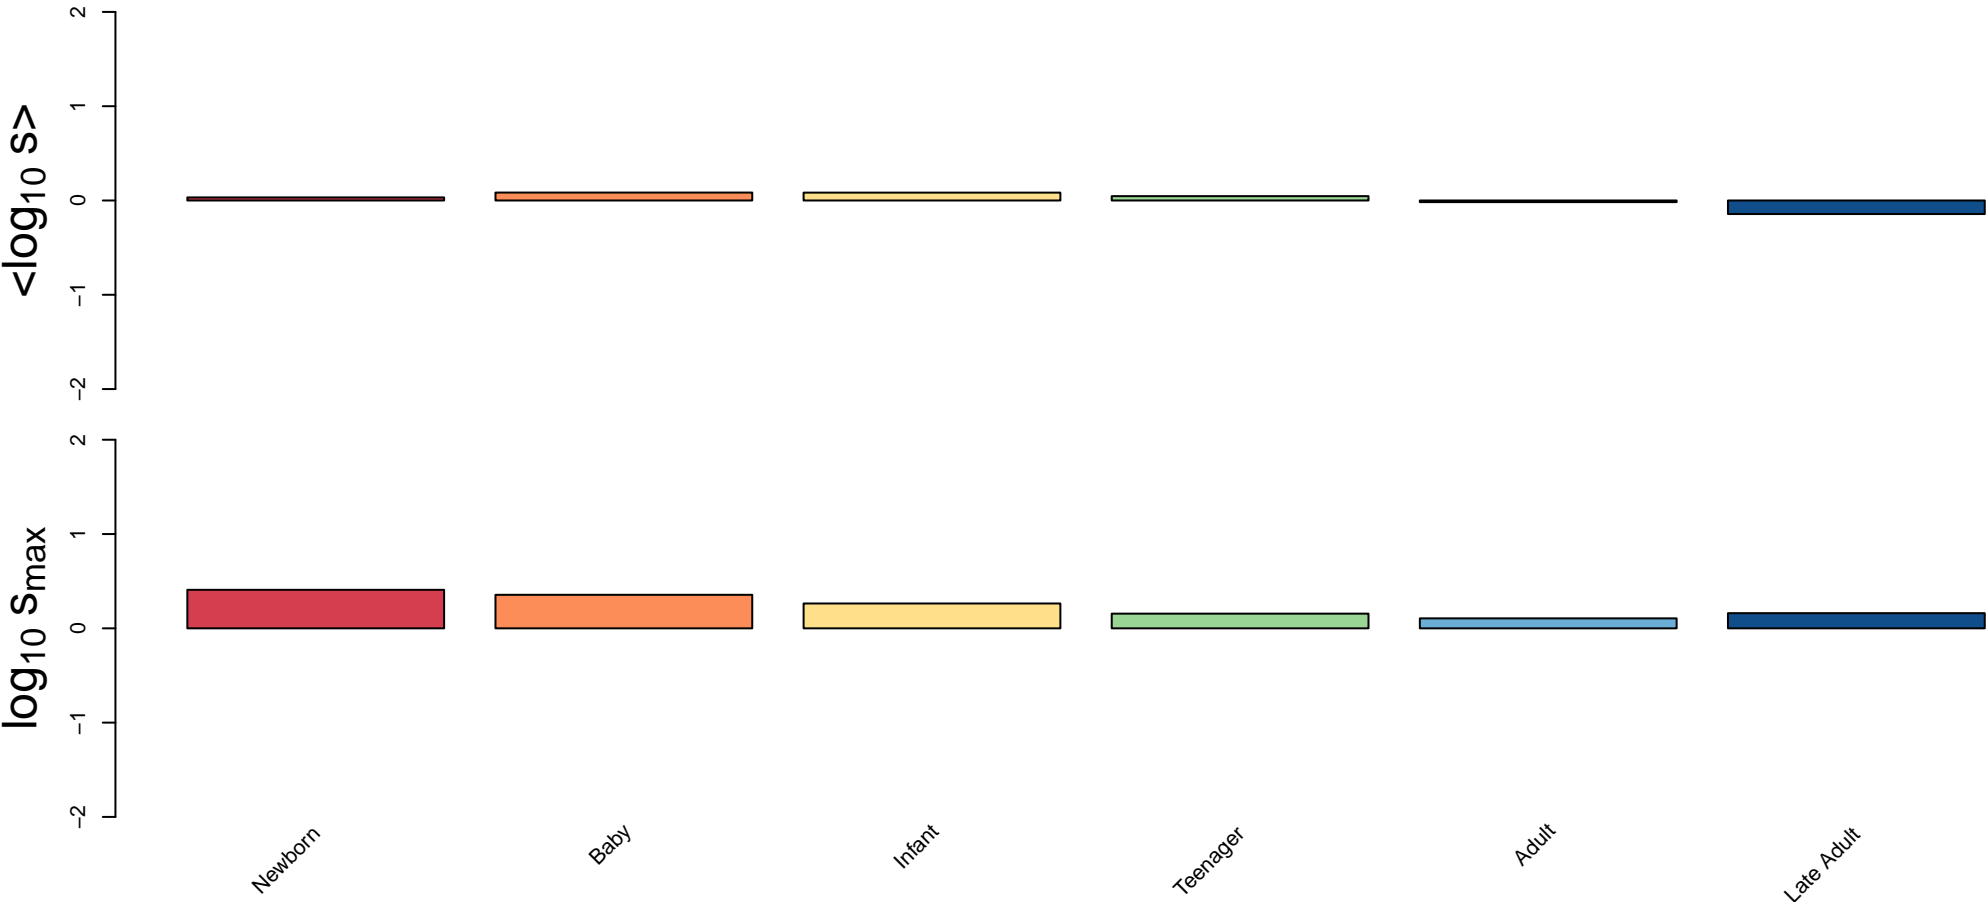

Oxytocin signaling pathway  
genes with data

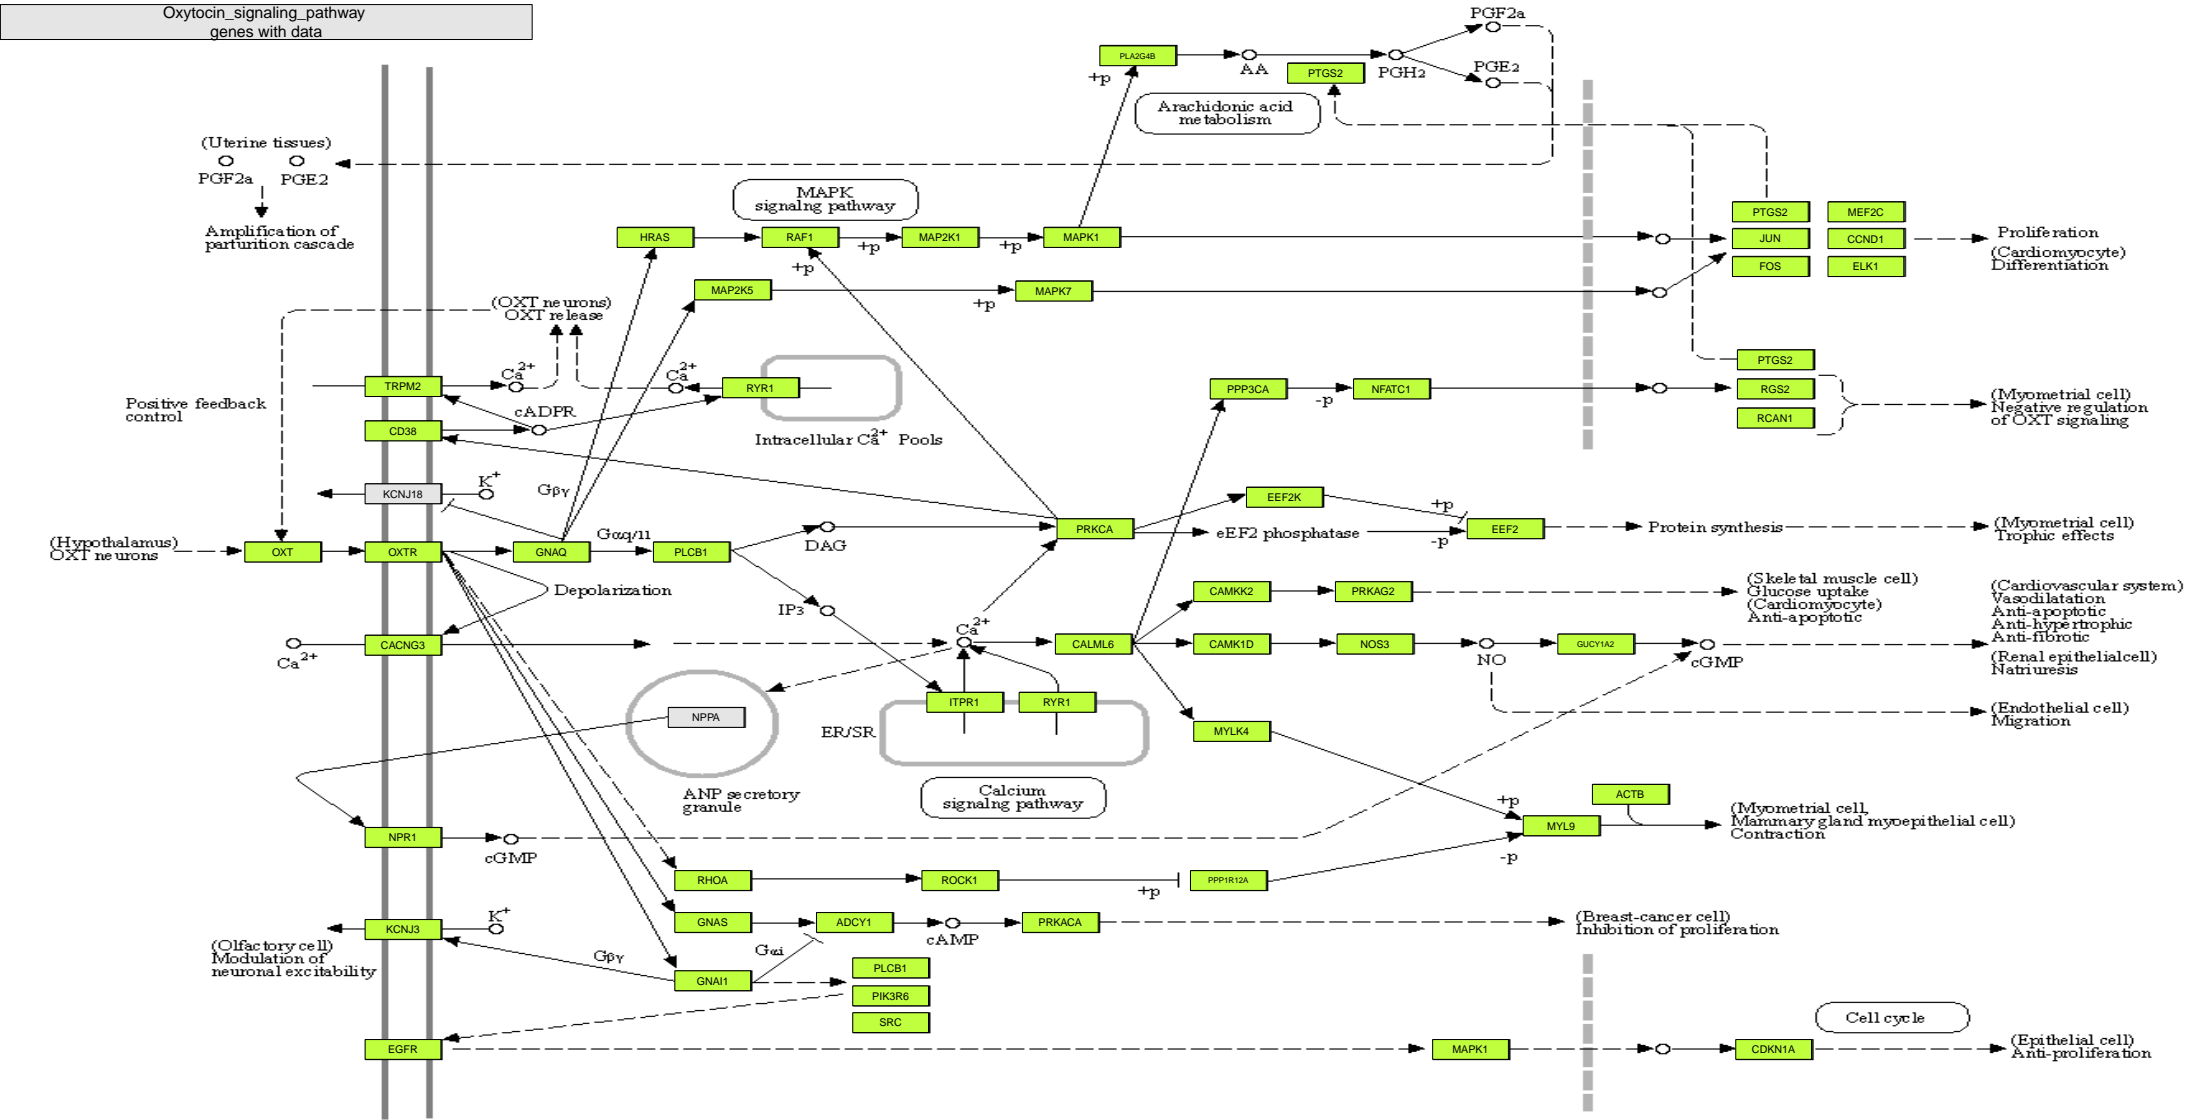

Oxytocin signaling pathway  
sink nodes

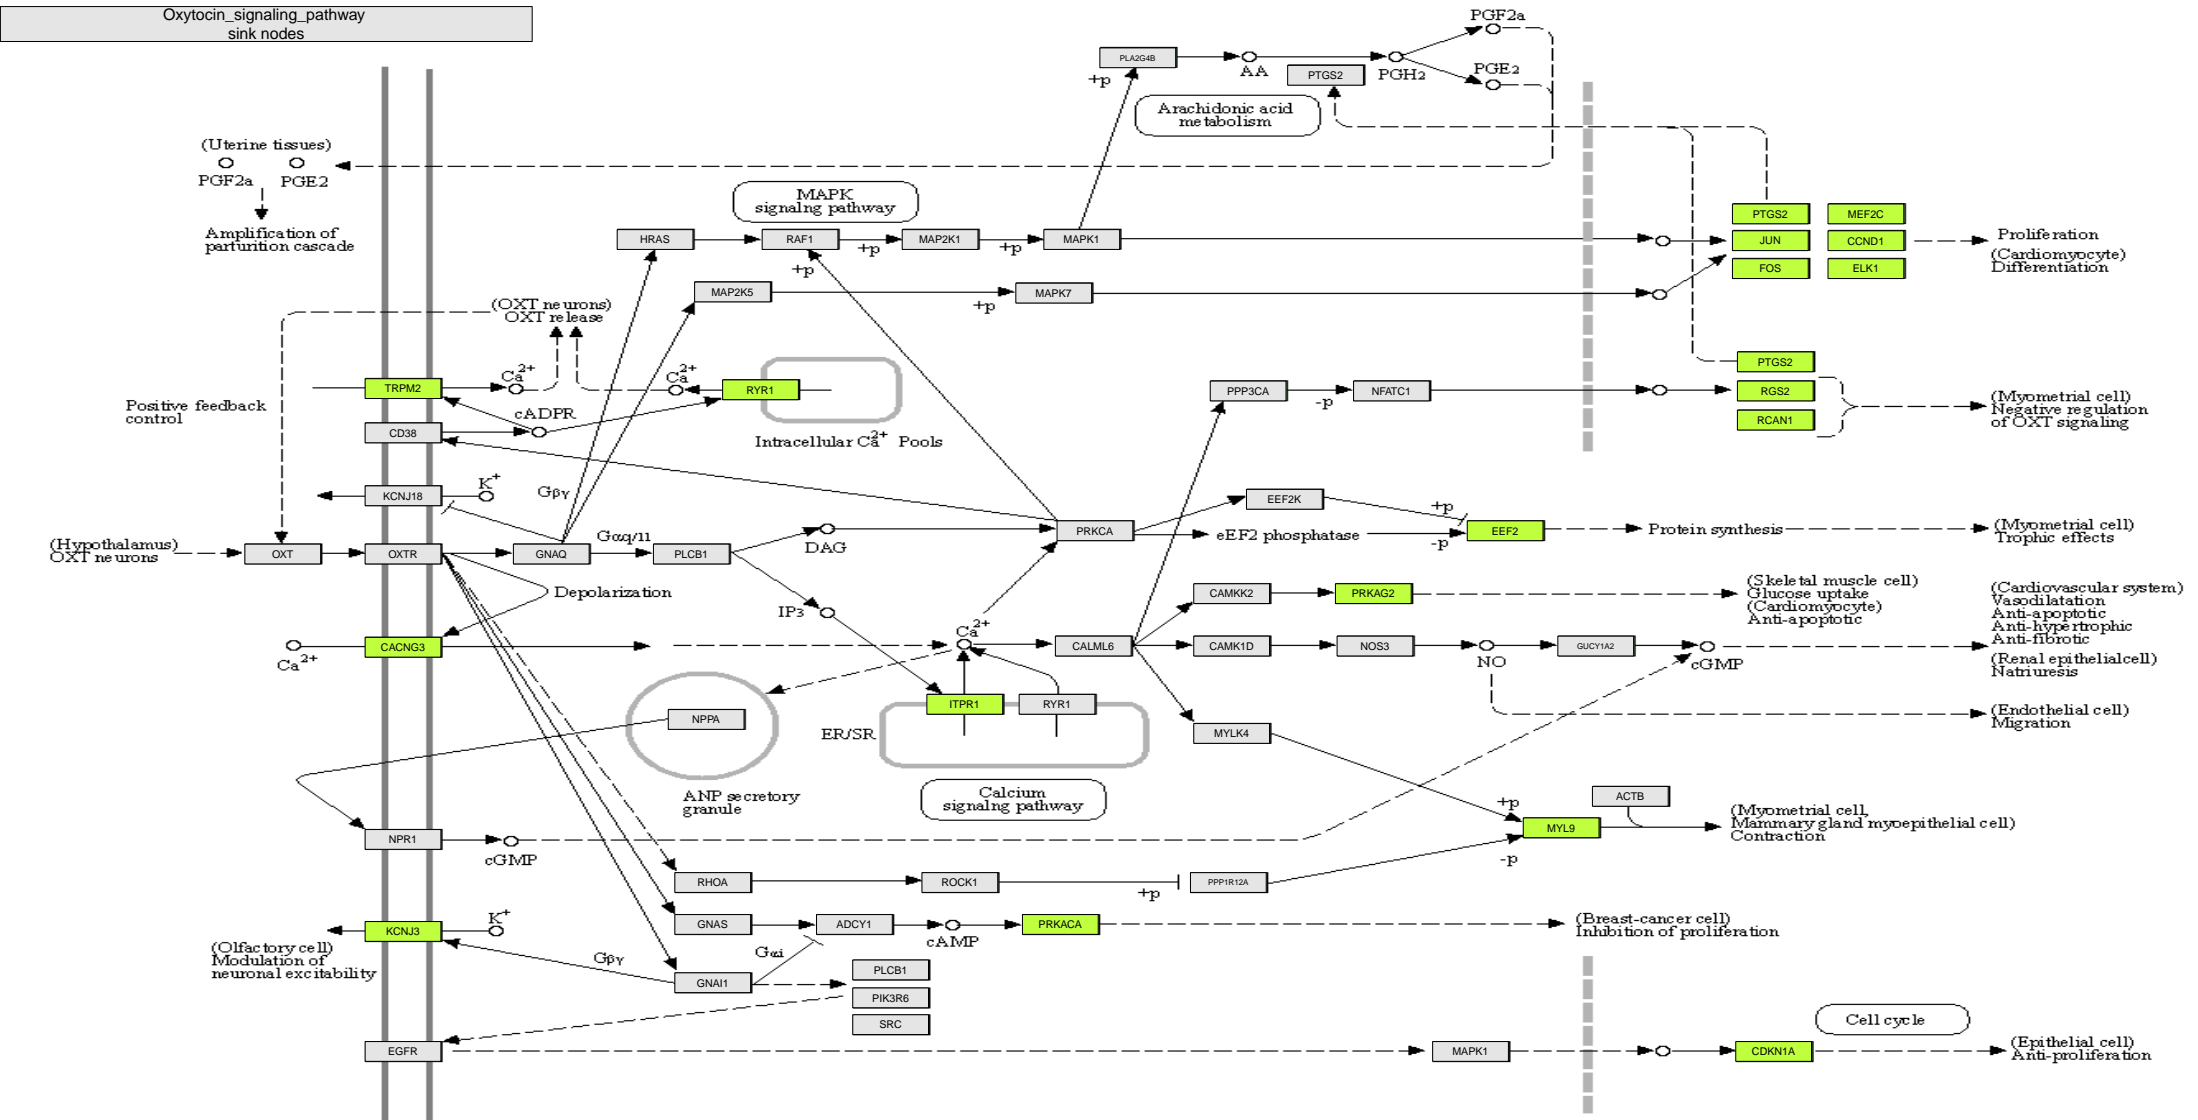



Oxytocin signaling pathway  
Baby

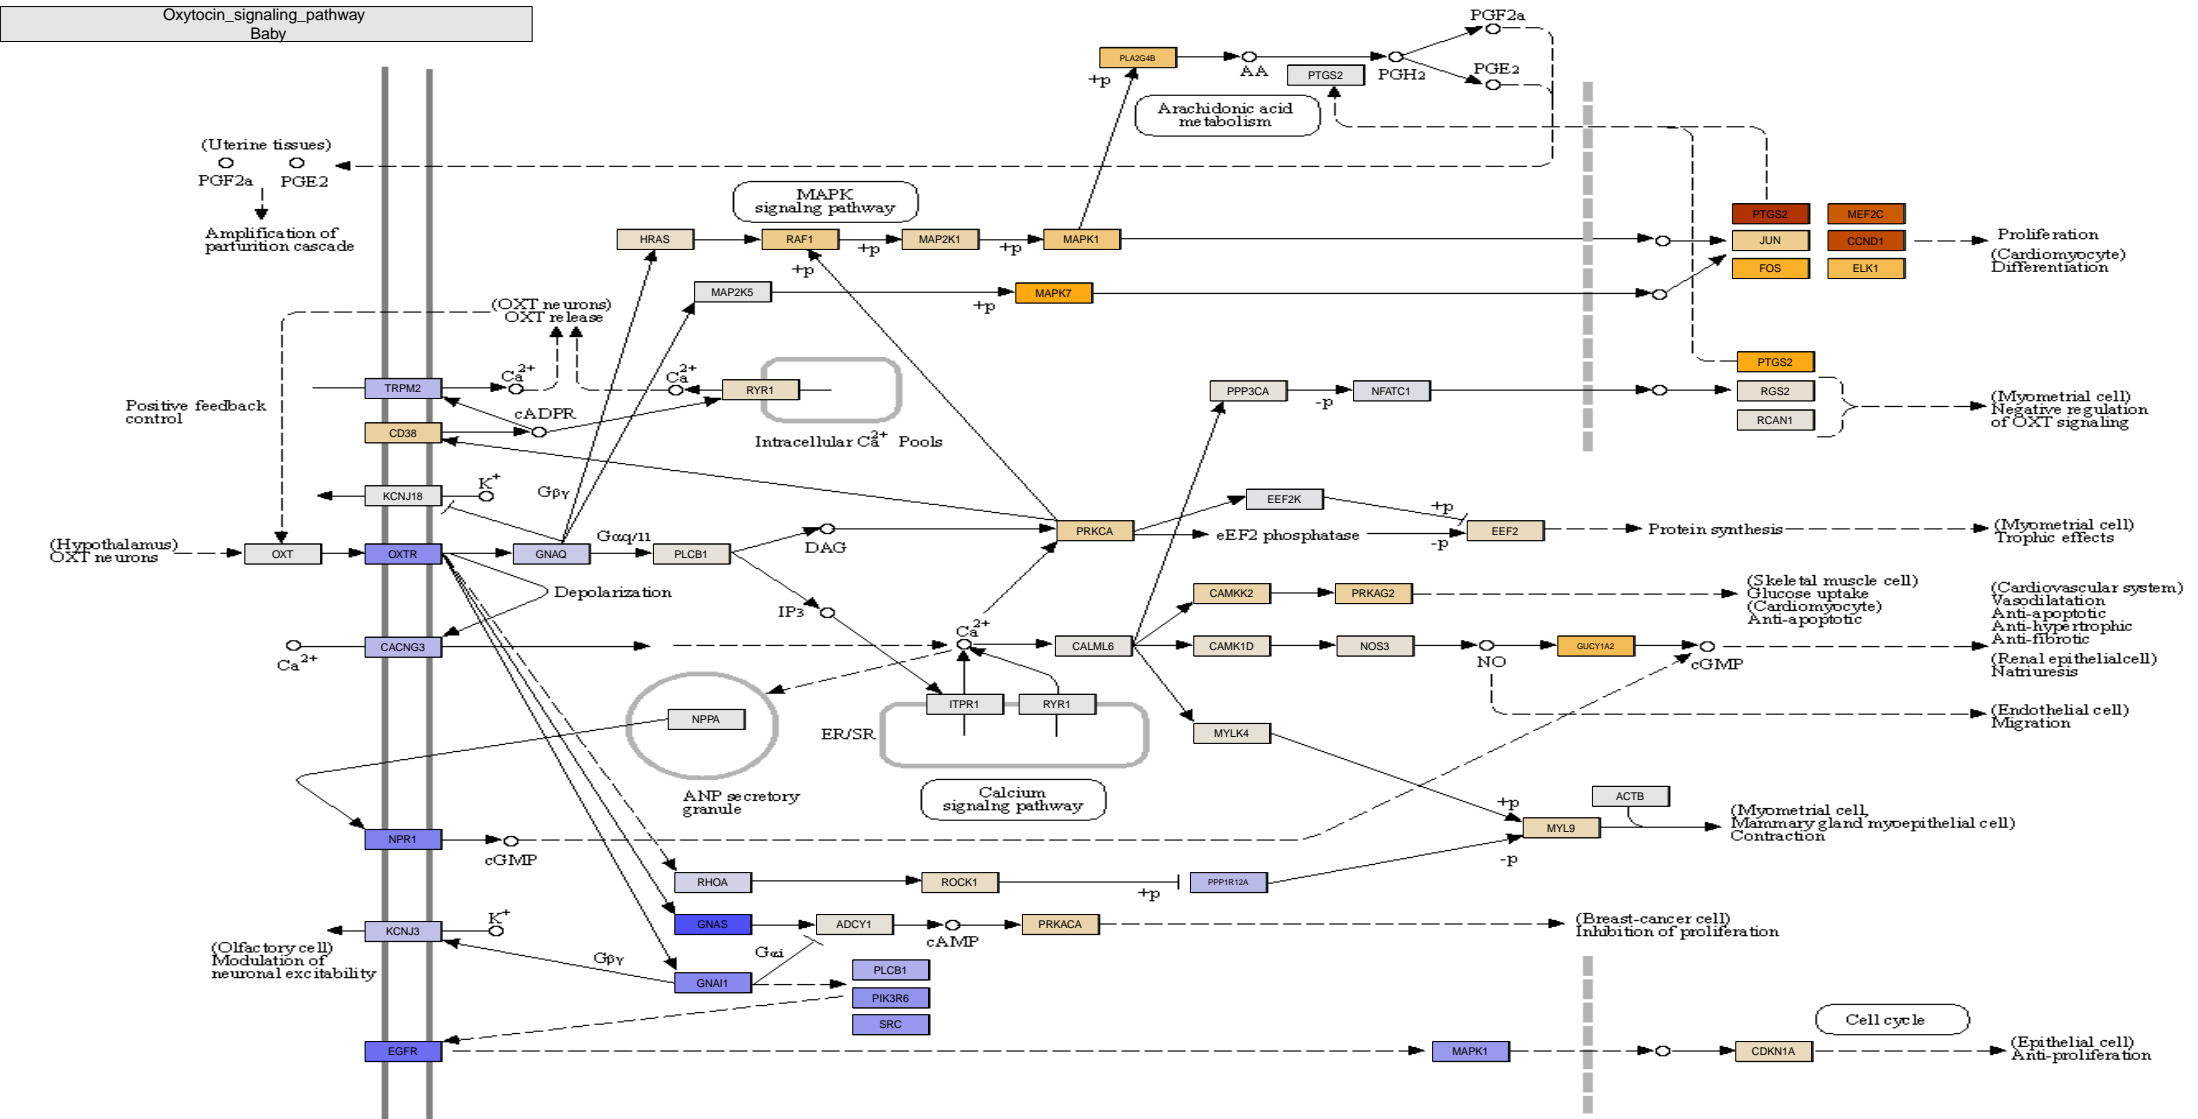



Oxytocin signaling pathway  
Teenager

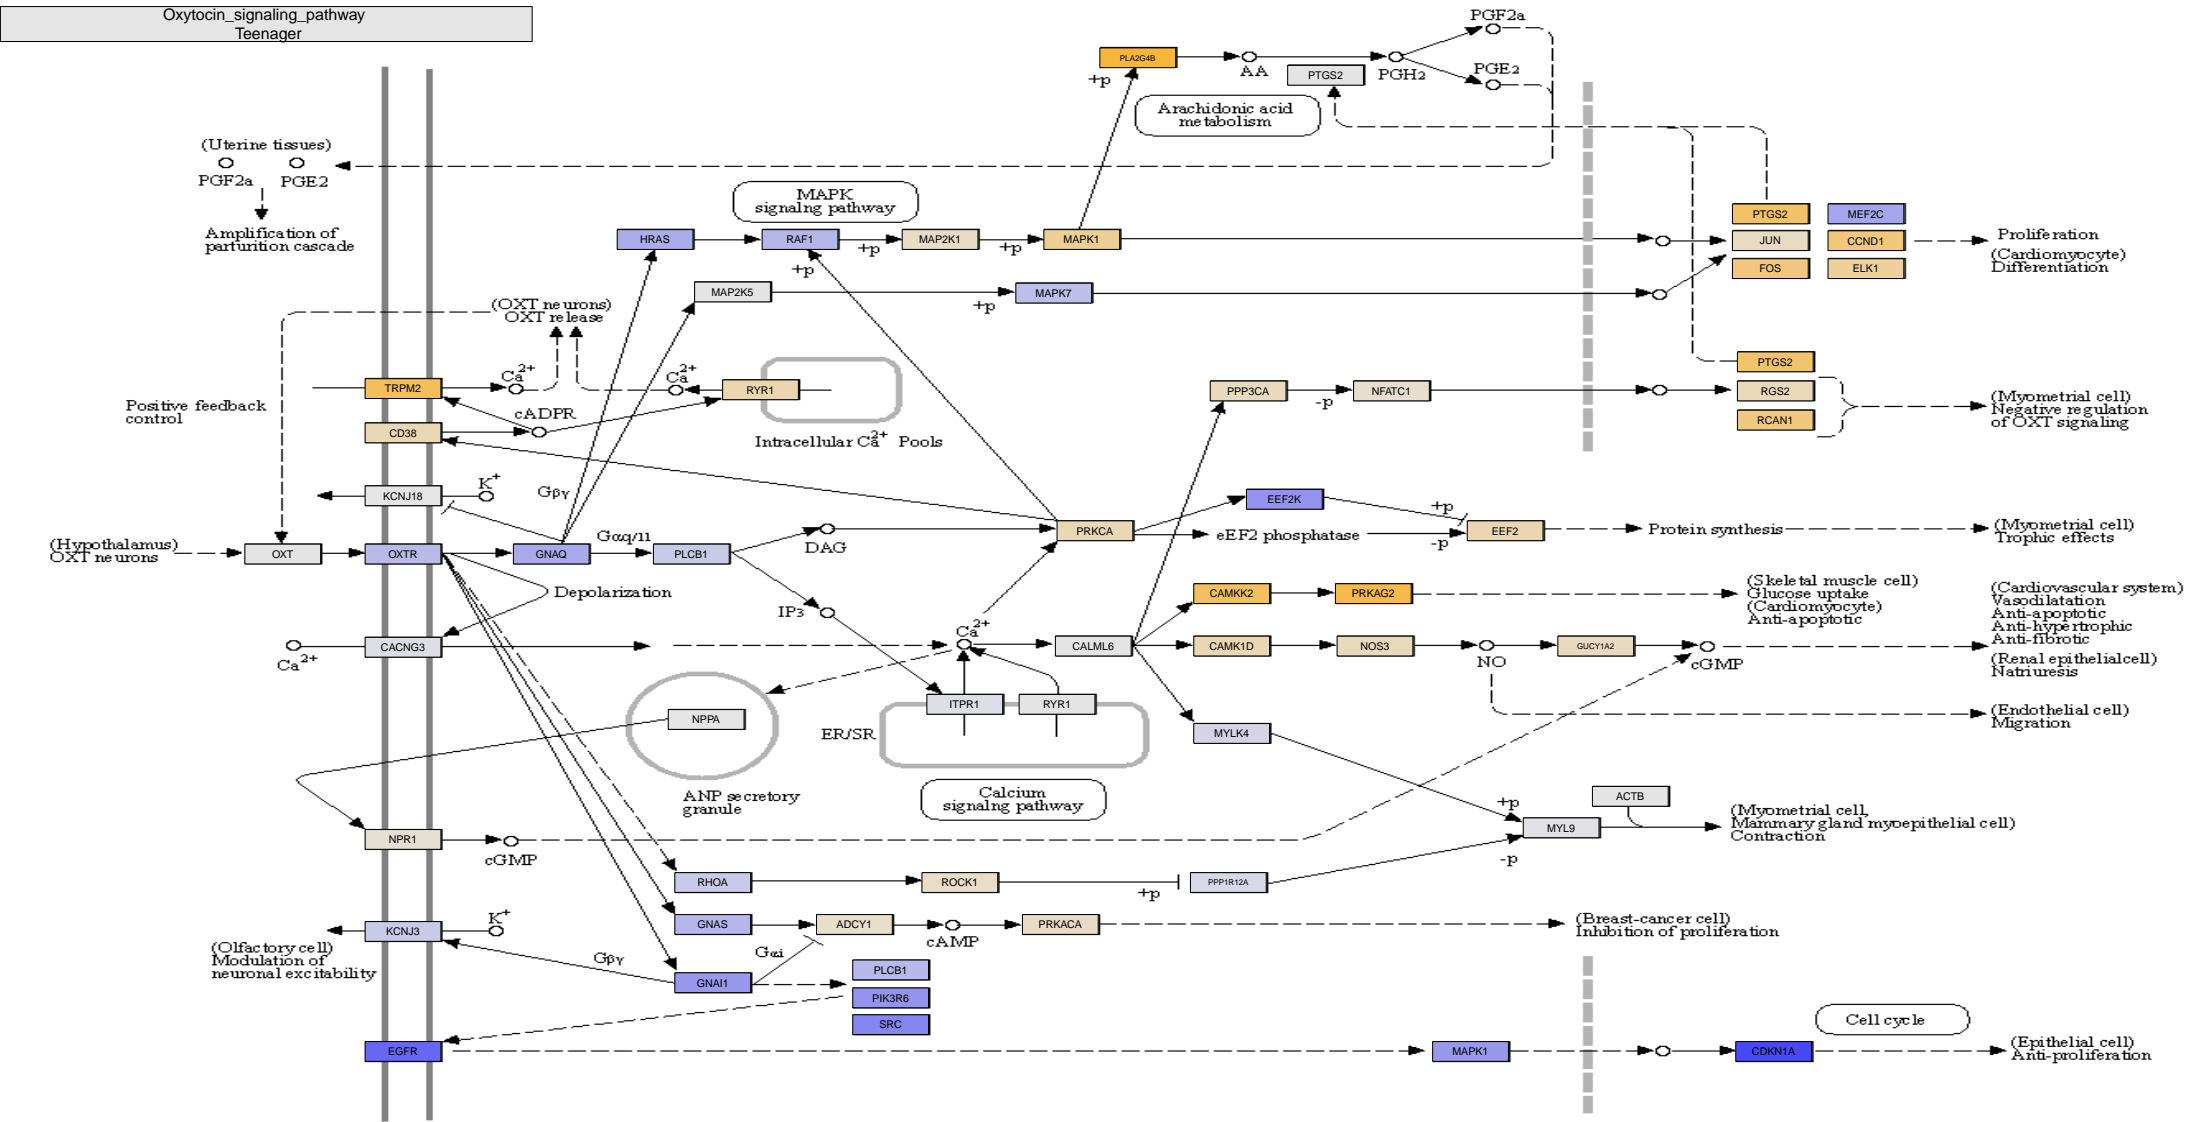

Oxytocin signaling pathway  
Adult

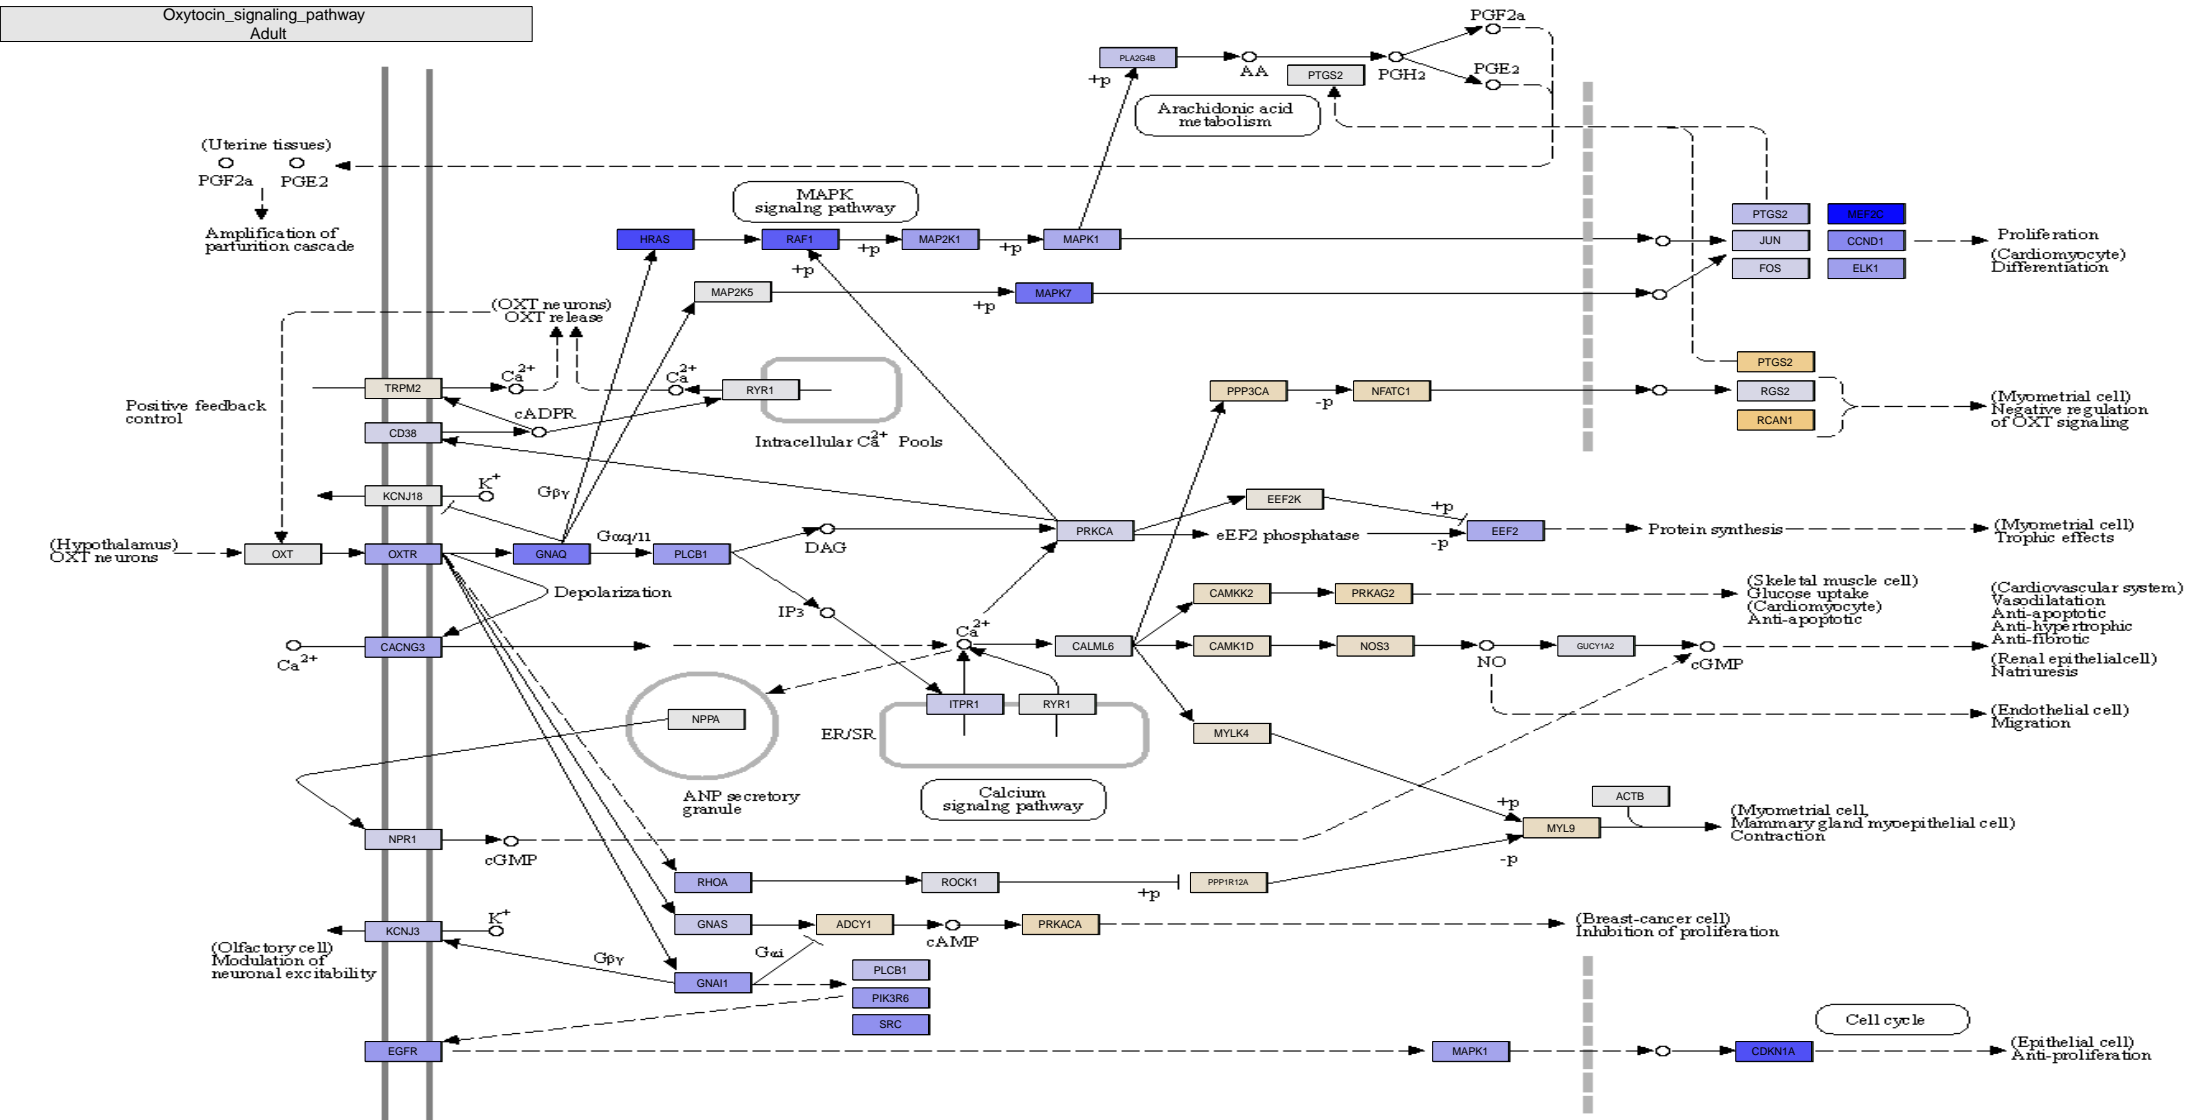



Oxytocin signaling pathway  
Late Adult

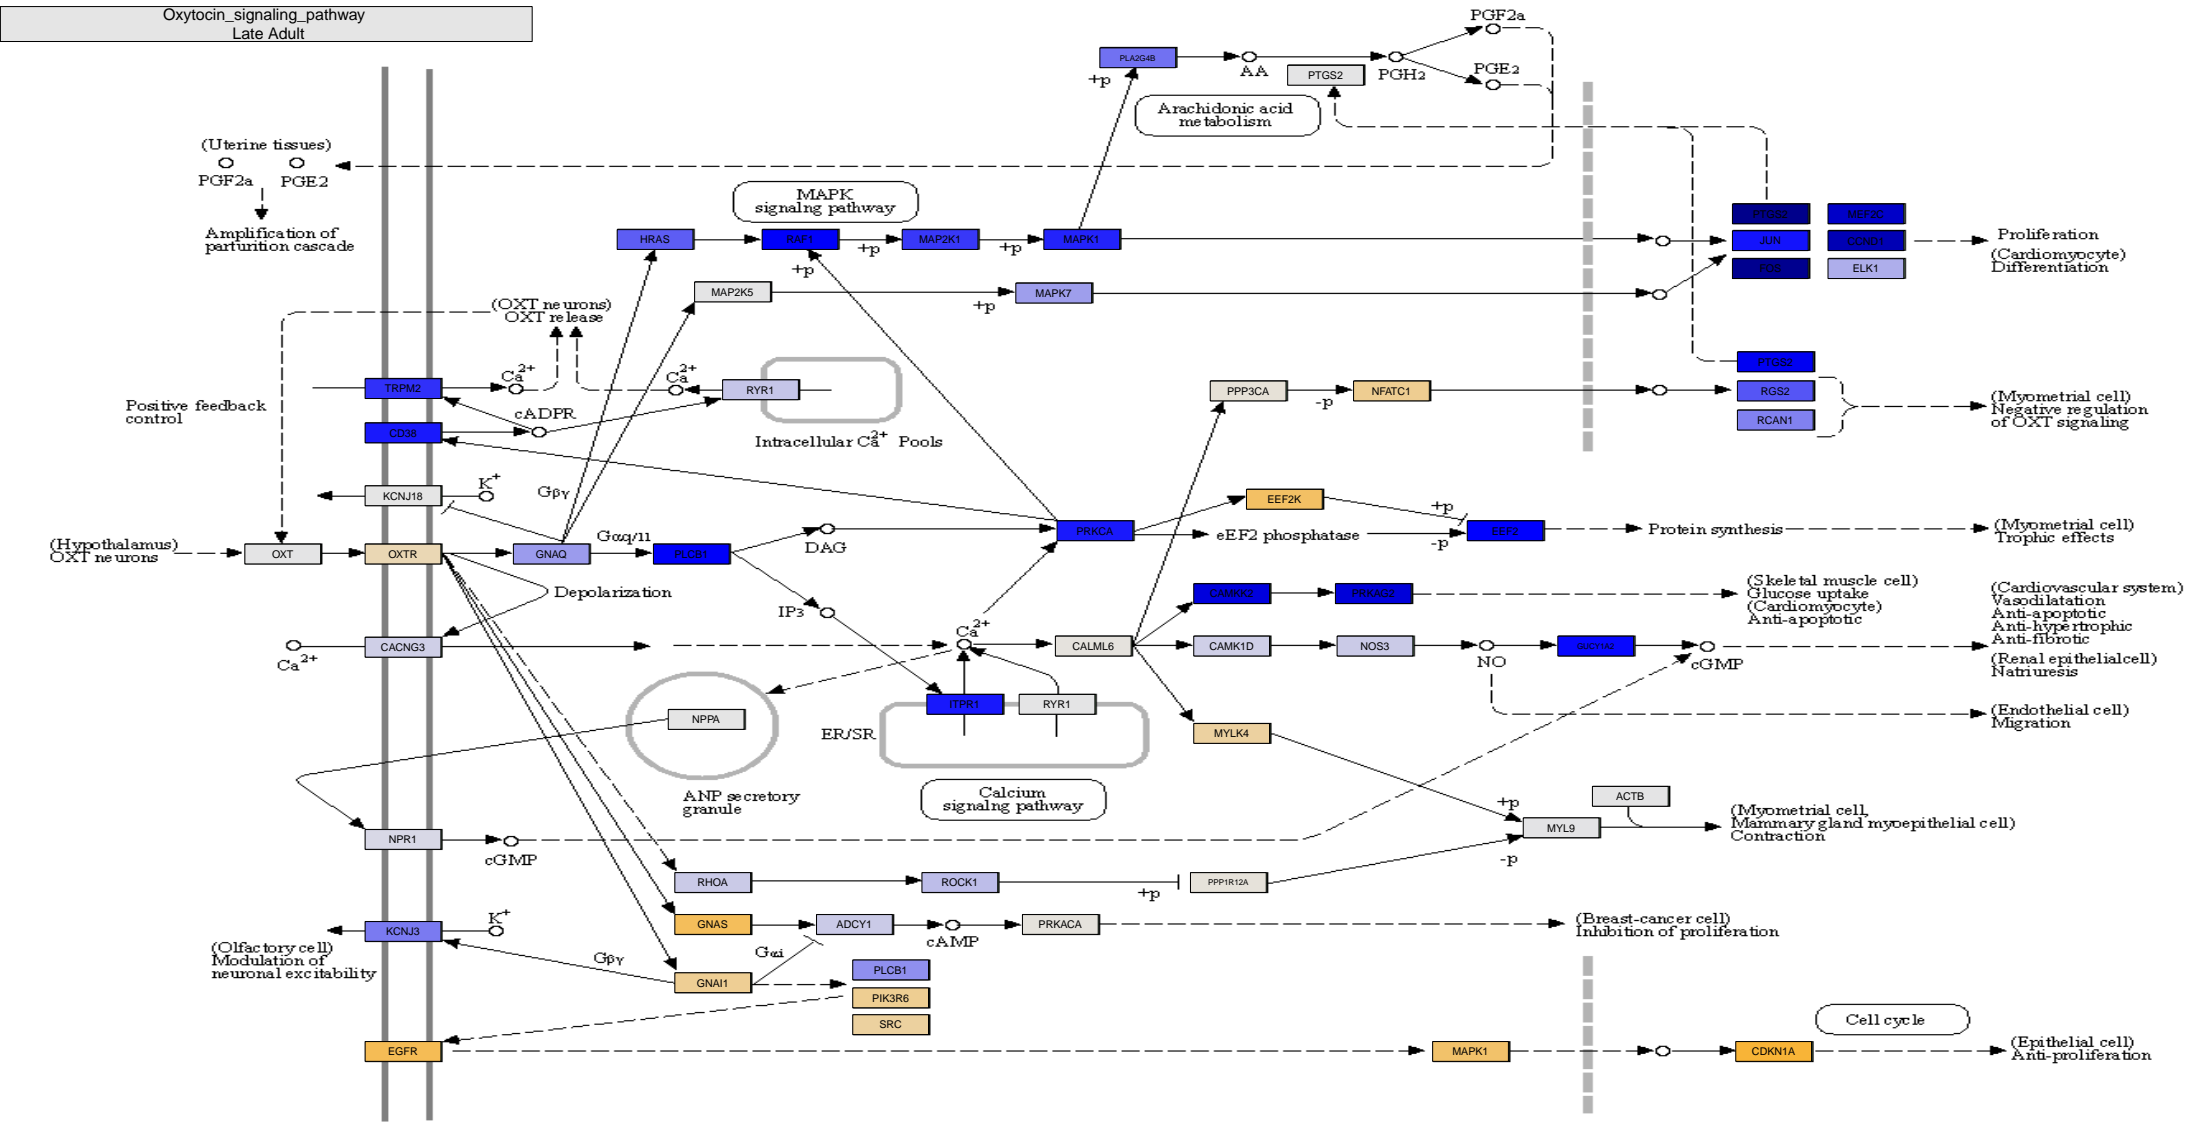

Supplement: s1 [file s1]
