# Supplementary material for: The Transcriptome and Methylome of the Developing and Aging Brain and Their Relations to Gliomas and Psychological Disorders
Source: MDPI journal article supplement (doi:10.3390/cells11030362), 2022-01-21

Rap1 signaling pathway

all genes

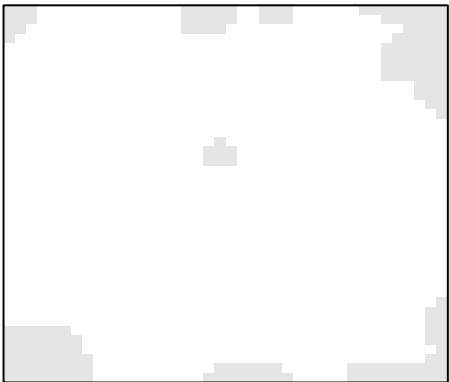

maximum = -Inf

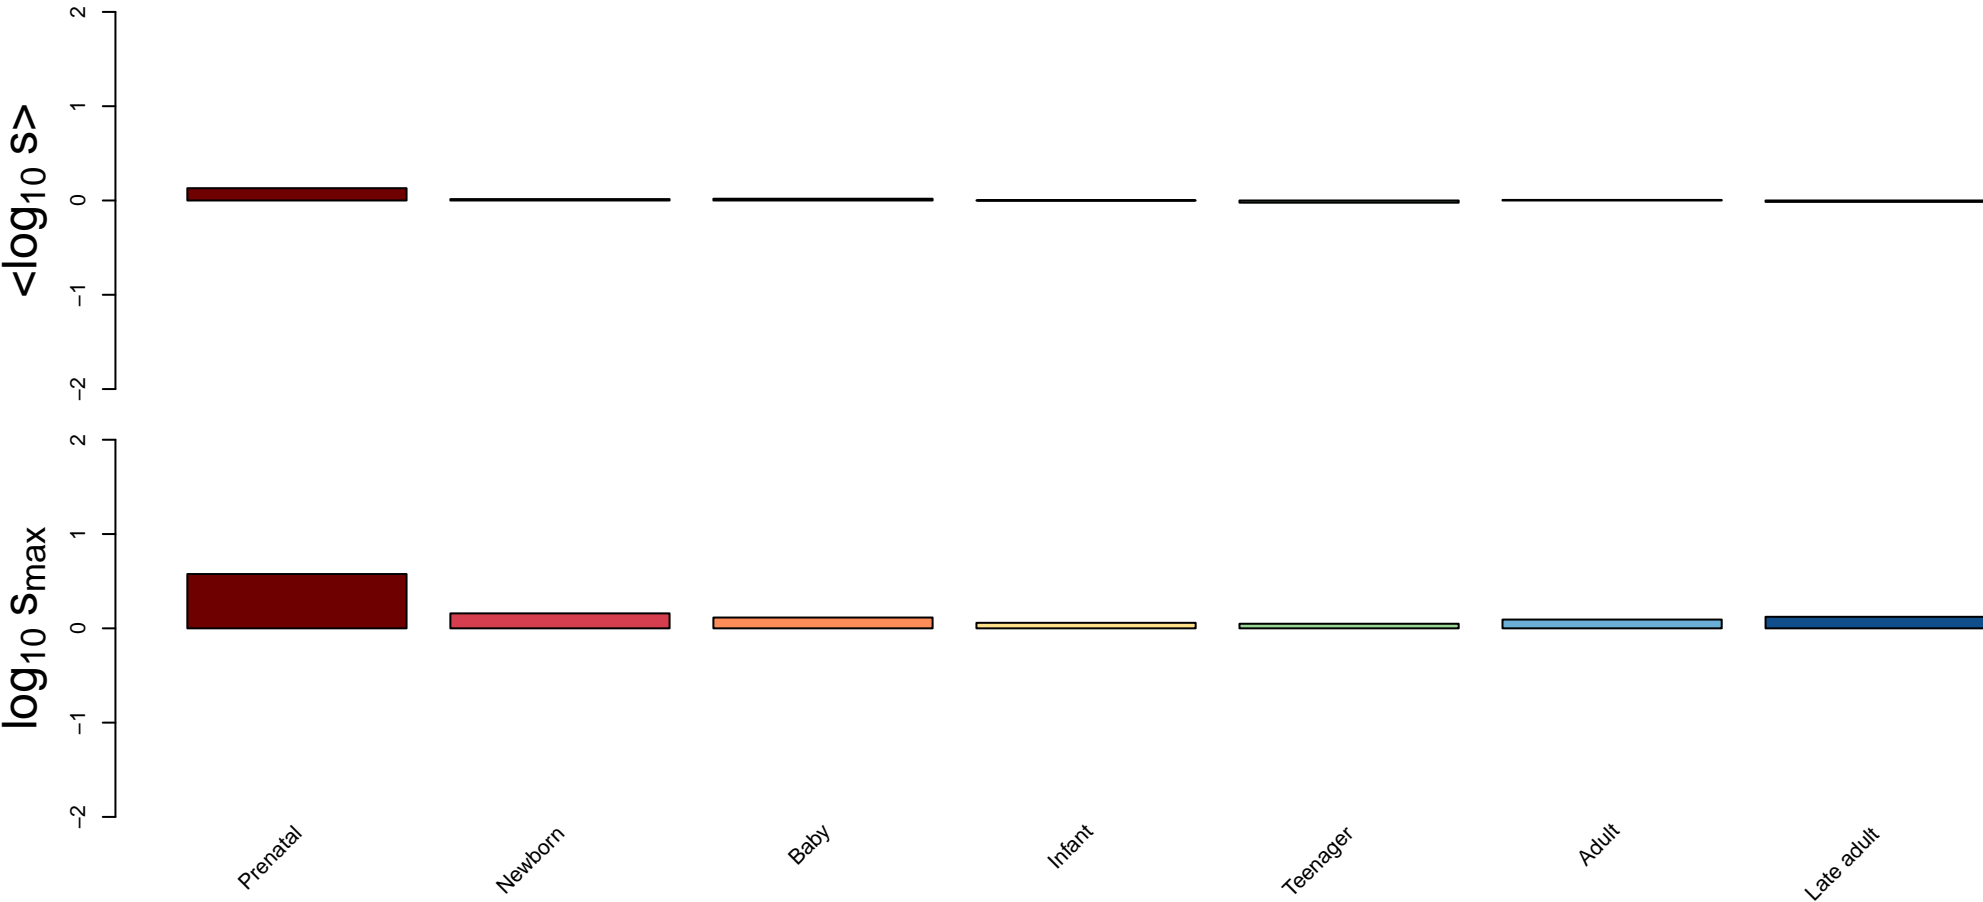

Rap1\_signaling\_pathway  
genes with data

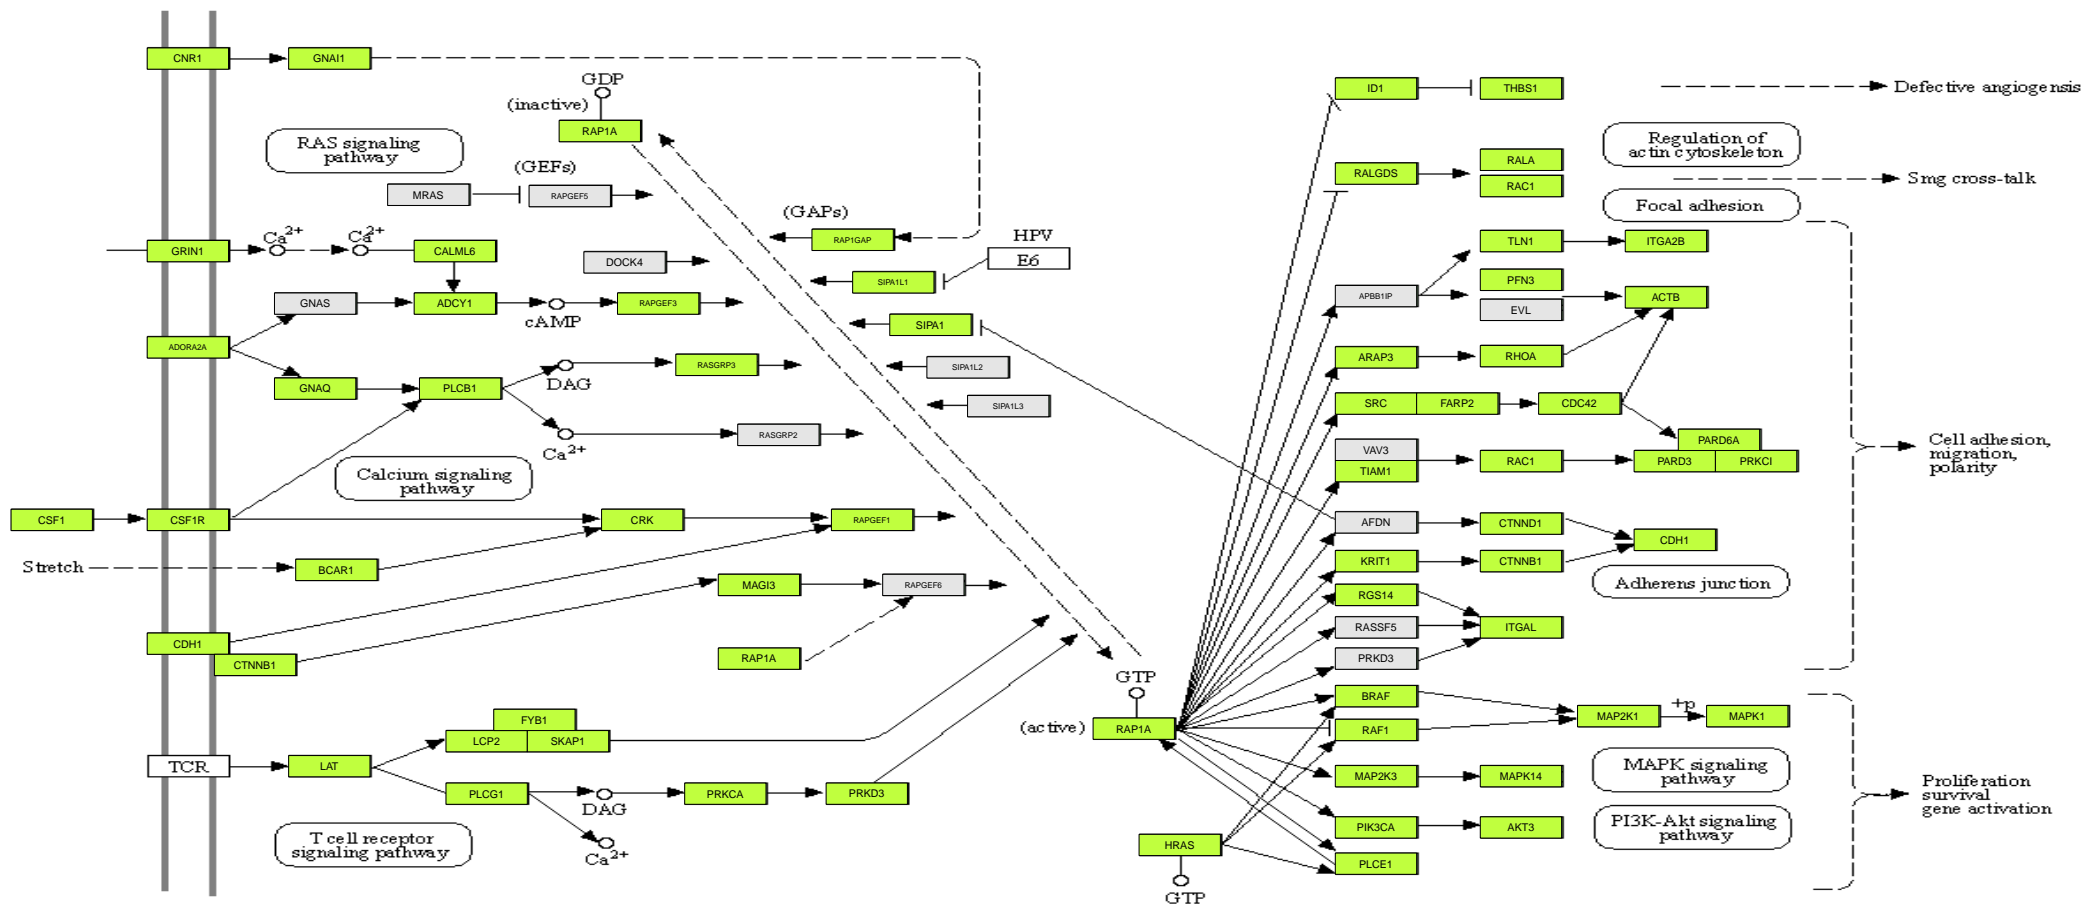

Rap1\_signaling\_pathway  
sink nodes

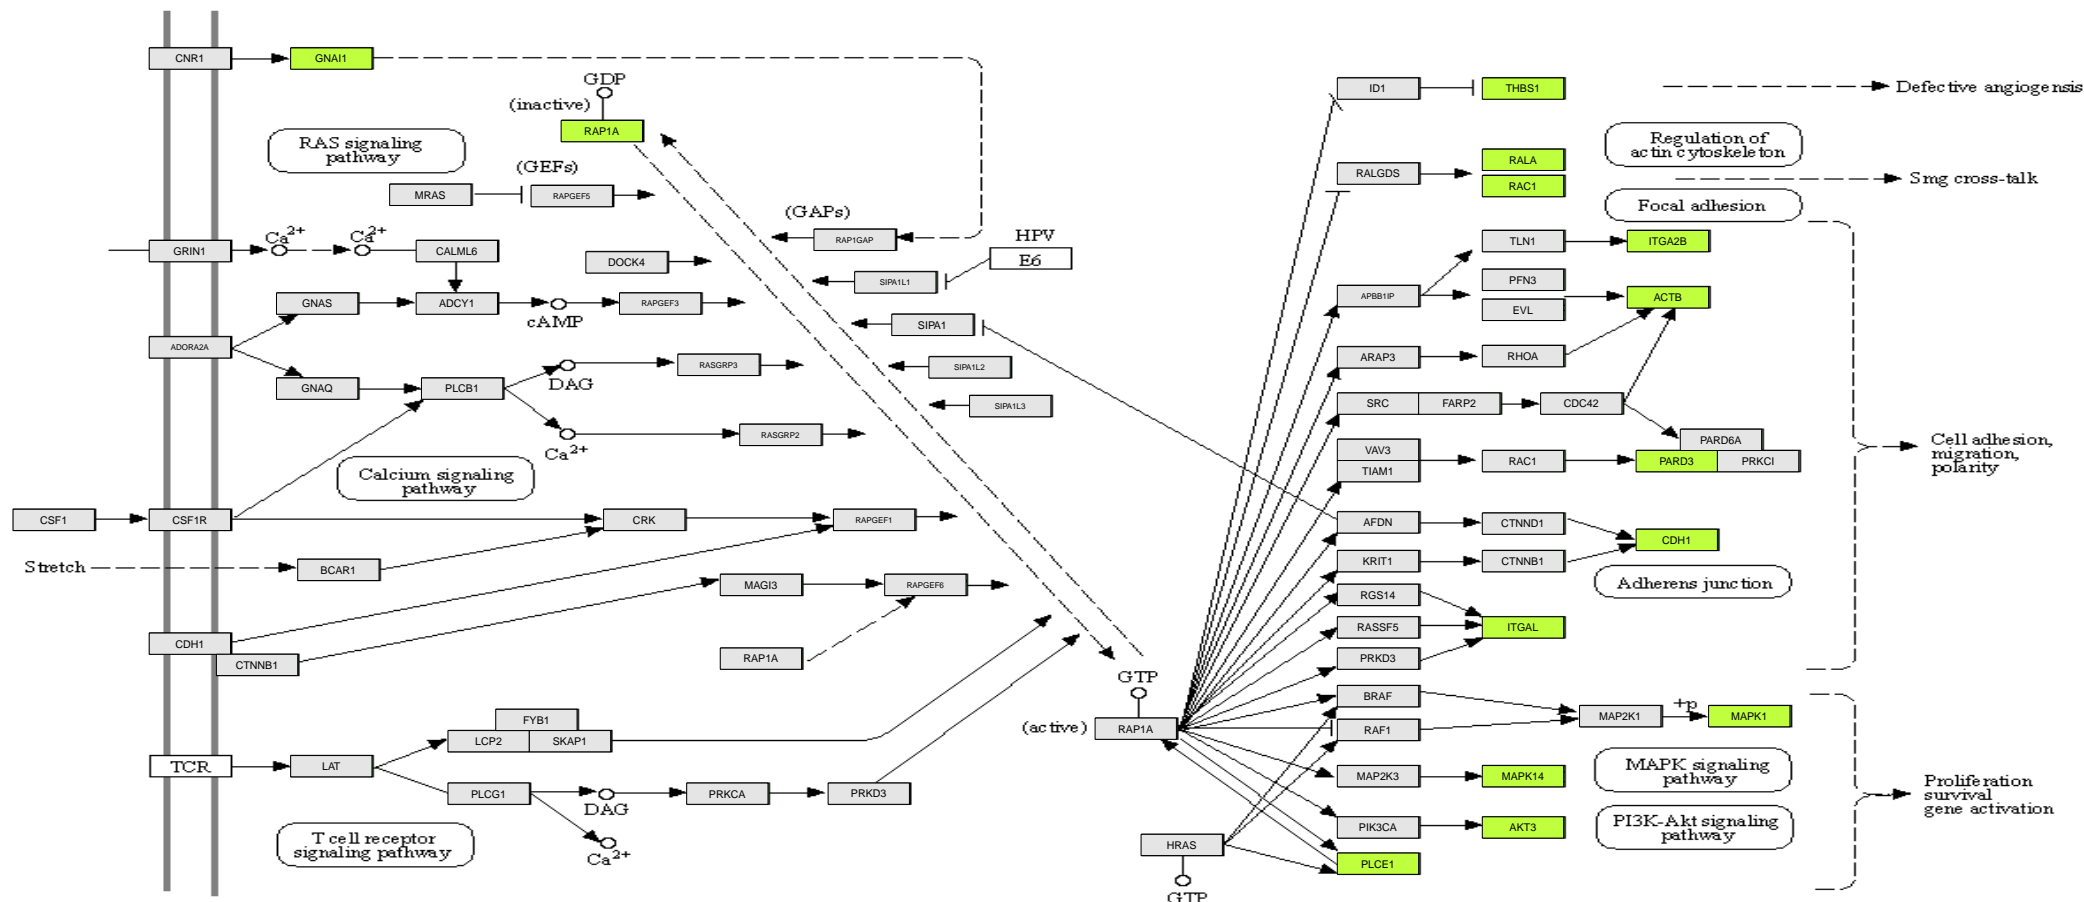

Rap1\_signaling\_pathway Prenatal

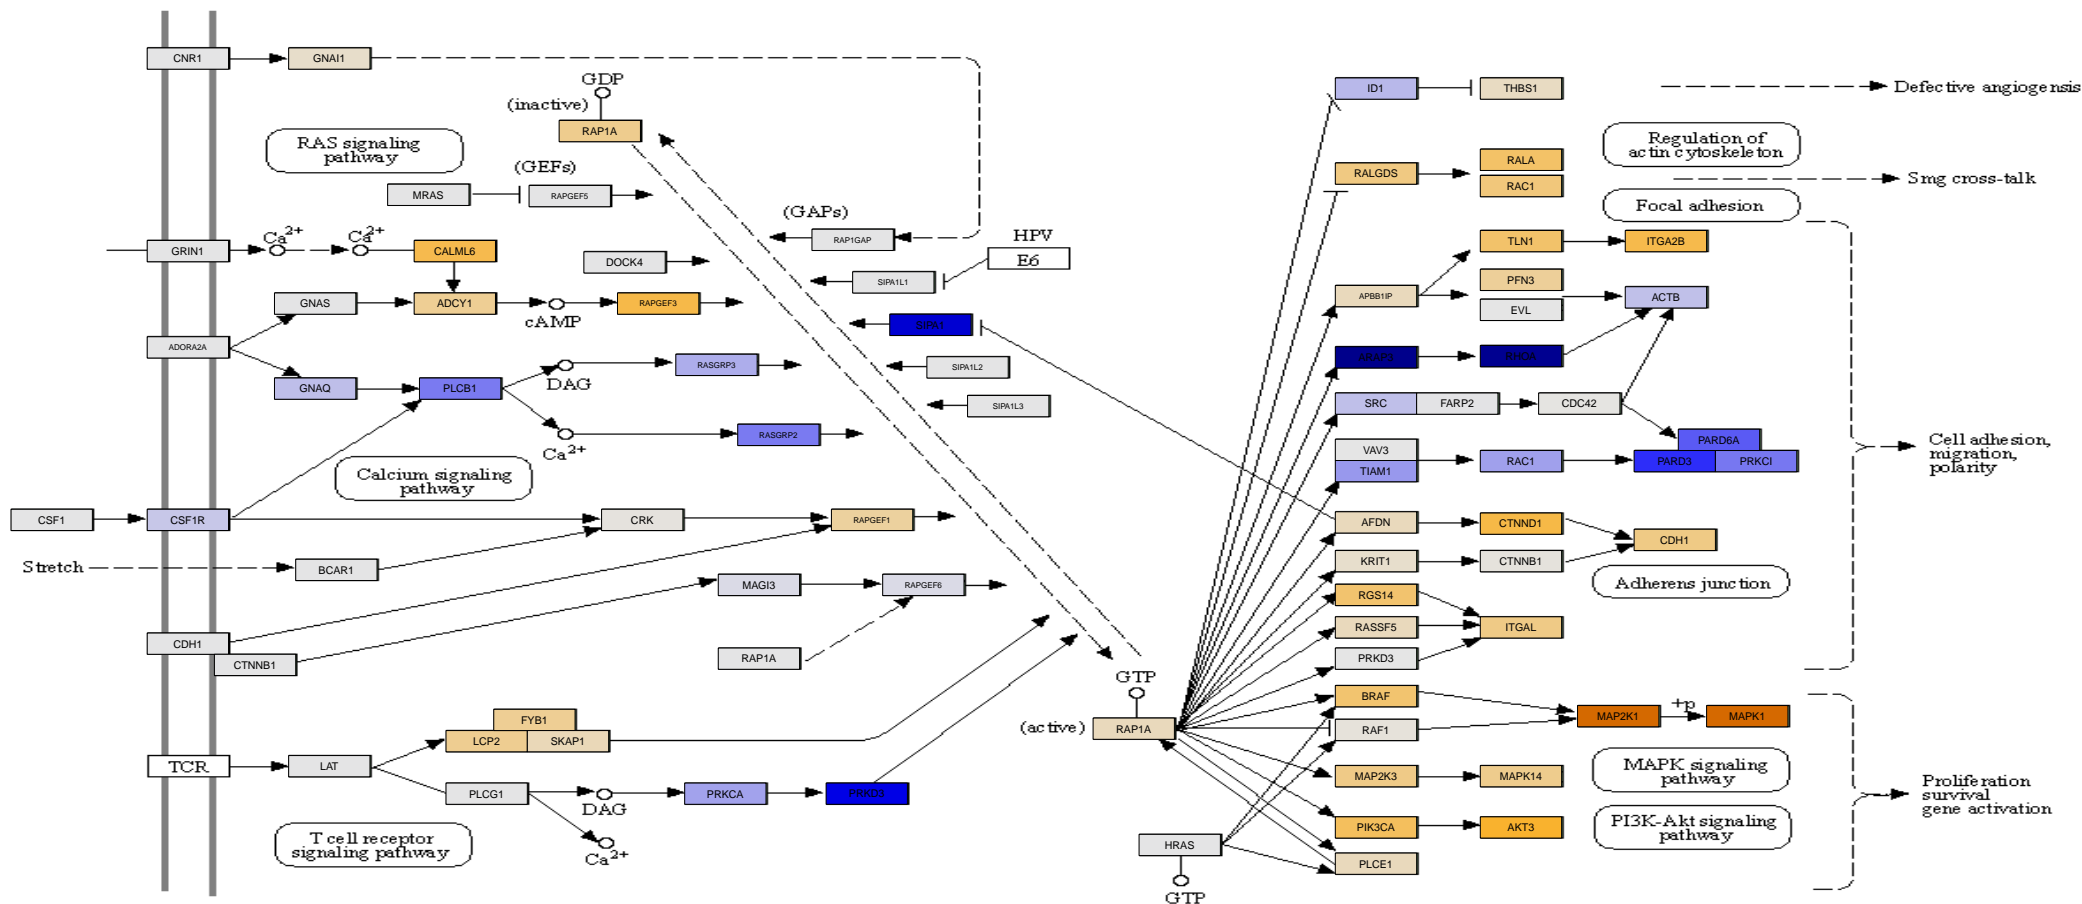

Rap1\_signaling\_pathway  
Newborn

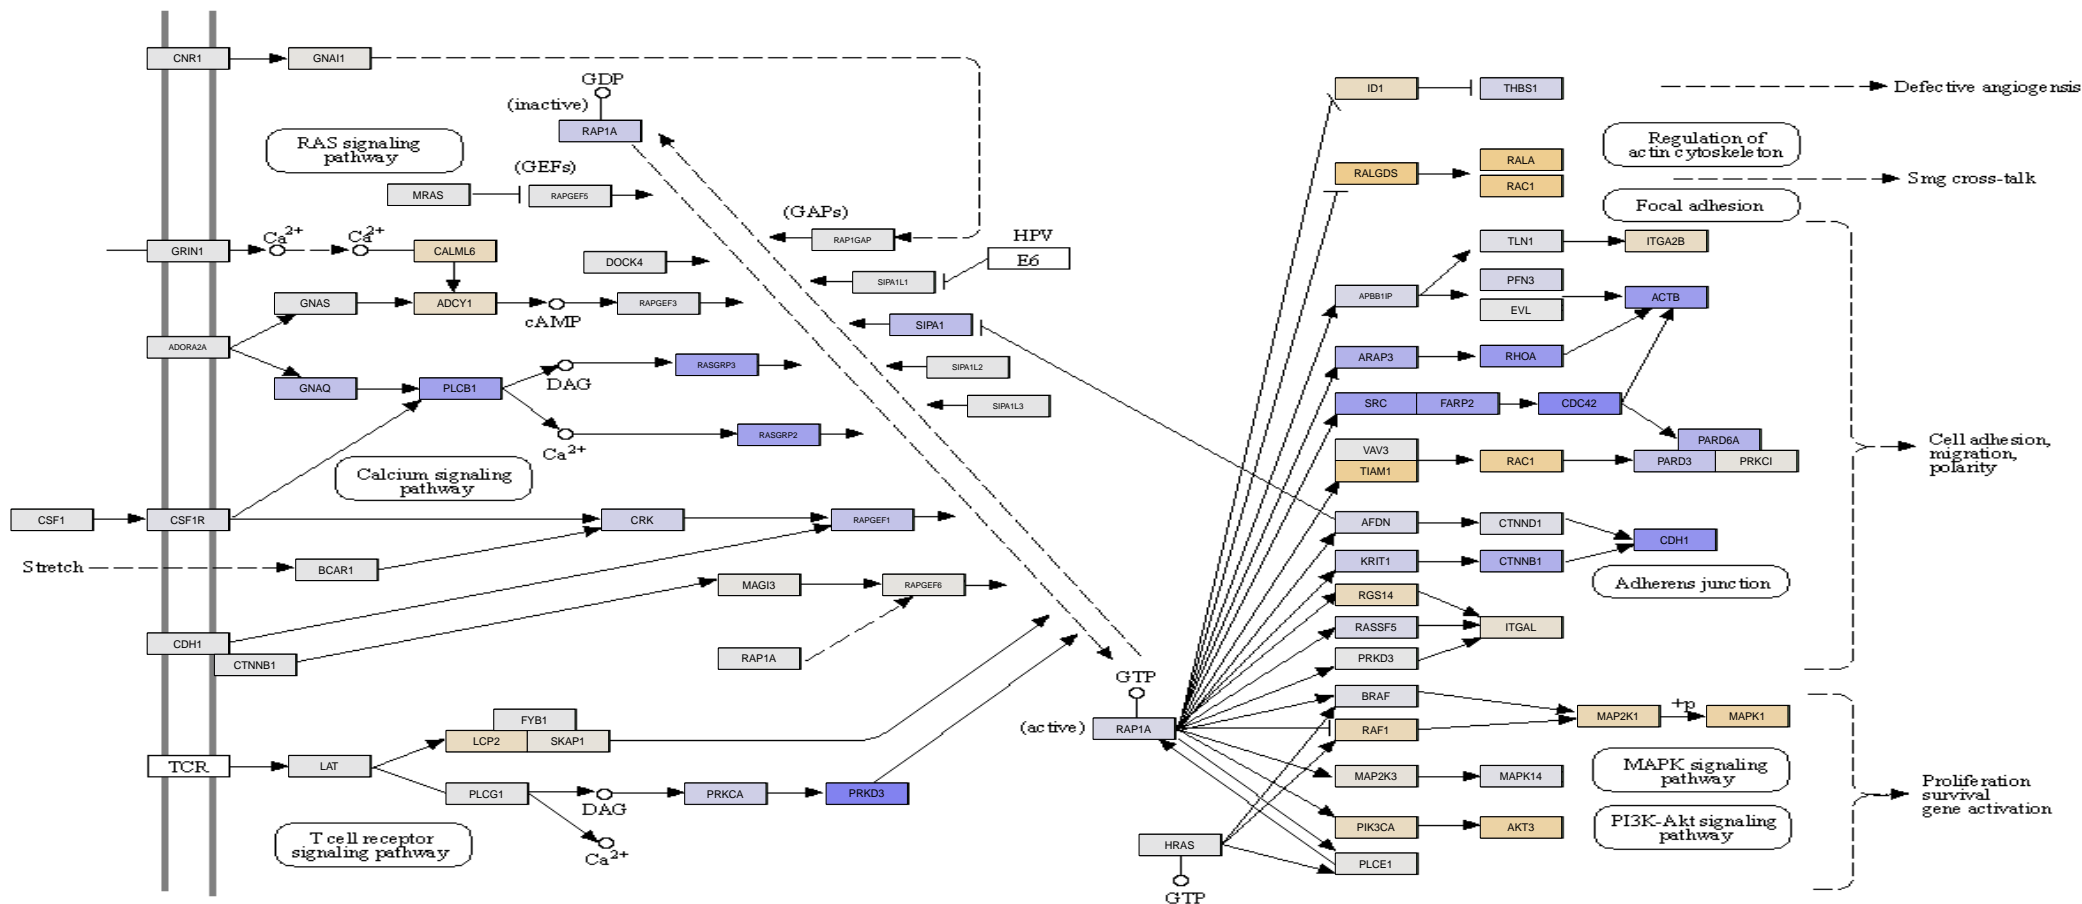

Rap1\_signaling\_pathway  
Baby

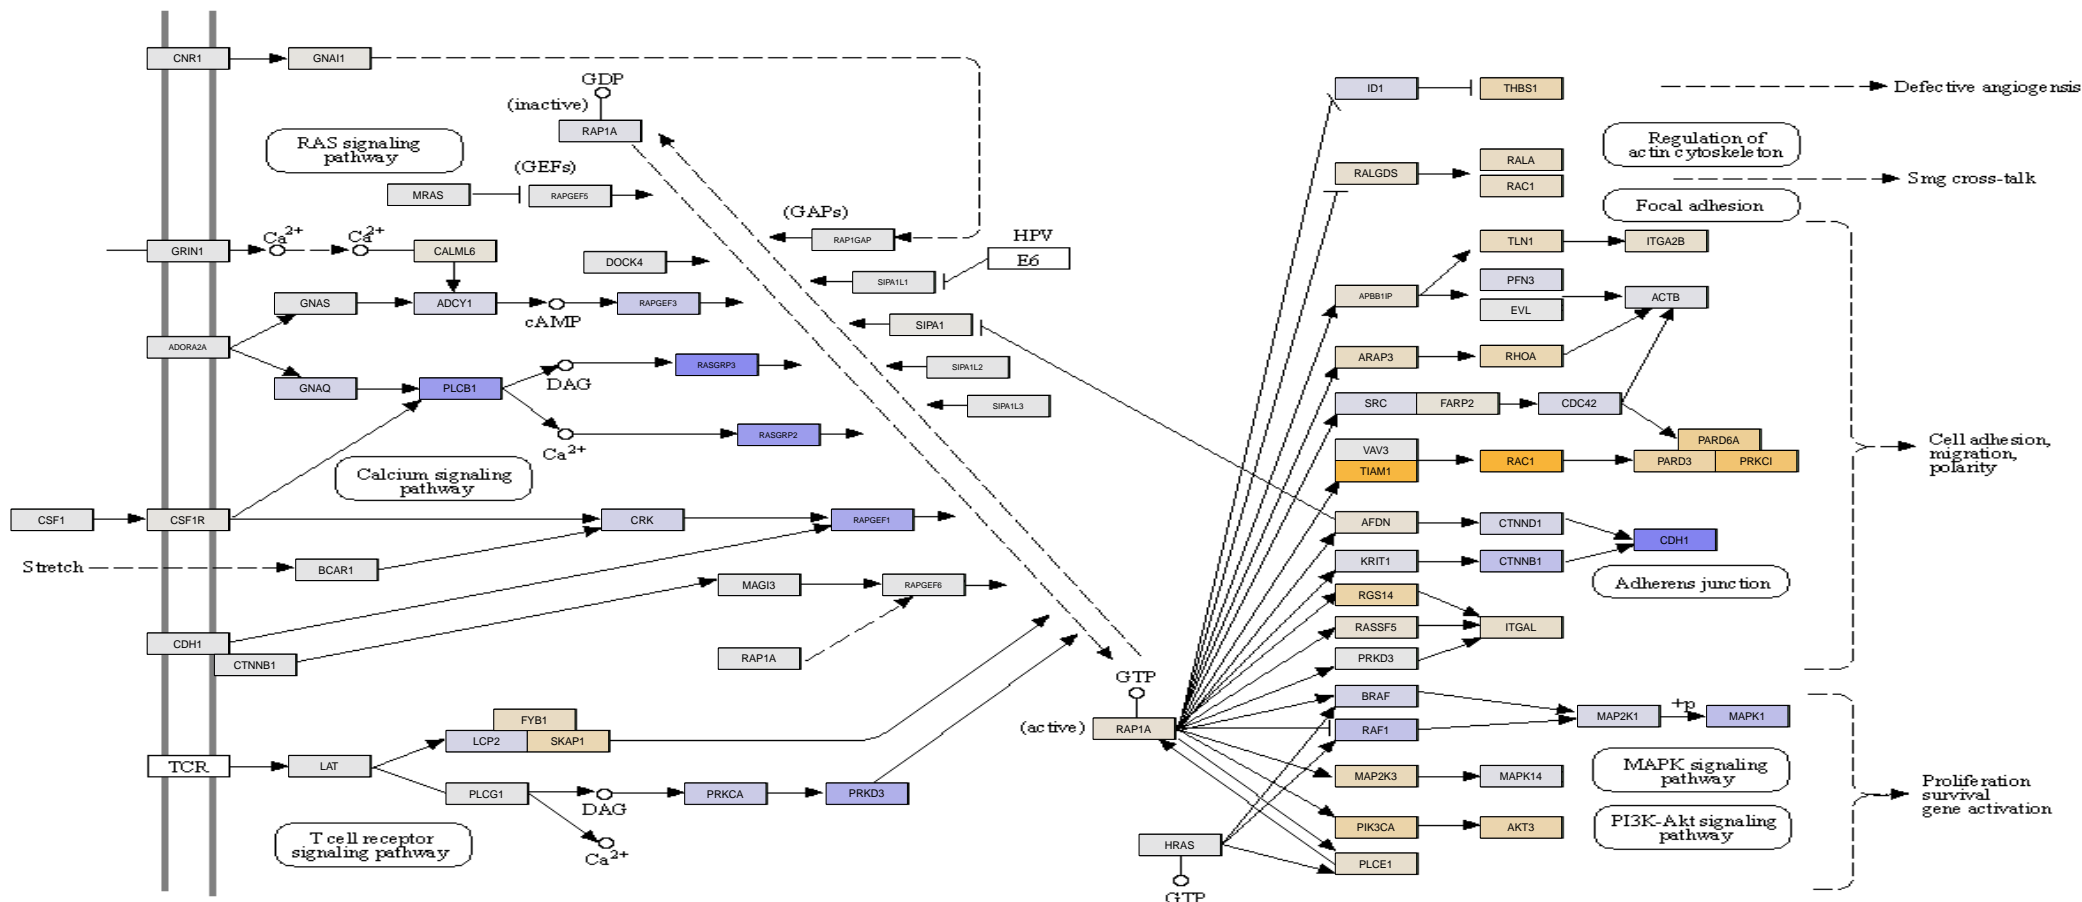

Rap1\_signaling\_pathway  
Infant

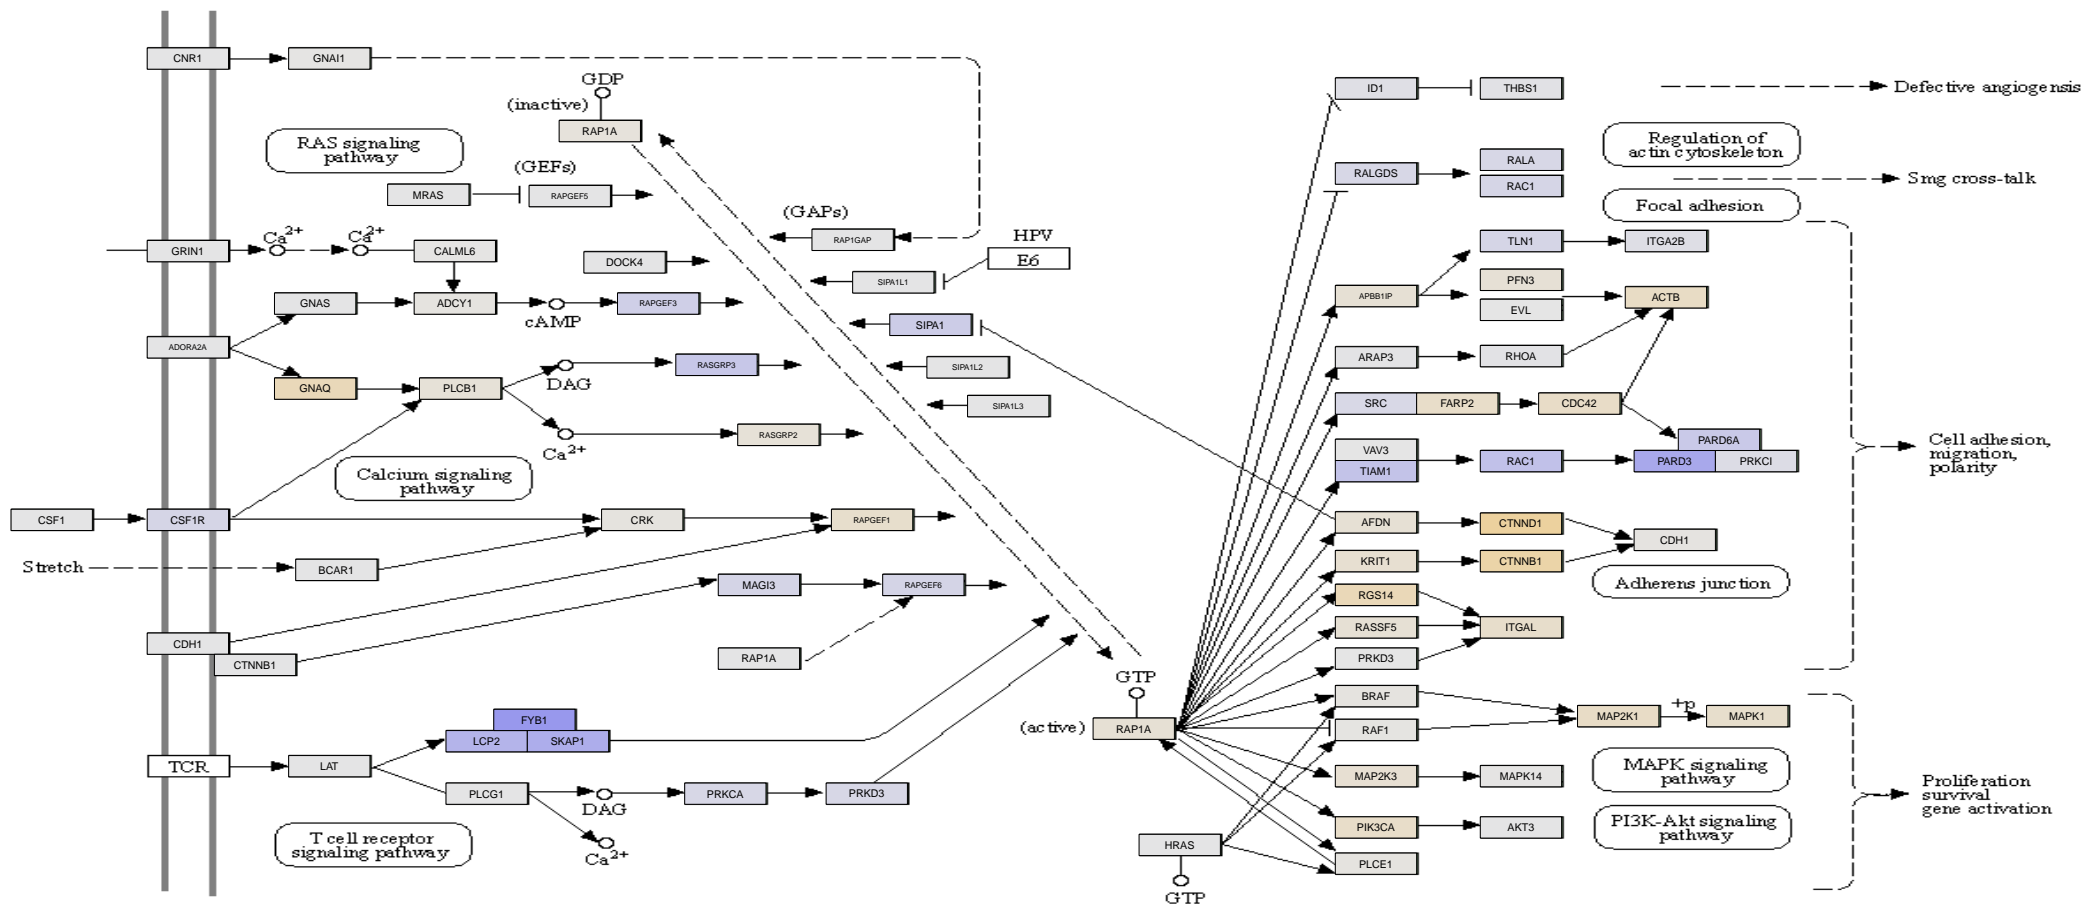

Rap1\_signaling\_pathway  
Teenager

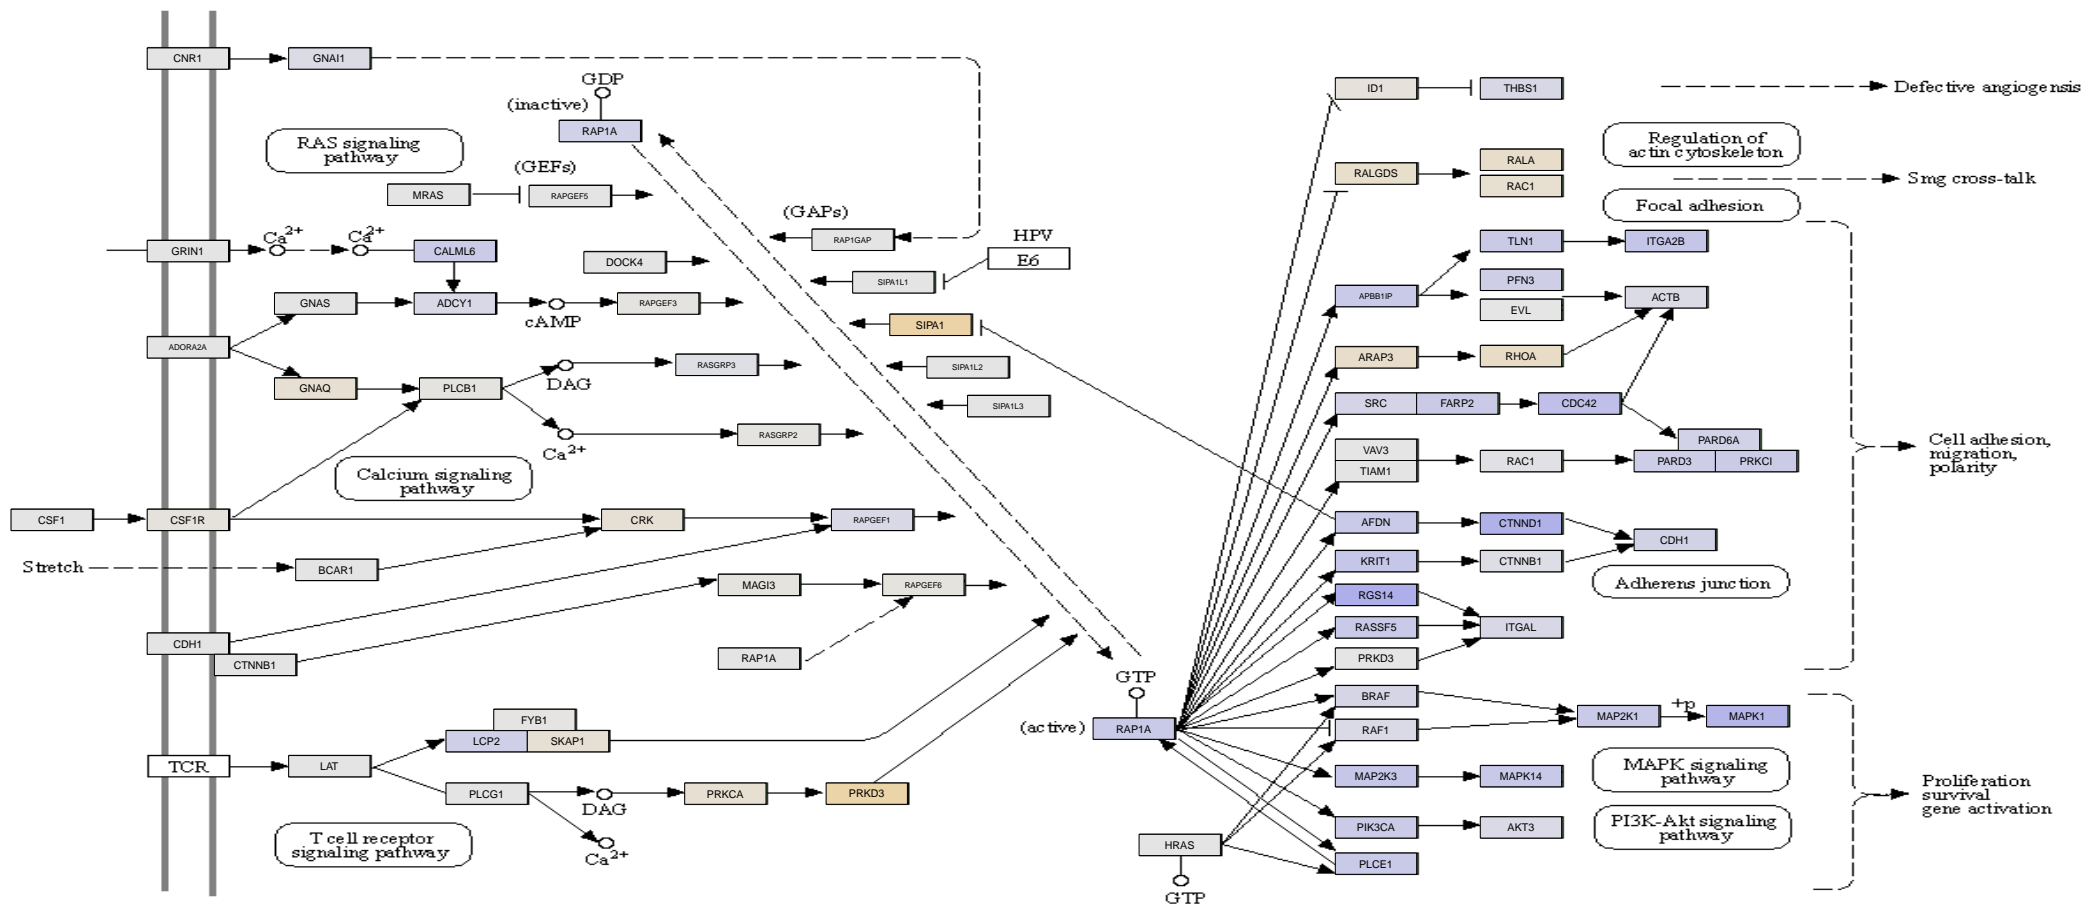



Rap1\_signaling\_pathway  
Adult

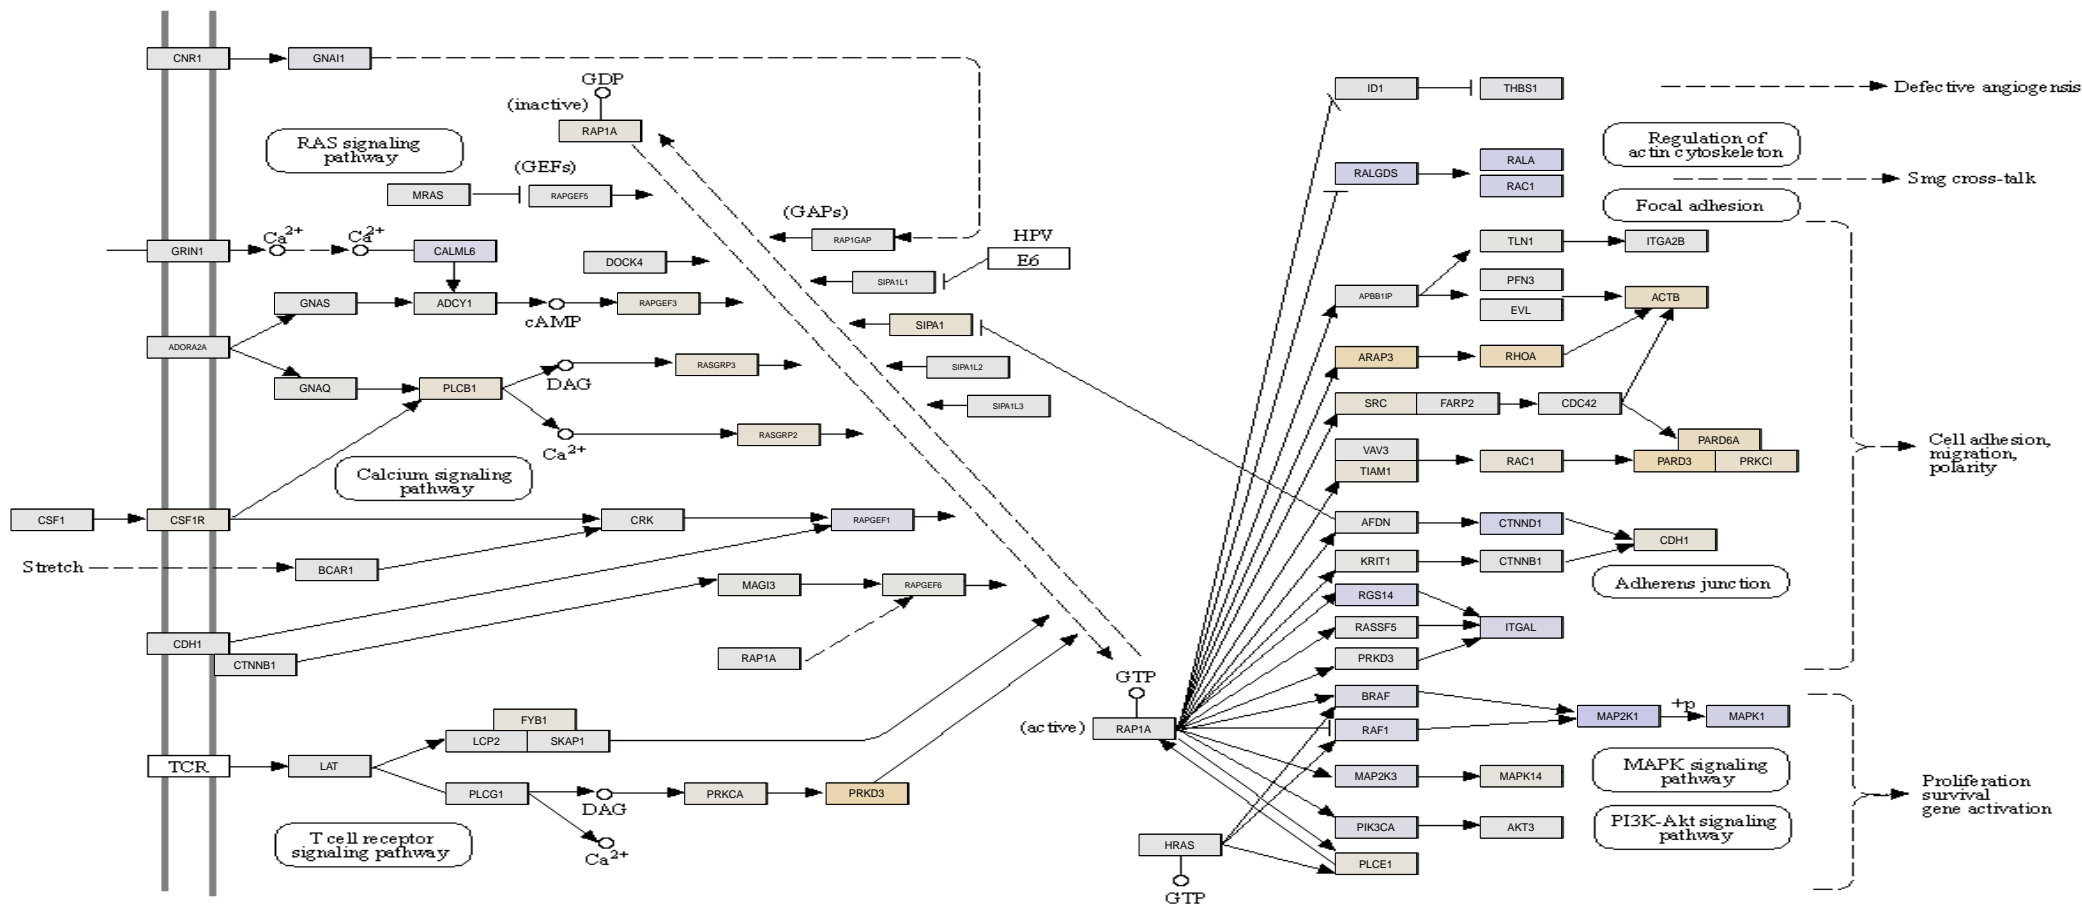

Rap1\_signaling\_pathway  
Late adult

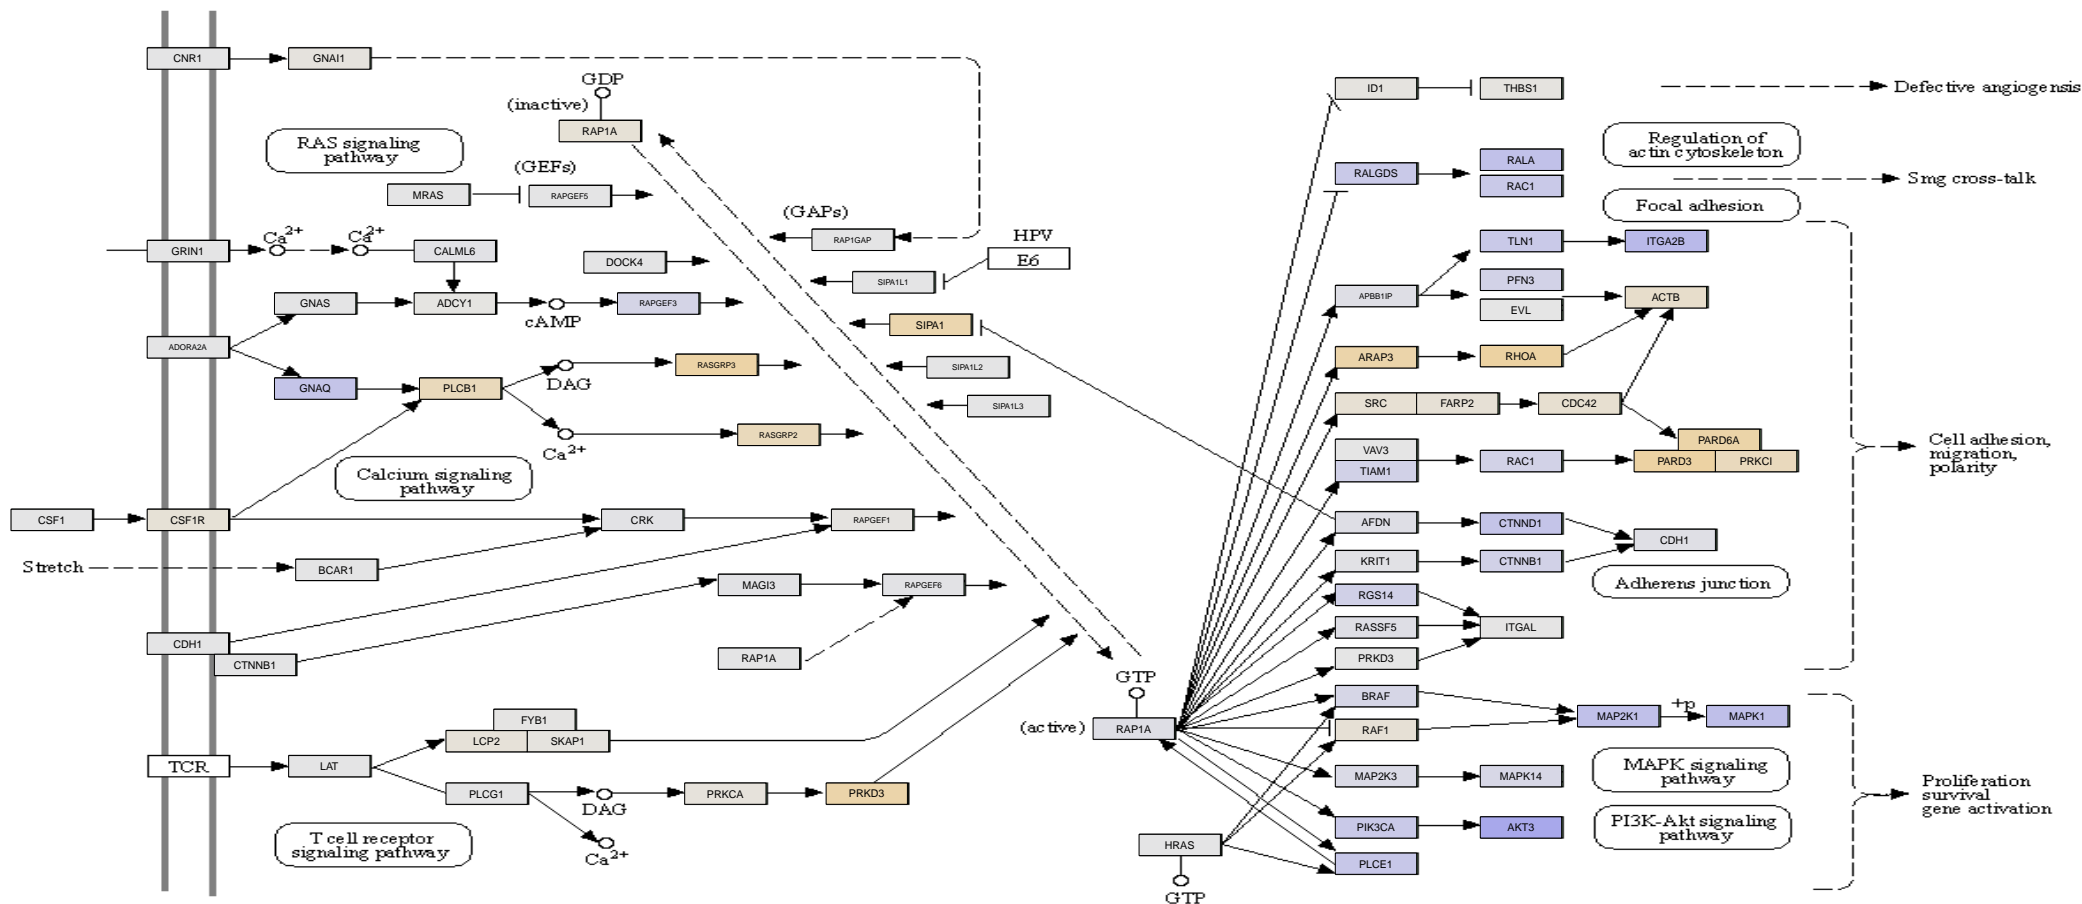

Supplement: s1 [file s1]
