# Supplementary material for: The Transcriptome and Methylome of the Developing and Aging Brain and Their Relations to Gliomas and Psychological Disorders
Source: MDPI journal article supplement (doi:10.3390/cells11030362), 2022-01-21

TGF-beta signaling pathway

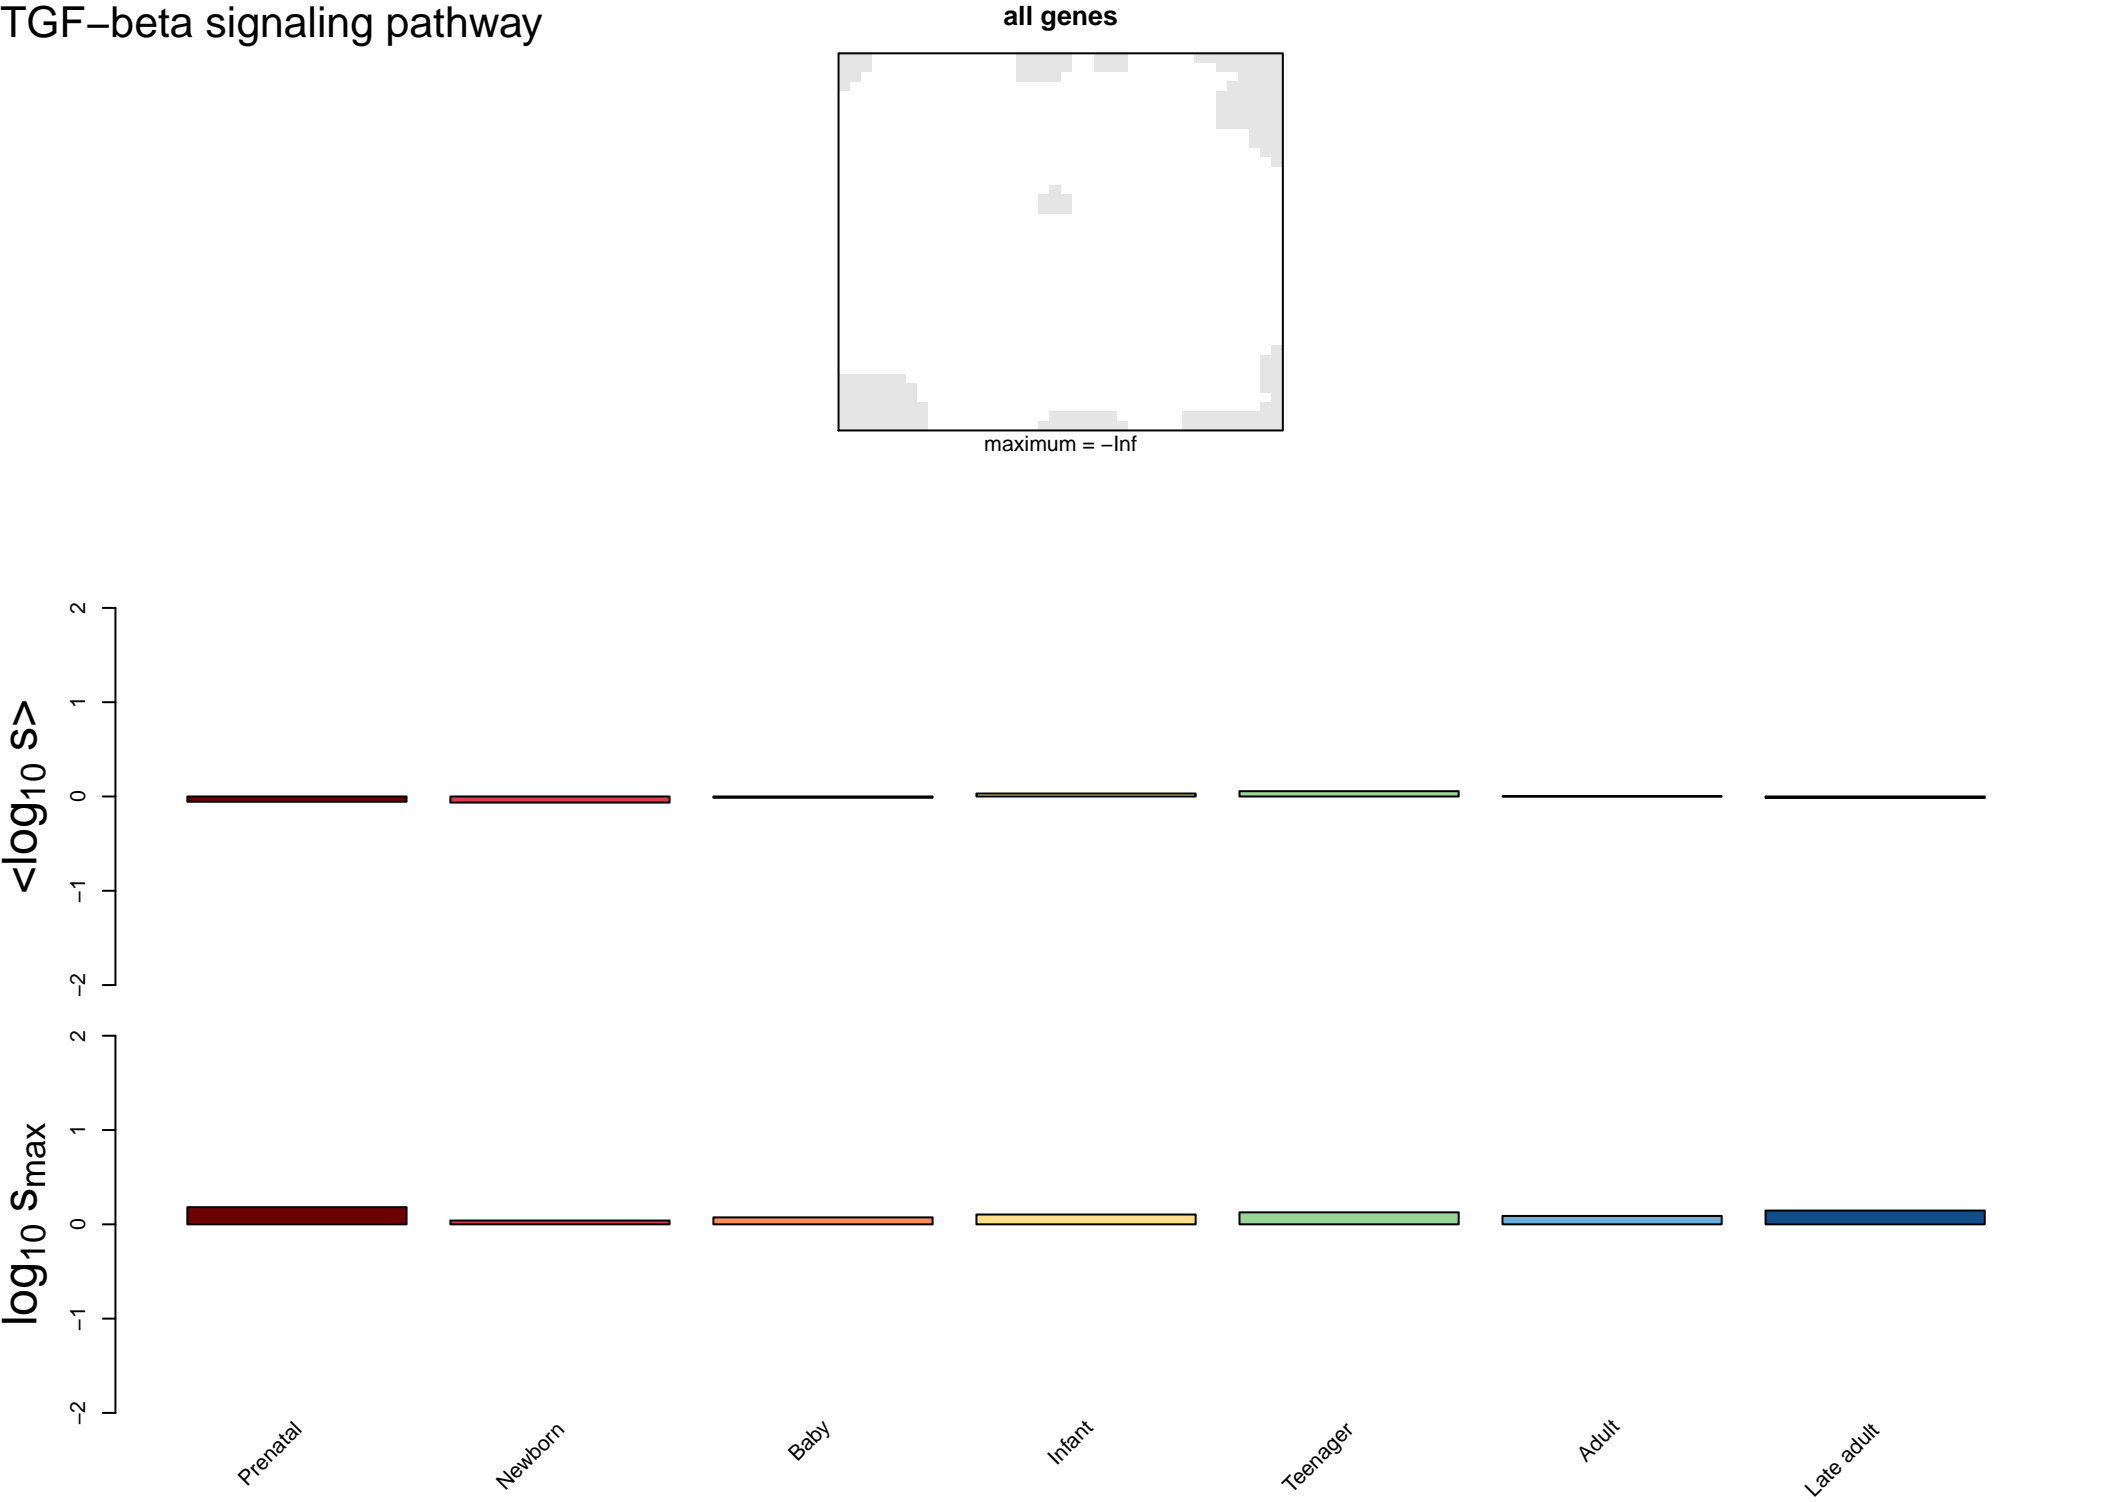

TGF\_beta\_signaling\_pathway  
genes with data

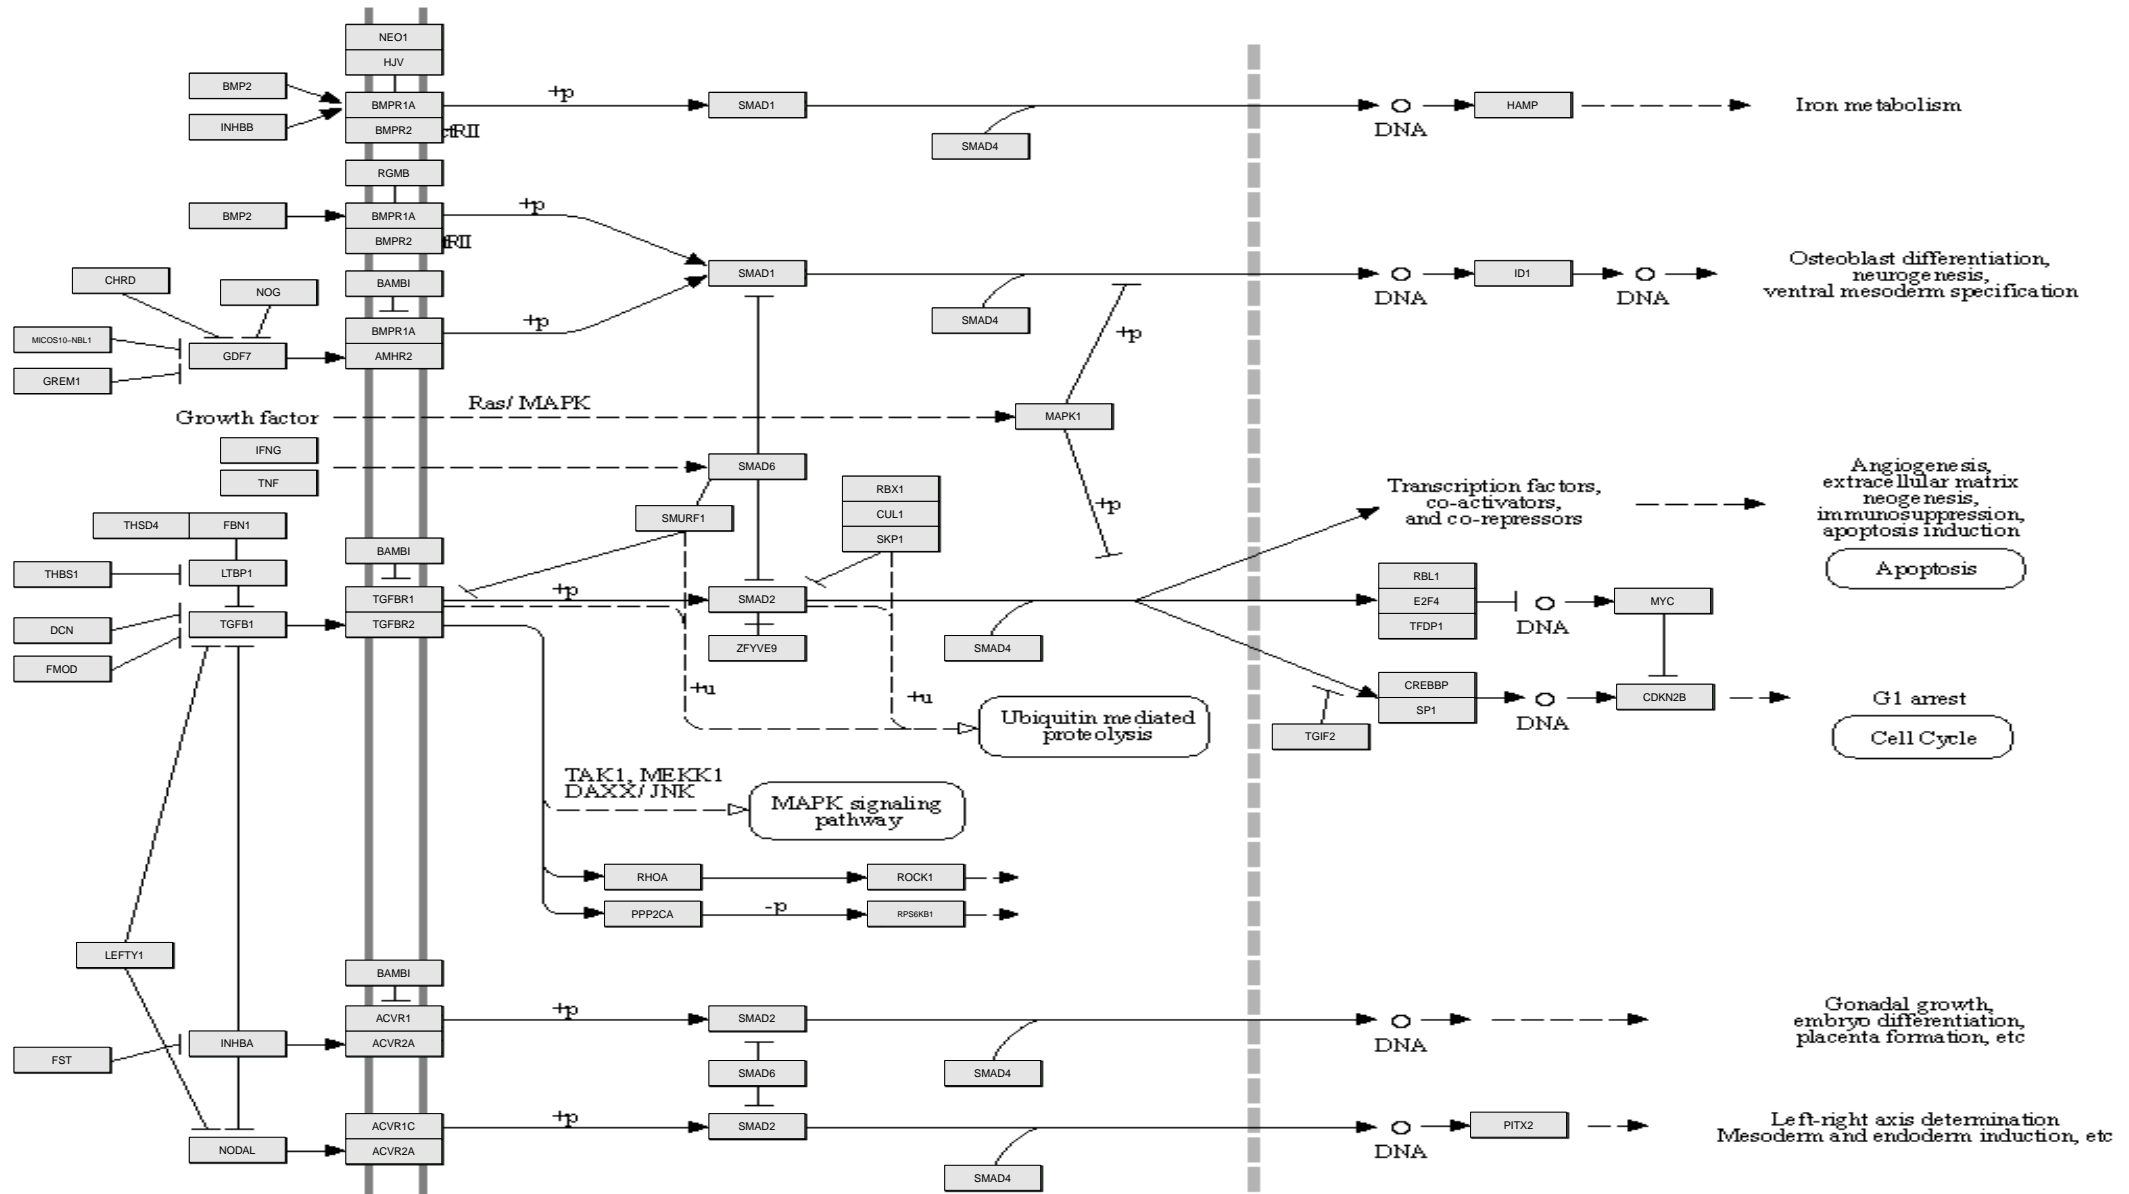

TGF\_beta\_signaling\_pathway  
sink nodes



TGF\_beta\_signaling\_pathway  
Prenatal



TGF\_beta\_signaling\_pathway  
Newborn



TGF\_beta\_signaling\_pathway  
Baby



TGF\_beta\_signaling\_pathway  
Infant



TGF\_beta\_signaling\_pathway  
Teenager

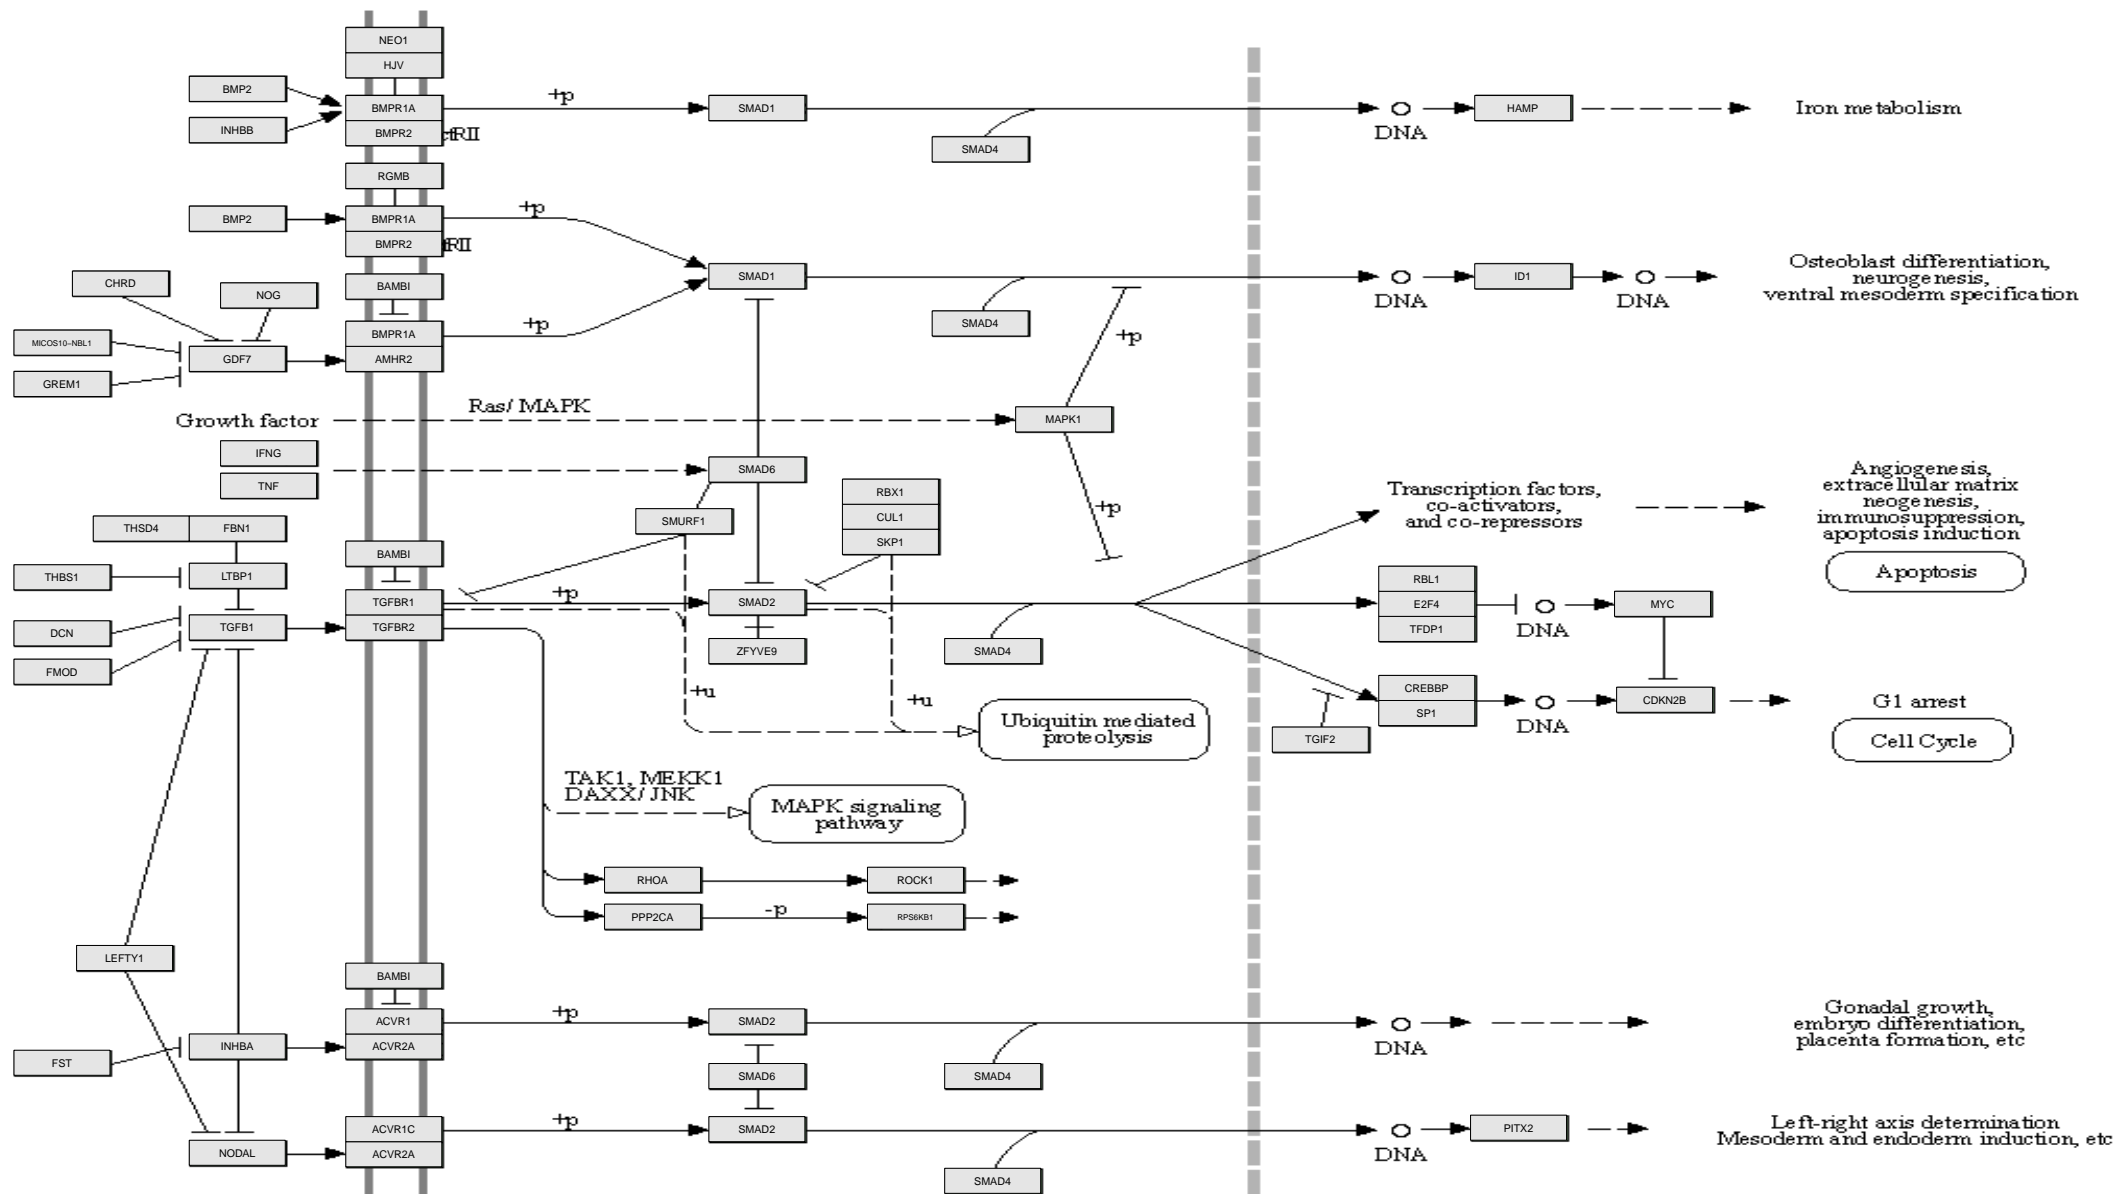





TGF\_beta\_signaling\_pathway  
Late adult



Supplement: s1 [file s1]
