# Supplementary material for: The Transcriptome and Methylome of the Developing and Aging Brain and Their Relations to Gliomas and Psychological Disorders
Source: MDPI journal article supplement (doi:10.3390/cells11030362), 2022-01-21

Notch signaling pathway

all genes

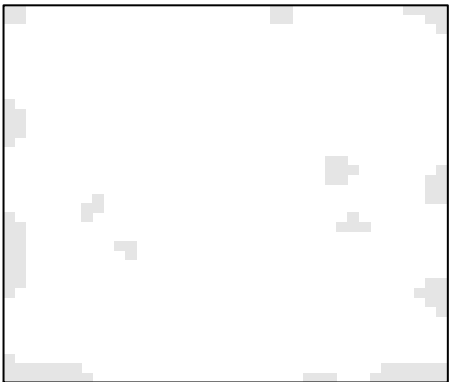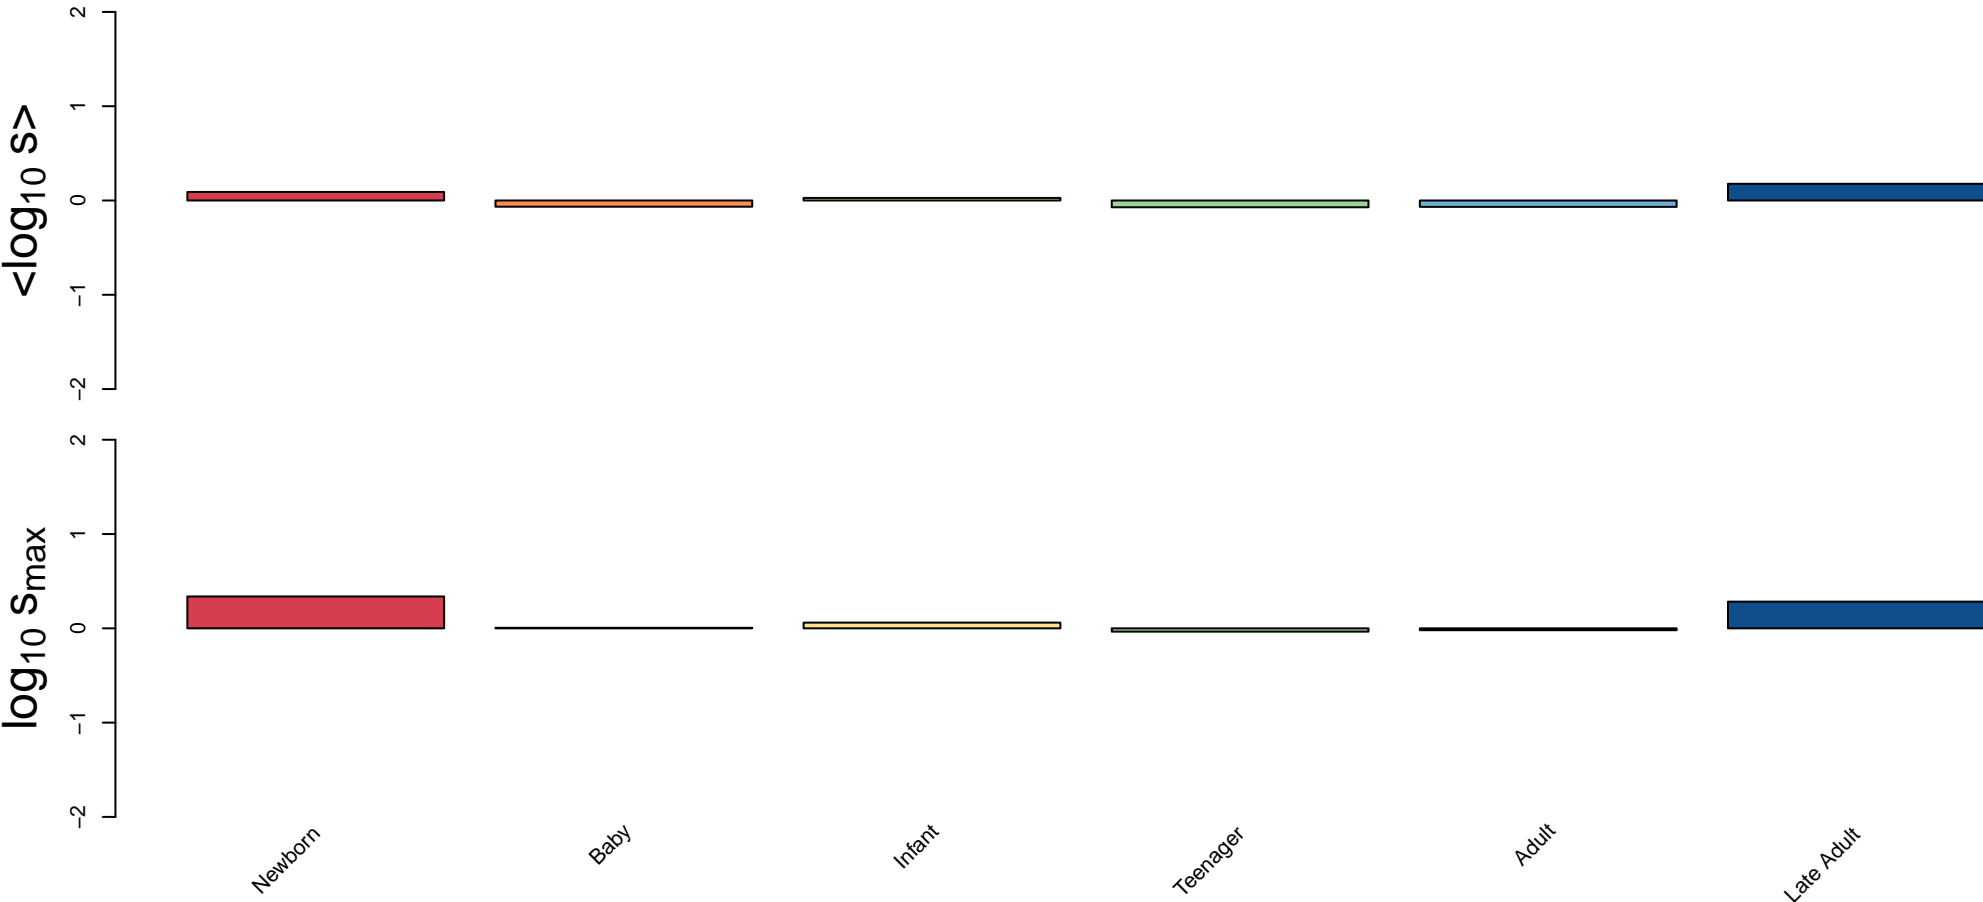

Notch\_signaling\_pathway  
genes with data

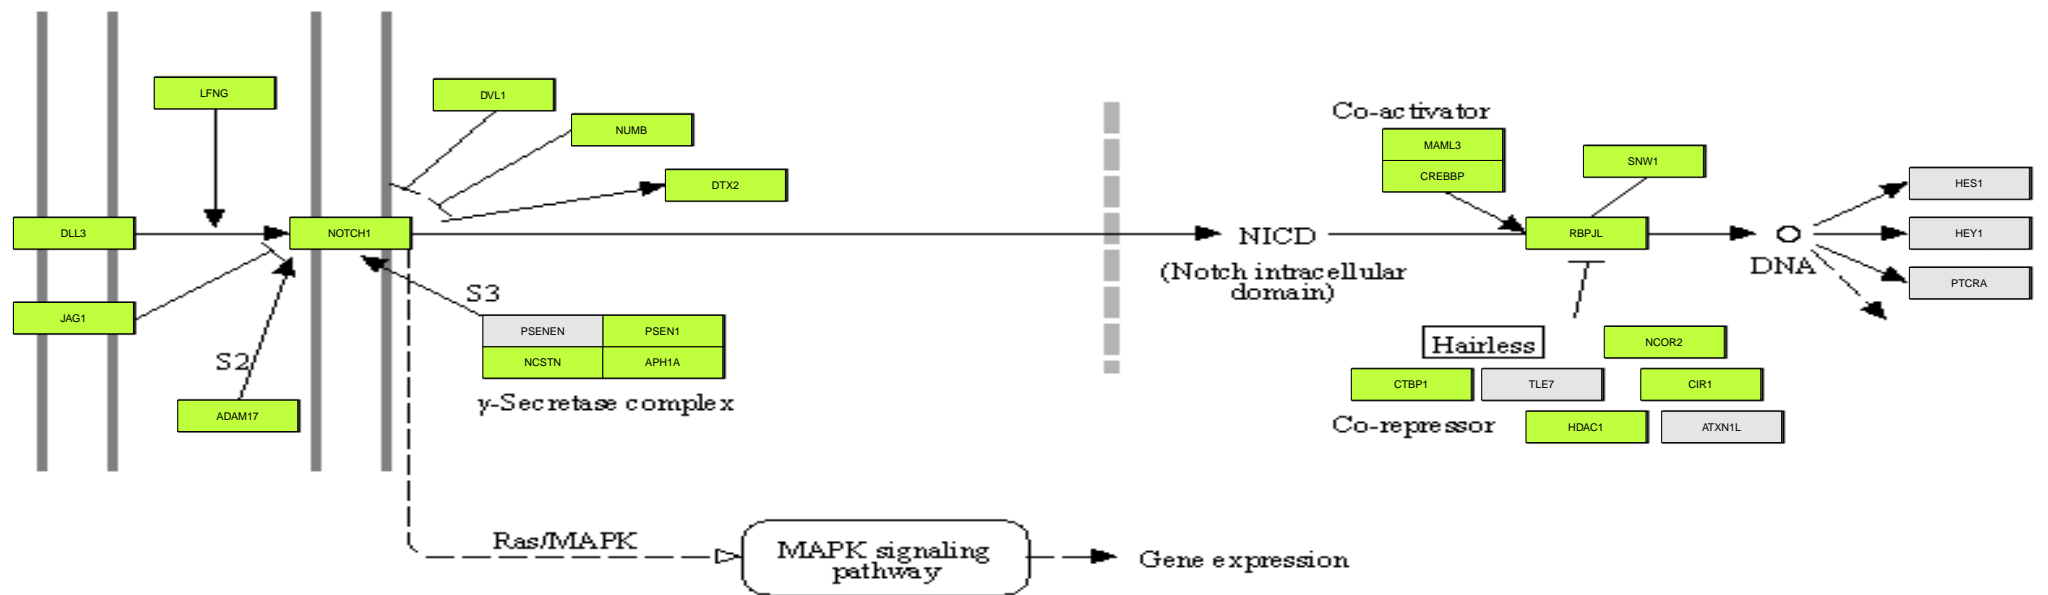

Notch\_signaling\_pathway  
sink nodes

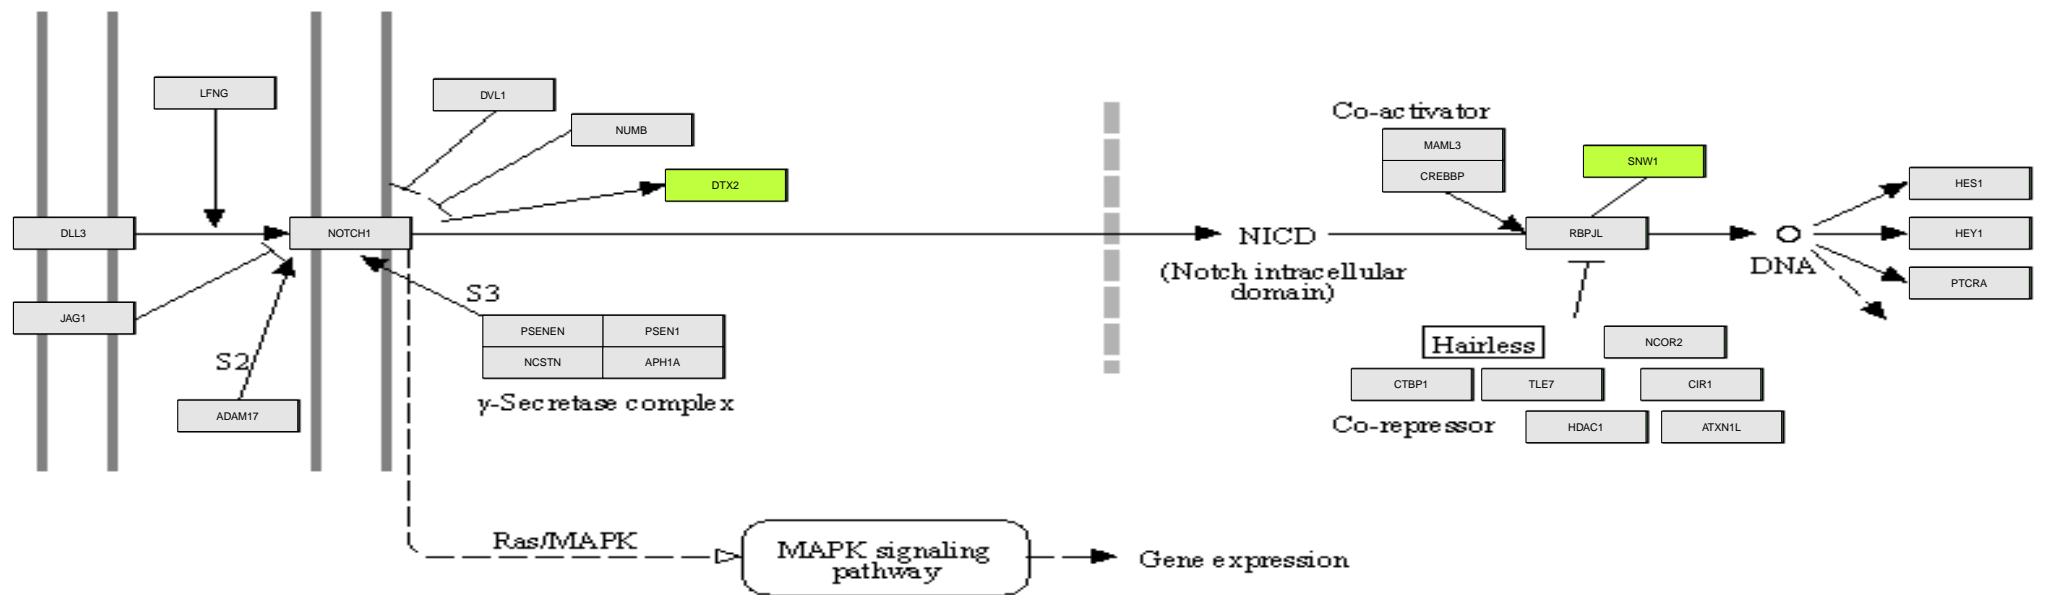

Notch\_signaling\_pathway  
Newborn

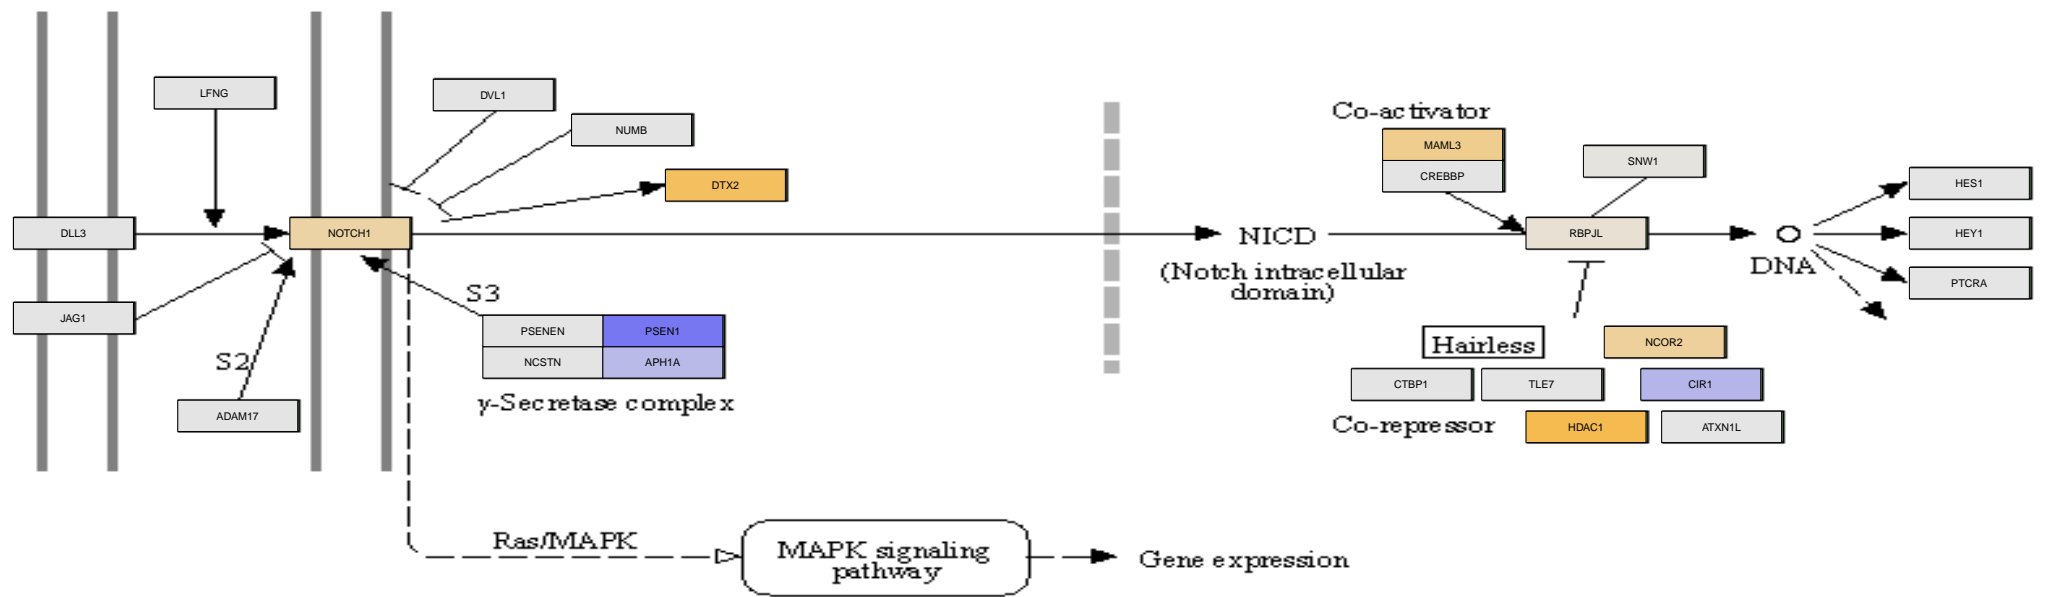

Notch signaling pathway  
Baby

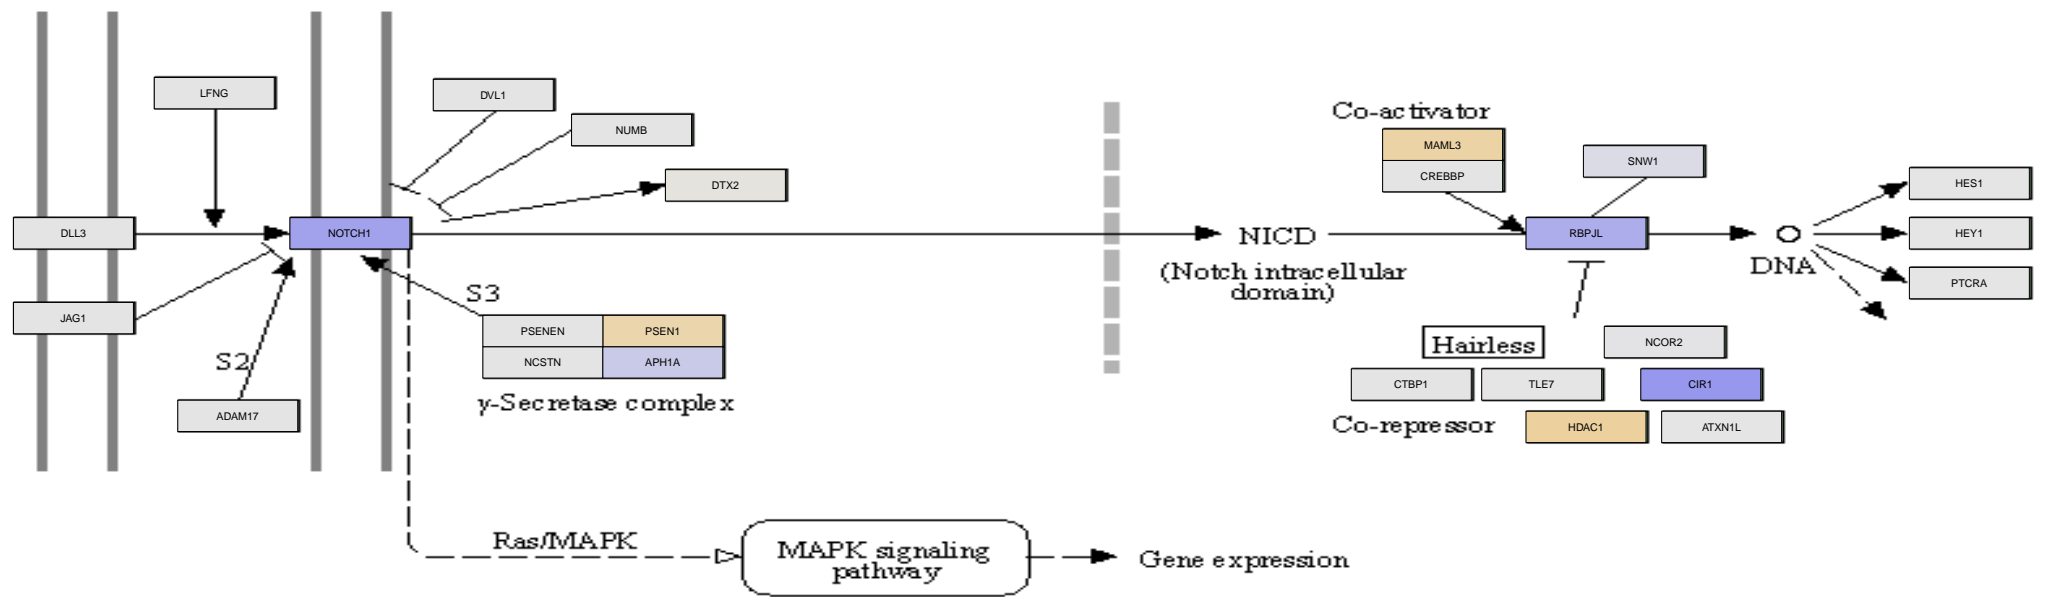

Notch signaling pathway  
Infant

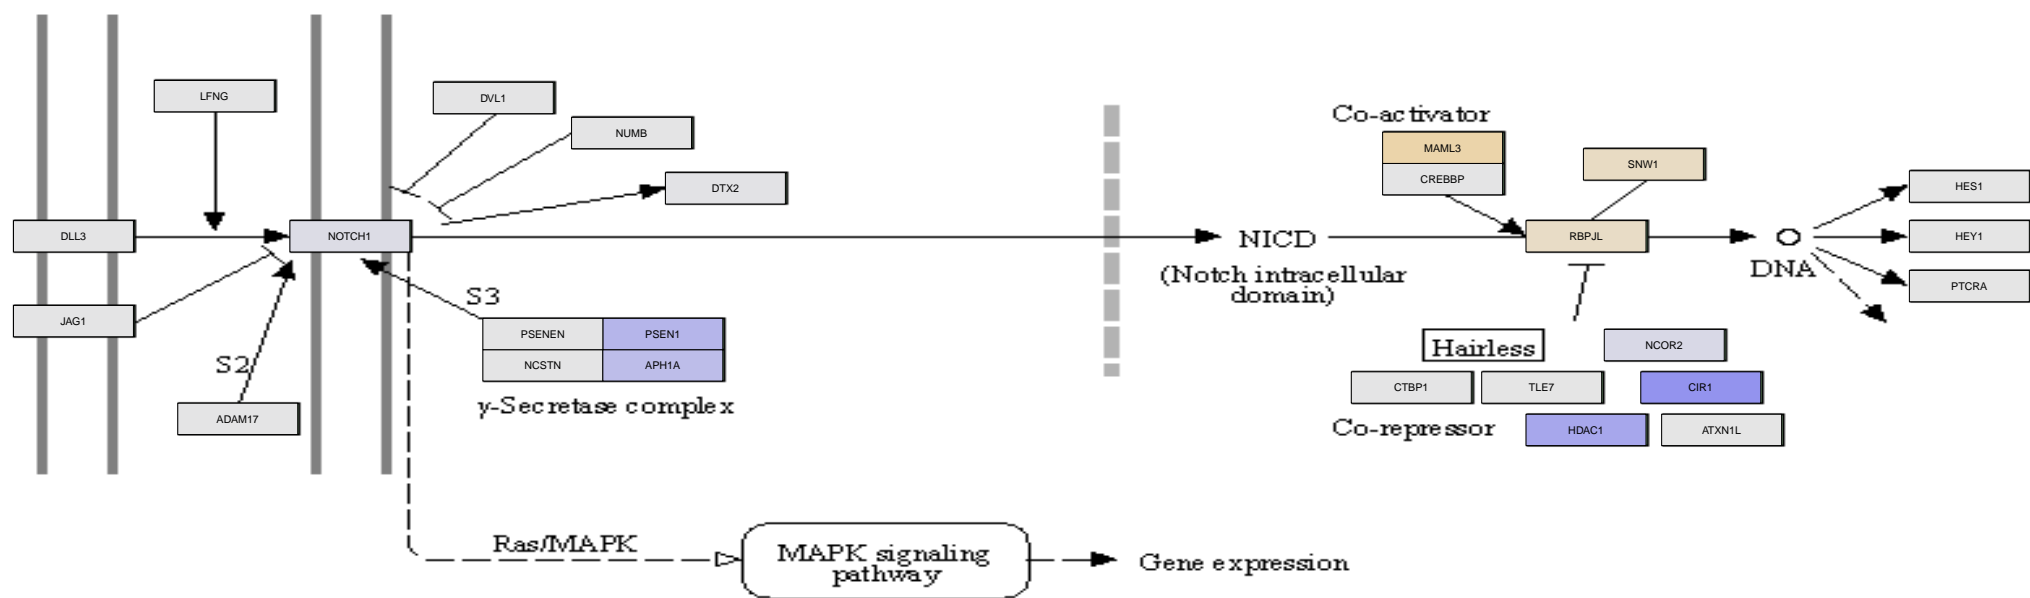

Notch signaling pathway  
Teenager

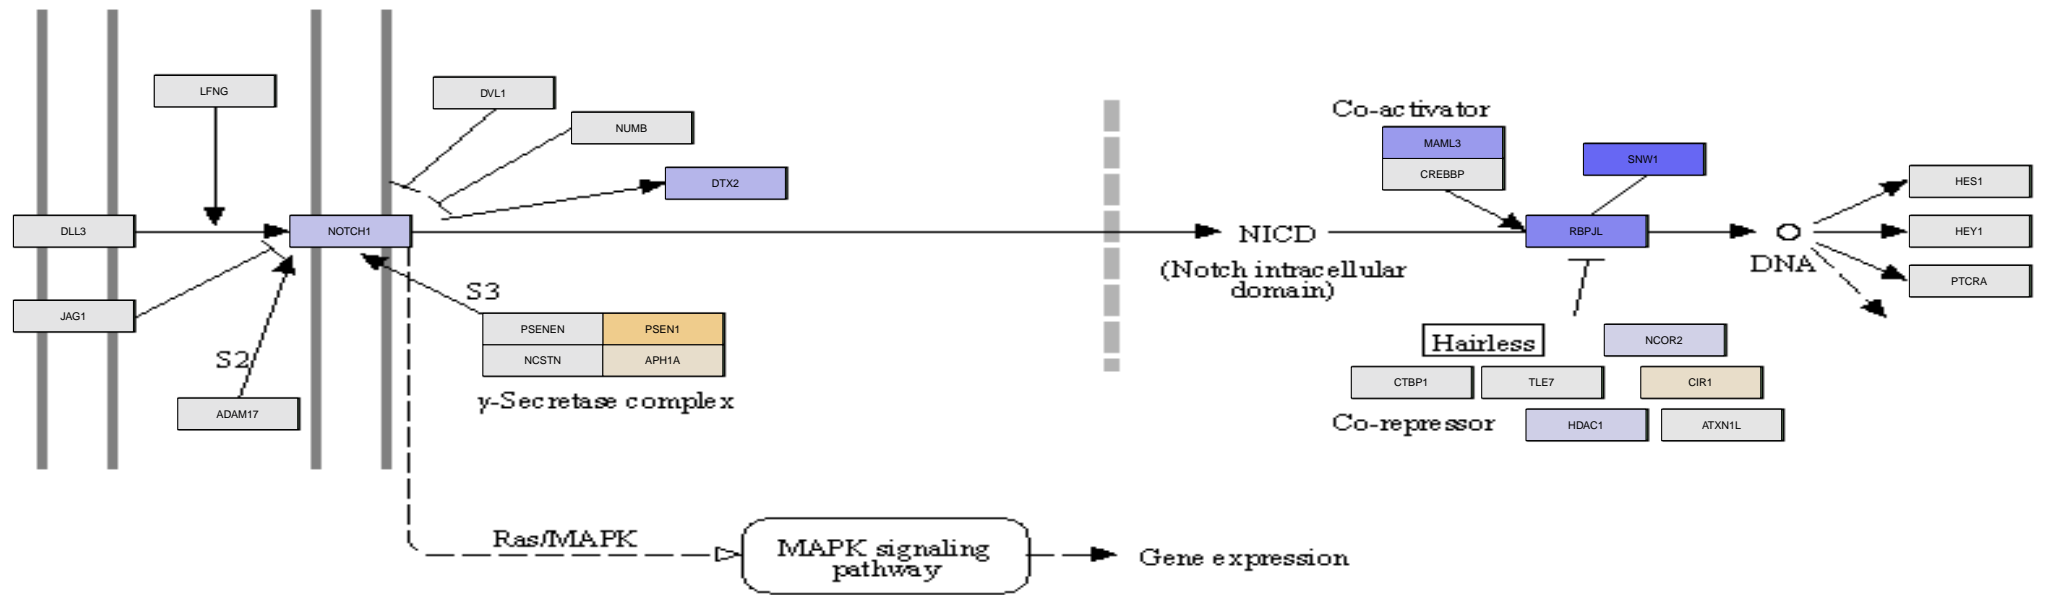

Notch signaling pathway  
Adult

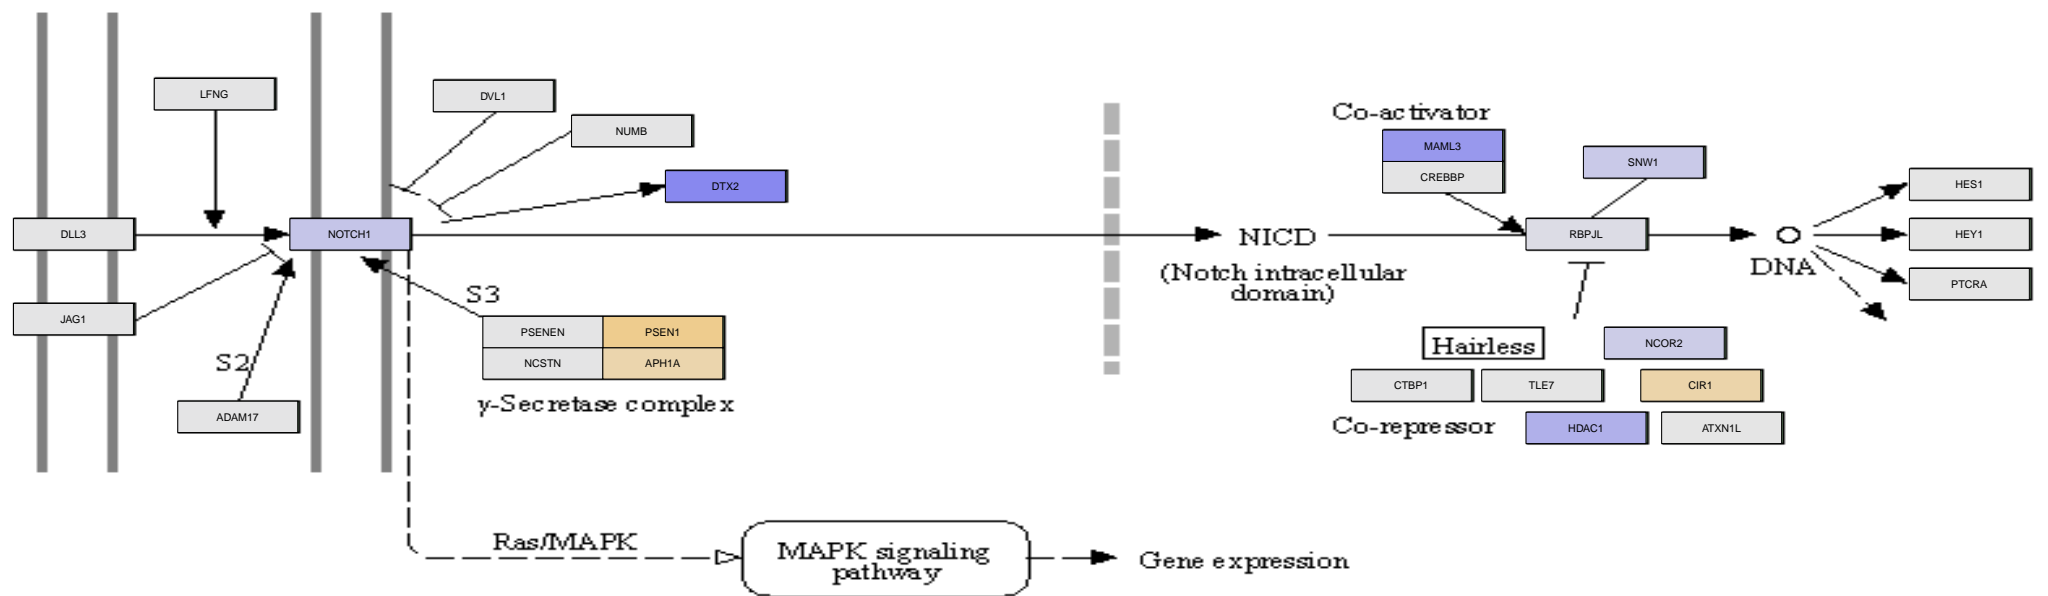



Notch signaling pathway  
Late Adult

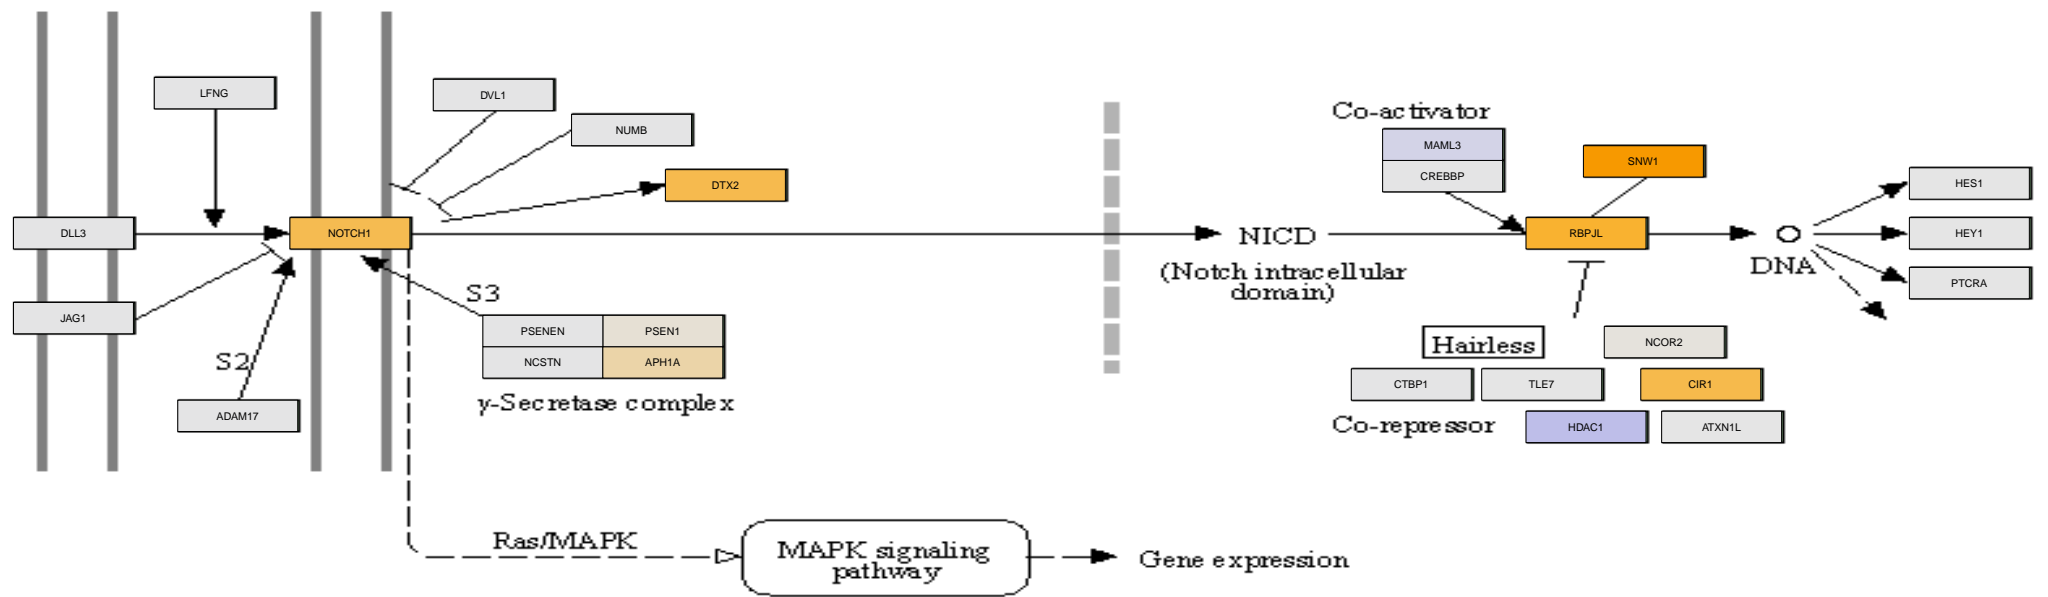

Supplement: s1 [file s1]
