# Supplementary material for: The Transcriptome and Methylome of the Developing and Aging Brain and Their Relations to Gliomas and Psychological Disorders
Source: MDPI journal article supplement (doi:10.3390/cells11030362), 2022-01-21

MAPK signaling pathway

all genes

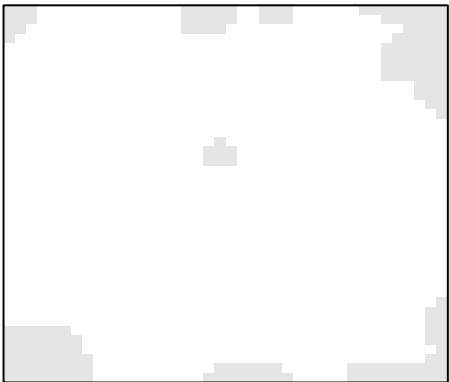

maximum = -Inf

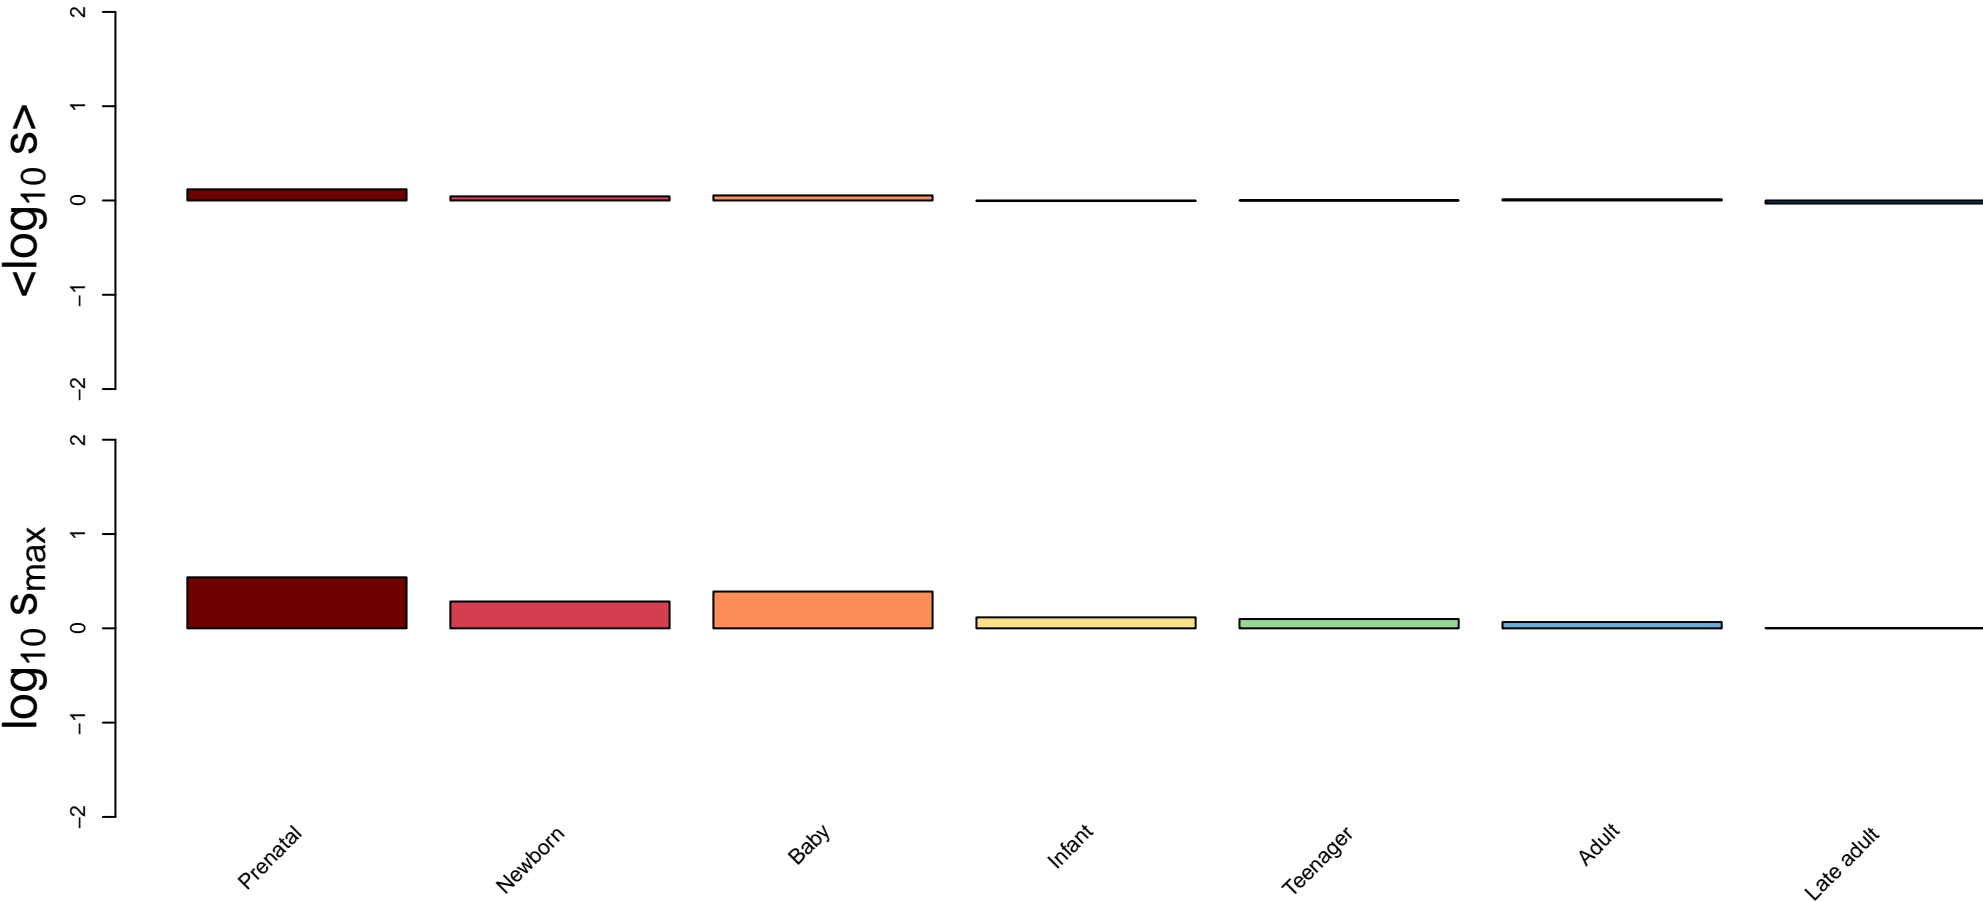

MAPK signaling pathway  
genes with data

Classical MAP kinase  
pathway

JNK and p38 MAP kinase  
pathway

Serum, cytotoxic drugs,  
irradiation, heatshock,  
reactive oxygen species,  
lipopolysaccharide,  
and other stress

ERK5 pathway

Serum, EGF,  
reactive oxygen species,  
or  
Src tyrosinase  
downstream

Phosphatidylinositol  
signaling system

Proliferation,  
inflammation  
anti-apoptosis

Proliferation,  
differentiation

Proliferation,  
differentiation,  
inflammation  
Apoptosis

Proliferation,  
differentiation

Cell  
cycle

MAPKKKK

MAPKKKK

MAPKK

MAPK

Transcription  
factor

DNA

DNA

DNA

p53 signaling  
pathway

Wnt signaling  
pathway



MAPK signaling pathway Prenatal

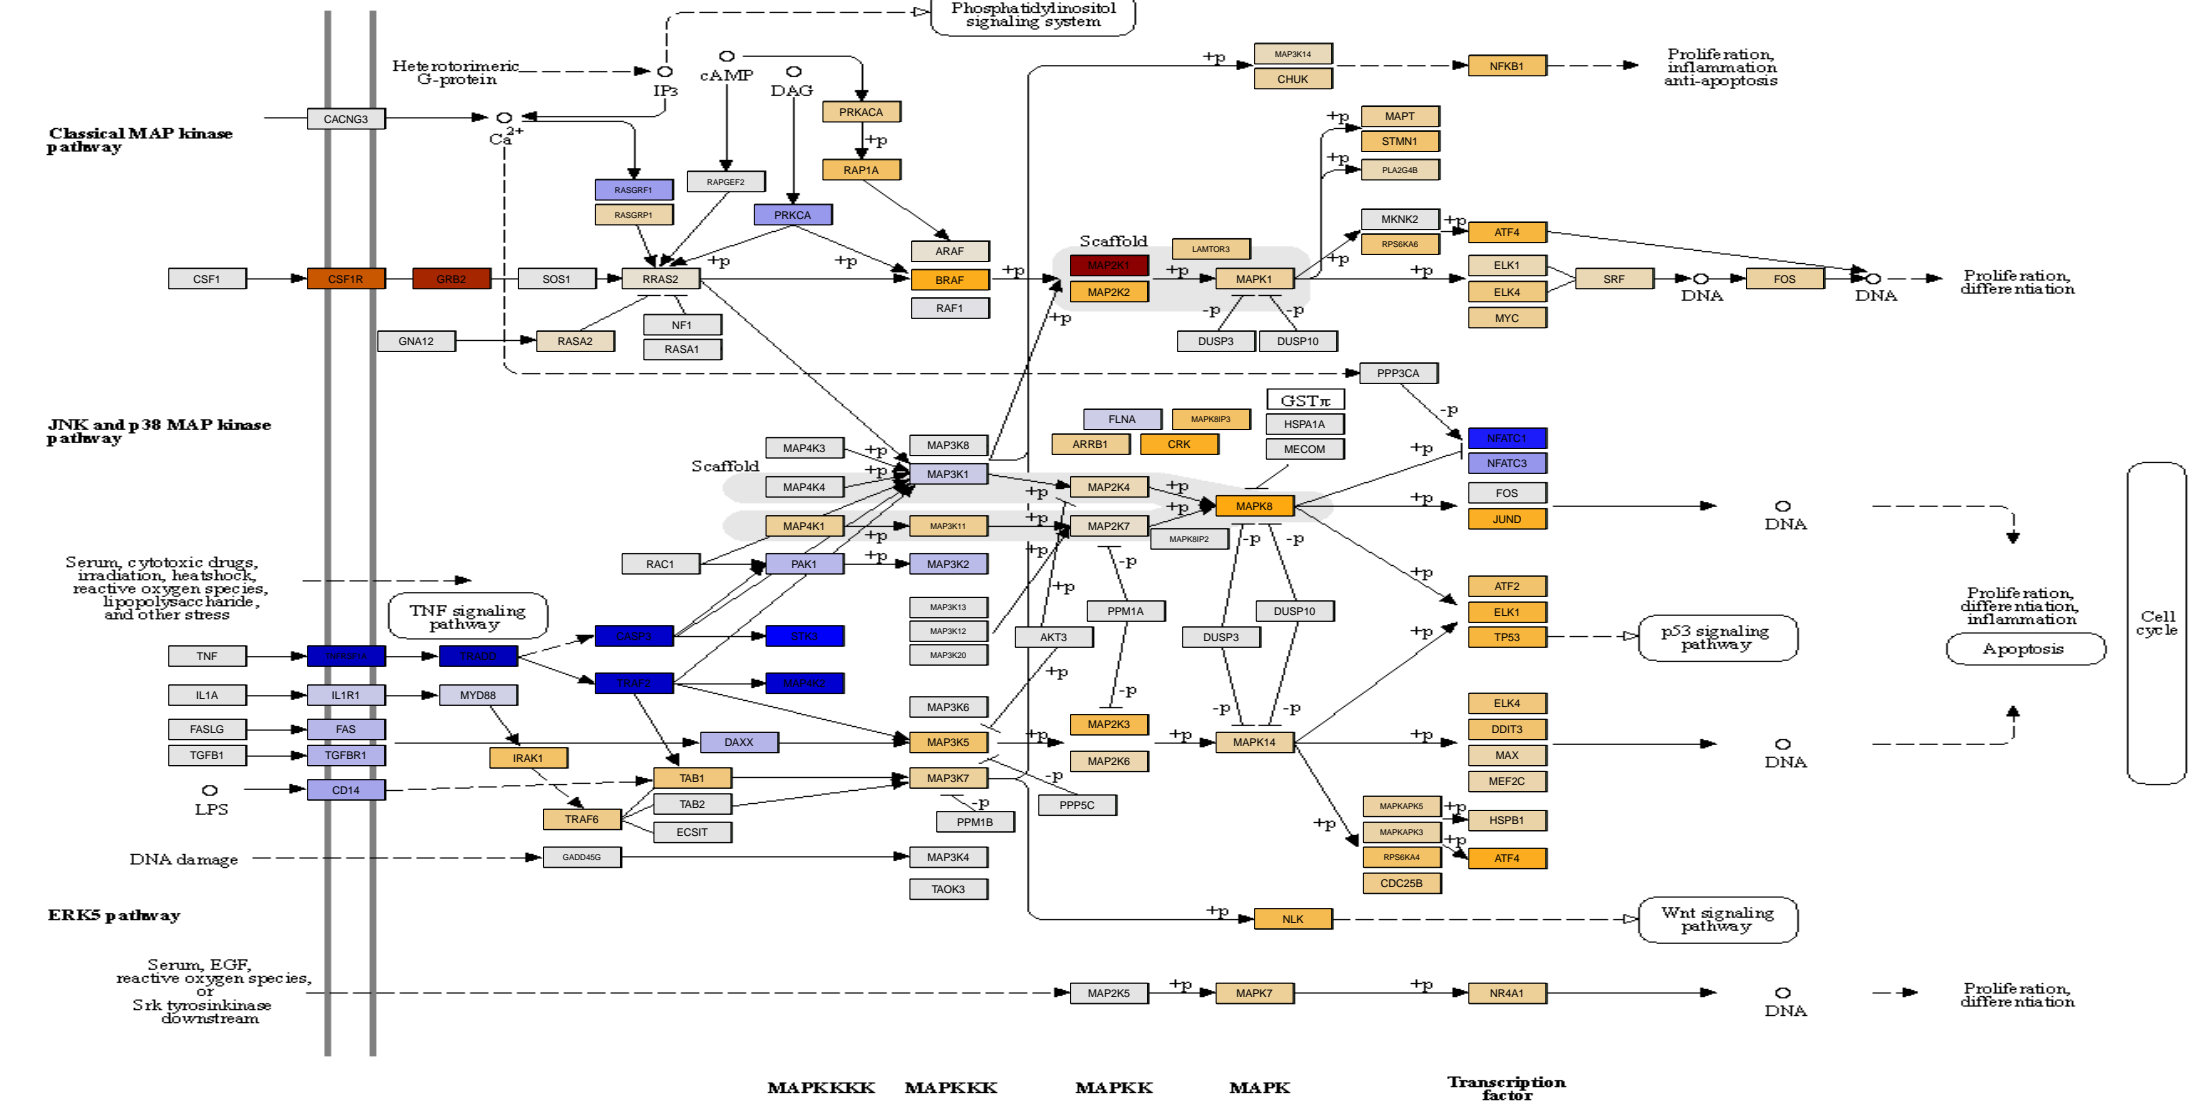

MAPK signaling pathway  
Newborn

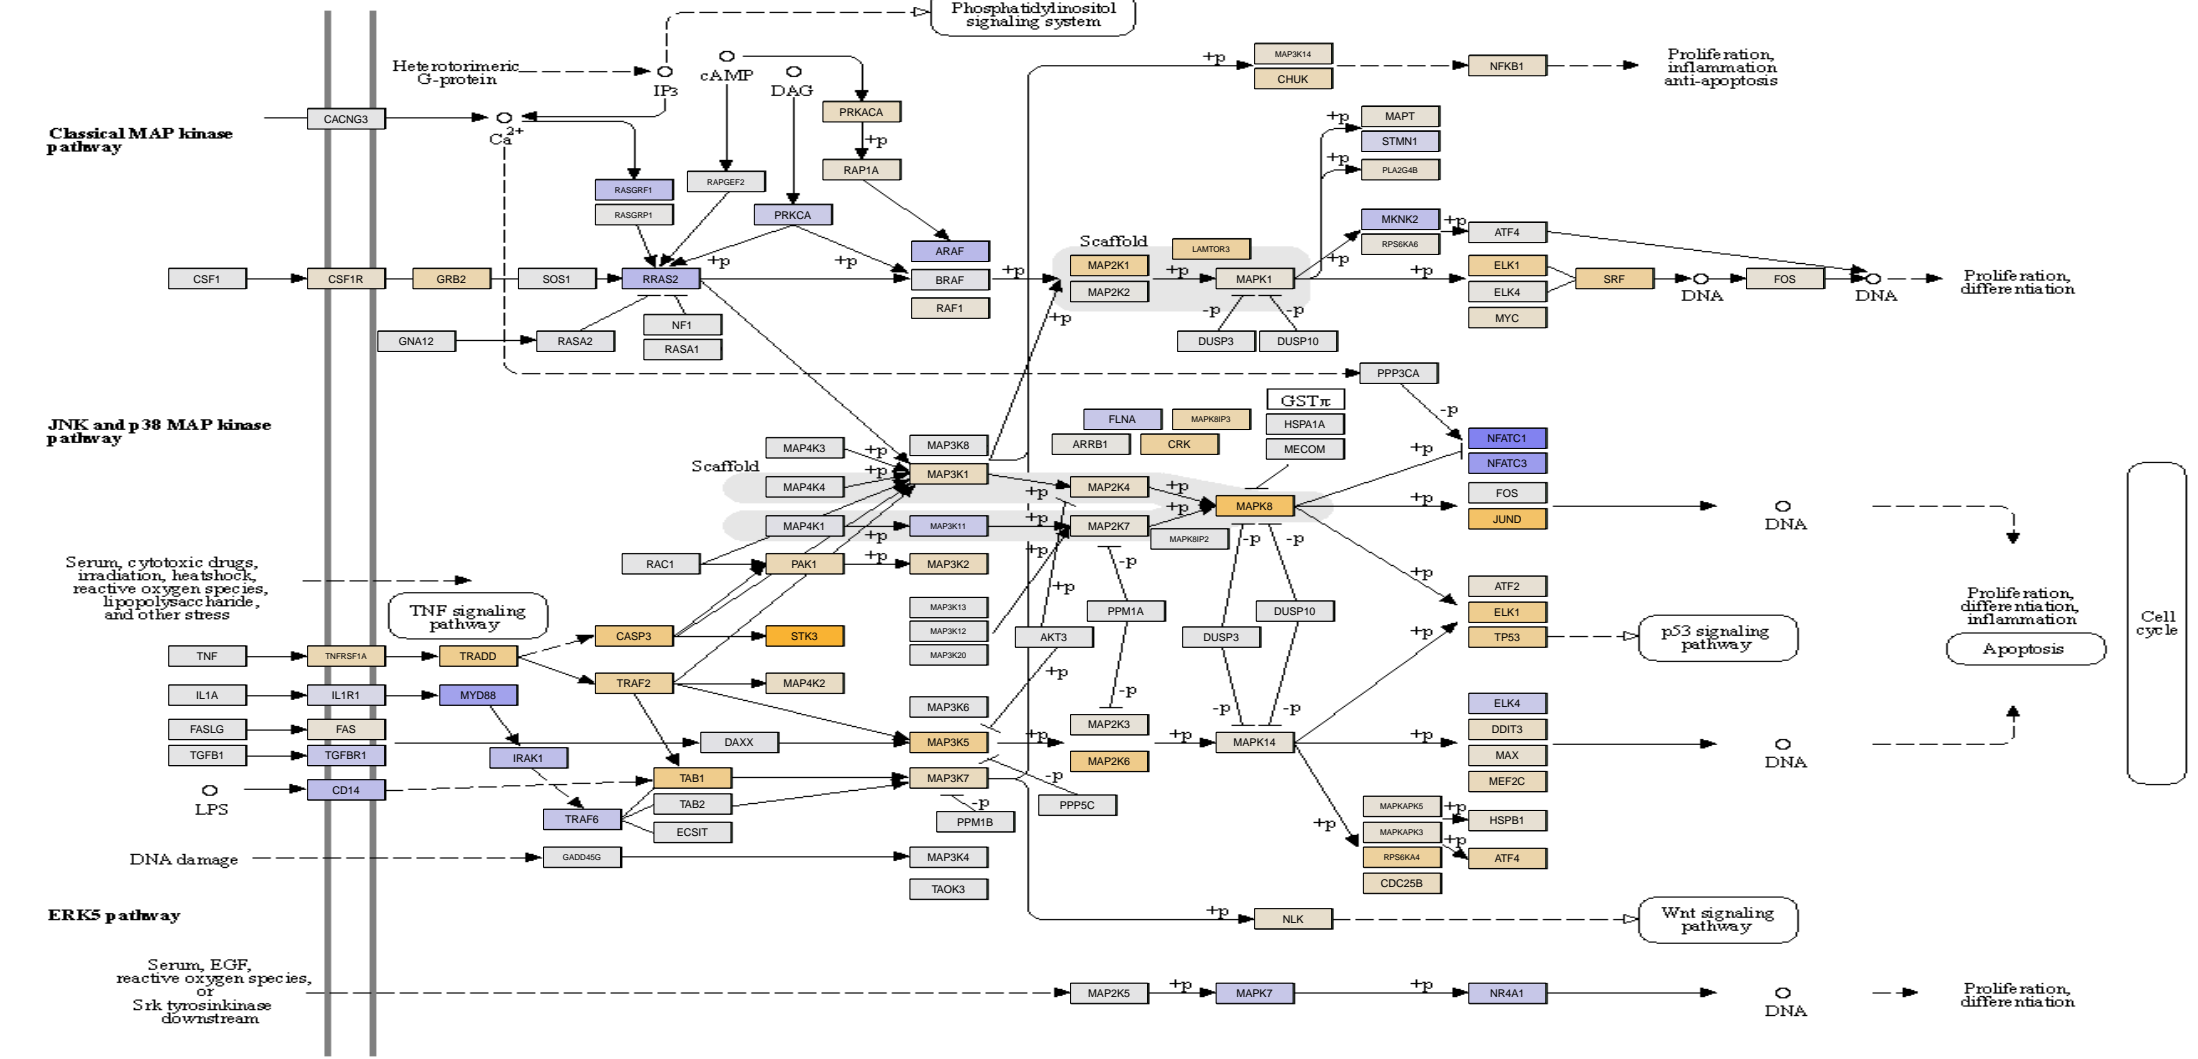



MAPK signaling pathway  
Infant

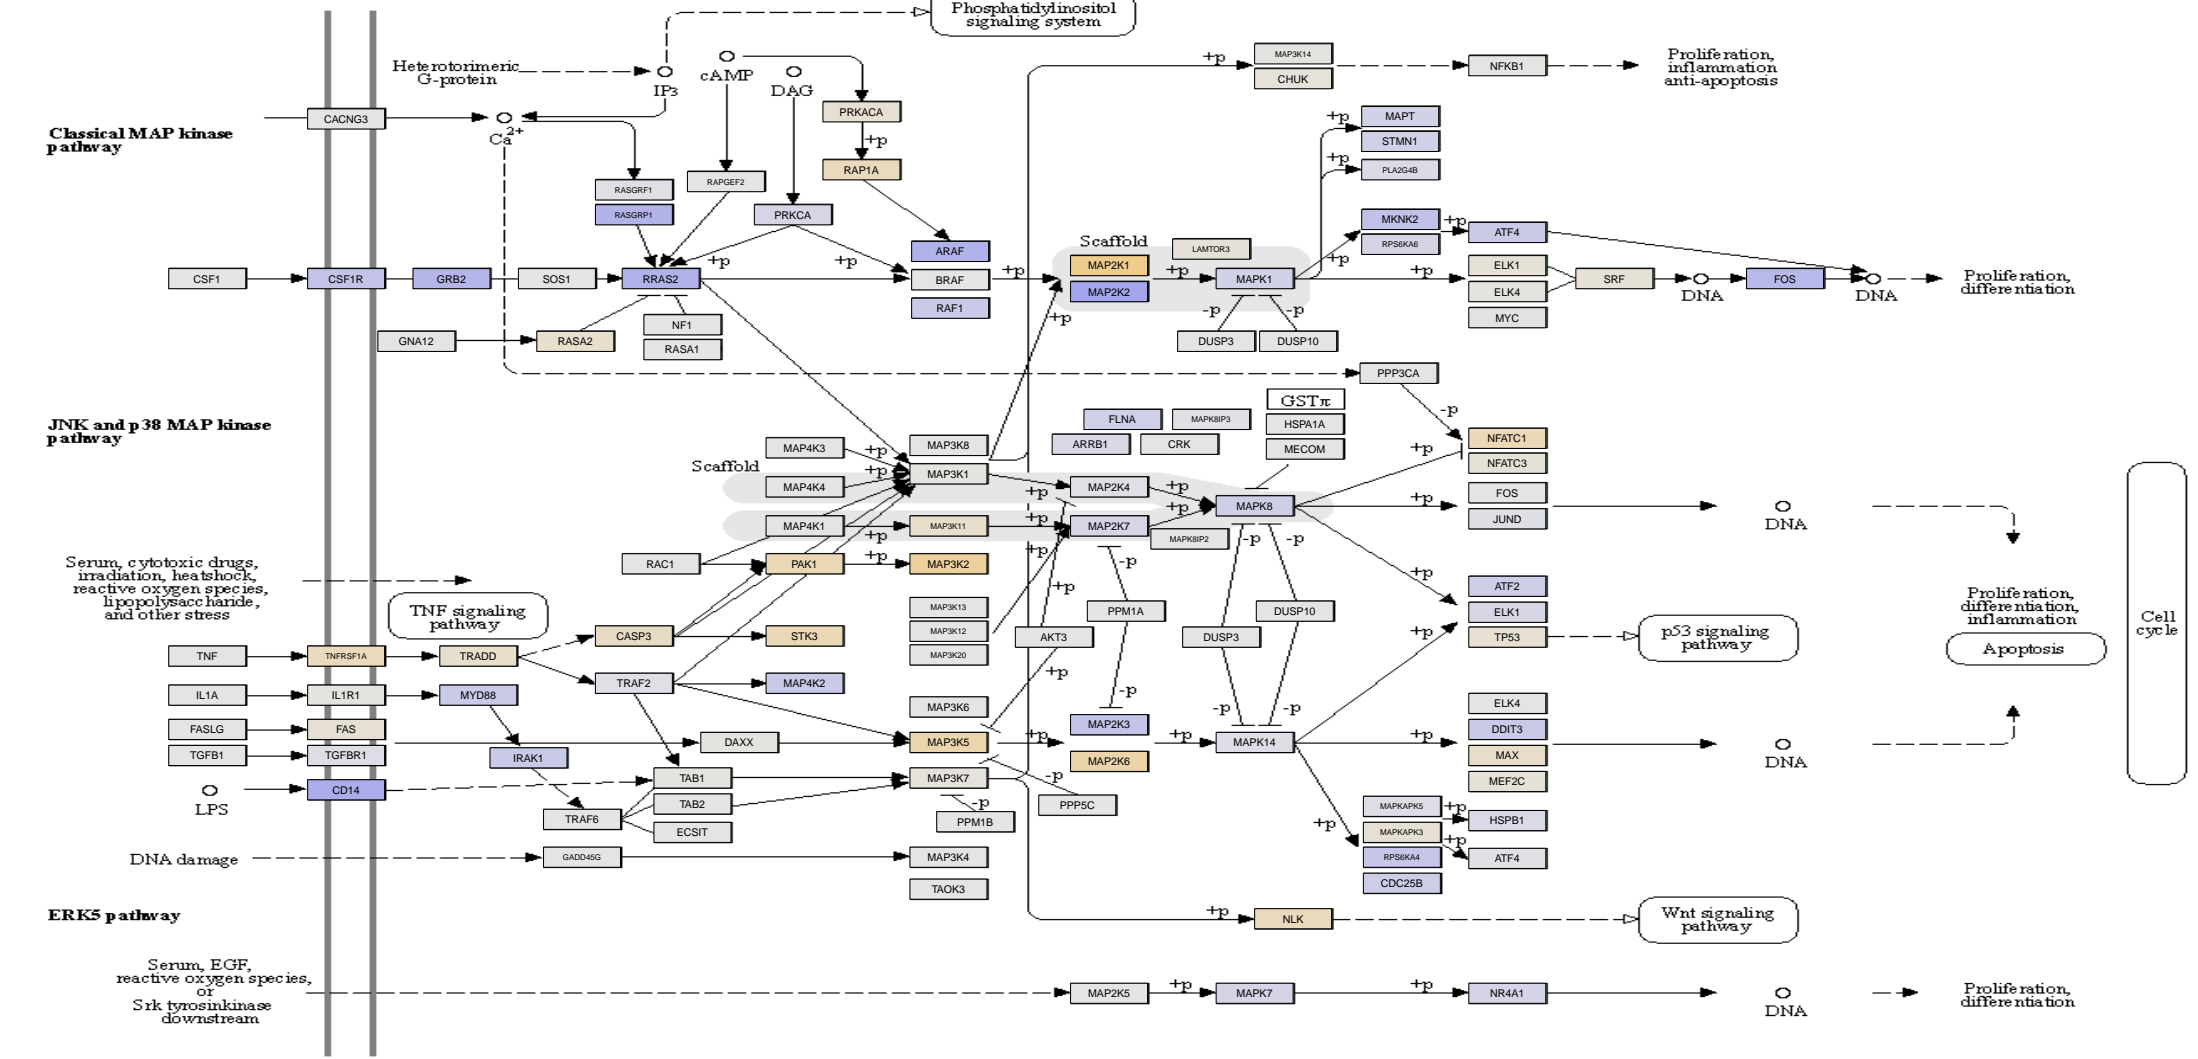

MAPK signaling pathway  
Teenager

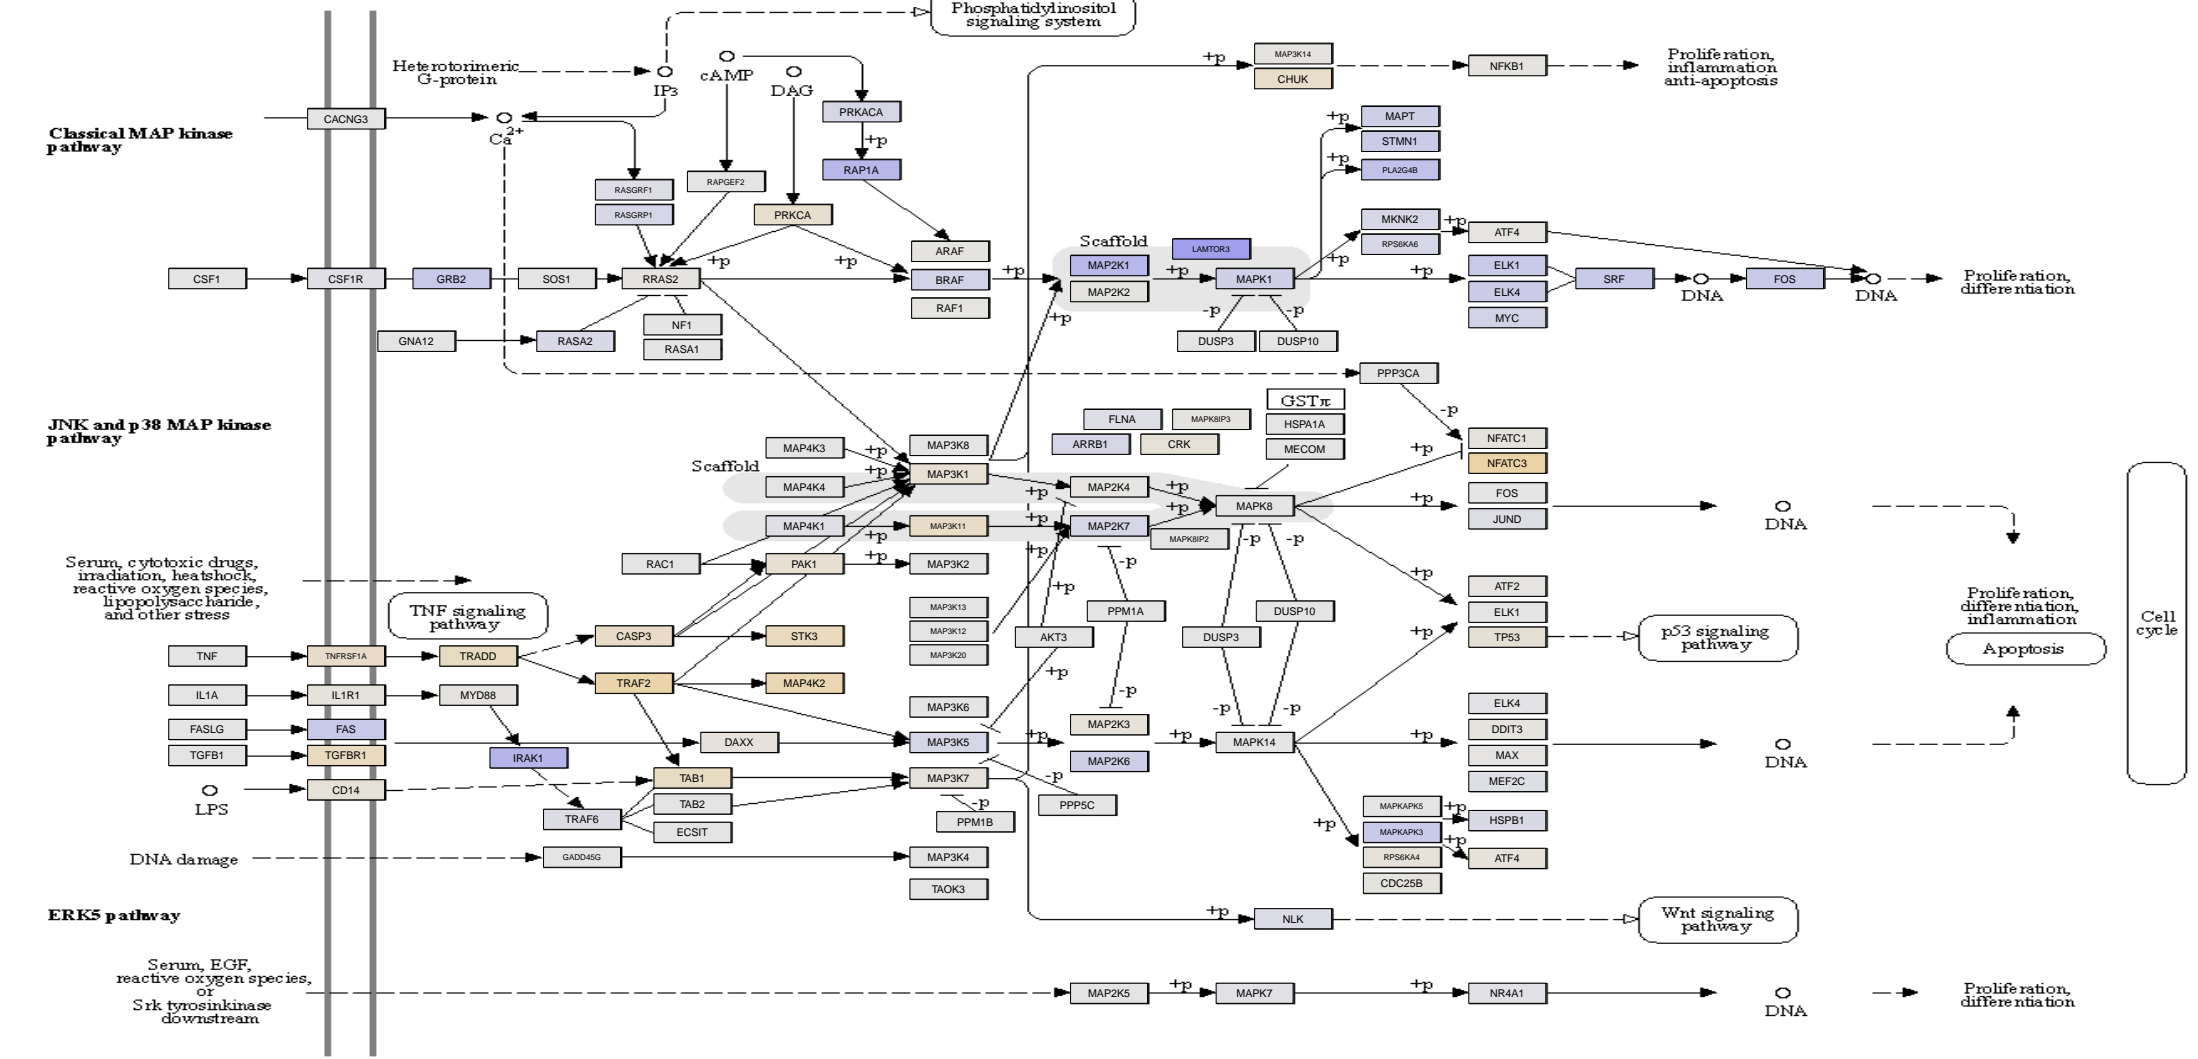

Supplement: s1 [file s1]
