# Supplementary material for: The Transcriptome and Methylome of the Developing and Aging Brain and Their Relations to Gliomas and Psychological Disorders
Source: MDPI journal article supplement (doi:10.3390/cells11030362), 2022-01-21

RIG-I-like receptor signaling pathway

all genes

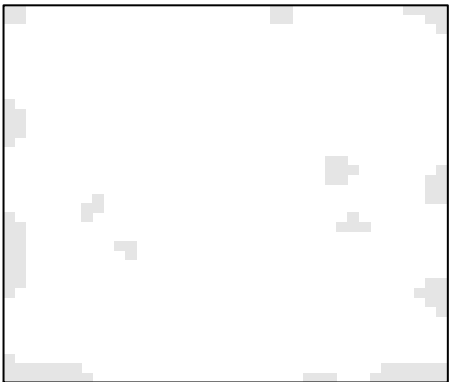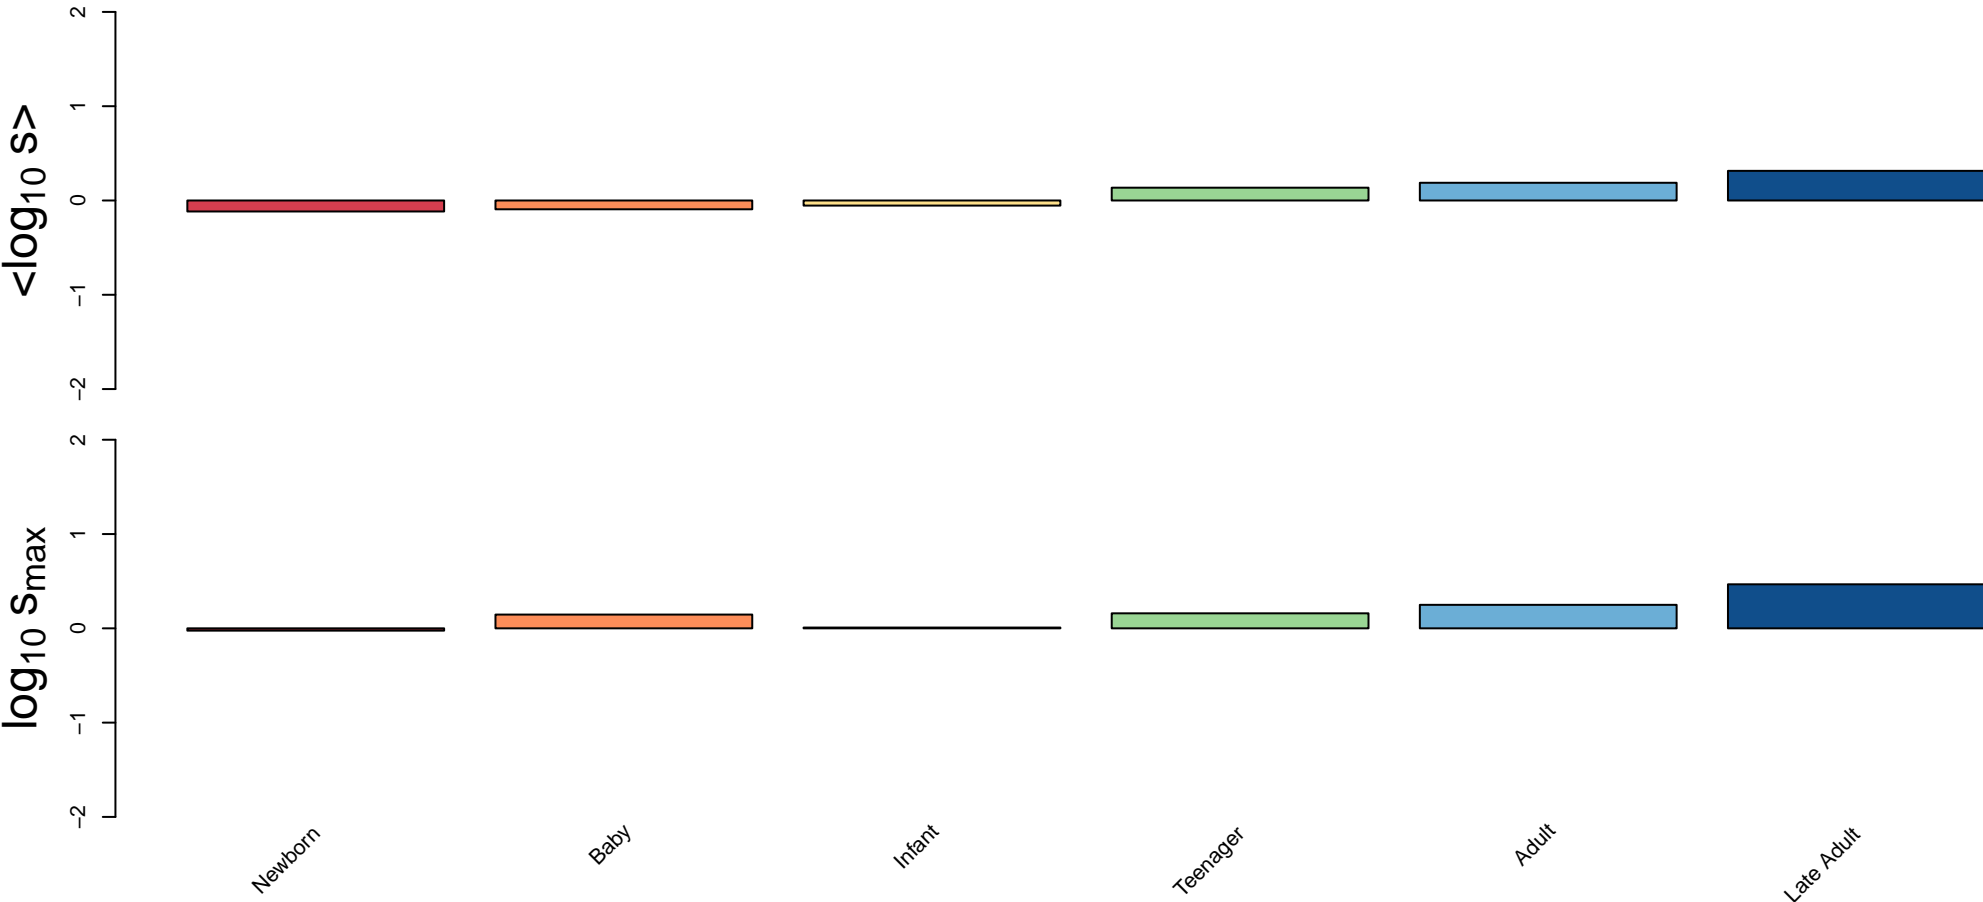



RIG-I like receptor signaling pathway  
sink nodes

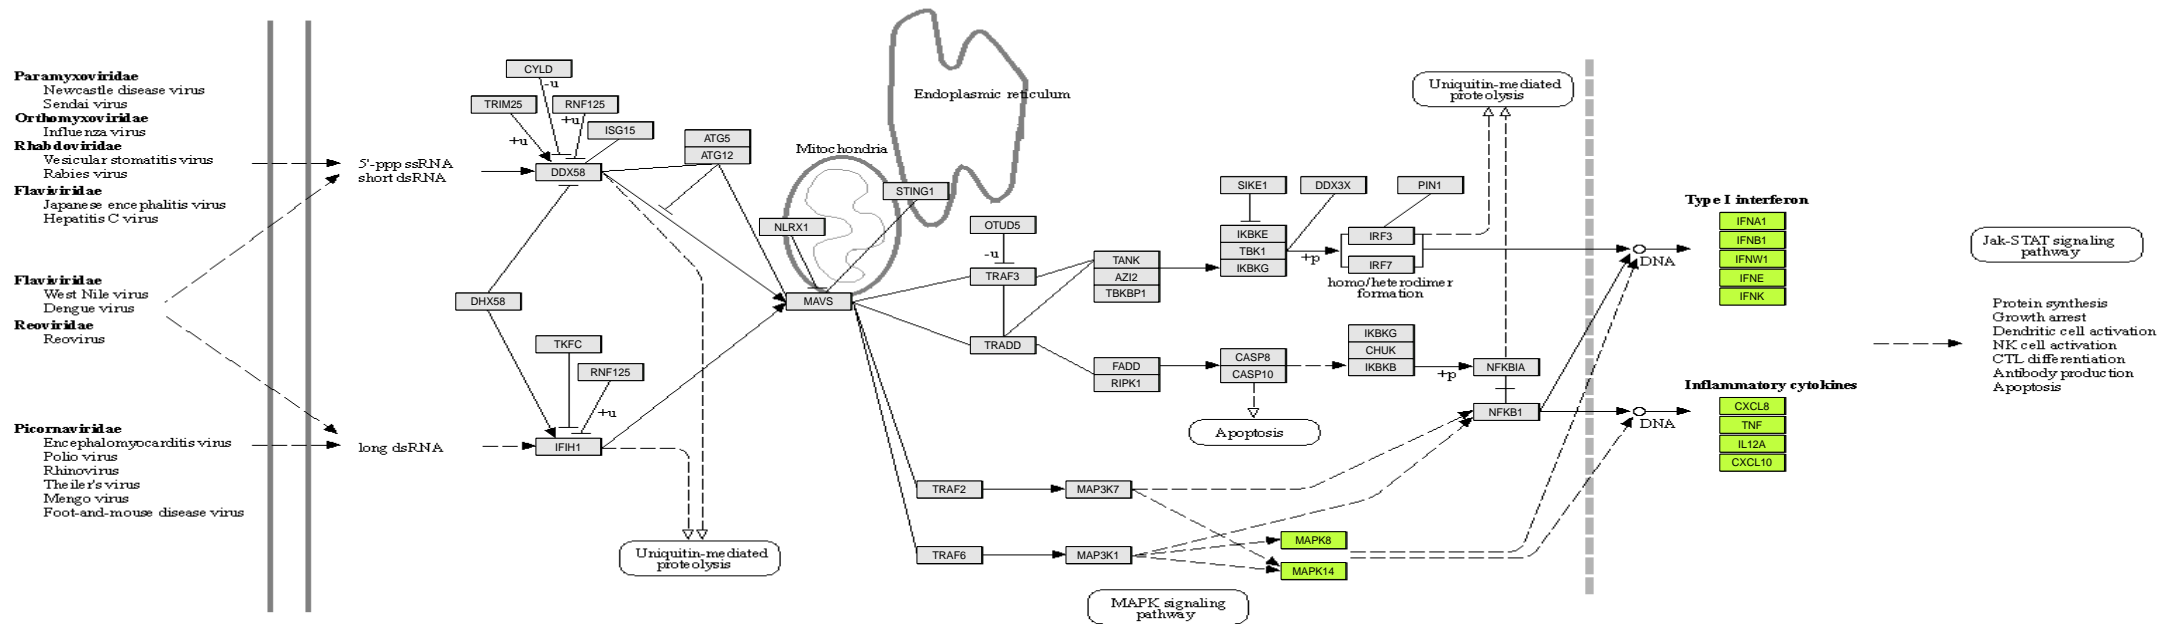

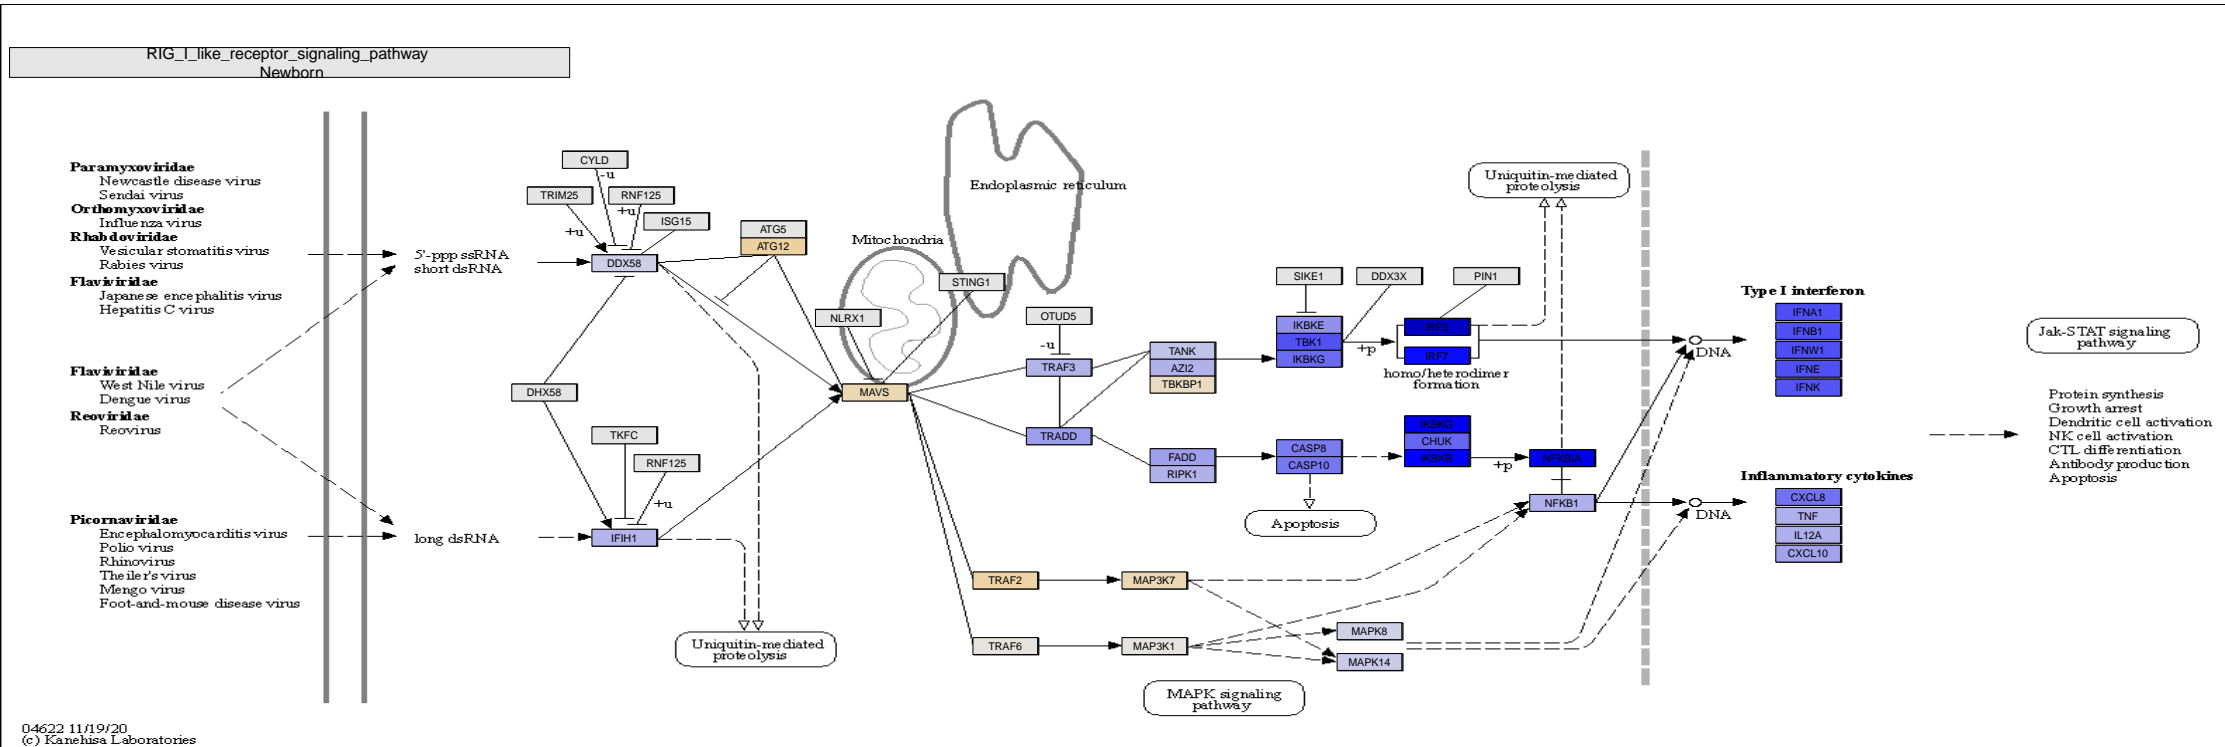





# RIG-I like receptor signaling pathway Teenager

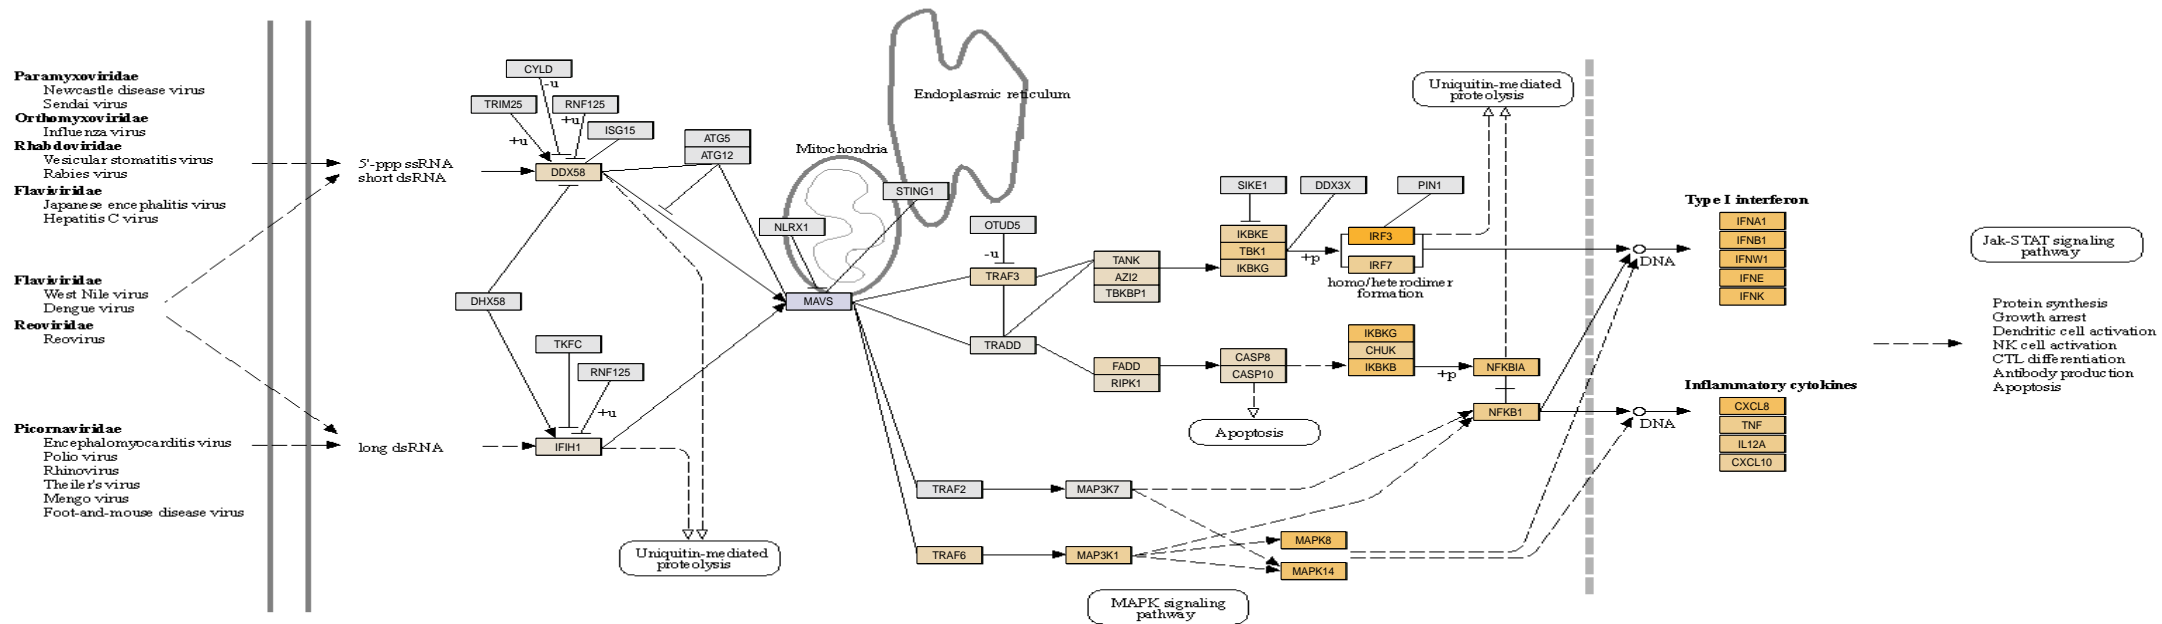

Supplement: s1 [file s1]
