# Supplementary material for: The Transcriptome and Methylome of the Developing and Aging Brain and Their Relations to Gliomas and Psychological Disorders
Source: MDPI journal article supplement (doi:10.3390/cells11030362), 2022-01-21

Fc epsilon RI signaling pathway

all genes

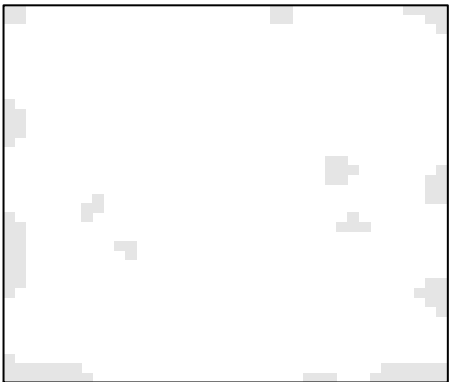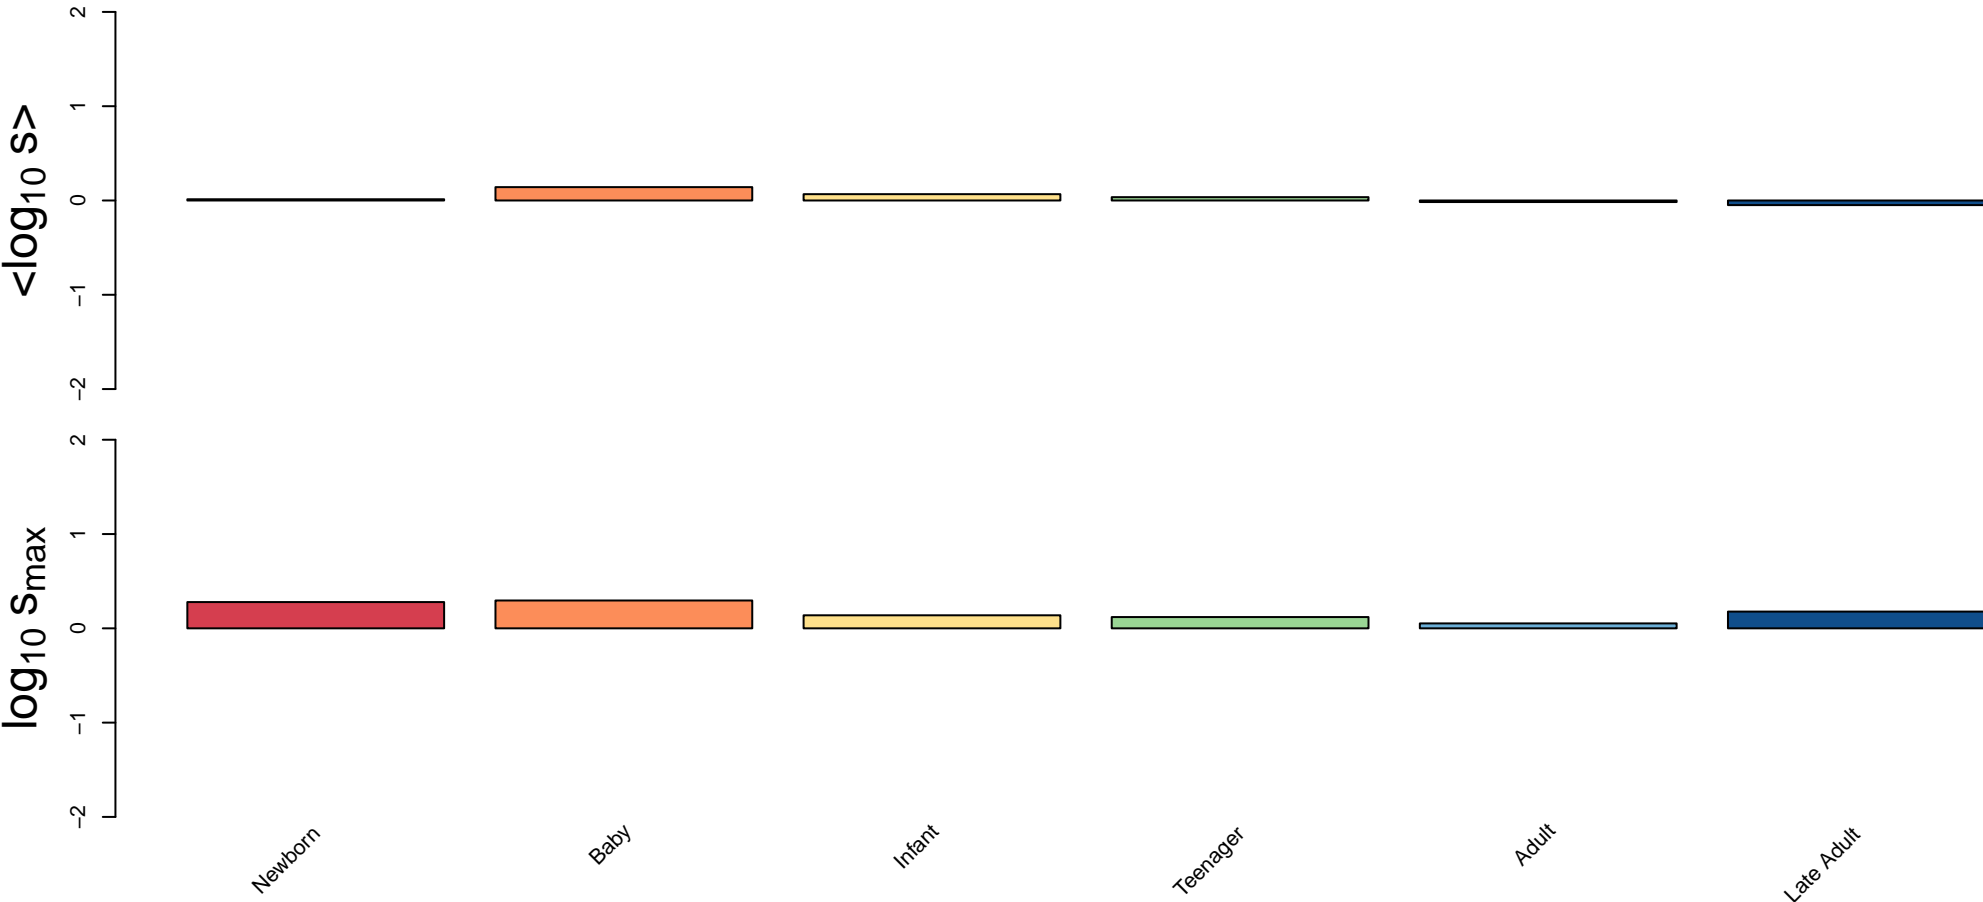

Mast cell

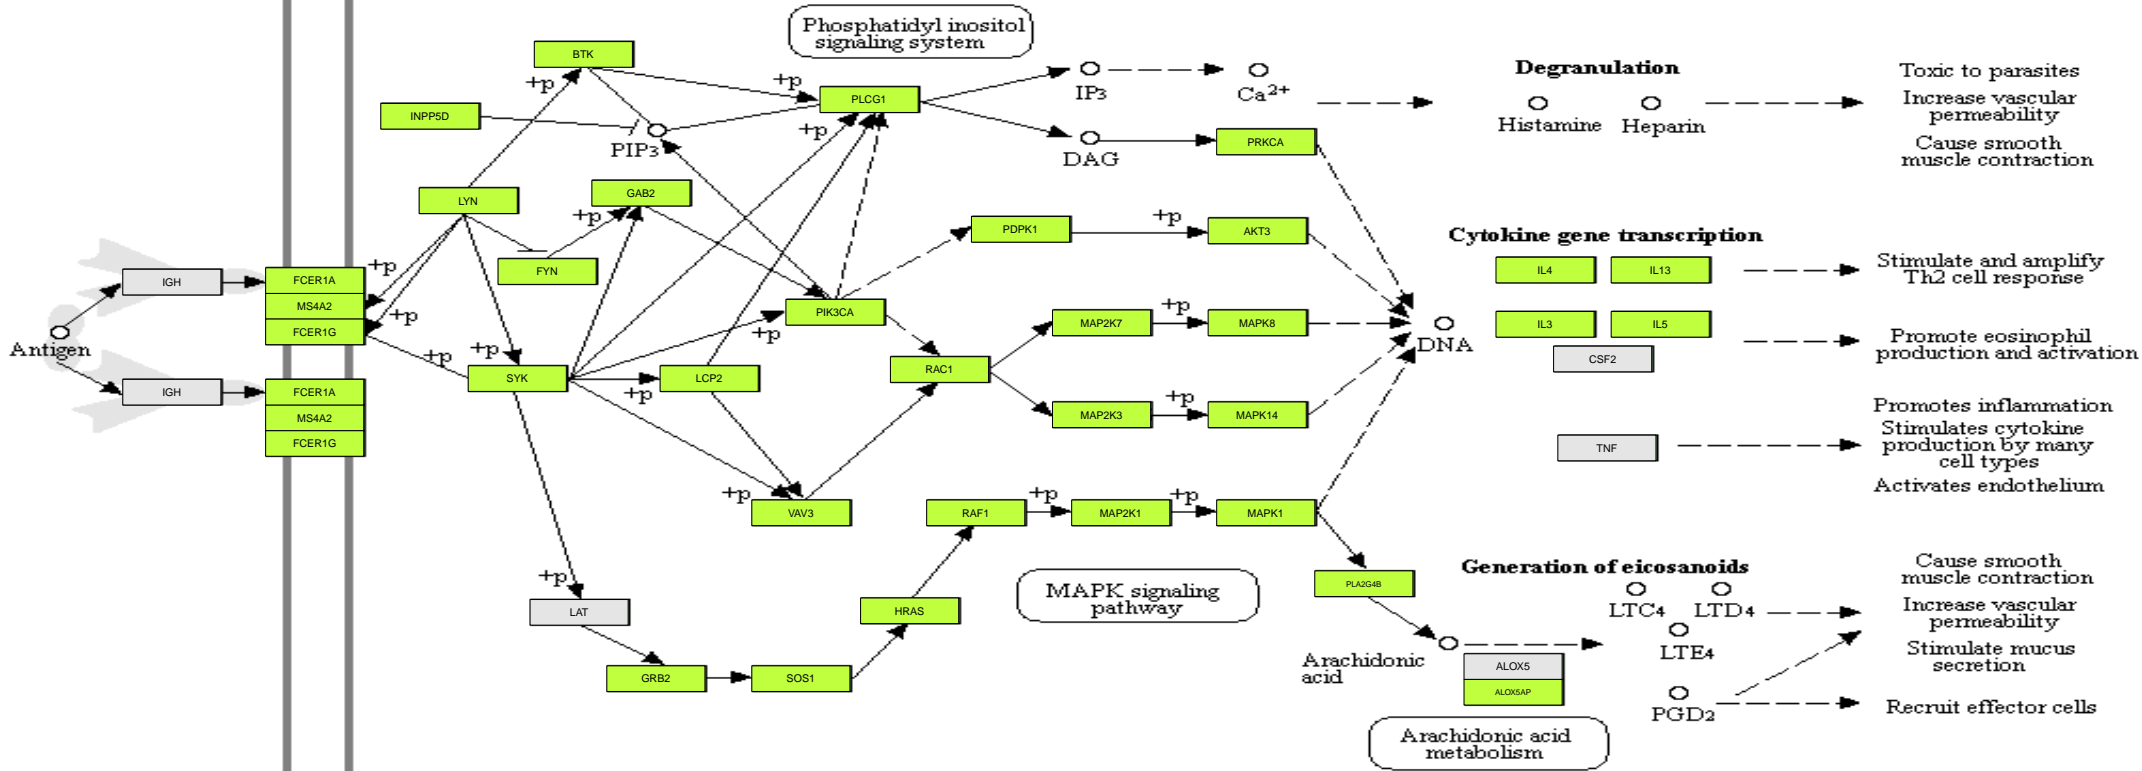

Fc\_epsilon\_R1\_signaling\_pathway  
sink nodes

Mast cell

Phosphatidyl inositol  
signaling system

Degranulation

Cytokine gene transcription

Generation of eicosanoids

MAPK signaling  
pathway

Arachidonic acid  
metabolism

Antigen

Toxic to parasites  
Increase vascular permeability  
Cause smooth muscle contraction

Stimulate and amplify Th2 cell response

Promote eosinophil production and activation

Promotes inflammation  
Stimulates cytokine production by many cell types  
Activates endothelium

Cause smooth muscle contraction  
Increase vascular permeability  
Stimulate mucus secretion

Recruit effector cells

Fc\_epsilon\_R1\_signaling\_pathway  
Newborn

Mast cell

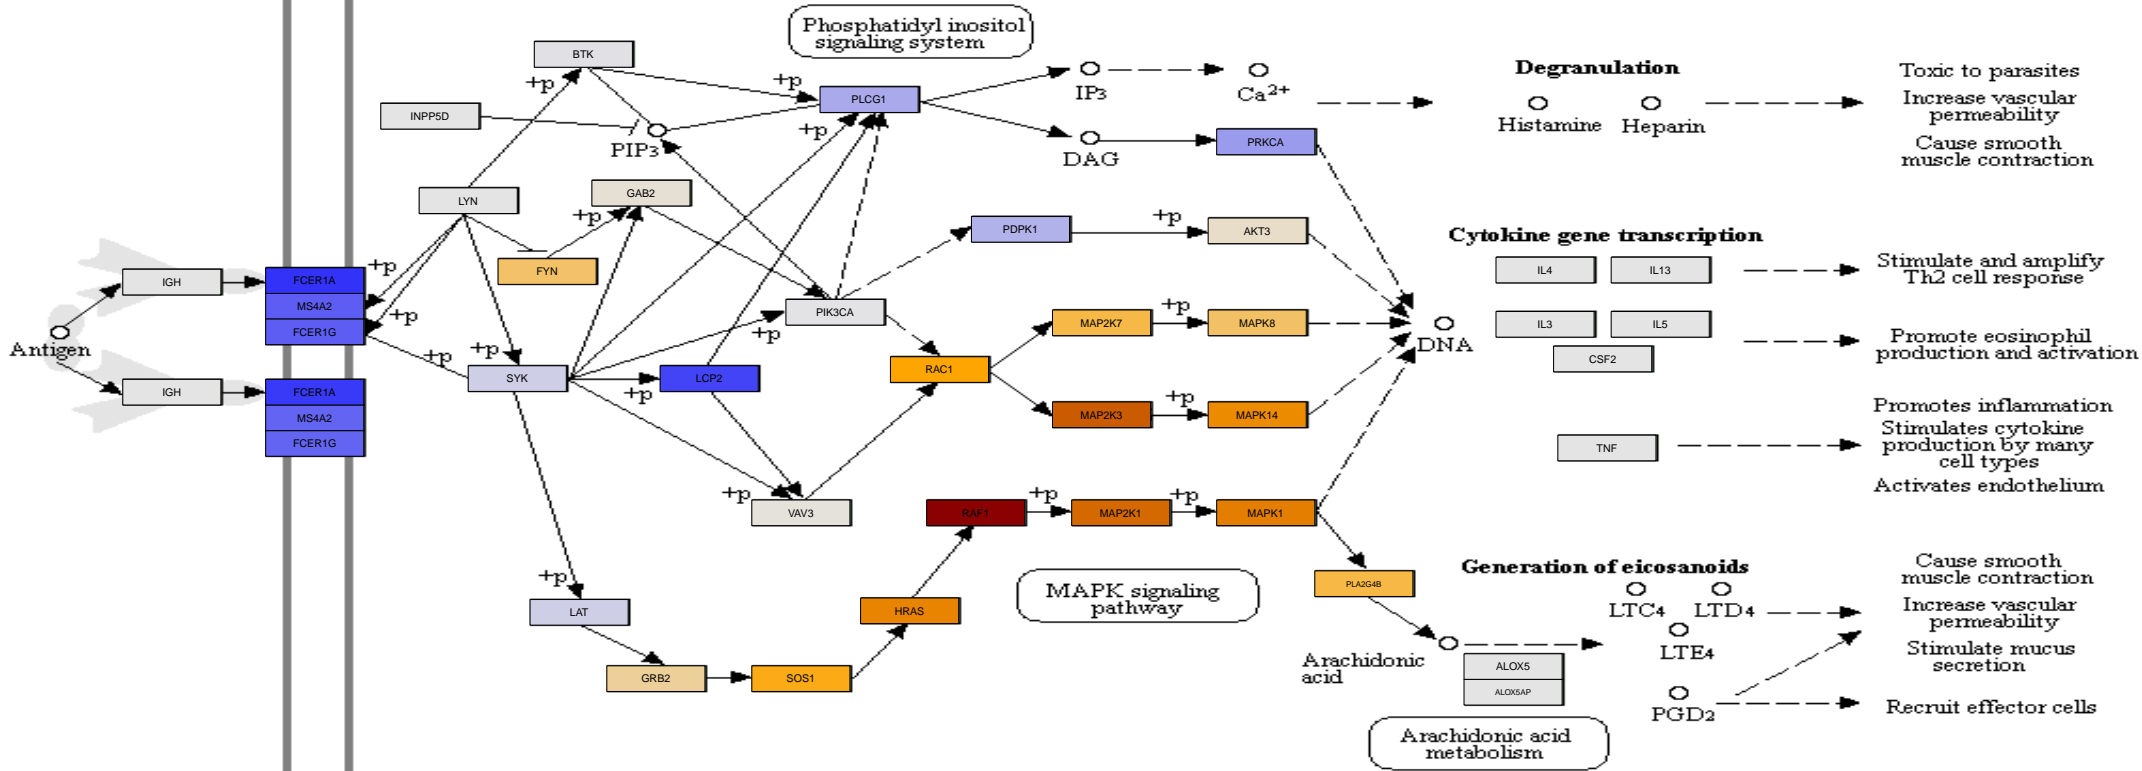

Fc\_epsilon\_R1\_signaling\_pathway  
Baby

Mast cell

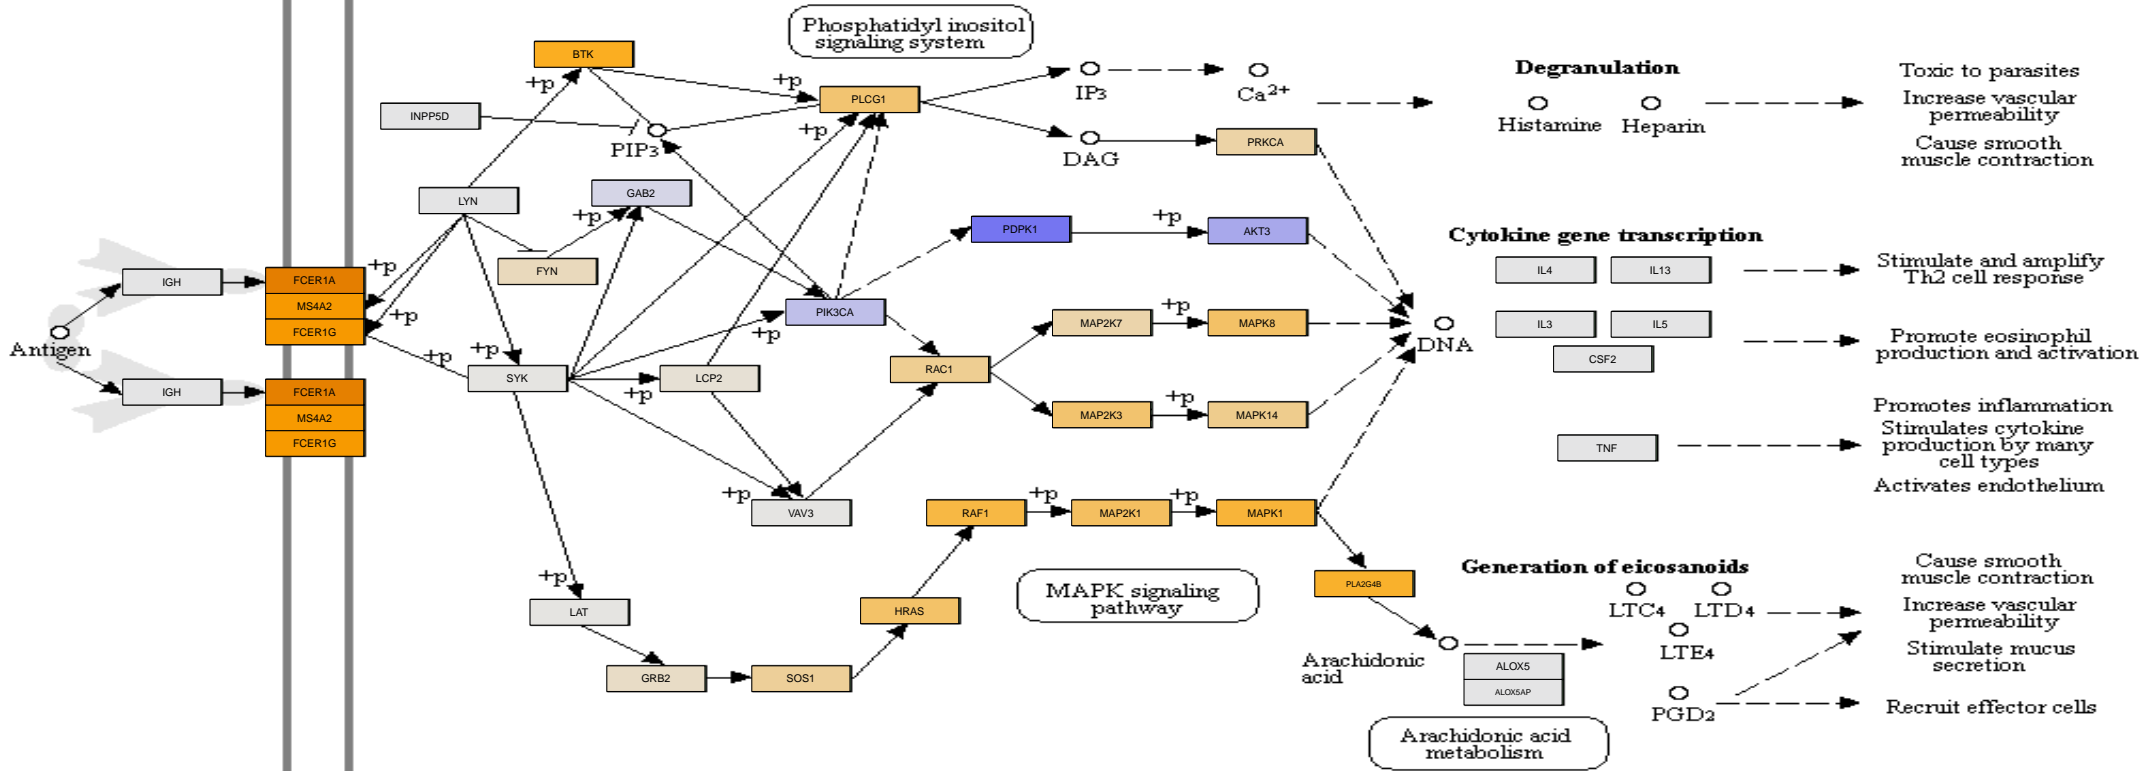

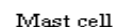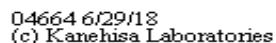

Mast cell

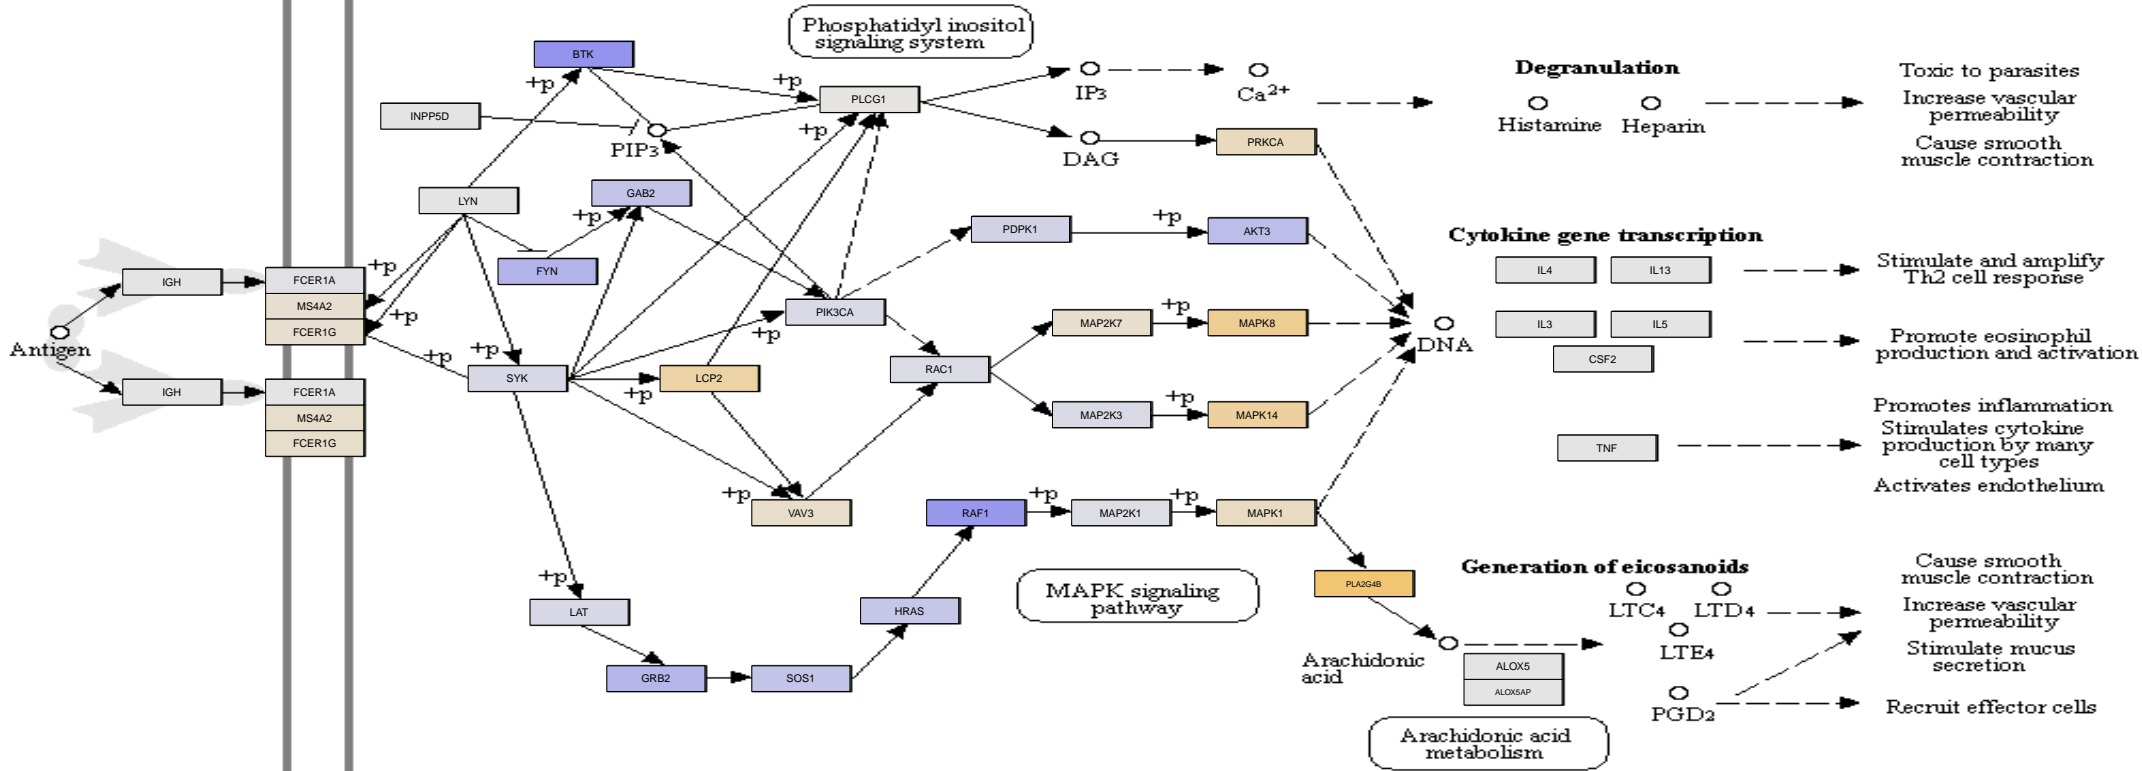

Fc\_epsilon\_R1\_signaling\_pathway  
Adult

Mast cell

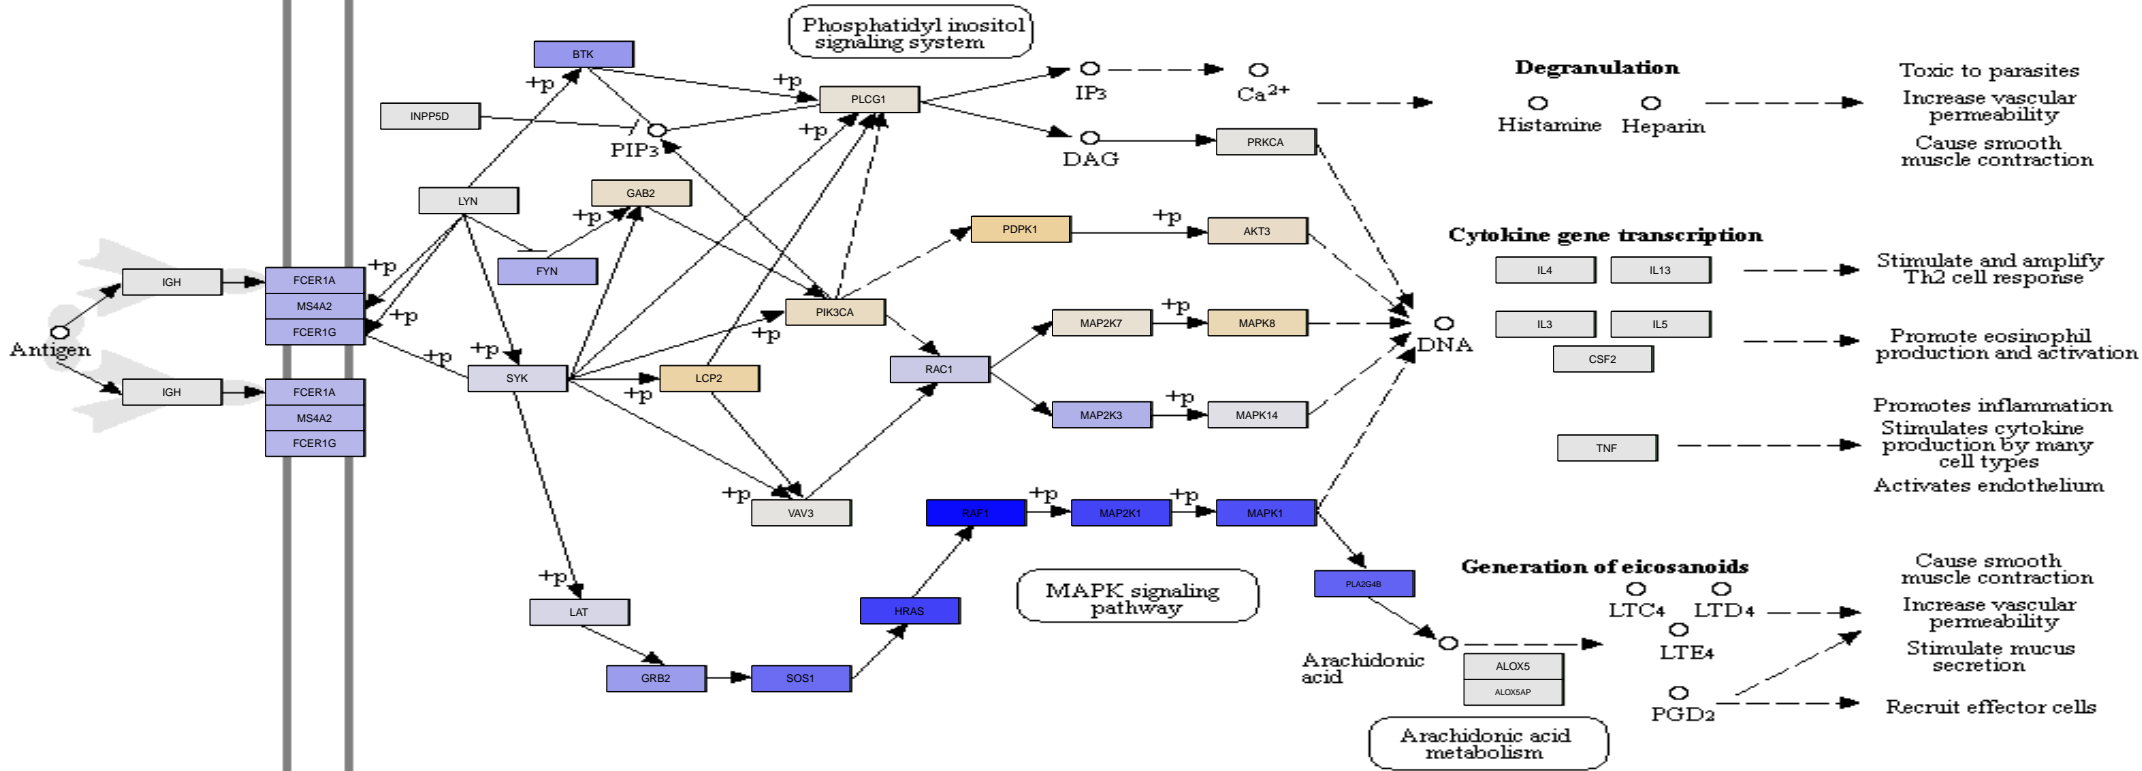



Fc\_epsilon\_R1\_signaling\_pathway  
Late Adult

Mast cell

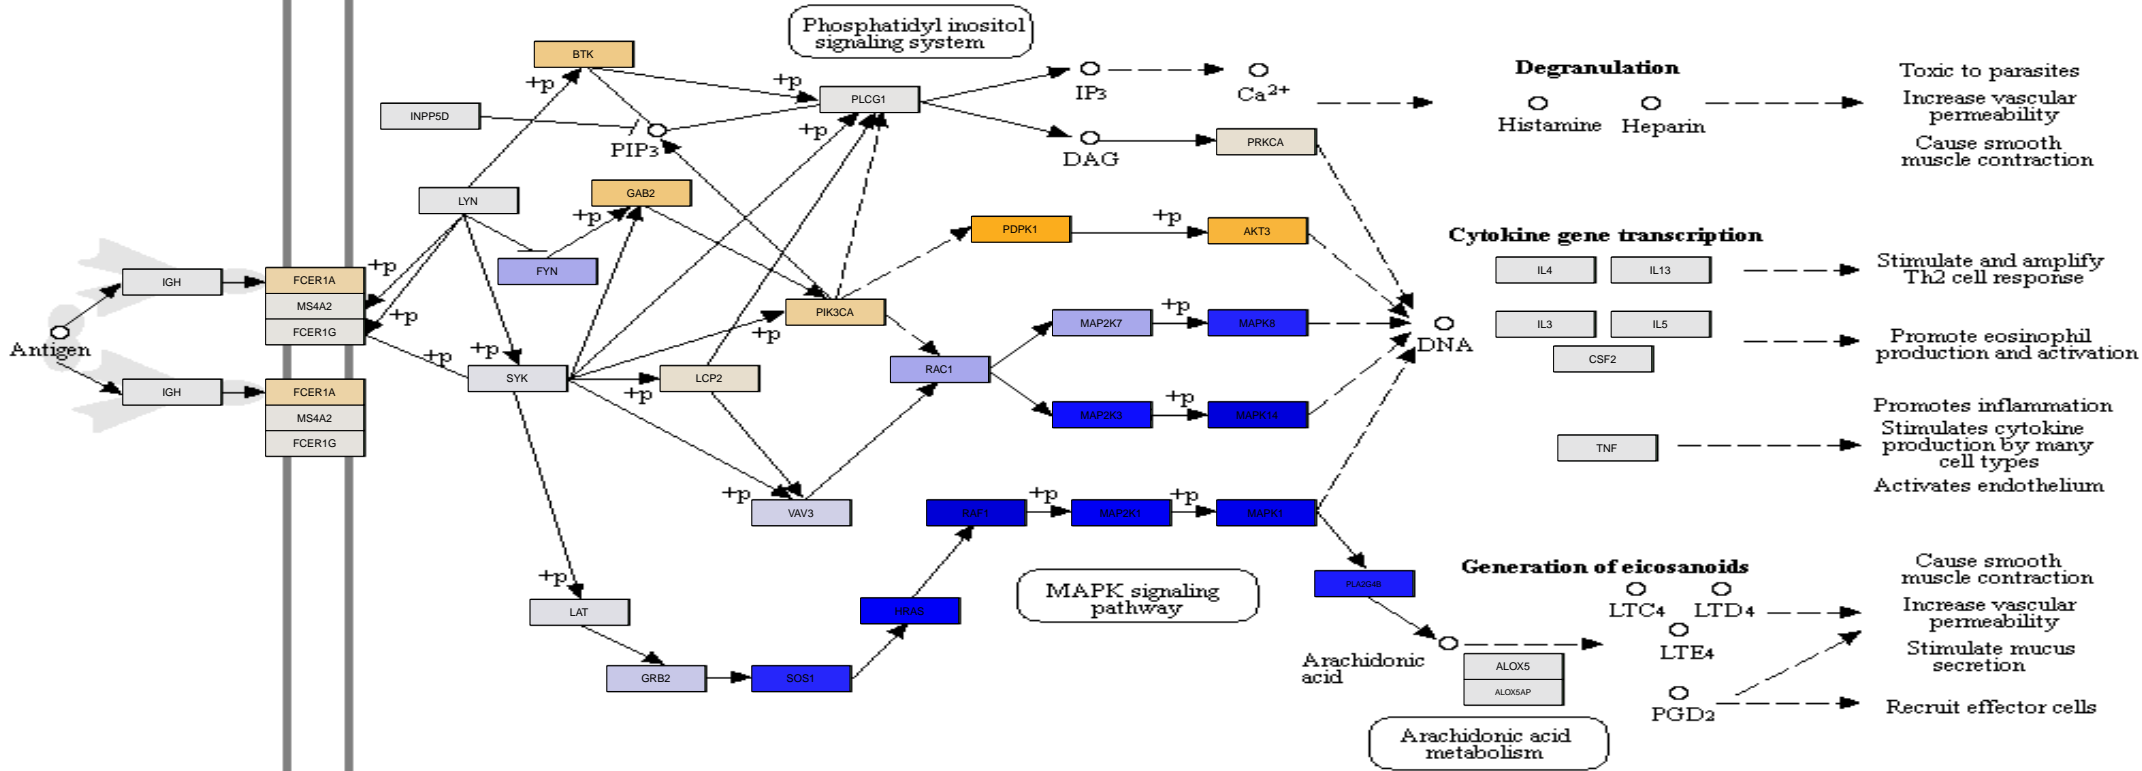

Supplement: s1 [file s1]
