# Supplementary material for: The Transcriptome and Methylome of the Developing and Aging Brain and Their Relations to Gliomas and Psychological Disorders
Source: MDPI journal article supplement (doi:10.3390/cells11030362), 2022-01-21

ErbB signaling pathway

all genes

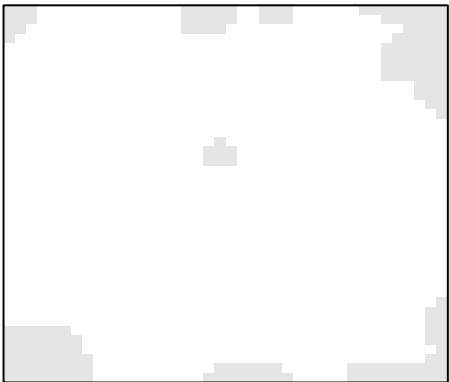

maximum = -Inf

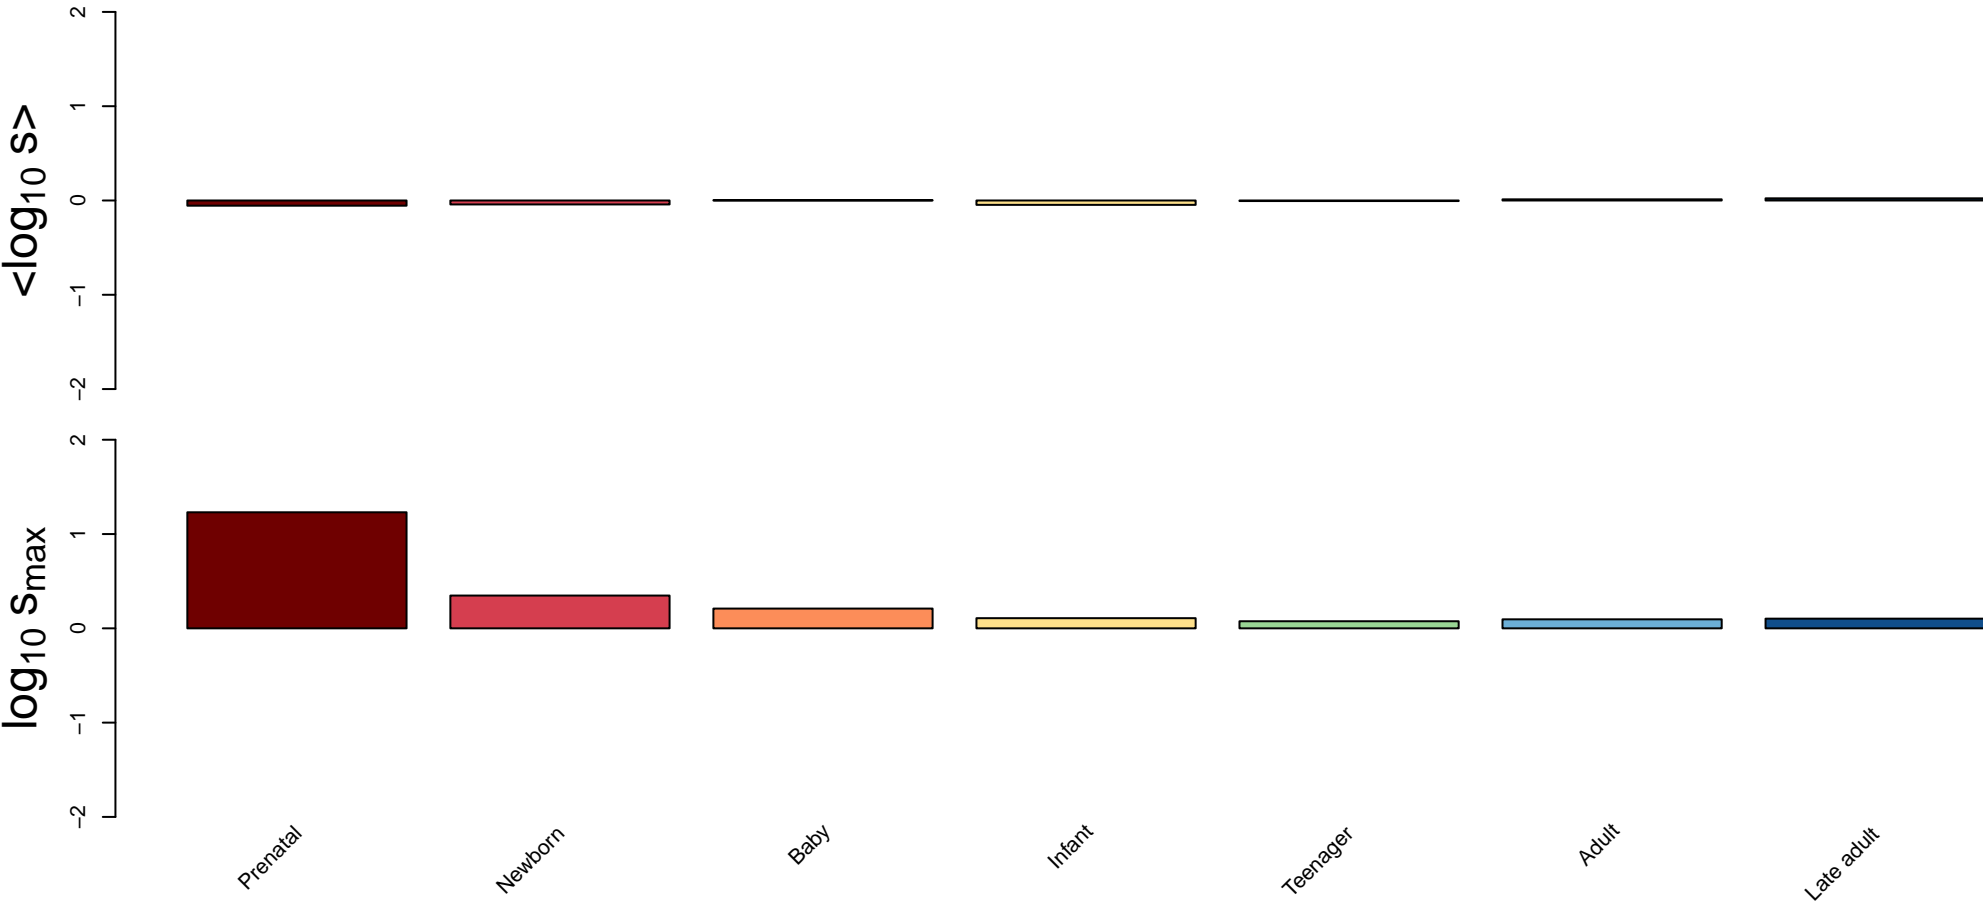

ErbB\_signaling\_pathway  
genes with data

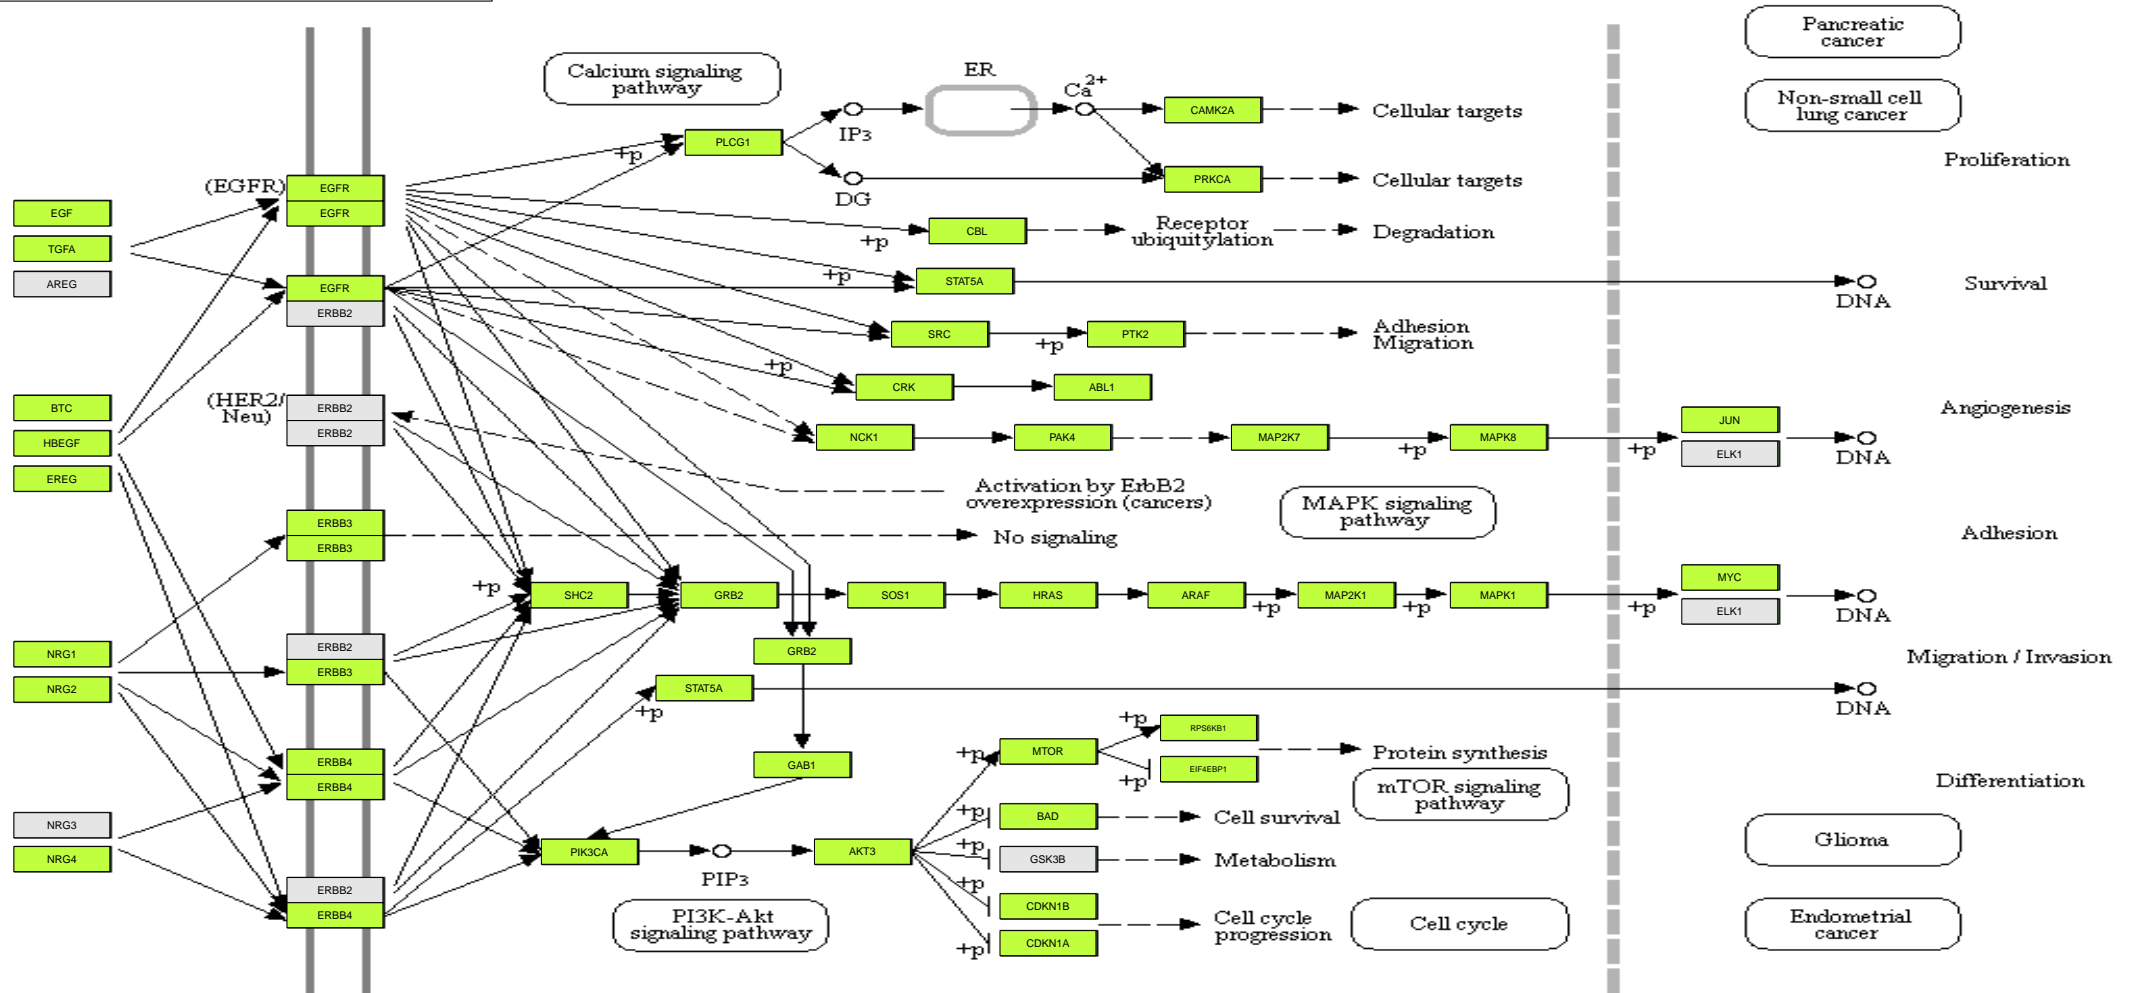

ErbB\_signaling\_pathway  
sink nodes

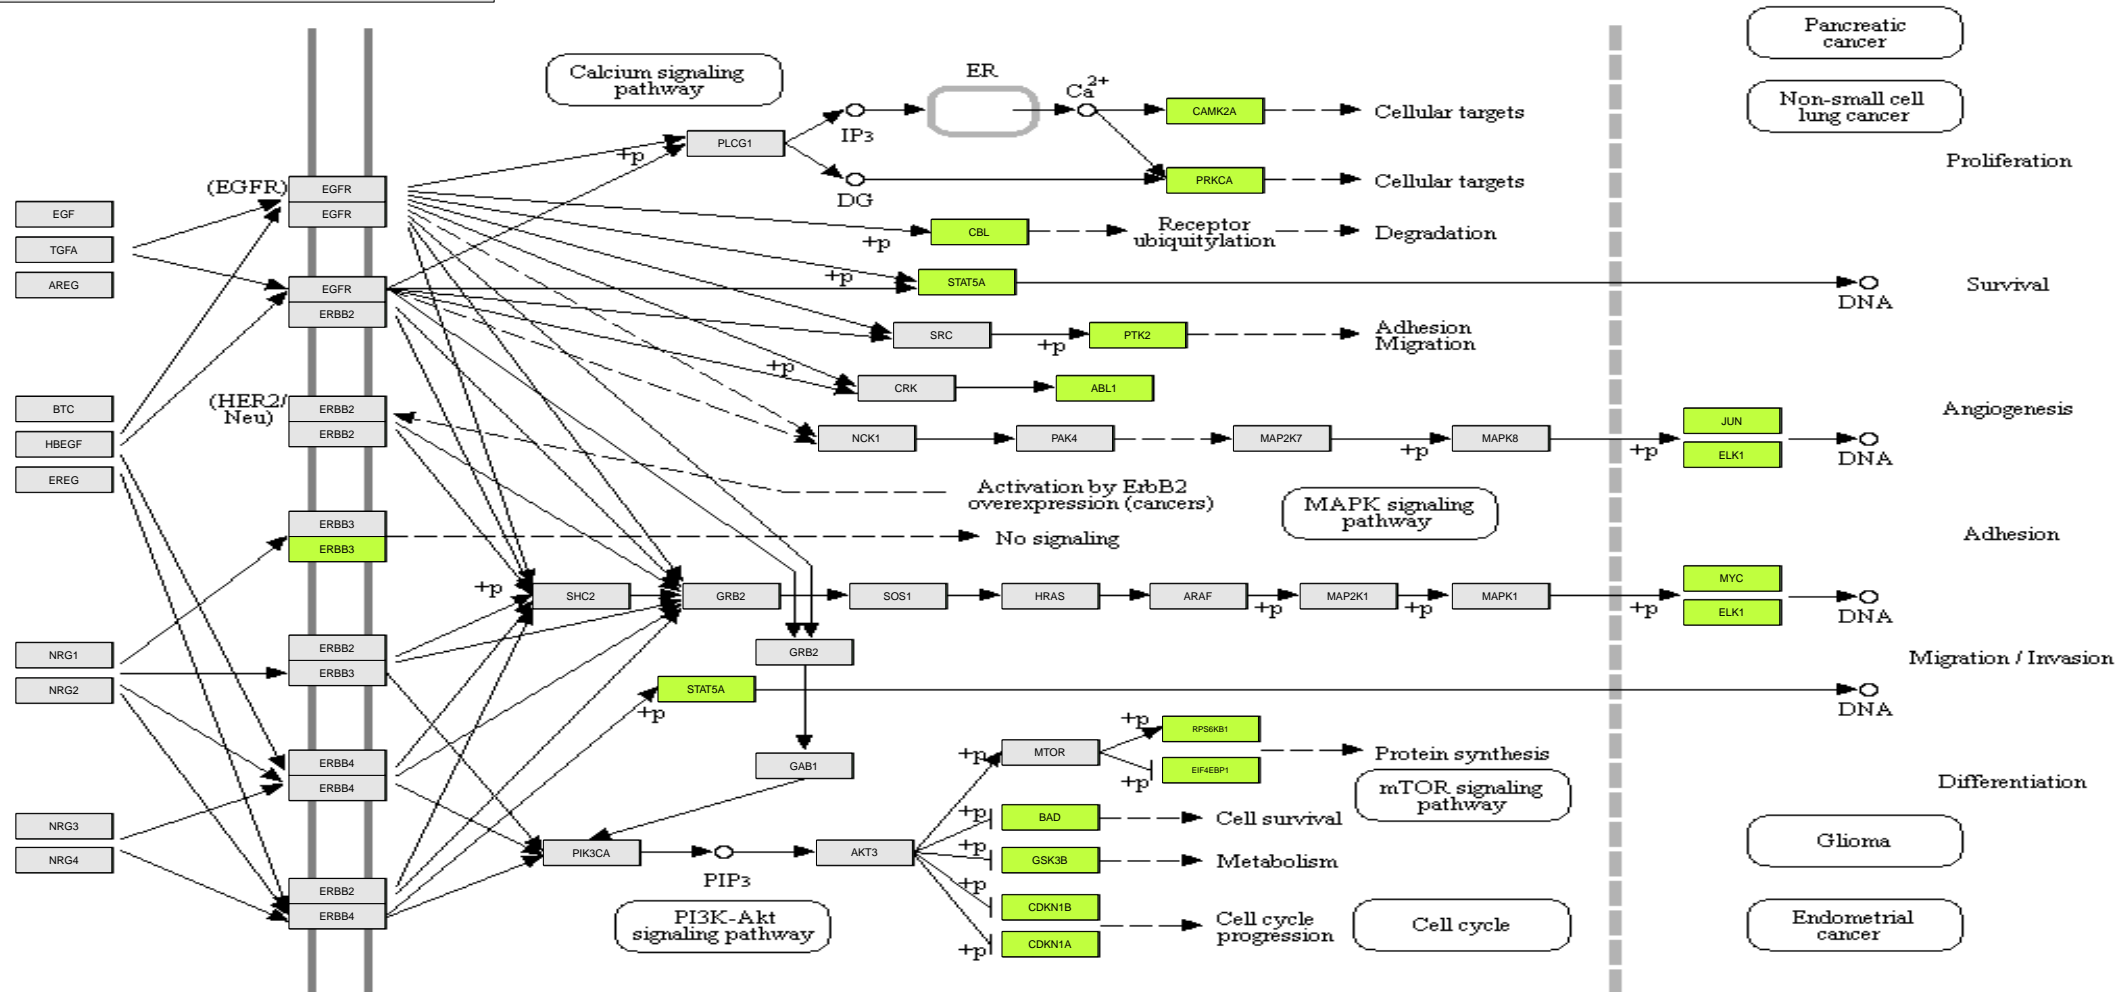

ErbB\_signaling\_pathway  
Prenatal

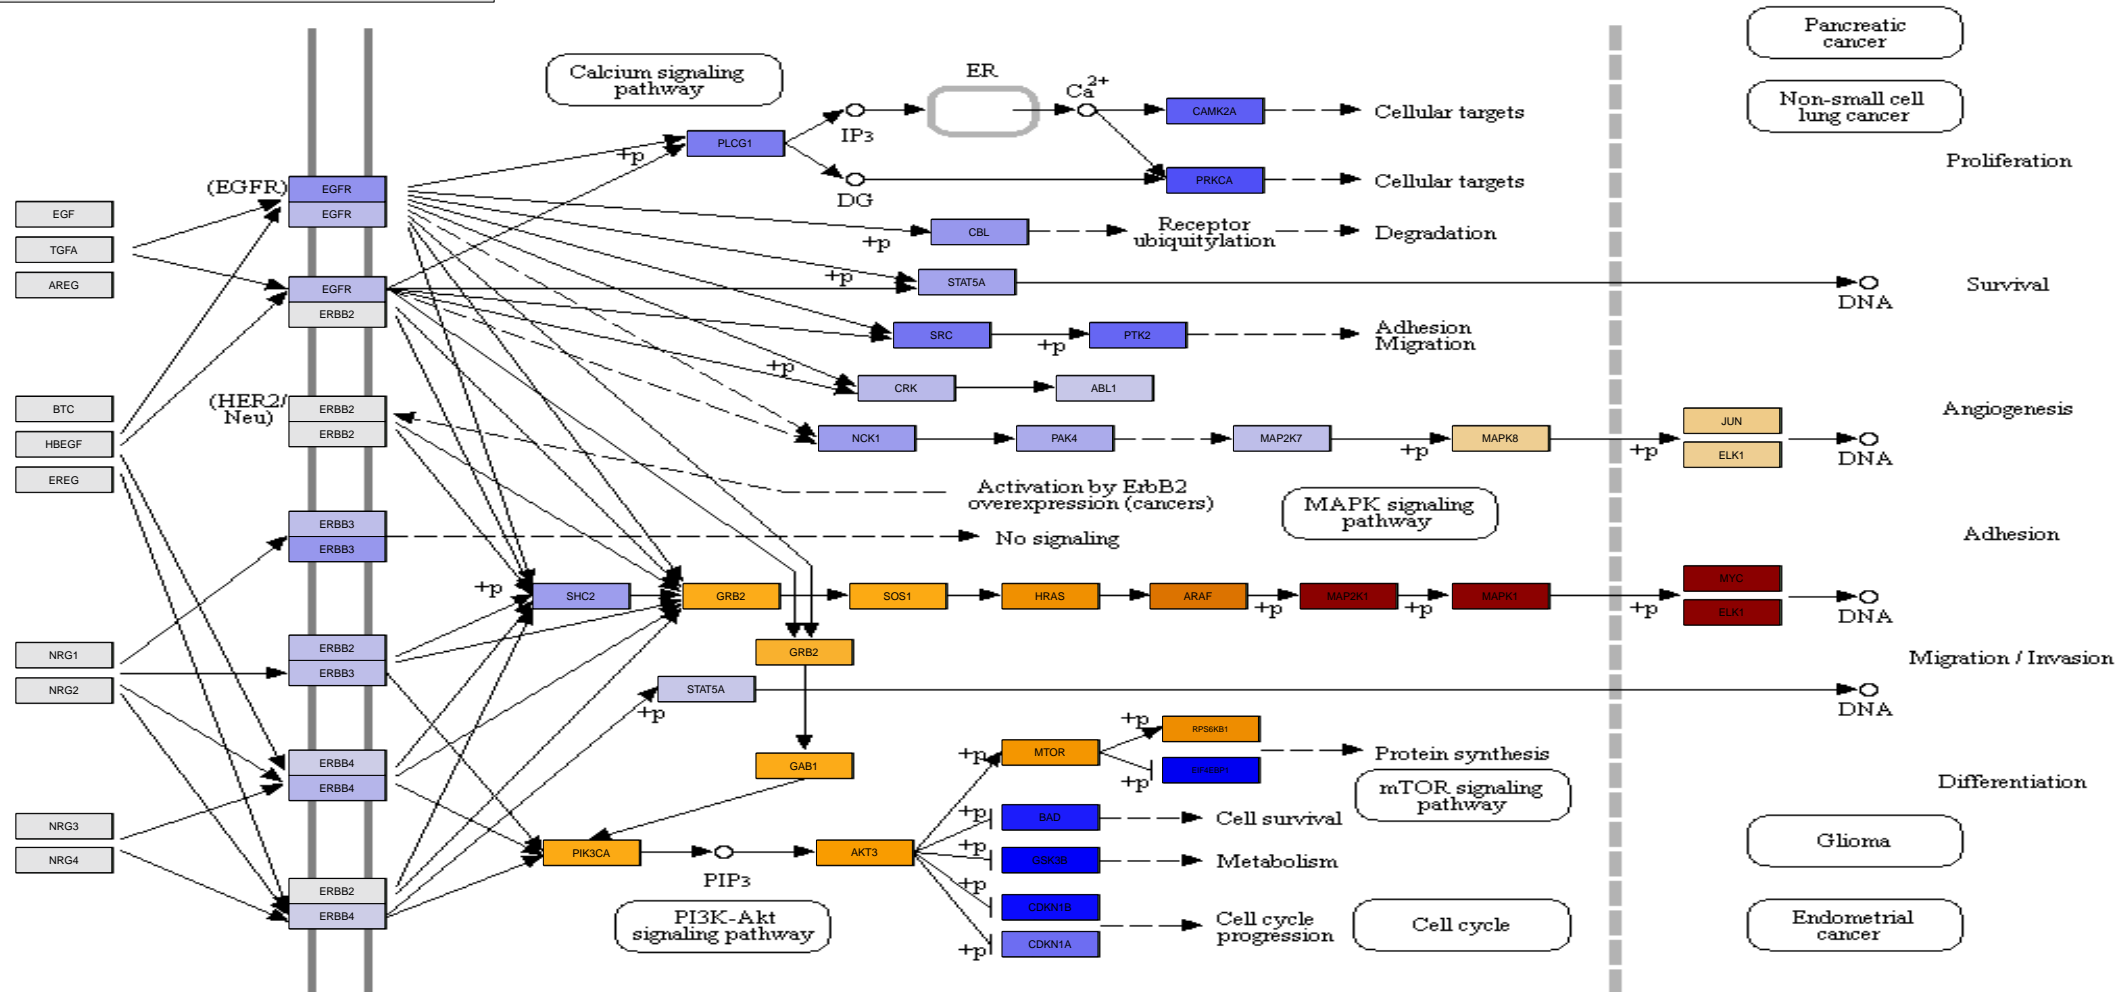

ErbB\_signaling\_pathway  
Newborn

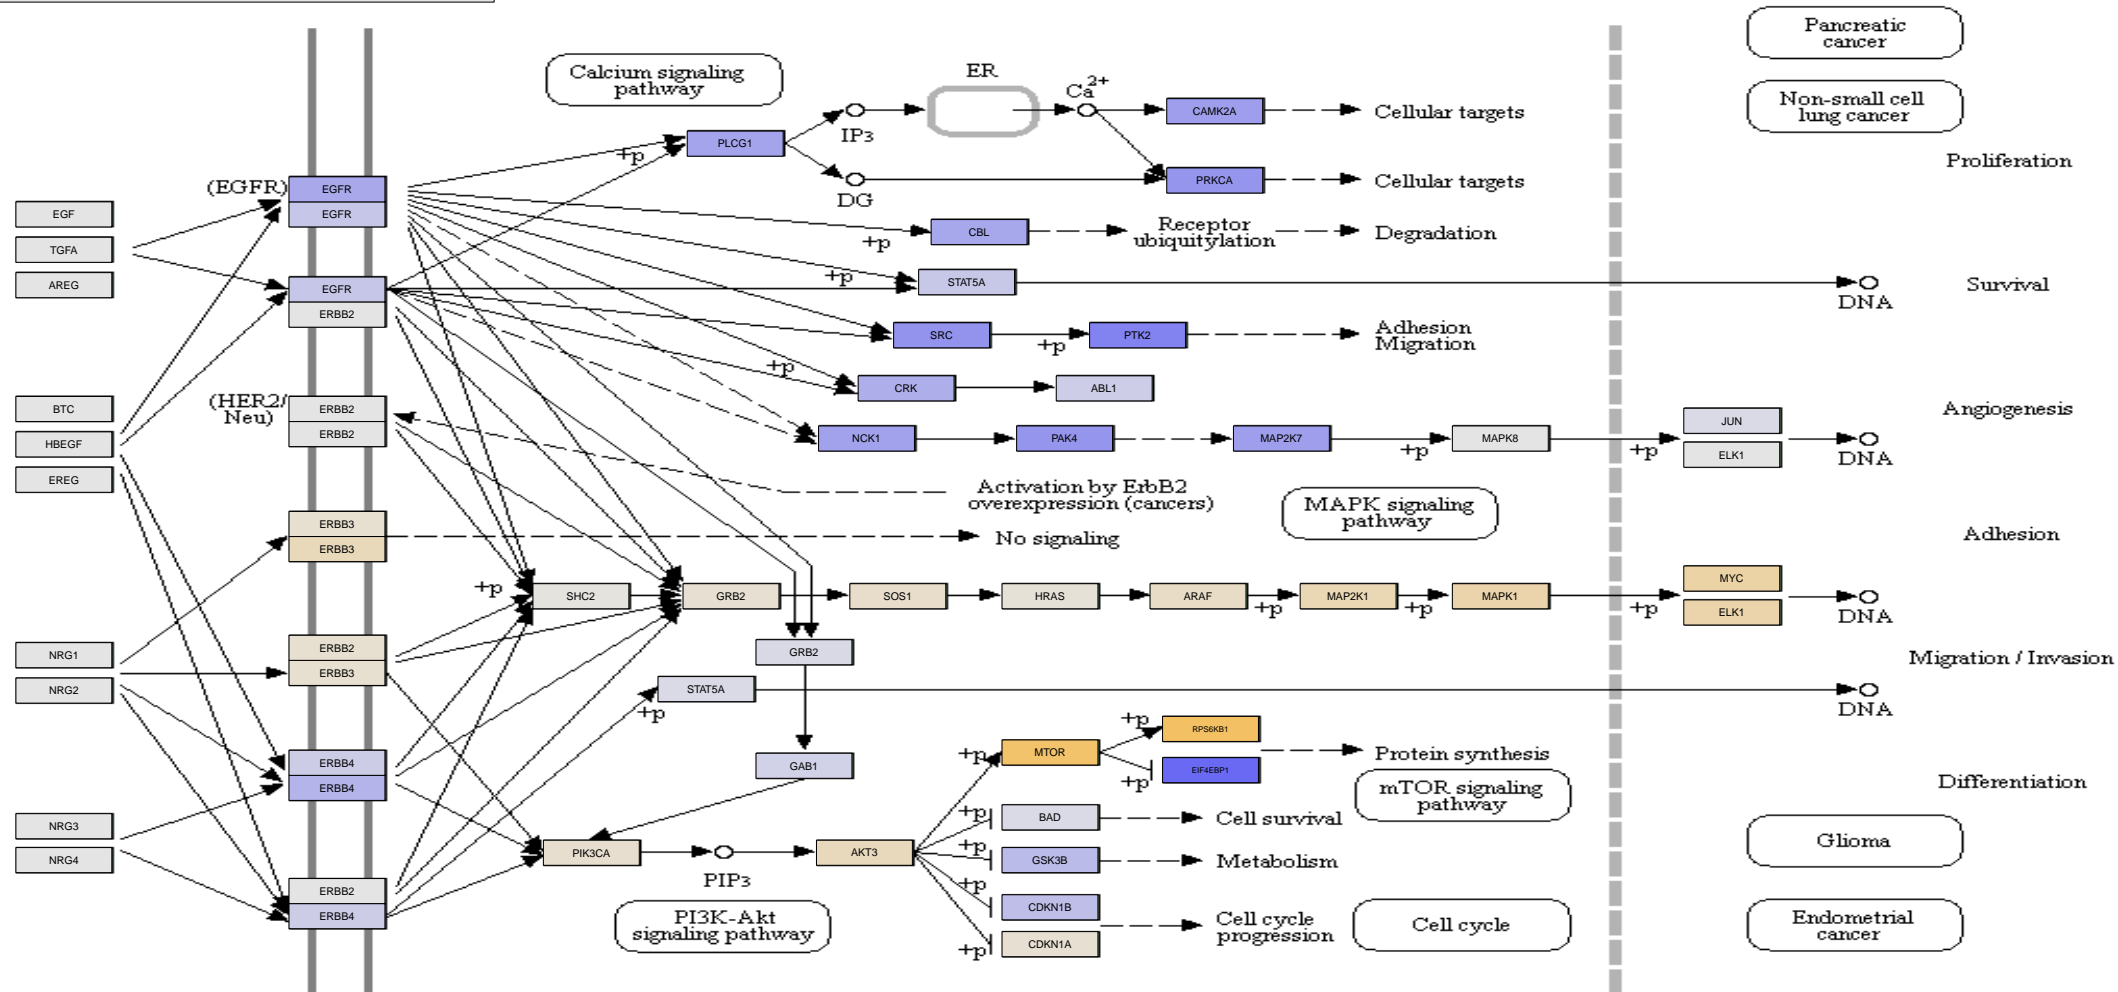

ErbB\_signaling\_pathway  
Baby

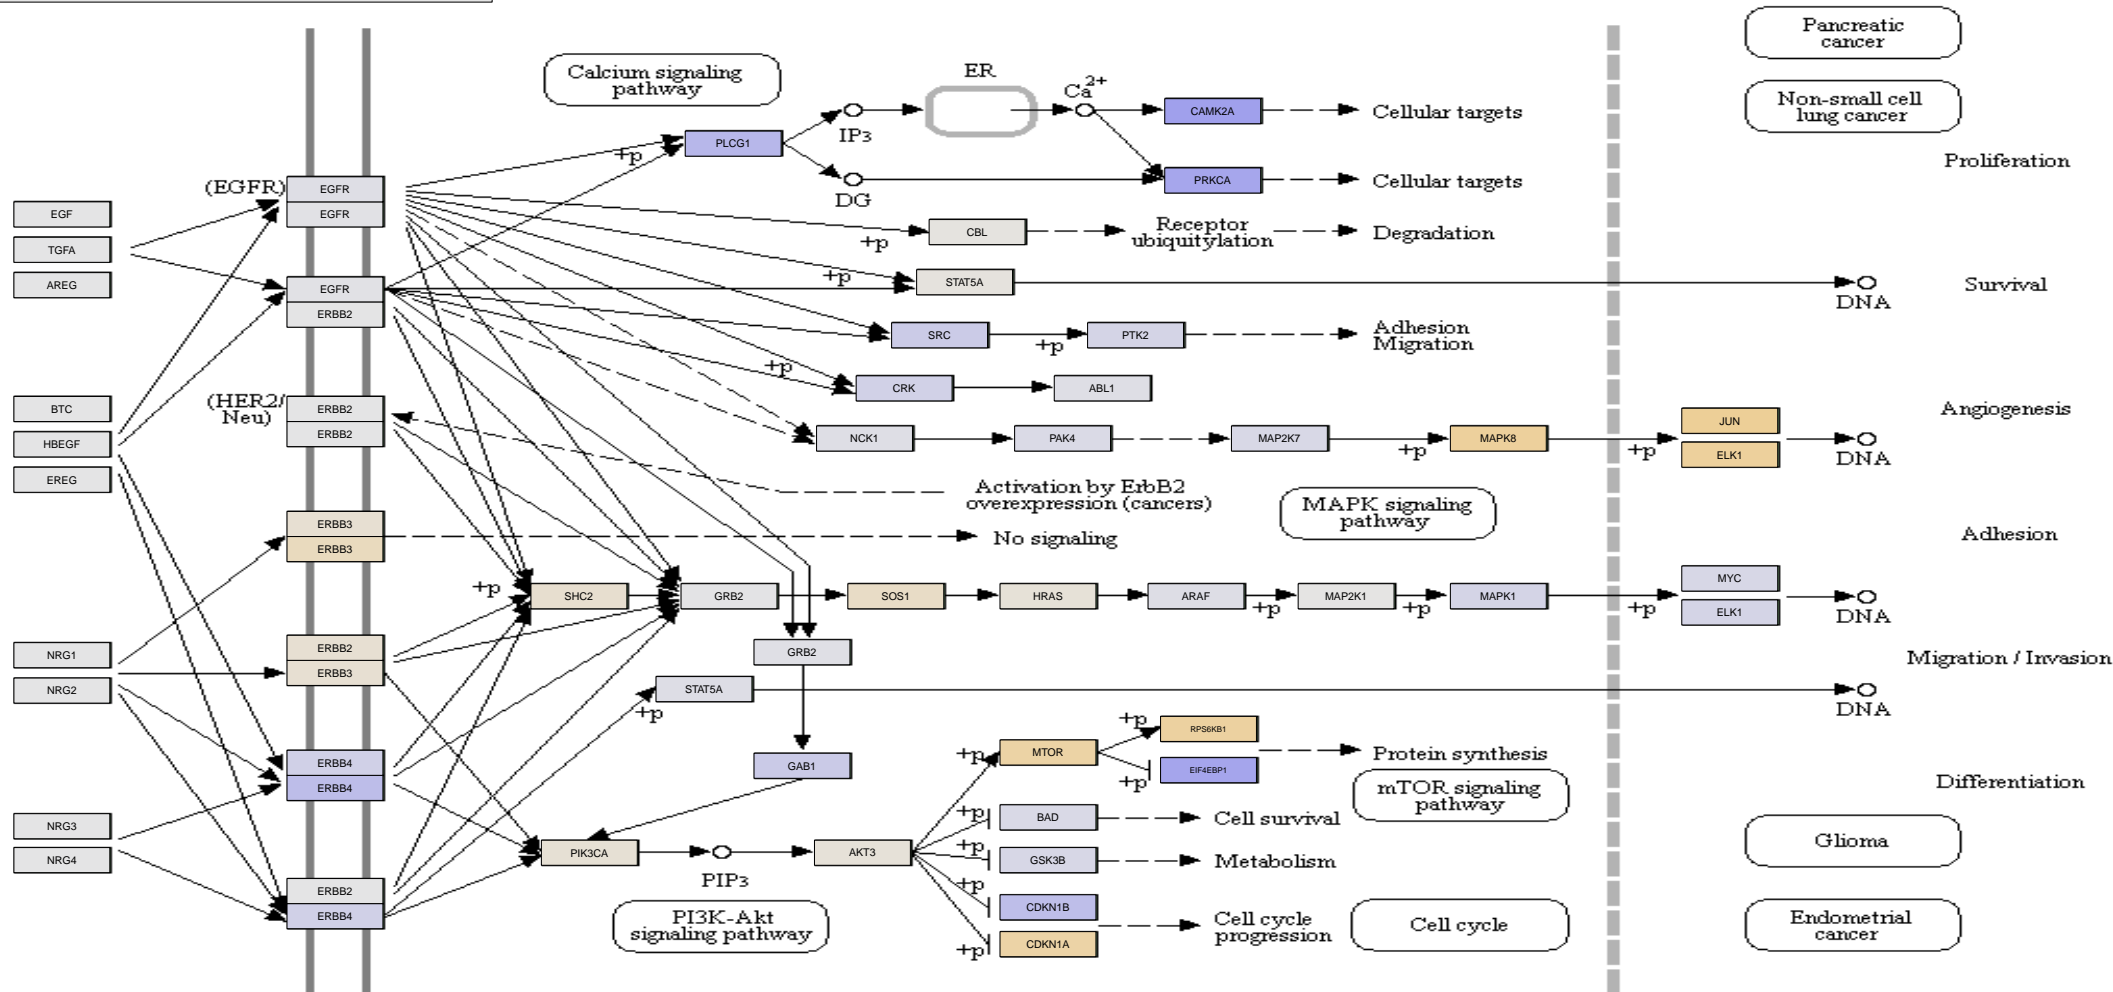



ErbB\_signaling\_pathway  
Teenager

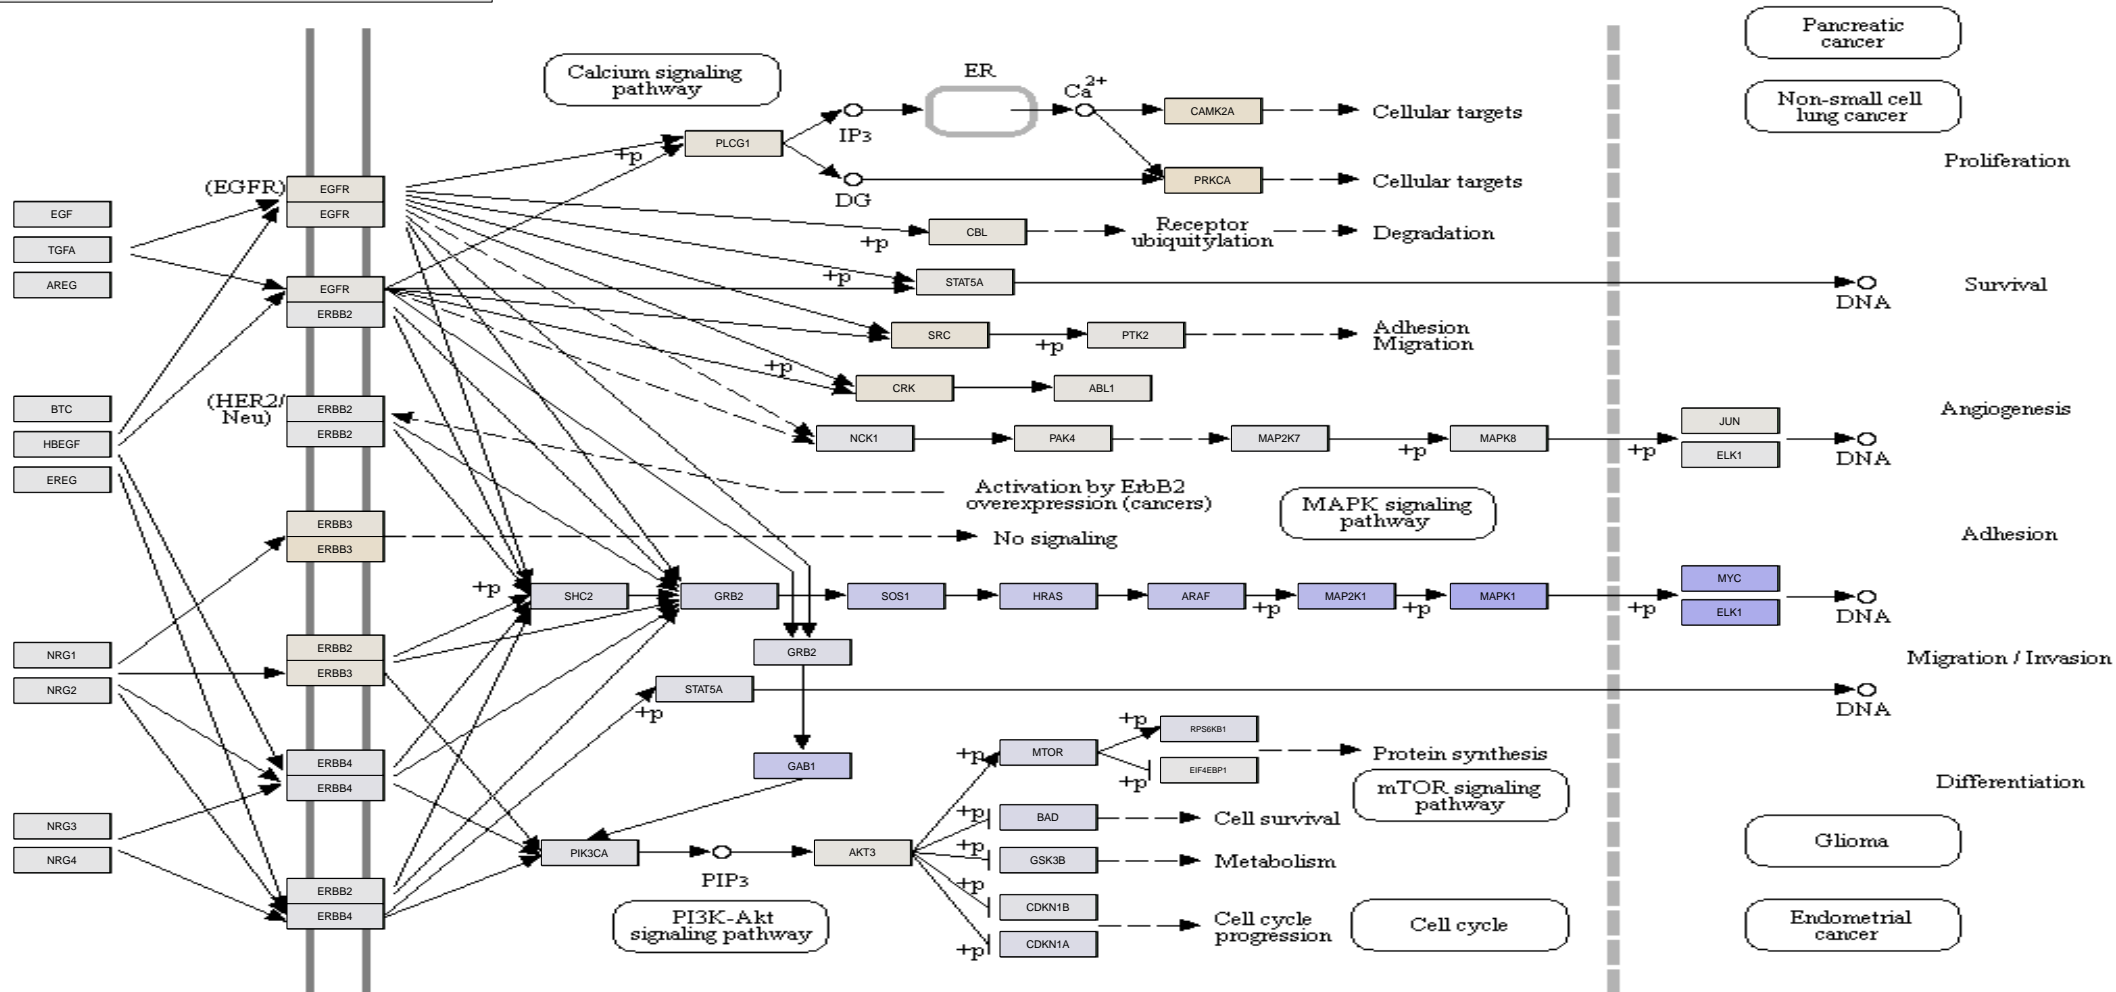



ErbB\_signaling\_pathway  
Adult

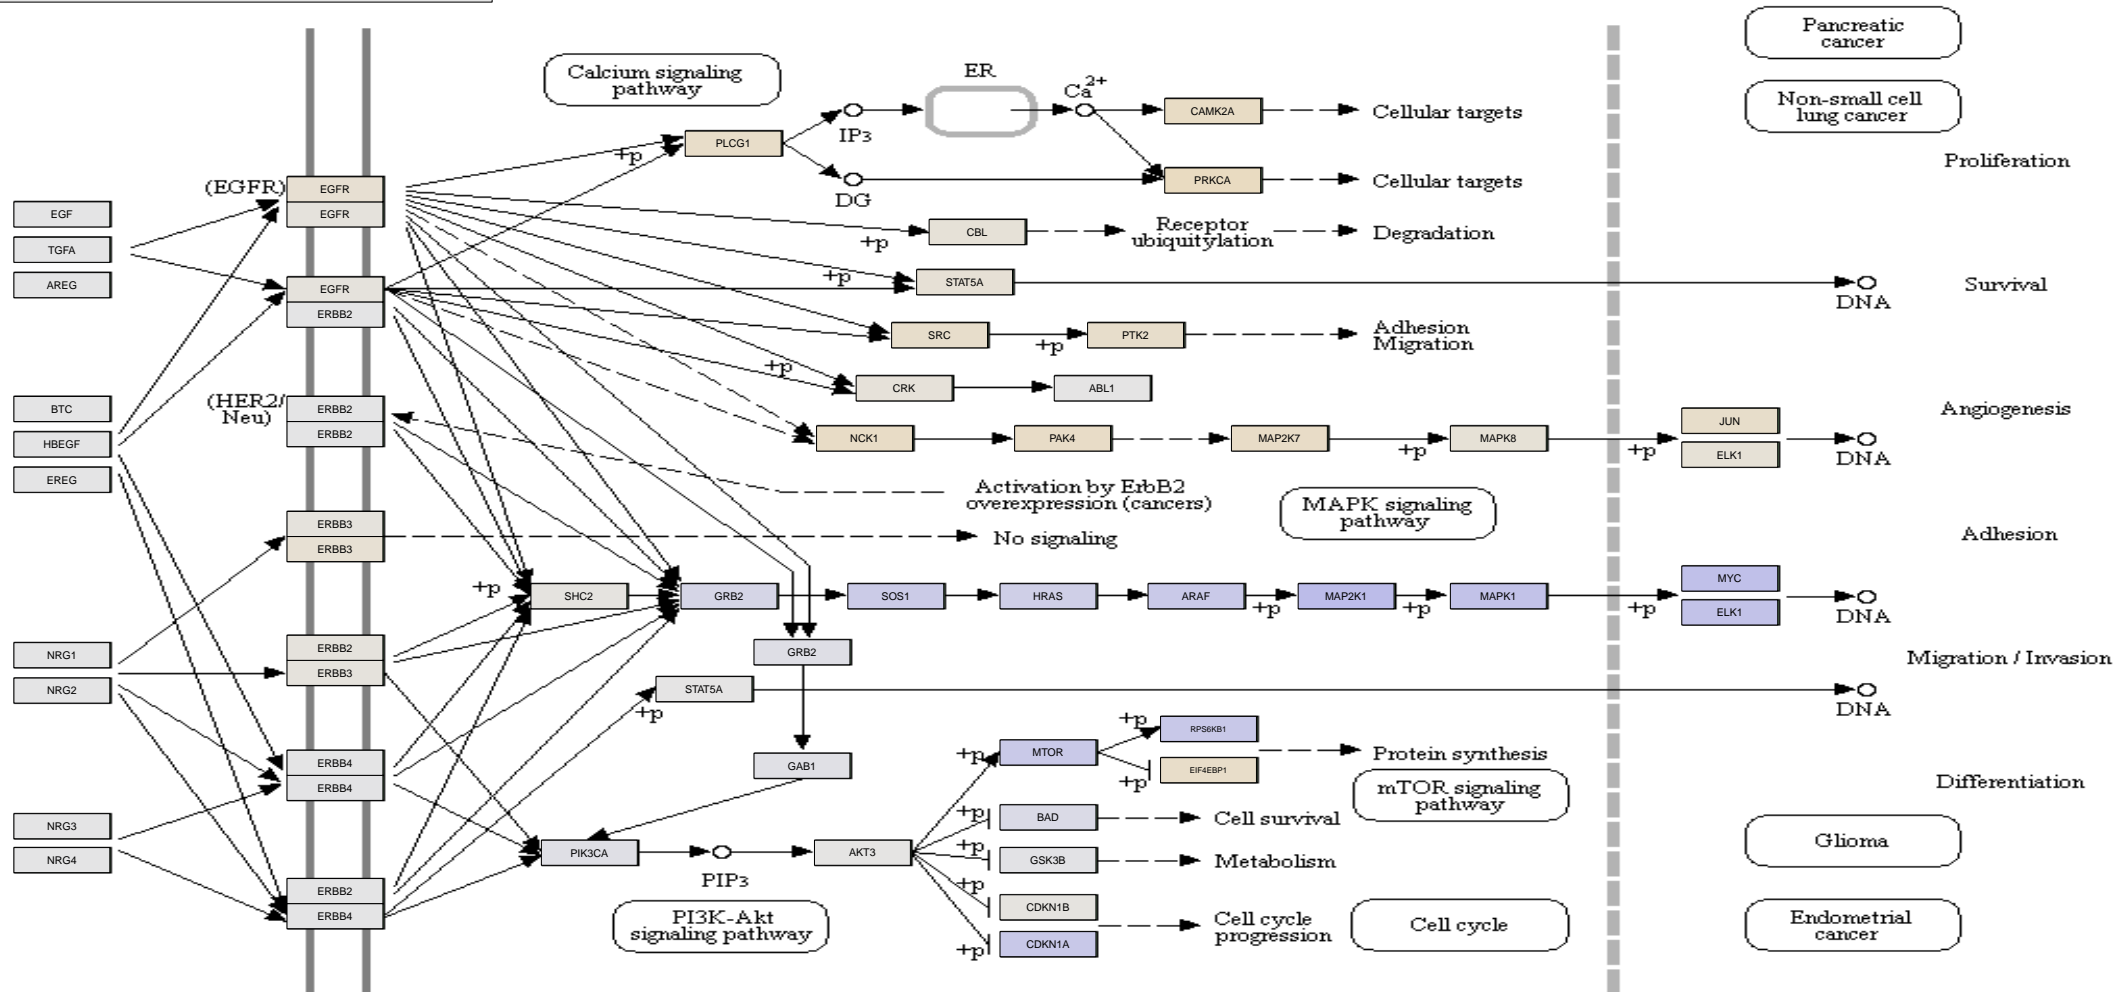

ErbB\_signaling\_pathway  
Late adult

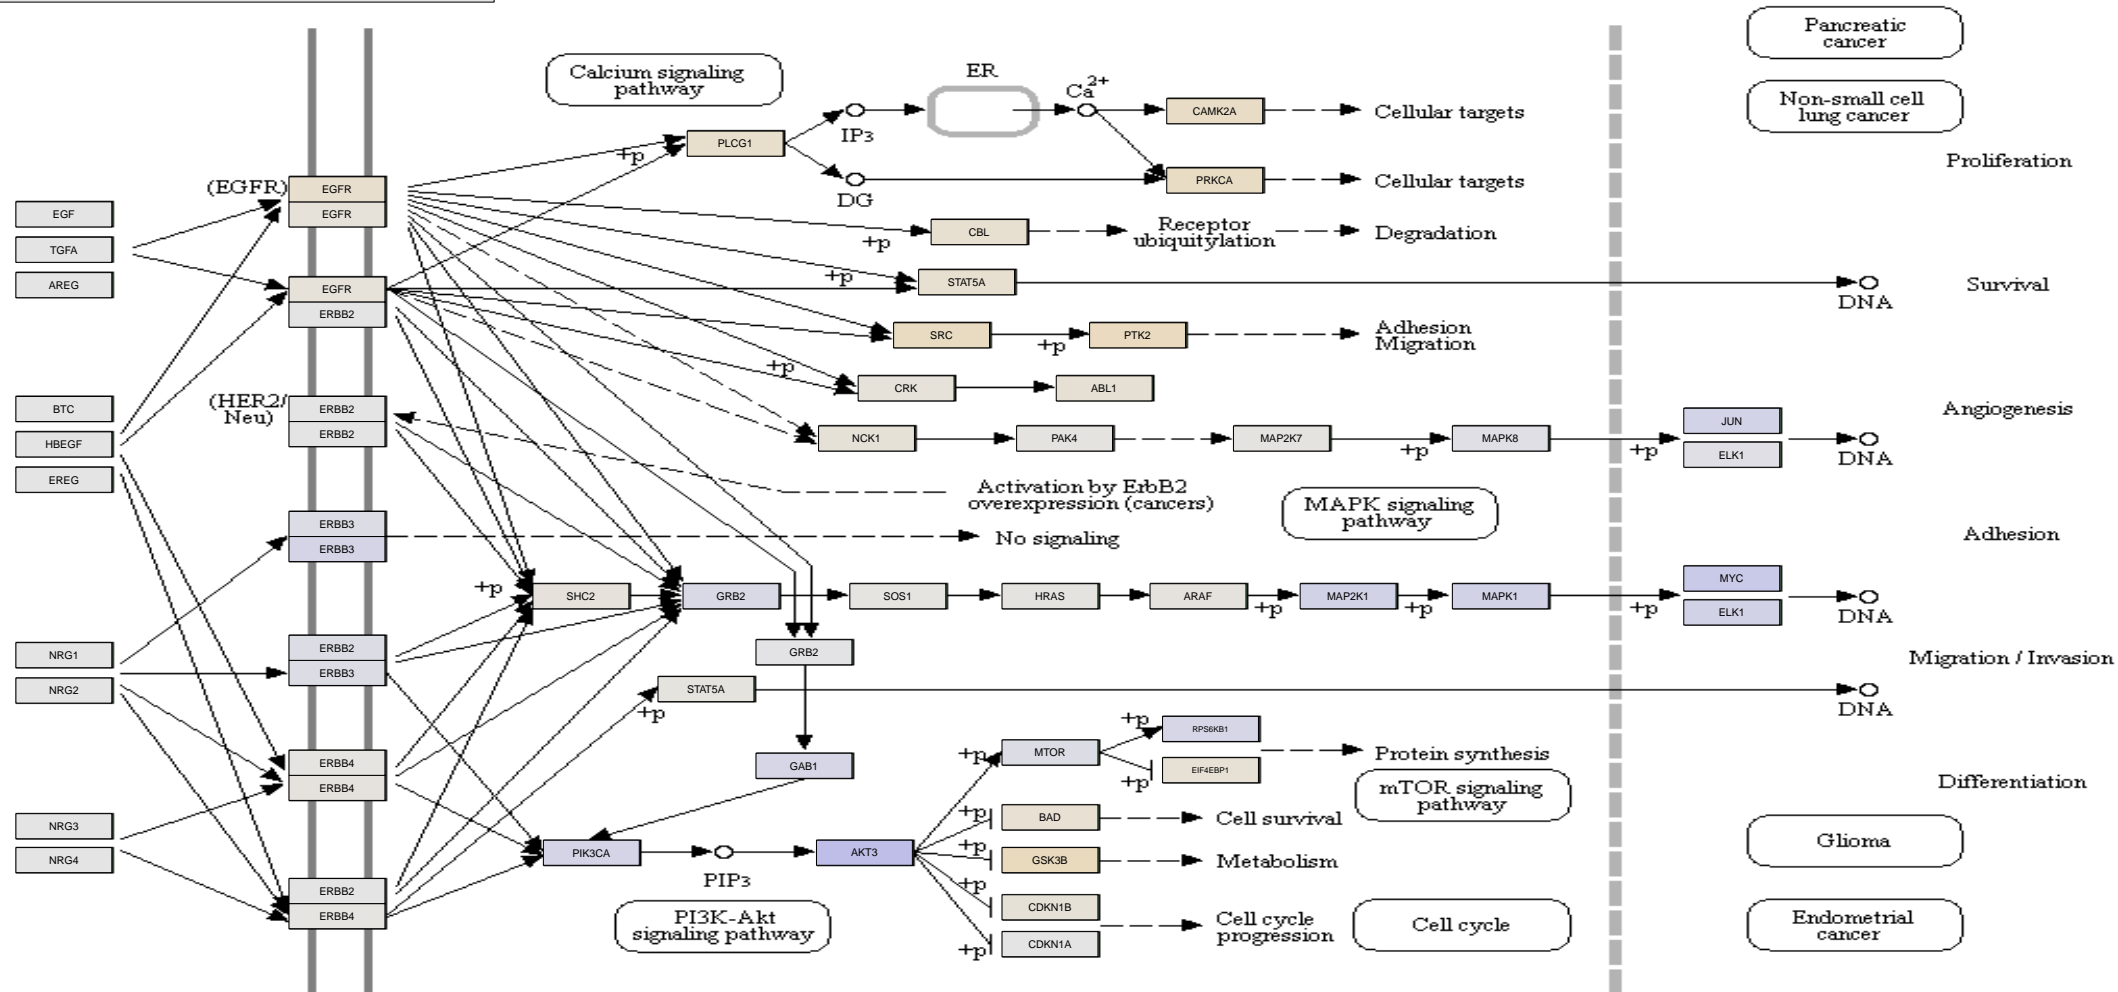

Supplement: s1 [file s1]
