# Supplementary material for: The Transcriptome and Methylome of the Developing and Aging Brain and Their Relations to Gliomas and Psychological Disorders
Source: MDPI journal article supplement (doi:10.3390/cells11030362), 2022-01-21

Adrenergic signaling in cardiomyocytes

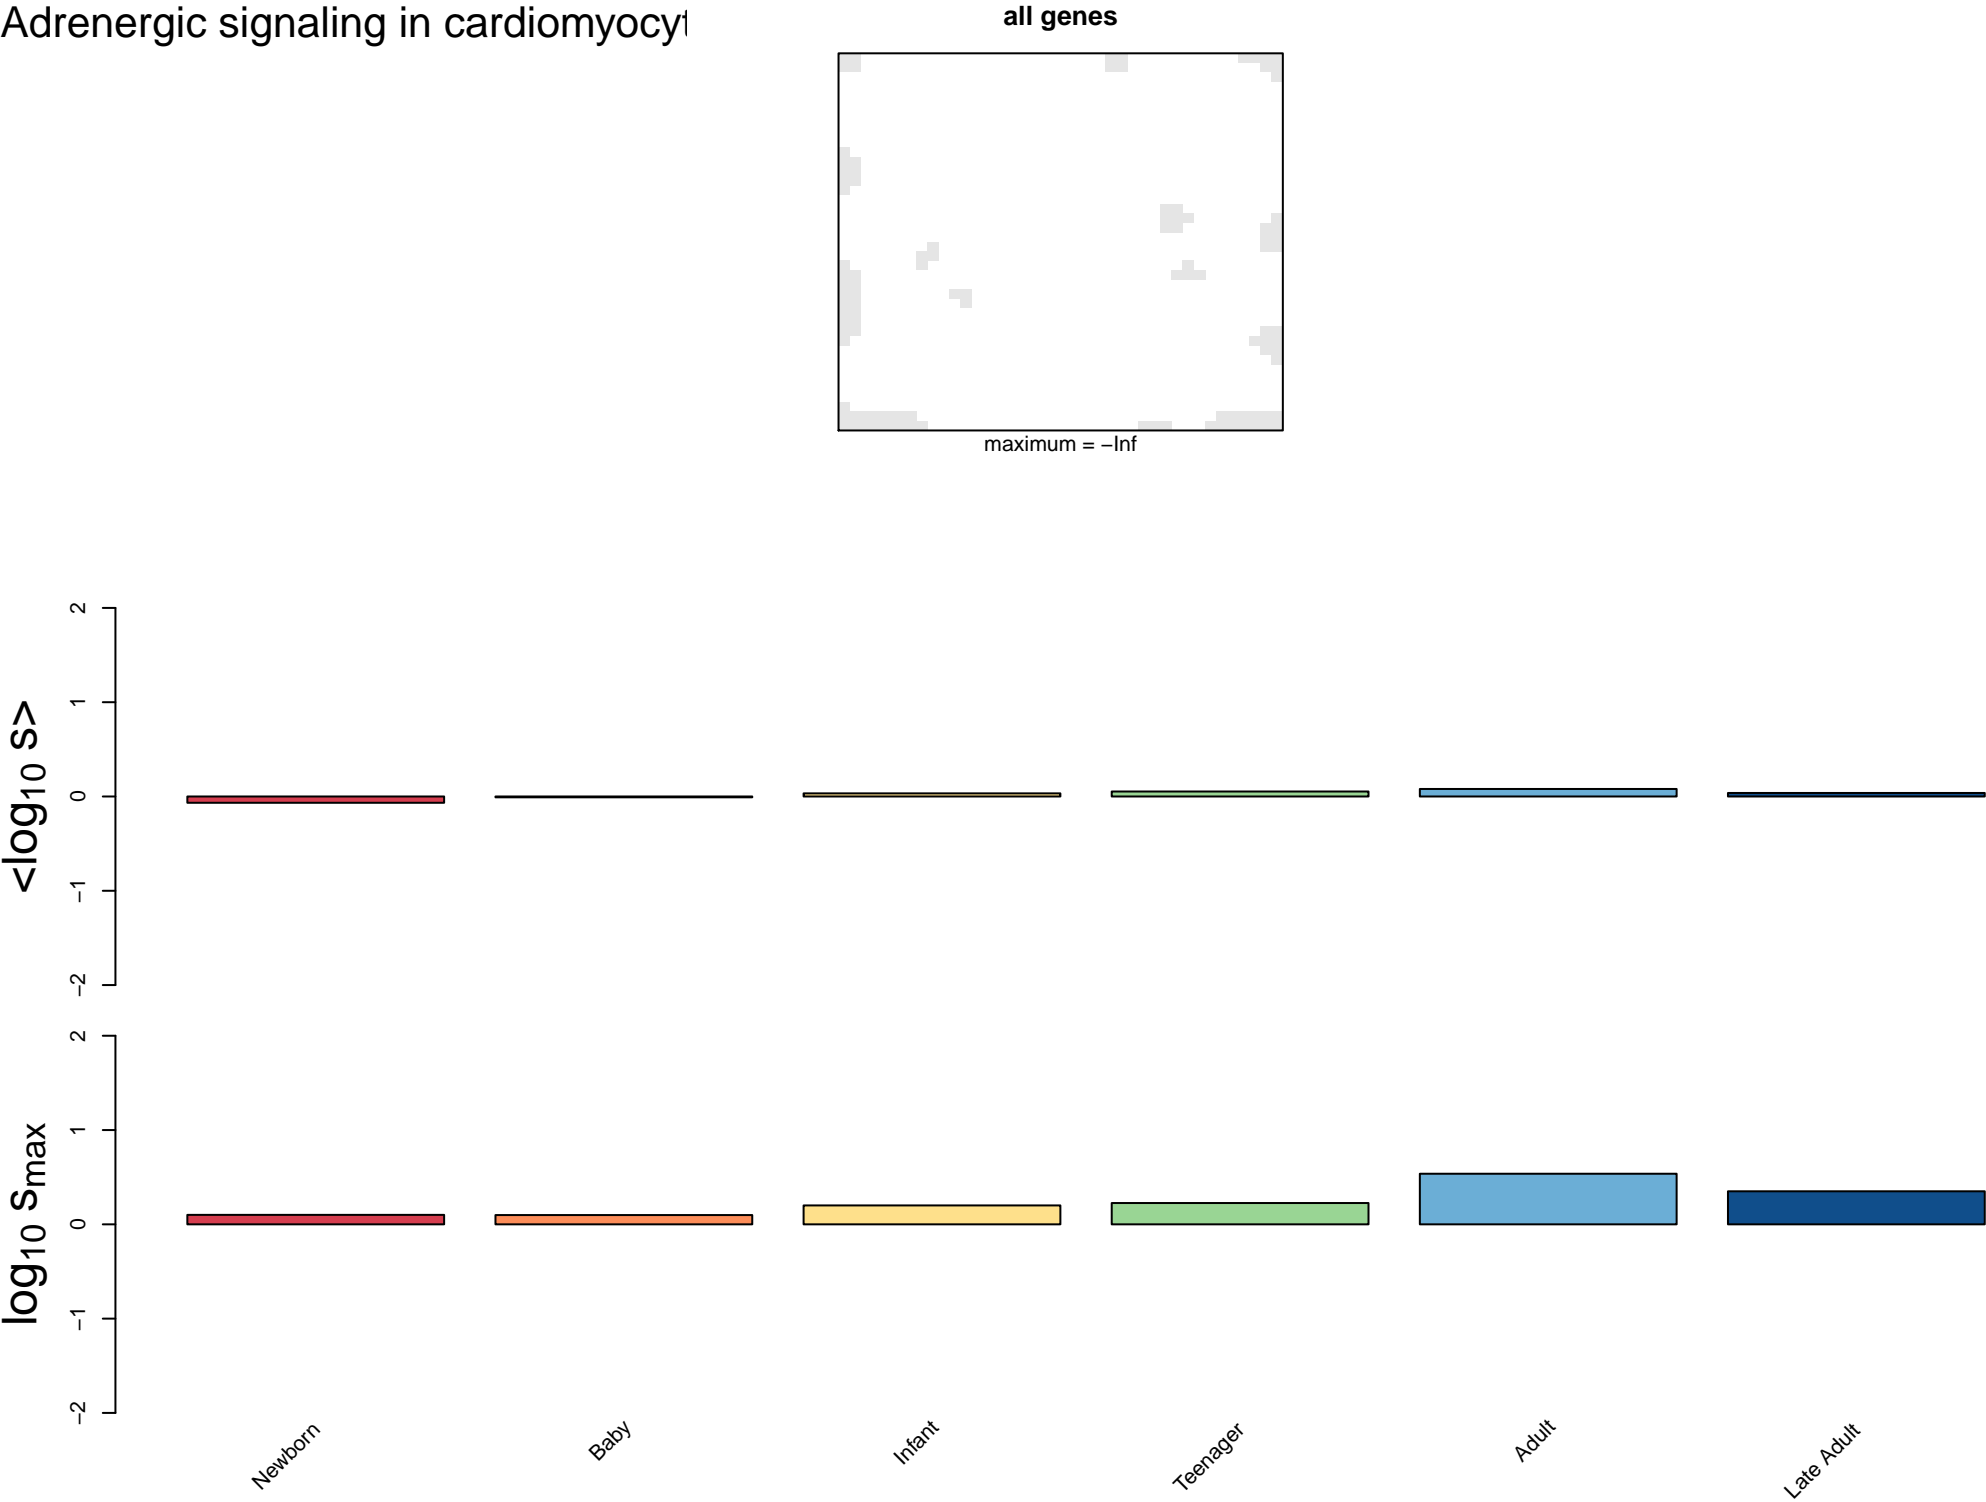

Adrenergic signaling in cardiomyocytes  
genes with data

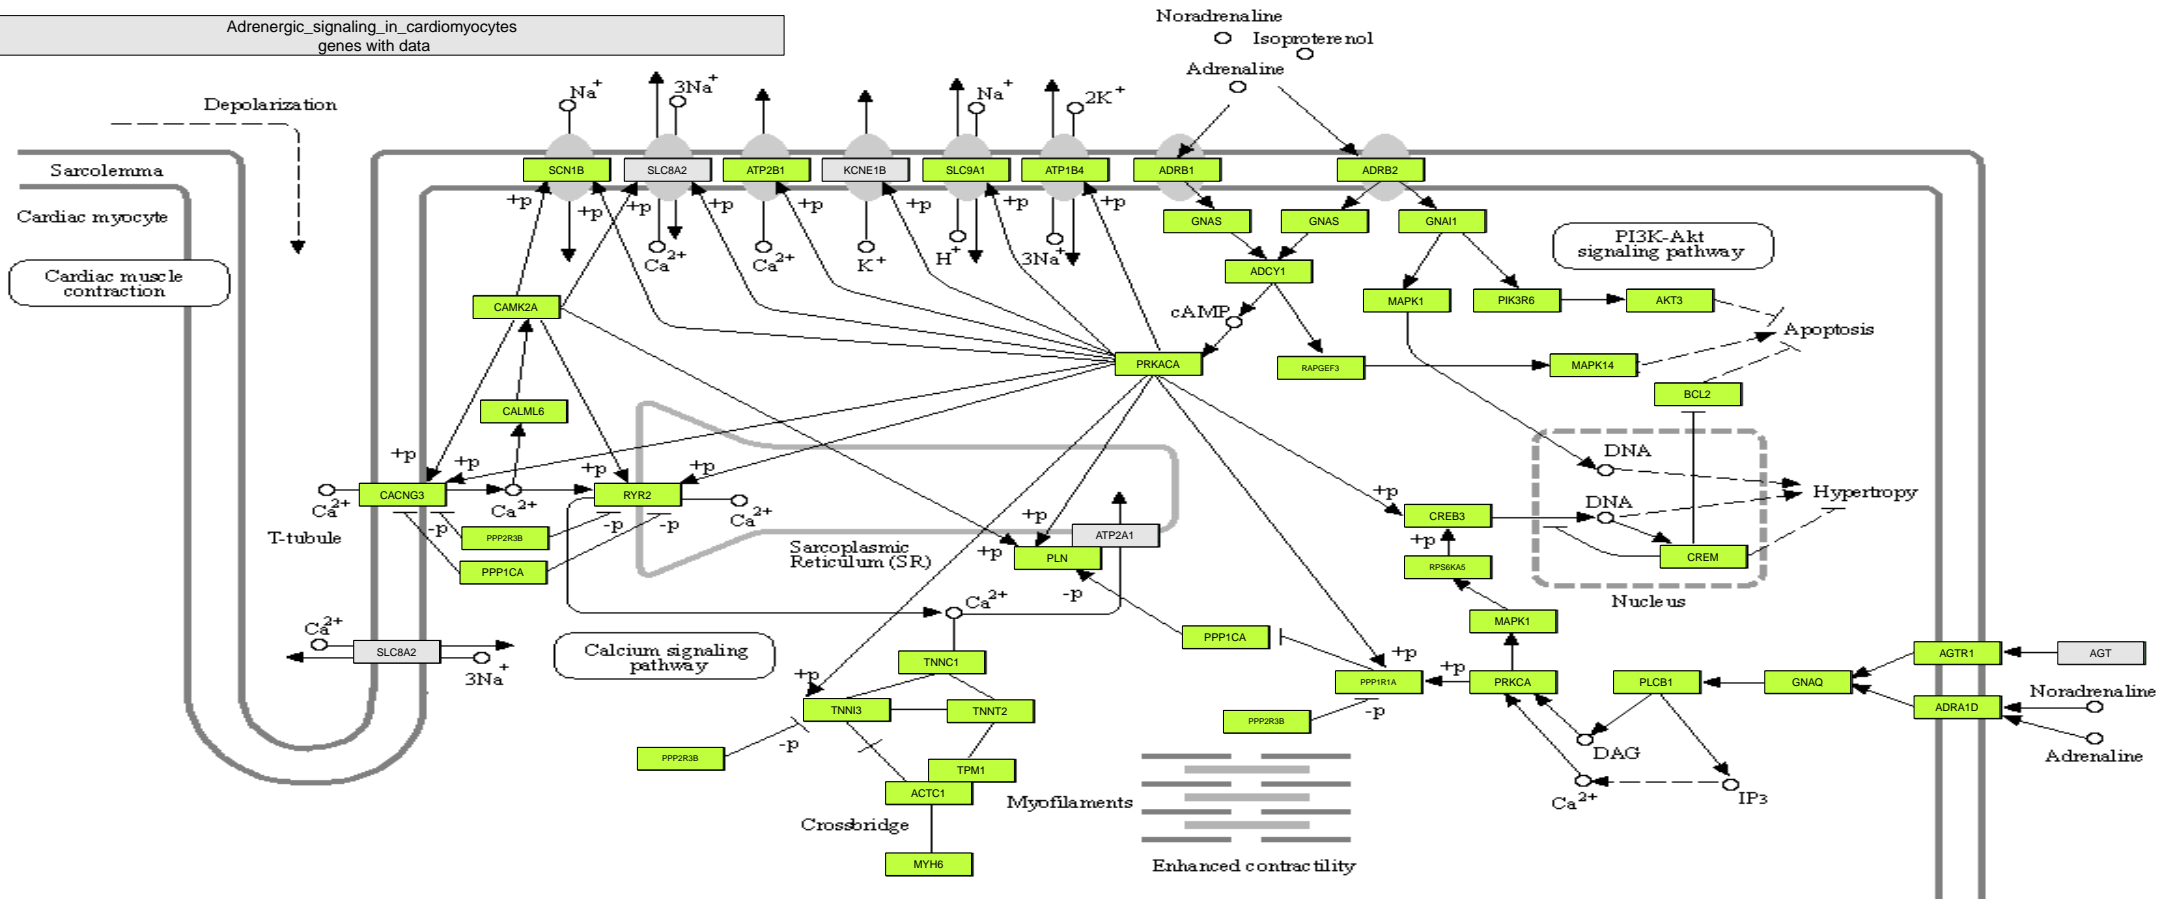

Adrenergic signaling in cardiomyocytes  
sink nodes

Depolarization

Sarcolemma

Cardiac myocyte

Cardiac muscle contraction

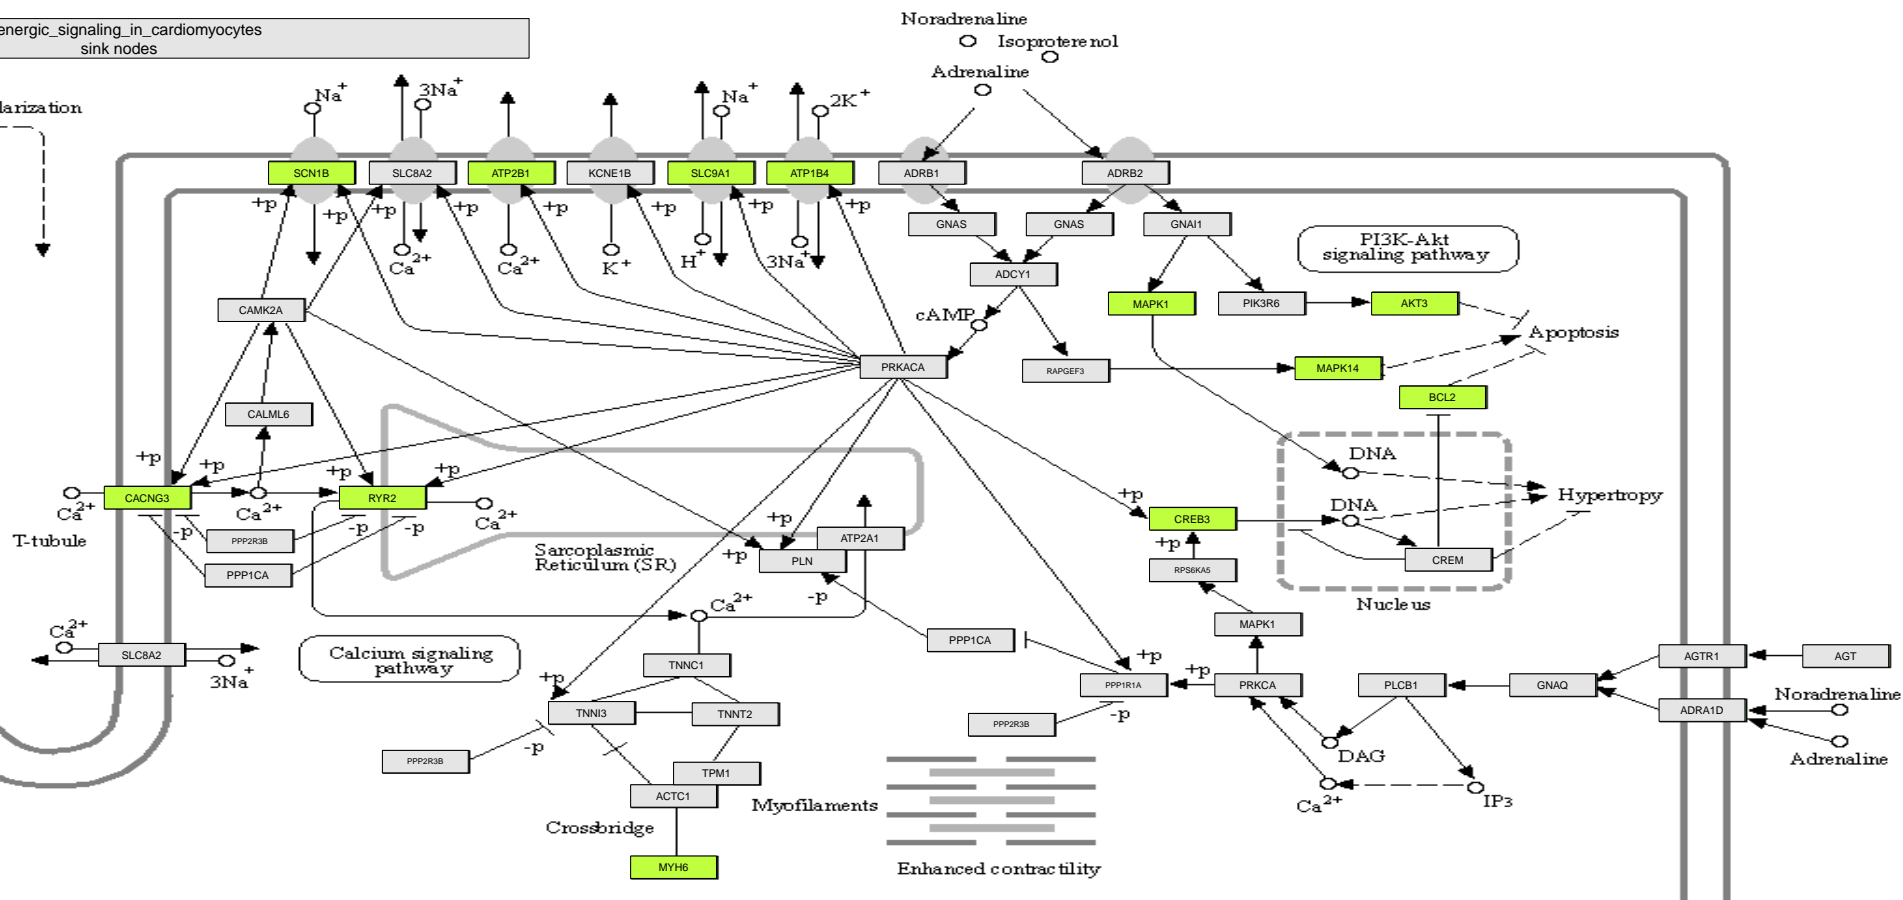

# Adrenergic signaling in cardiomyocytes Newborn

Depolarization

Sarcolemma

Cardiac myocyte

Cardiac muscle contraction

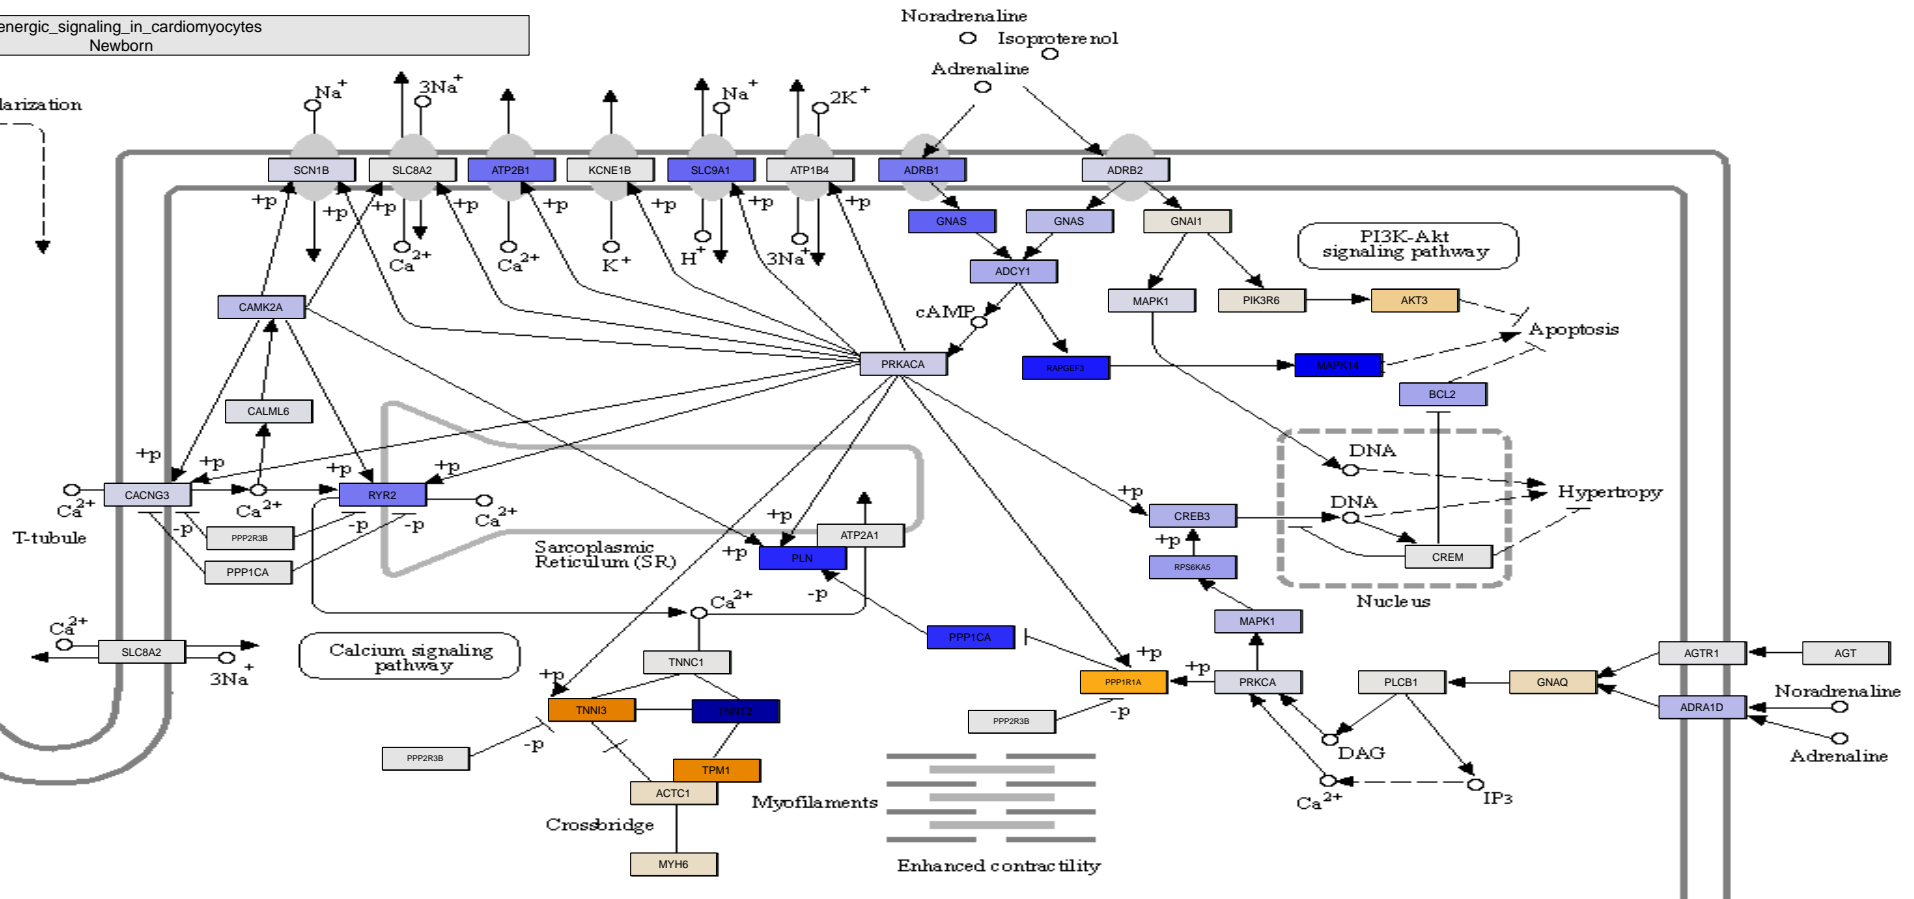

Adrenergic signaling in cardiomyocytes  
Baby

Depolarization

Sarcolemma

Cardiac myocyte

Cardiac muscle contraction

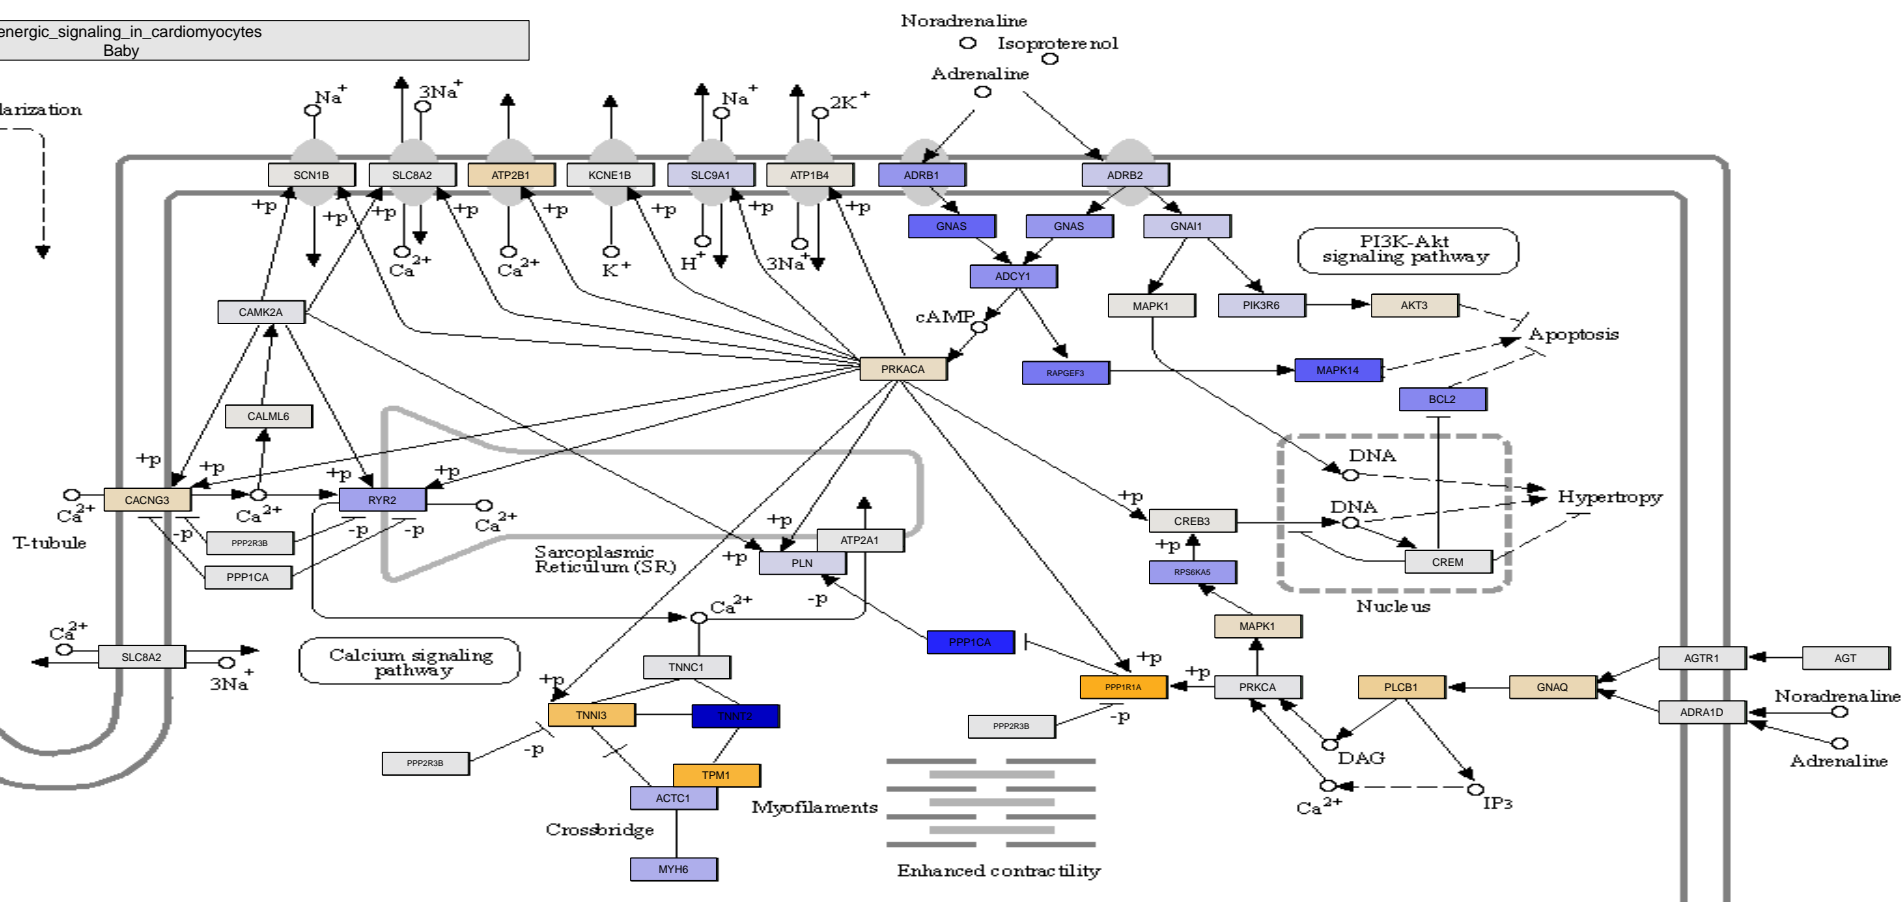

# Adrenergic signaling in cardiomyocytes Infant

Depolarization

Sarcolemma

Cardiac myocyte

Cardiac muscle contraction

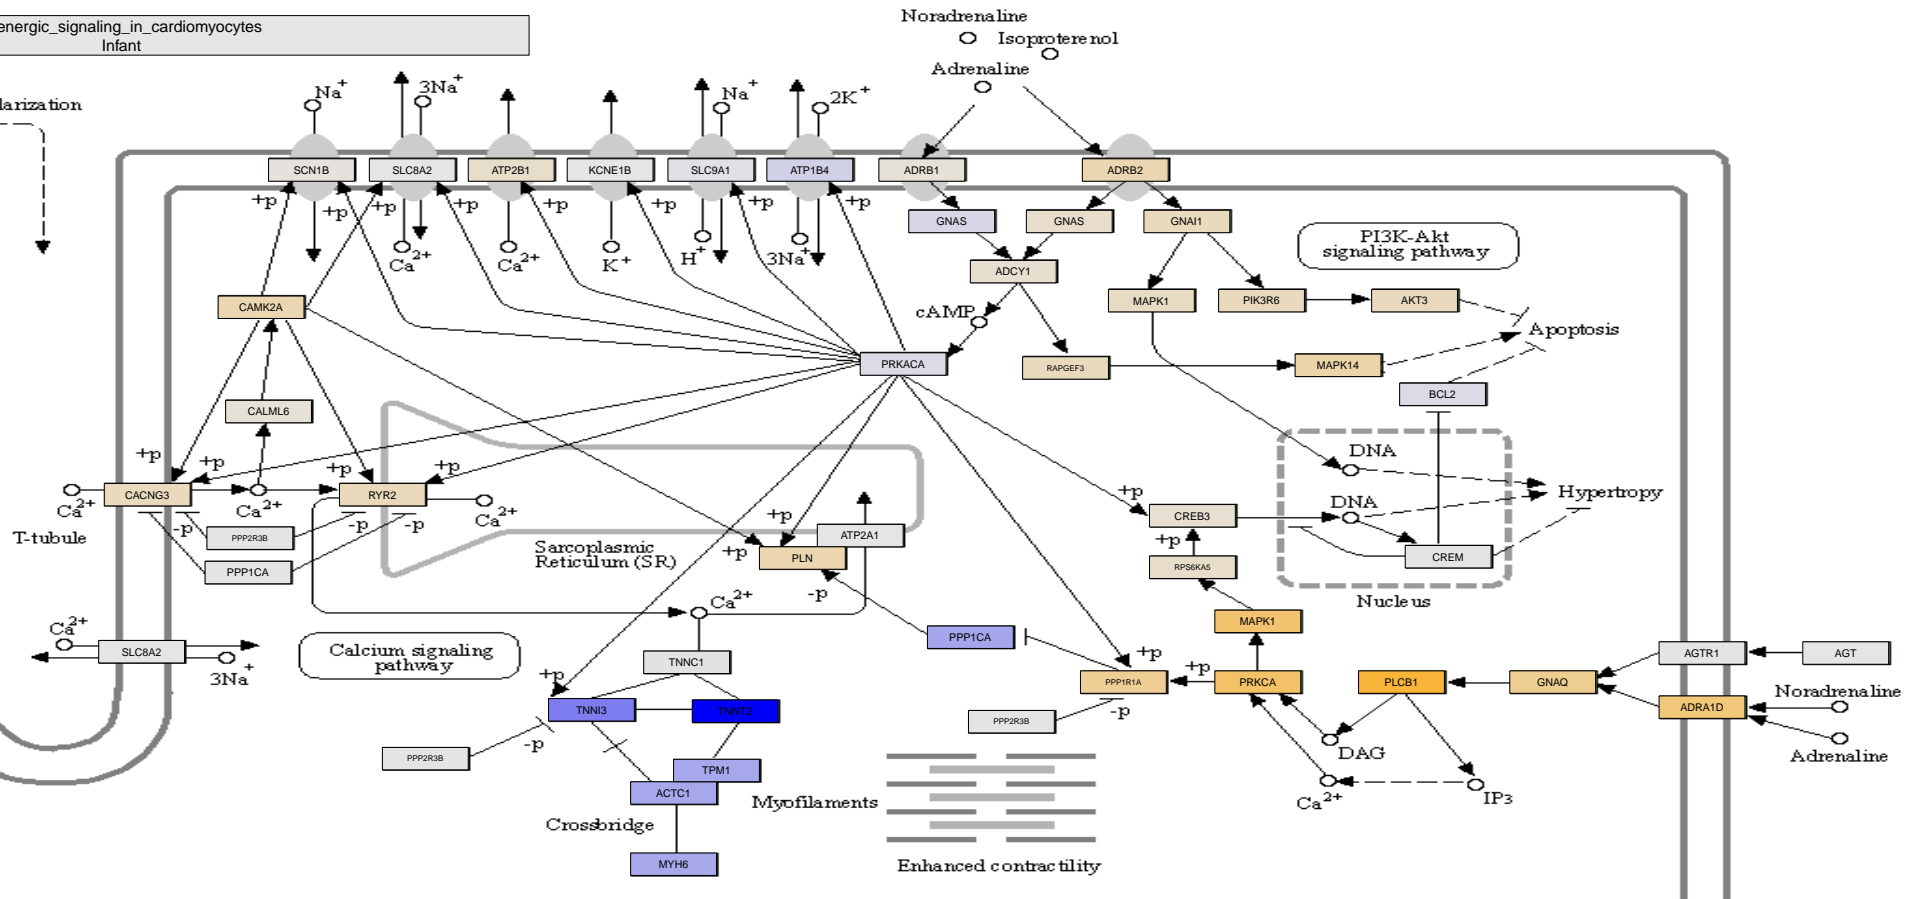

Depolarization

Sarcolemma

Cardiac myocyte

Cardiac muscle contraction

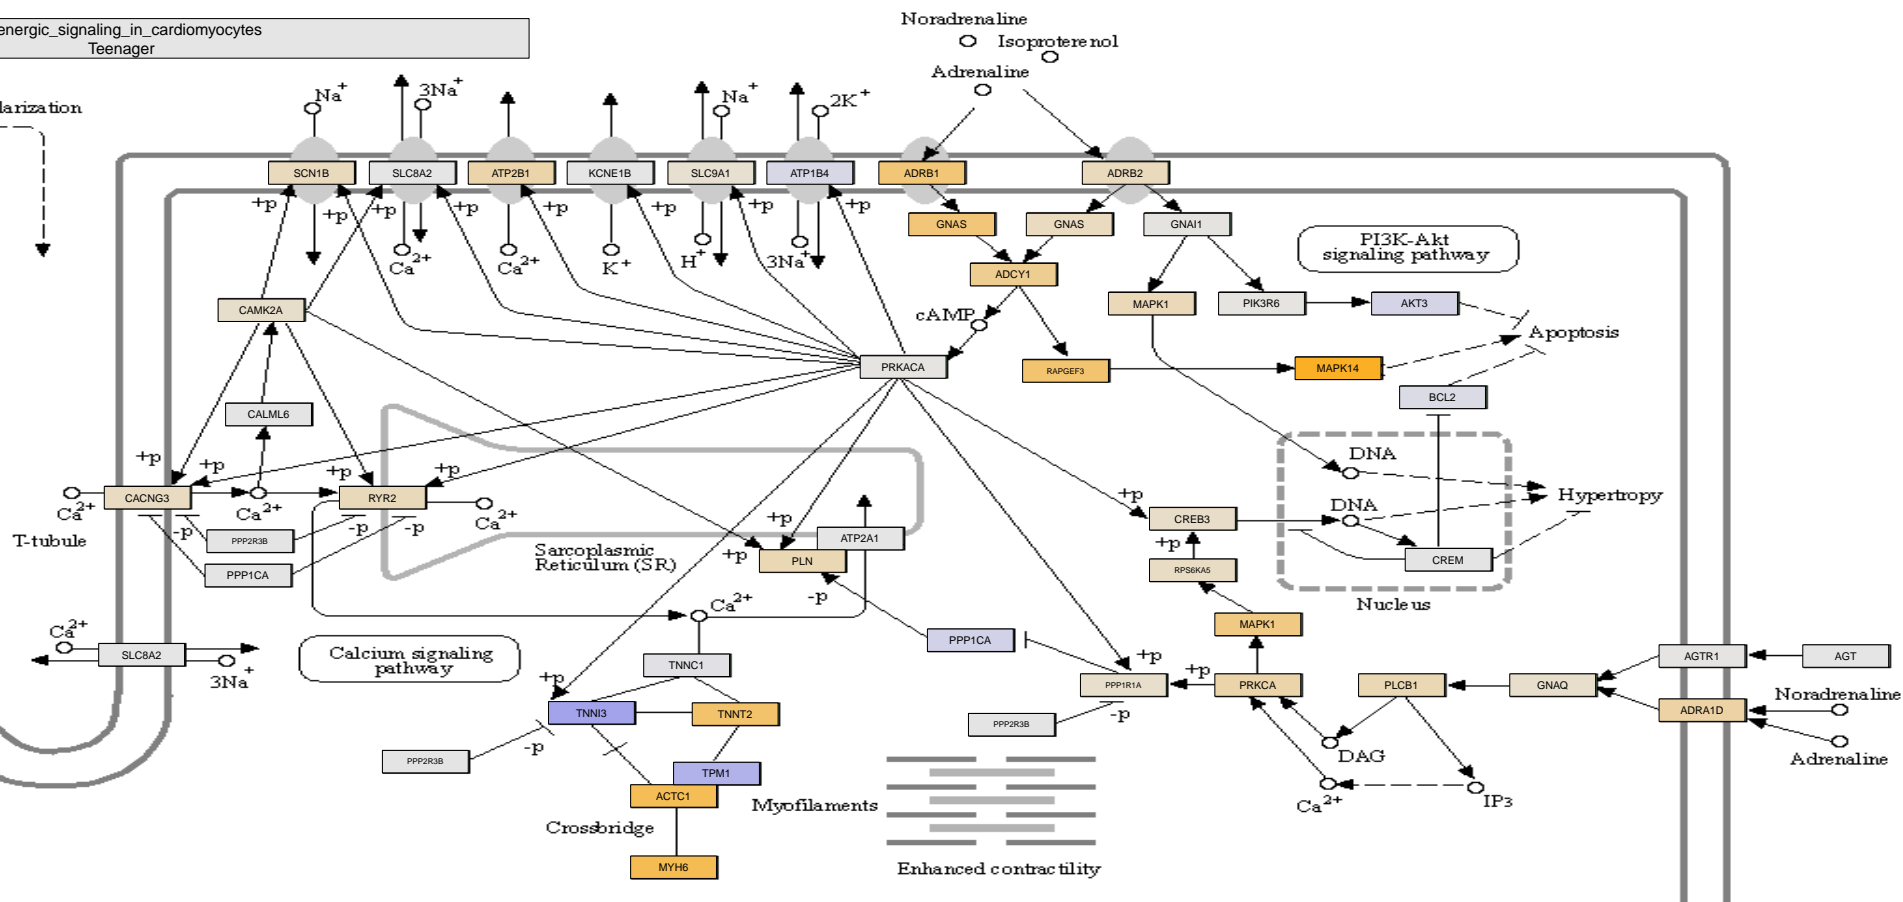

# Adrenergic signaling in cardiomyocytes Adult

Depolarization

Sarcolemma

Cardiac myocyte

Cardiac muscle contraction

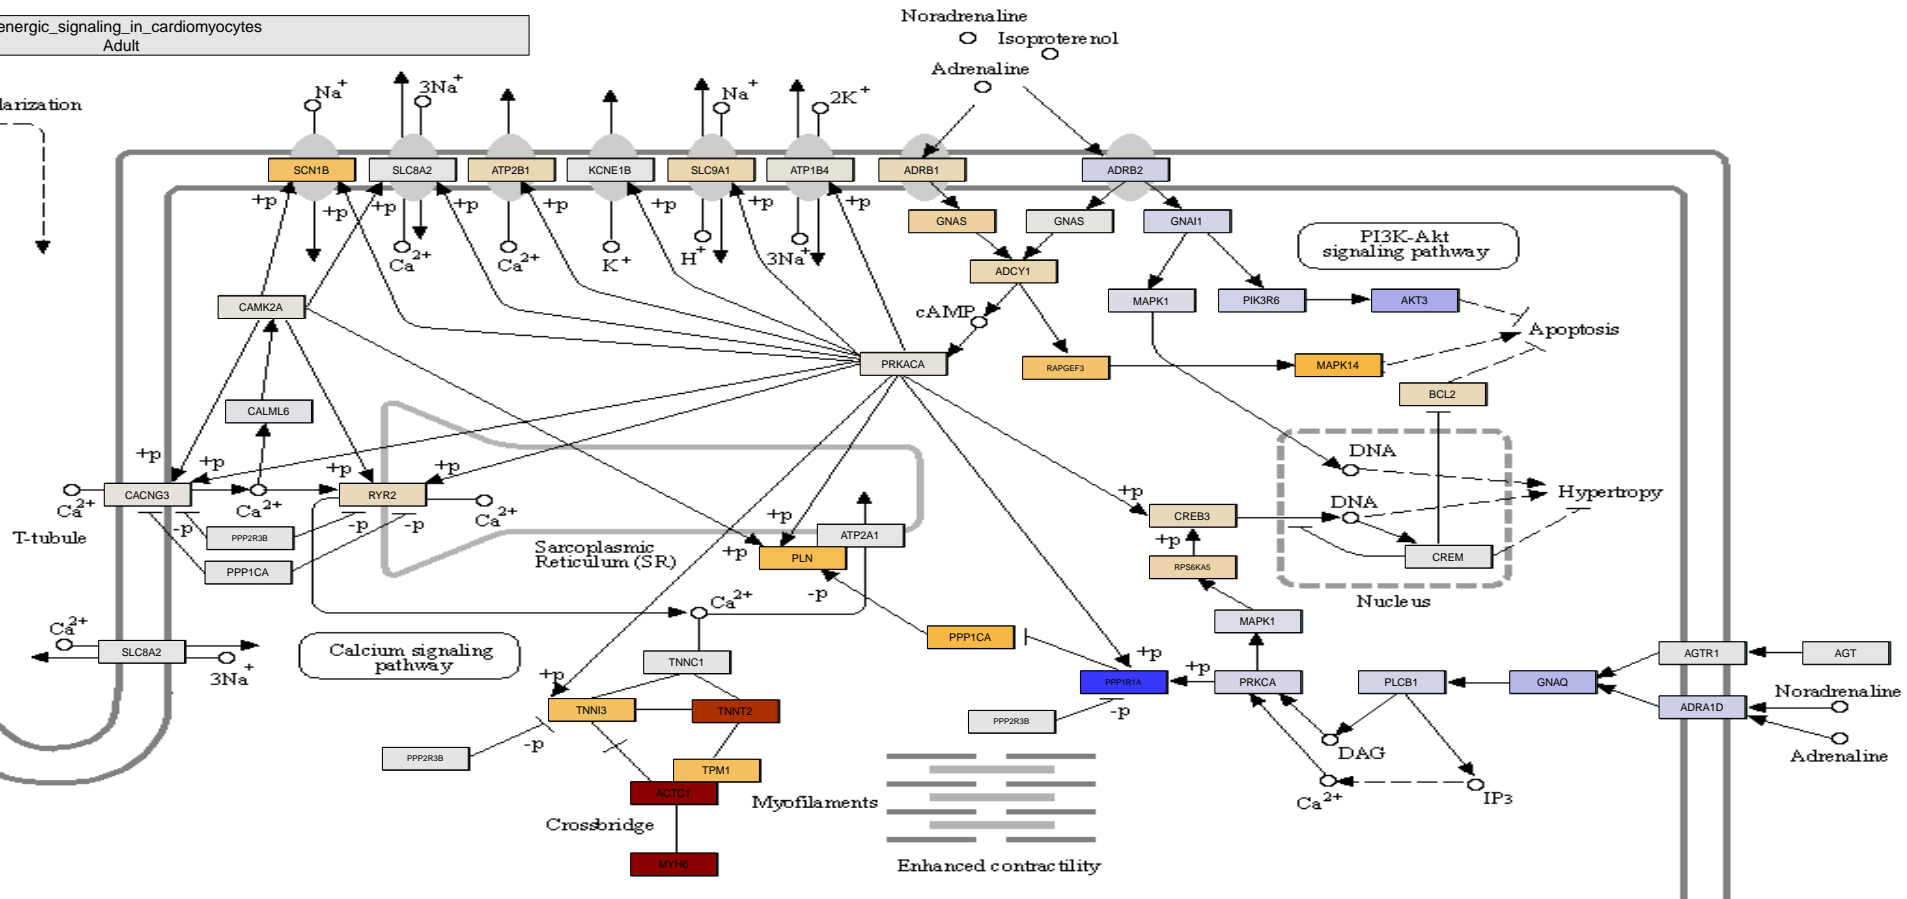



Adrenergic signaling in cardiomyocytes  
Late Adult

Depolarization

Sarcolemma

Cardiac myocyte

Cardiac muscle contraction

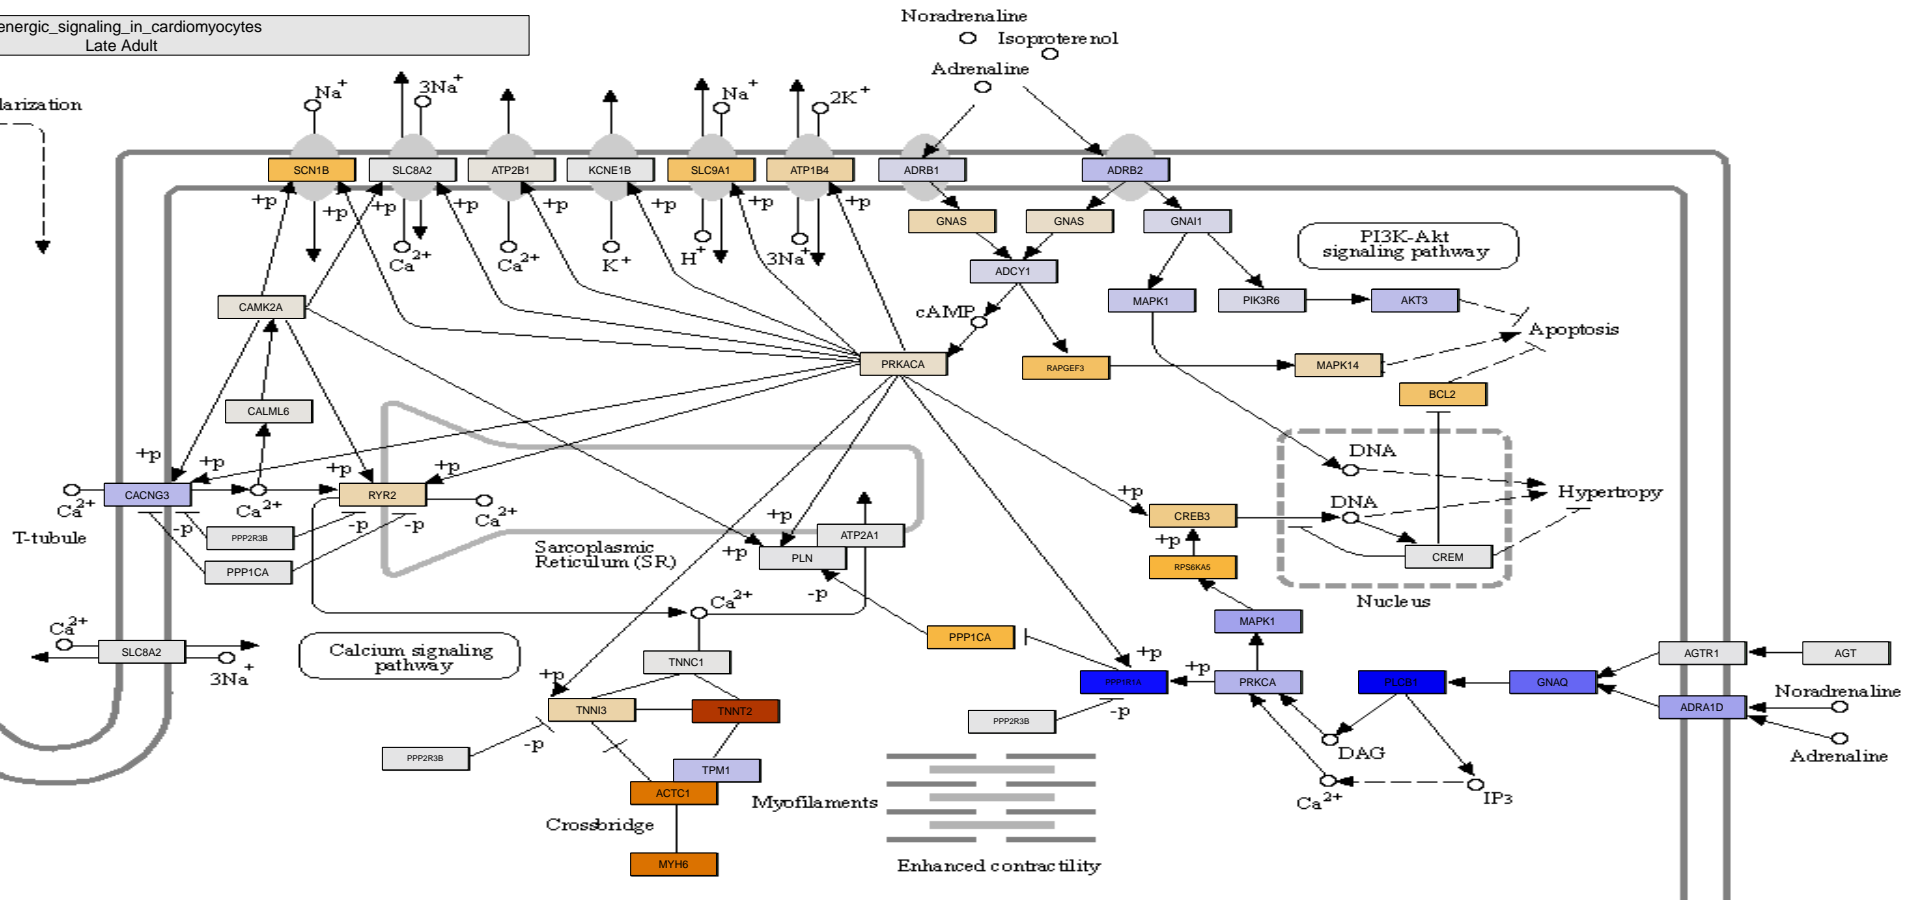

Supplement: s1 [file s1]
