# Supplementary material for: The Transcriptome and Methylome of the Developing and Aging Brain and Their Relations to Gliomas and Psychological Disorders
Source: MDPI journal article supplement (doi:10.3390/cells11030362), 2022-01-21

GnRH signaling pathway

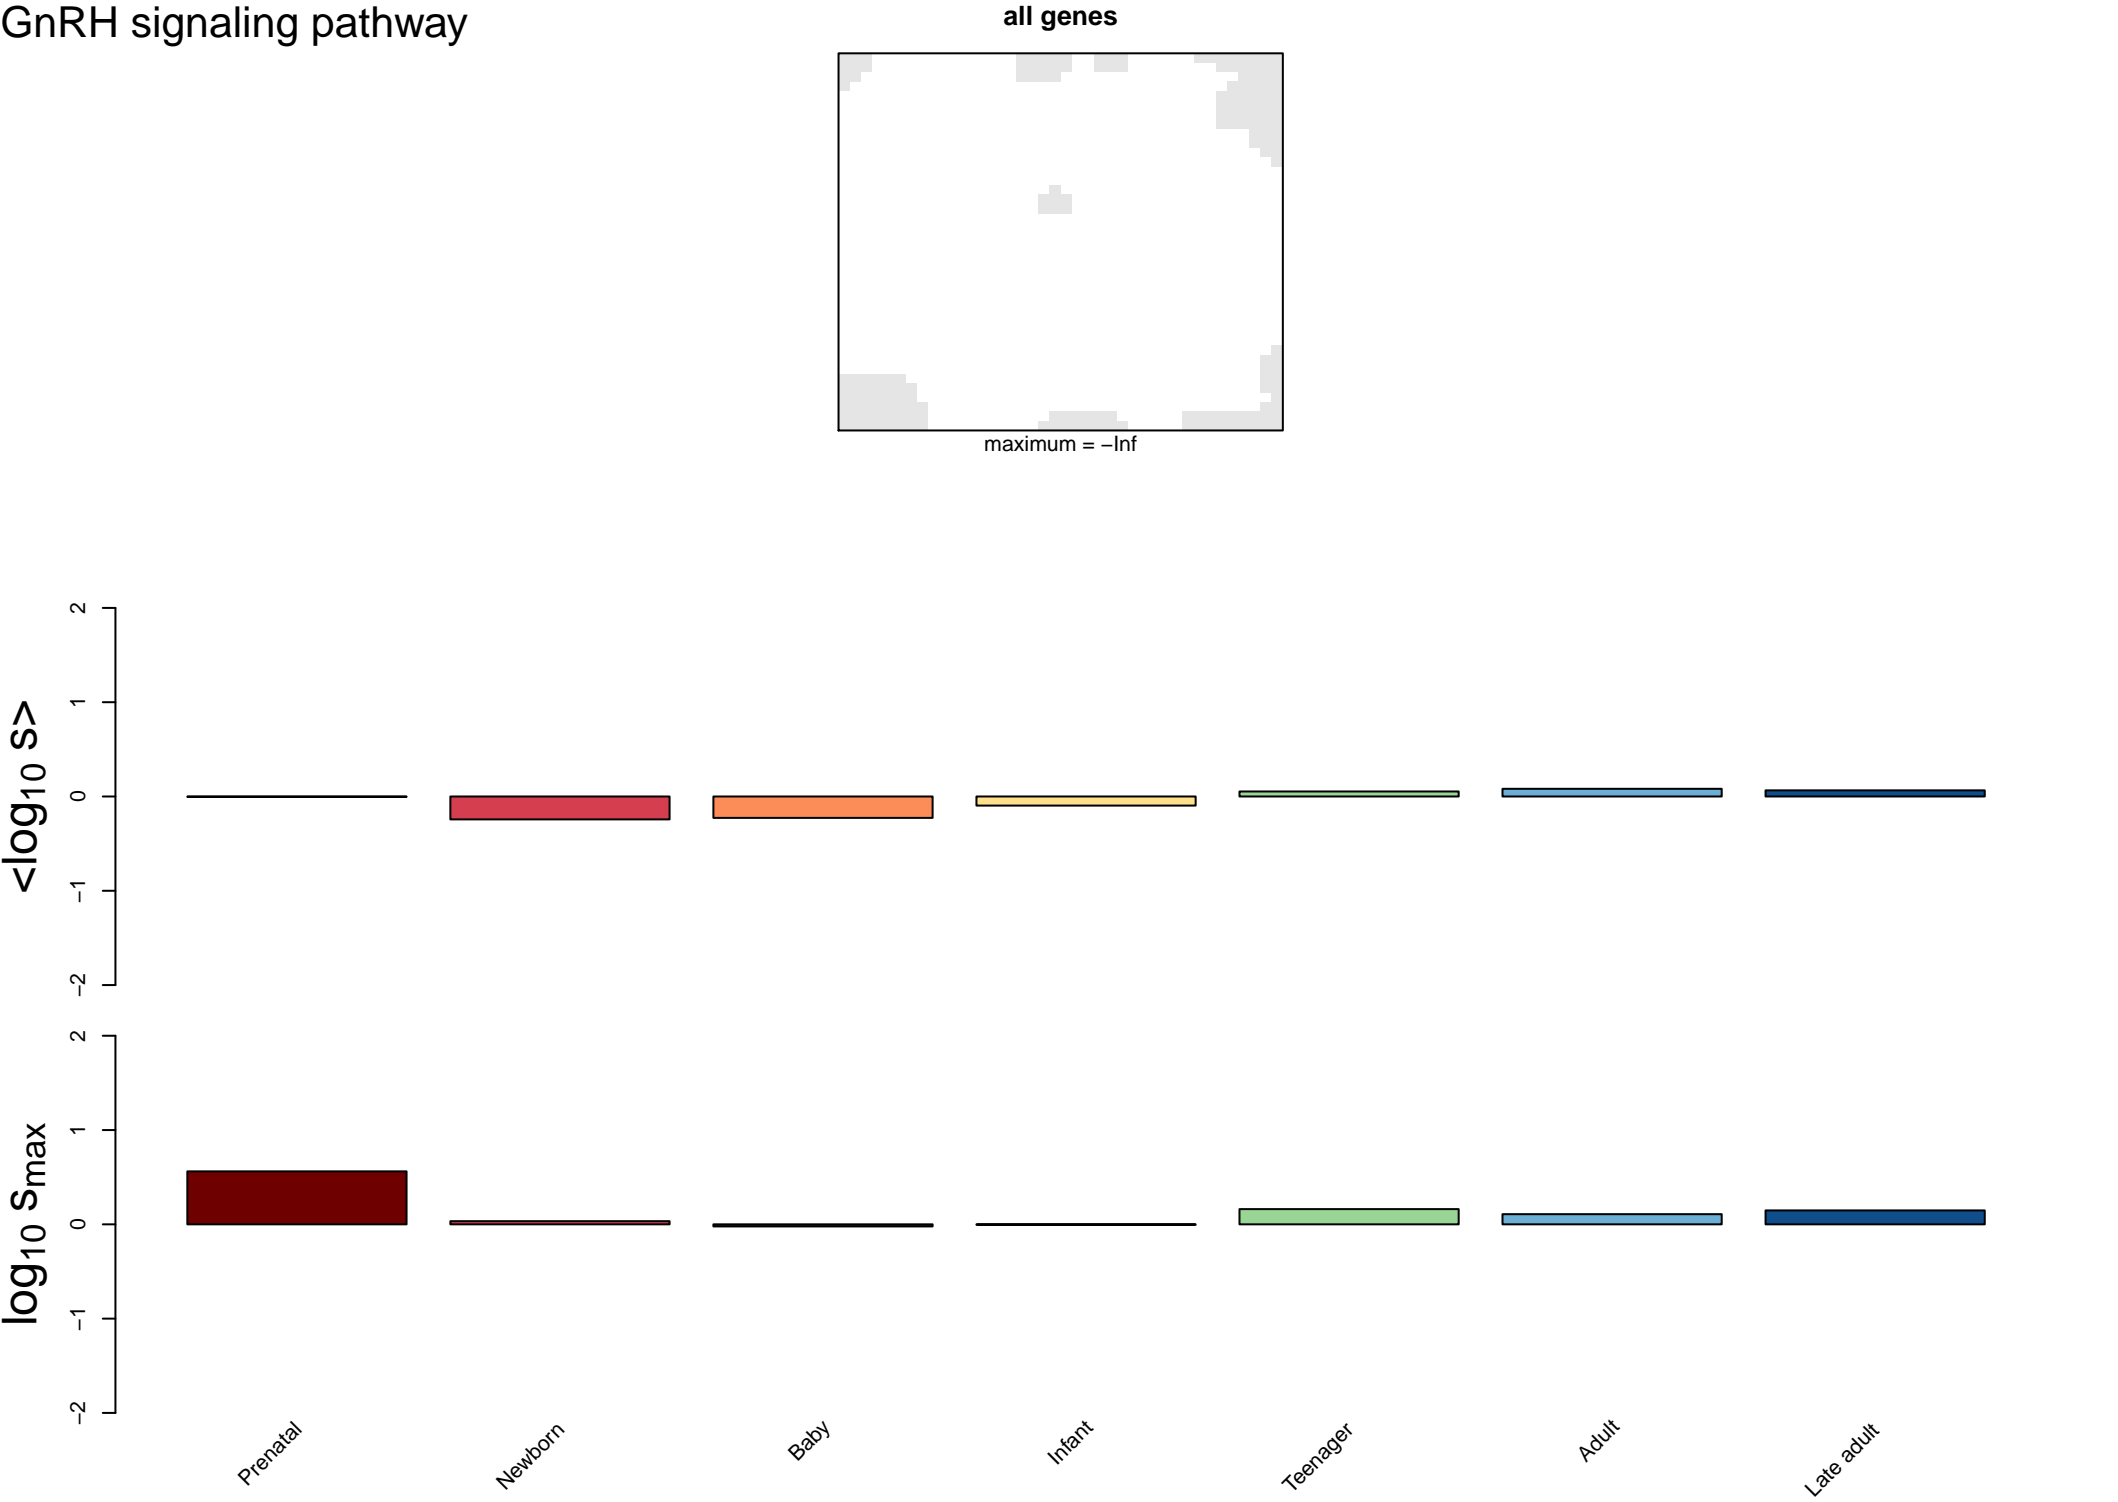

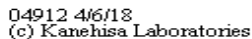

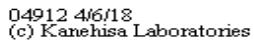

GnRH\_signaling\_pathway  
Prenatal

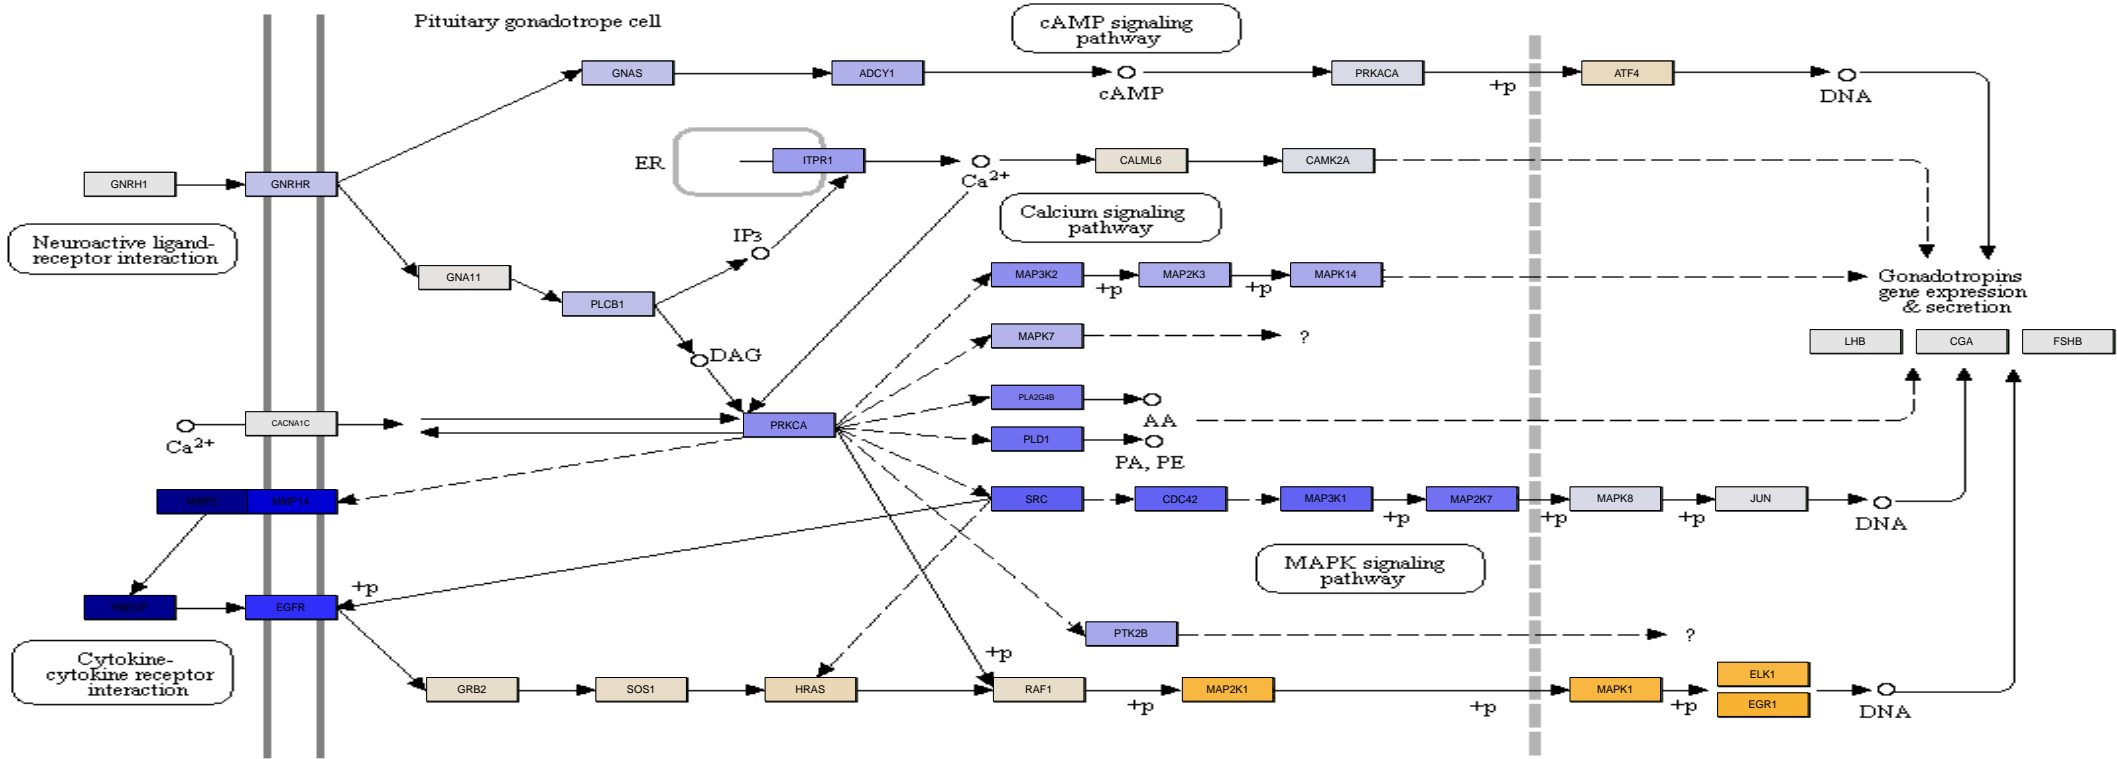



GnRH\_signaling\_pathway  
Baby

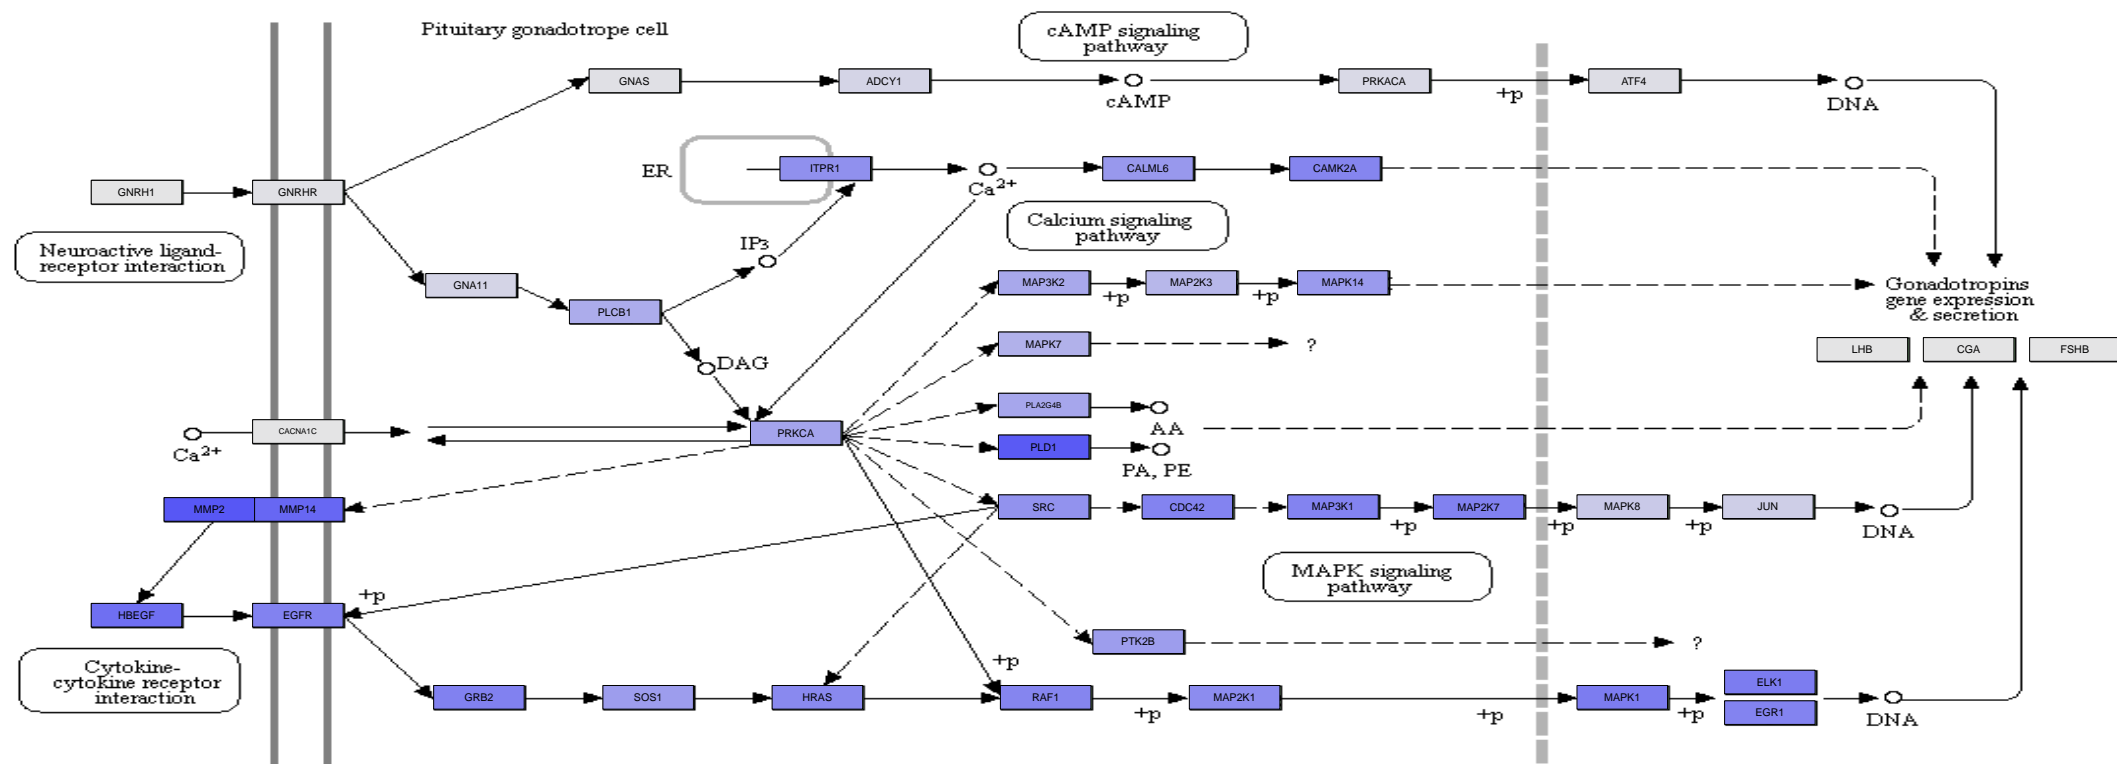

GnRH\_signaling\_pathway  
Infant

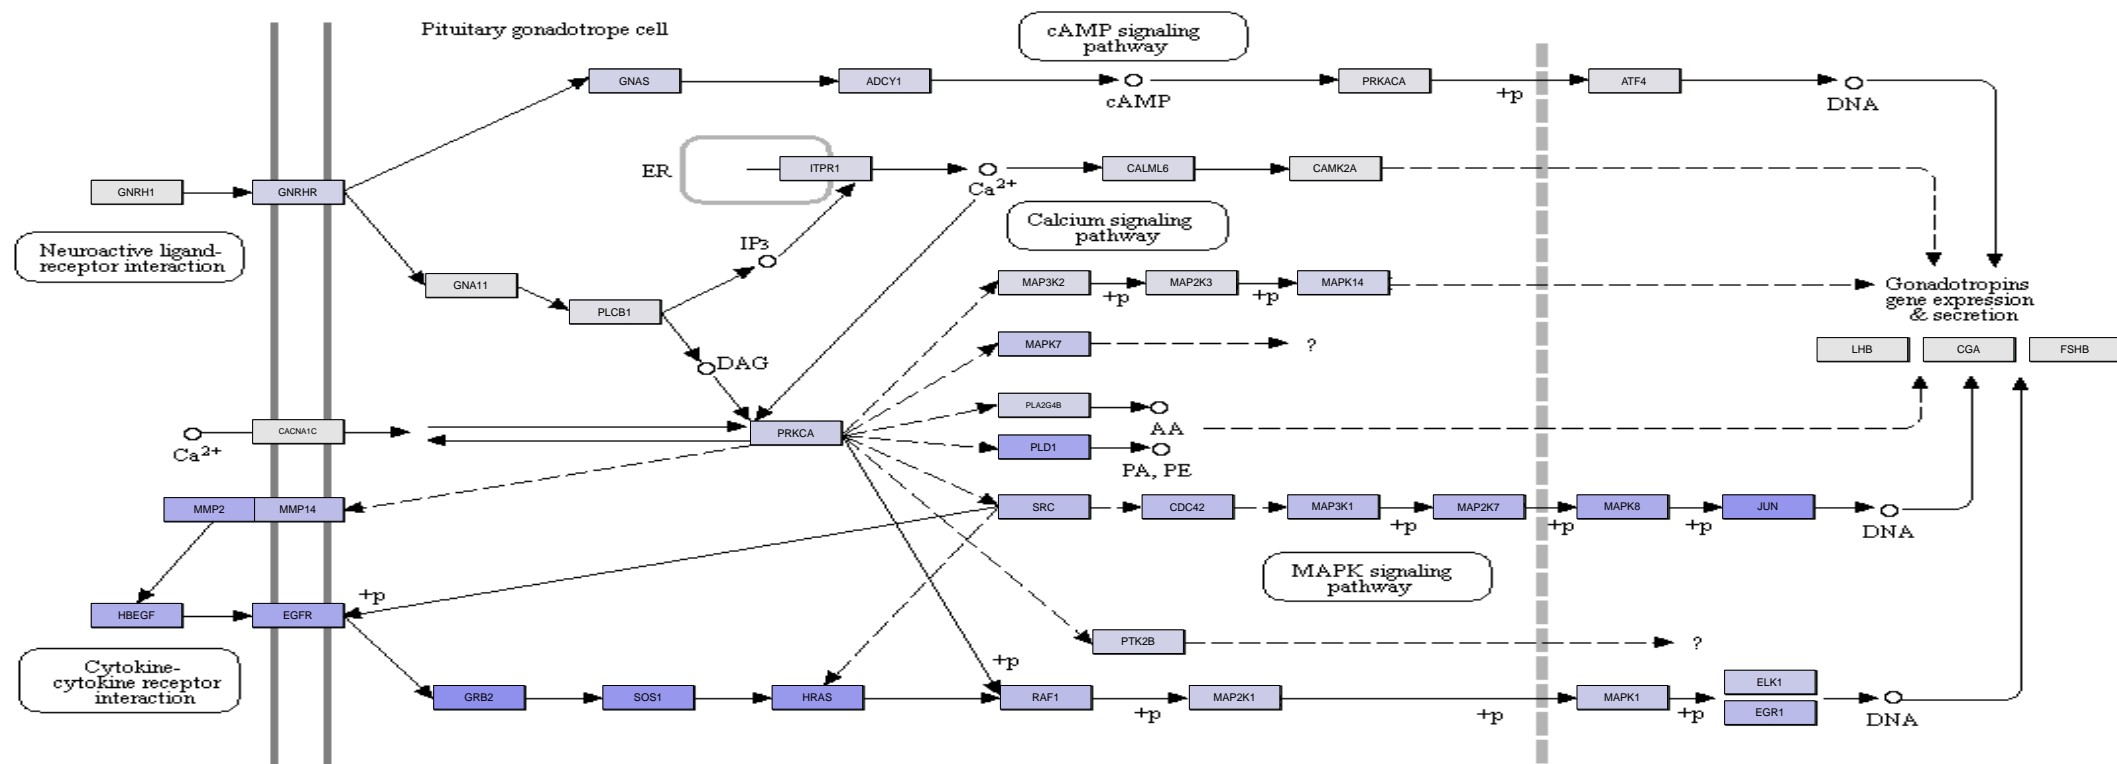

GnRH\_signaling\_pathway  
Teenager

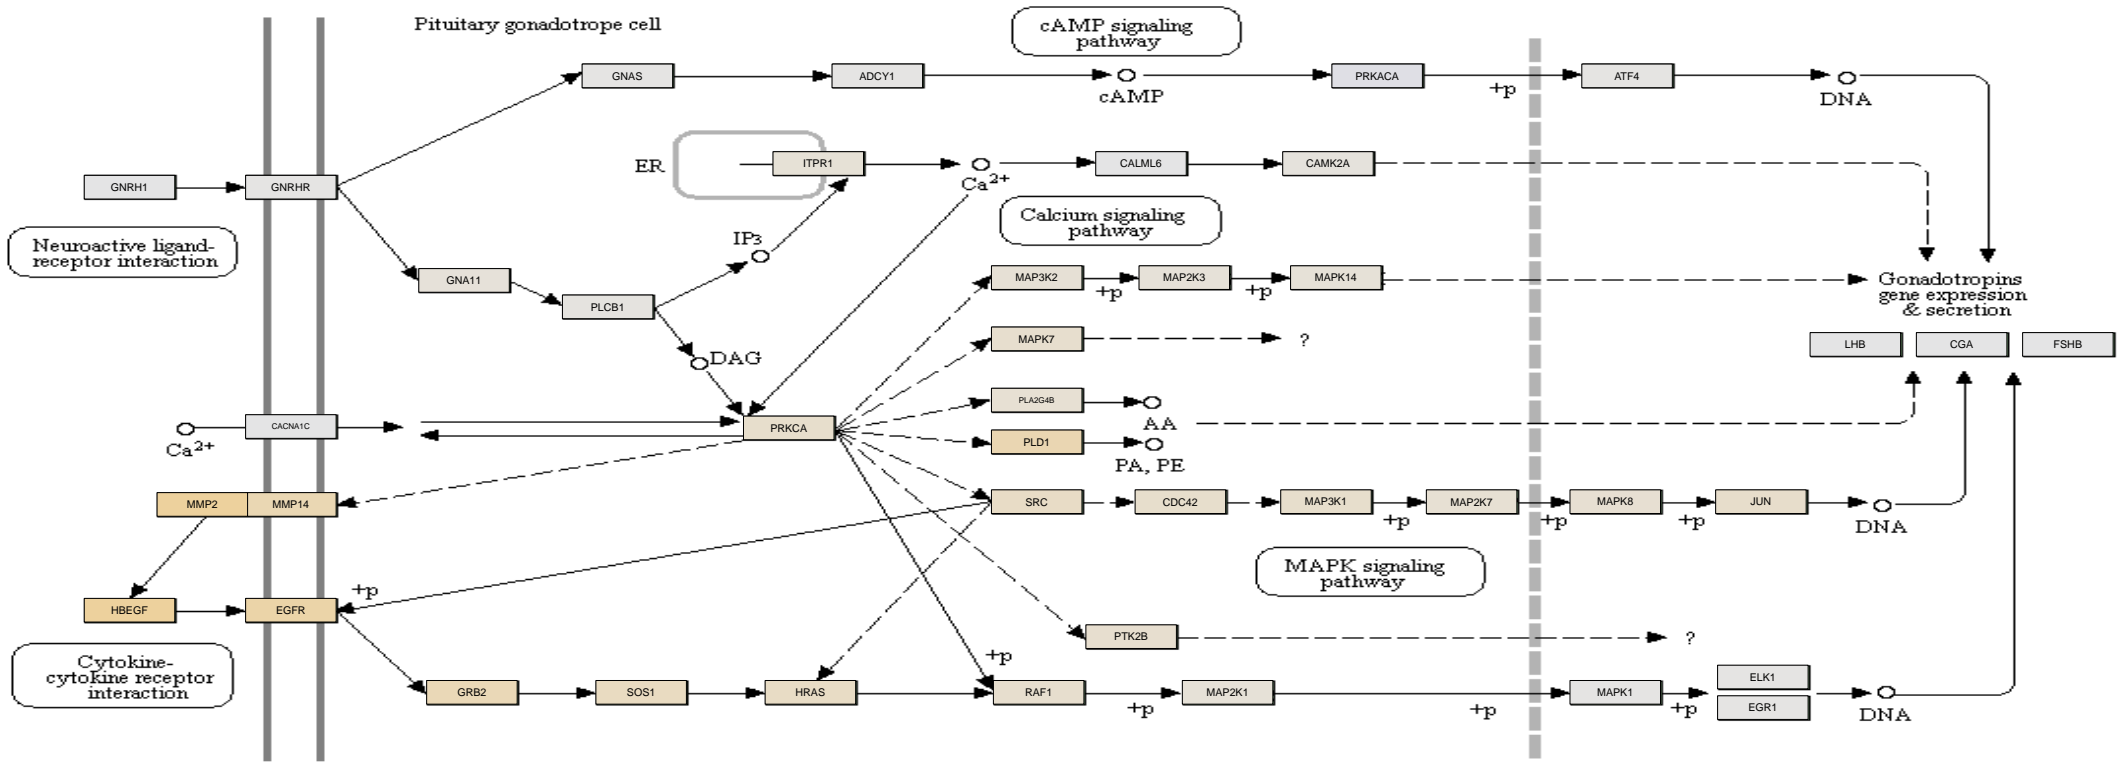



GnRH\_signaling\_pathway  
Adult

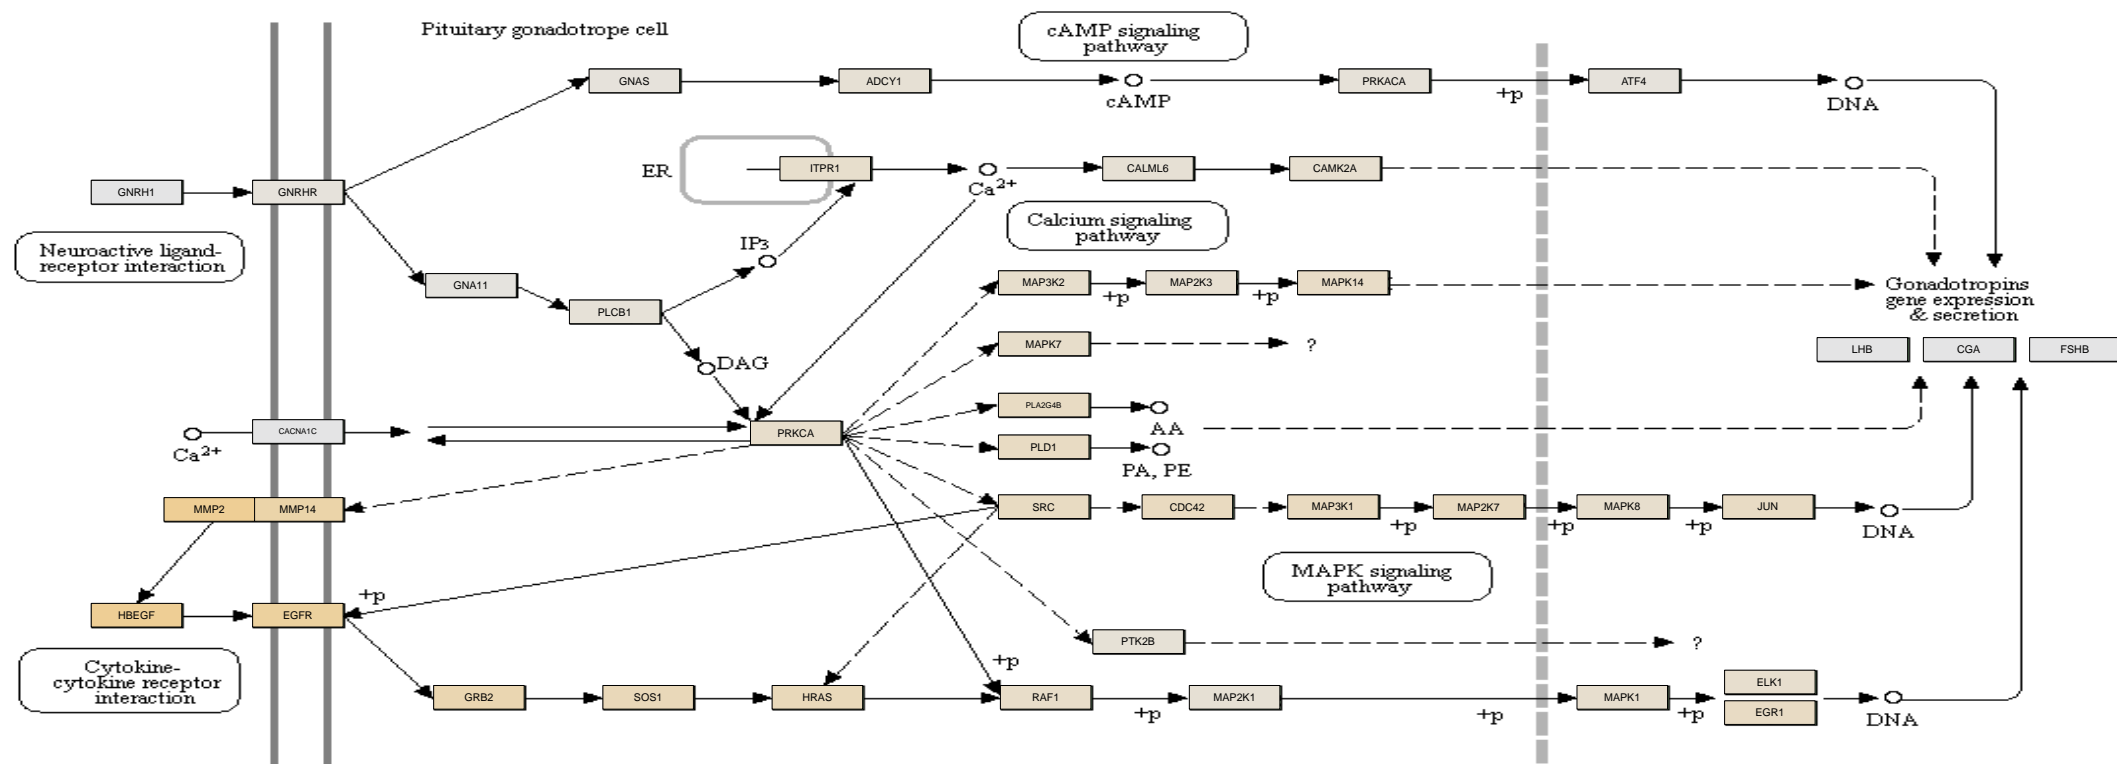

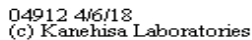

Supplement: s1 [file s1]
