# Supplementary material for: The Transcriptome and Methylome of the Developing and Aging Brain and Their Relations to Gliomas and Psychological Disorders
Source: MDPI journal article supplement (doi:10.3390/cells11030362), 2022-01-21

B cell receptor signaling pathway

all genes

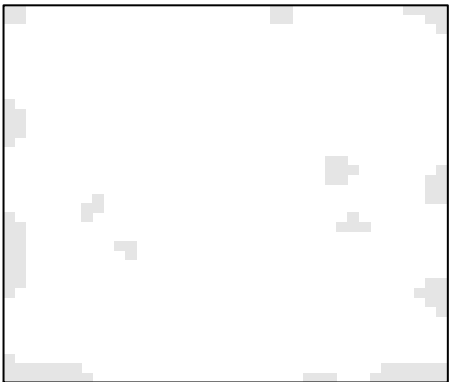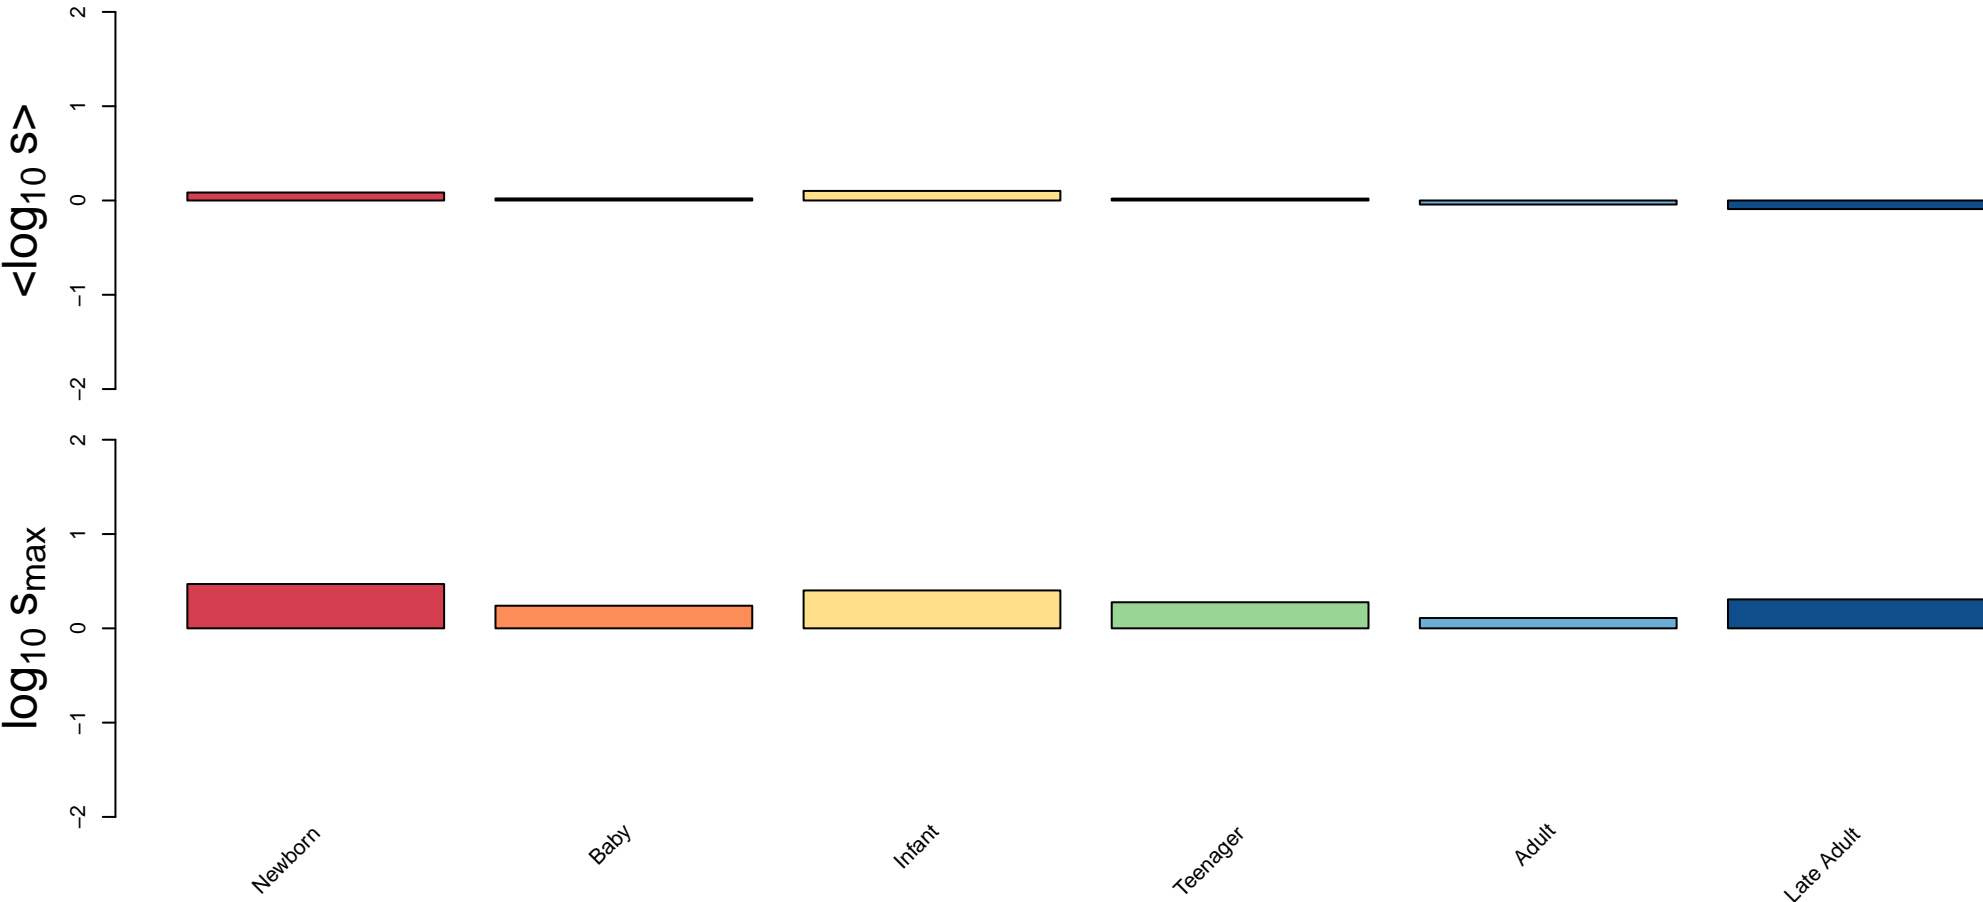

B\_cell\_receptor\_signaling\_pathway  
genes with data

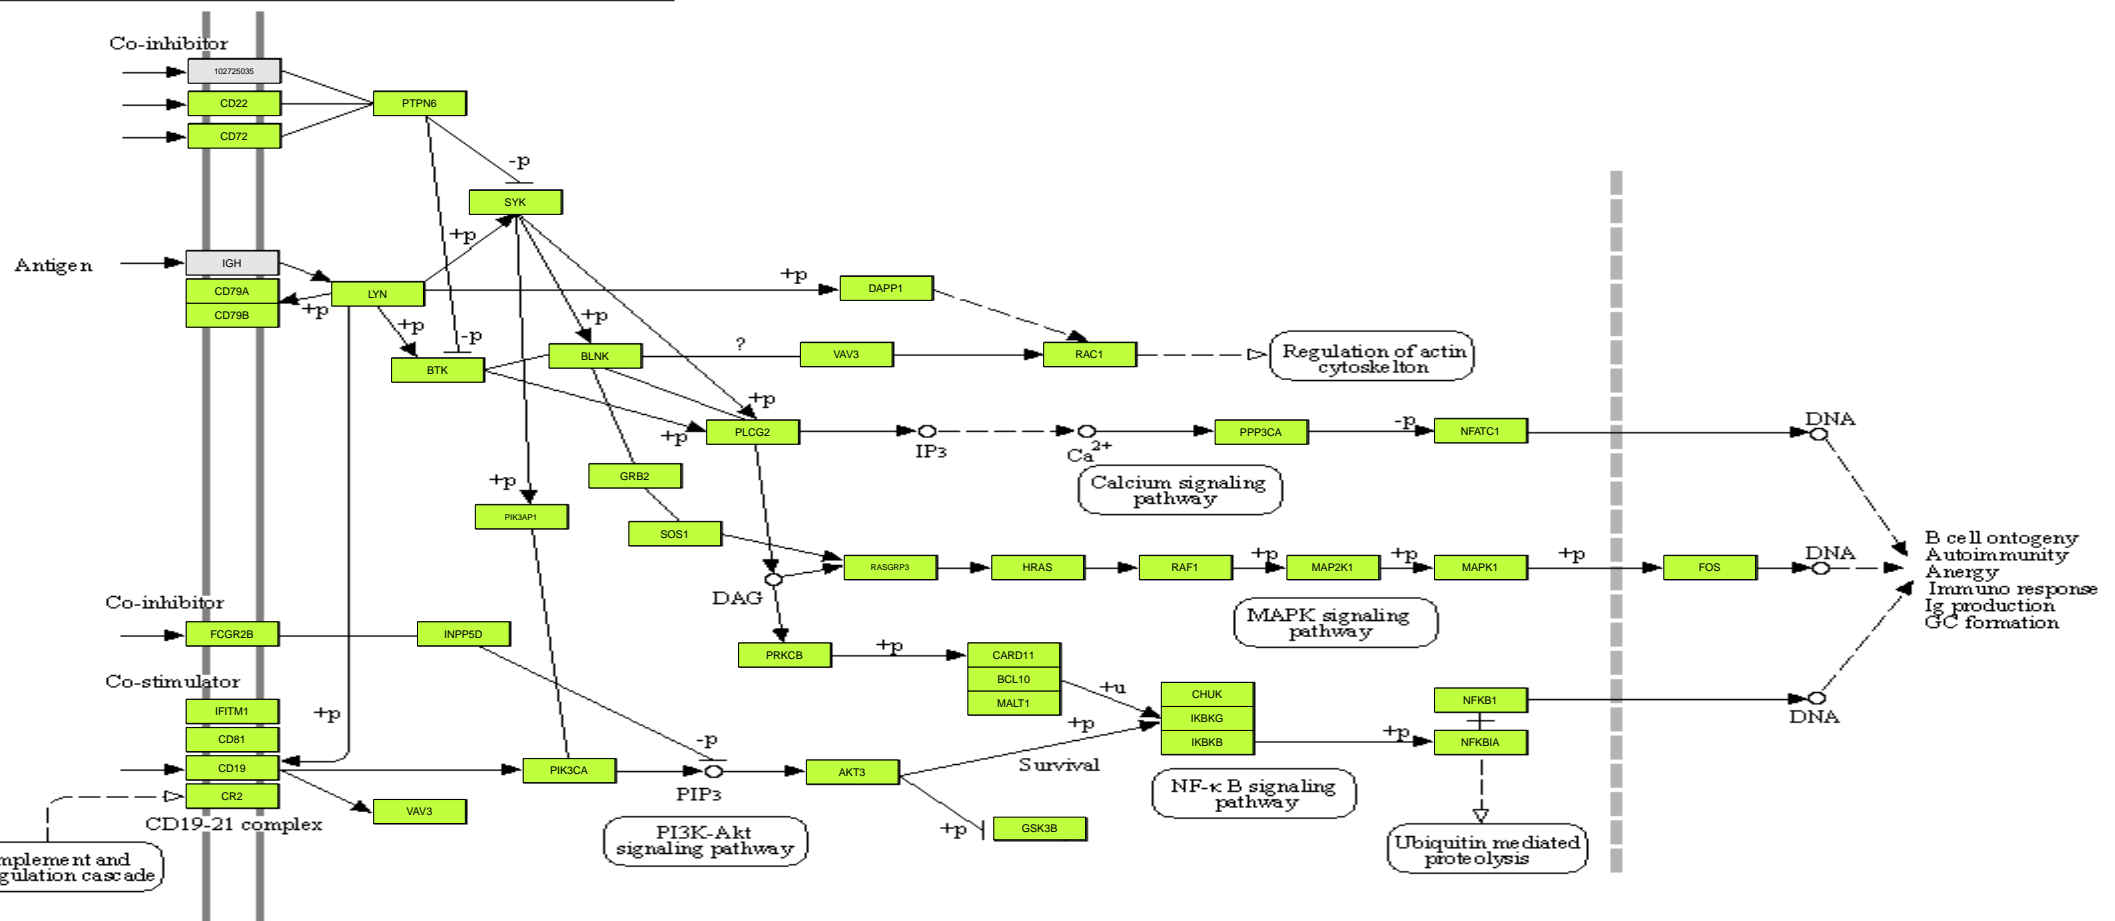

B\_cell\_receptor\_signaling\_pathway  
sink nodes

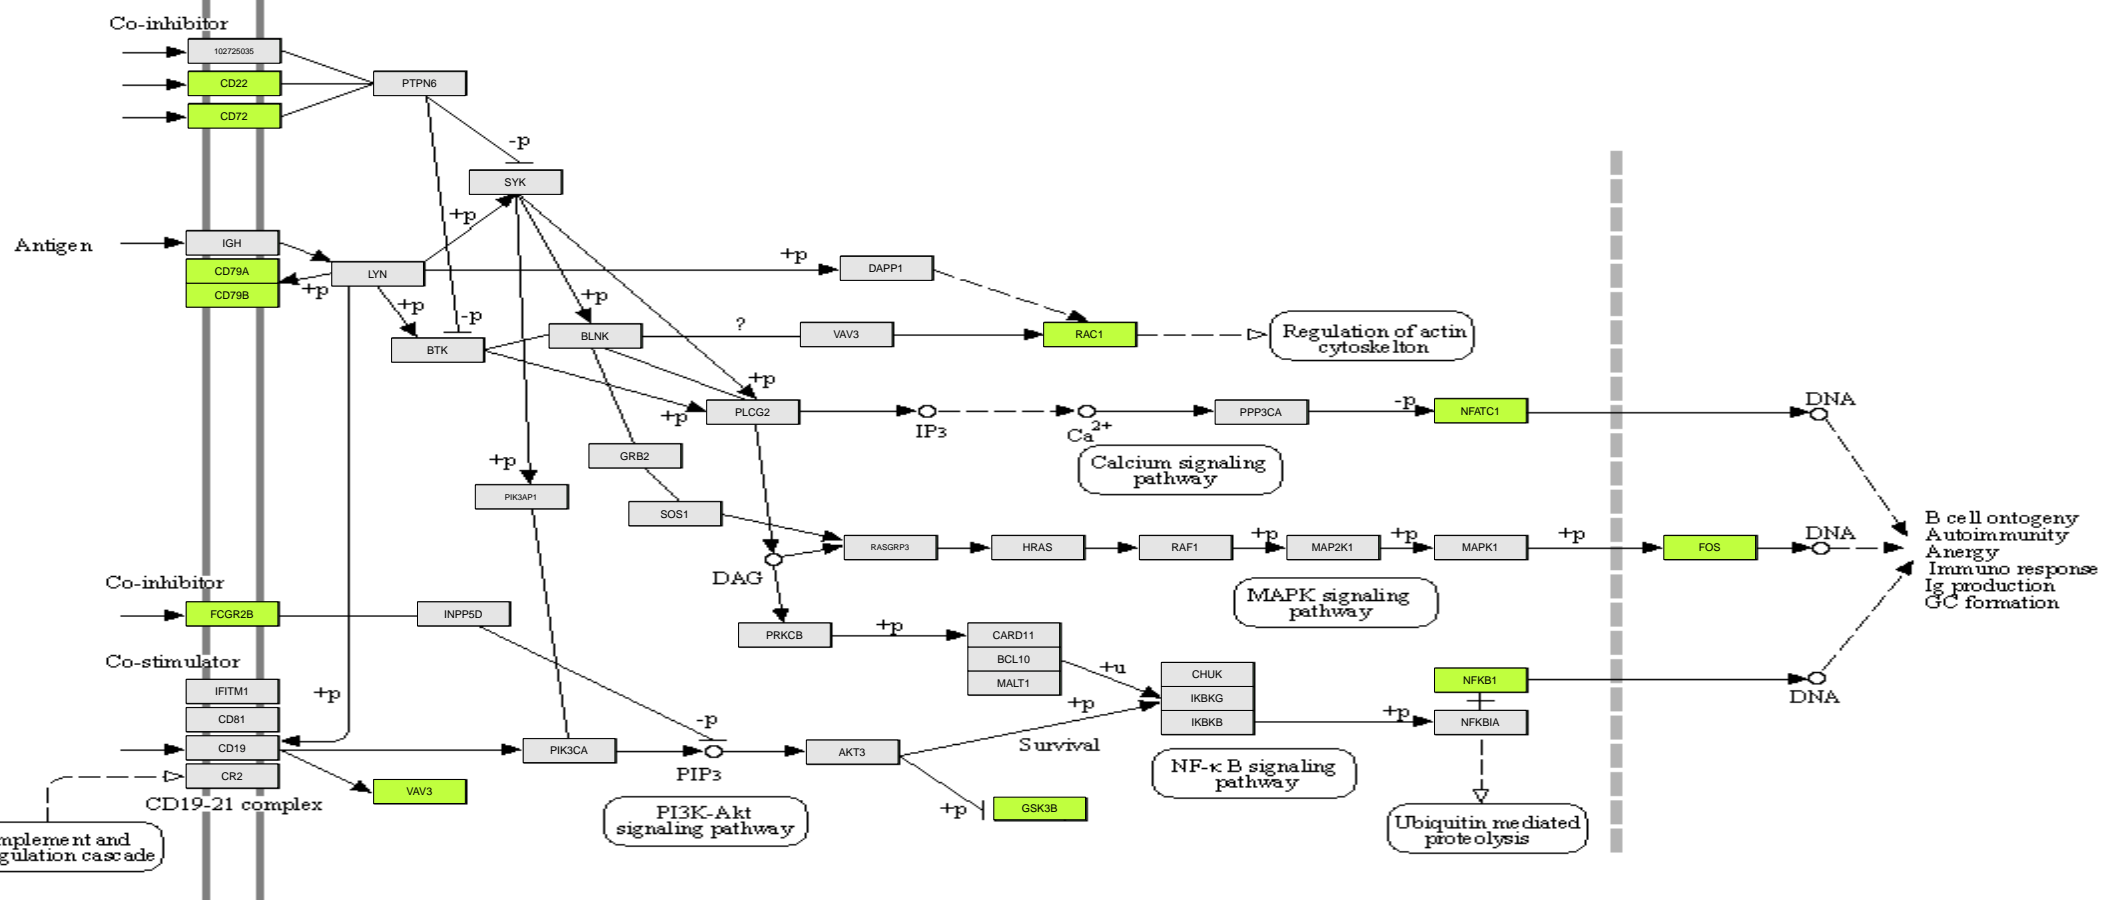

B\_cell\_receptor\_signaling\_pathway  
Newborn

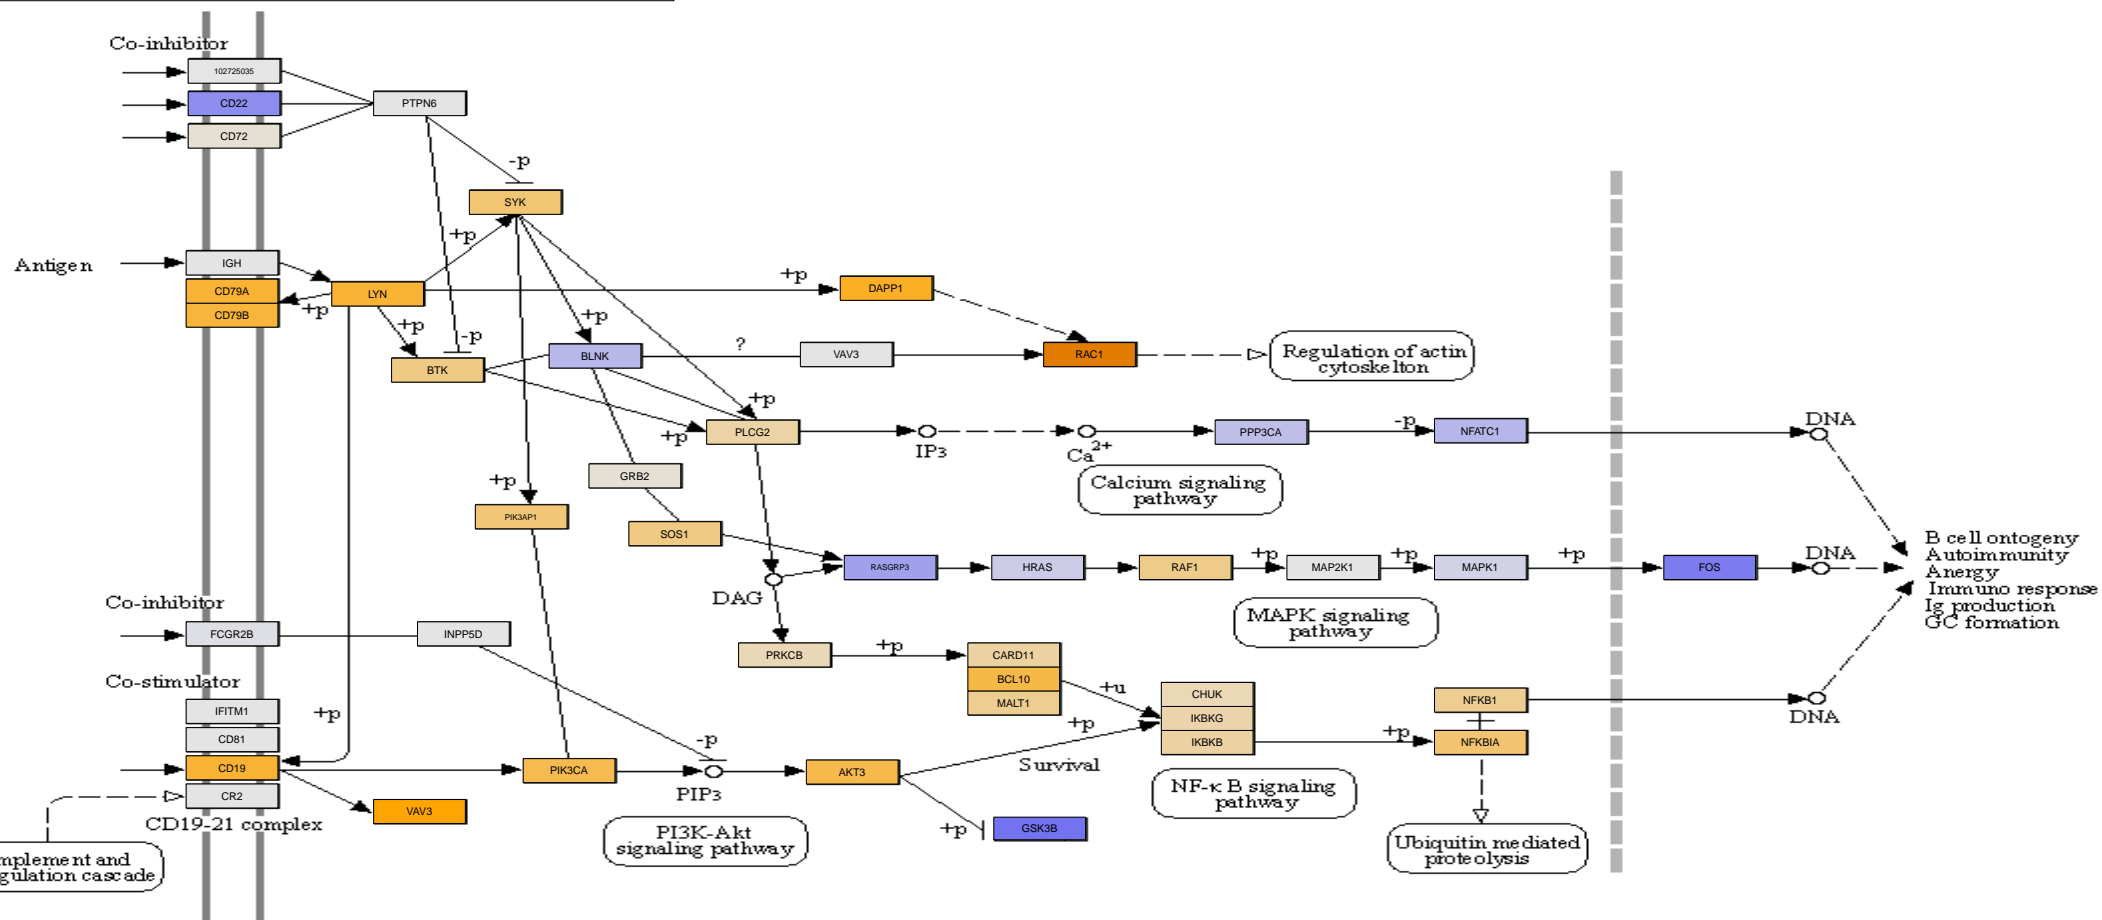

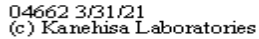

# B\_cell\_receptor\_signaling\_pathway Infant

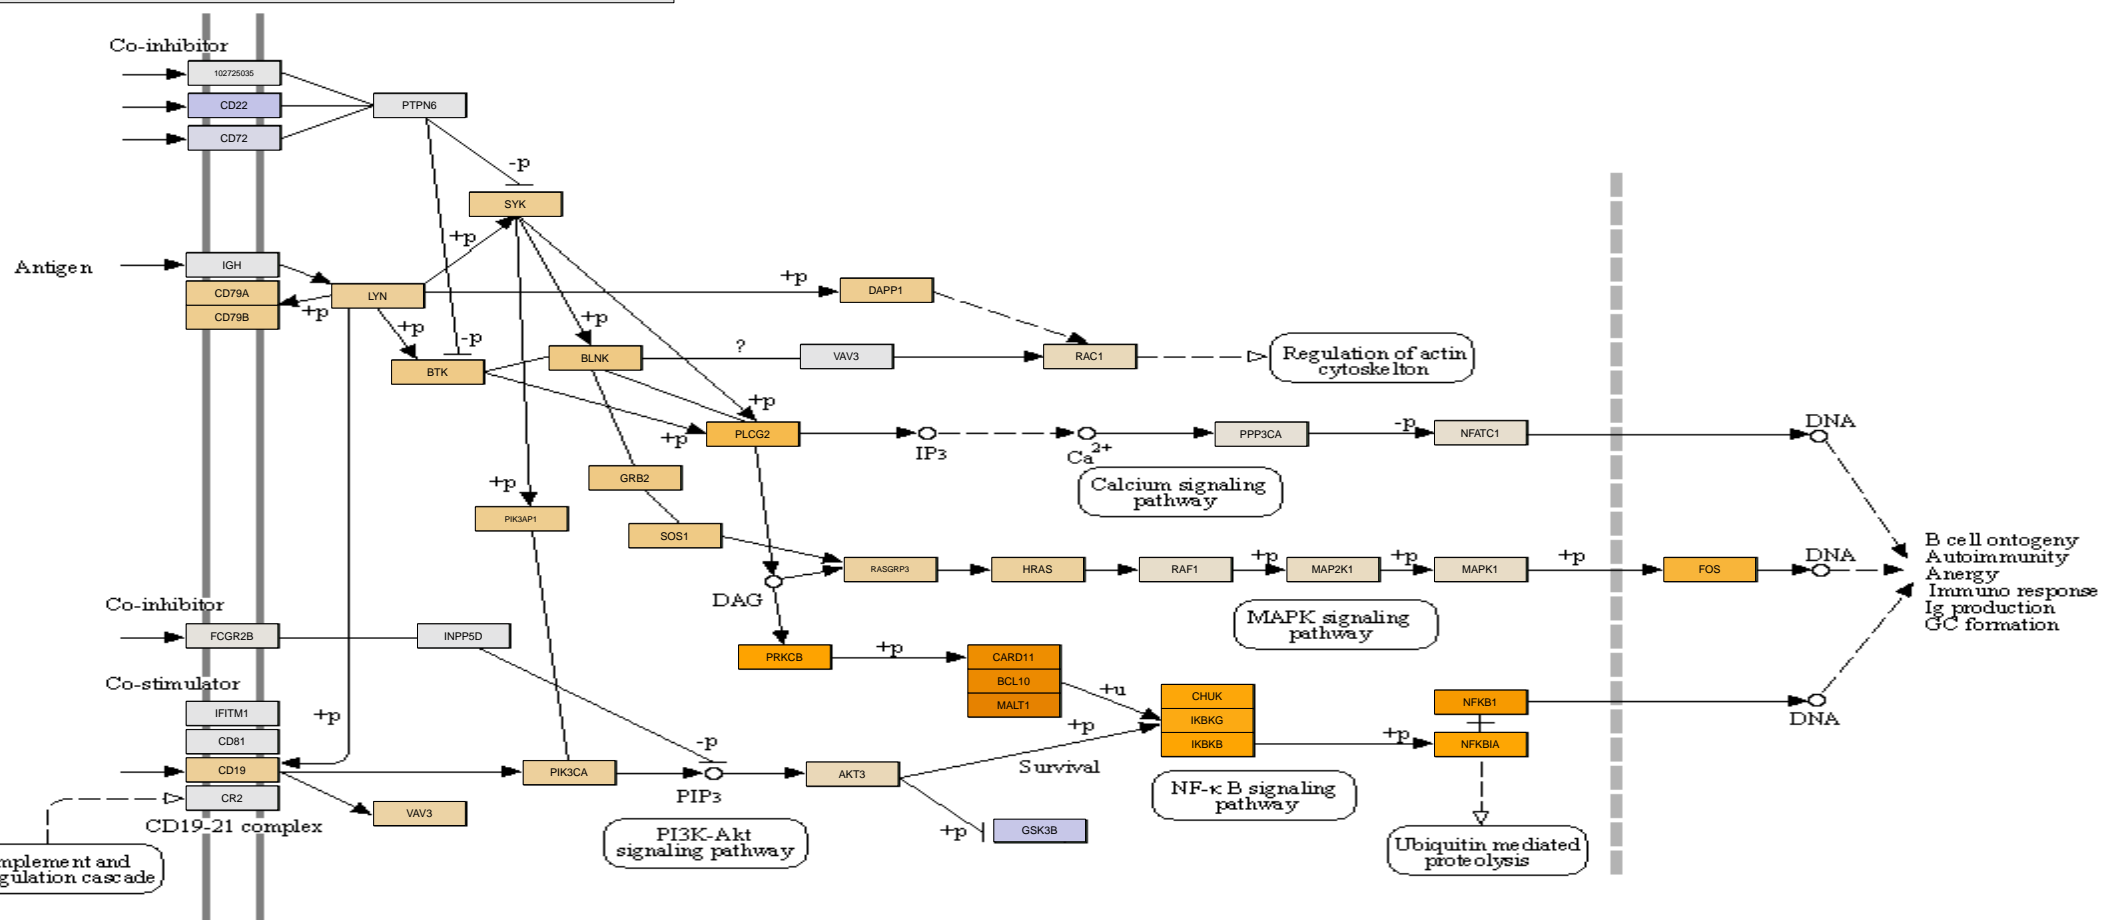

B\_cell\_receptor\_signaling\_pathway  
Teenager

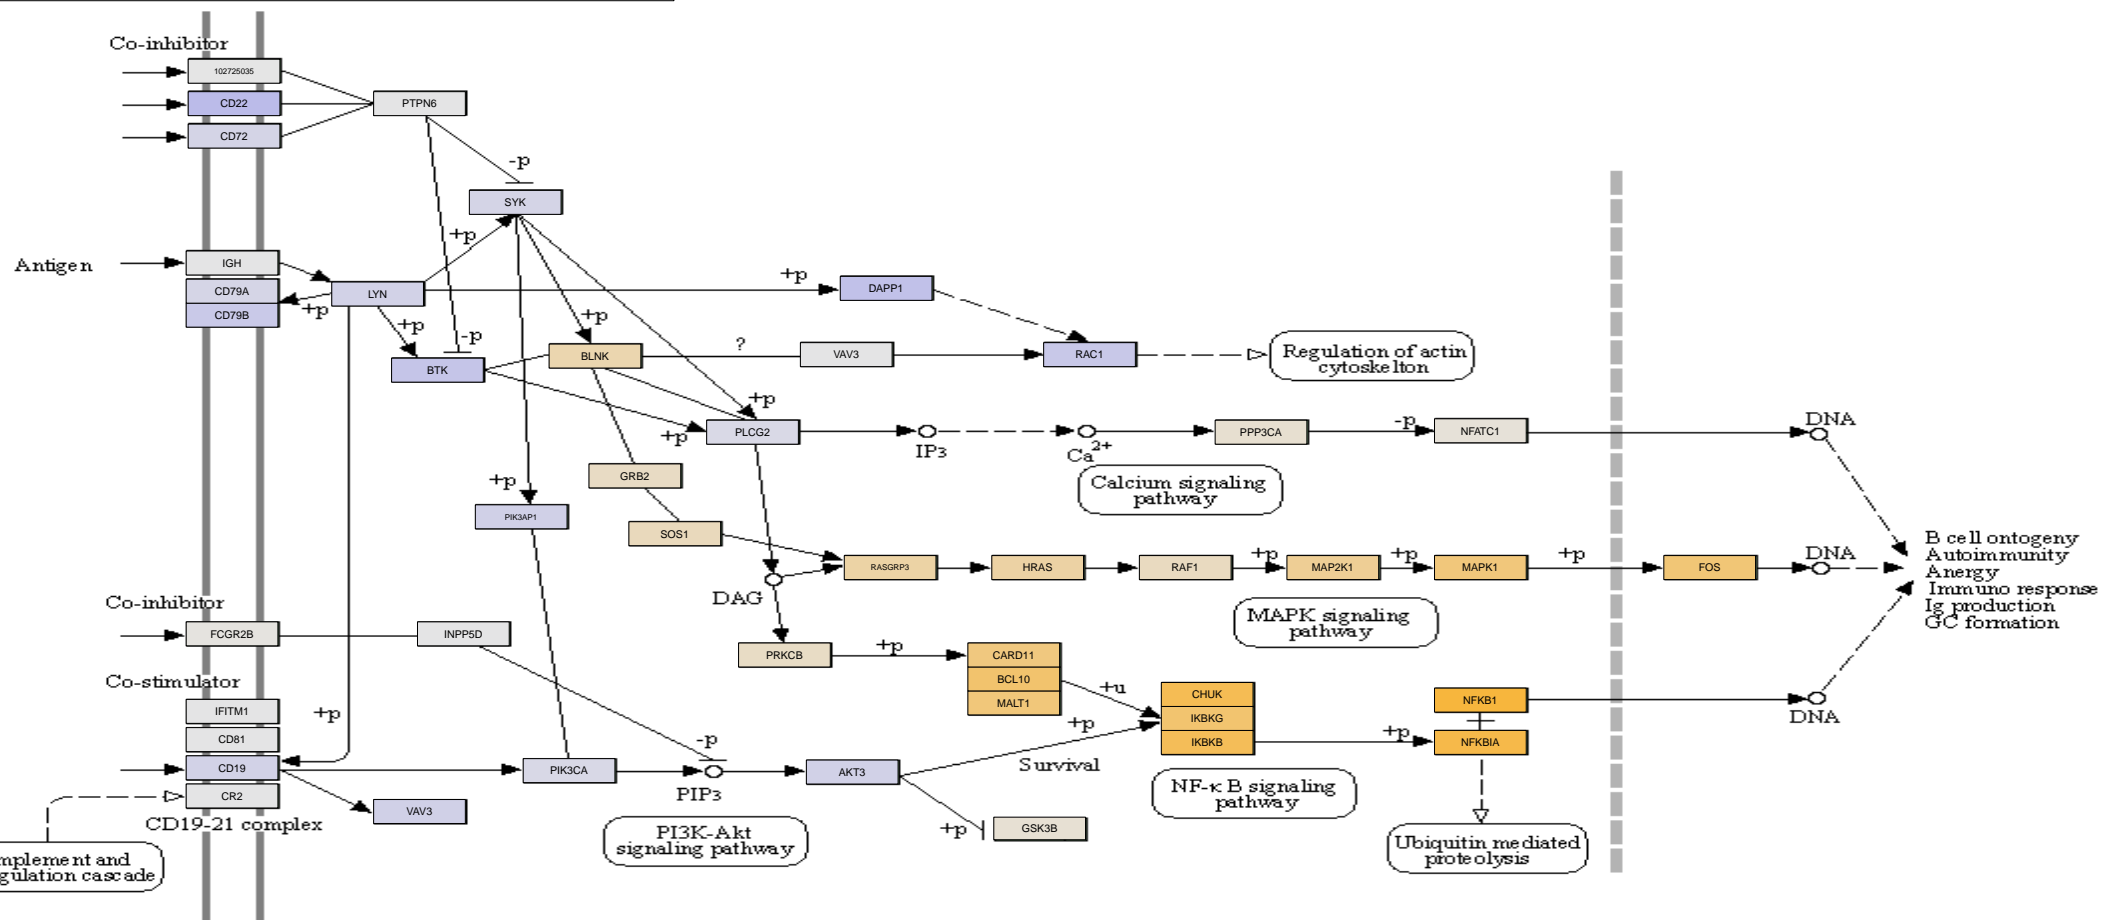

B\_cell\_receptor\_signaling\_pathway  
Adult

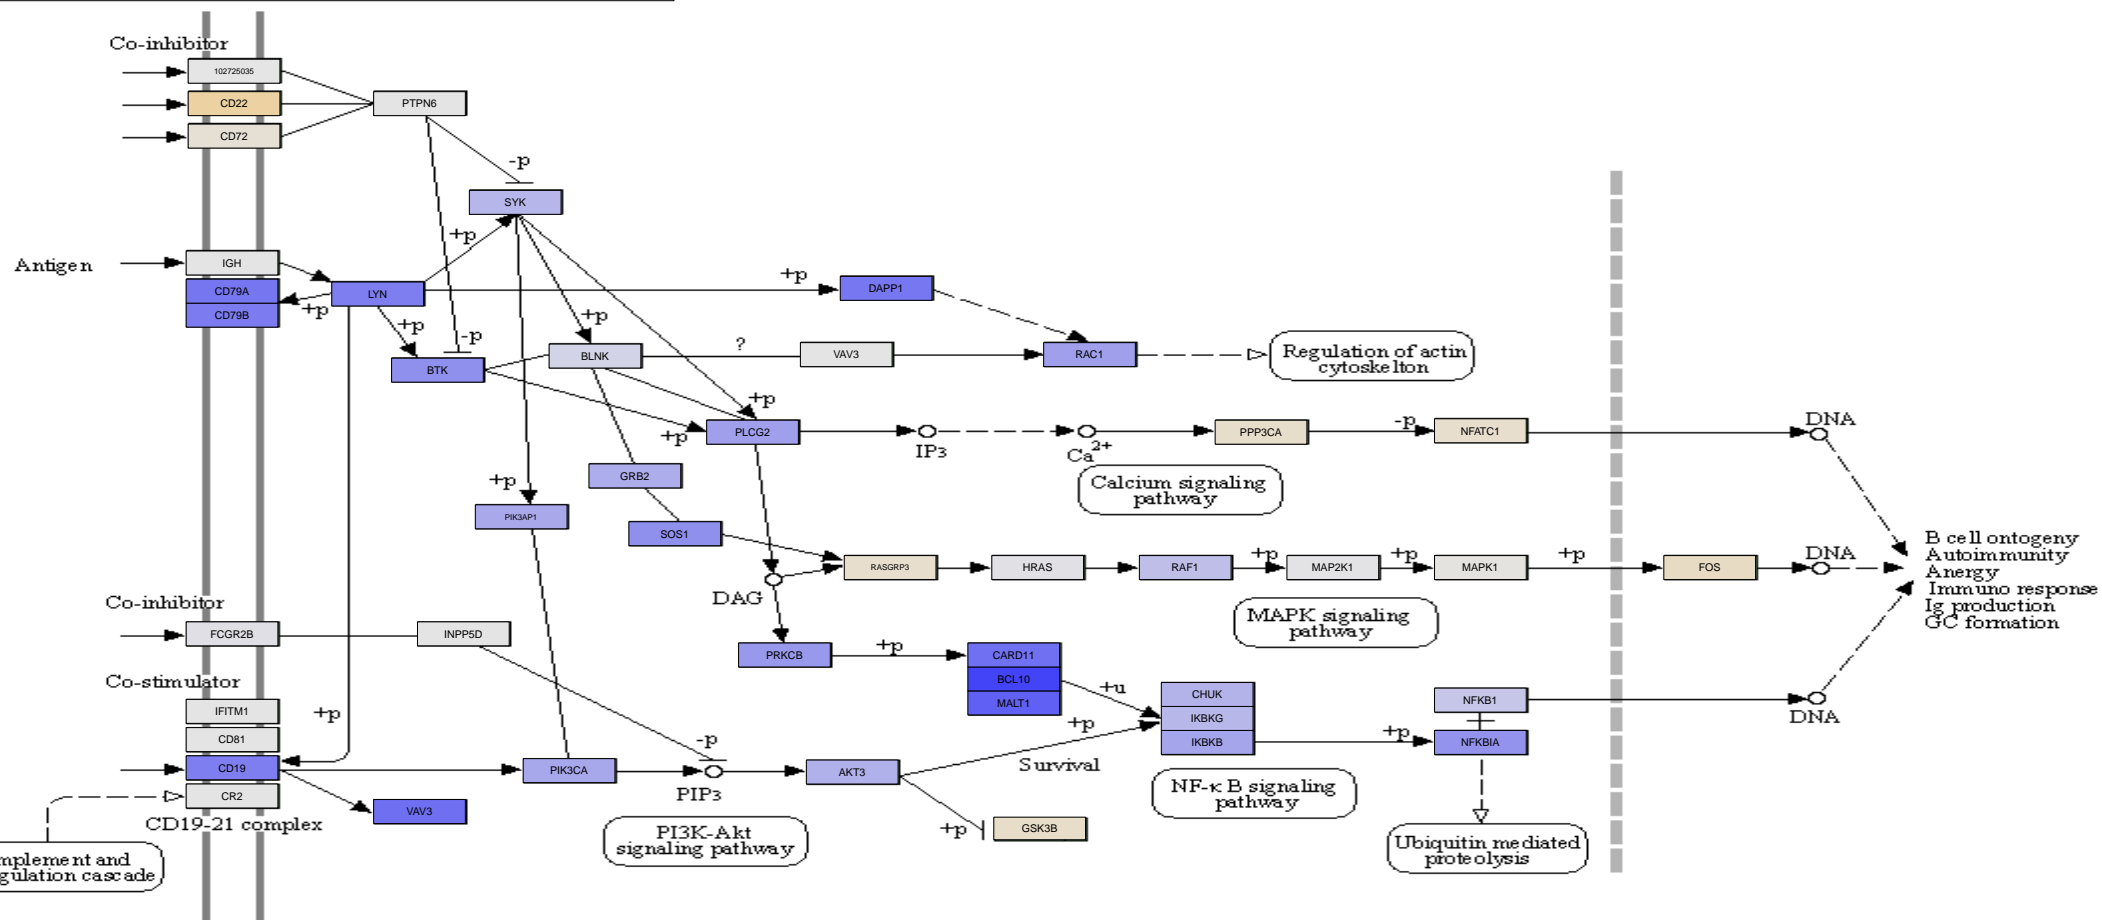



B\_cell\_receptor\_signaling\_pathway  
Late Adult

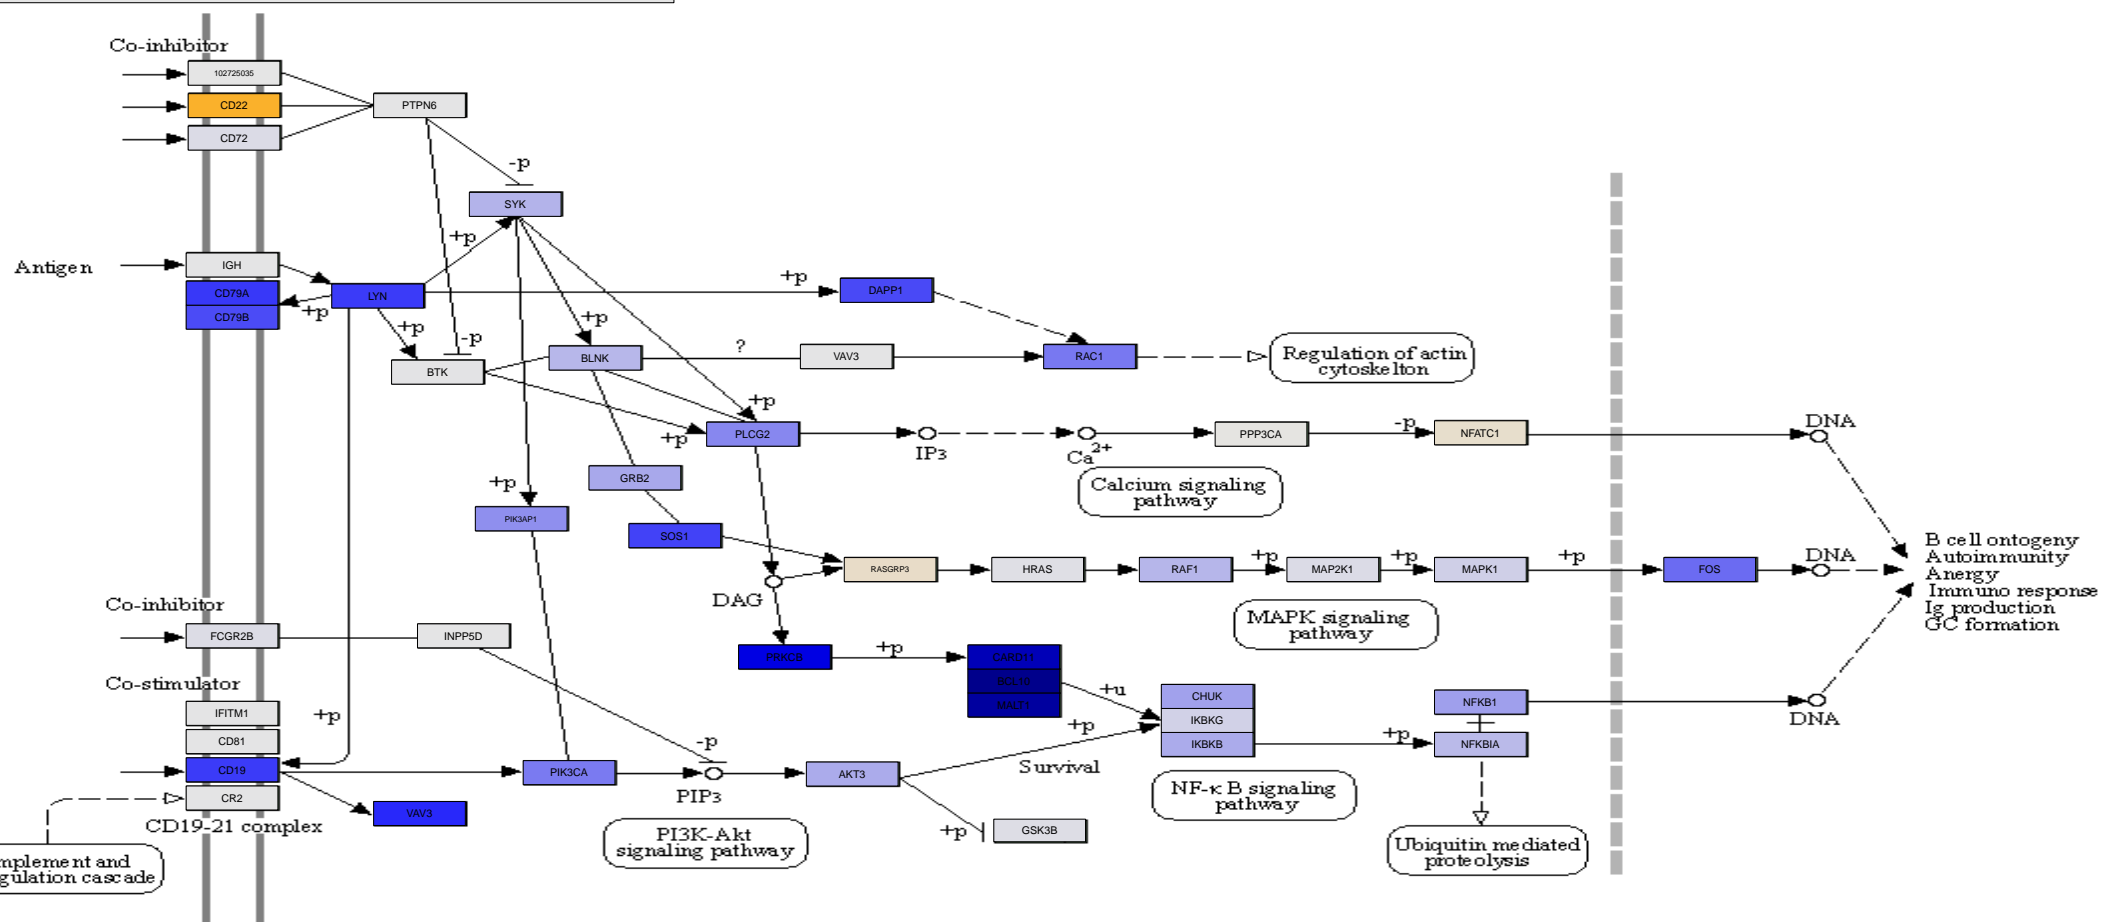

Supplement: s1 [file s1]
