# Supplementary material for: The Transcriptome and Methylome of the Developing and Aging Brain and Their Relations to Gliomas and Psychological Disorders
Source: MDPI journal article supplement (doi:10.3390/cells11030362), 2022-01-21

Estrogen signaling pathway

all genes

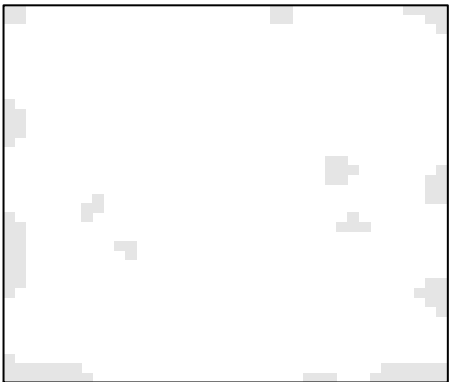

maximum = -Inf

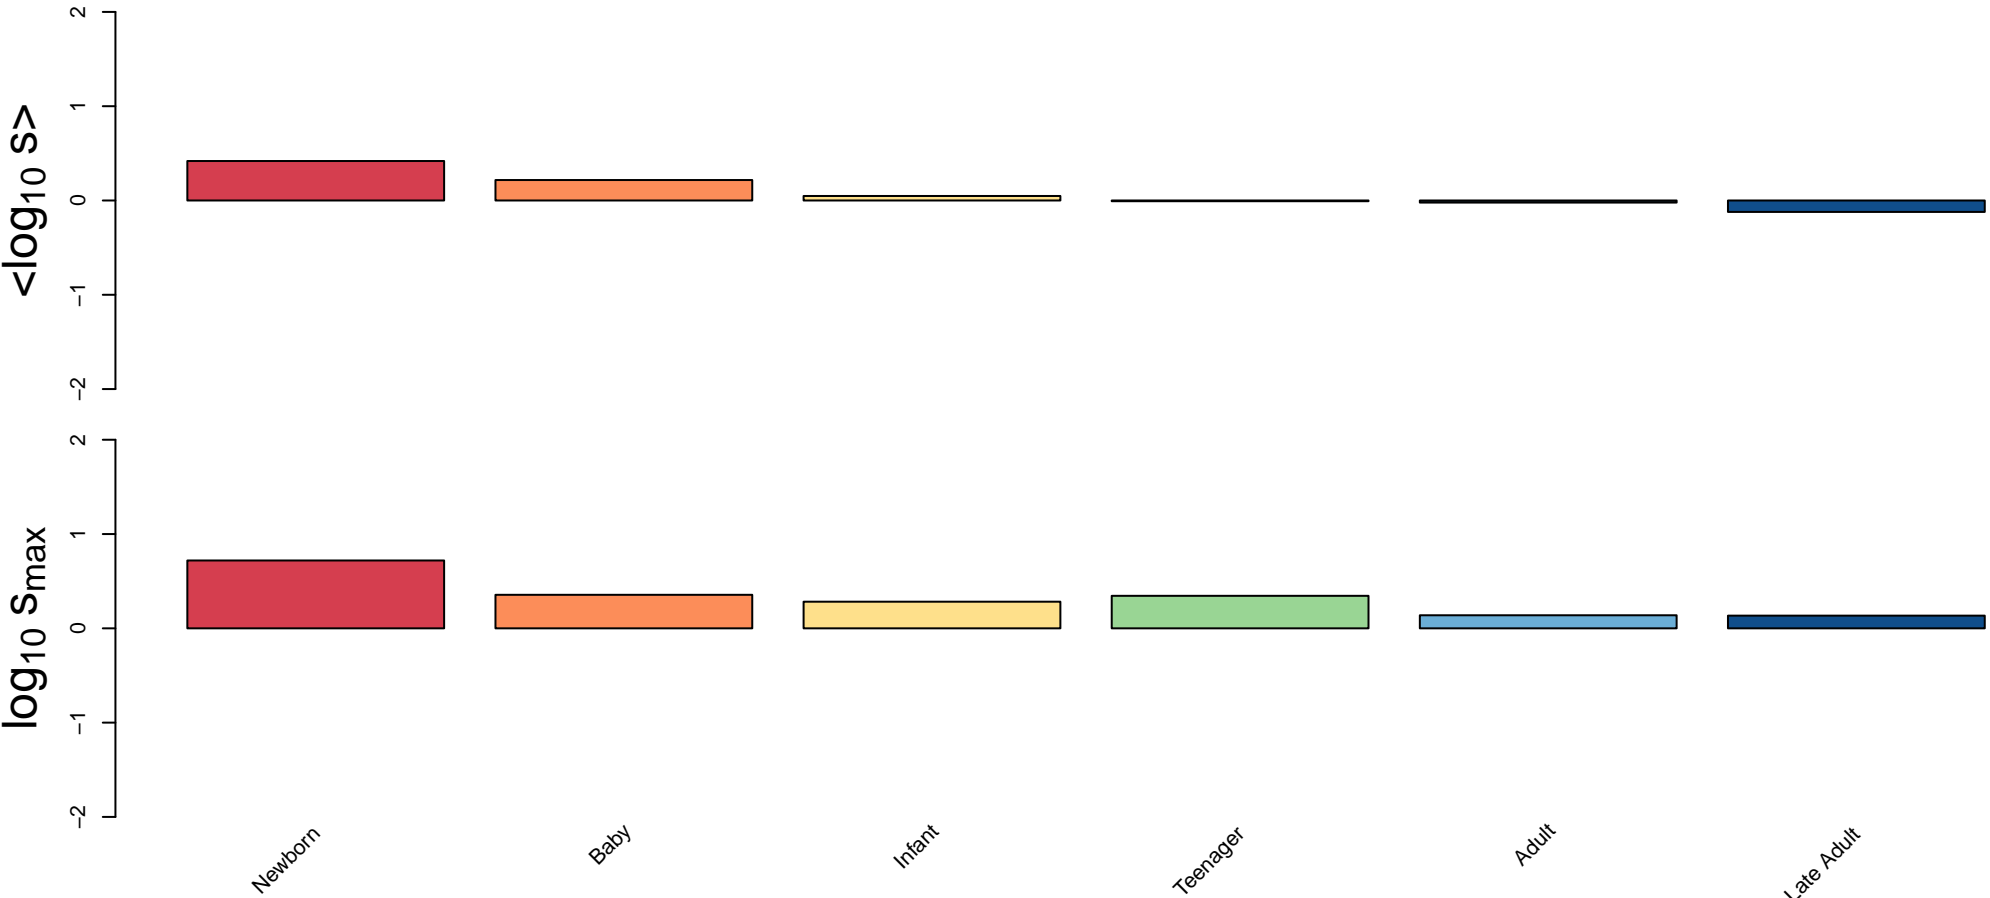

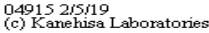

Estrogen\_signaling\_pathway  
sink nodes

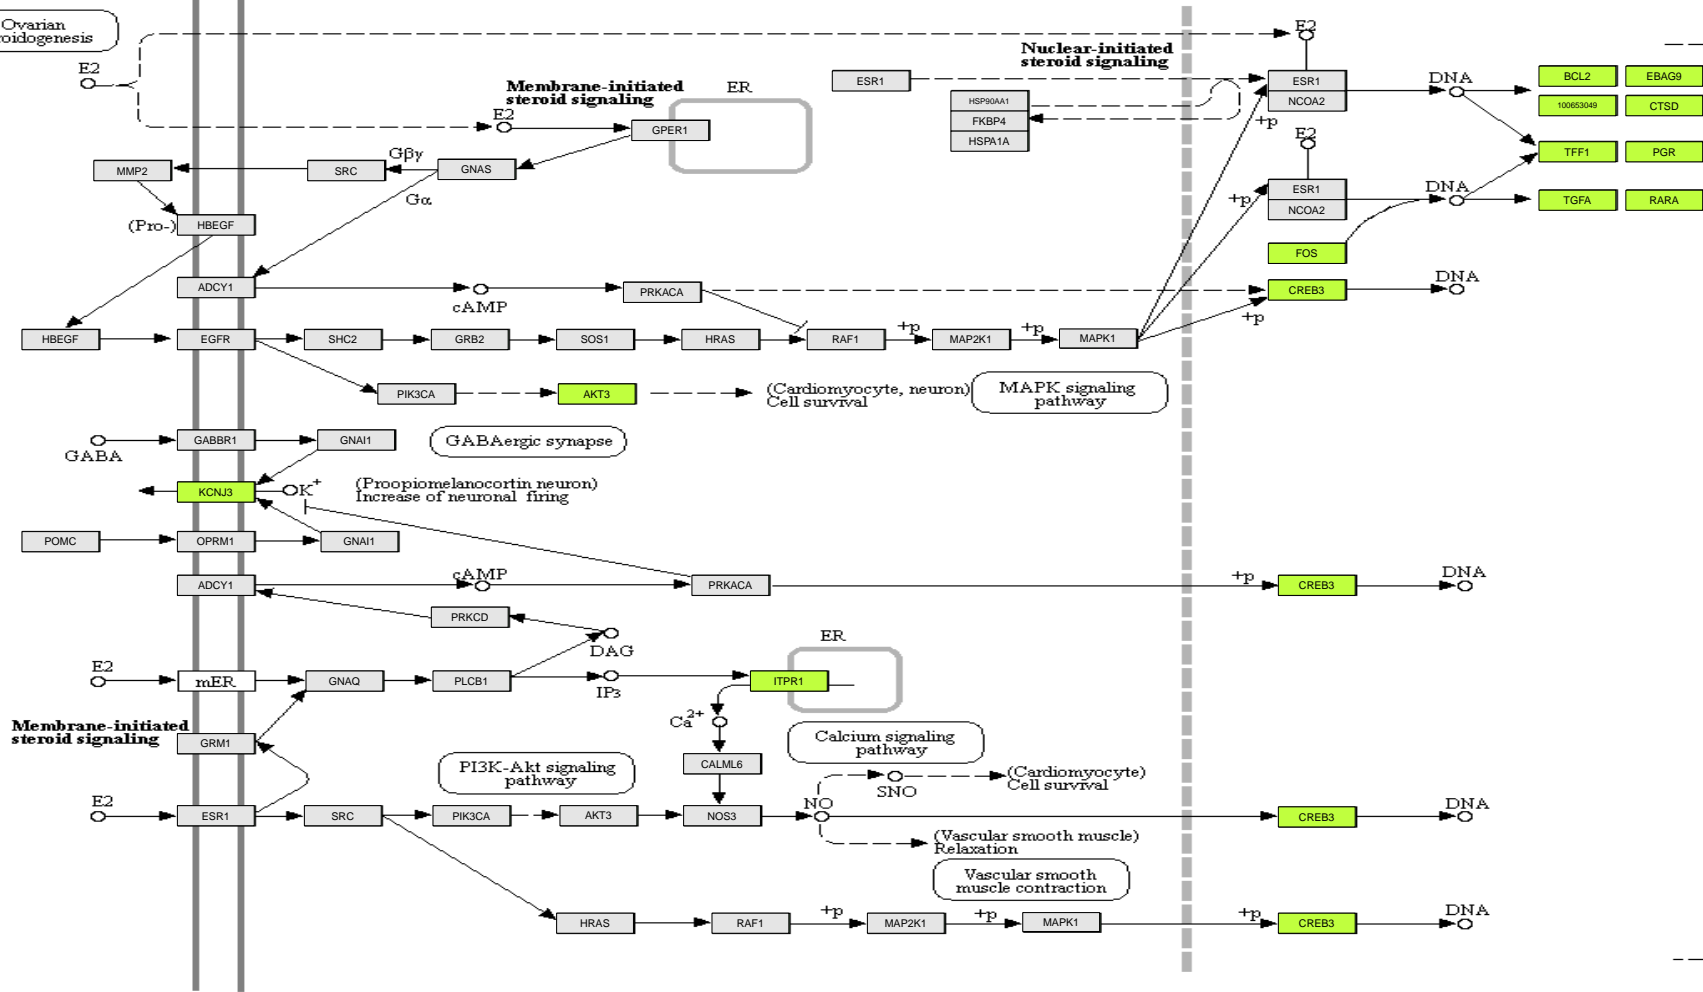





Estrogen\_signaling\_pathway  
Infant

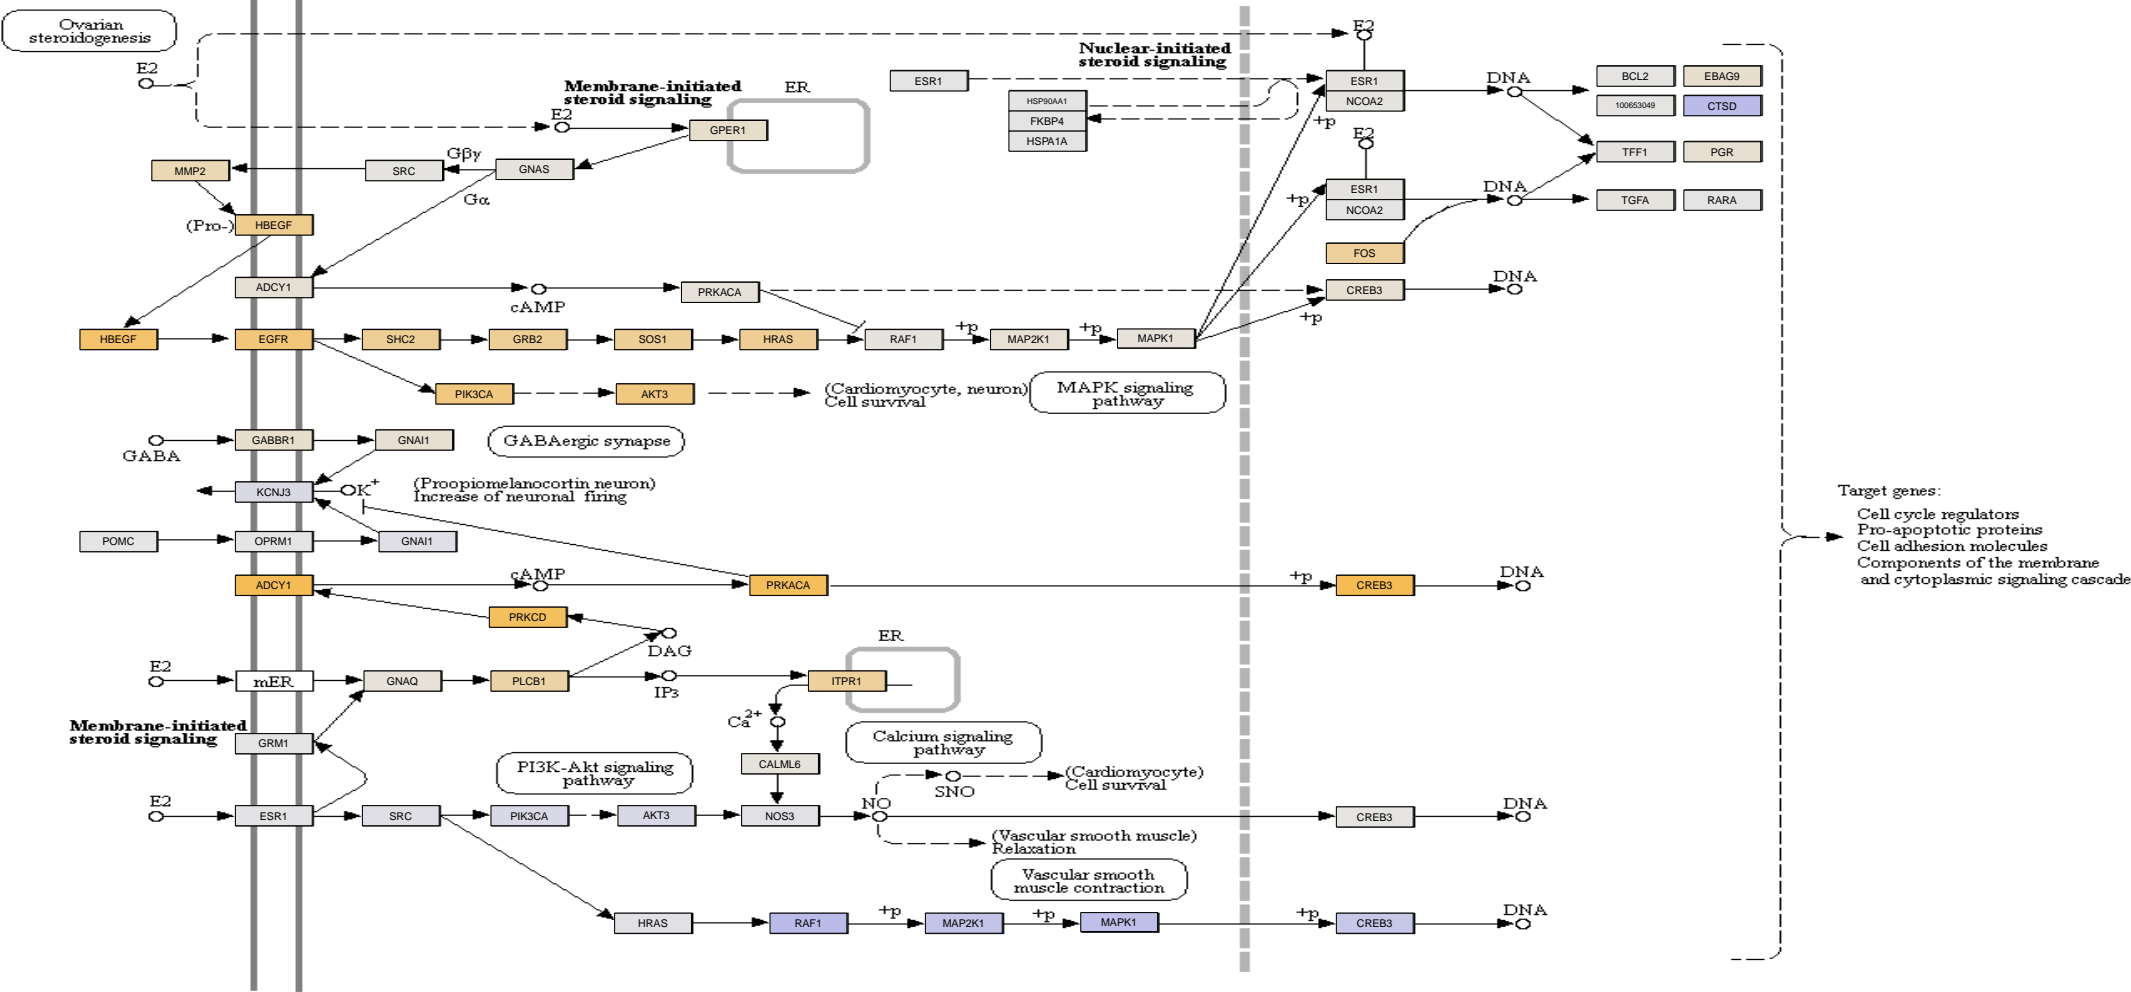

Estrogen signaling pathway  
Teenager

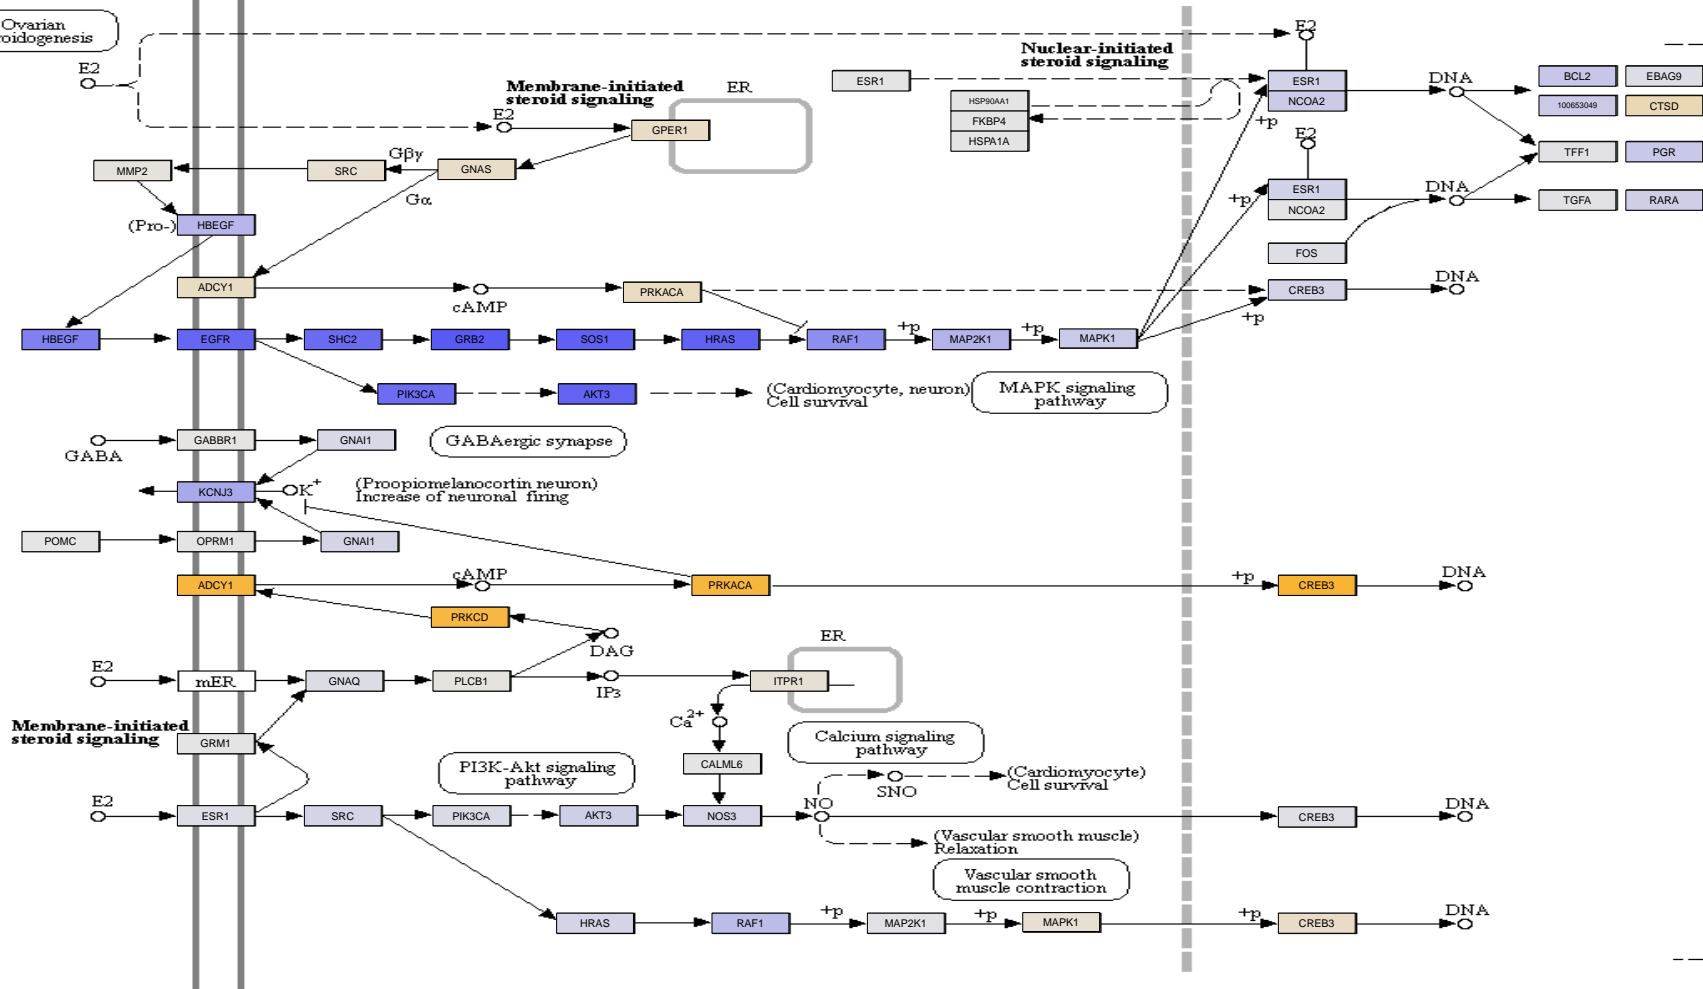

Target genes:  
Cell cycle regulators  
Pro-apoptotic proteins  
Cell adhesion molecules  
Components of the membrane  
and cytoplasmic signaling cascade

Estrogen\_signaling\_pathway  
Adult

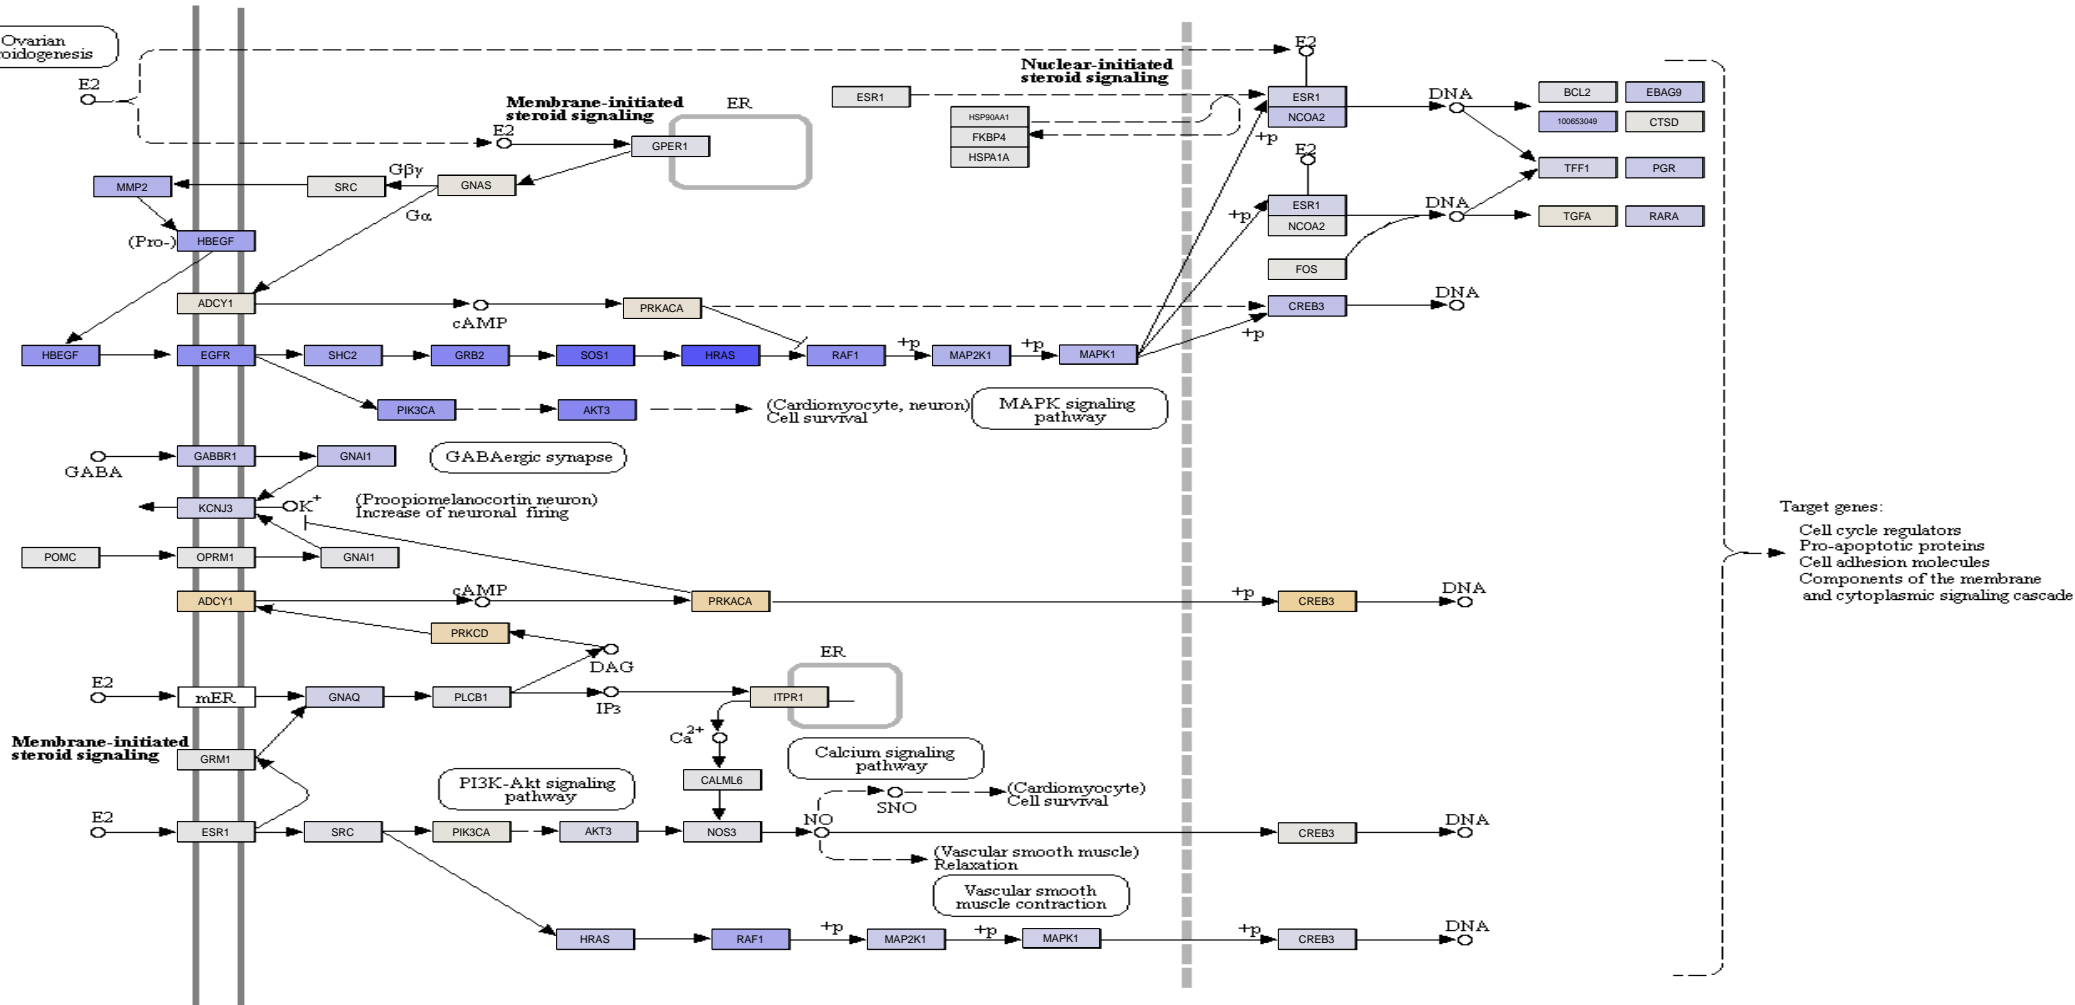



Estrogen signaling pathway  
Late Adult

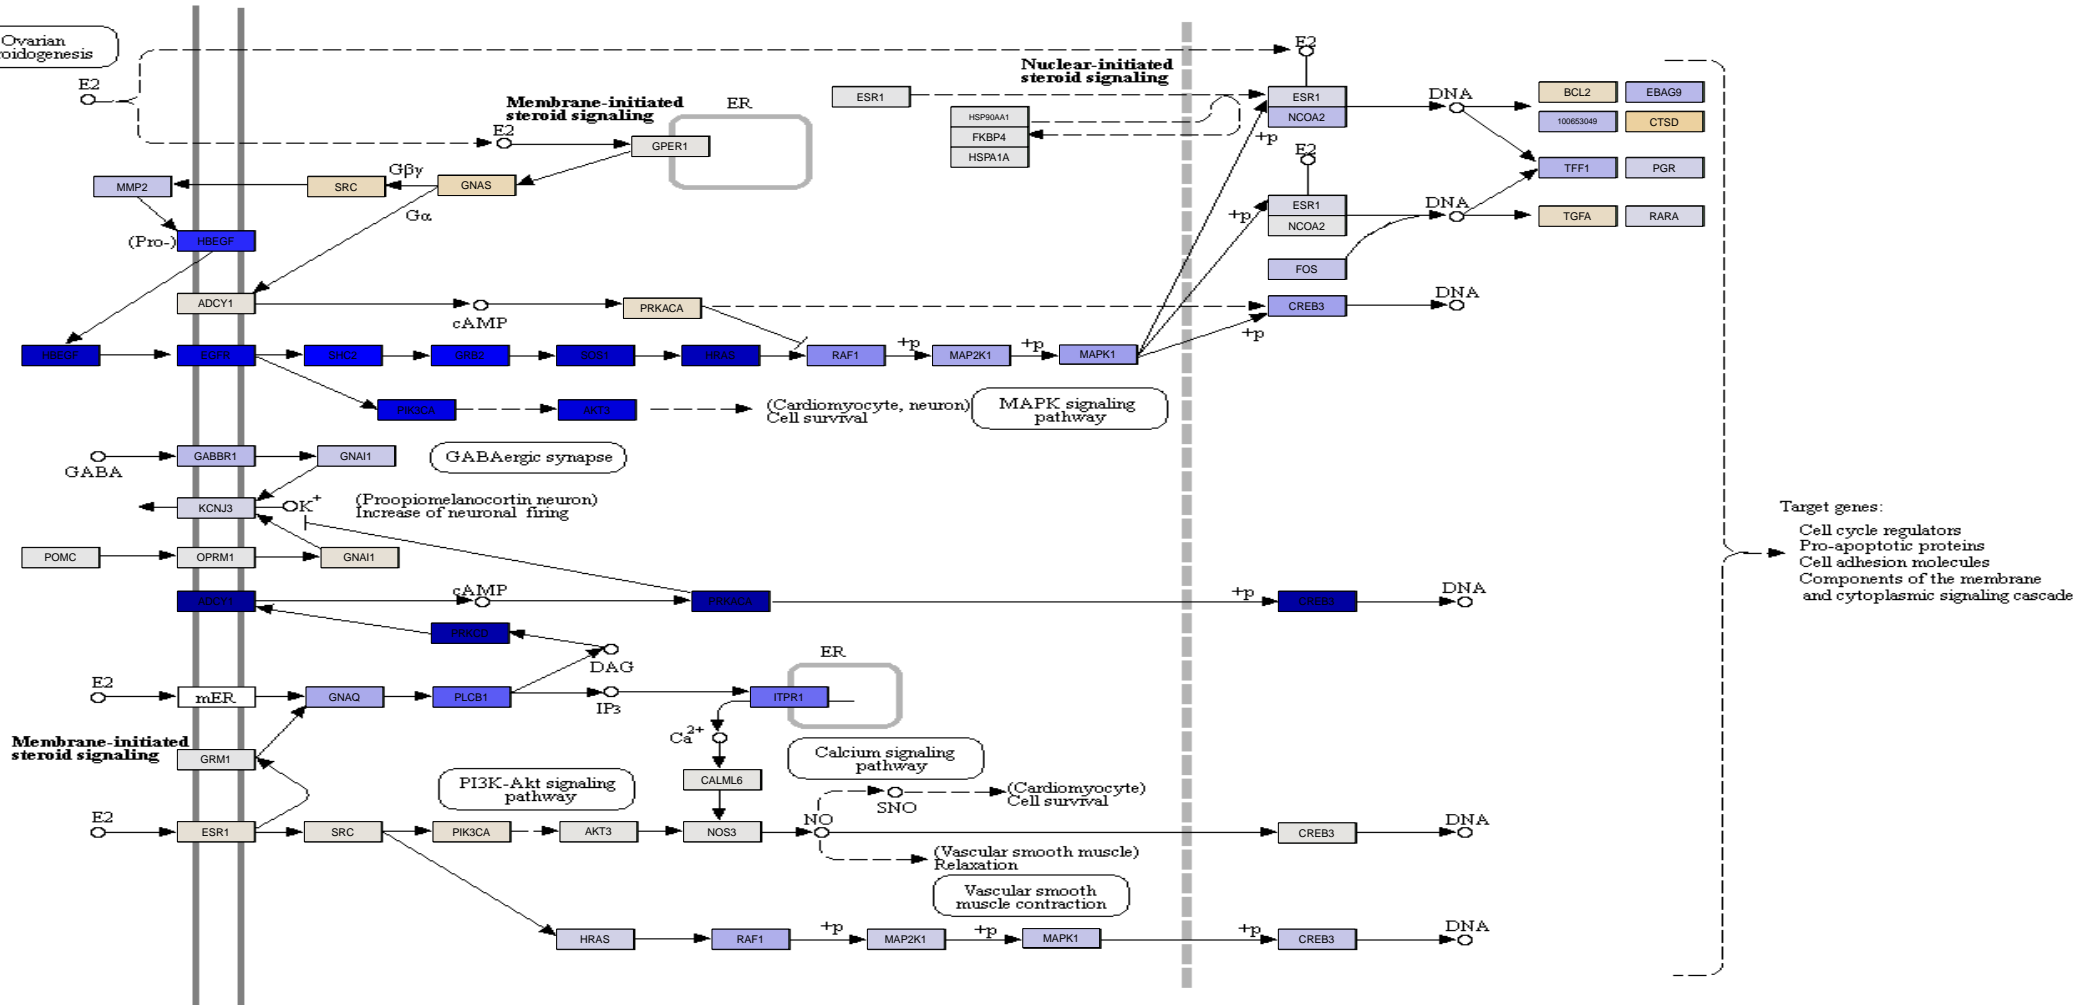

Supplement: s1 [file s1]
