# Supplementary material for: The Transcriptome and Methylome of the Developing and Aging Brain and Their Relations to Gliomas and Psychological Disorders
Source: MDPI journal article supplement (doi:10.3390/cells11030362), 2022-01-21

Neurotrophin signaling pathway

all genes

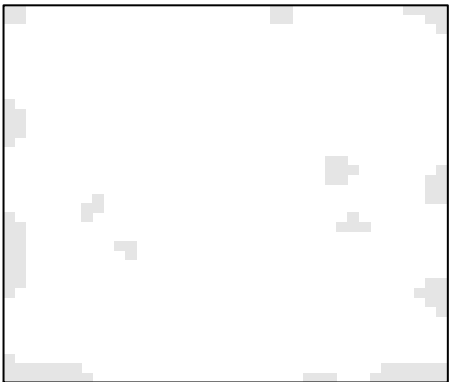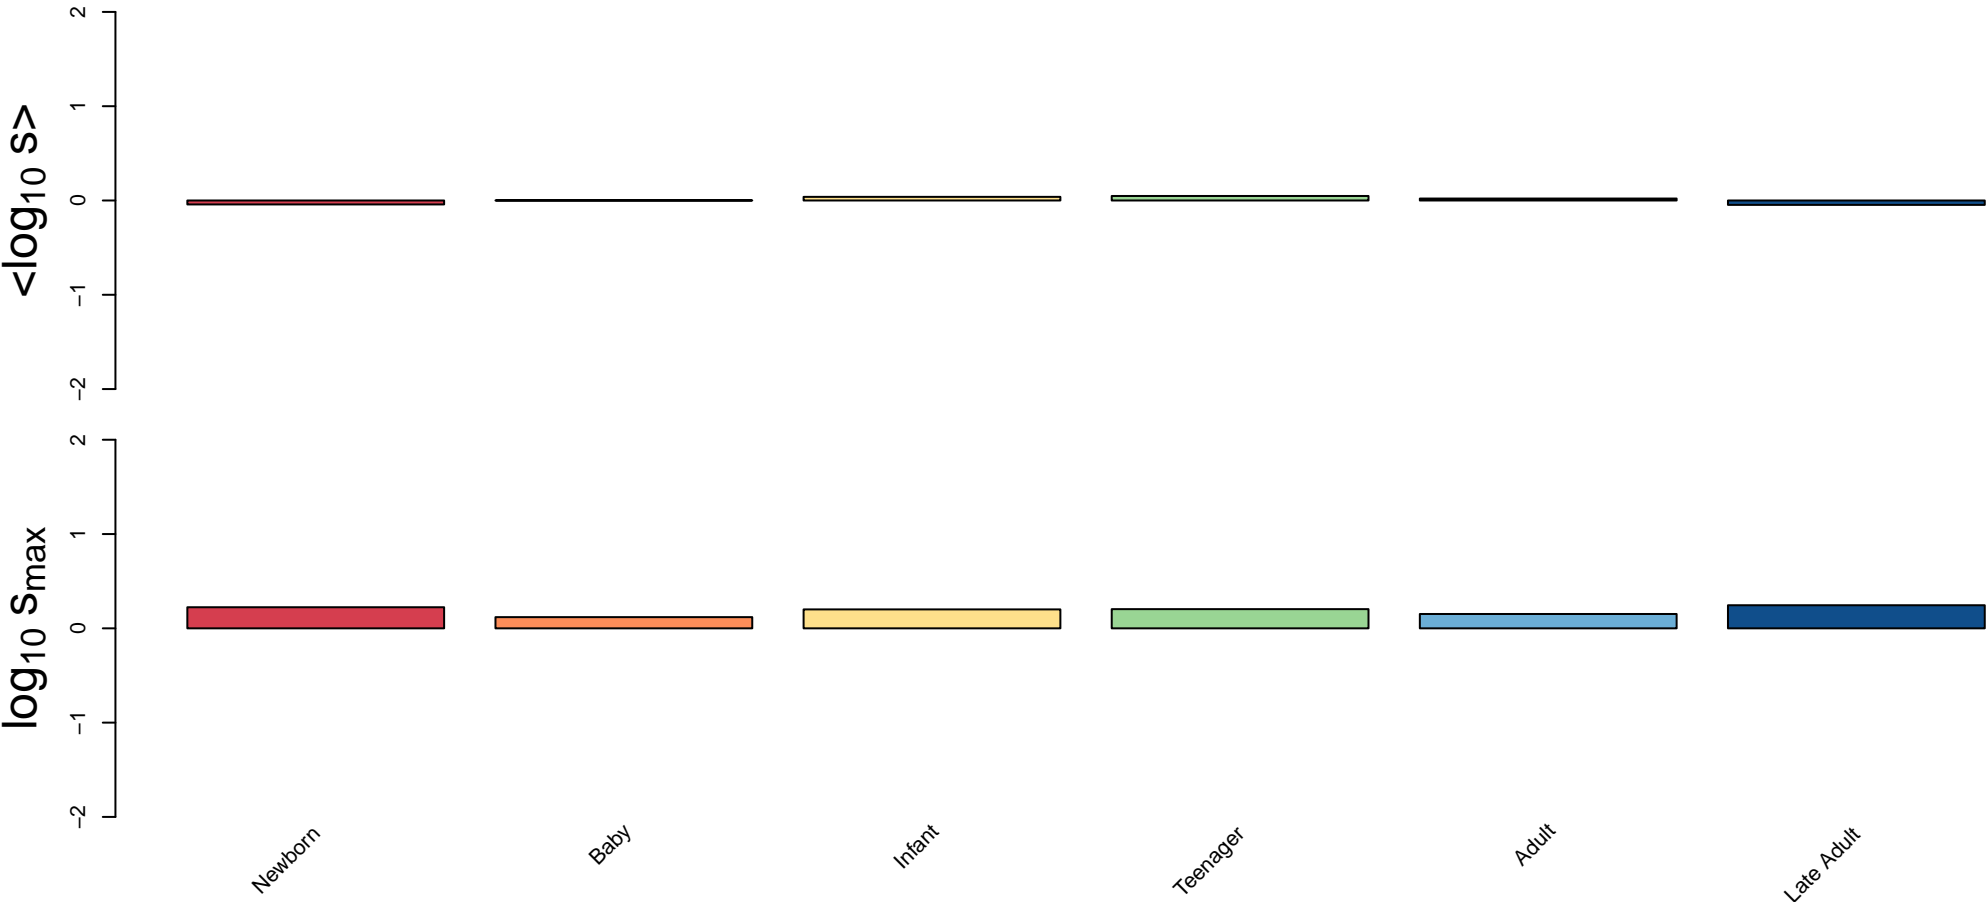

Neurotrophin signaling pathway  
genes with data

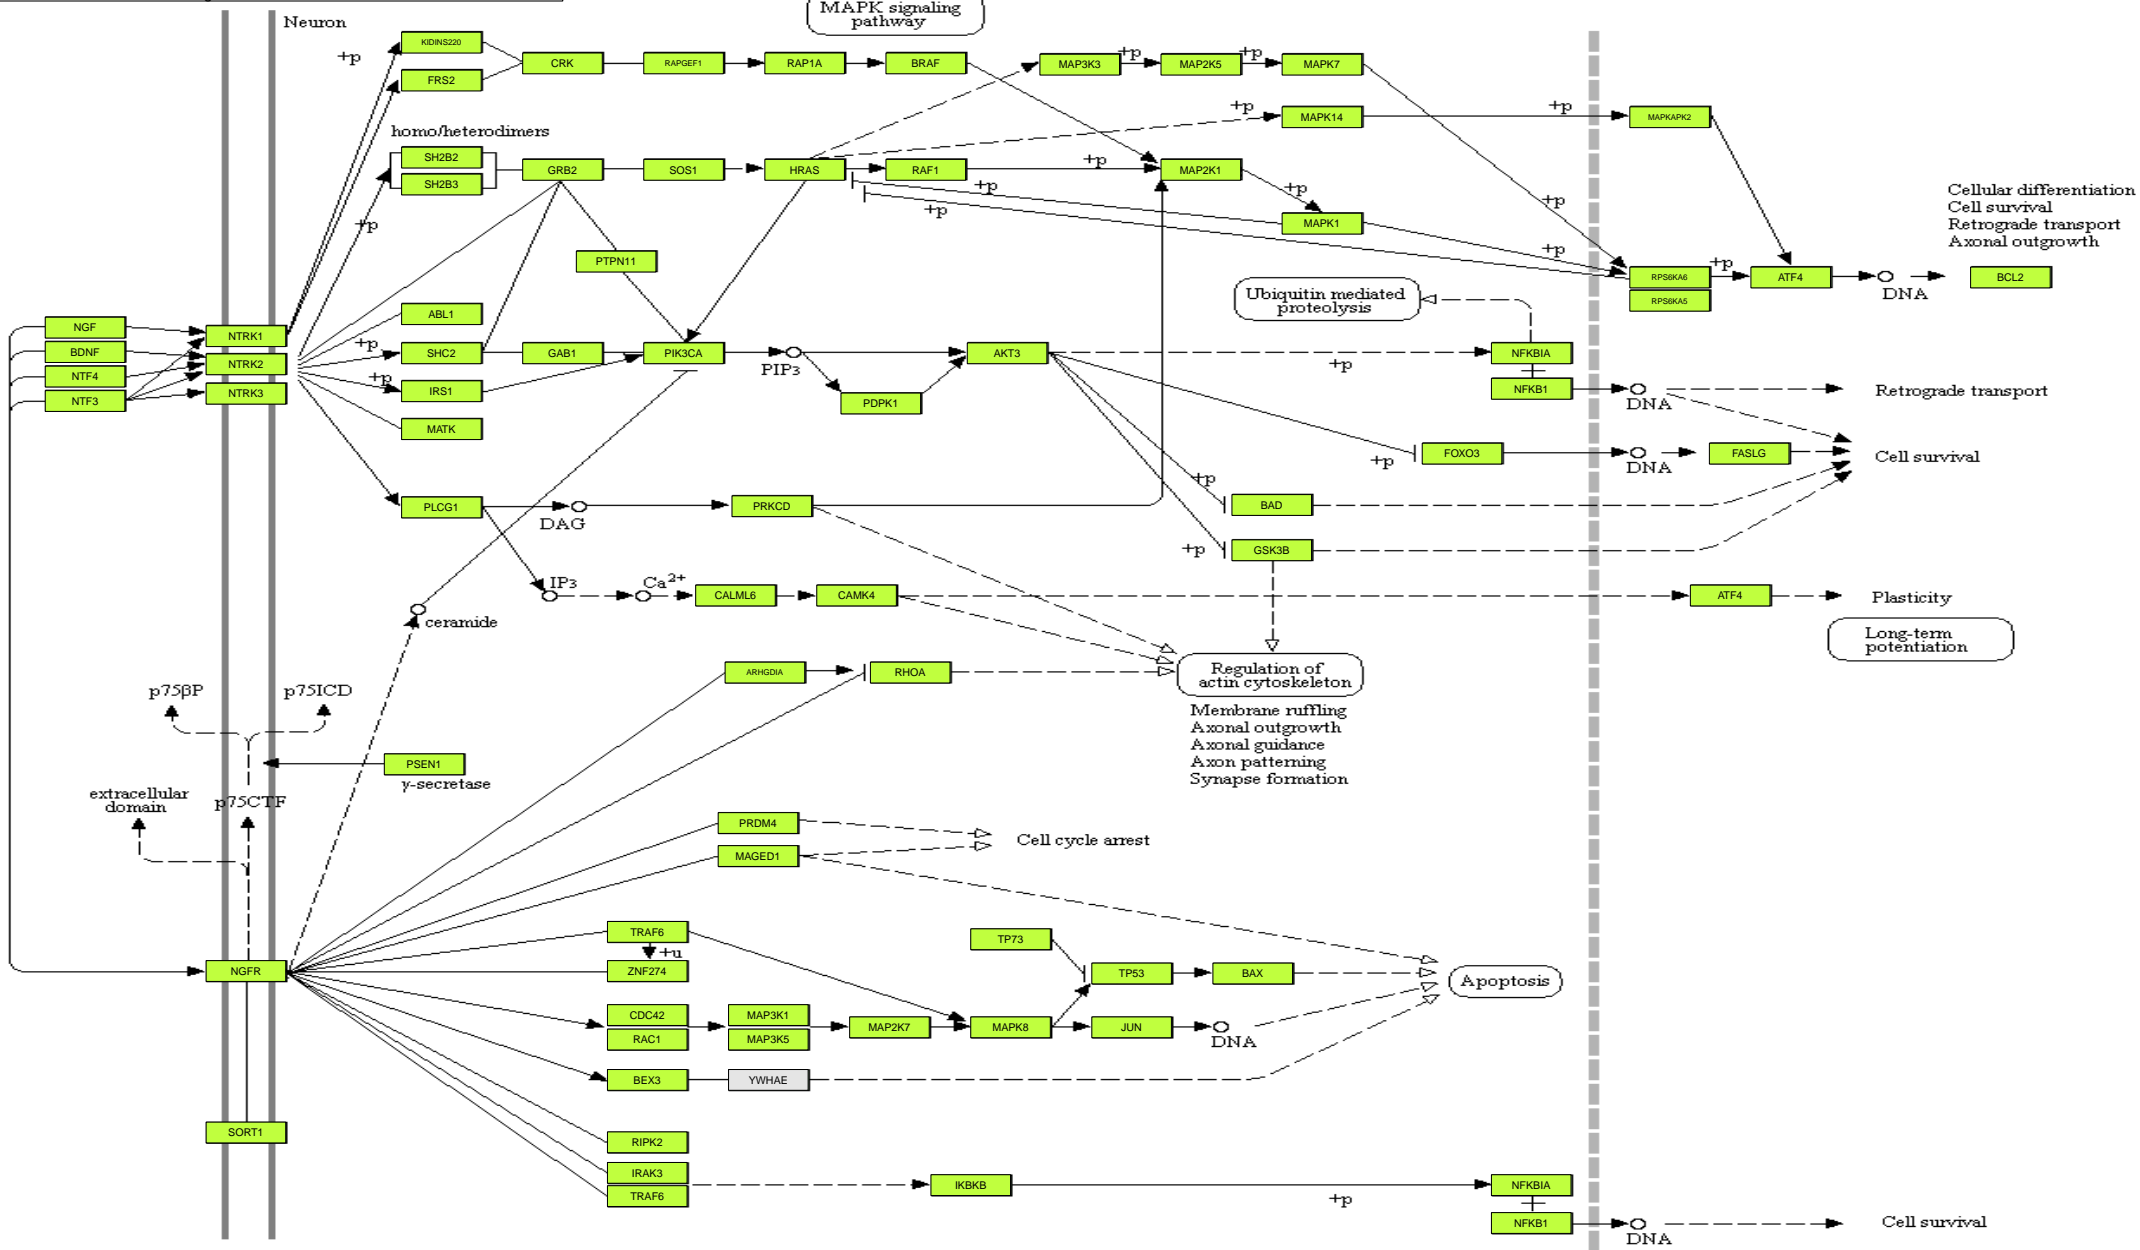

Neurotrophin signaling pathway  
sink nodes

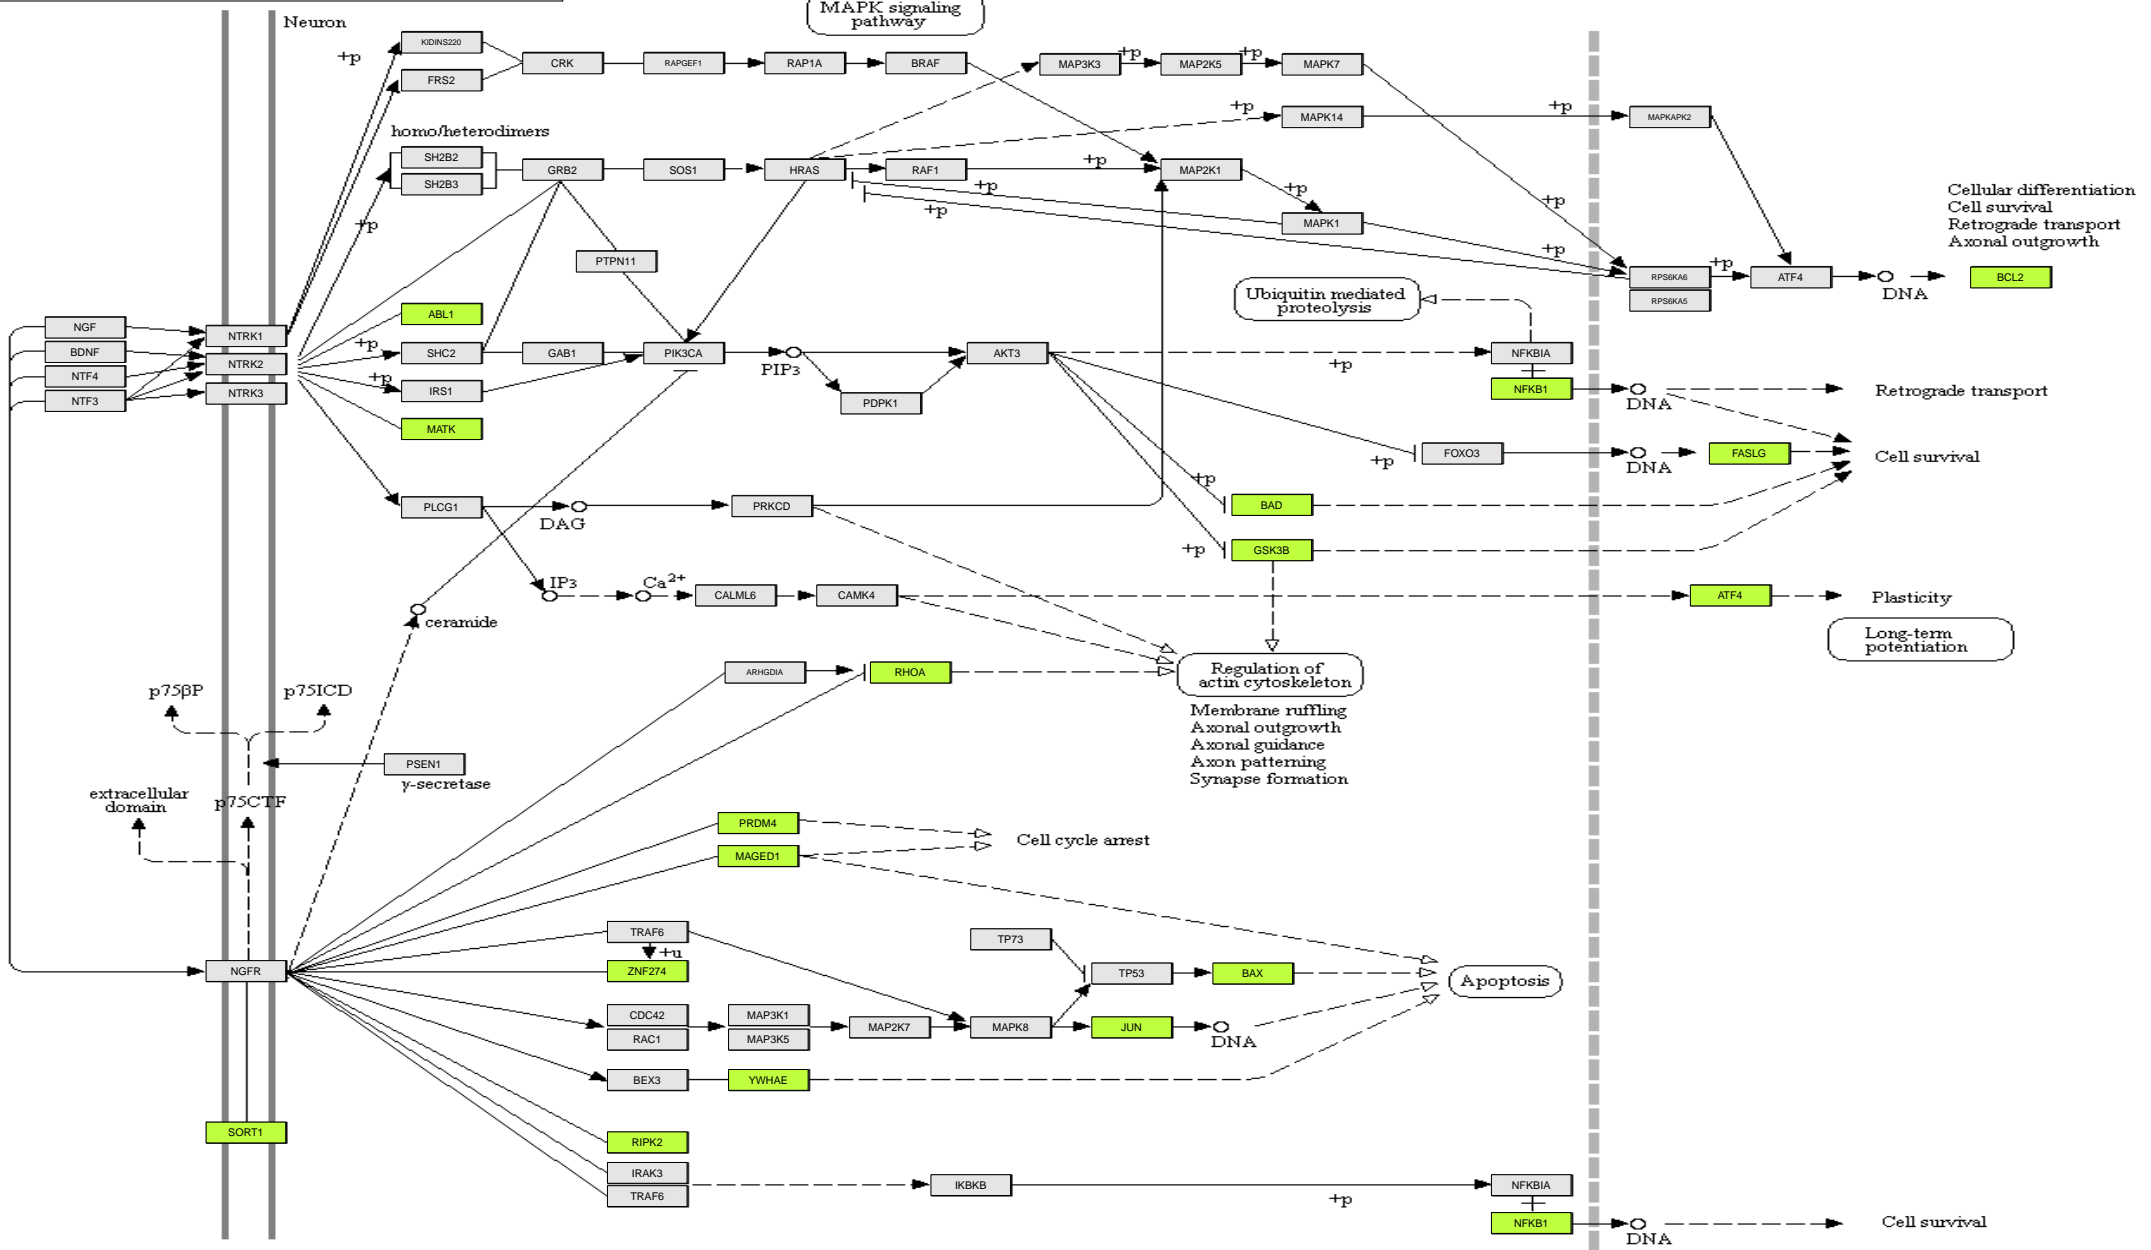

Neurotrophin signaling pathway  
Newborn

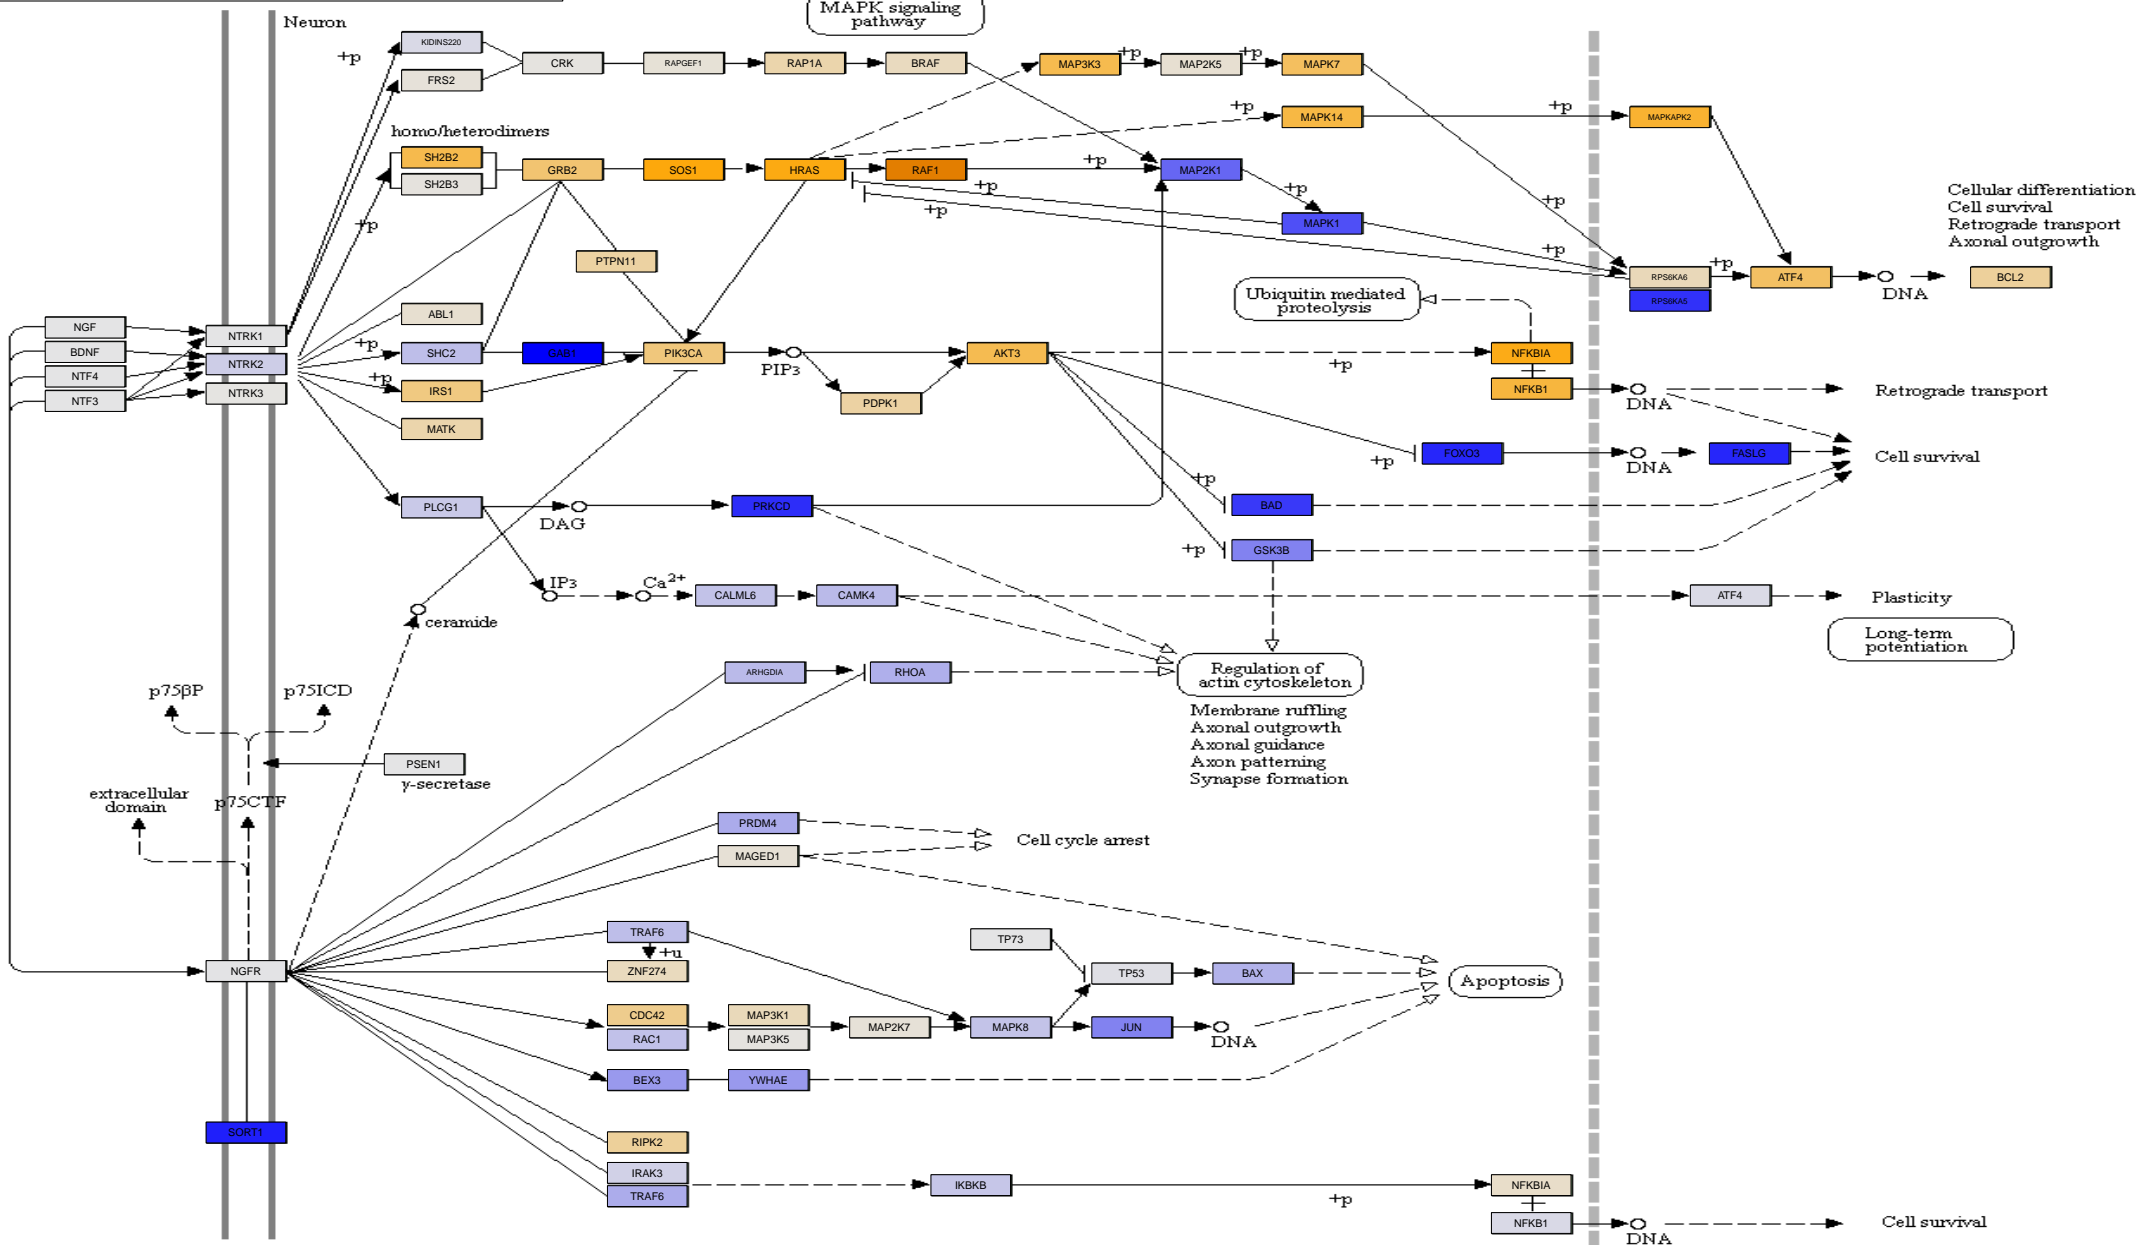

# Neurotrophin signaling pathway

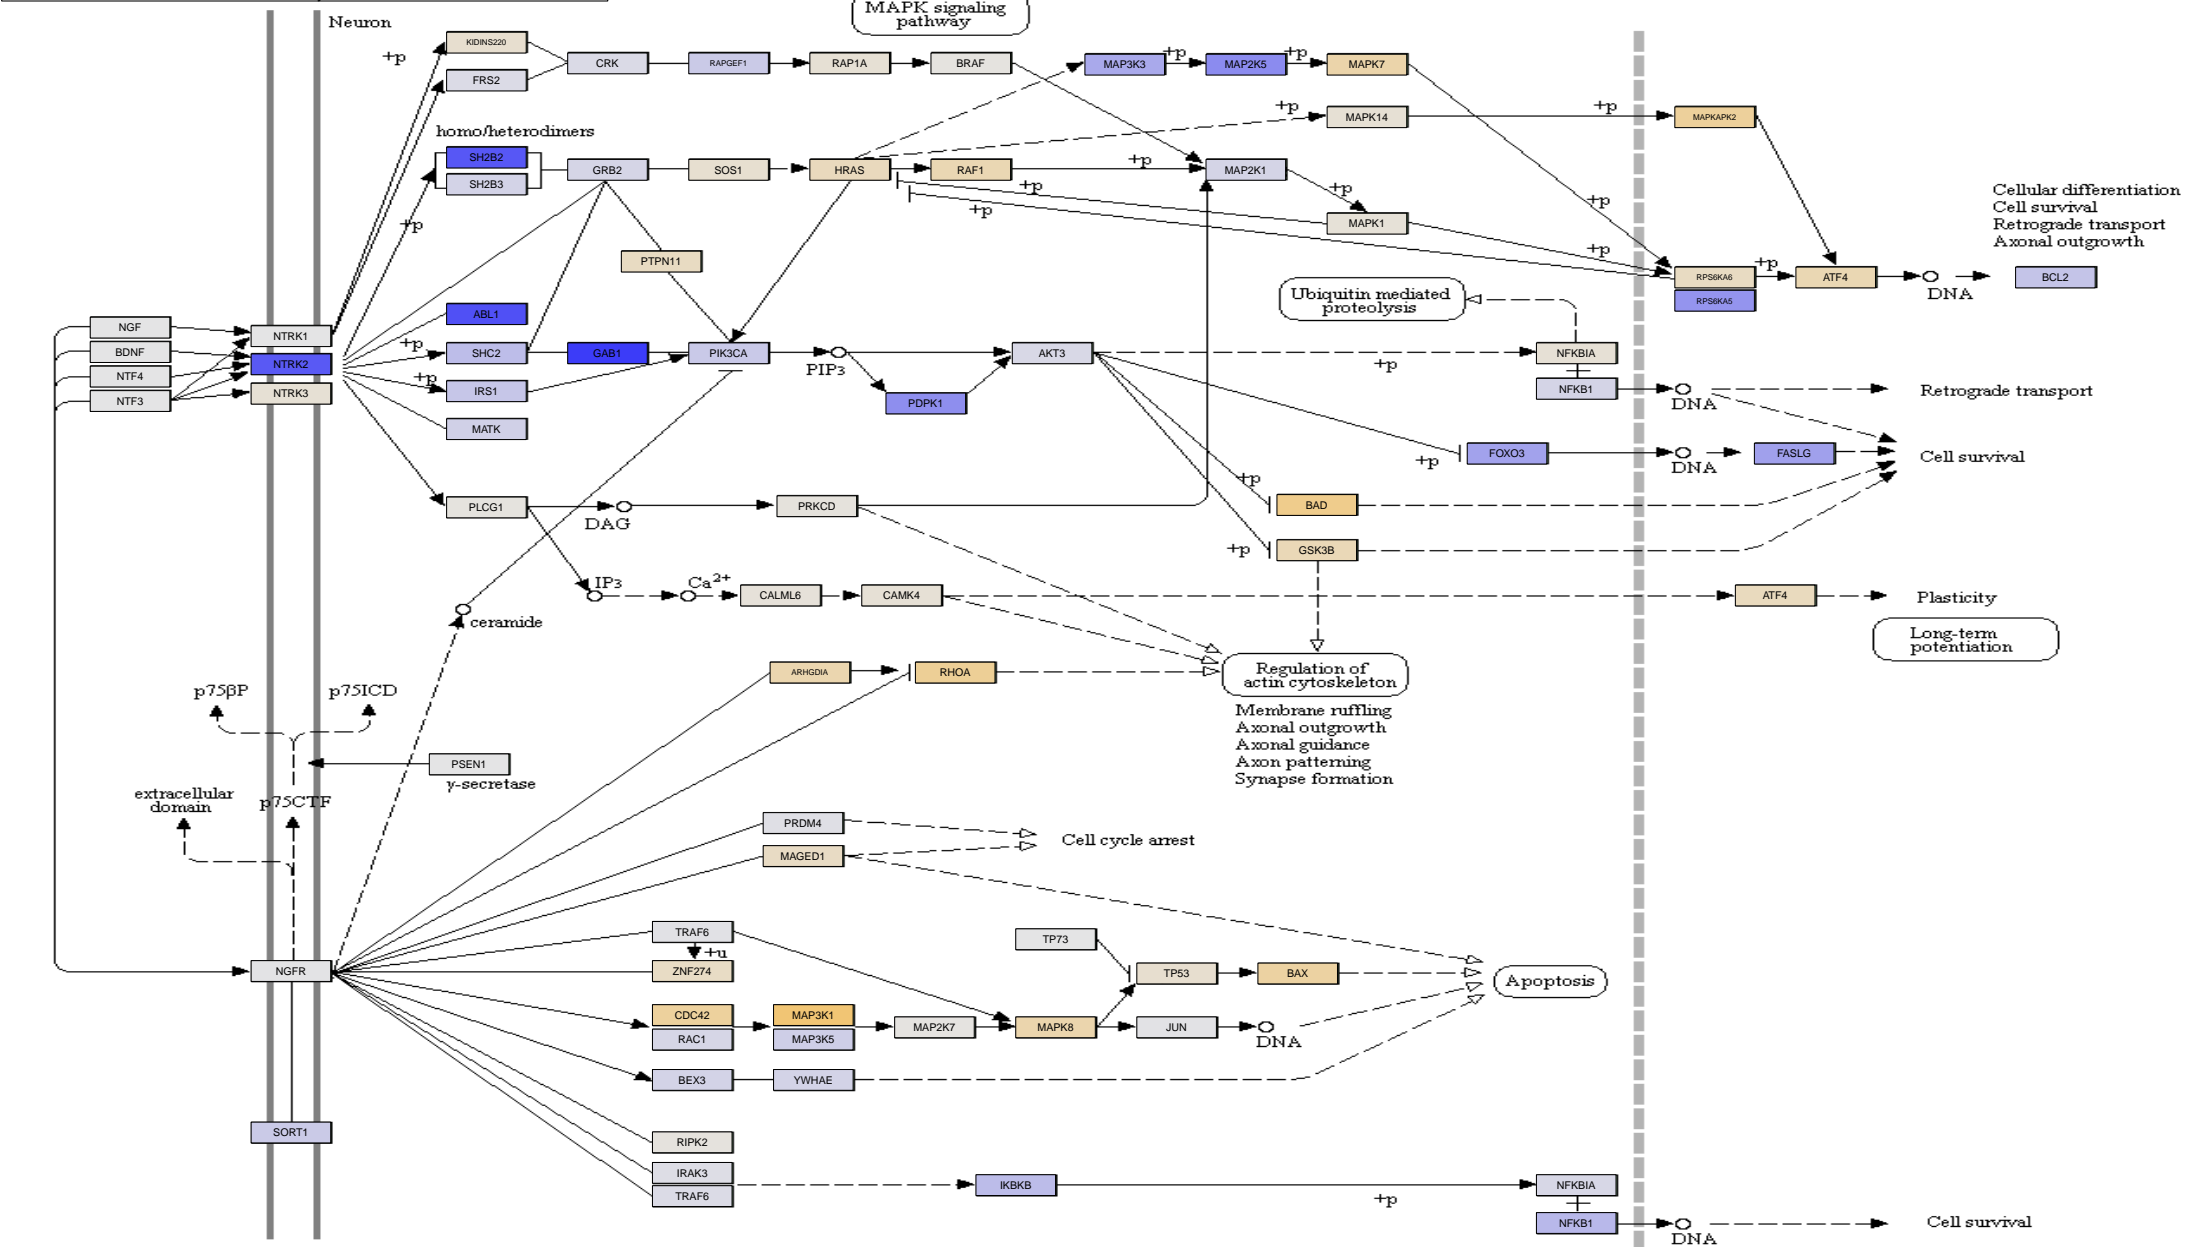

Neurotrophin signaling pathway  
Infant

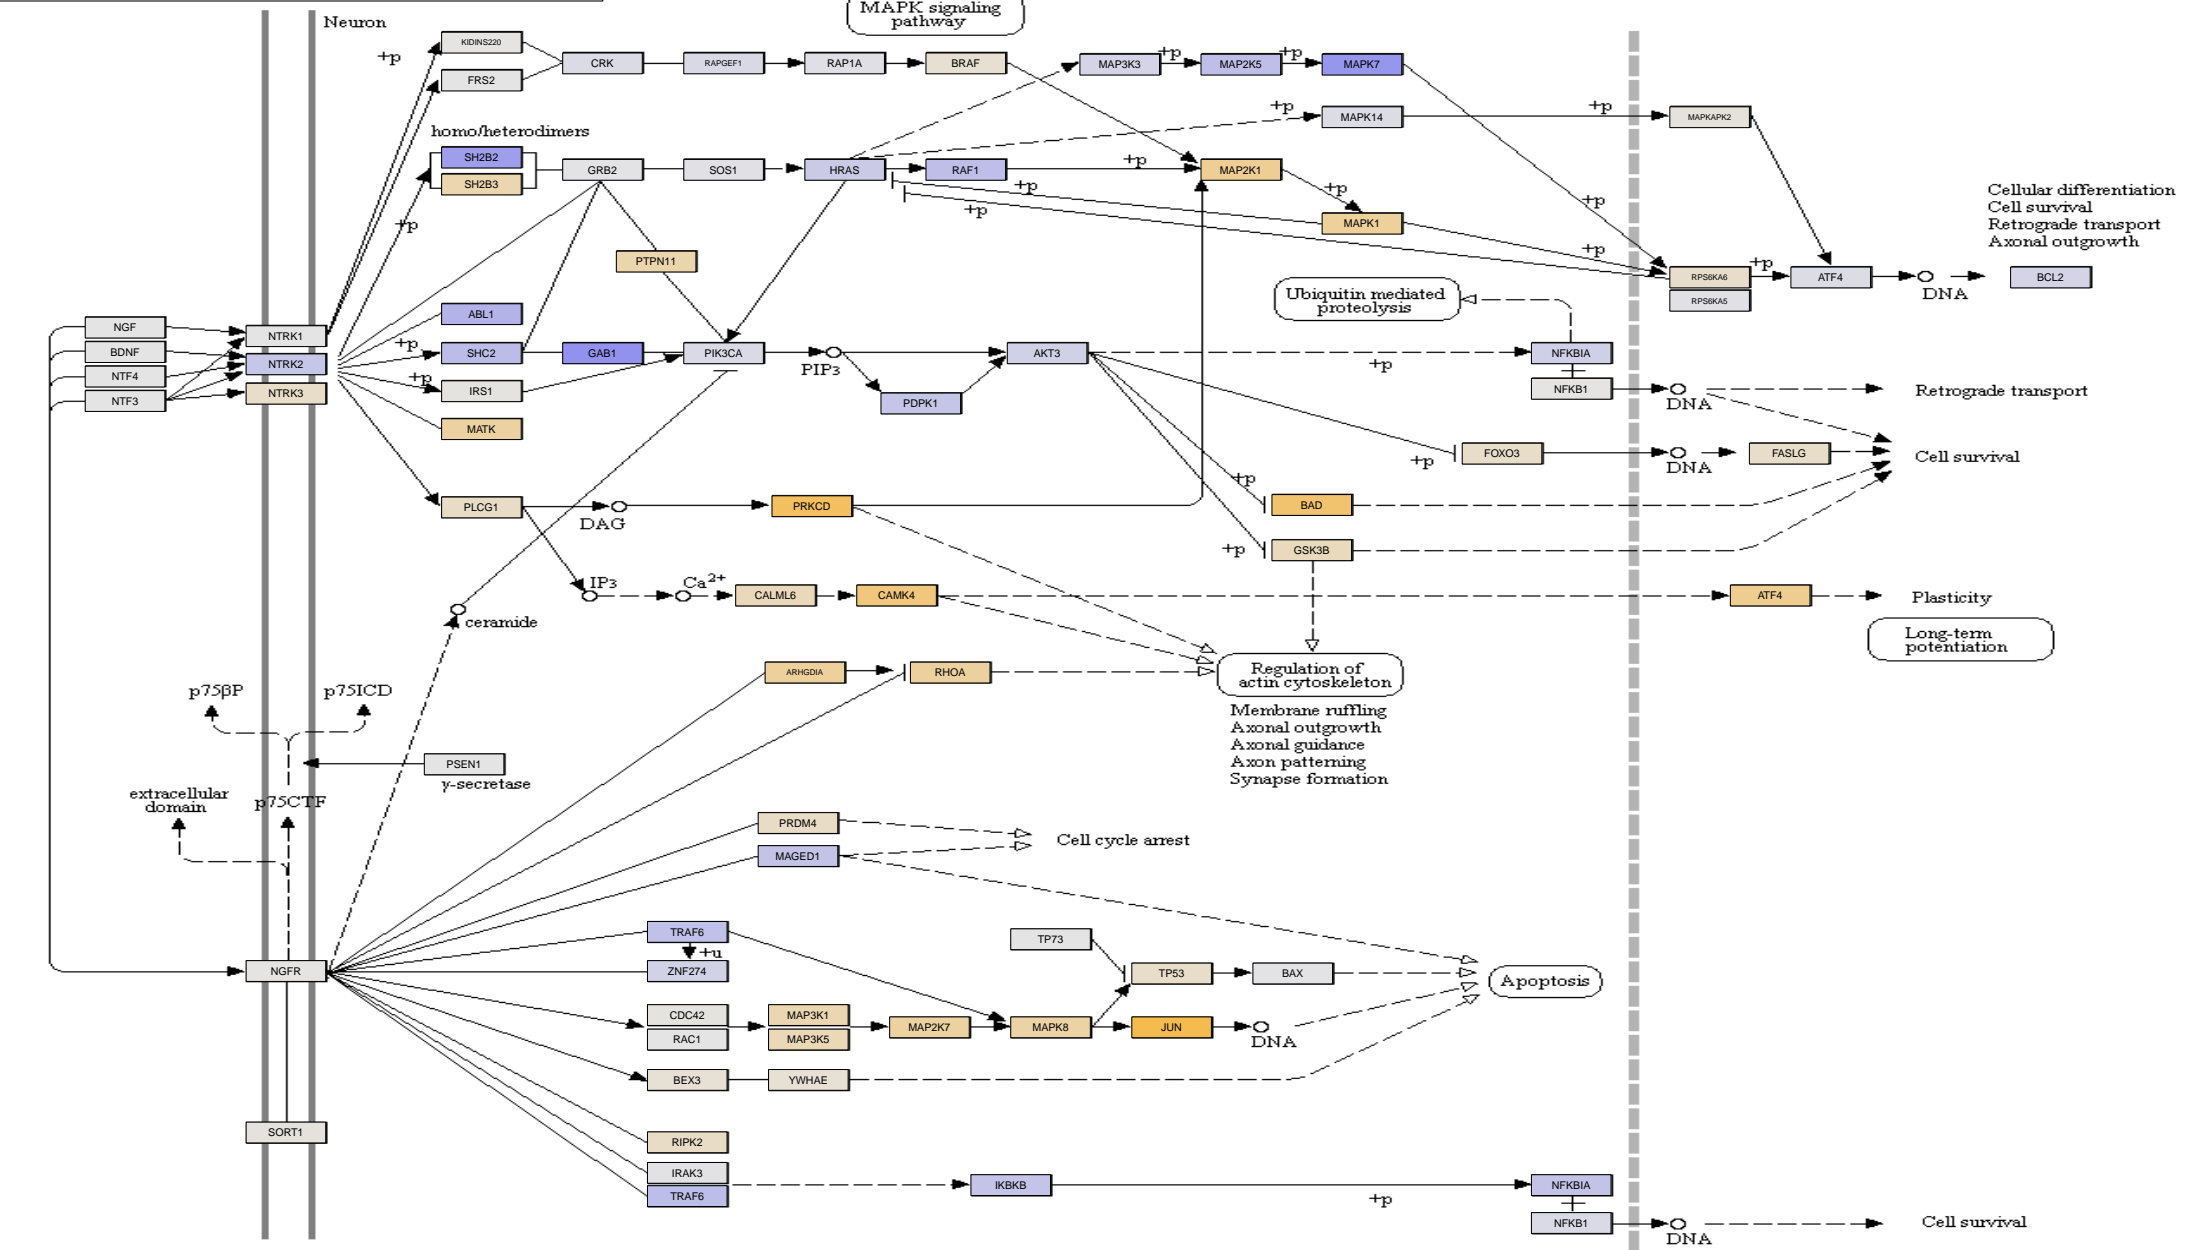







Neurotrophin signaling pathway  
Late Adult

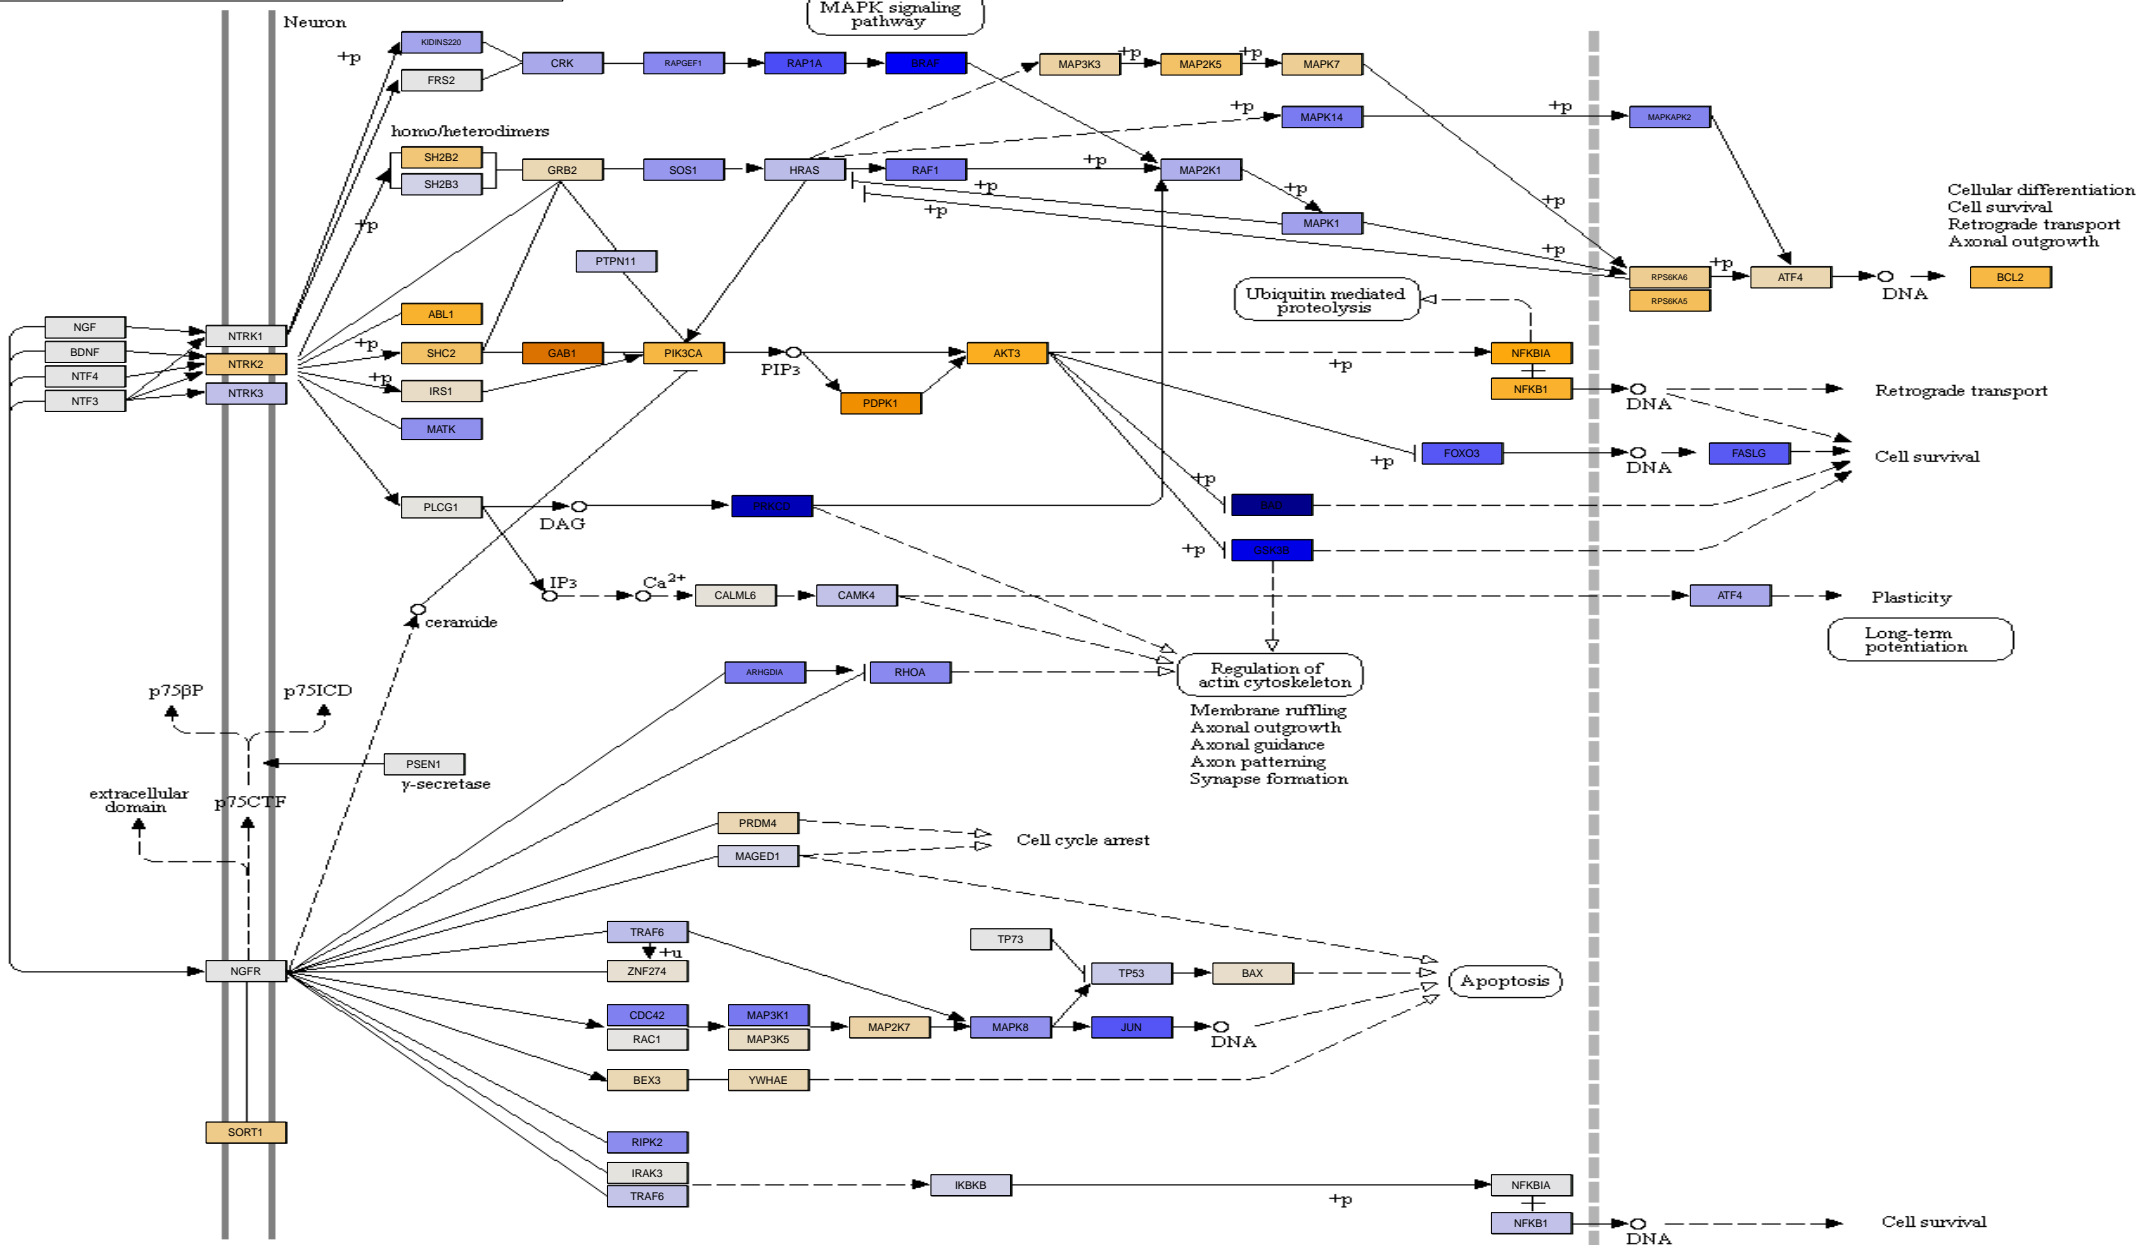

Supplement: s1 [file s1]
