# Supplementary material for: The Transcriptome and Methylome of the Developing and Aging Brain and Their Relations to Gliomas and Psychological Disorders
Source: MDPI journal article supplement (doi:10.3390/cells11030362), 2022-01-21

NF-kappa B signaling pathway

all genes

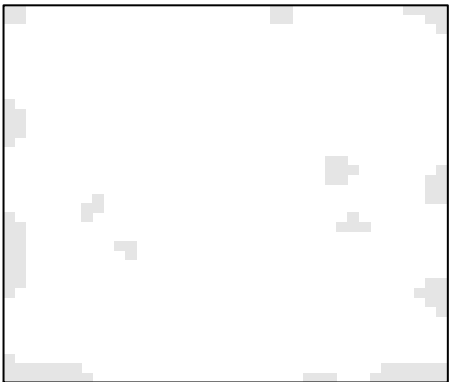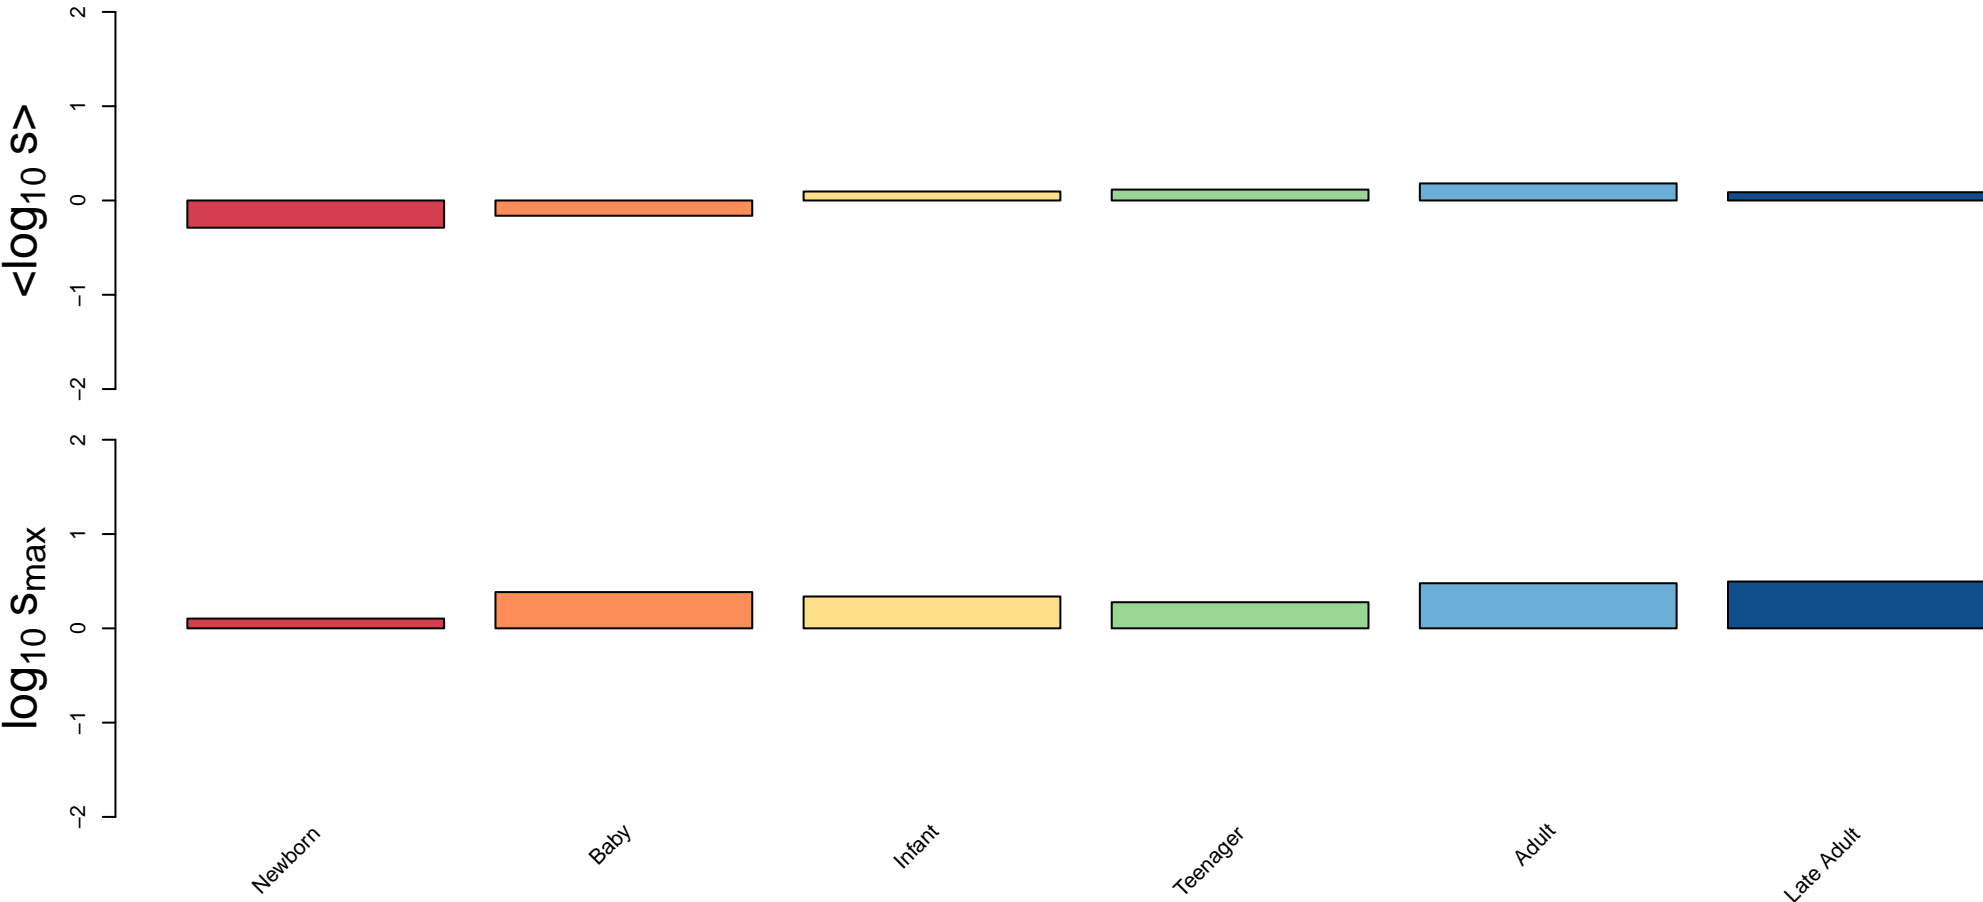





|                              |
|------------------------------|
| NF_kappa_B_signaling_pathway |
| Newborn                      |

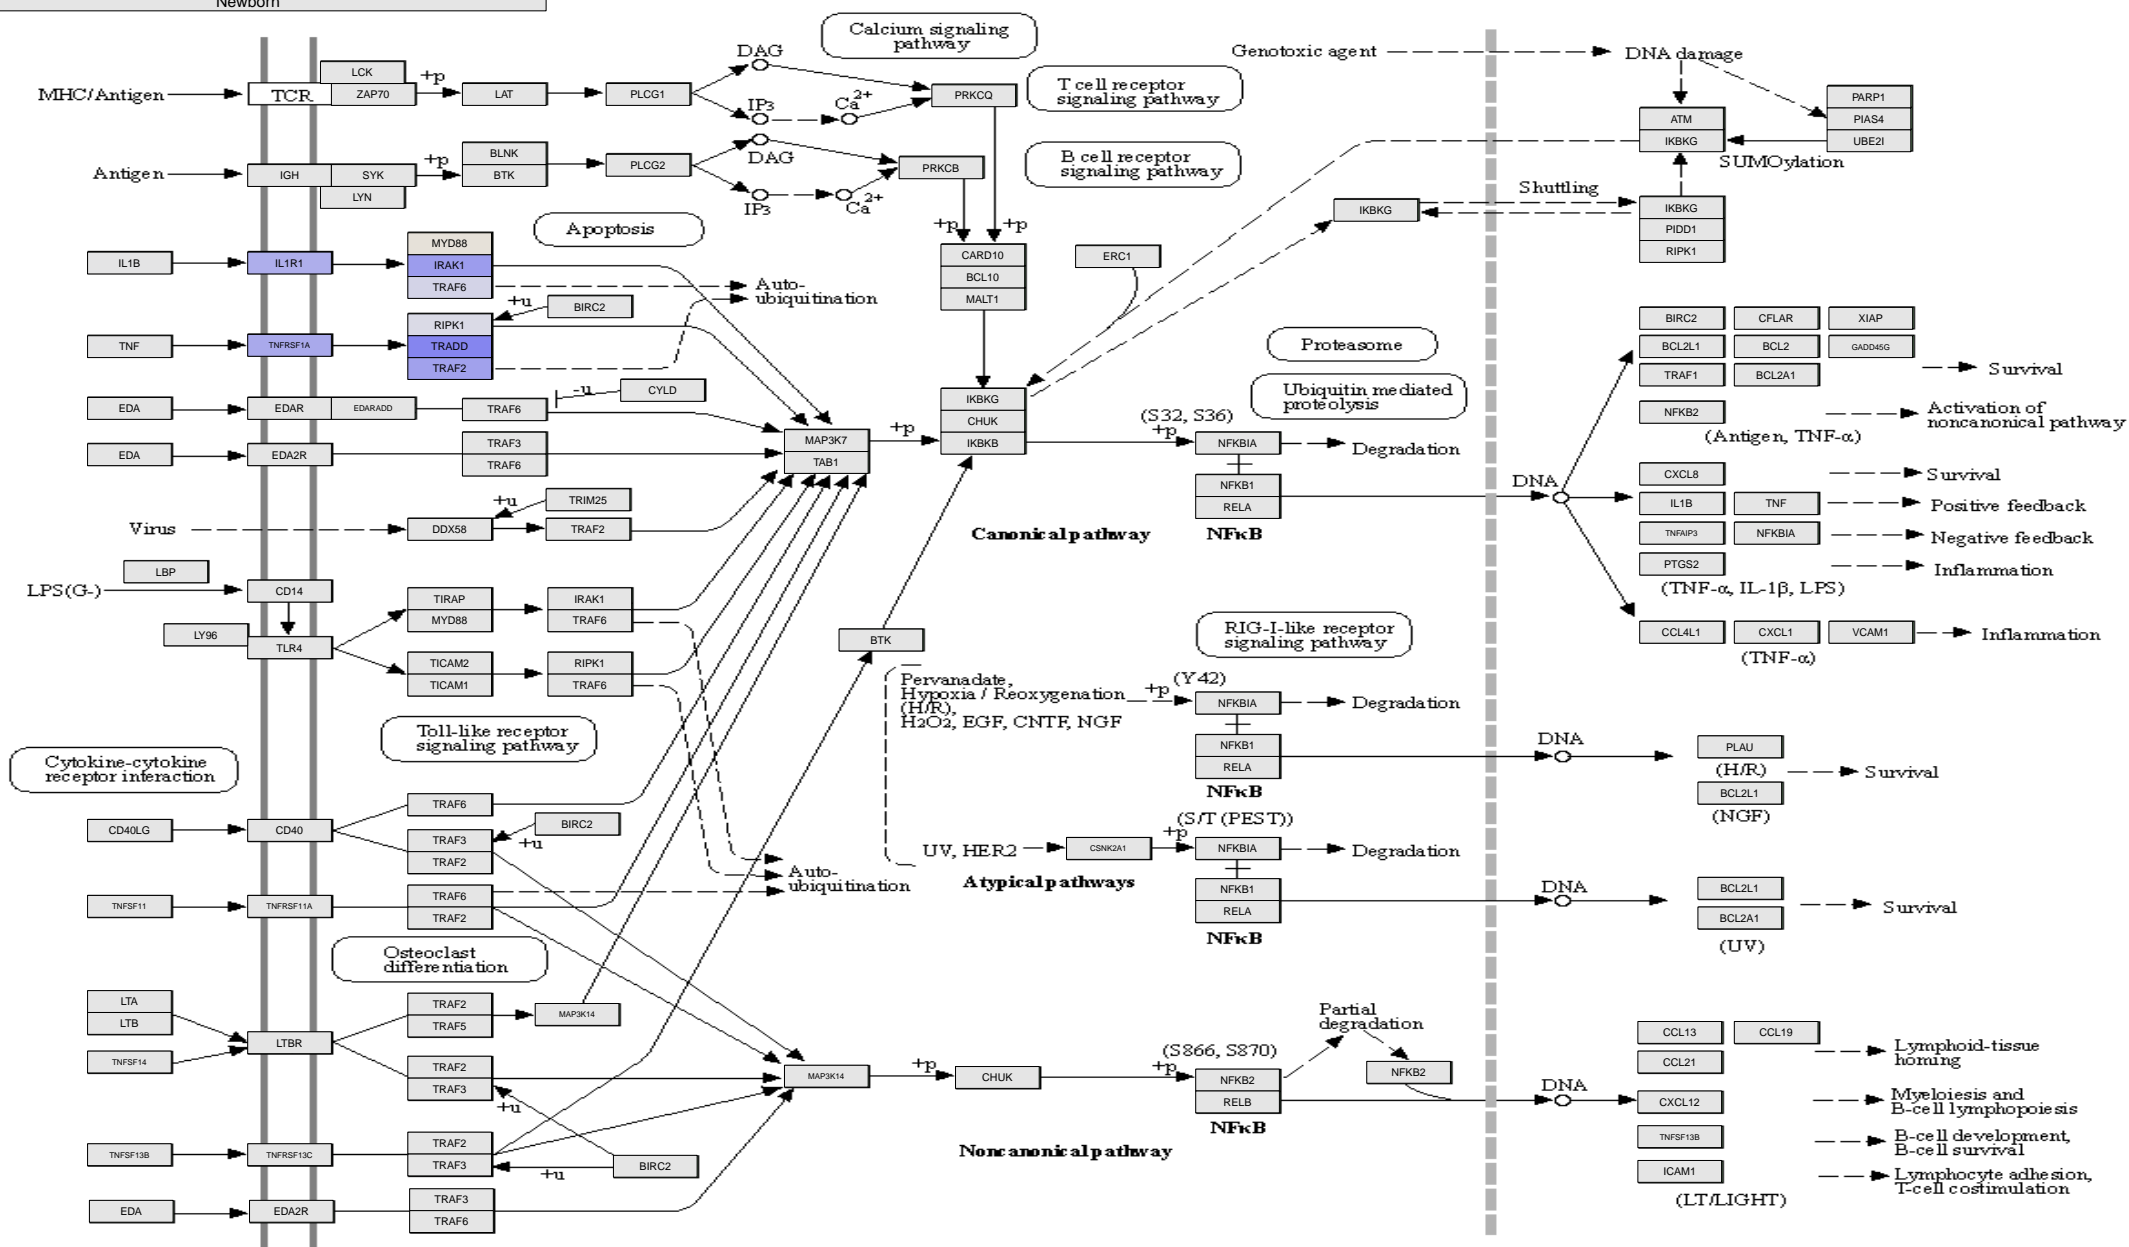

|                              |
|------------------------------|
| NF_kappa_B_signaling_pathway |
| Baby                         |

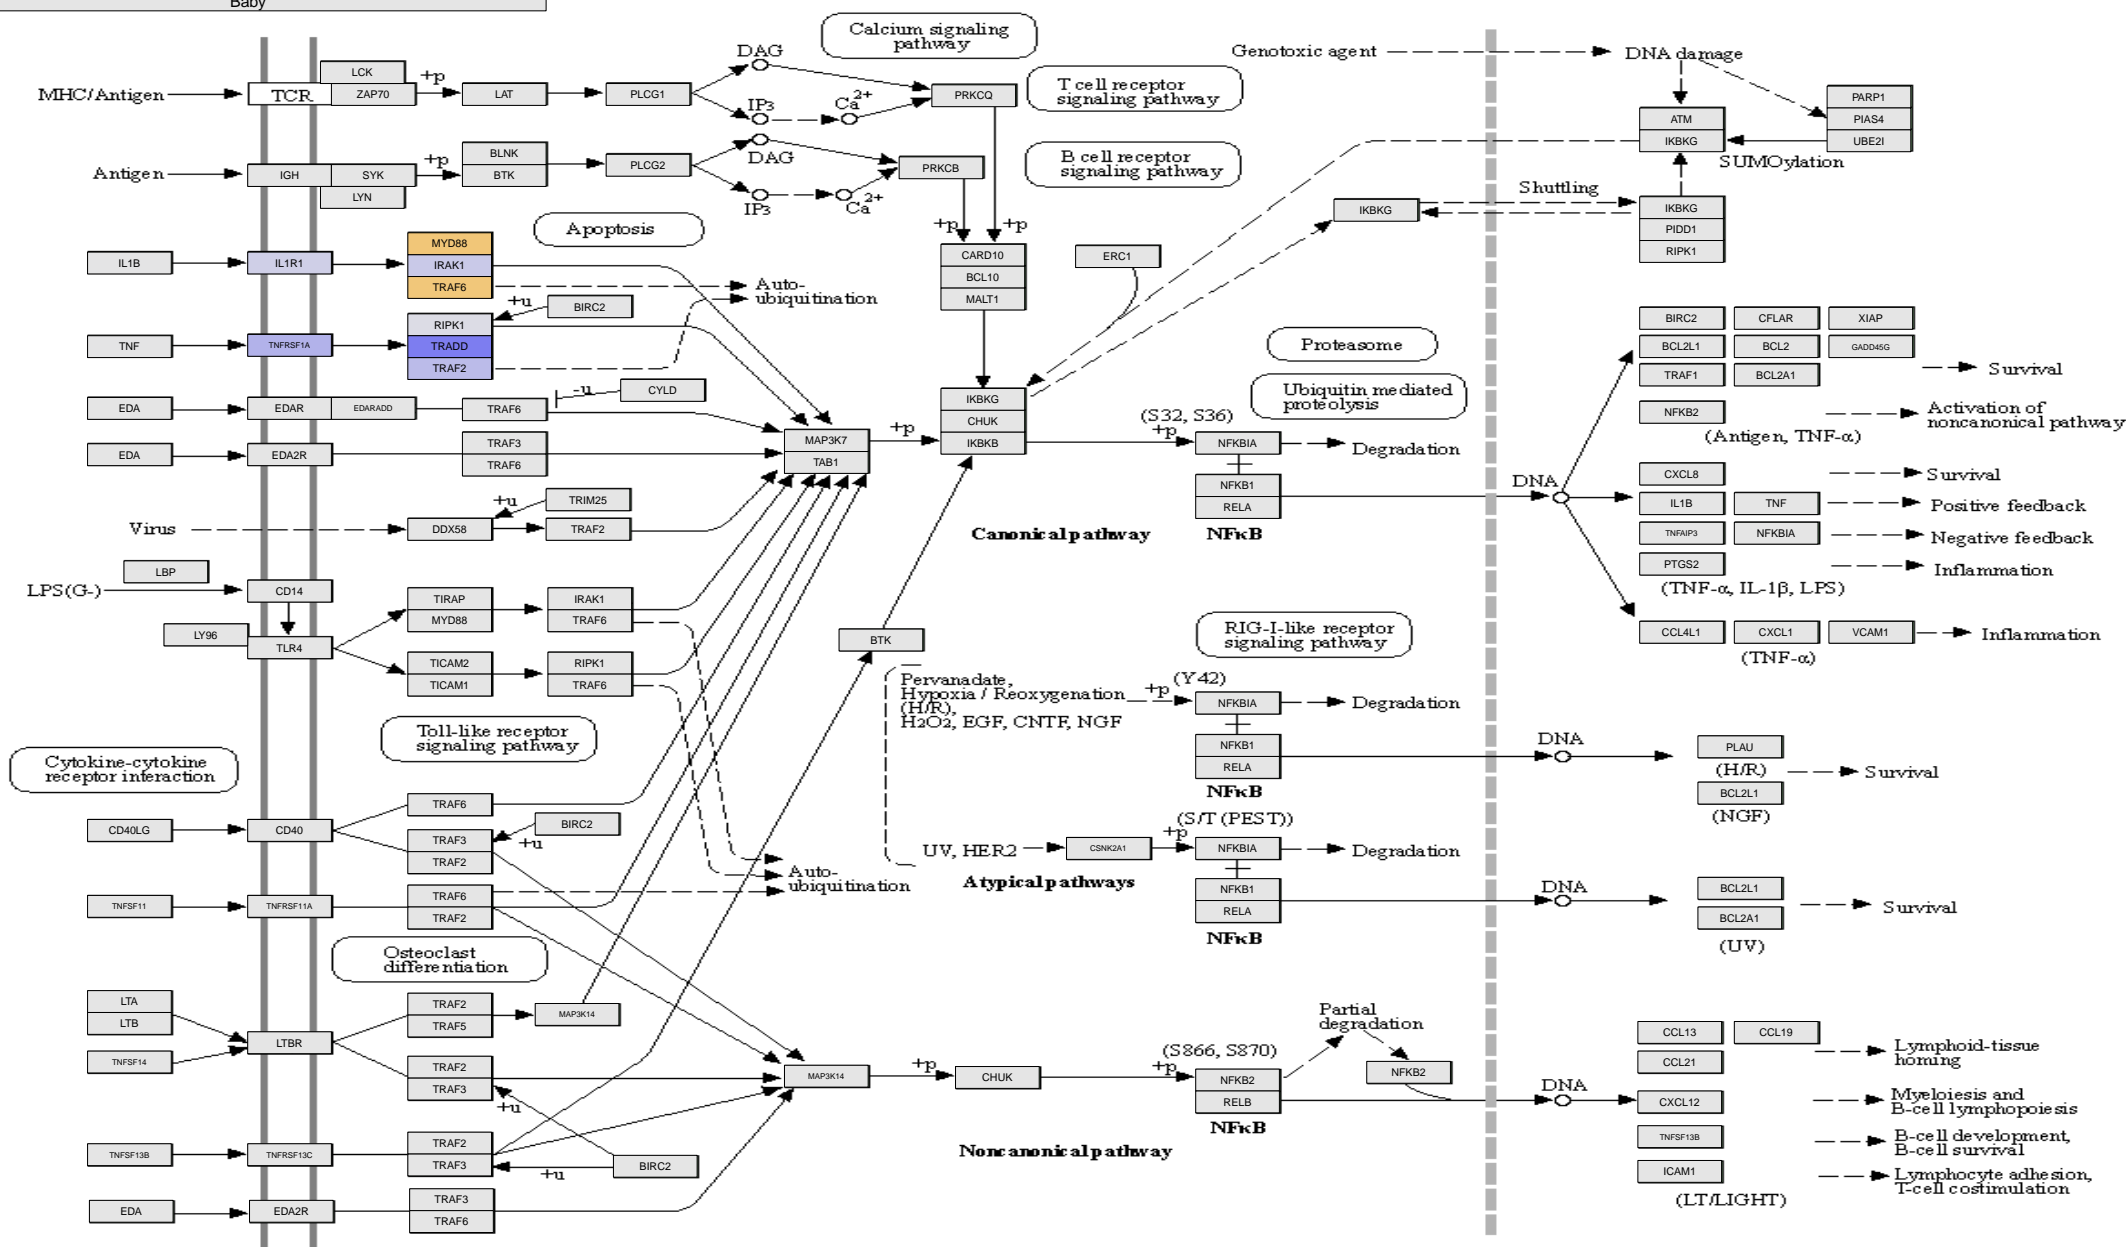



|                              |
|------------------------------|
| NF_kappa_B_signaling_pathway |
| Teenager                     |

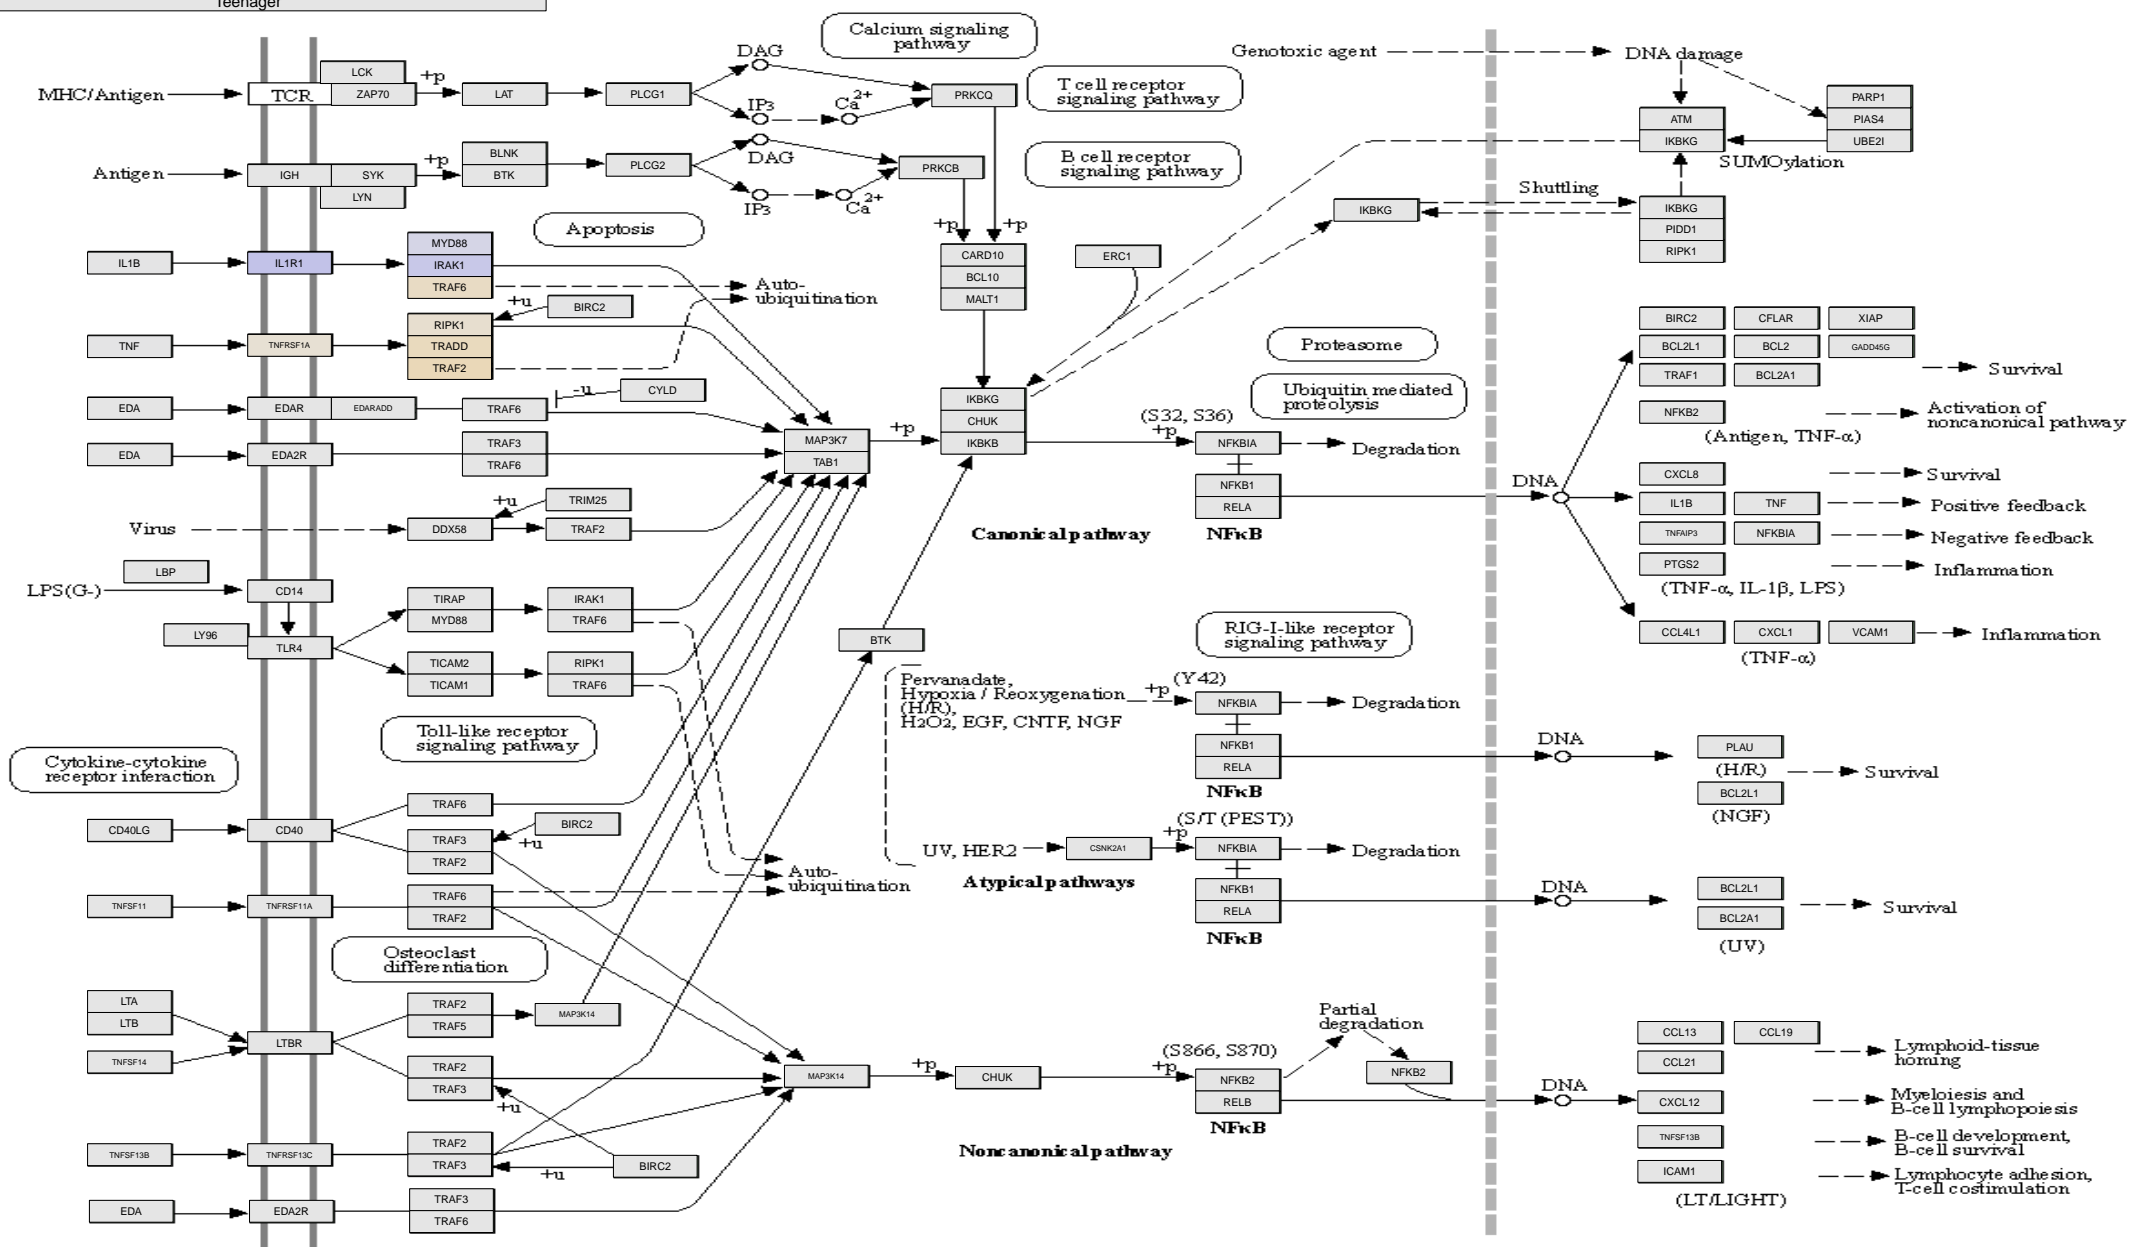

# NF\_kappa\_B\_signaling\_pathway Adult

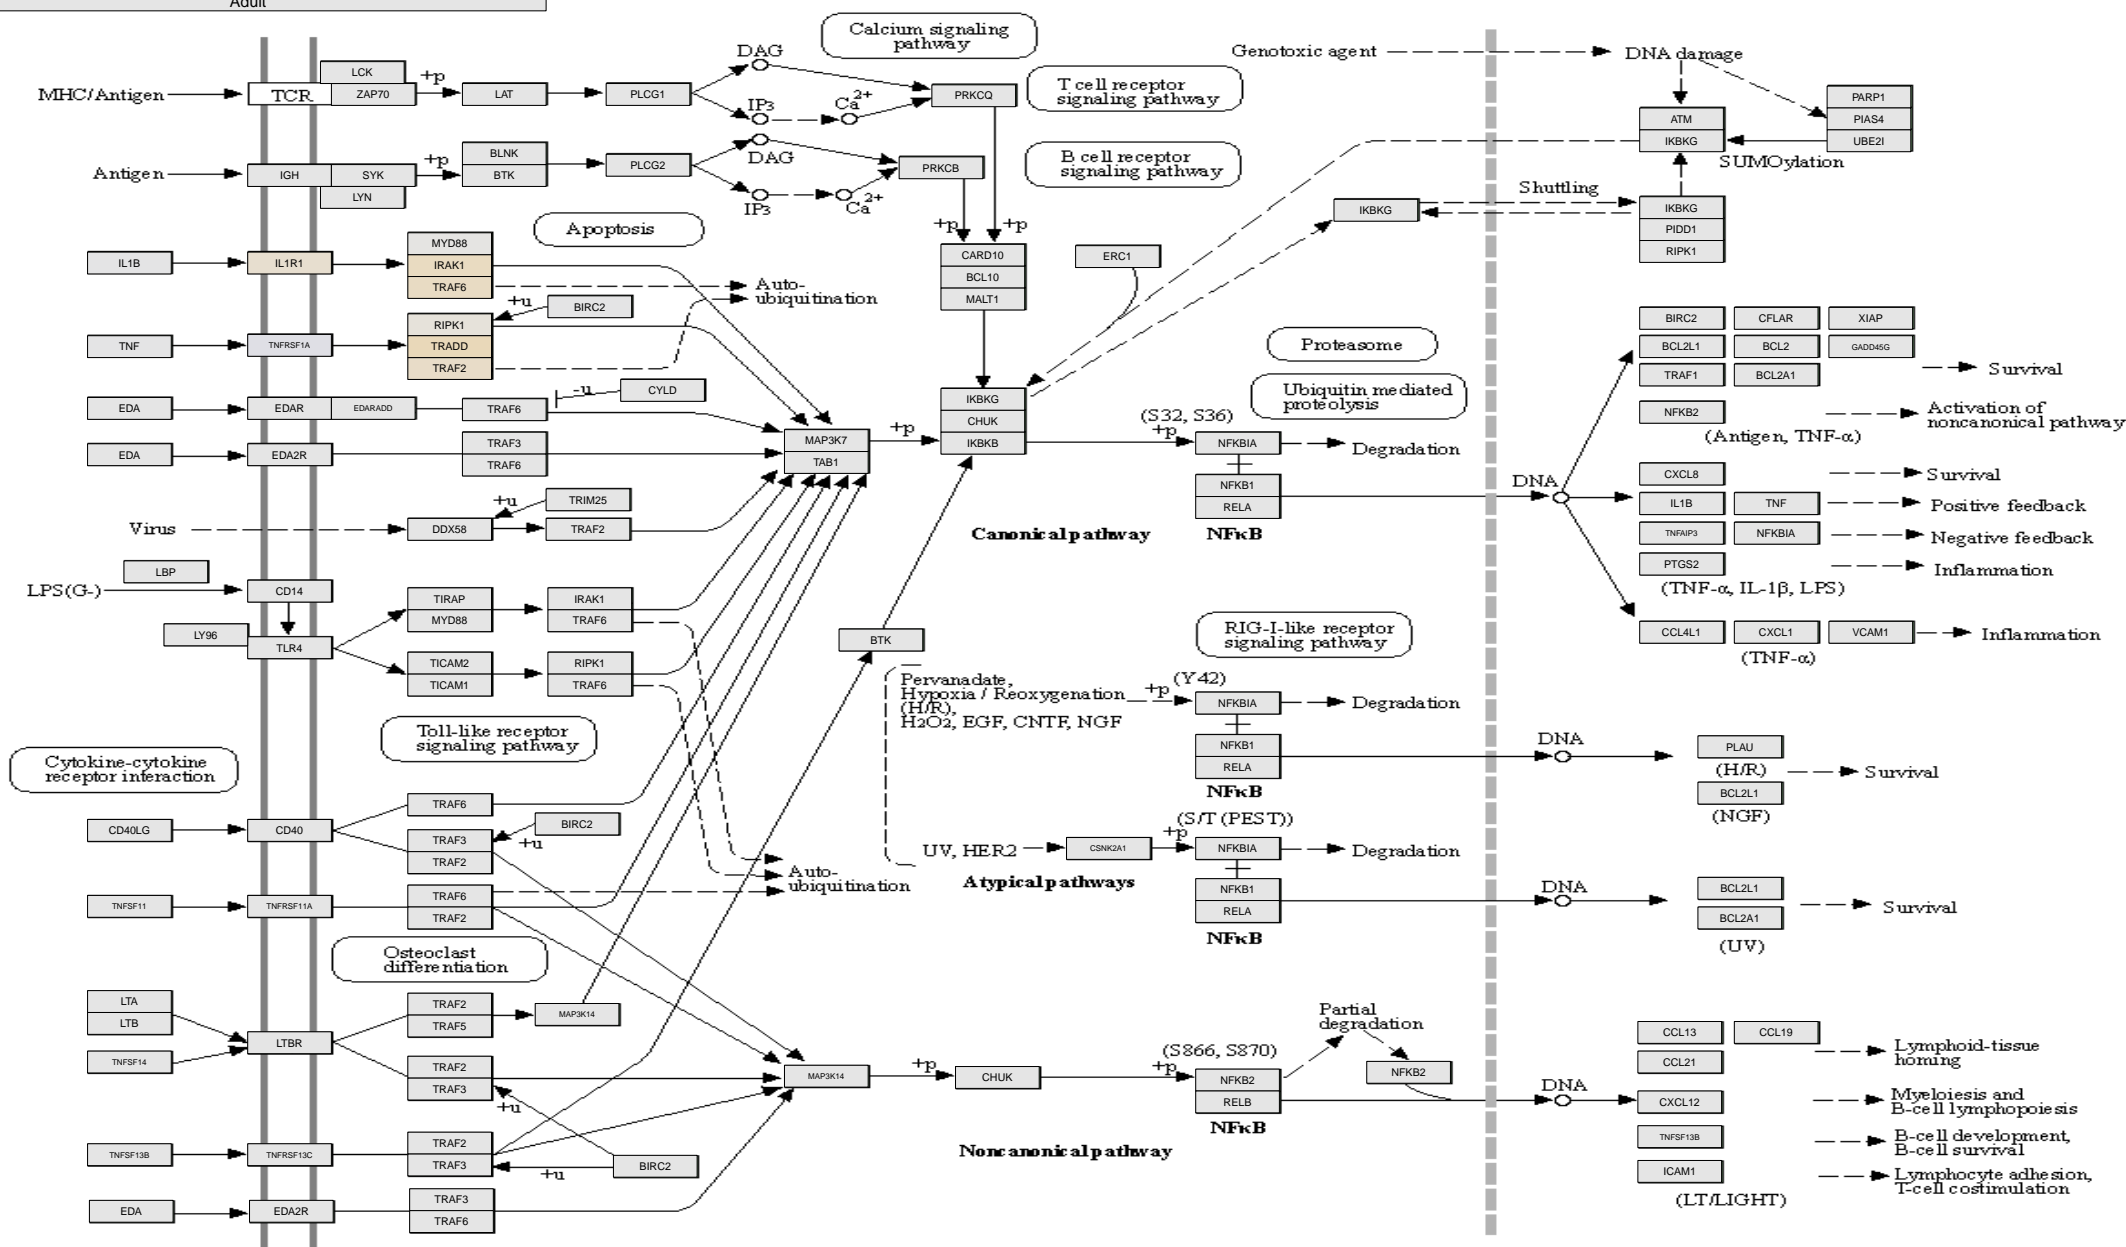



NF\_kappa\_B\_signaling\_pathway  
Late Adult

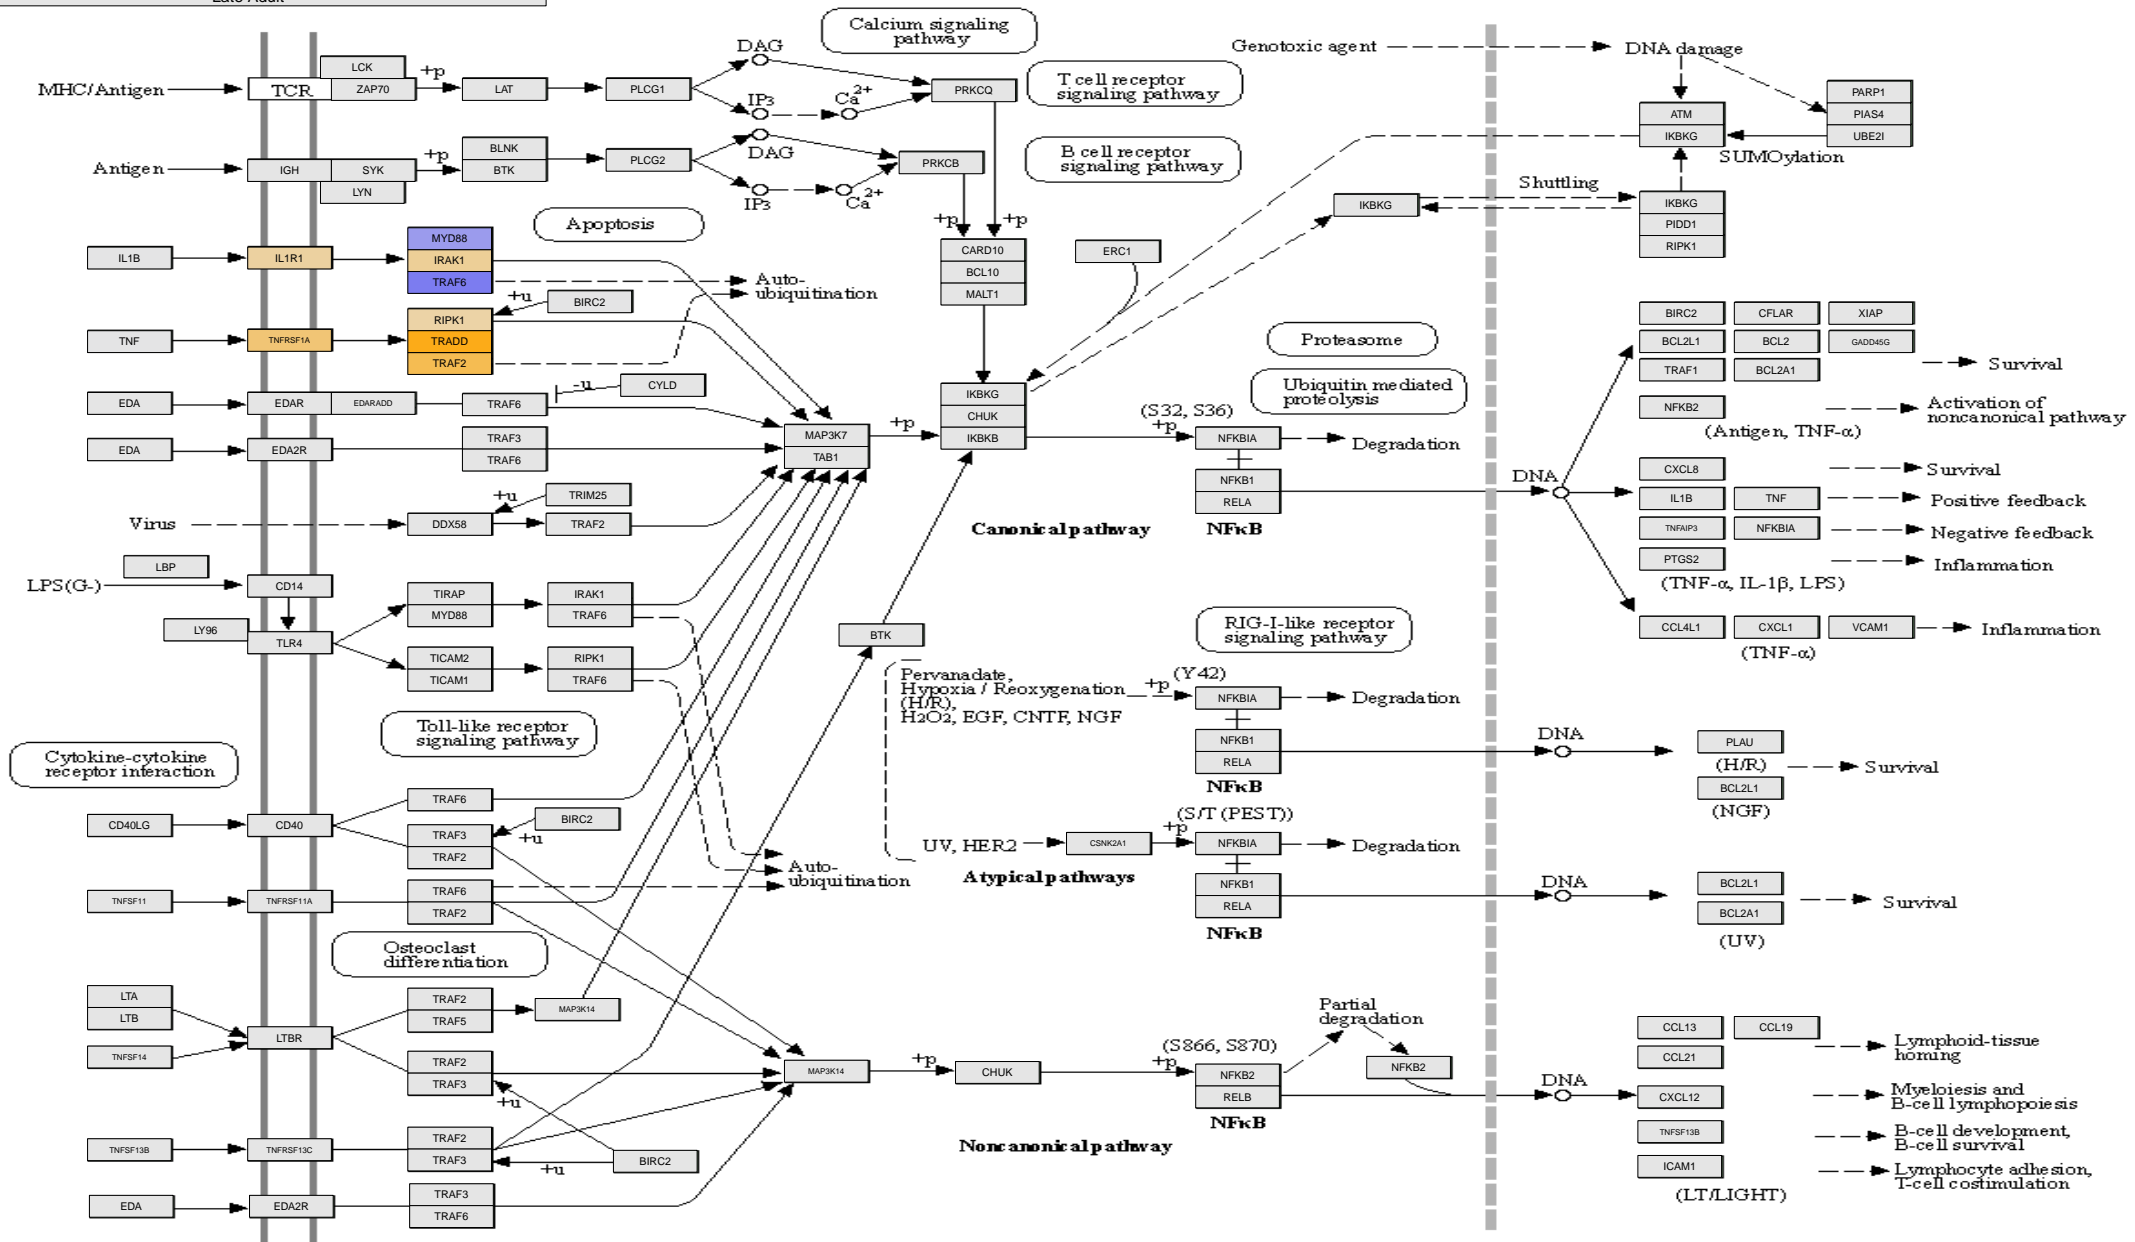

Supplement: s1 [file s1]
