# Supplementary material for: The Transcriptome and Methylome of the Developing and Aging Brain and Their Relations to Gliomas and Psychological Disorders
Source: MDPI journal article supplement (doi:10.3390/cells11030362), 2022-01-21

HIF-1 signaling pathway

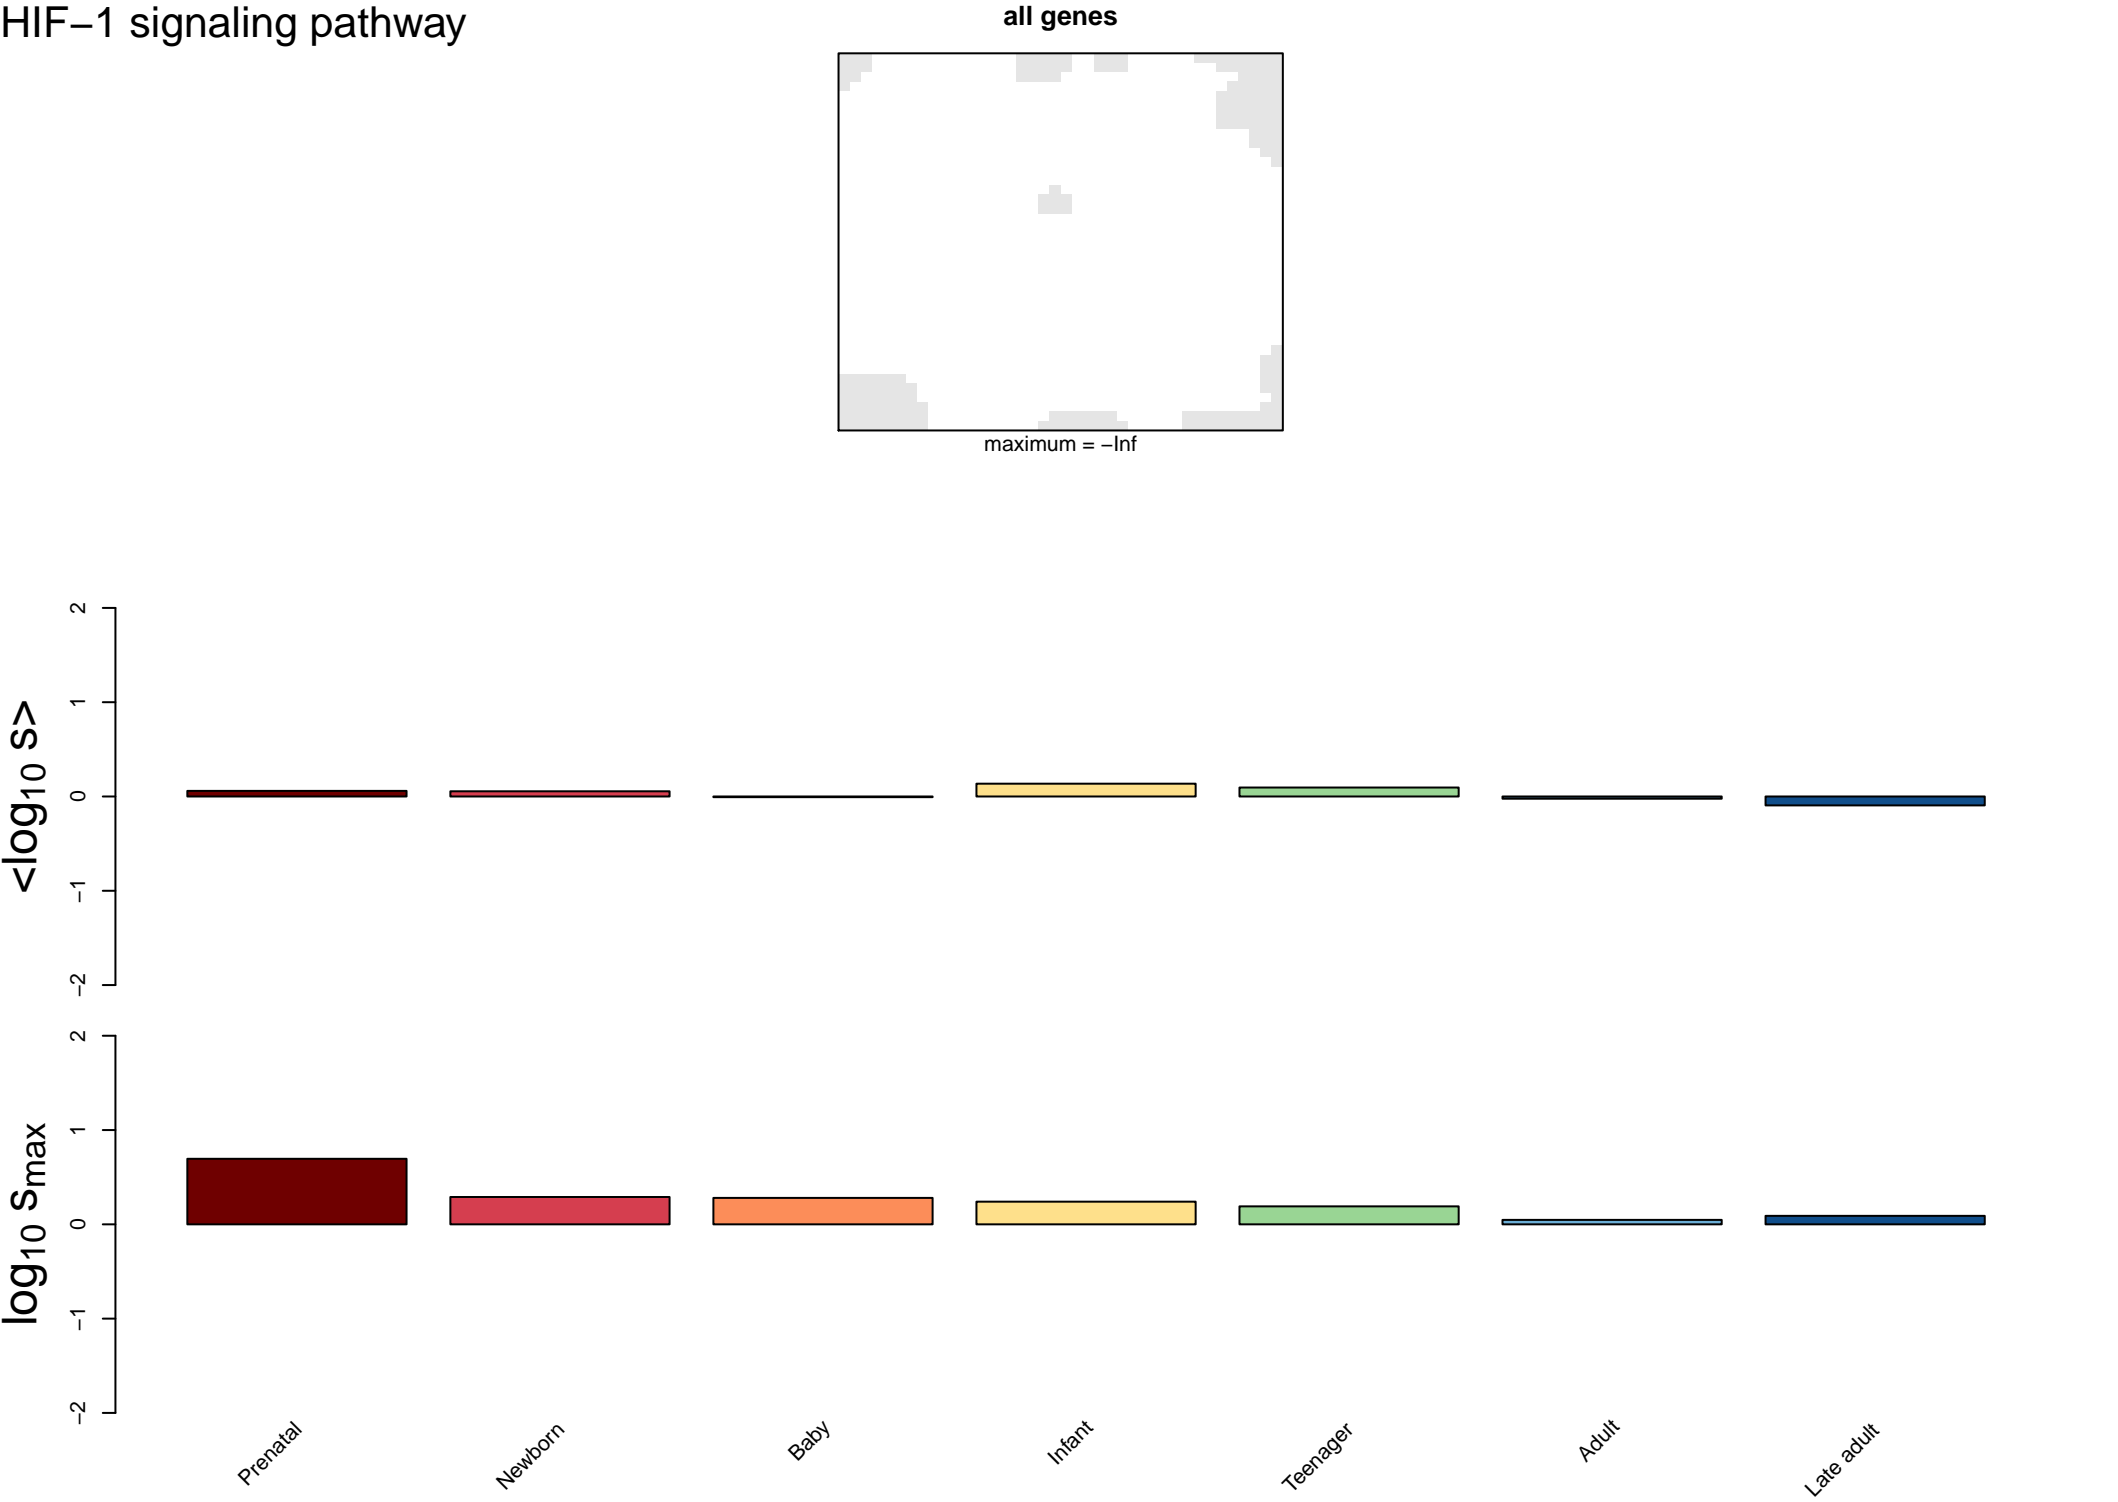

HIF-1 signaling pathway  
genes with data

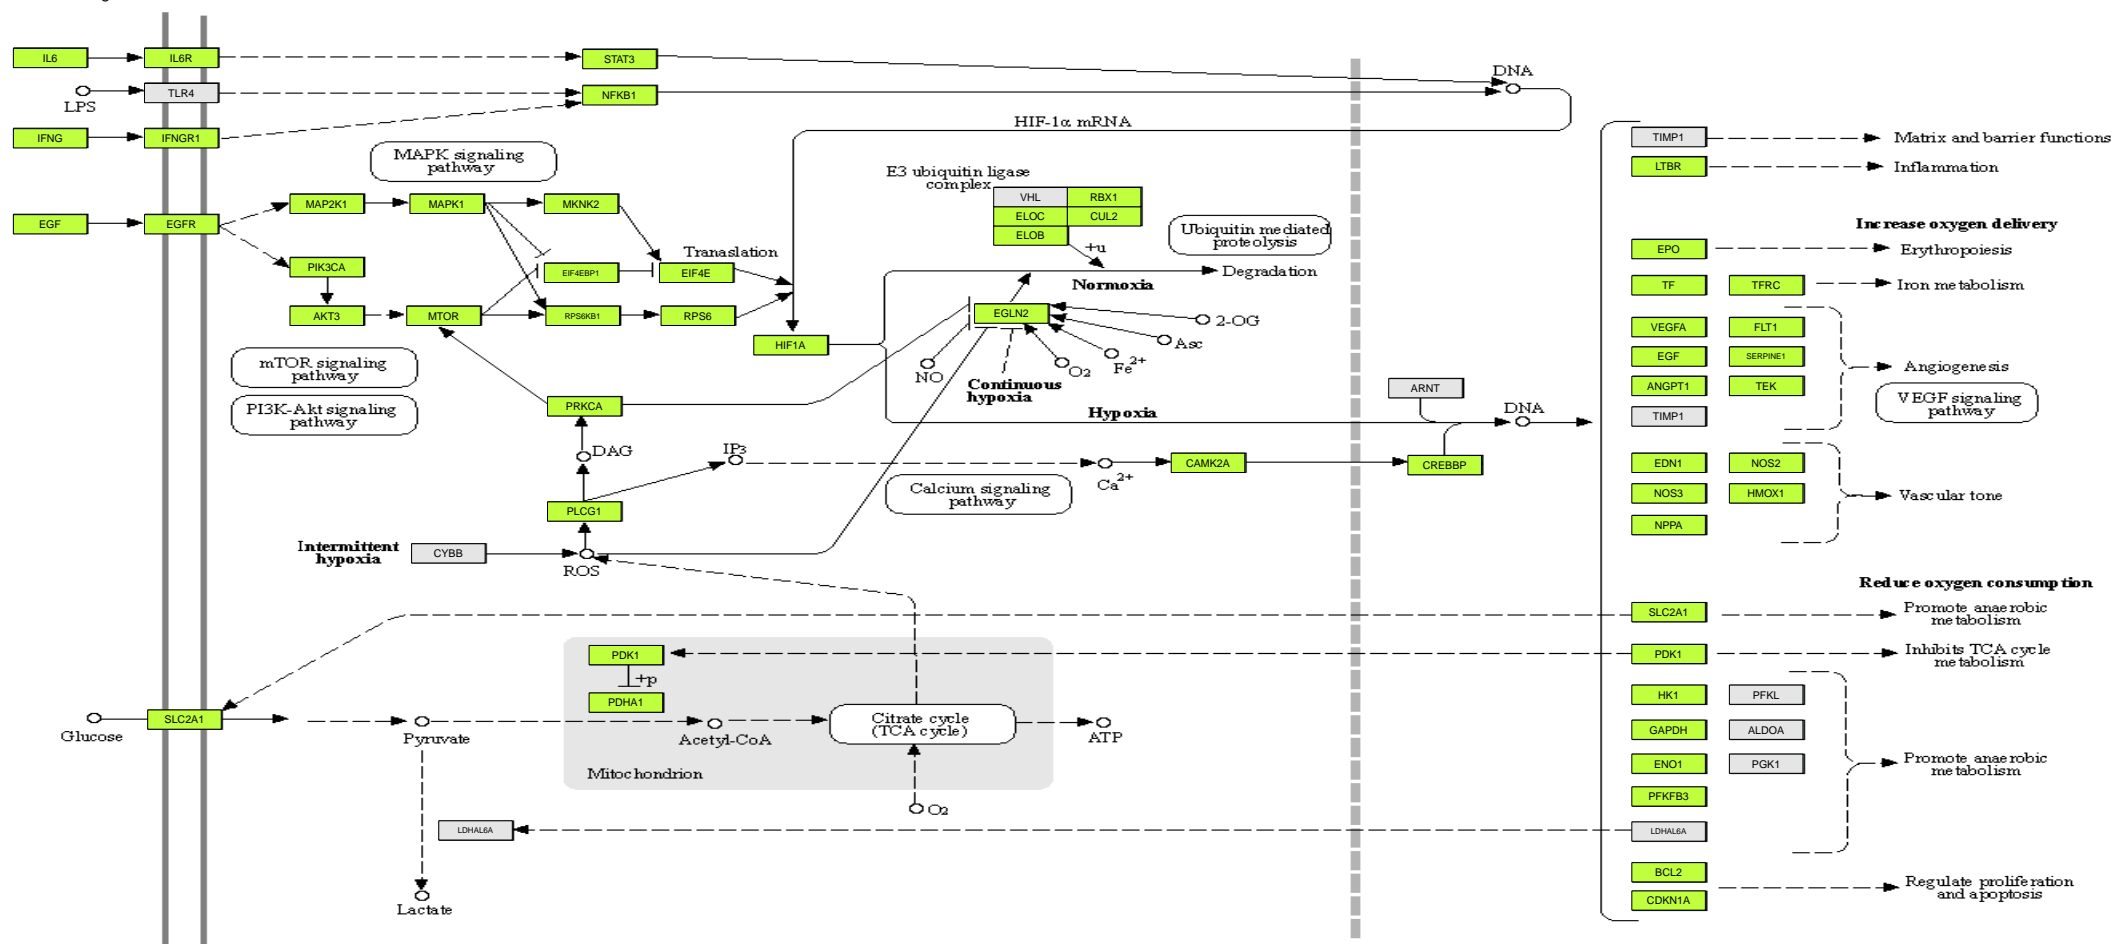

HIF-1 signaling pathway sink nodes

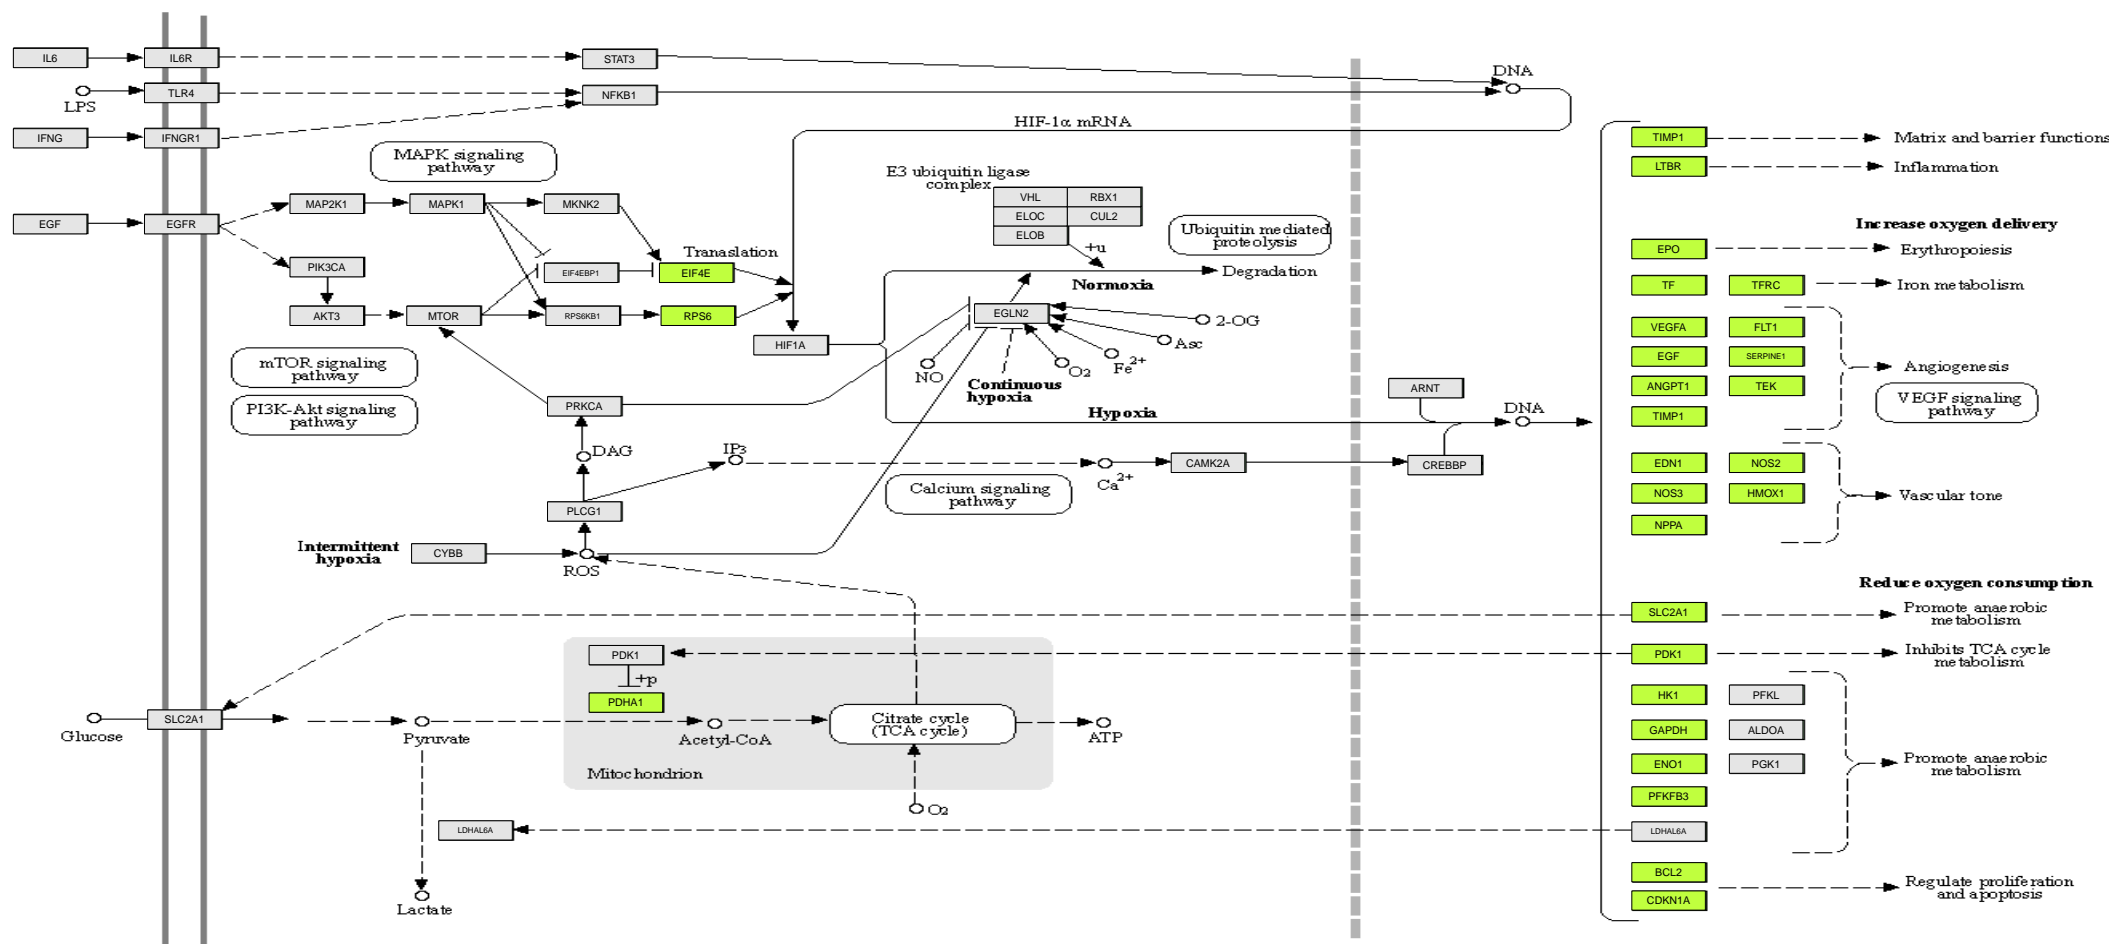

HIF-1 signaling pathway  
Prenatal

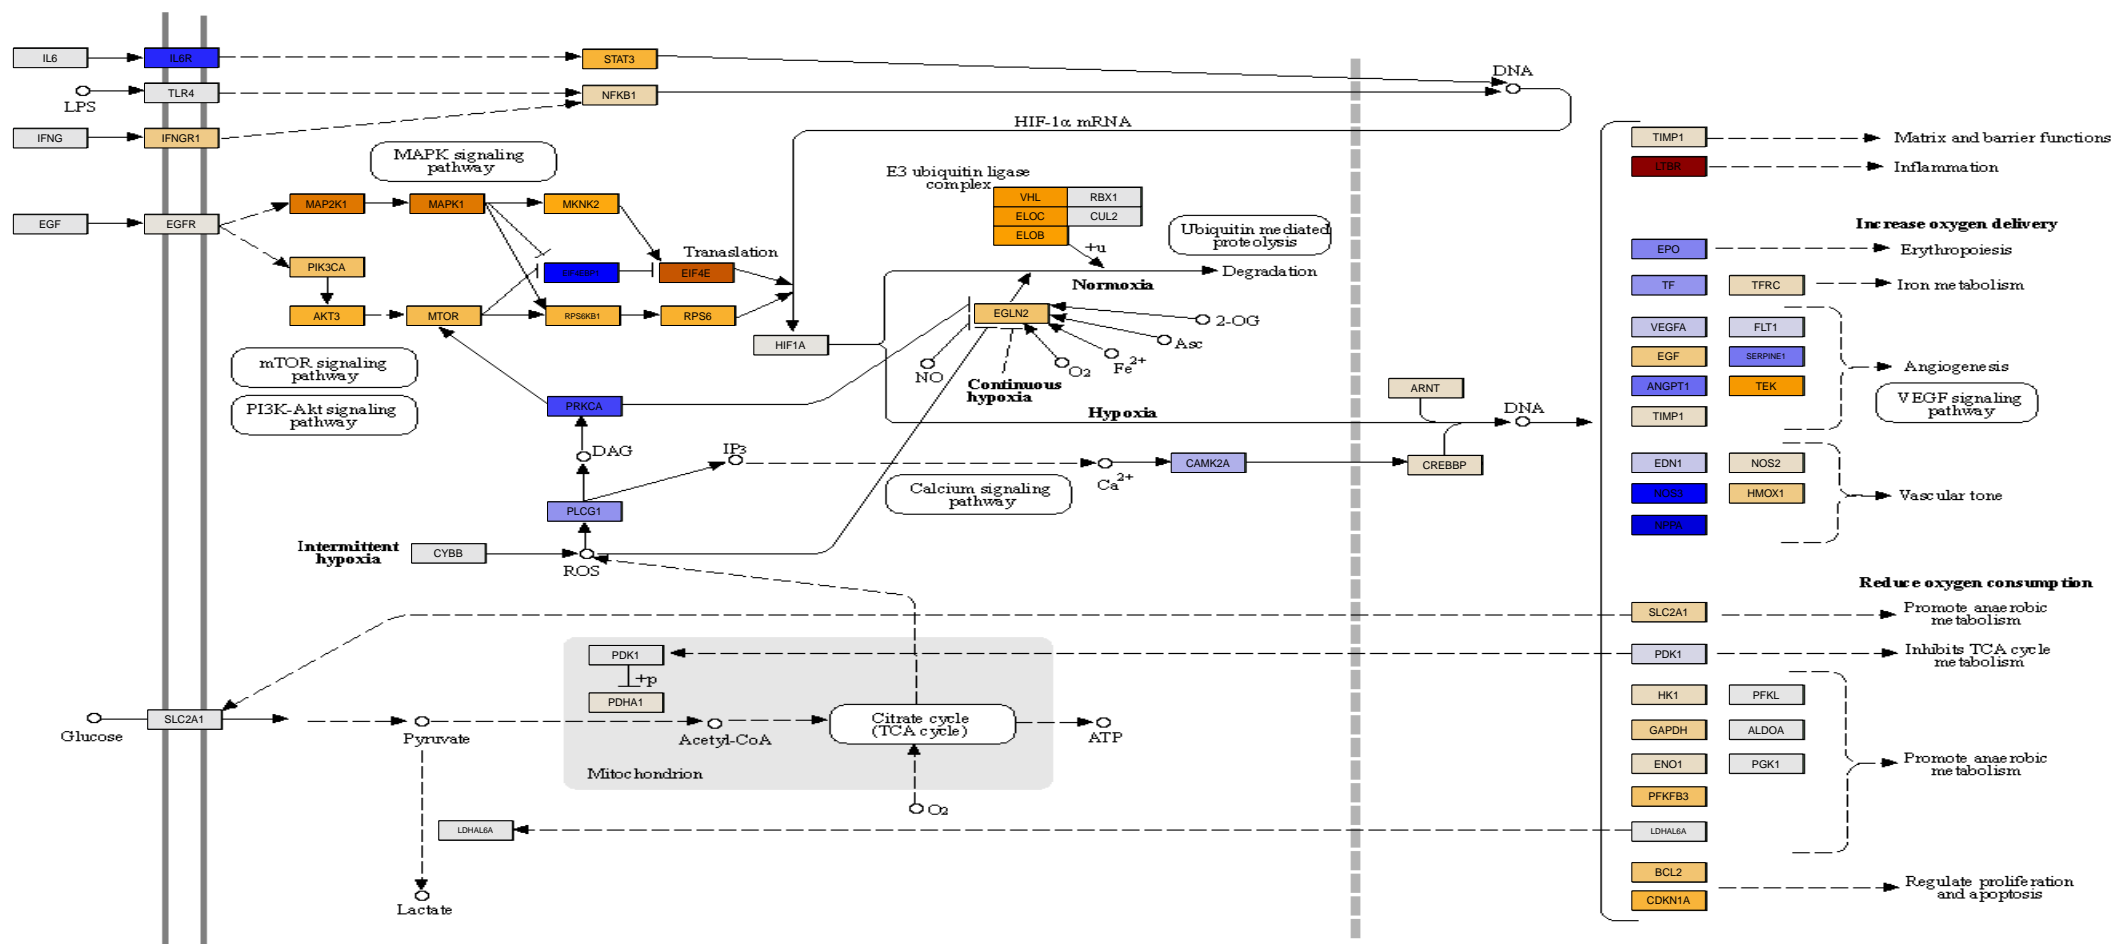

HIF-1 signaling pathway  
Newborn

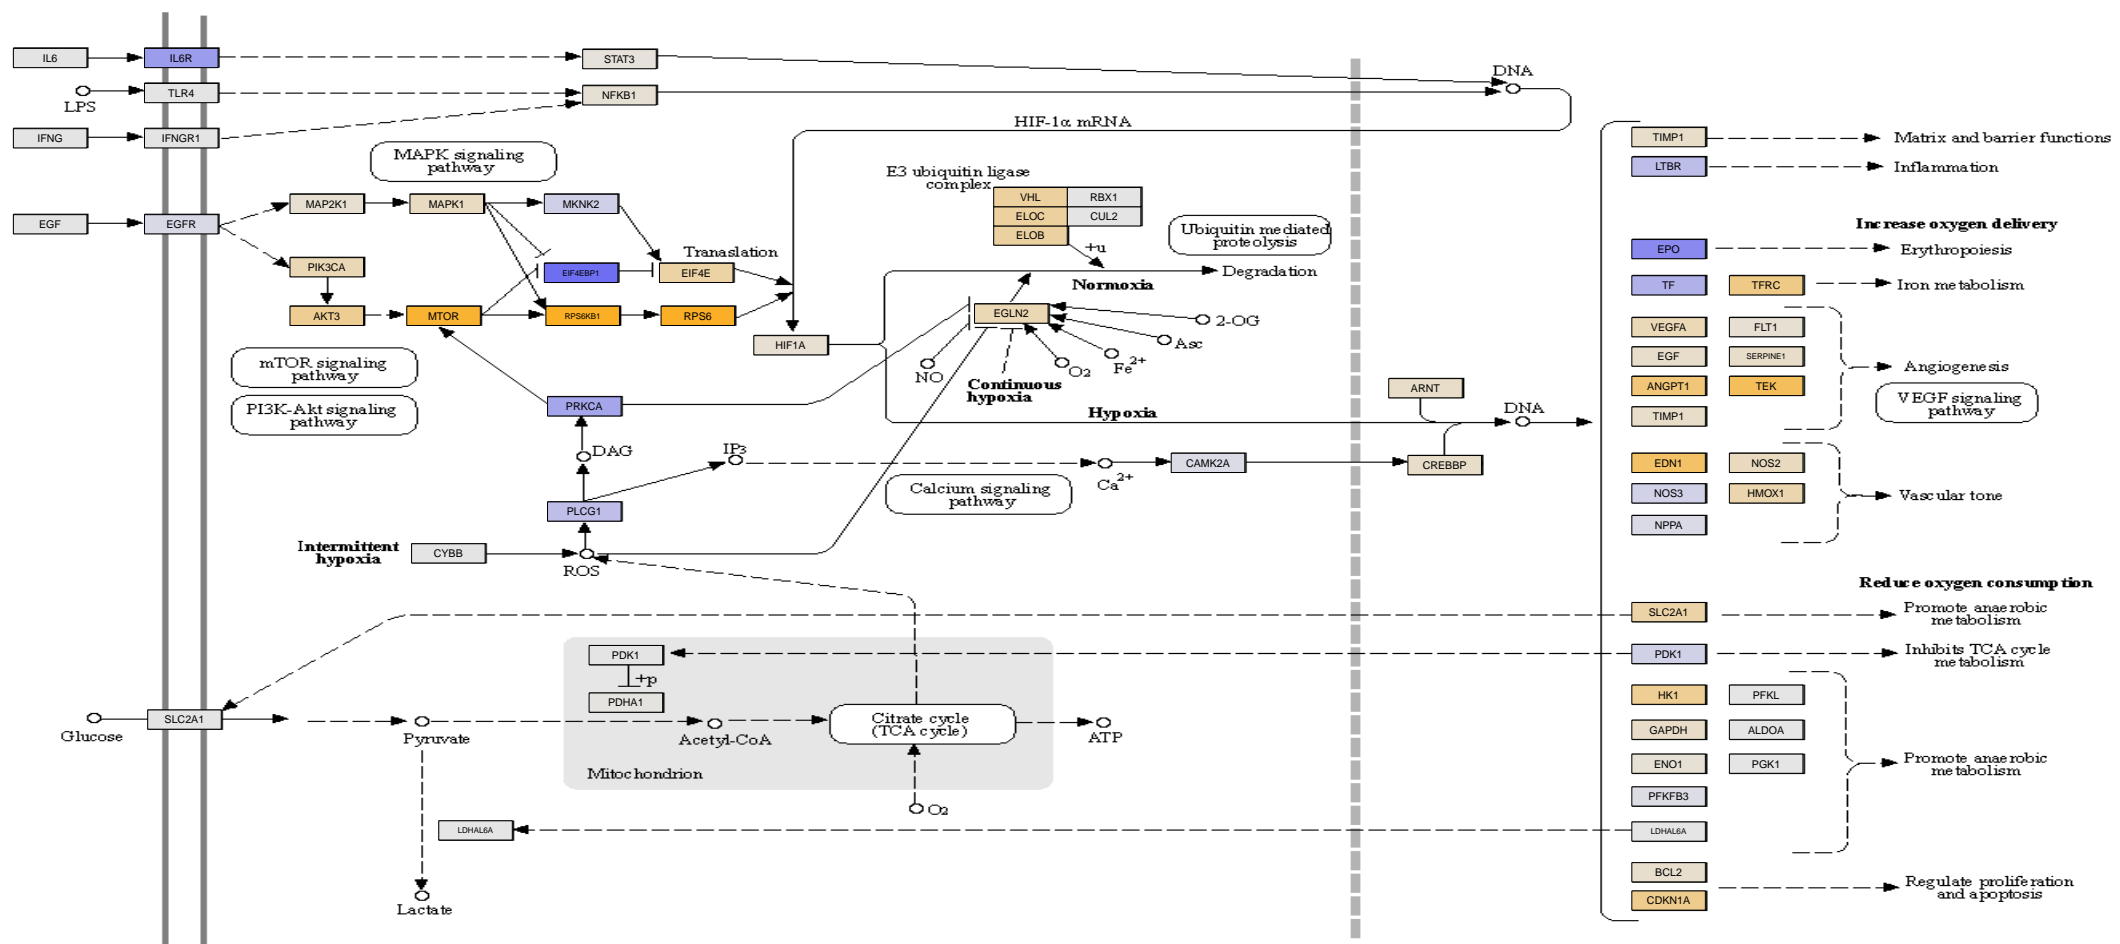



HIF-1 signaling pathway  
Infant

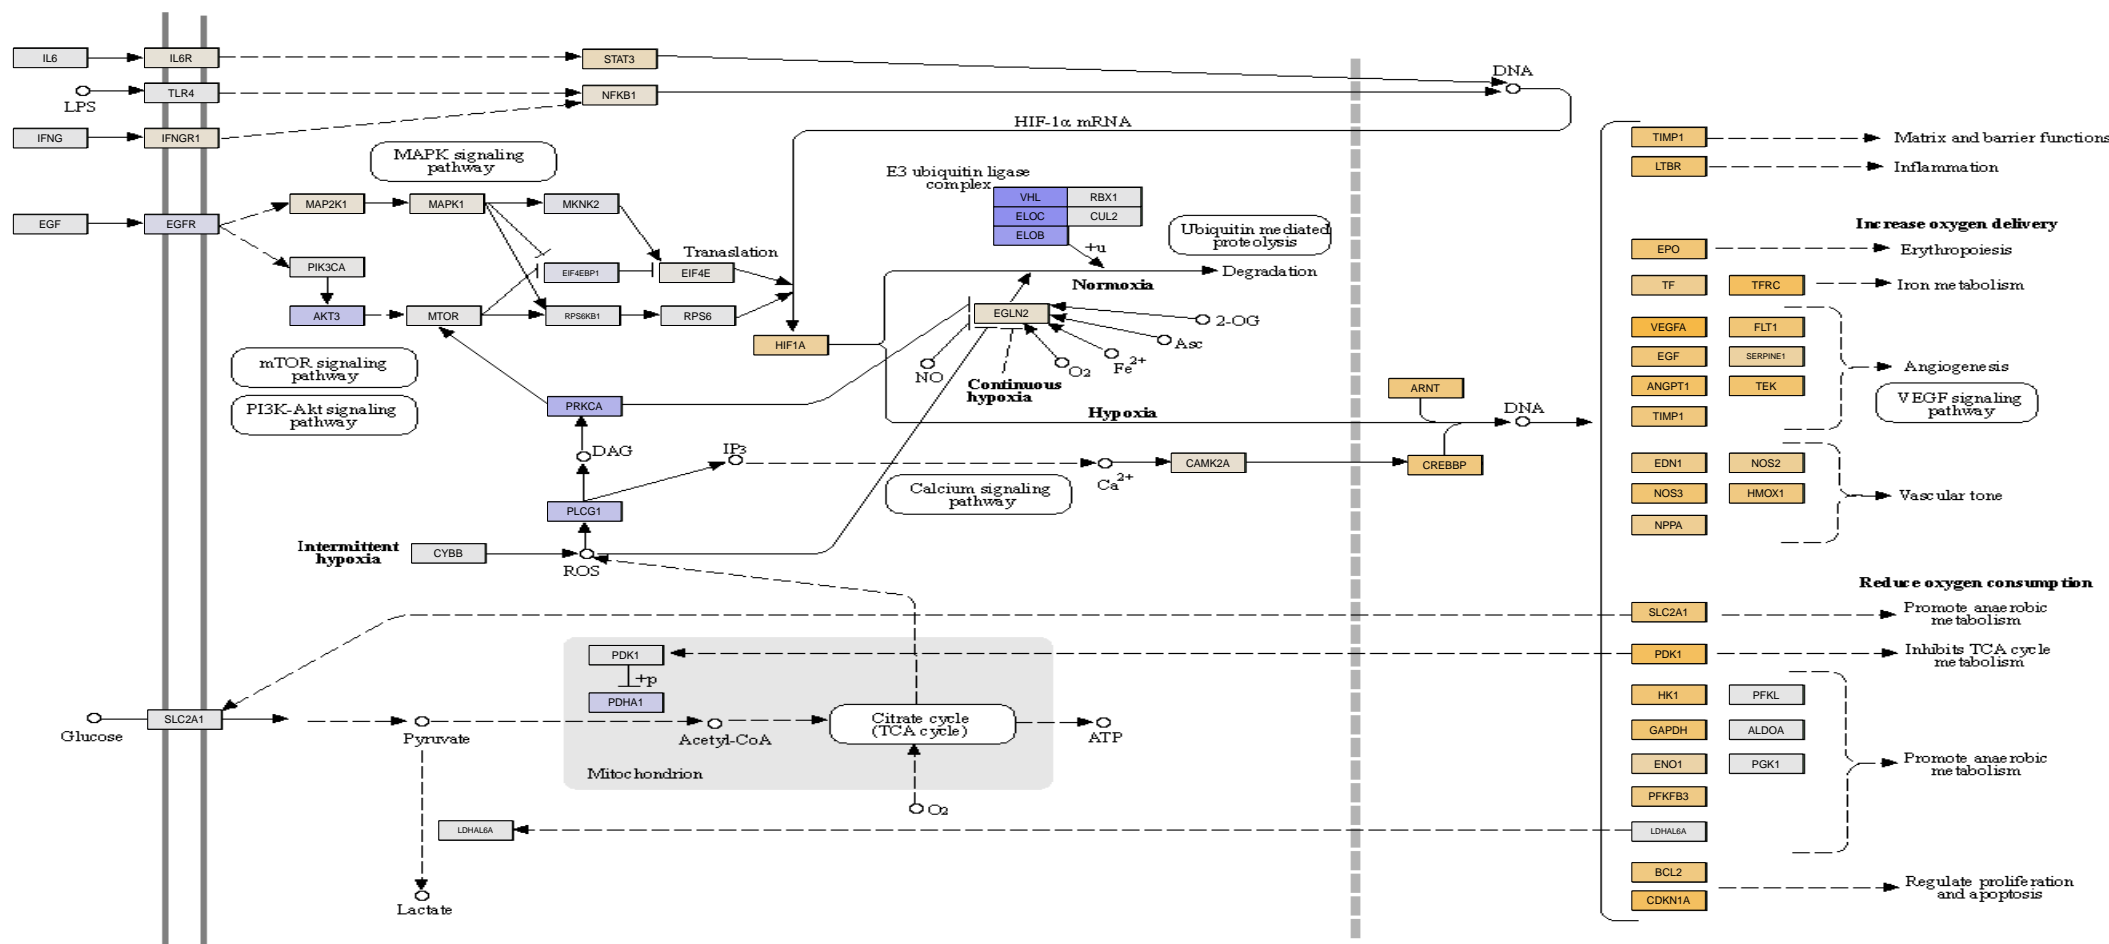

HIF-1 signaling pathway  
Teenager

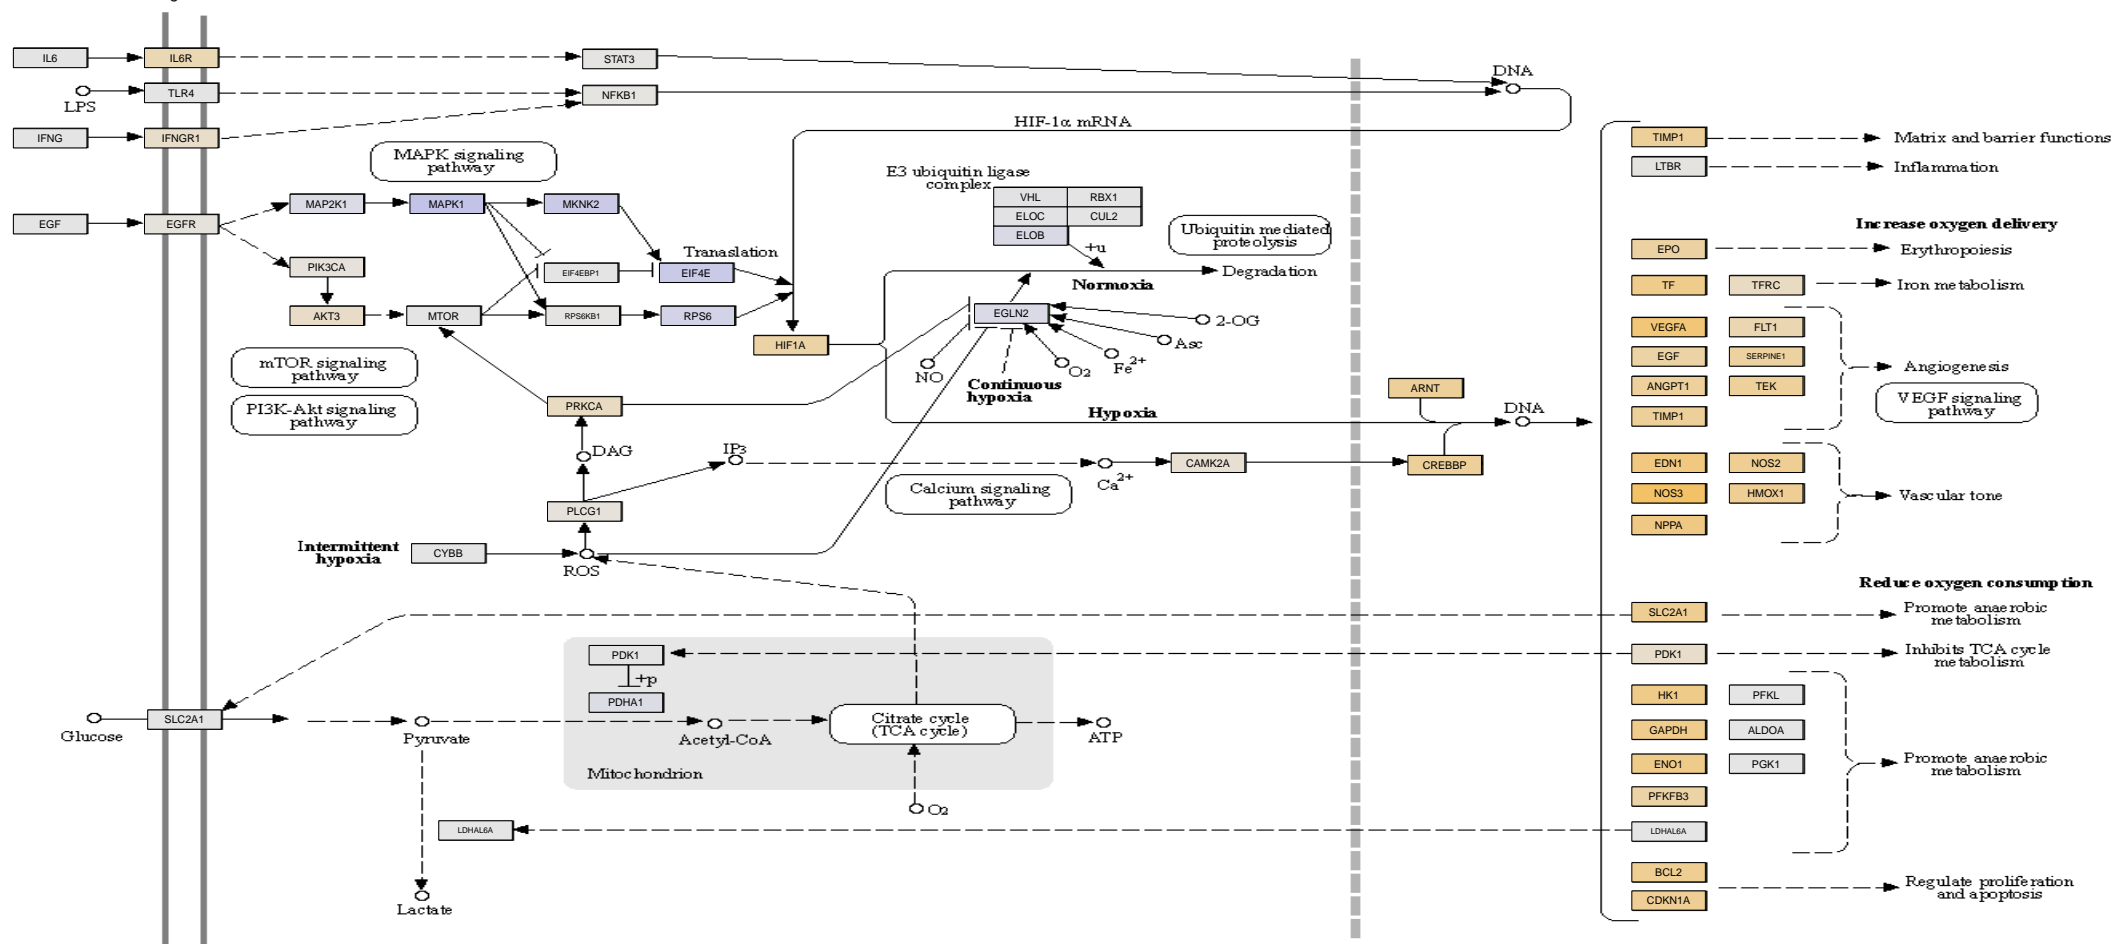



HIF-1 signaling pathway  
Adult

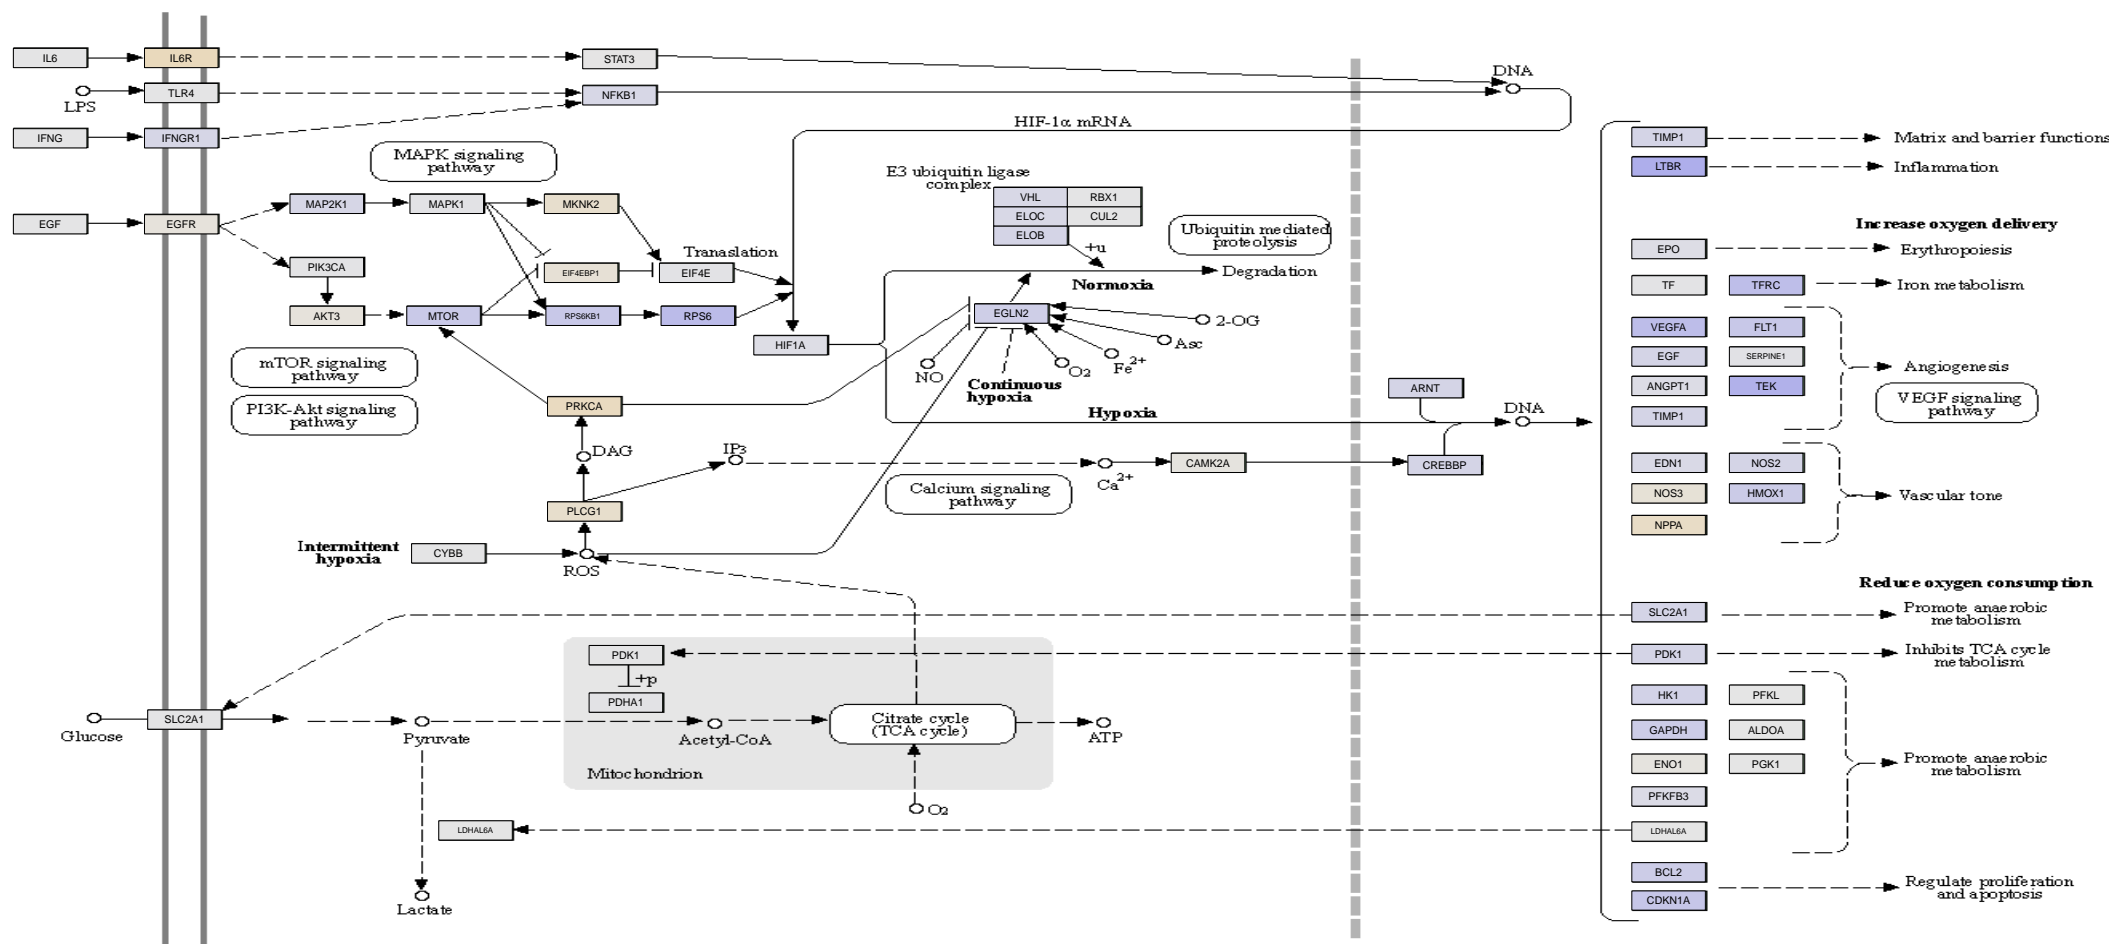

HIF-1 signaling pathway  
Late adult

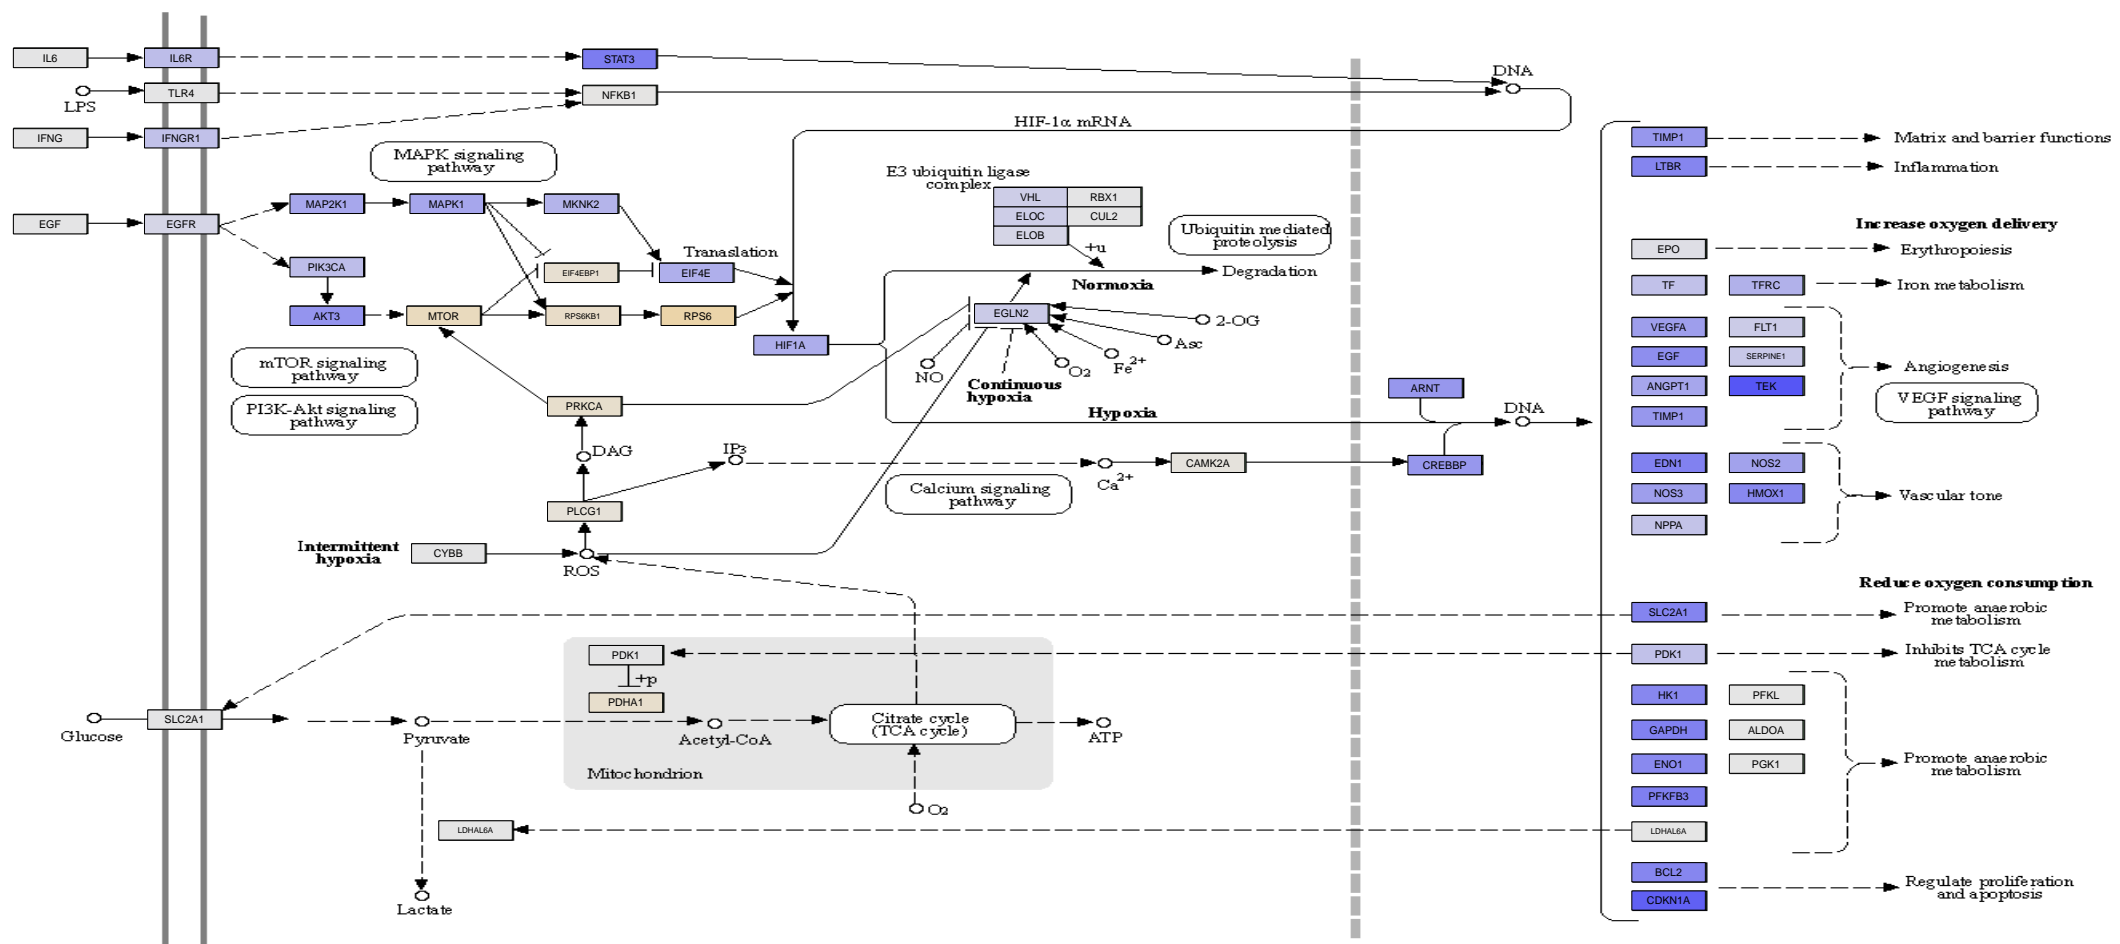

Supplement: s1 [file s1]
