# Supplementary material for: The Transcriptome and Methylome of the Developing and Aging Brain and Their Relations to Gliomas and Psychological Disorders
Source: MDPI journal article supplement (doi:10.3390/cells11030362), 2022-01-21

AMPK signaling pathway

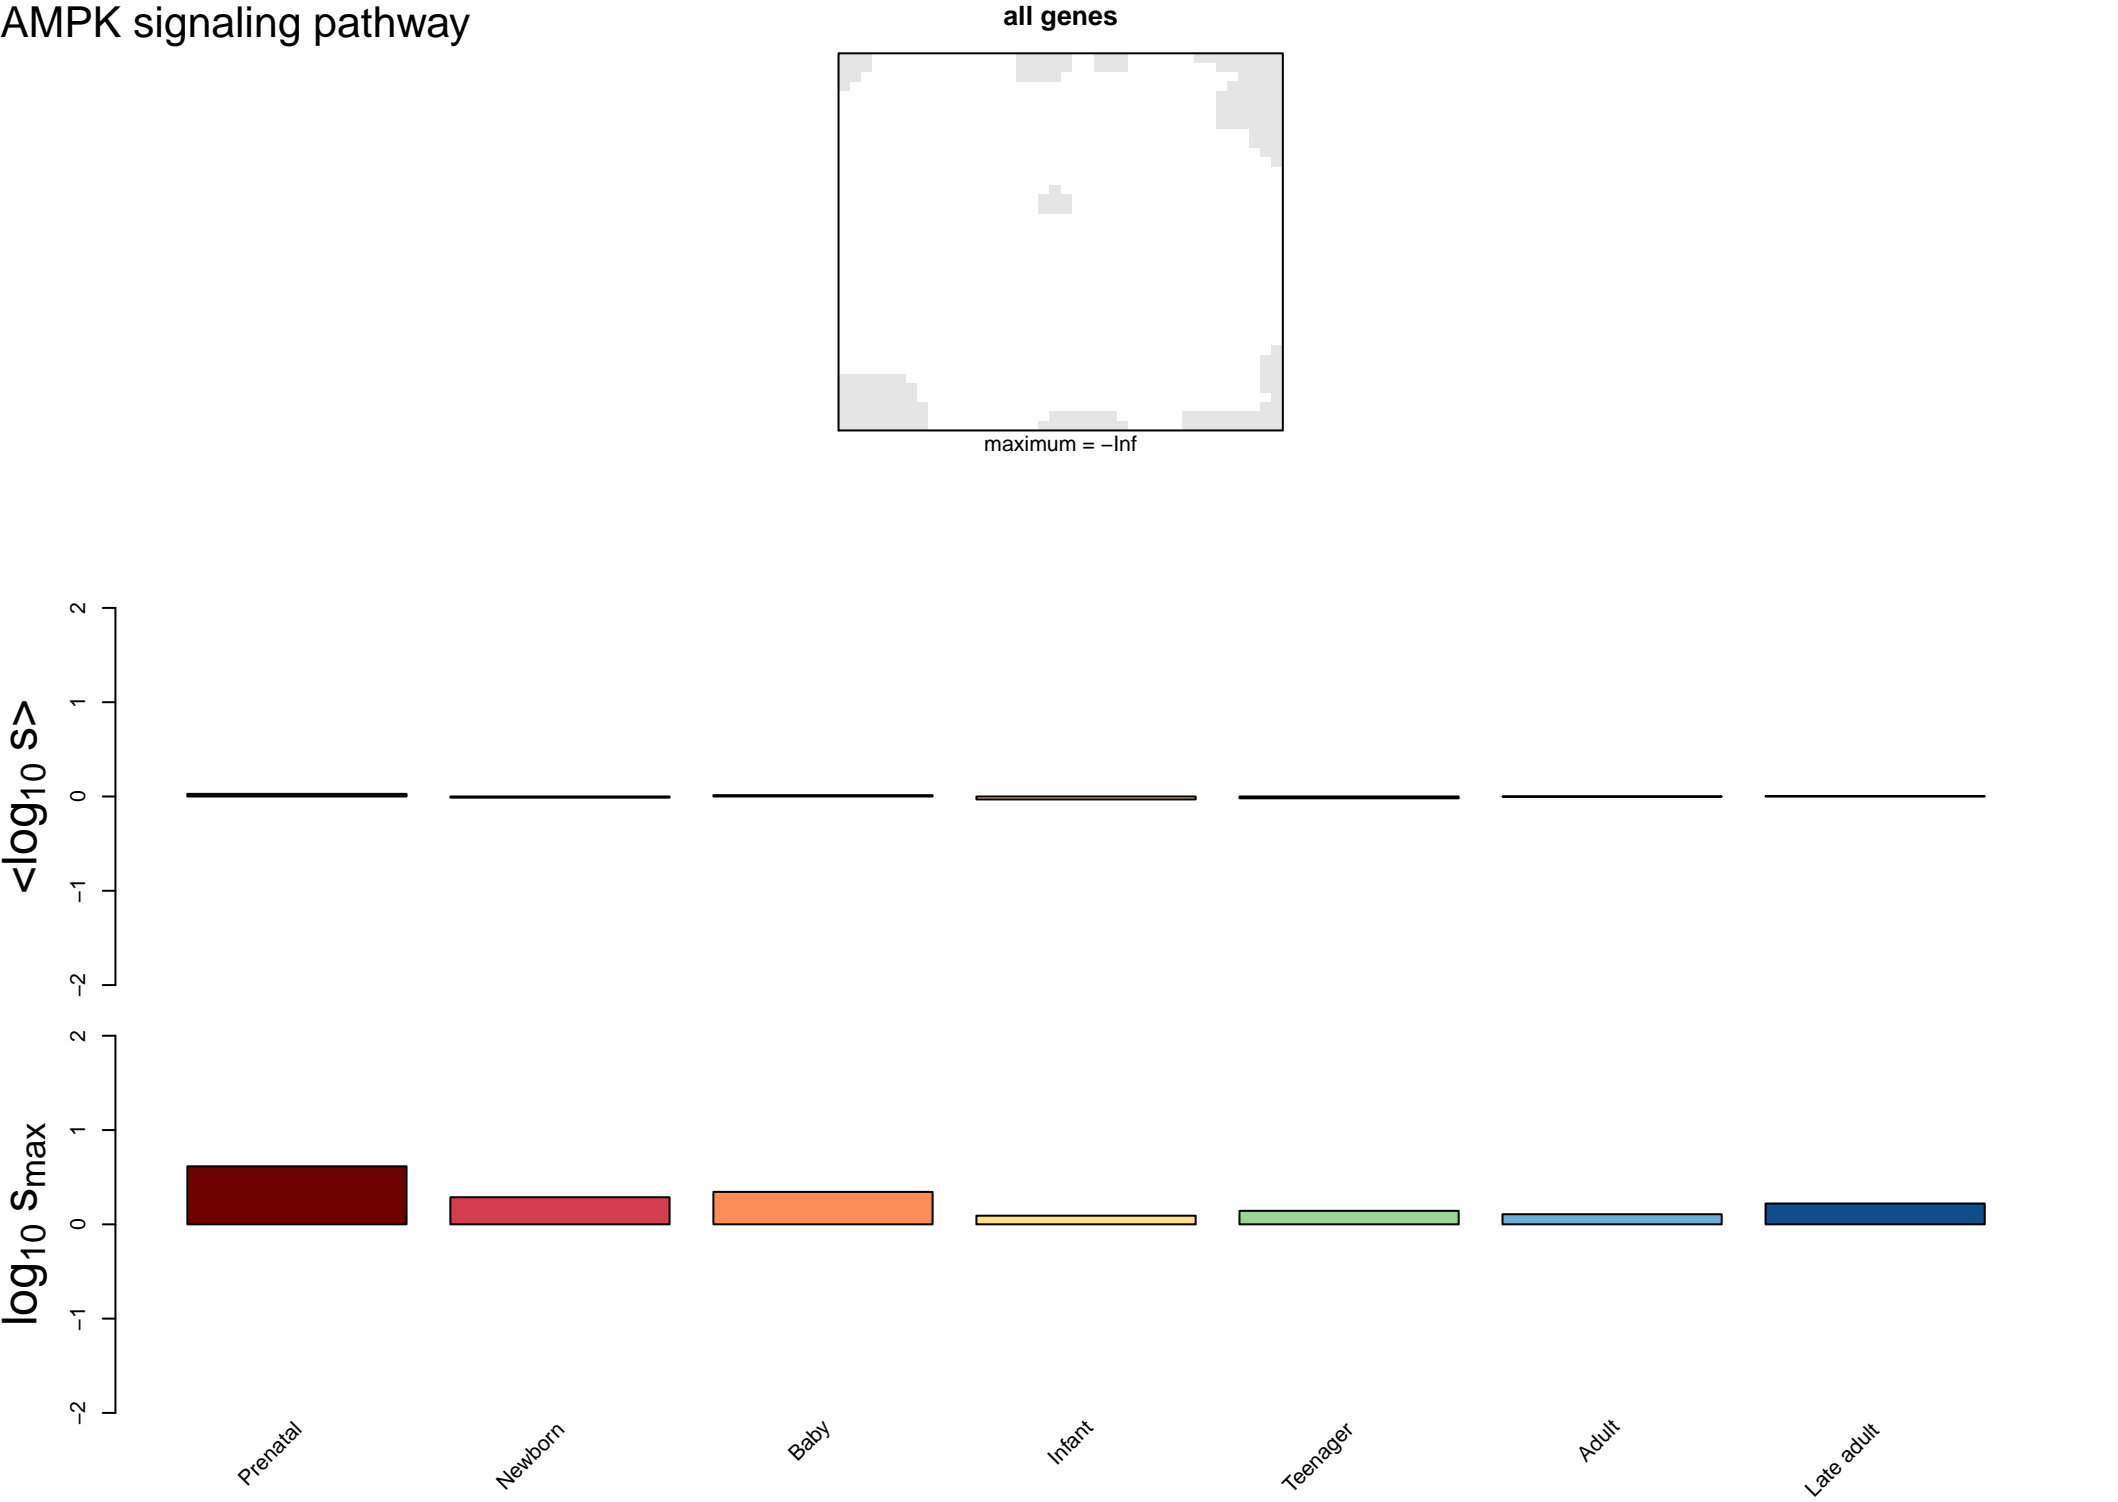

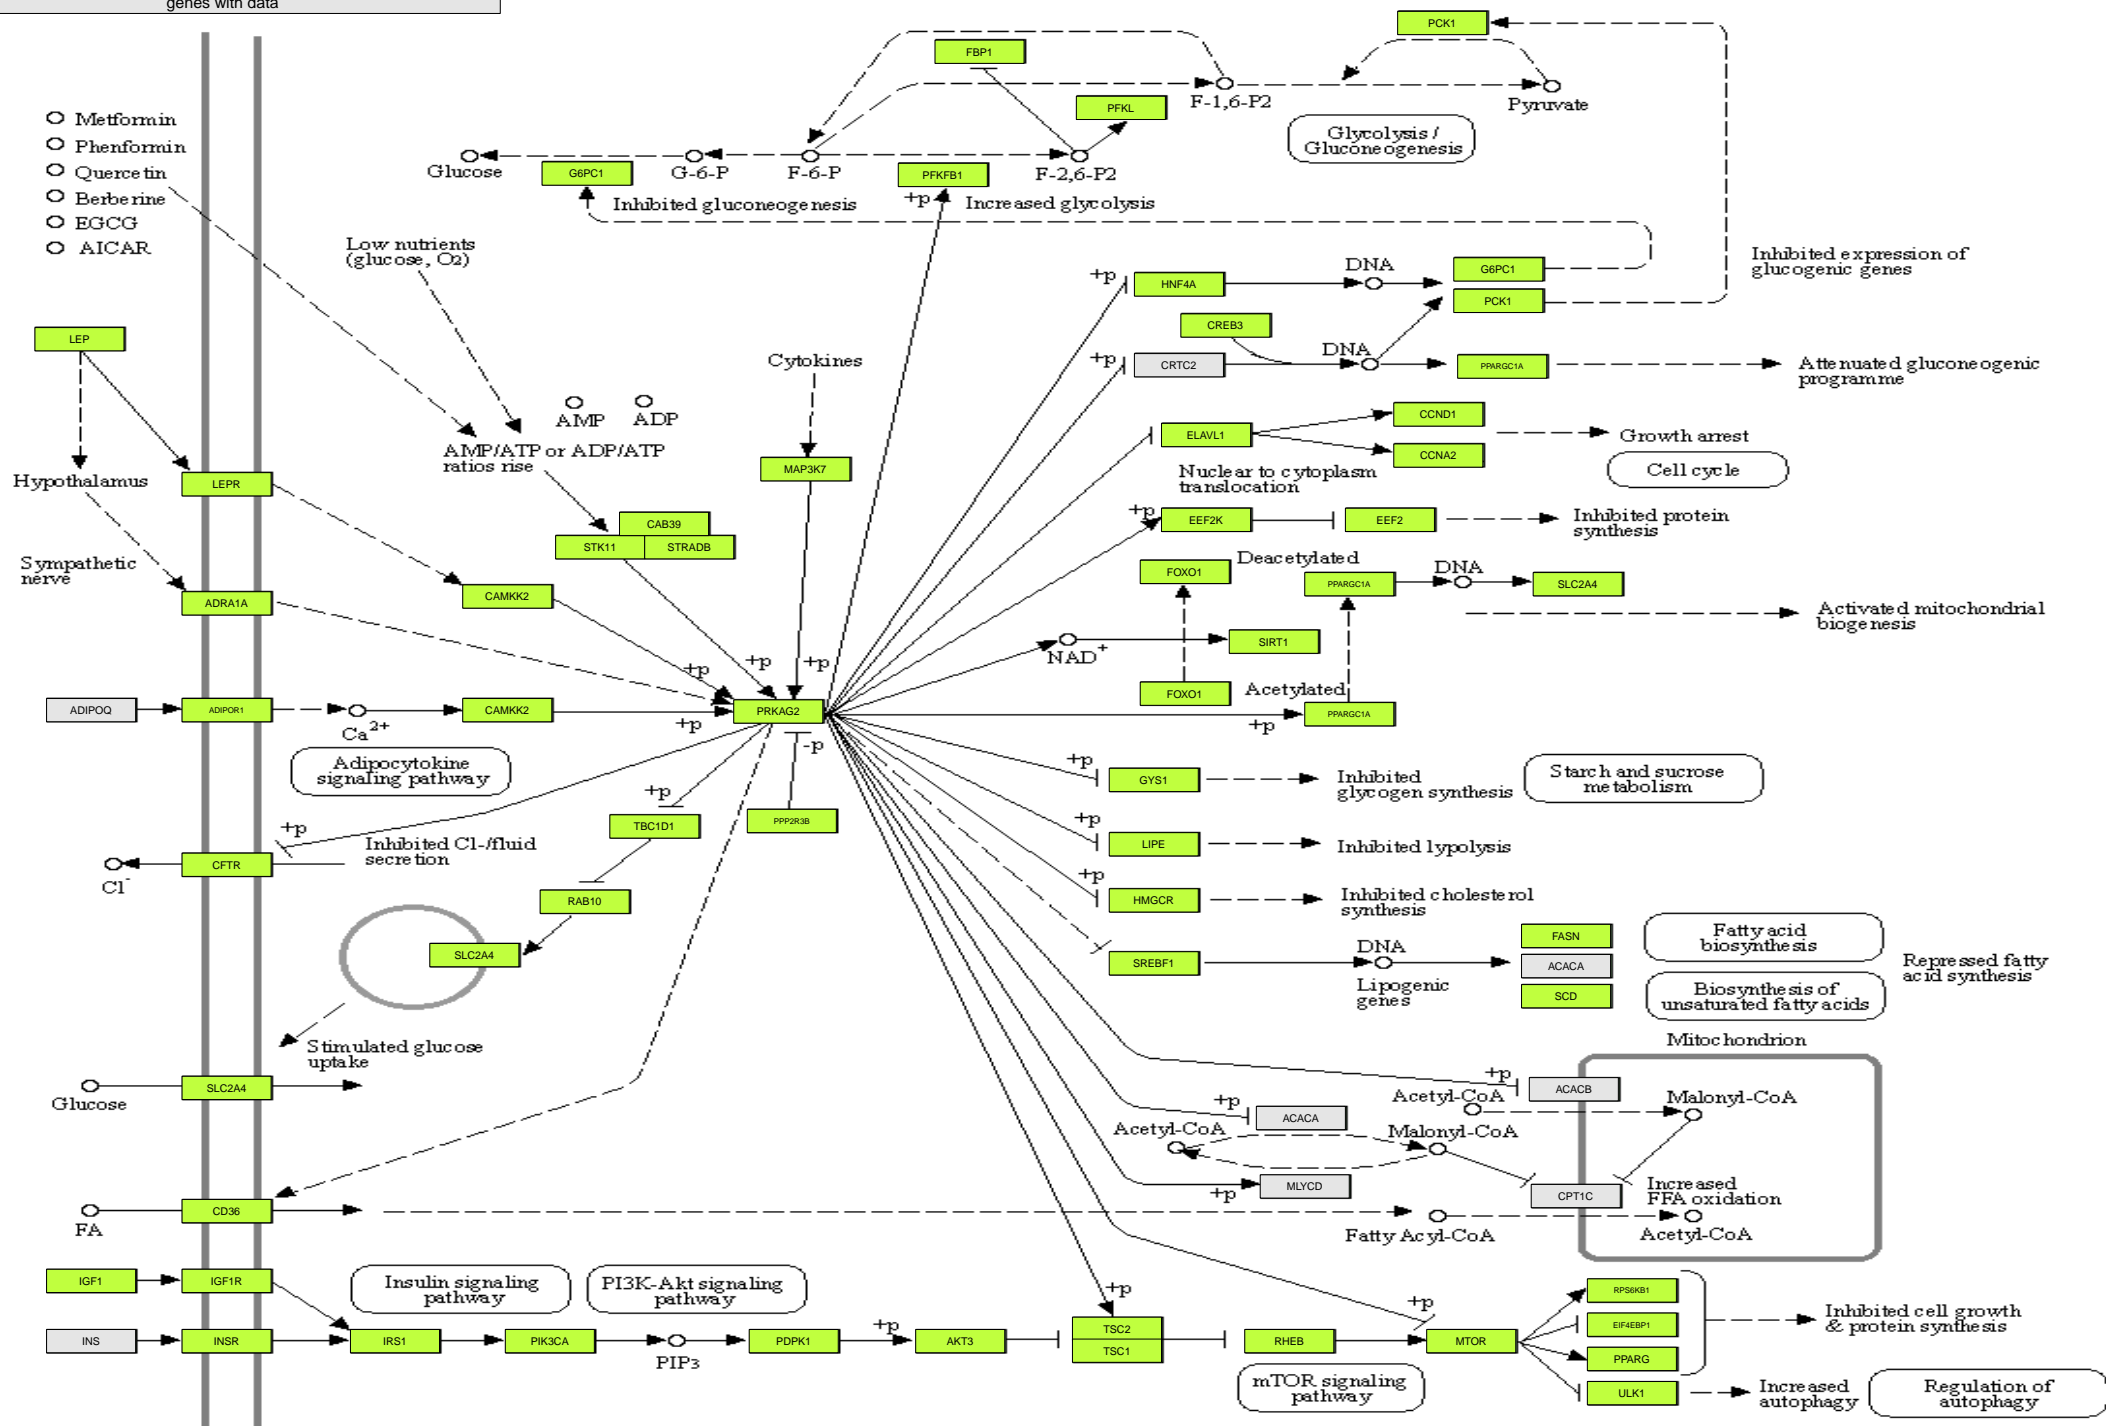

# AMPK\_signaling\_pathway sink nodes

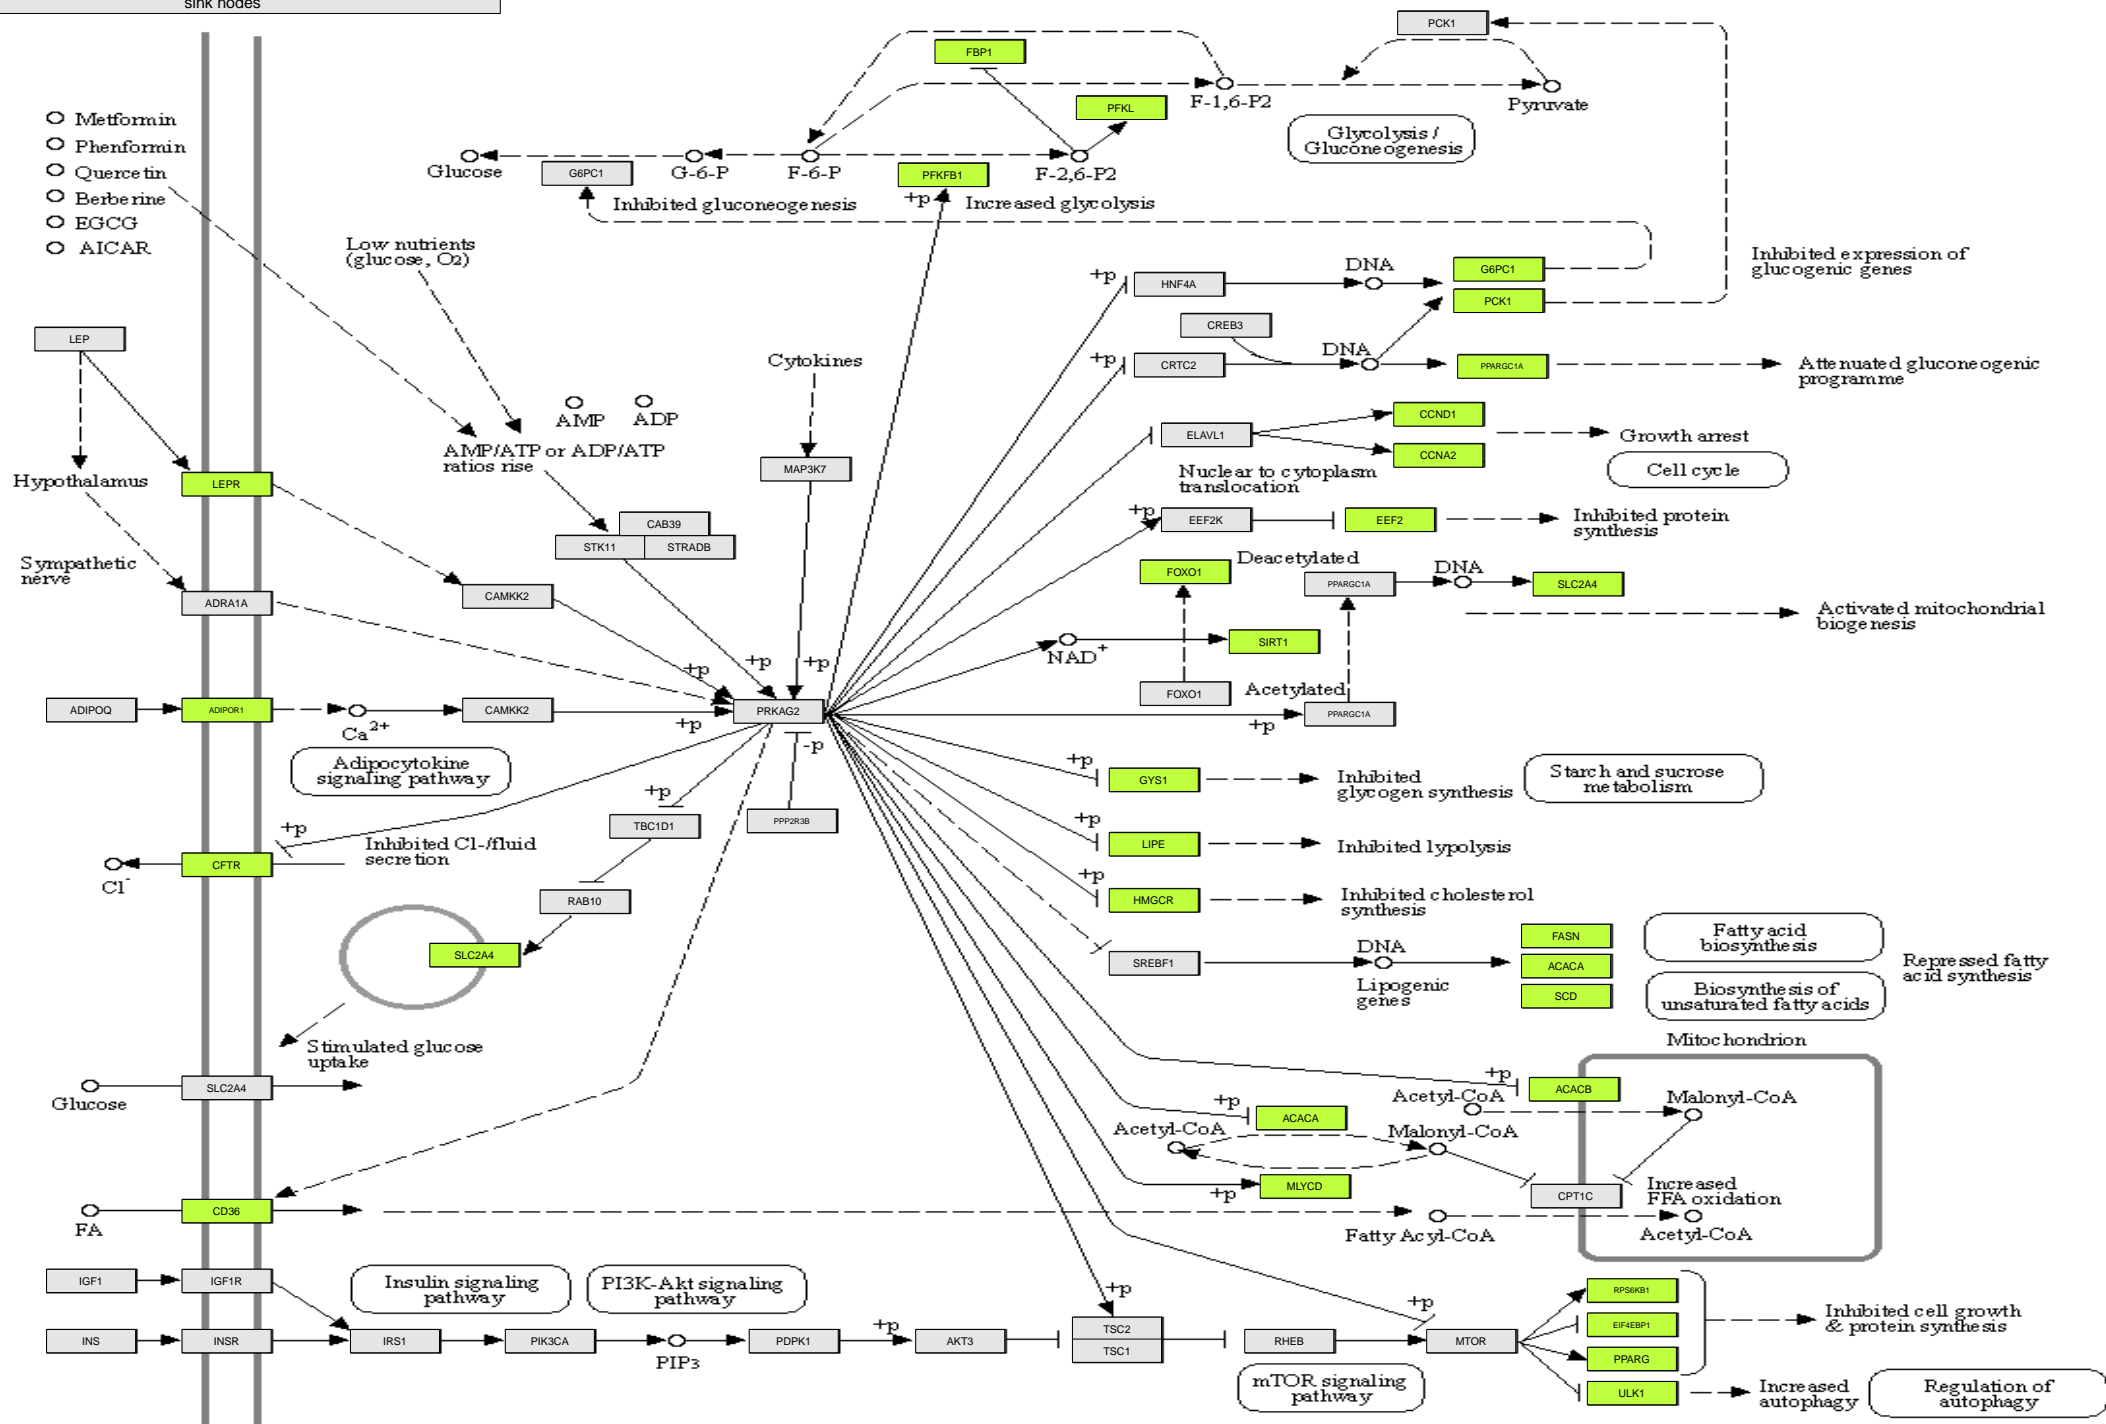

# AMPK signaling pathway Prenatal

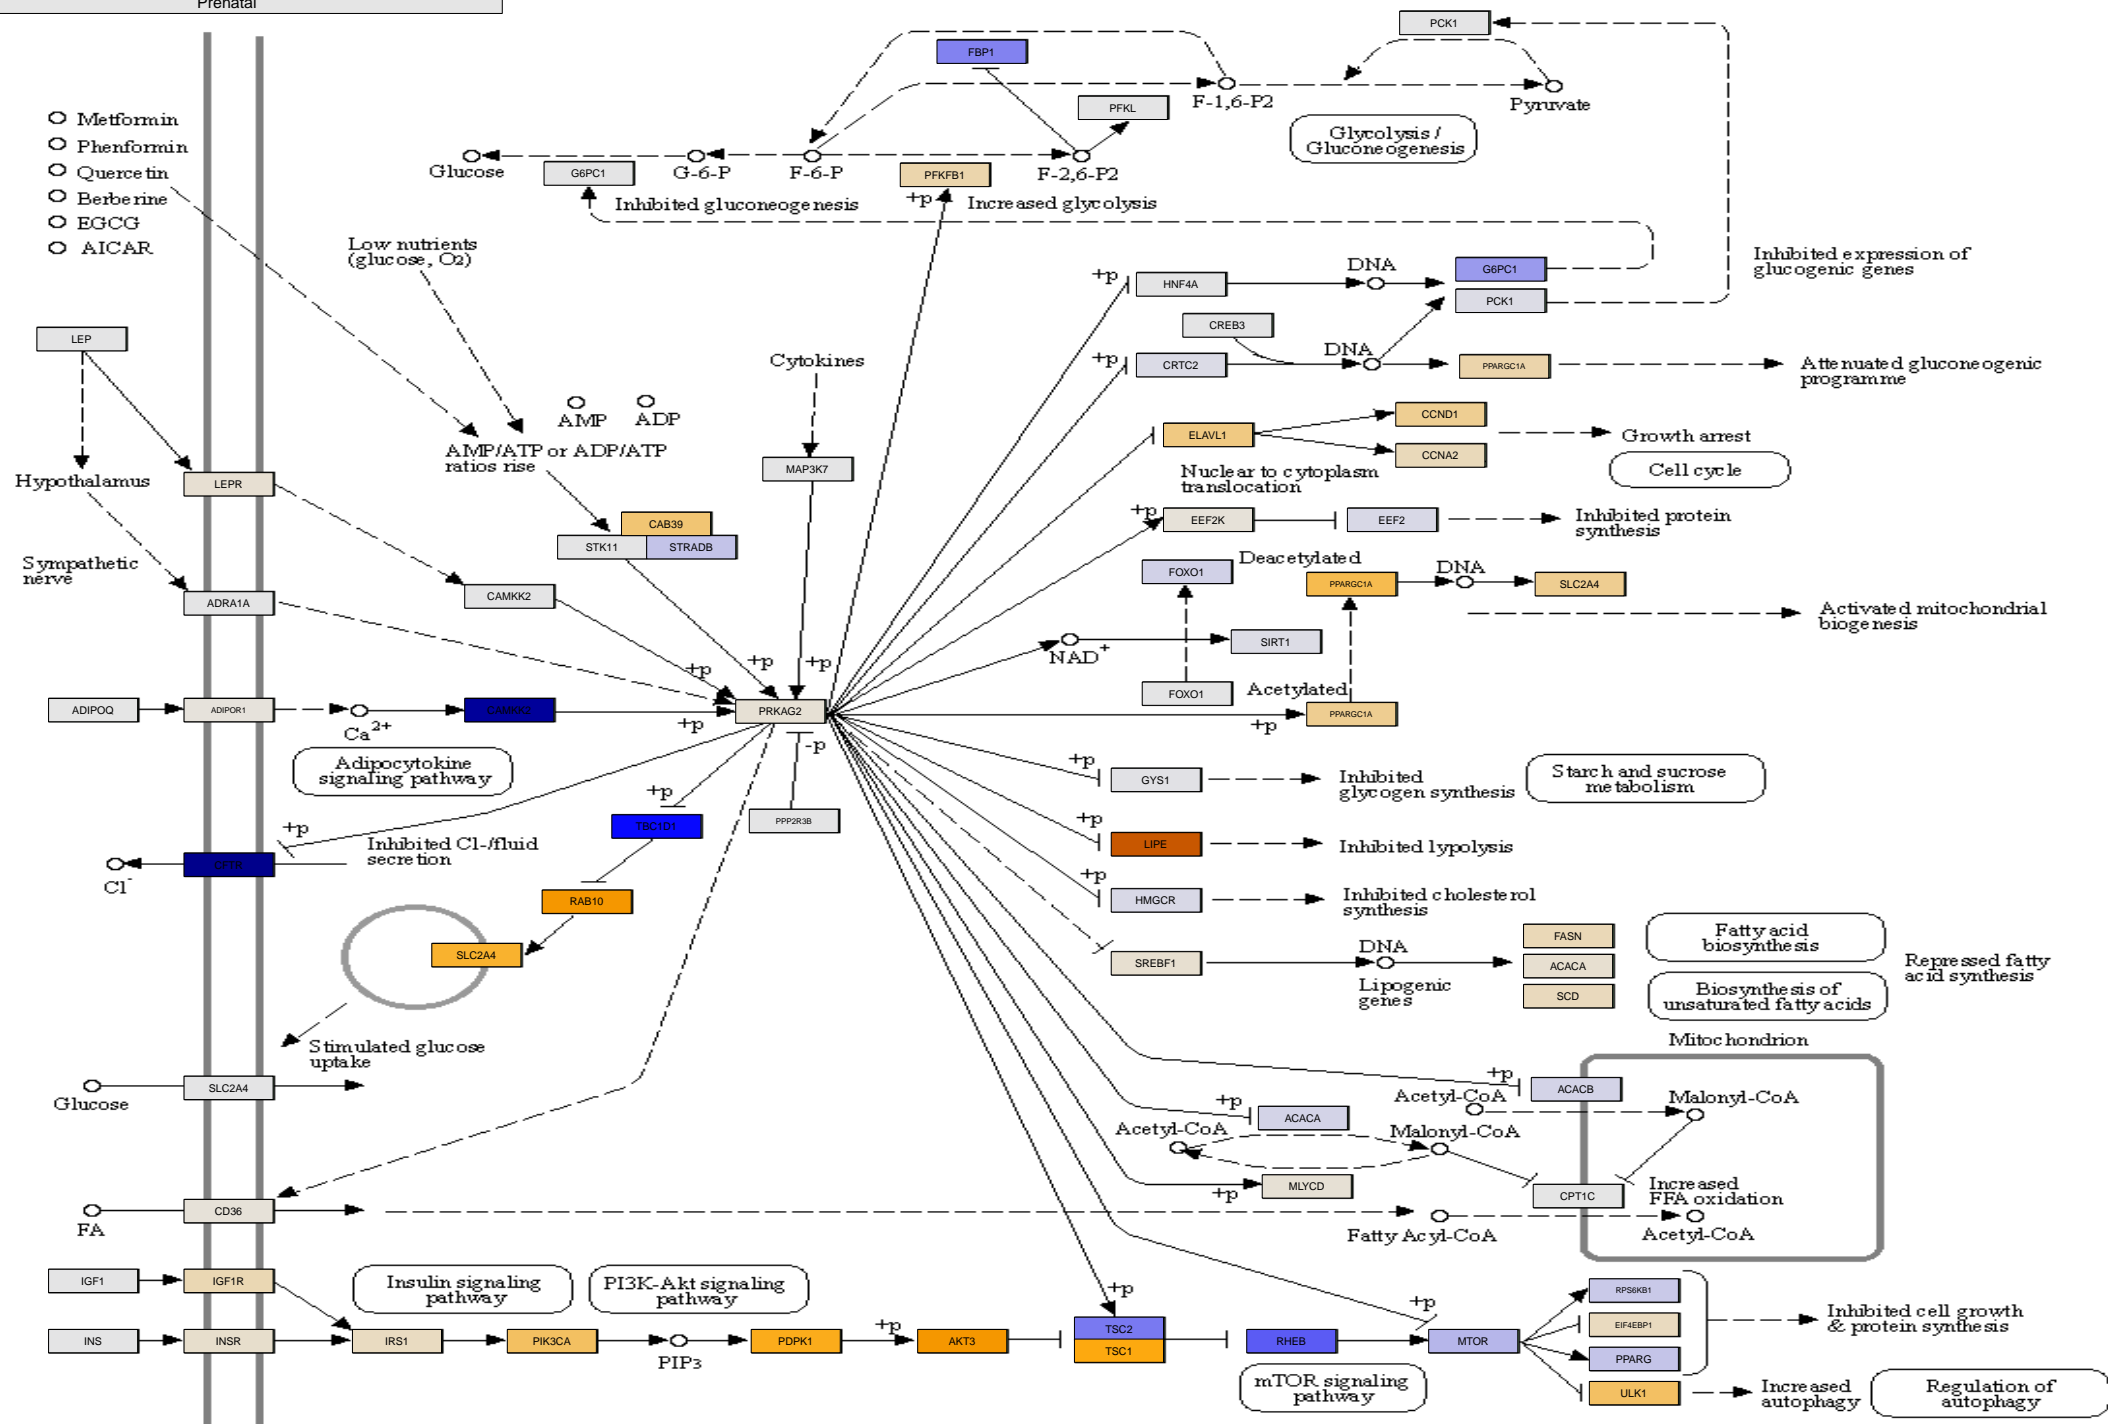

# AMPK\_signaling\_pathway Newborn

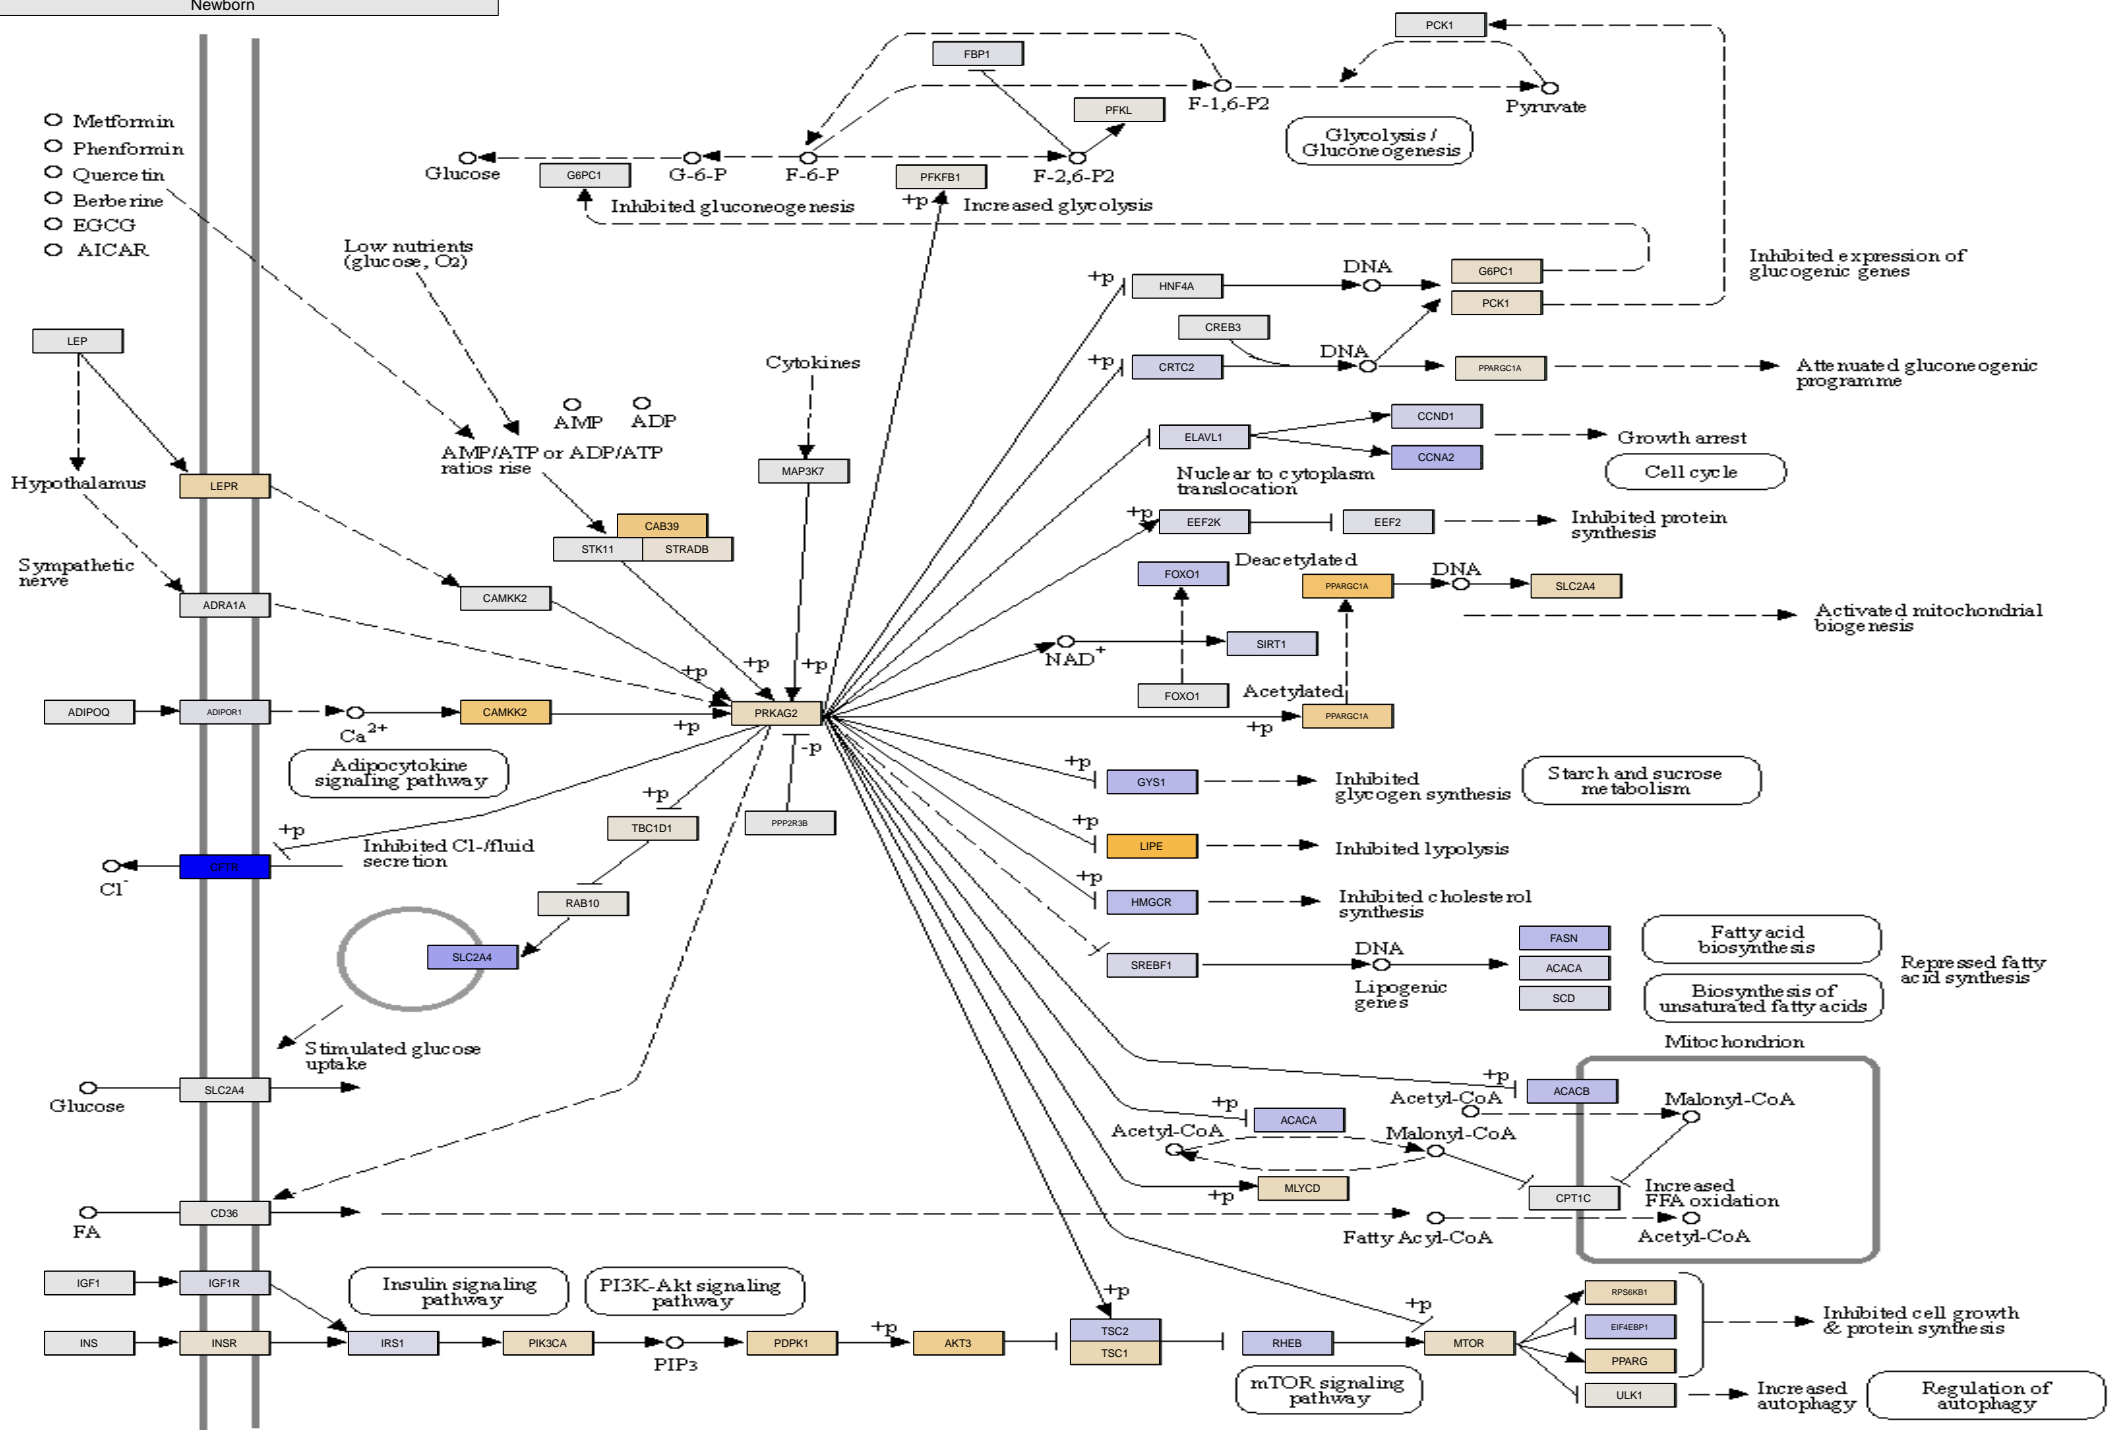

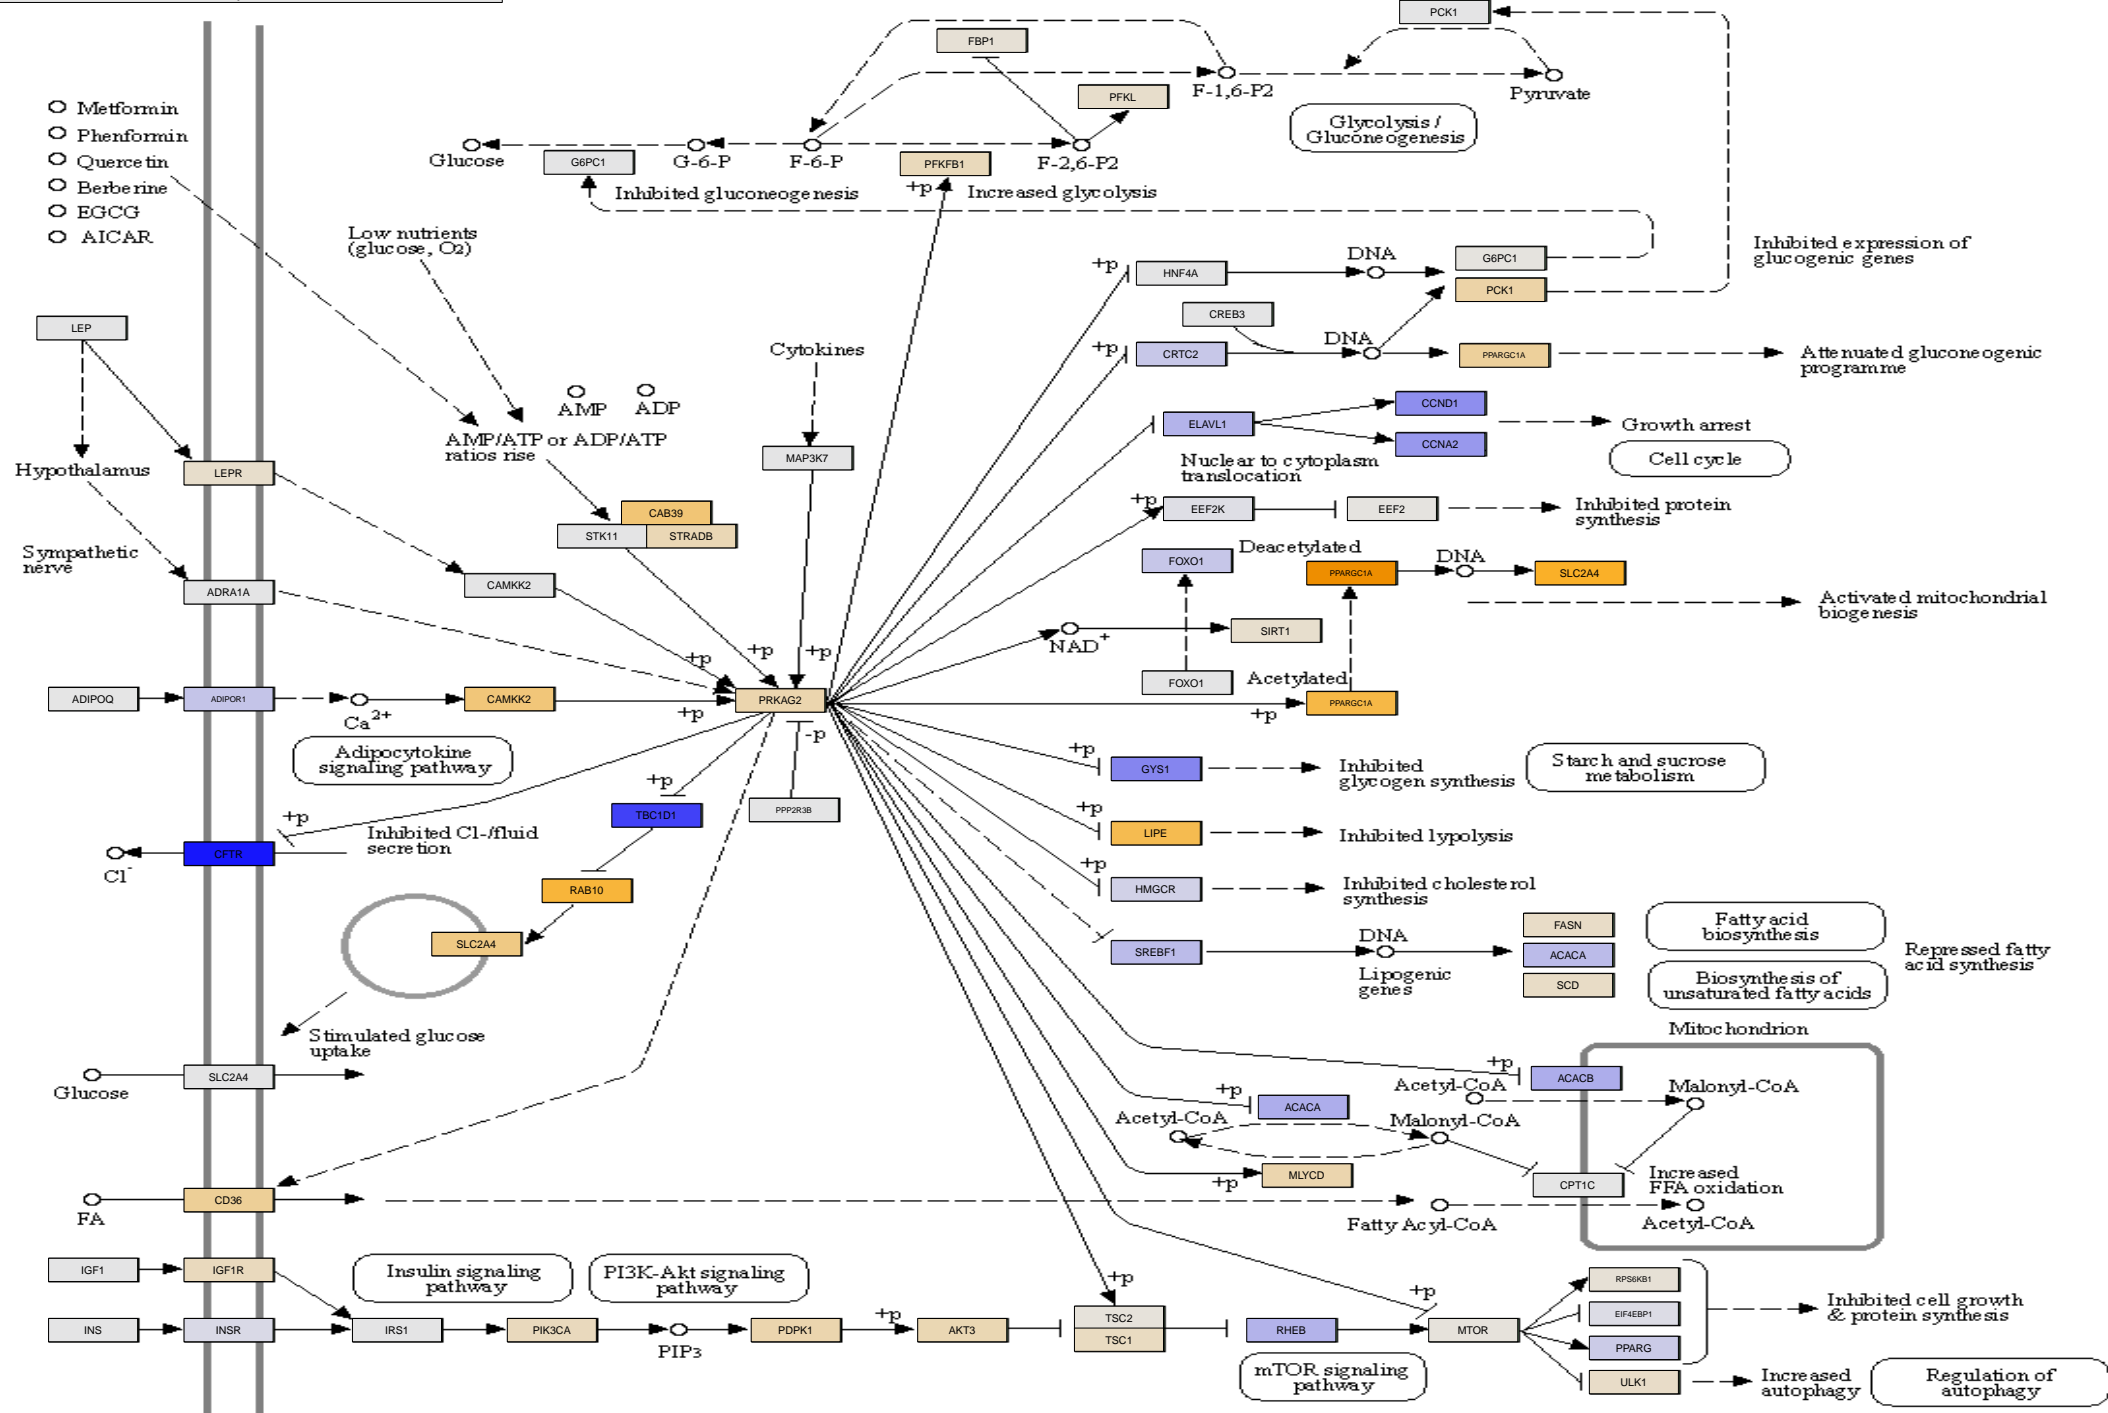

# AMPK signaling pathway Infant

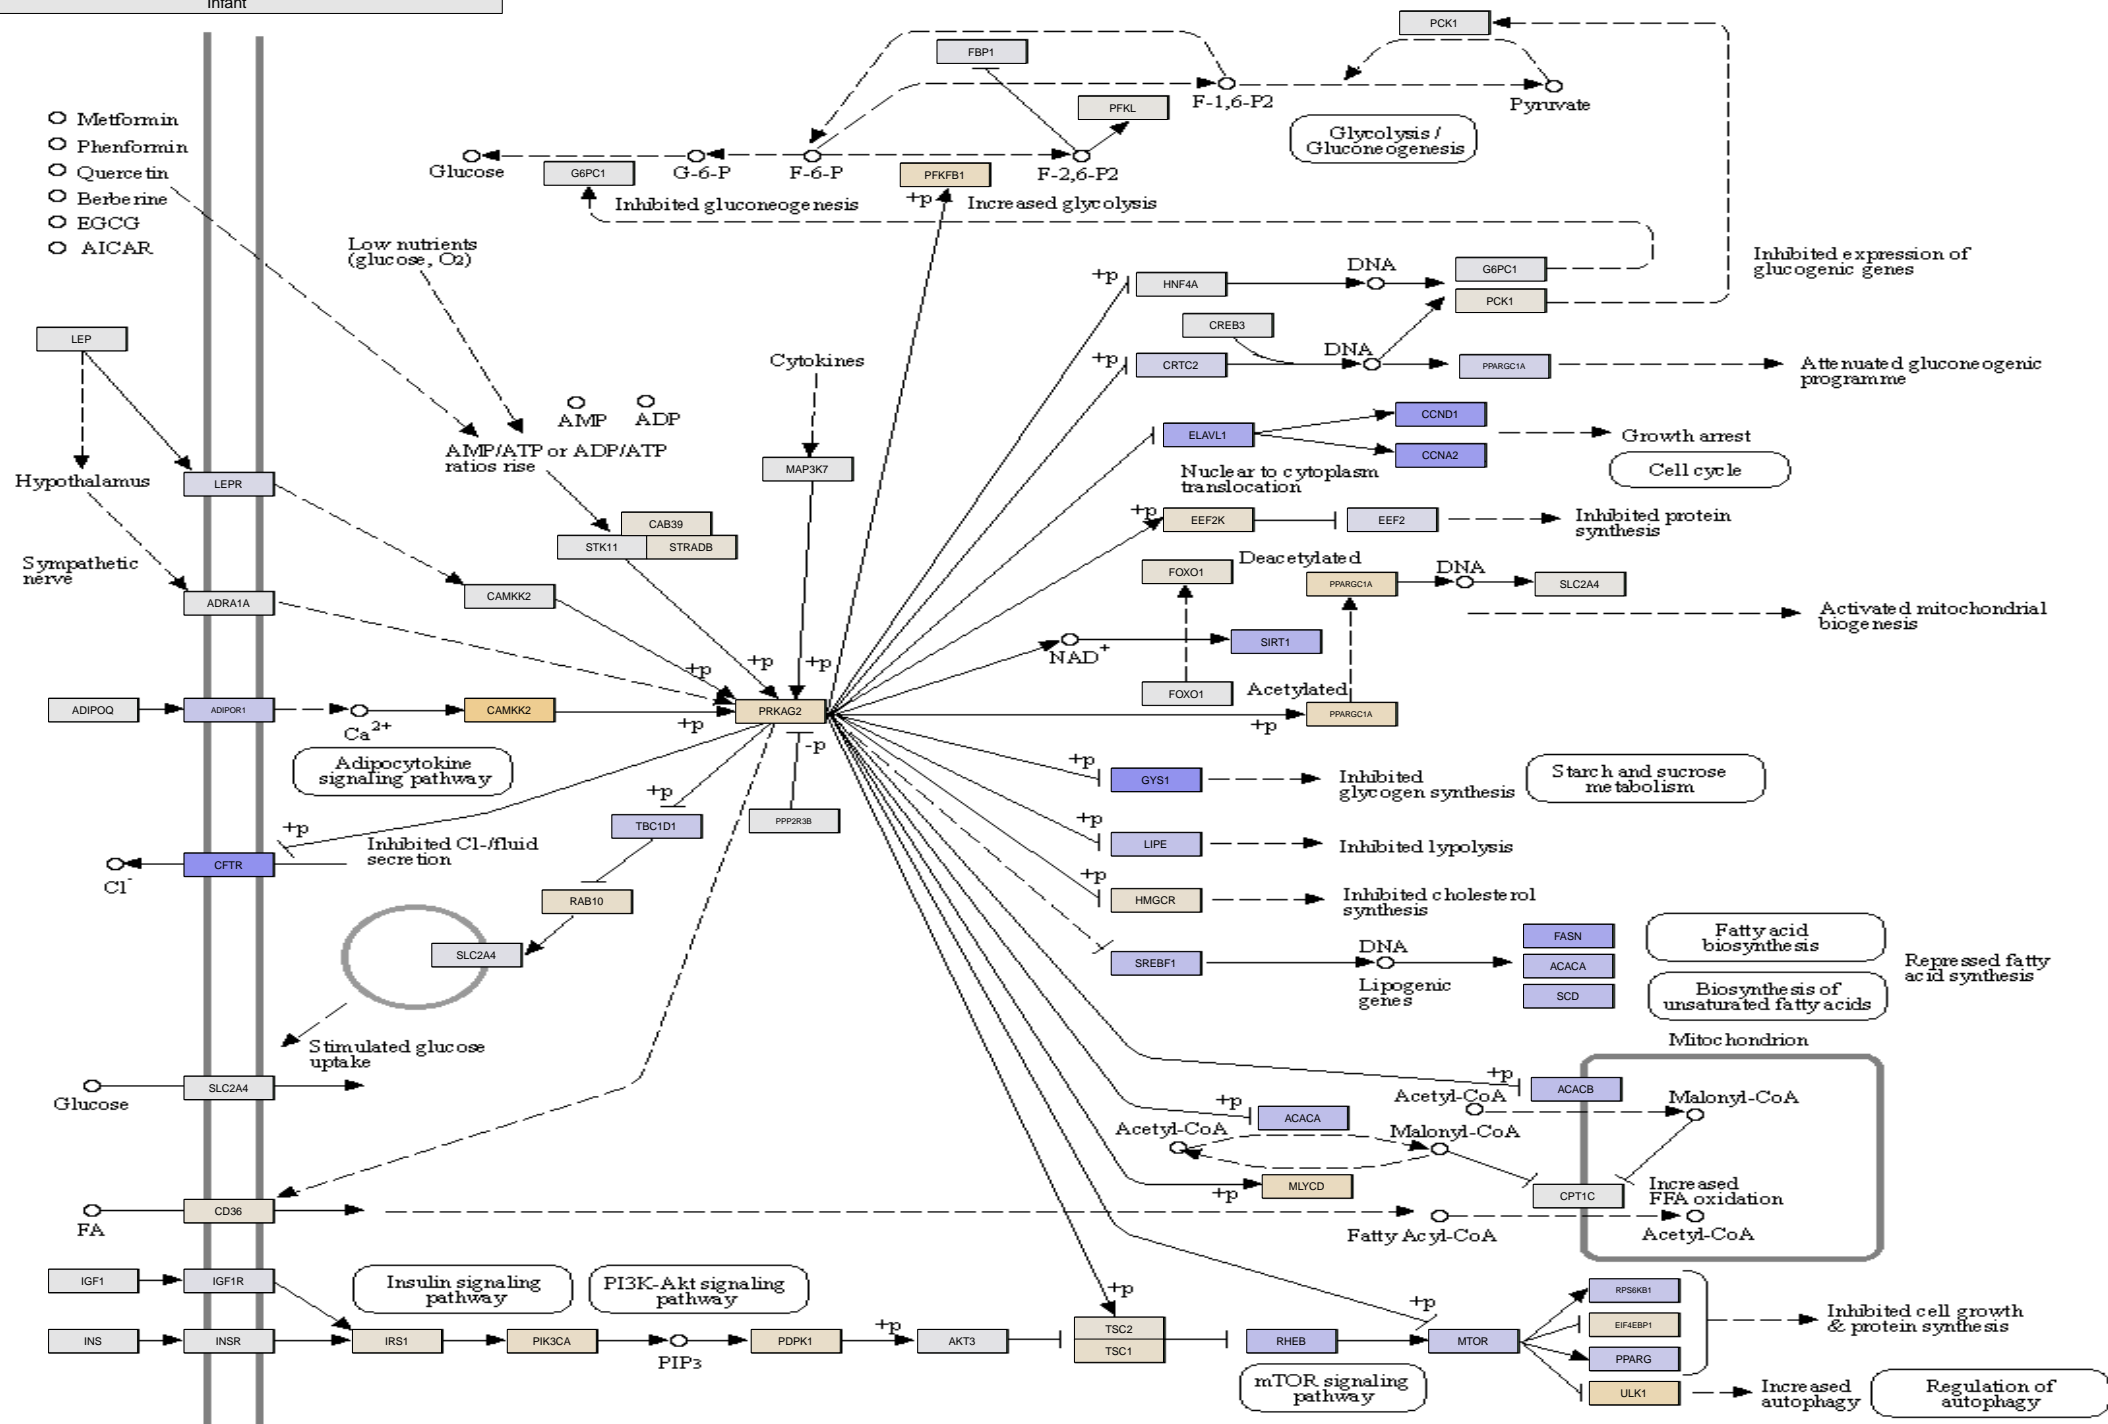

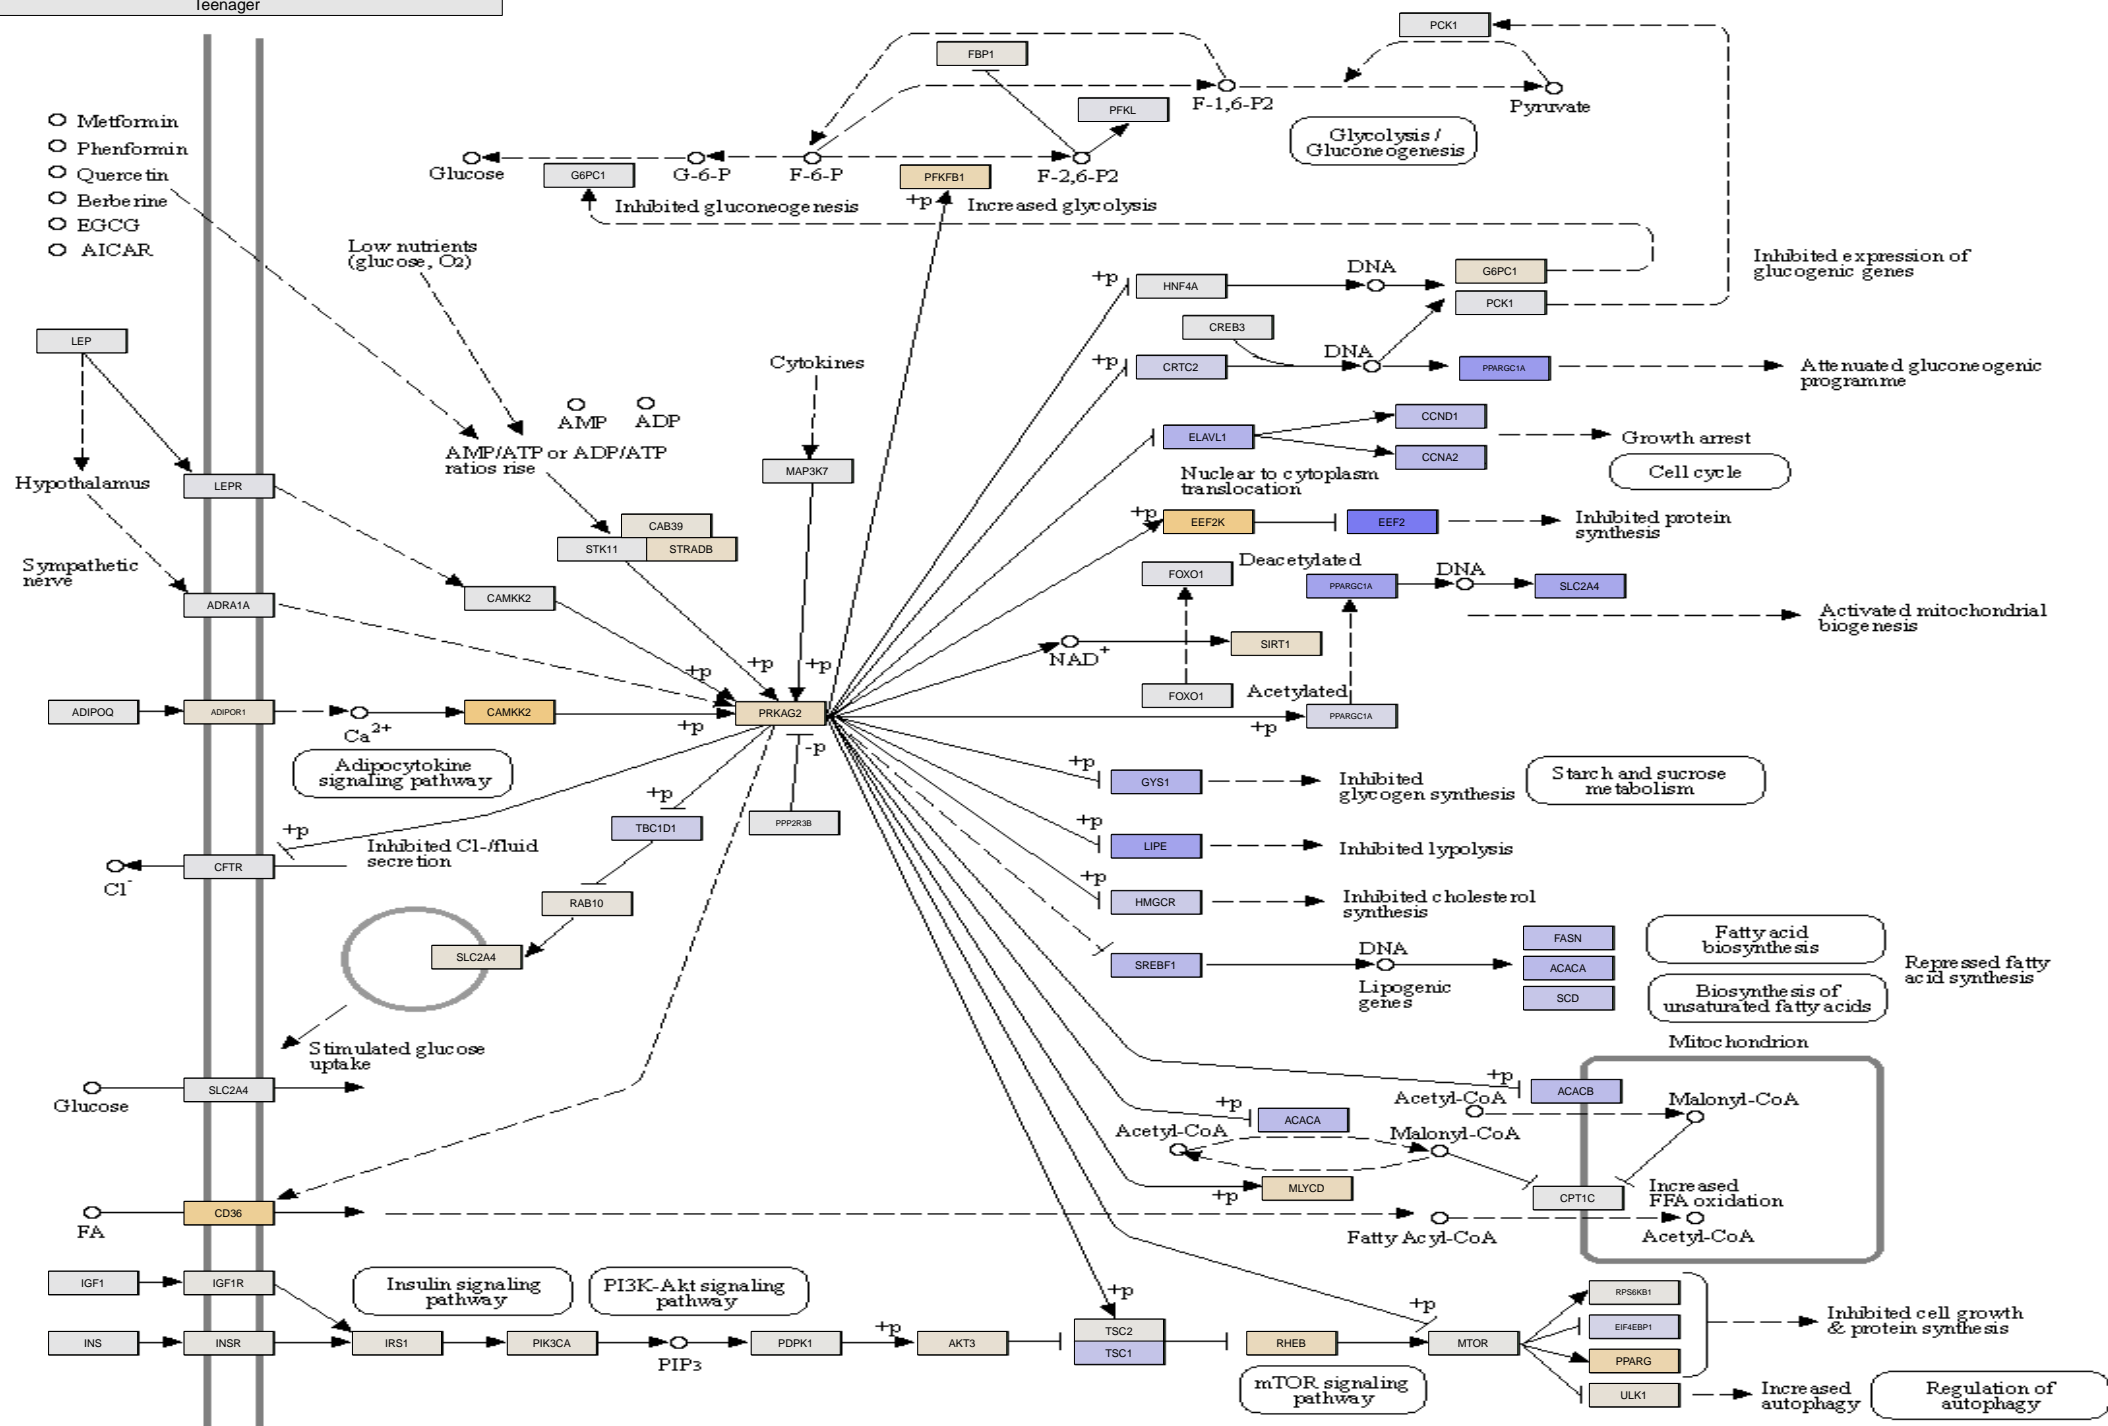



# AMPK\_signaling\_pathway Adult

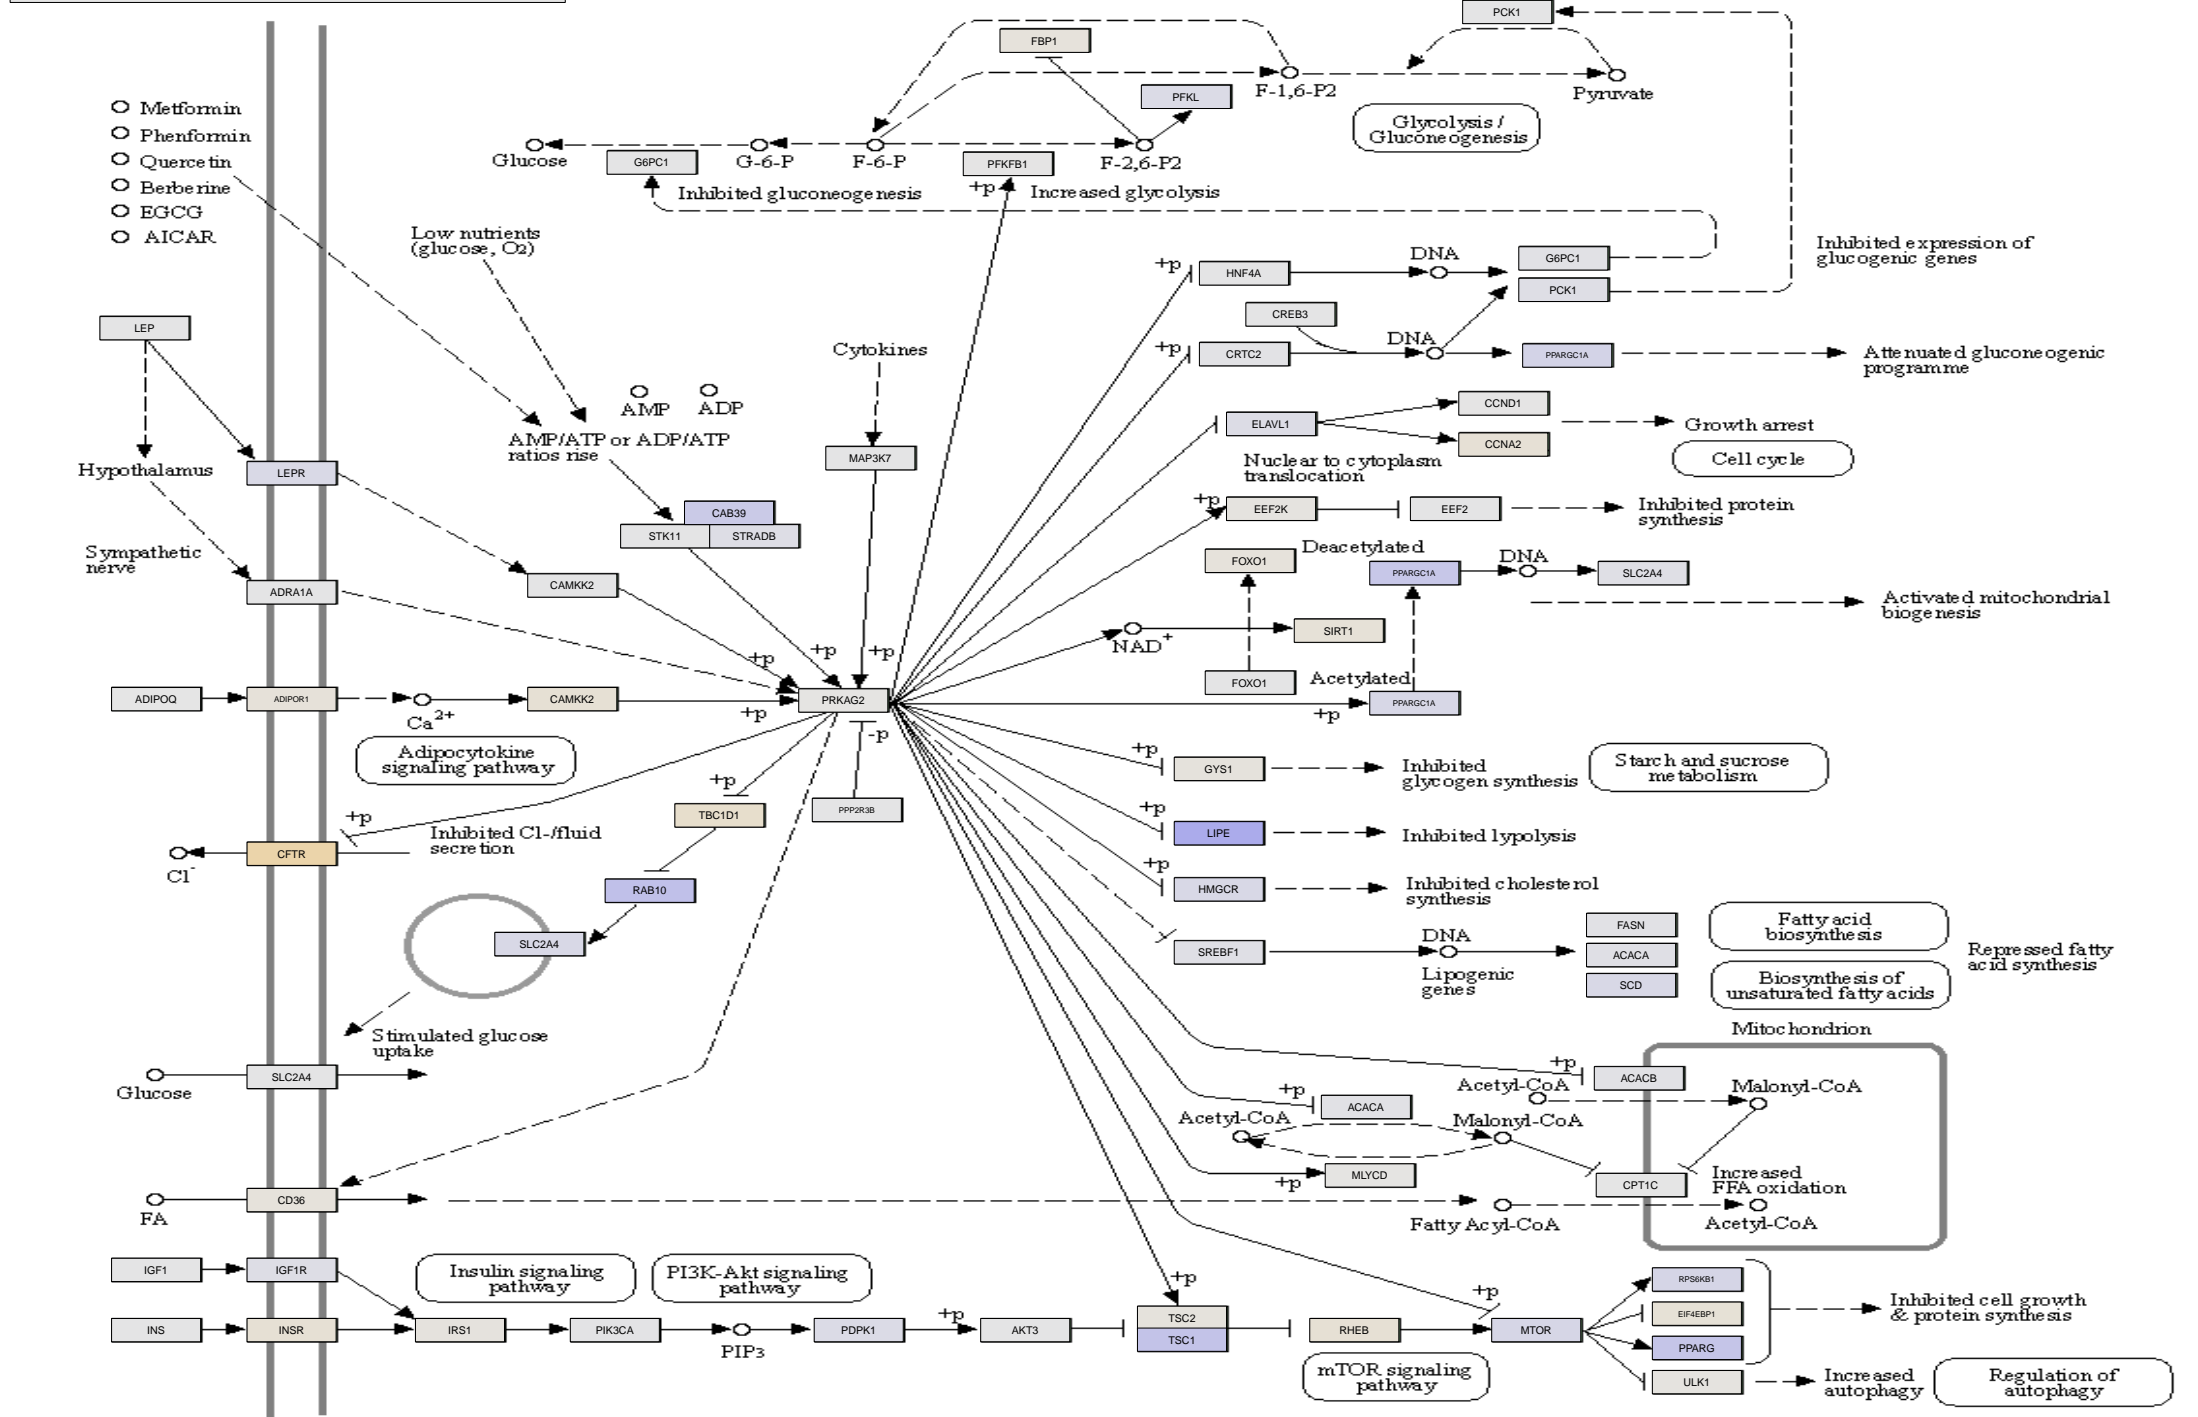

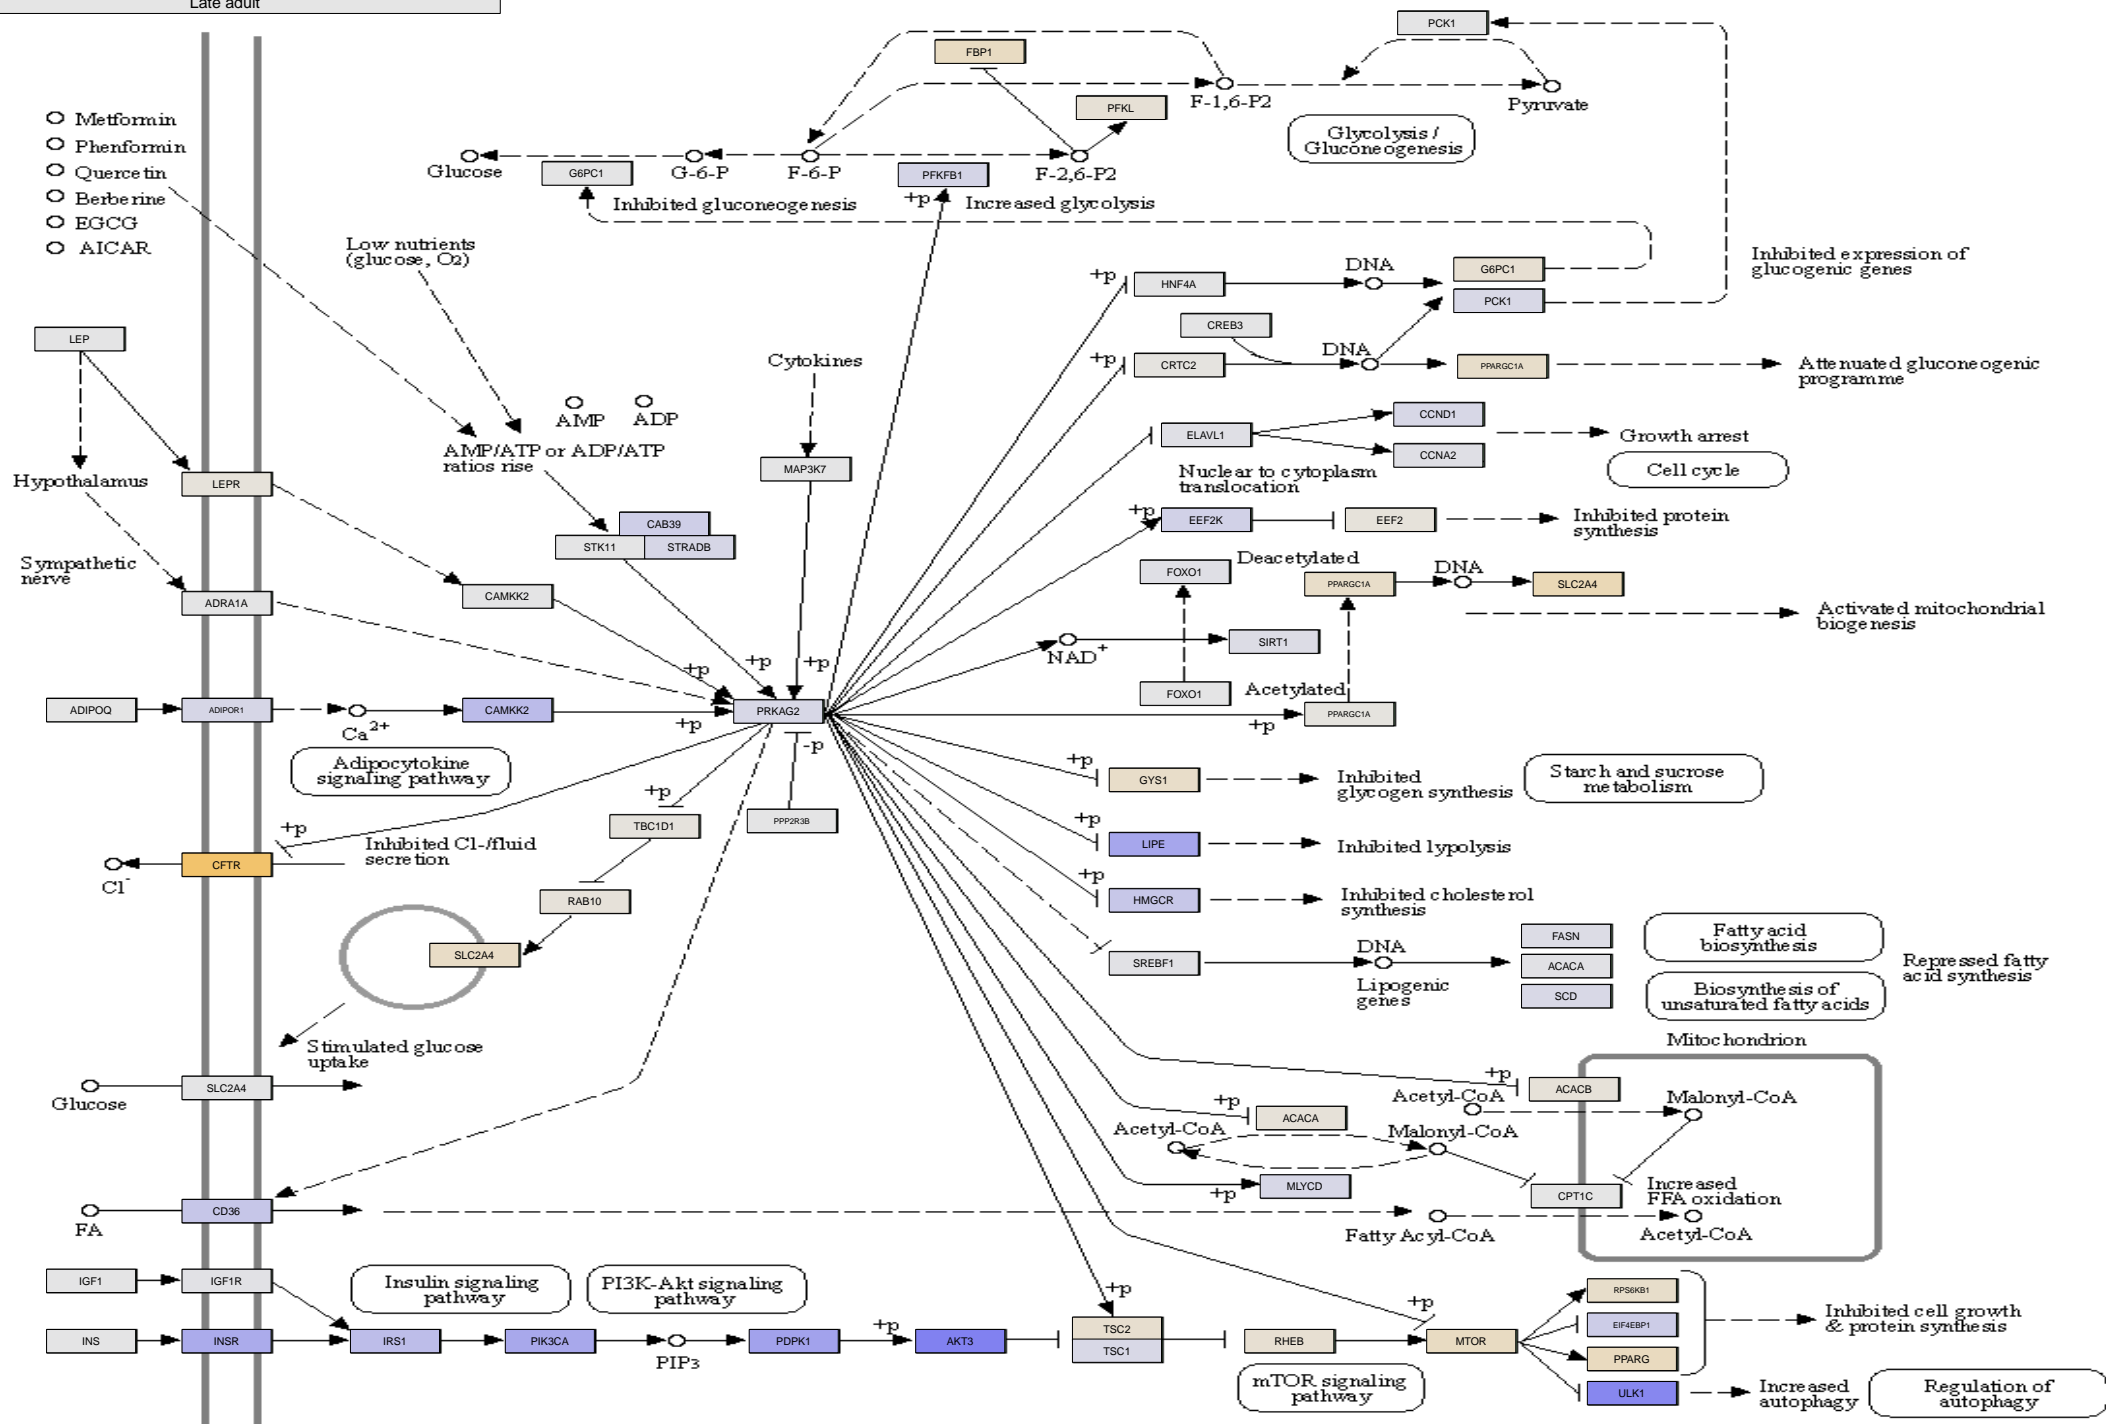

Supplement: s1 [file s1]
