# Supplementary material for: The Transcriptome and Methylome of the Developing and Aging Brain and Their Relations to Gliomas and Psychological Disorders
Source: MDPI journal article supplement (doi:10.3390/cells11030362), 2022-01-21

VEGF signaling pathway

all genes

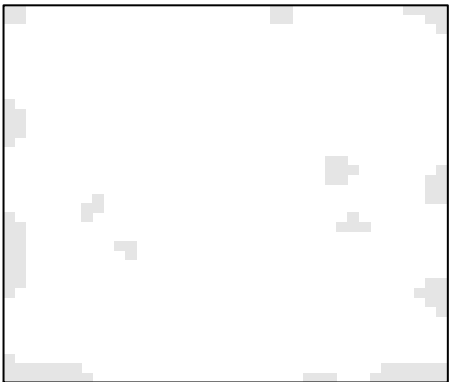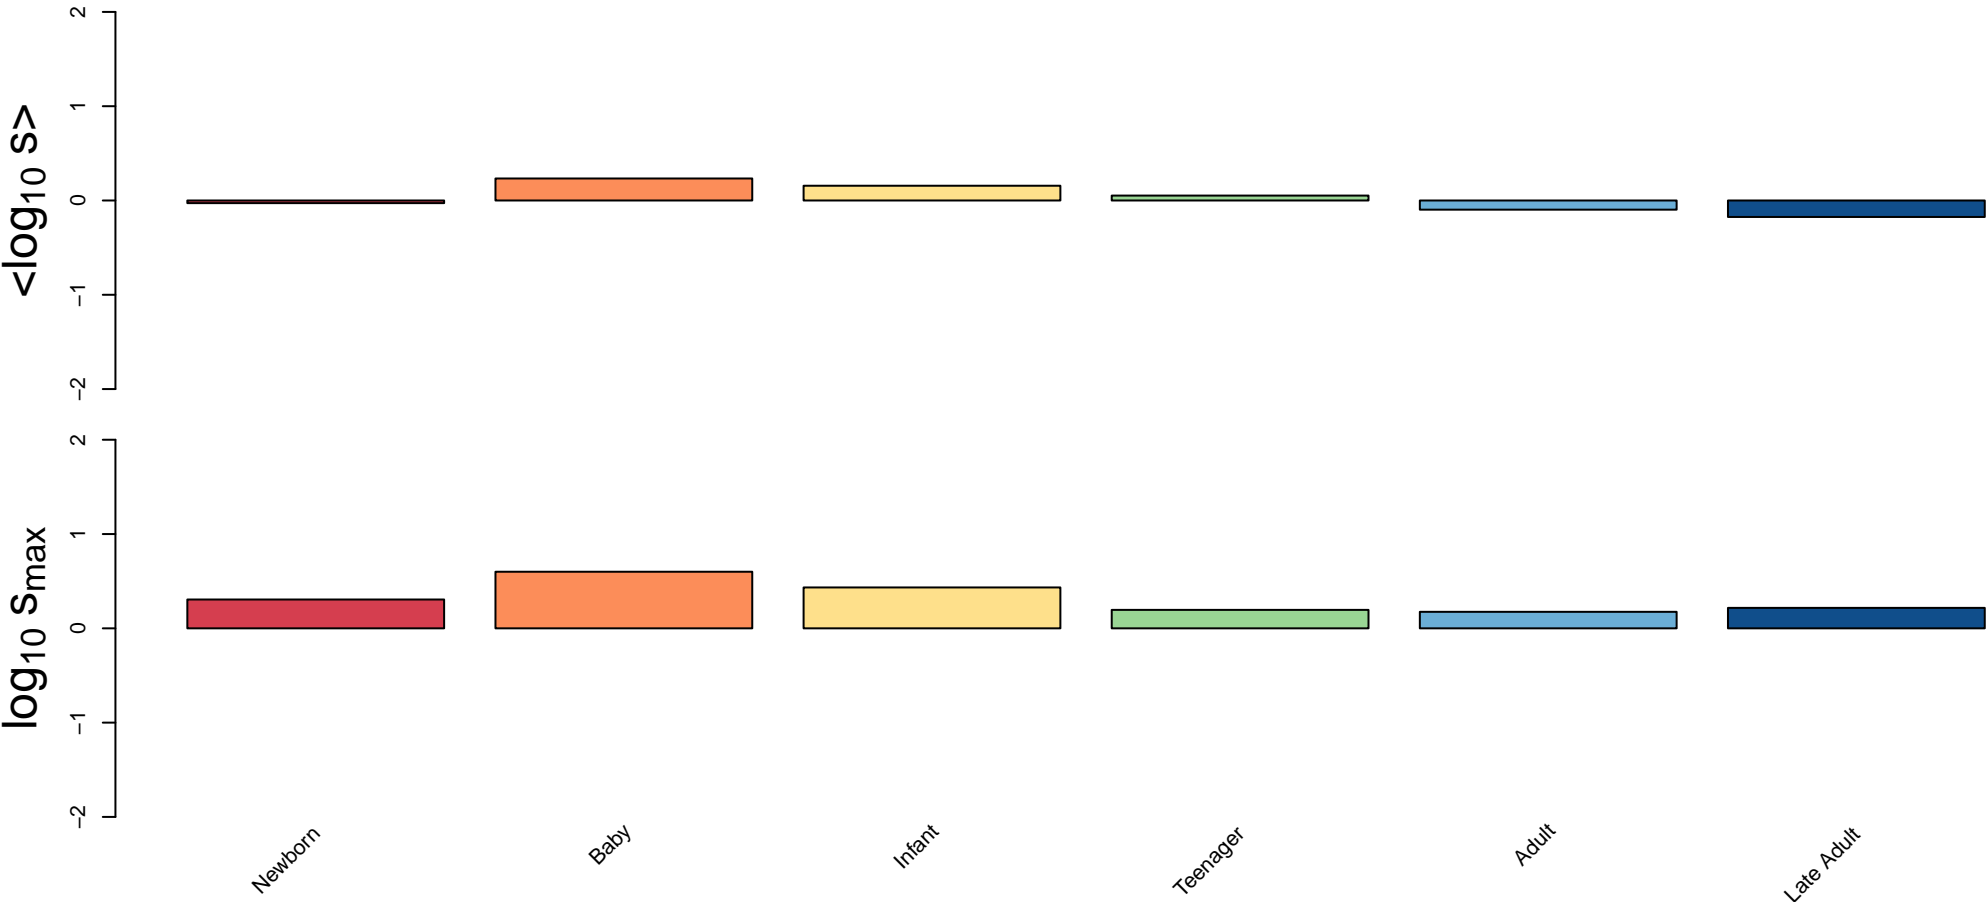

VEGF\_signaling\_pathway  
genes with data

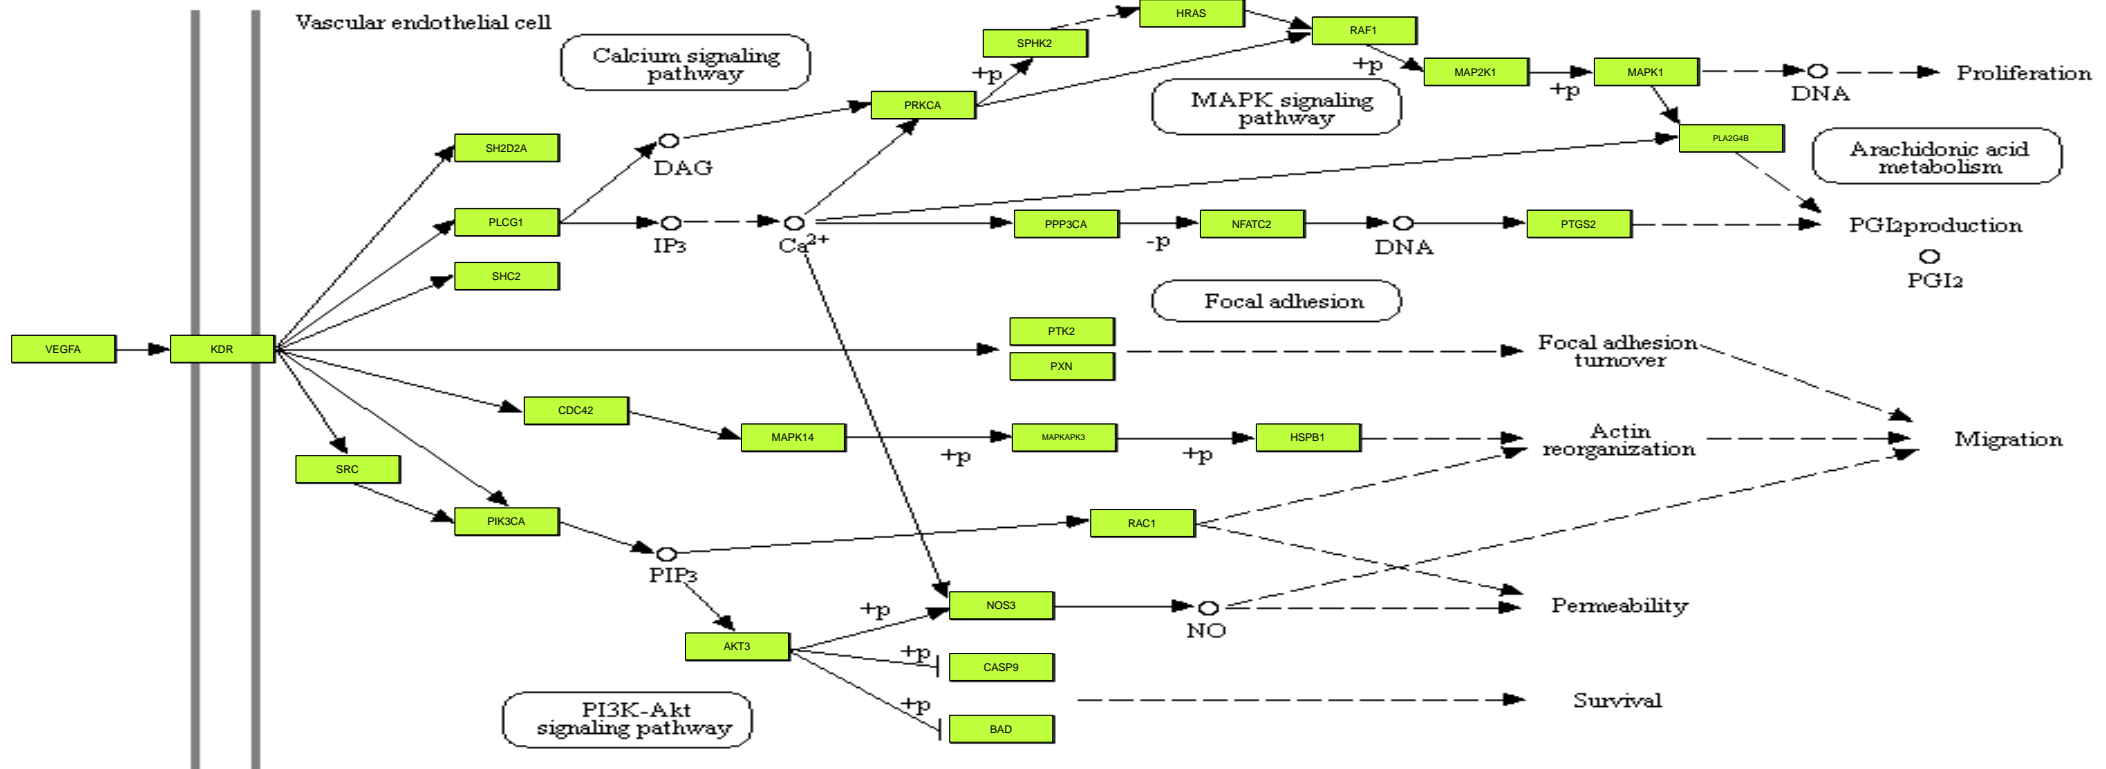

VEGF\_signaling\_pathway  
sink nodes

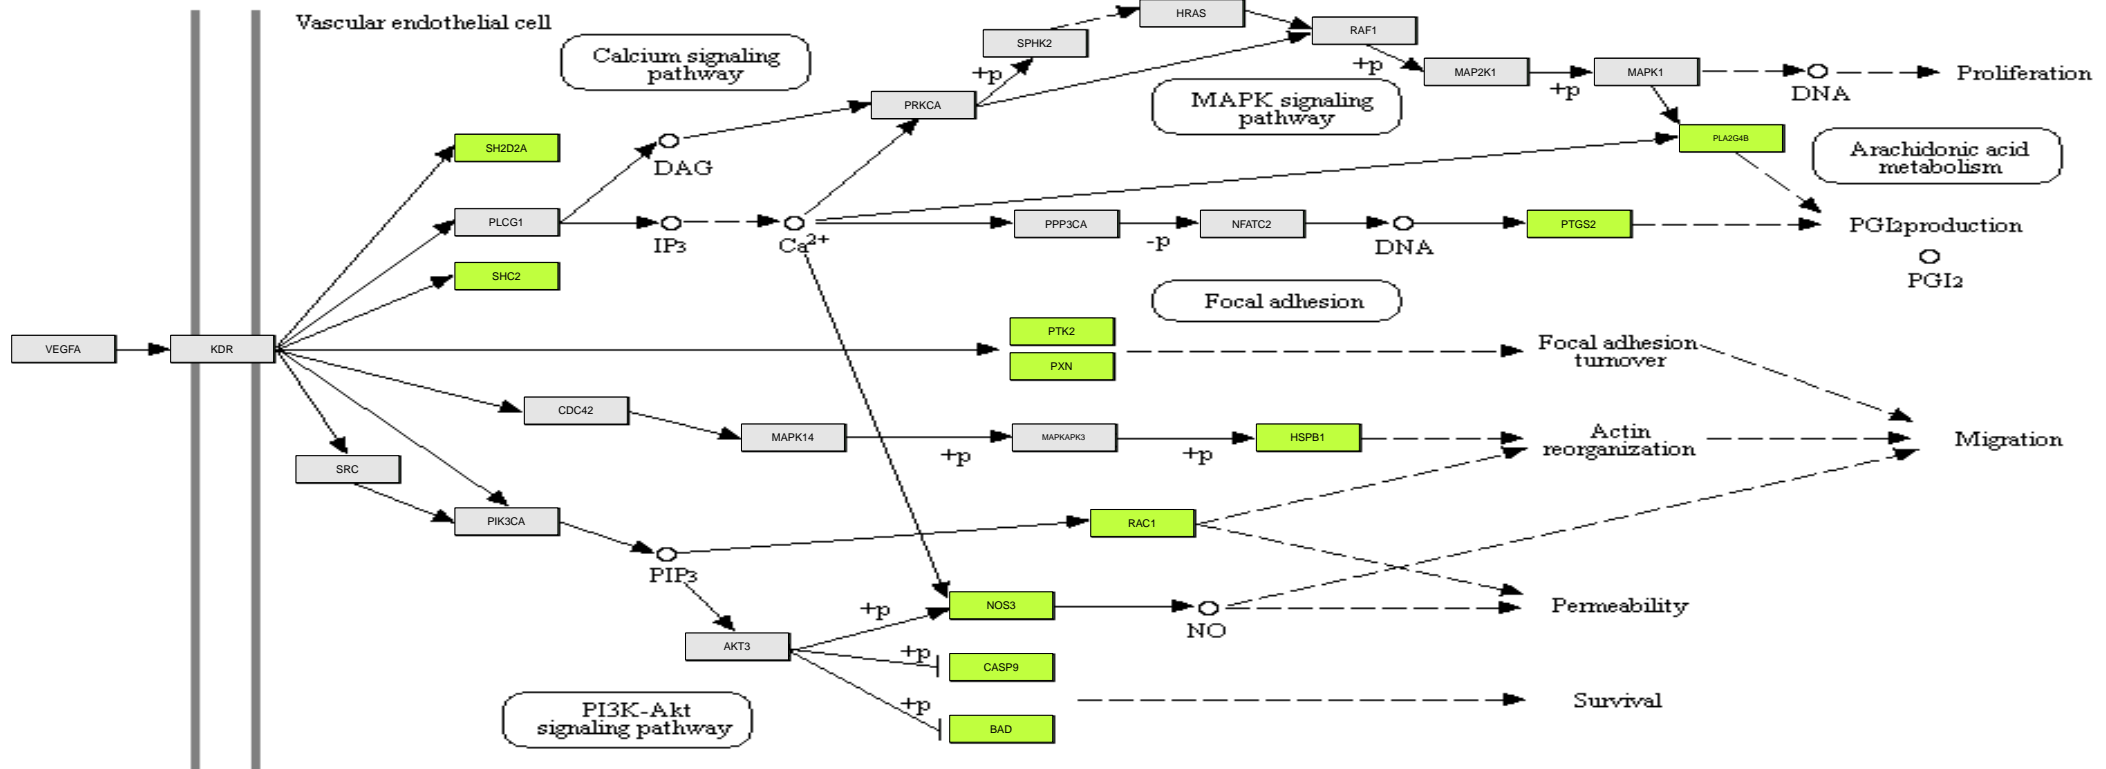

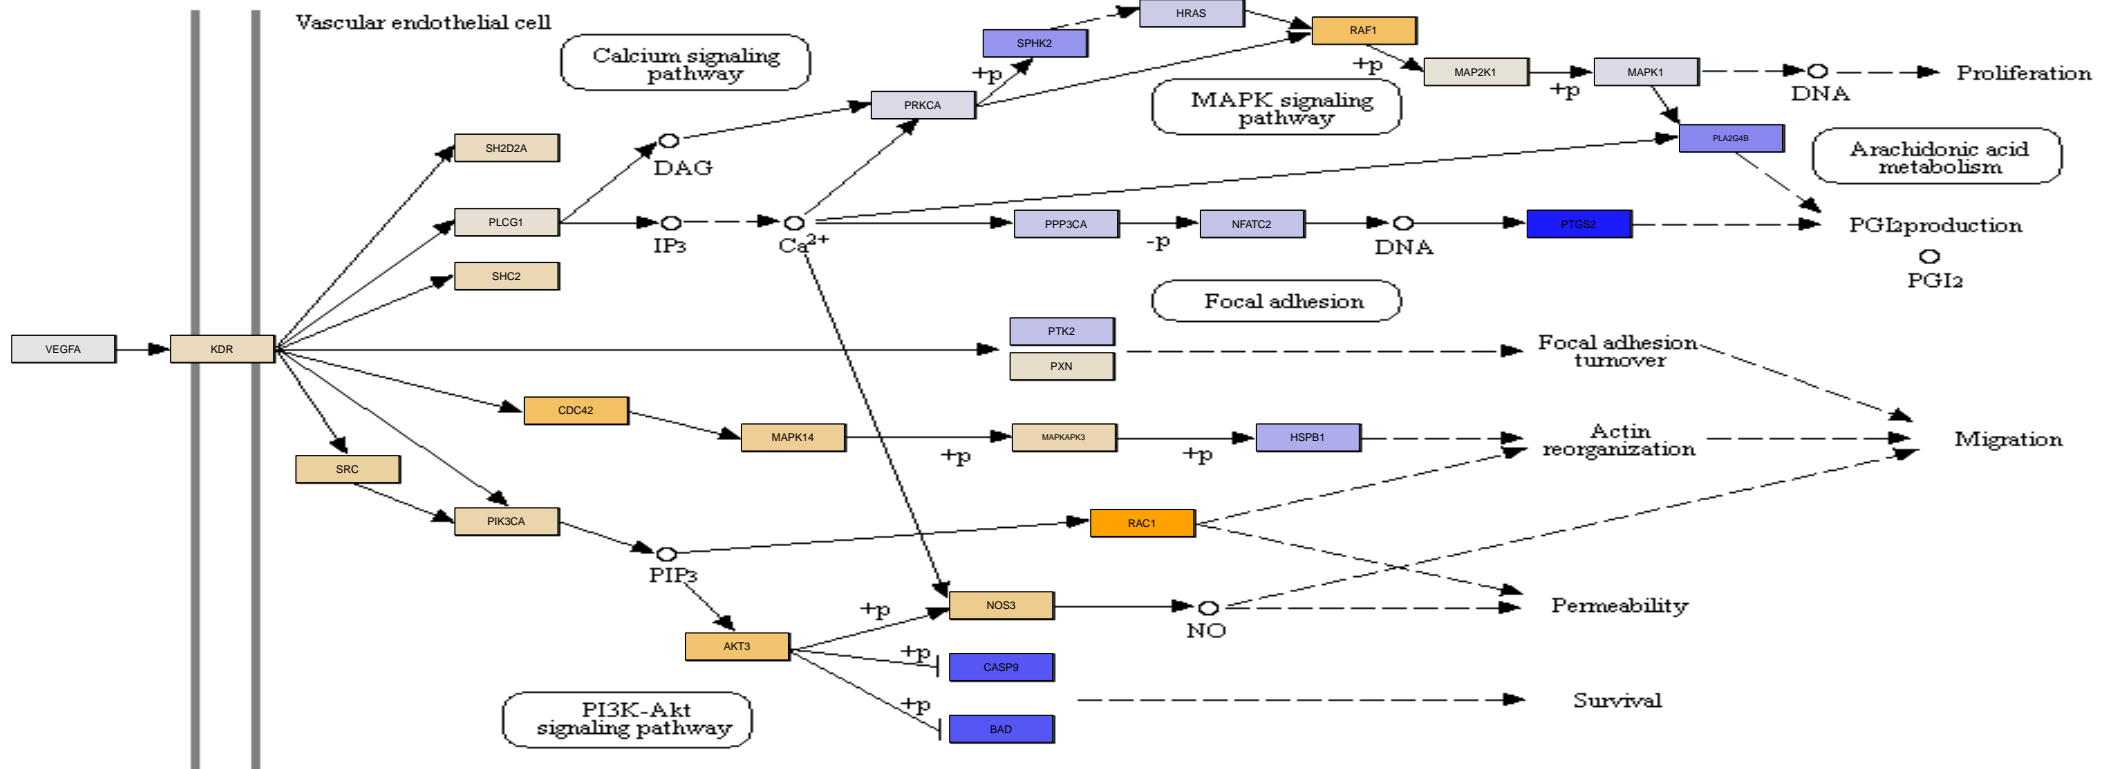

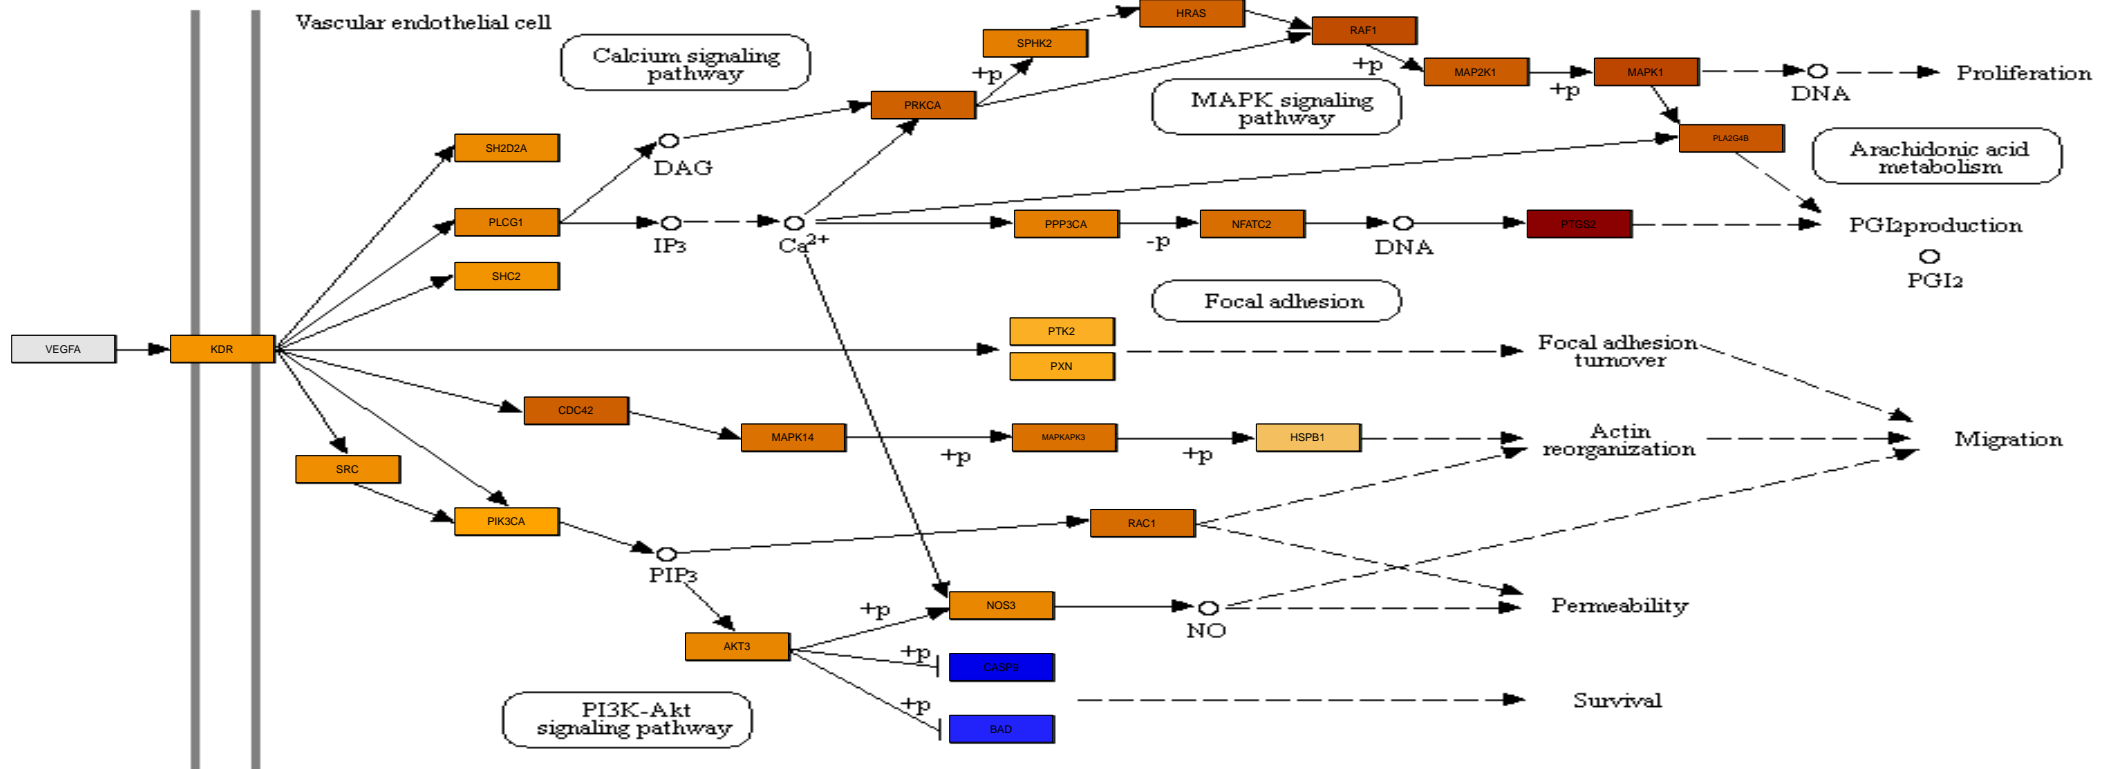

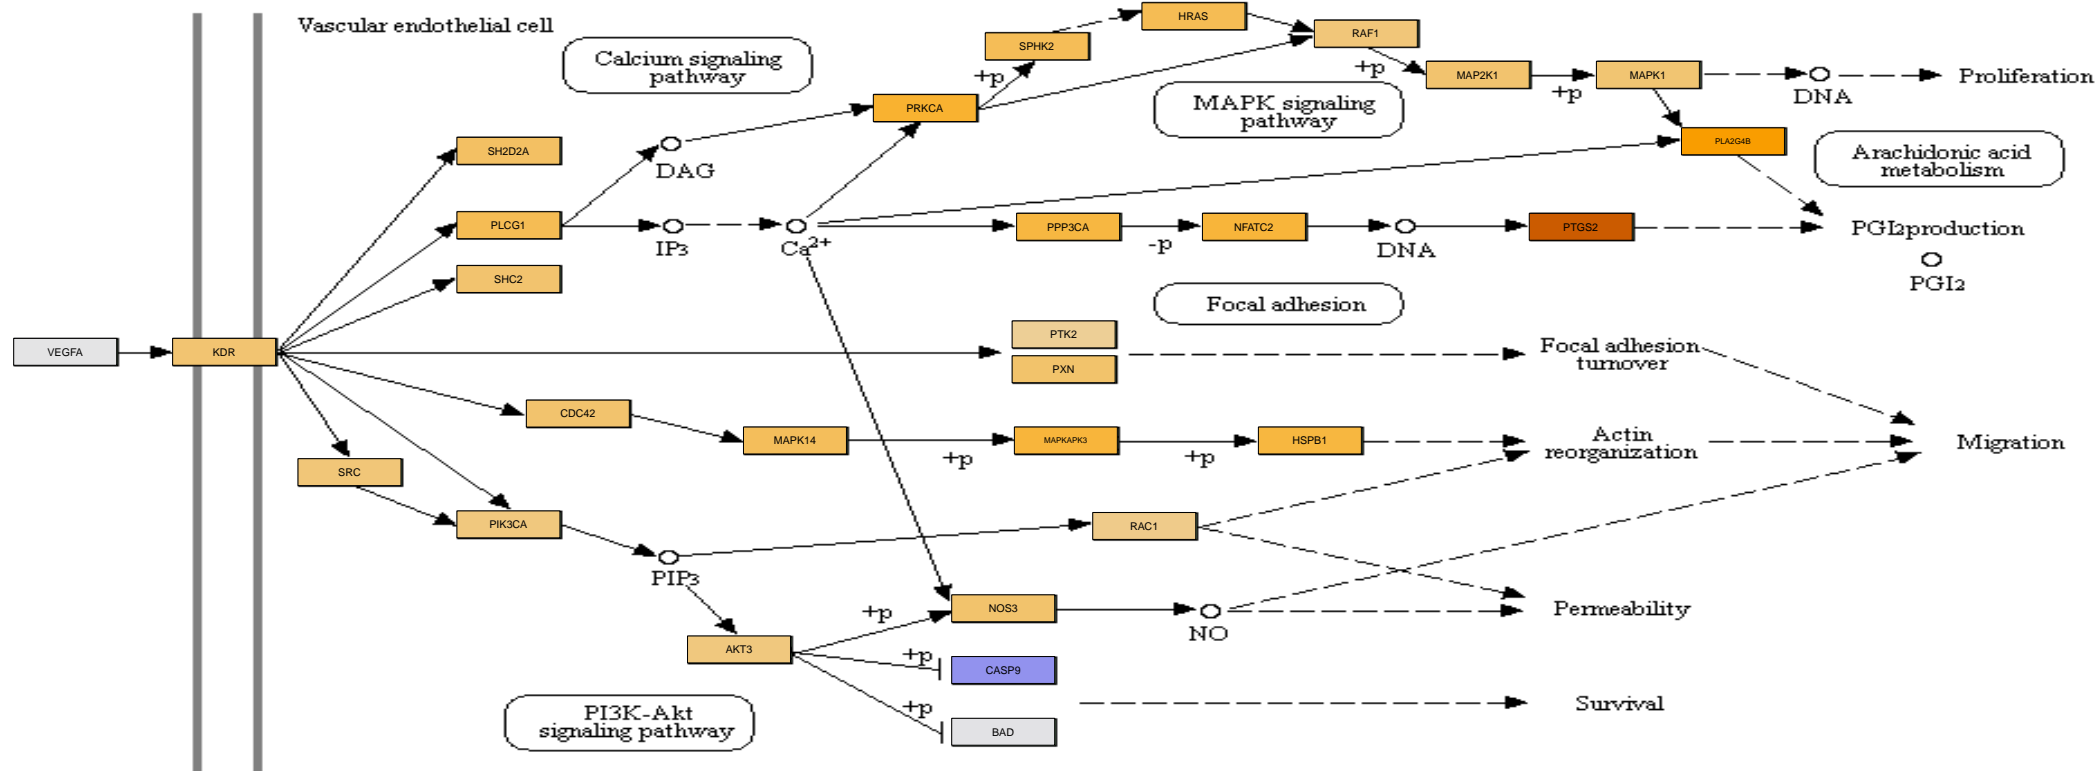

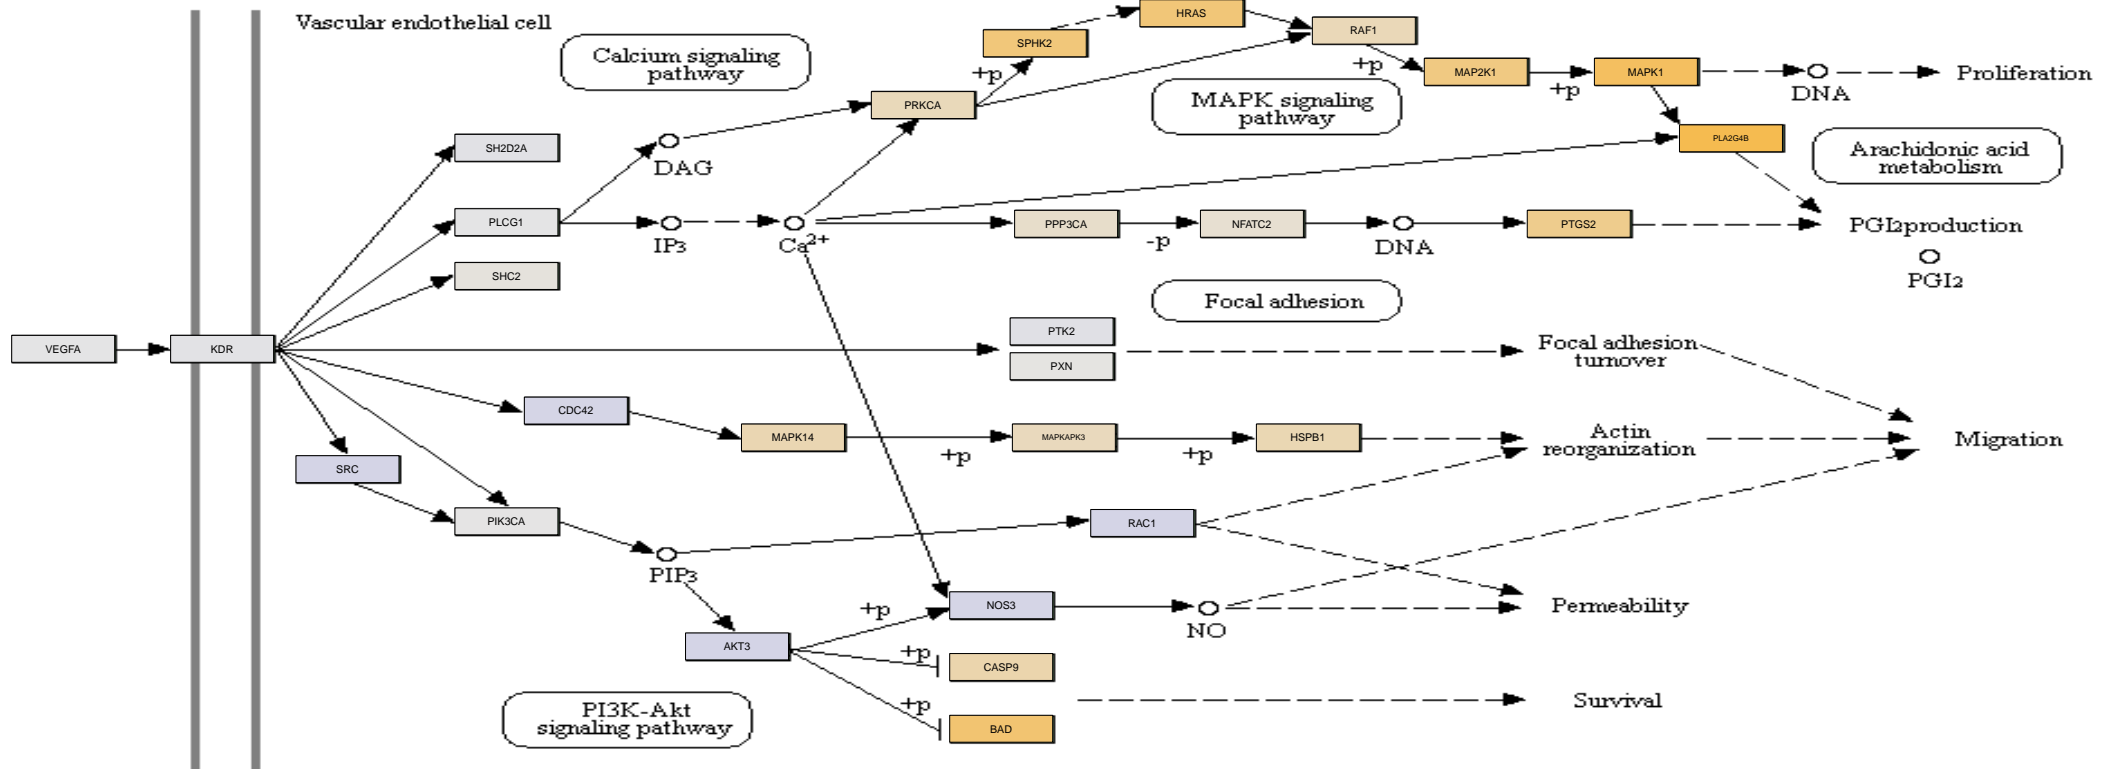

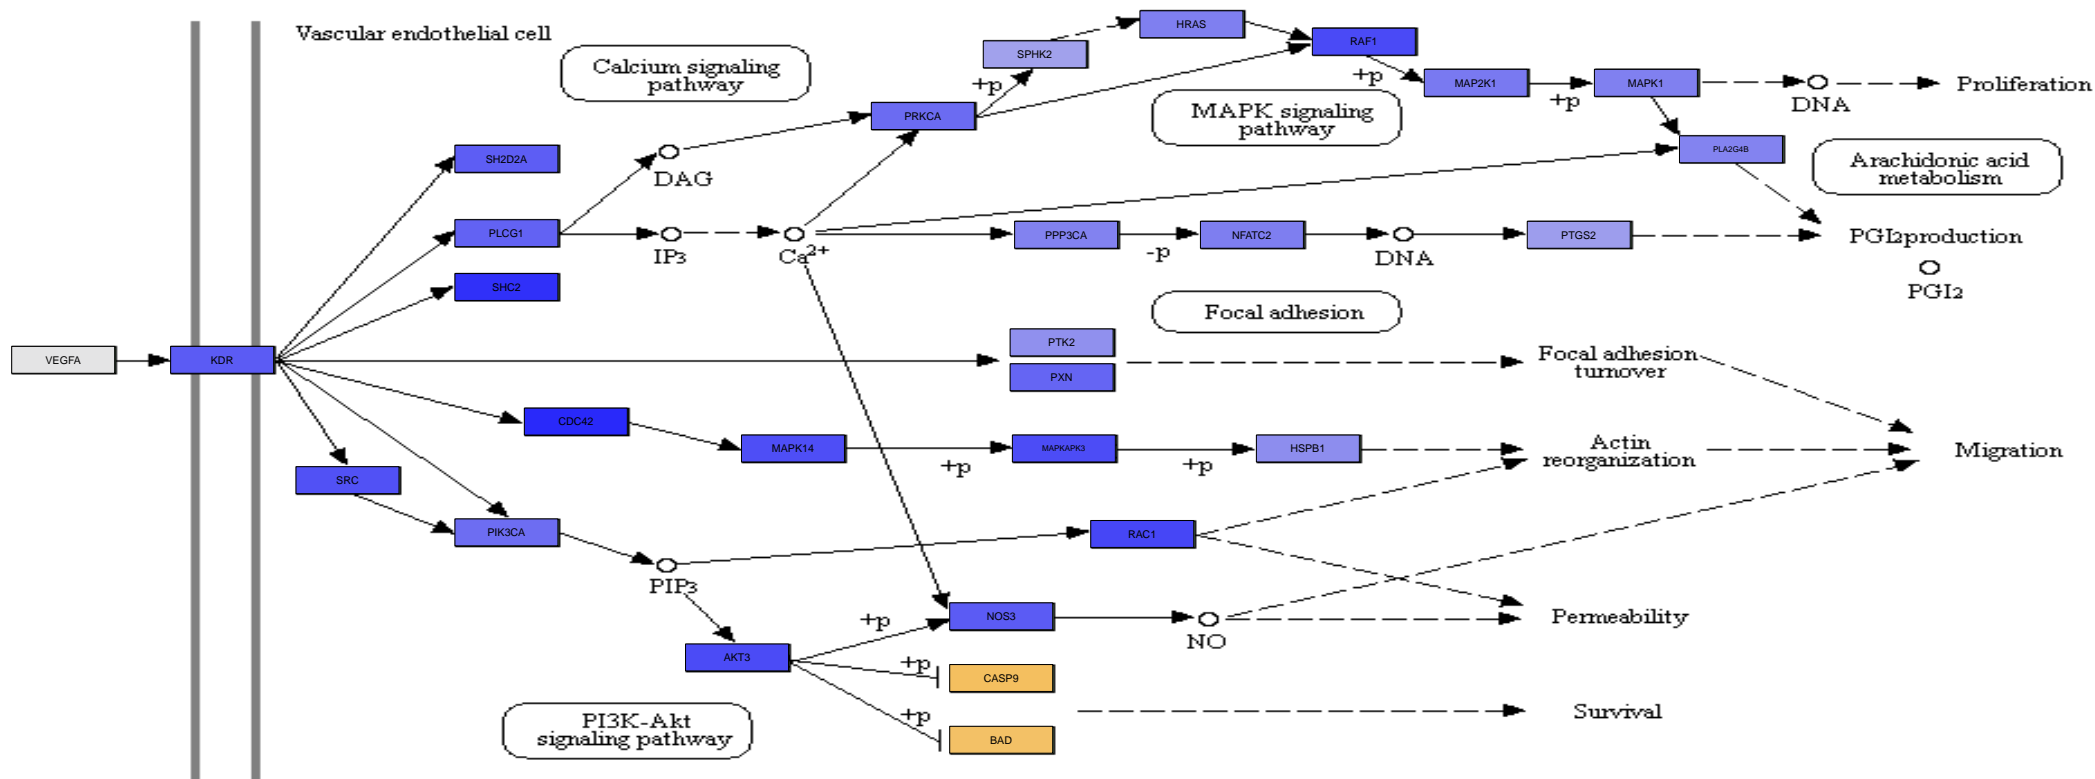



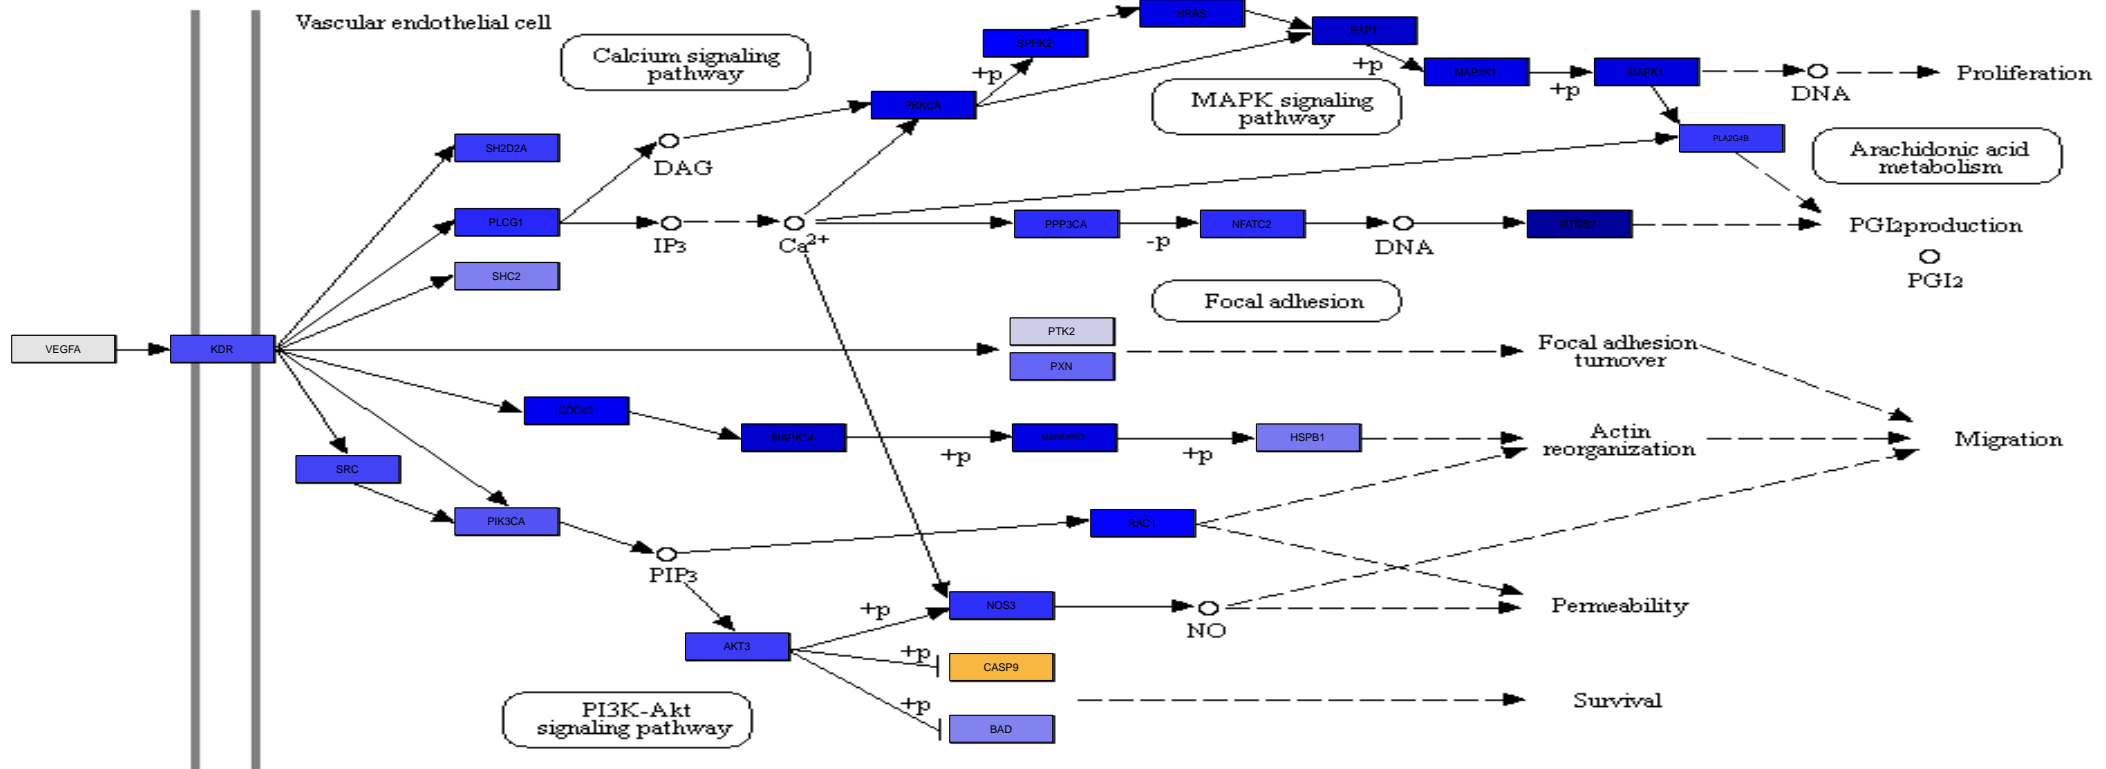

Supplement: s1 [file s1]
