# Supplementary material for: The Transcriptome and Methylome of the Developing and Aging Brain and Their Relations to Gliomas and Psychological Disorders
Source: MDPI journal article supplement (doi:10.3390/cells11030362), 2022-01-21

Oxytocin signaling pathway

all genes

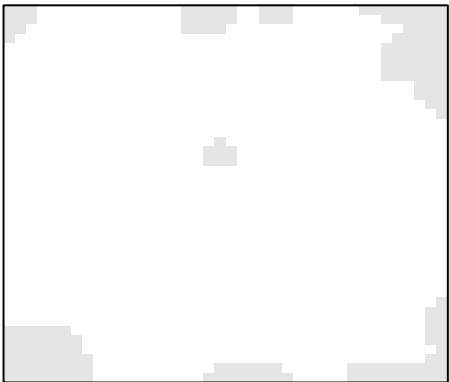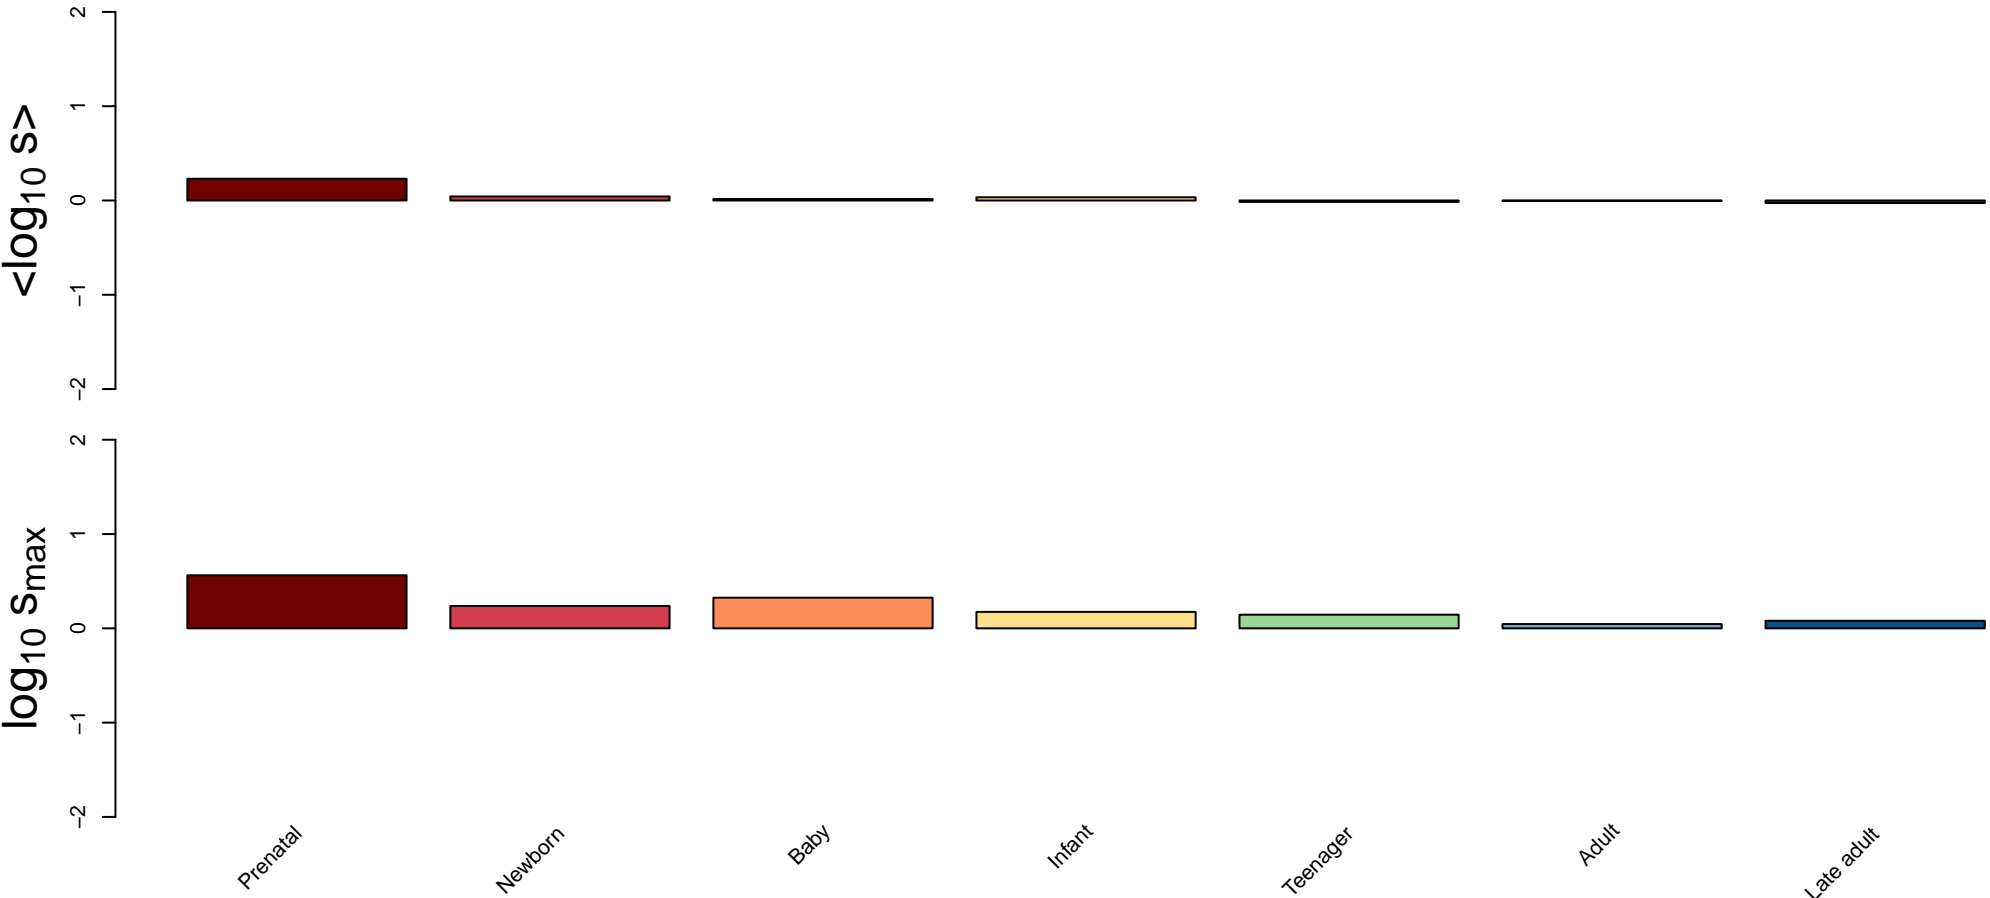

Oxytocin signaling pathway  
genes with data

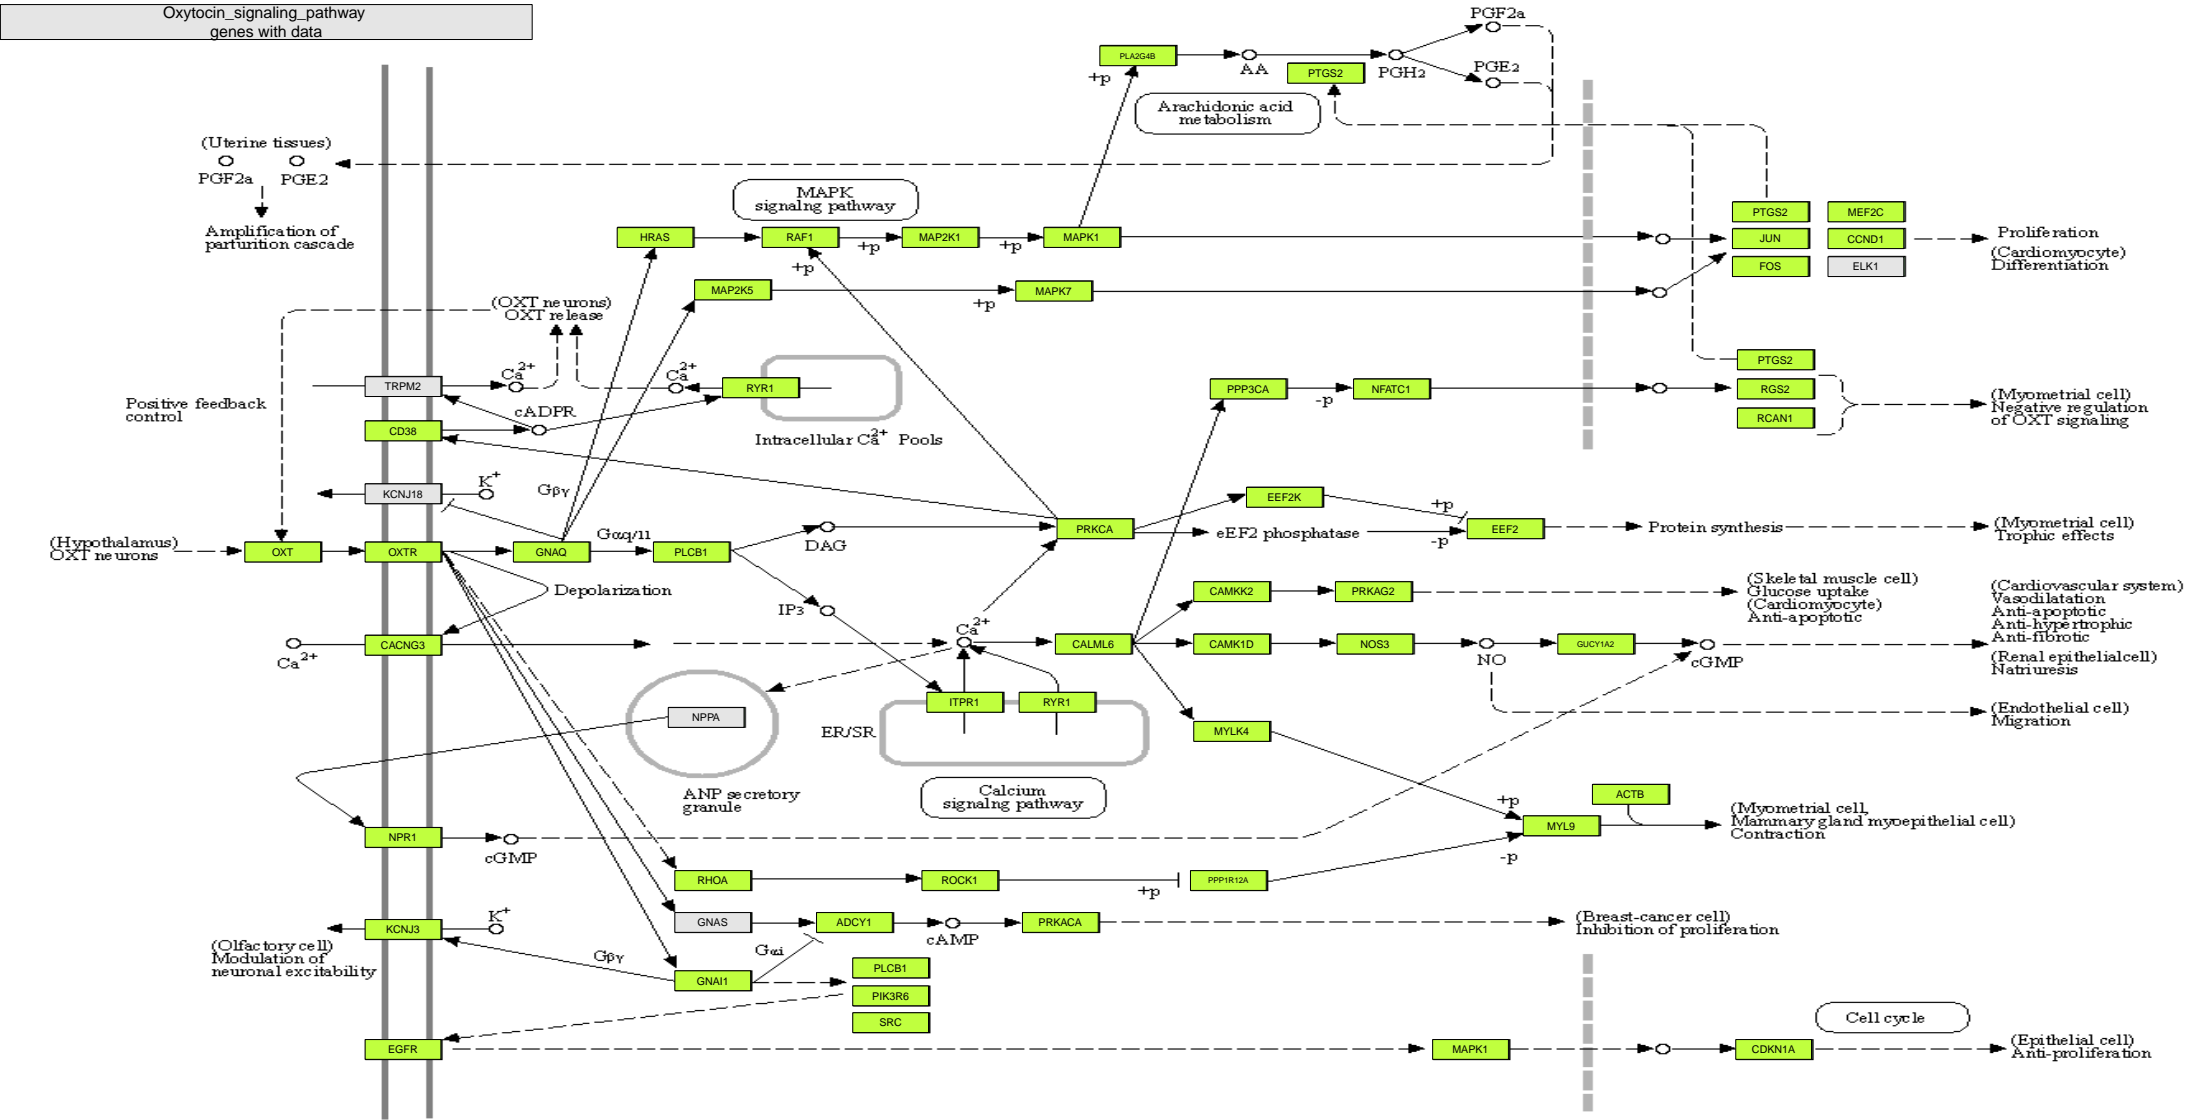

Oxytocin signaling pathway  
sink nodes

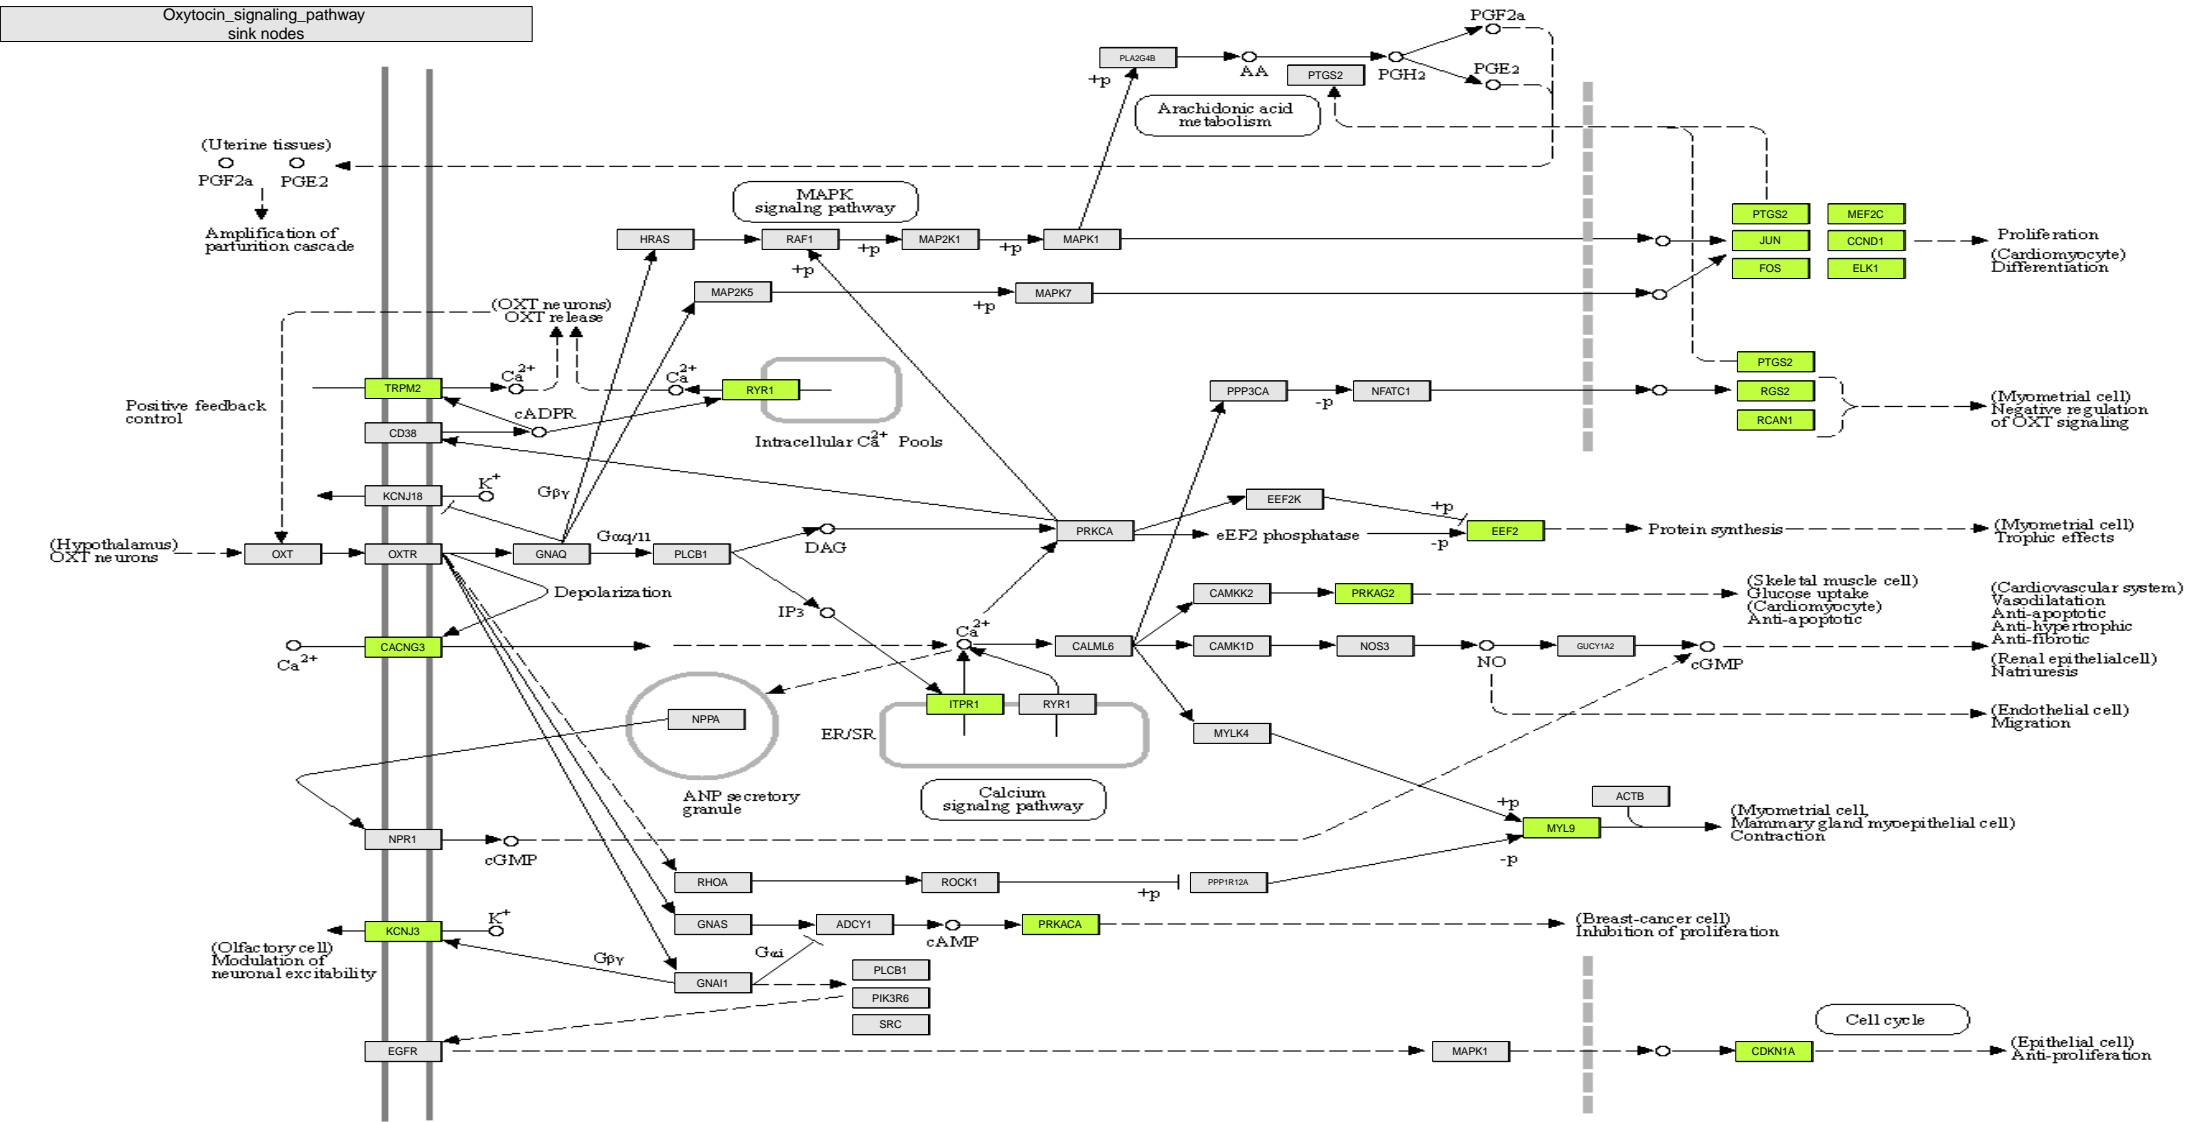

Oxytocin signaling pathway  
Prenatal

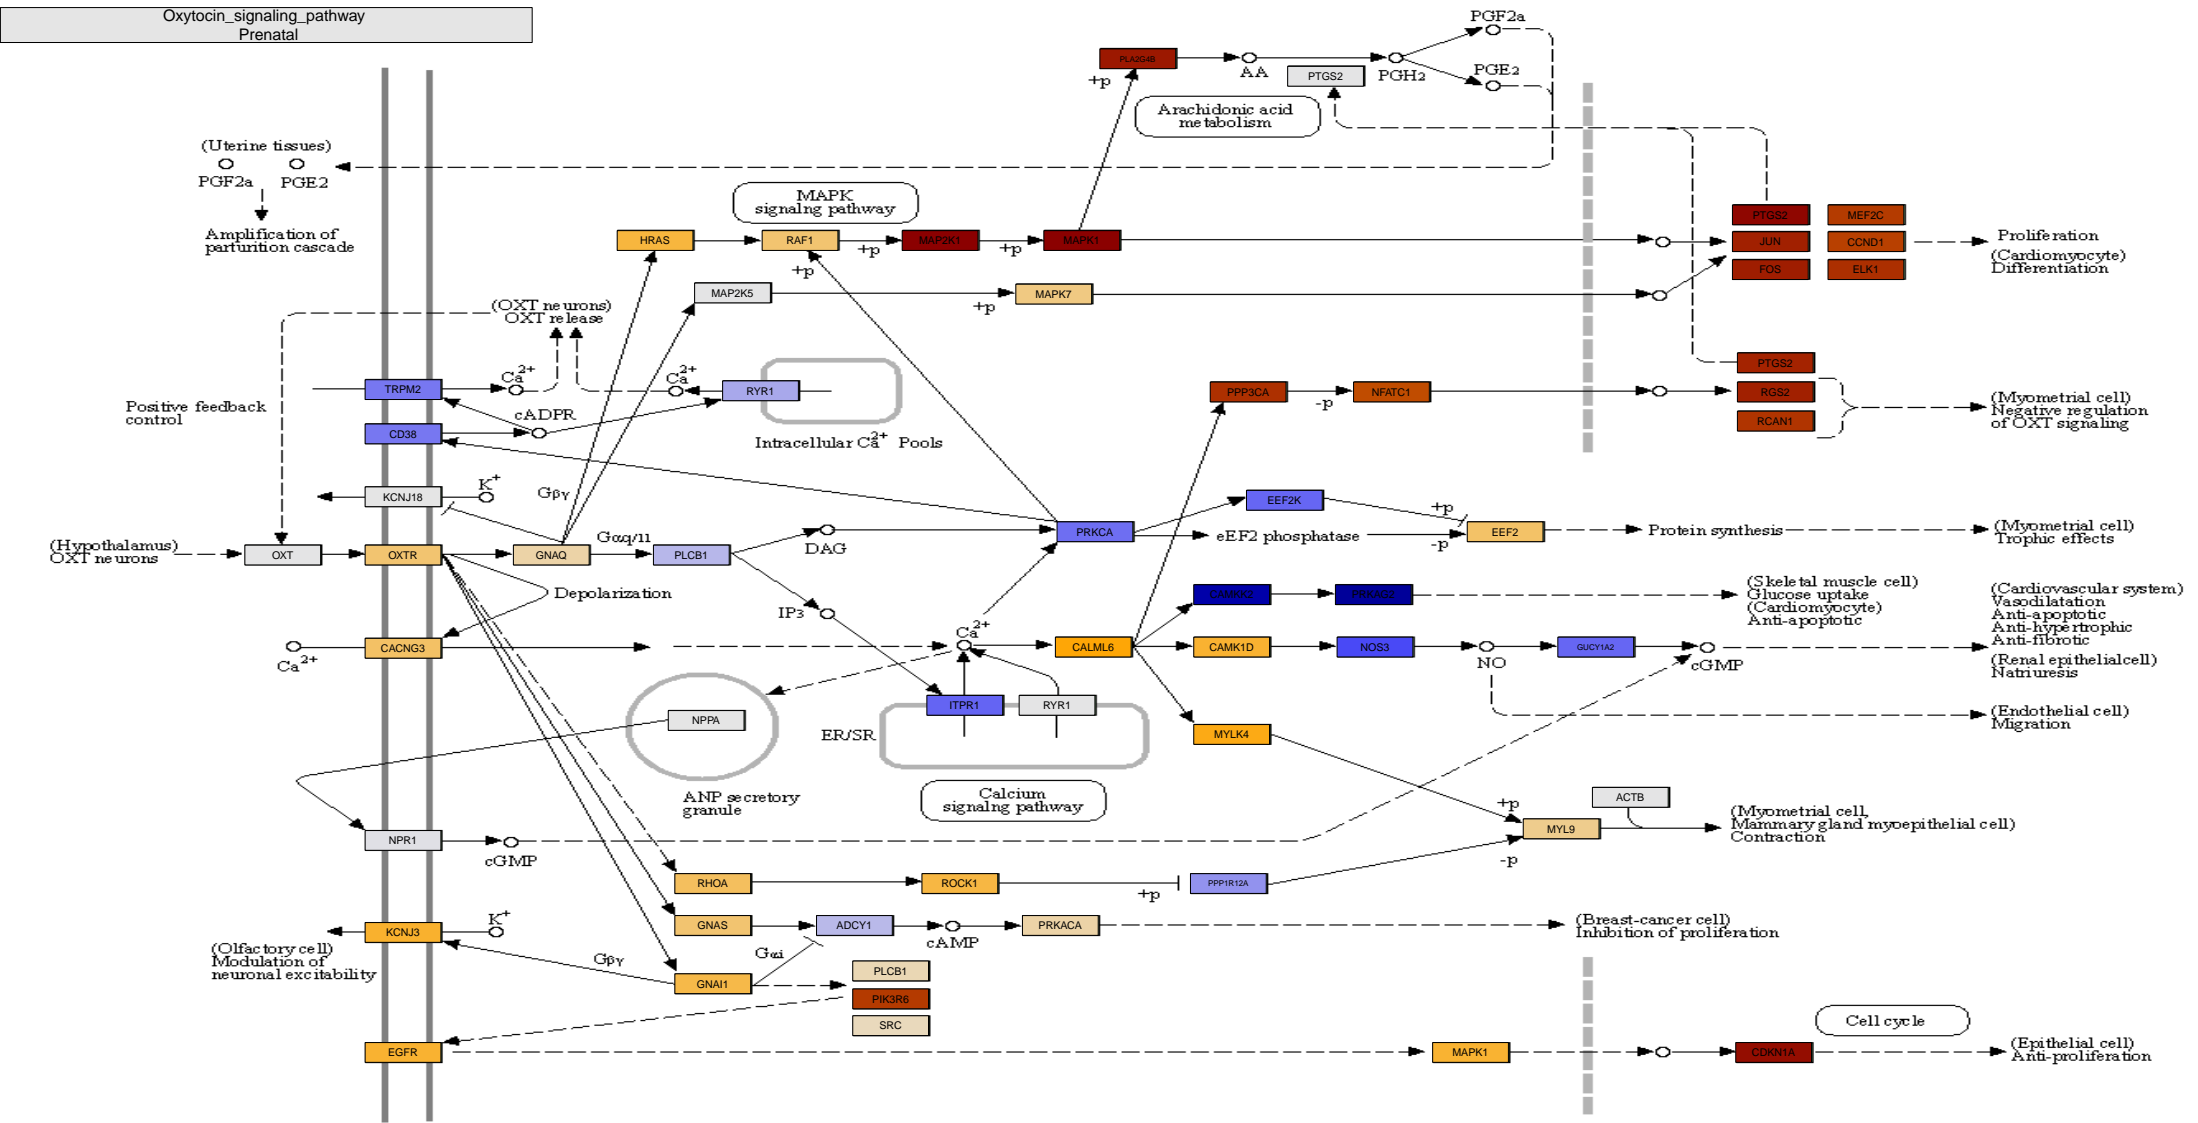

Oxytocin signaling pathway  
Newborn

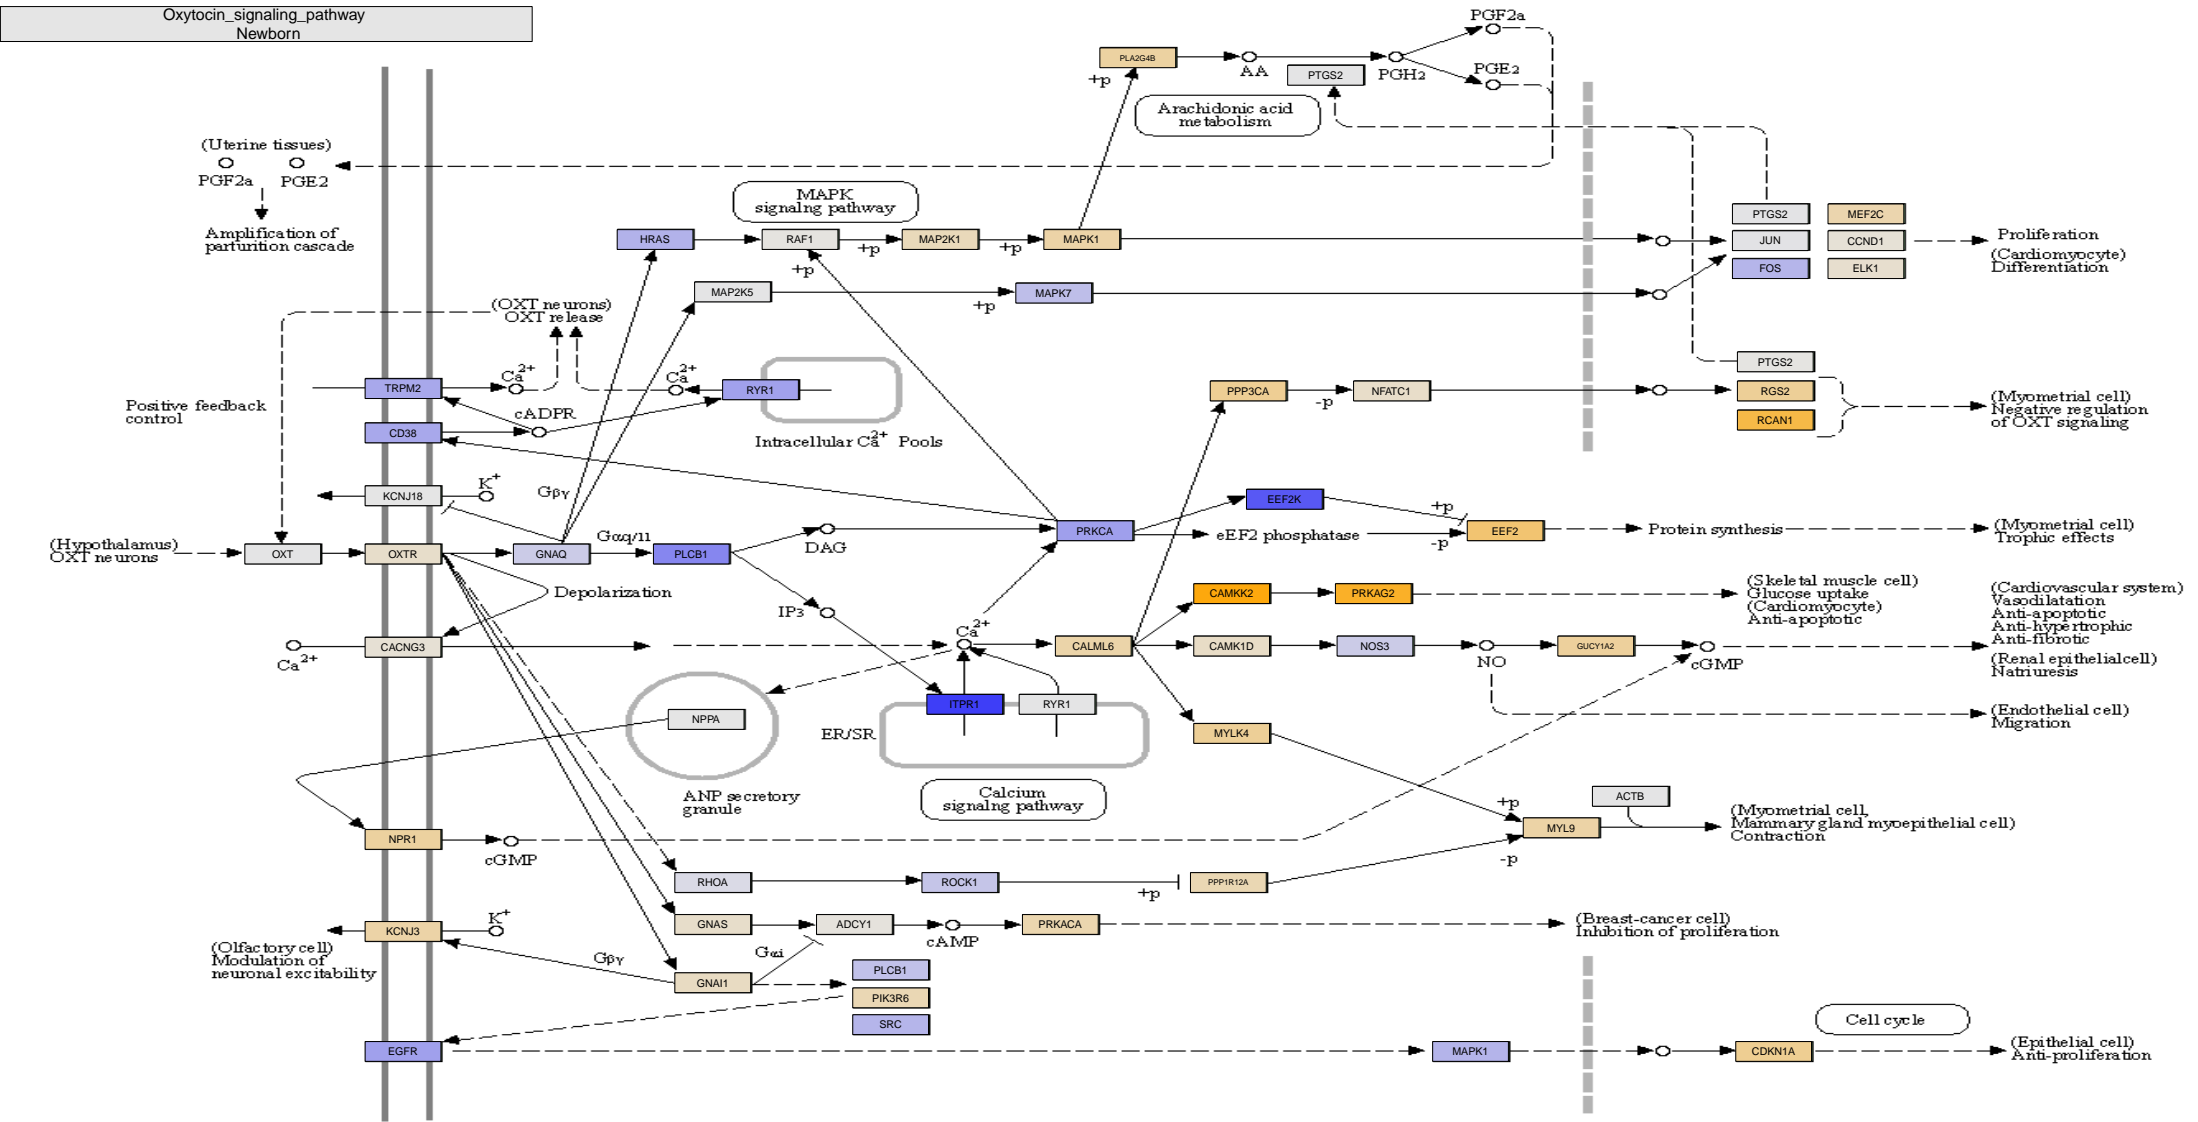

Oxytocin signaling pathway  
Baby

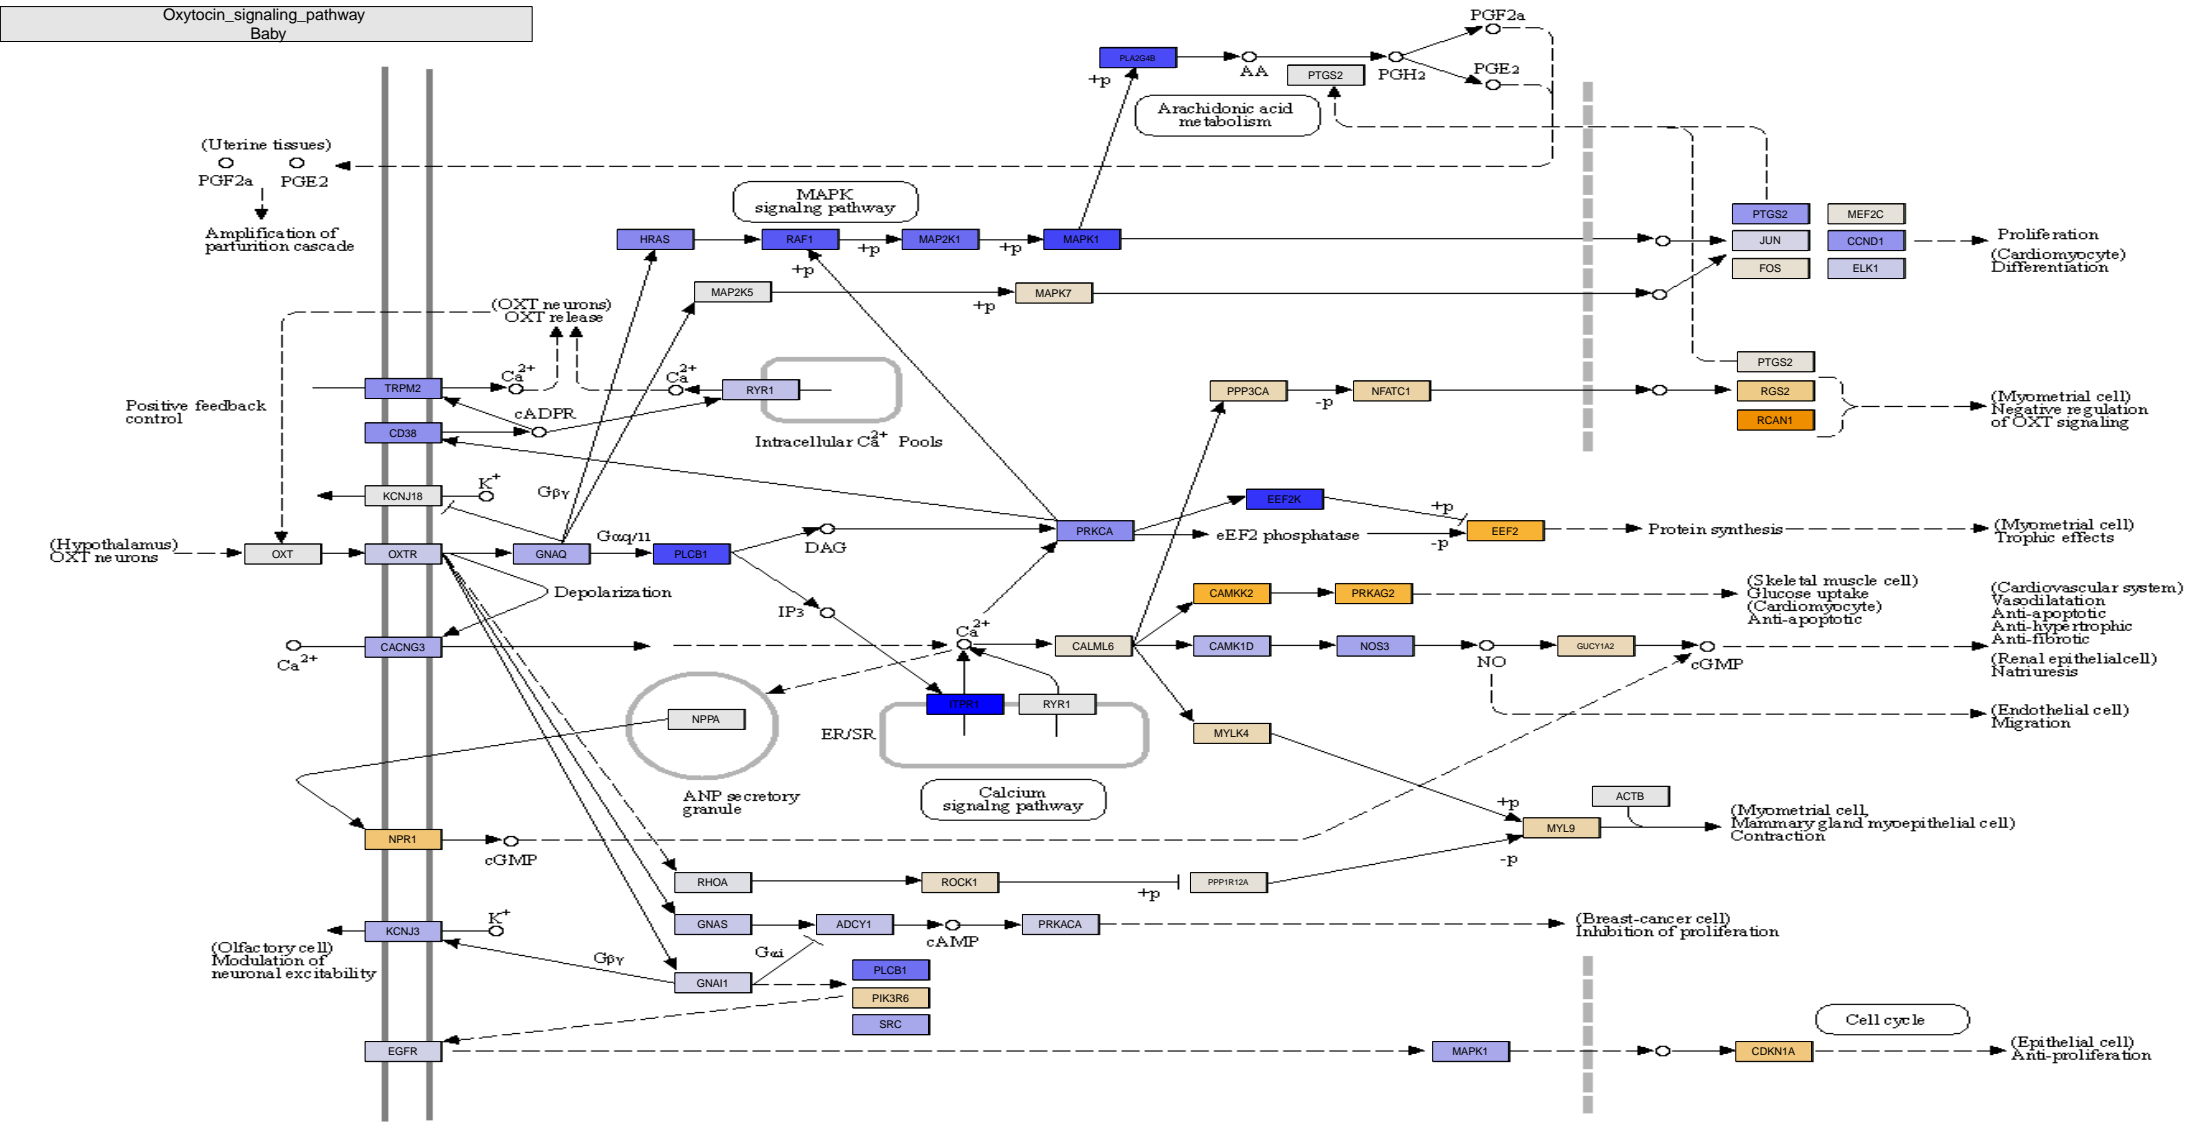

Oxytocin signaling pathway  
Infant

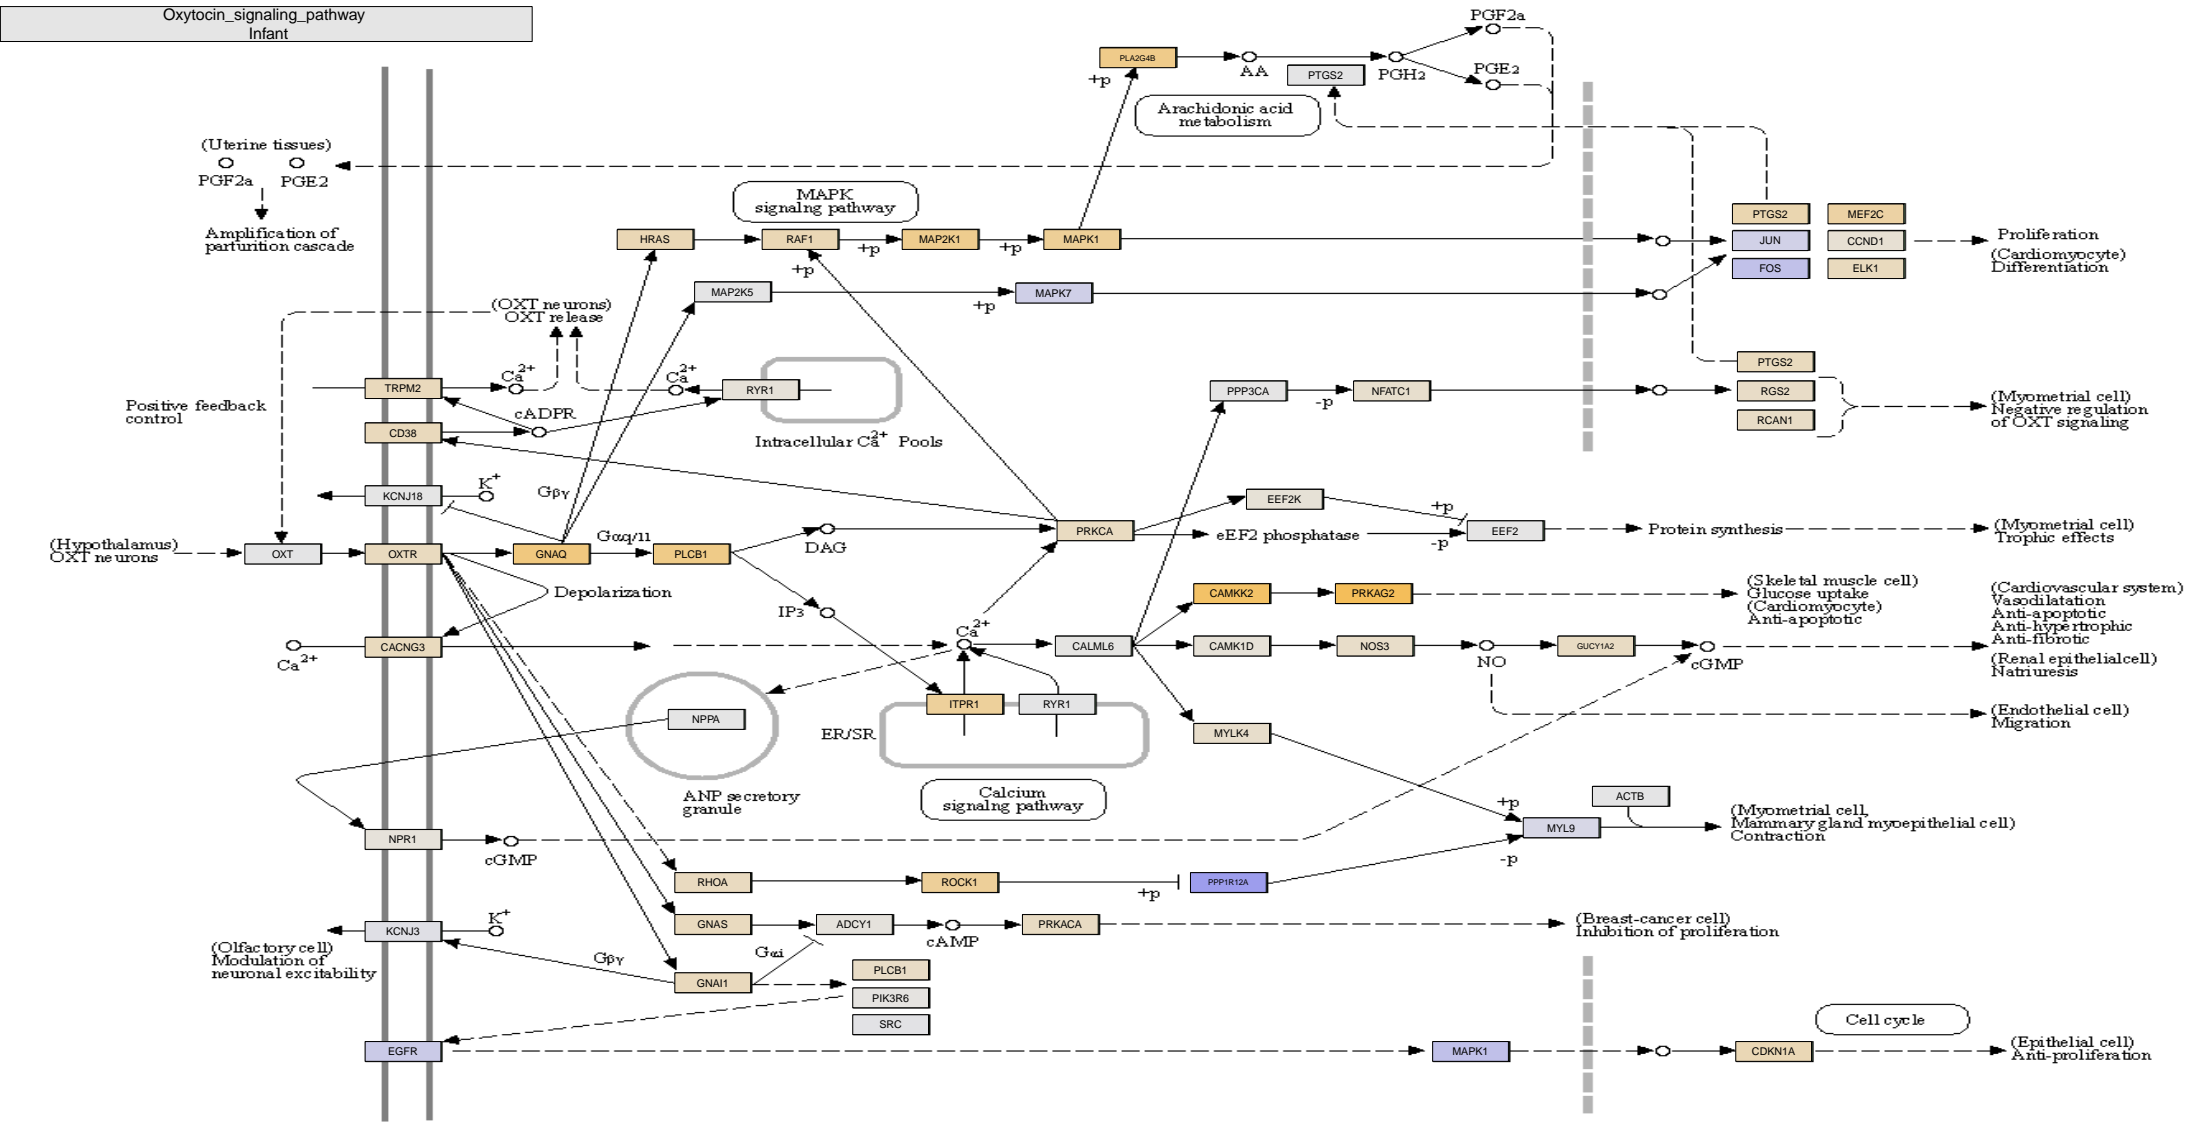

Oxytocin signaling pathway  
Teenager

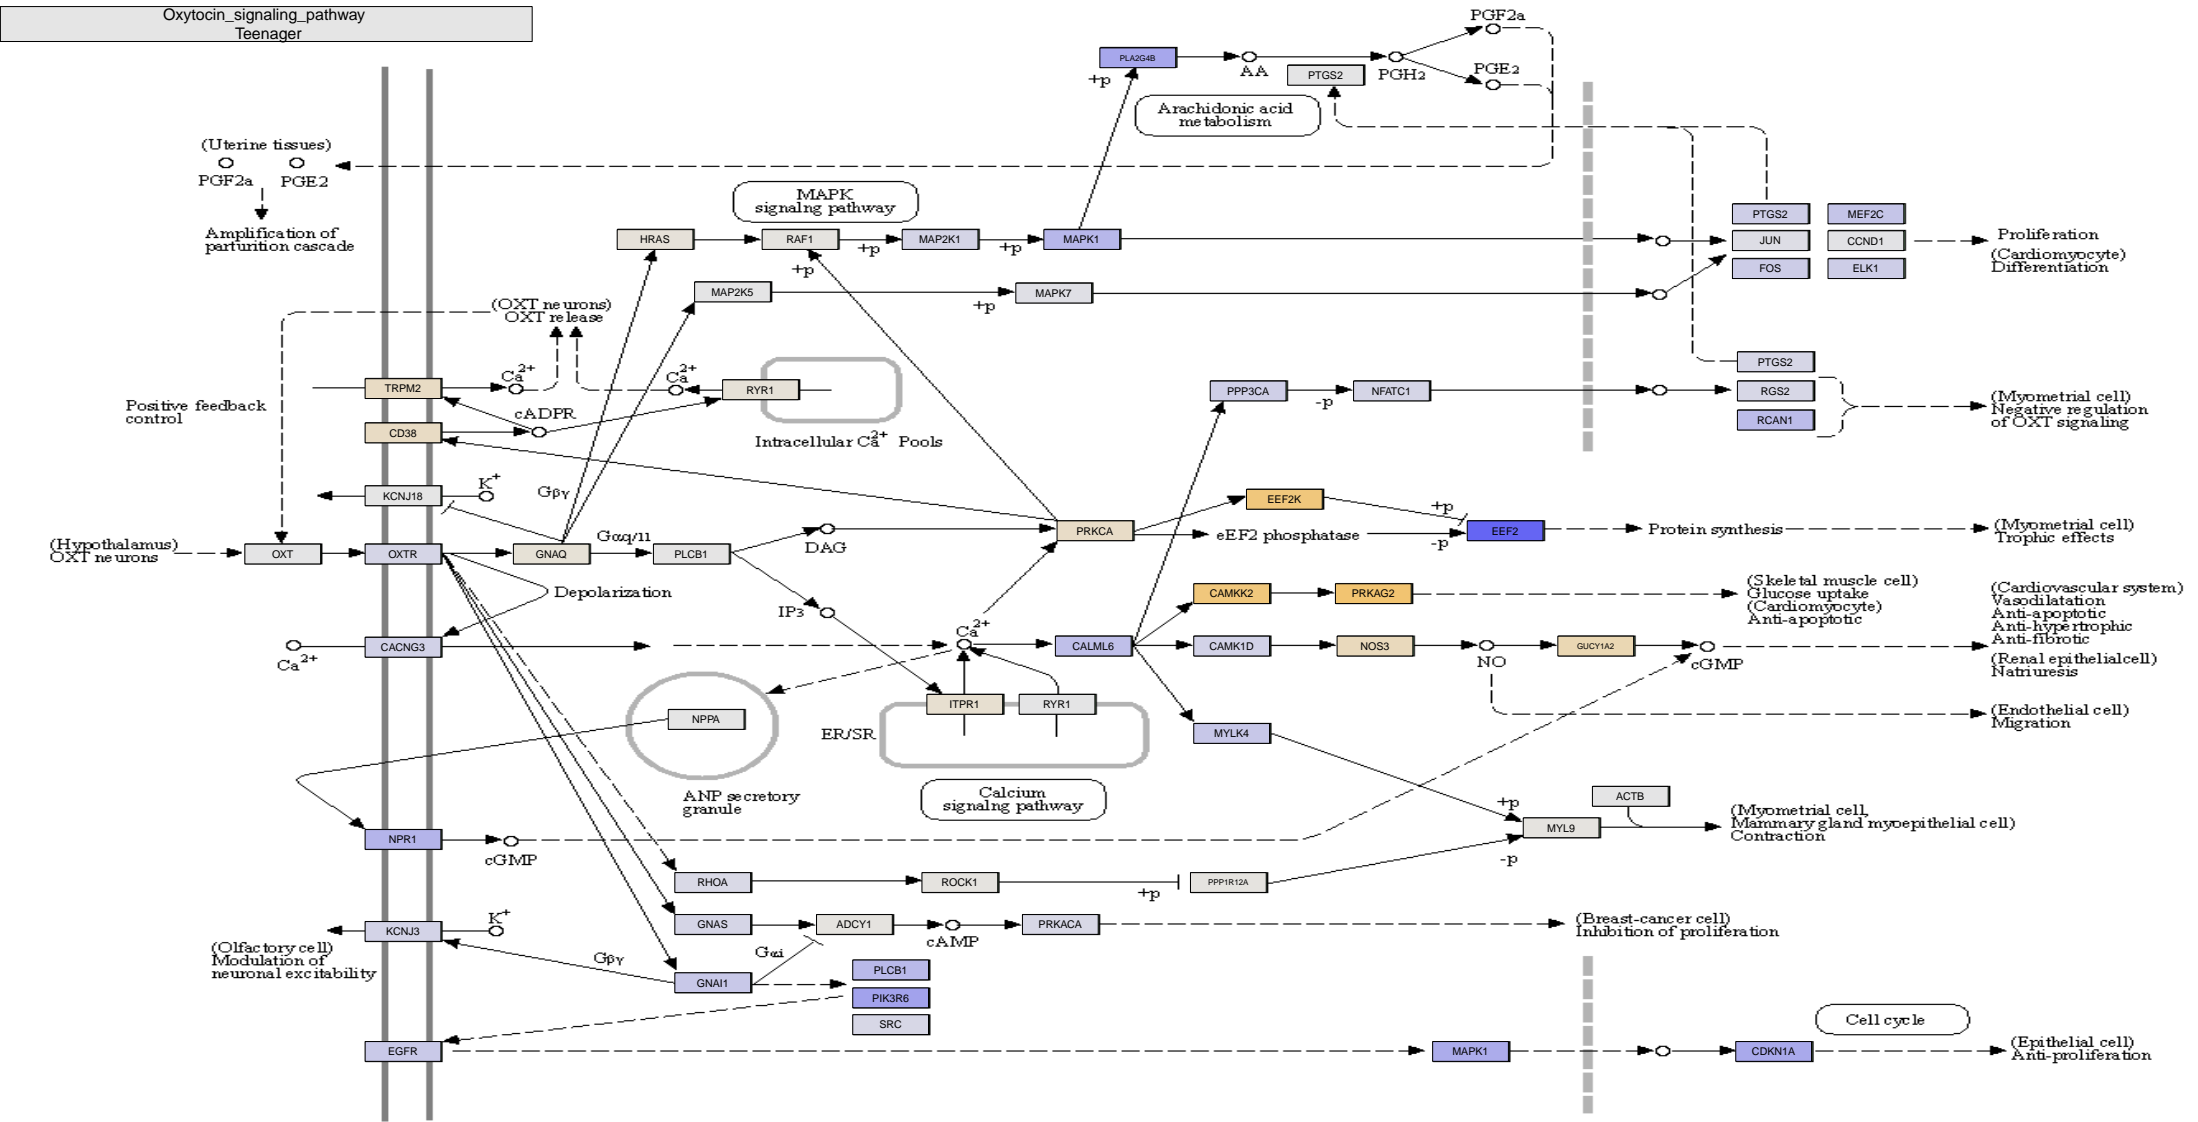



Oxytocin signaling pathway  
Adult

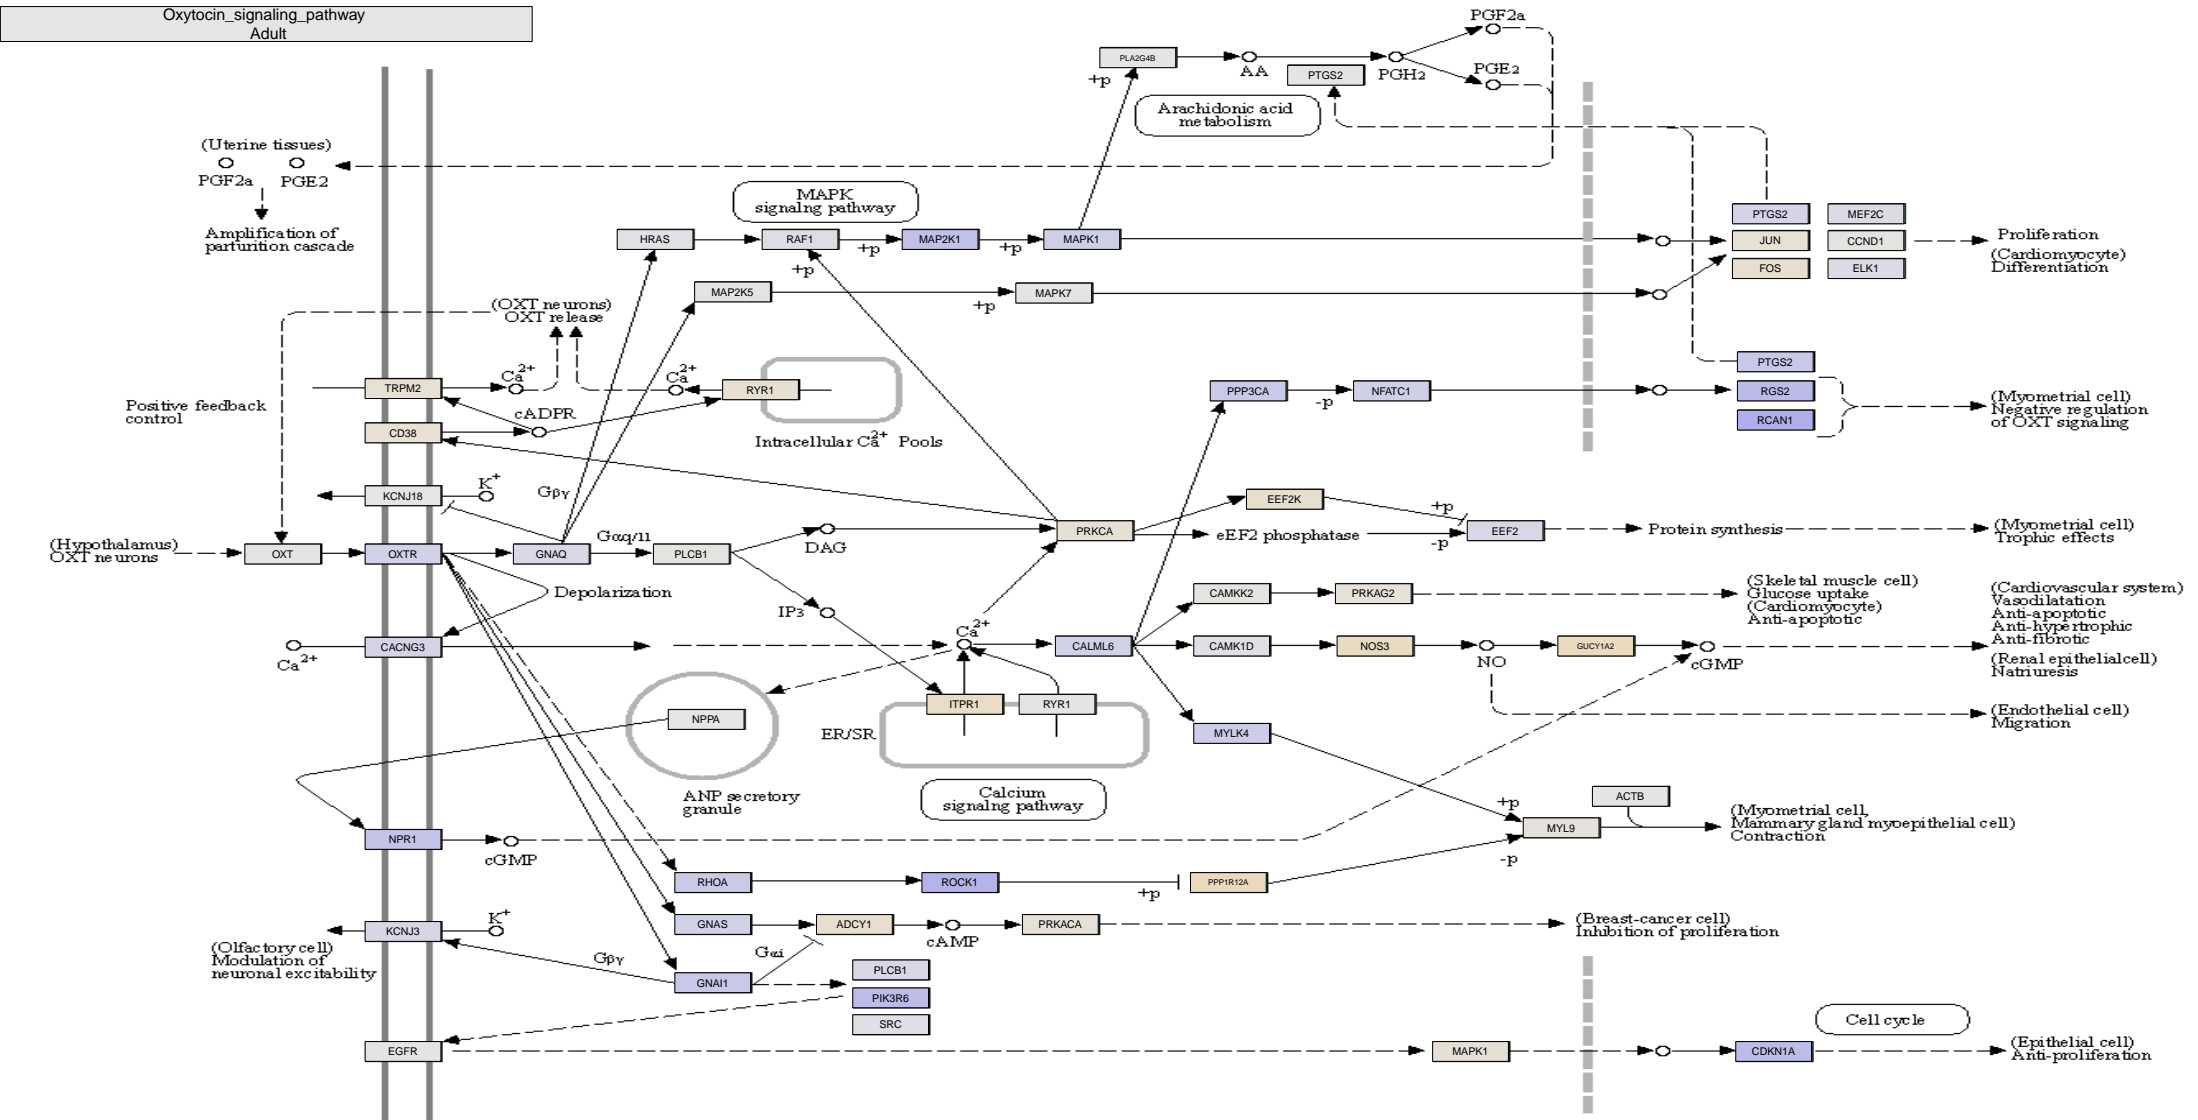

Supplement: s1 [file s1]
