# Supplementary material for: The Transcriptome and Methylome of the Developing and Aging Brain and Their Relations to Gliomas and Psychological Disorders
Source: MDPI journal article supplement (doi:10.3390/cells11030362), 2022-01-21

cGMP-PKG signaling pathway

all genes

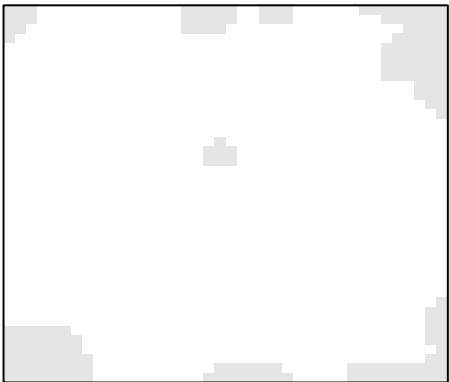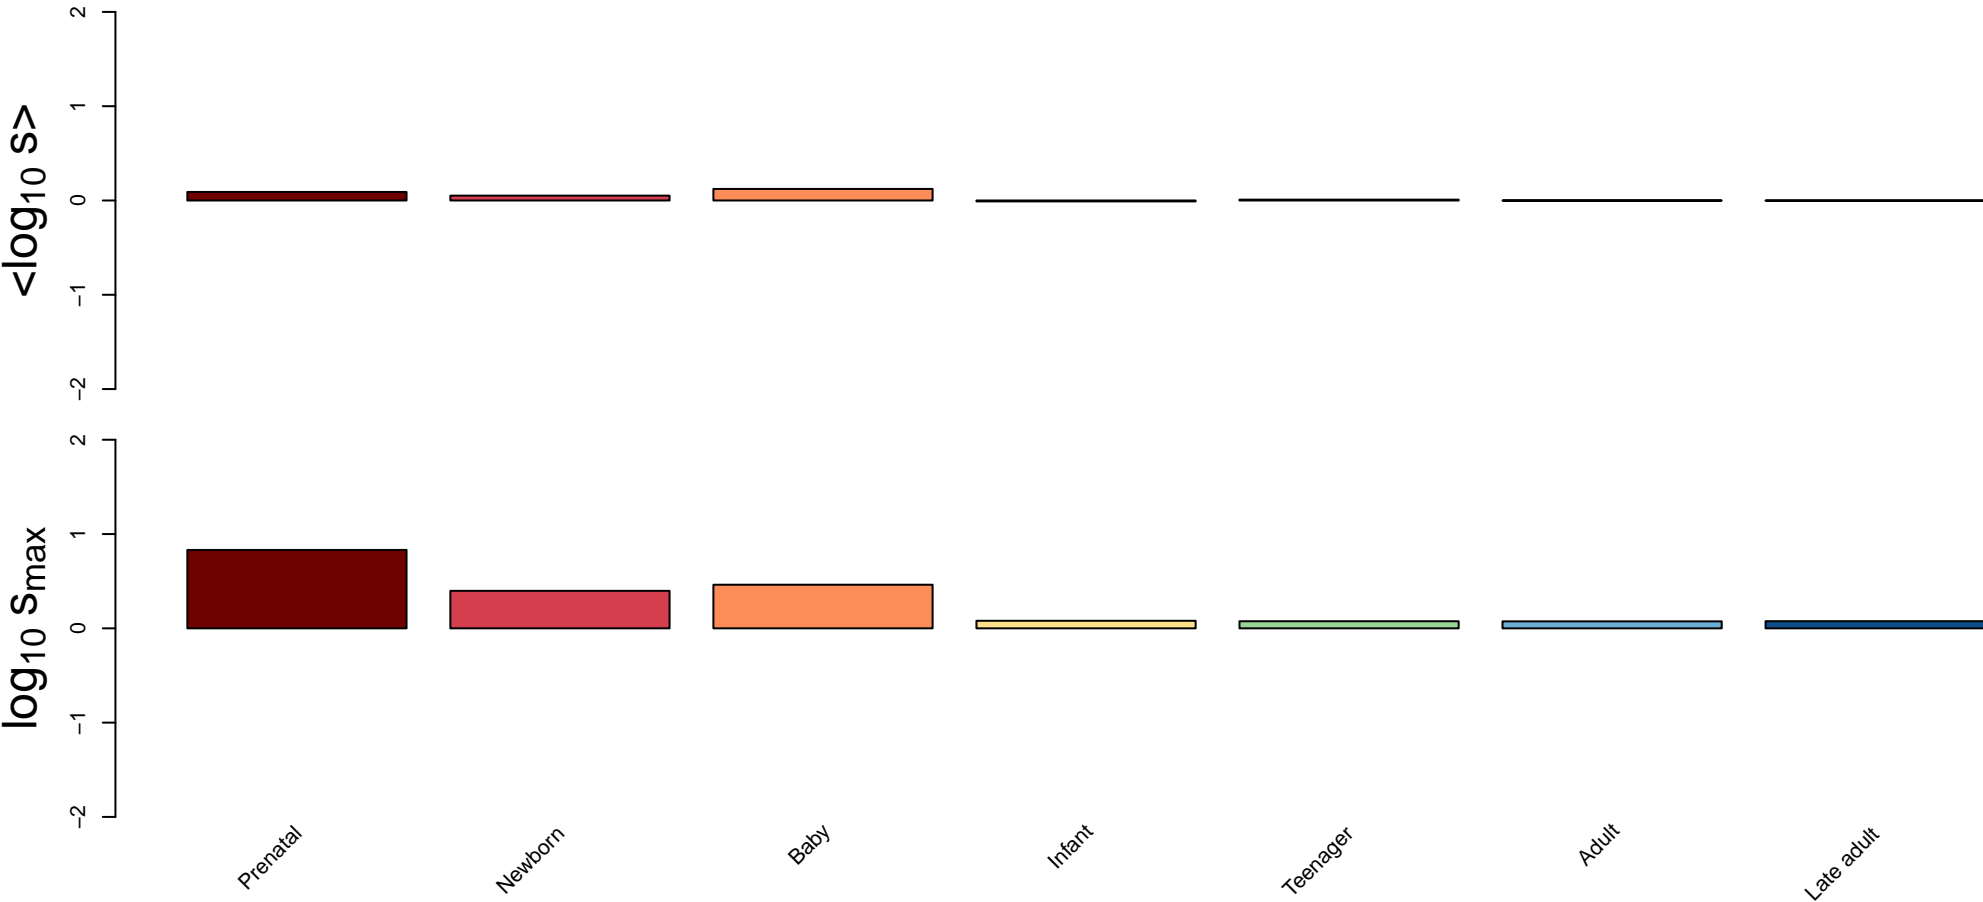

cGMP\_PKG\_signaling\_pathway  
genes with data

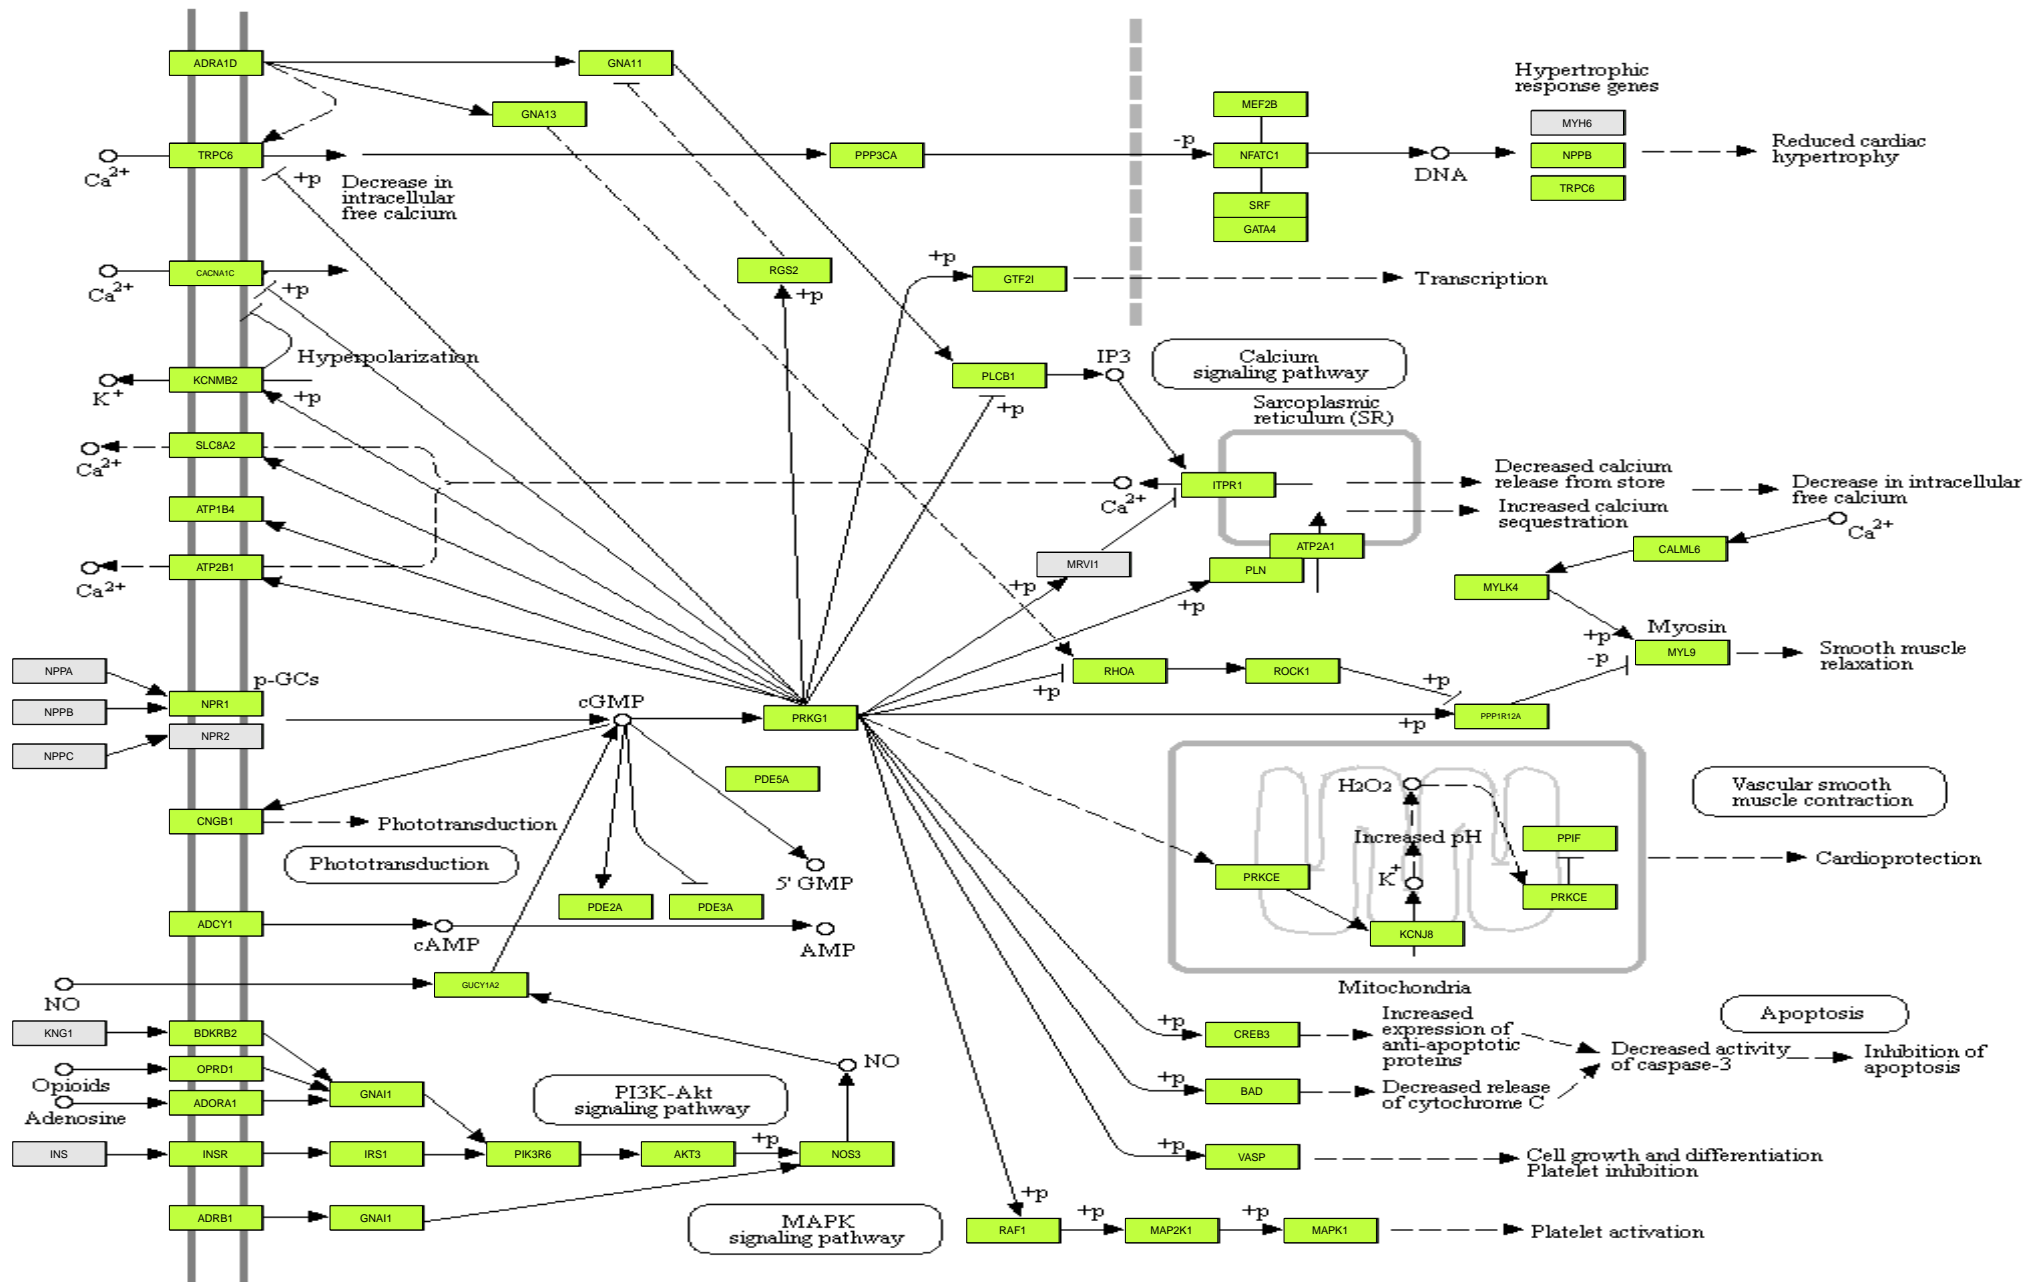

cGMP\_PKG\_signaling\_pathway  
sink nodes

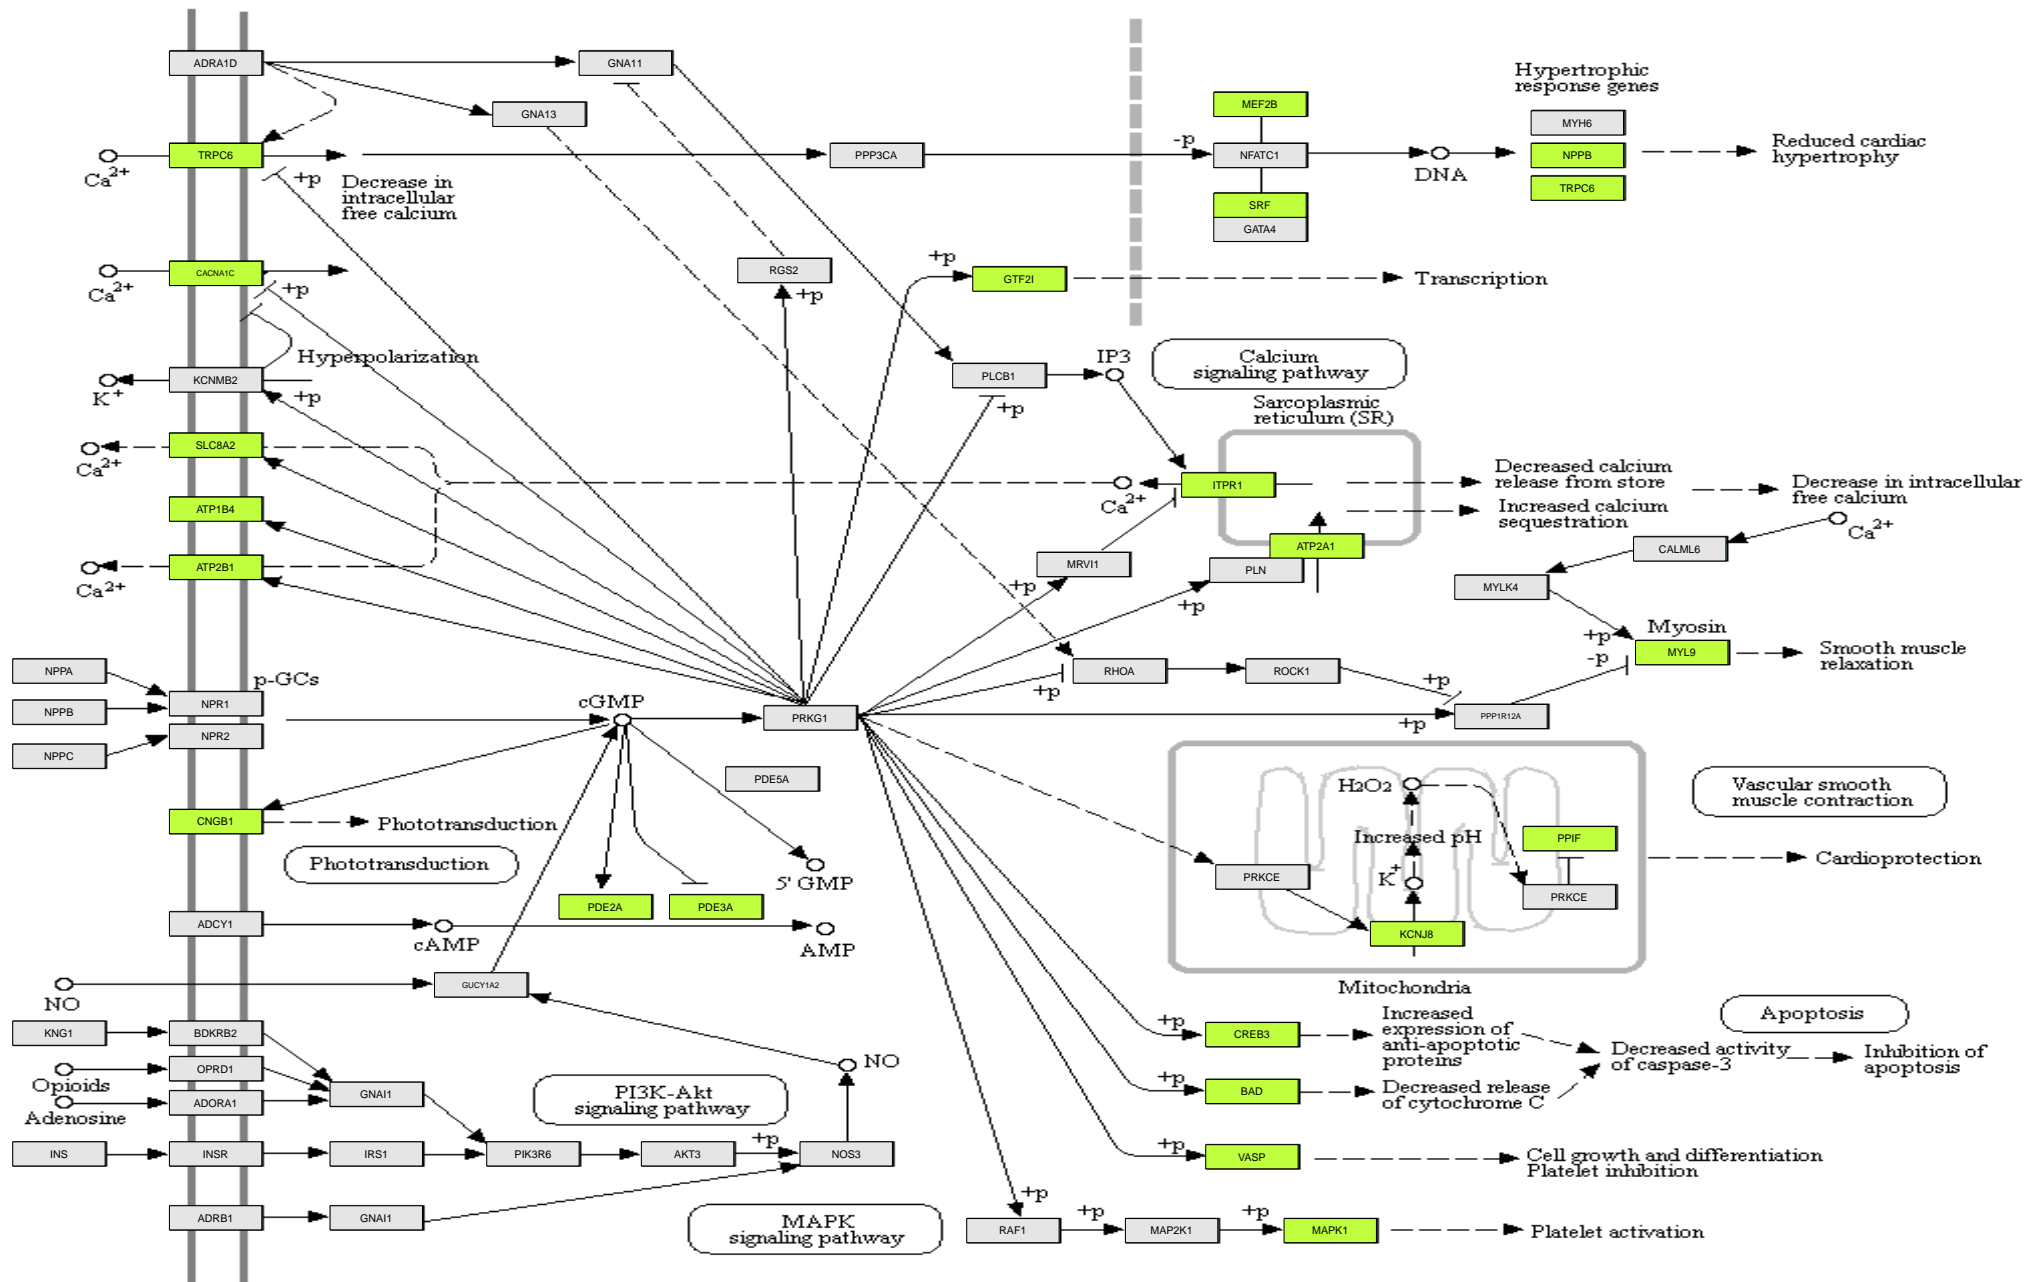

cGMP\_PKG\_signaling\_pathway  
Prenatal

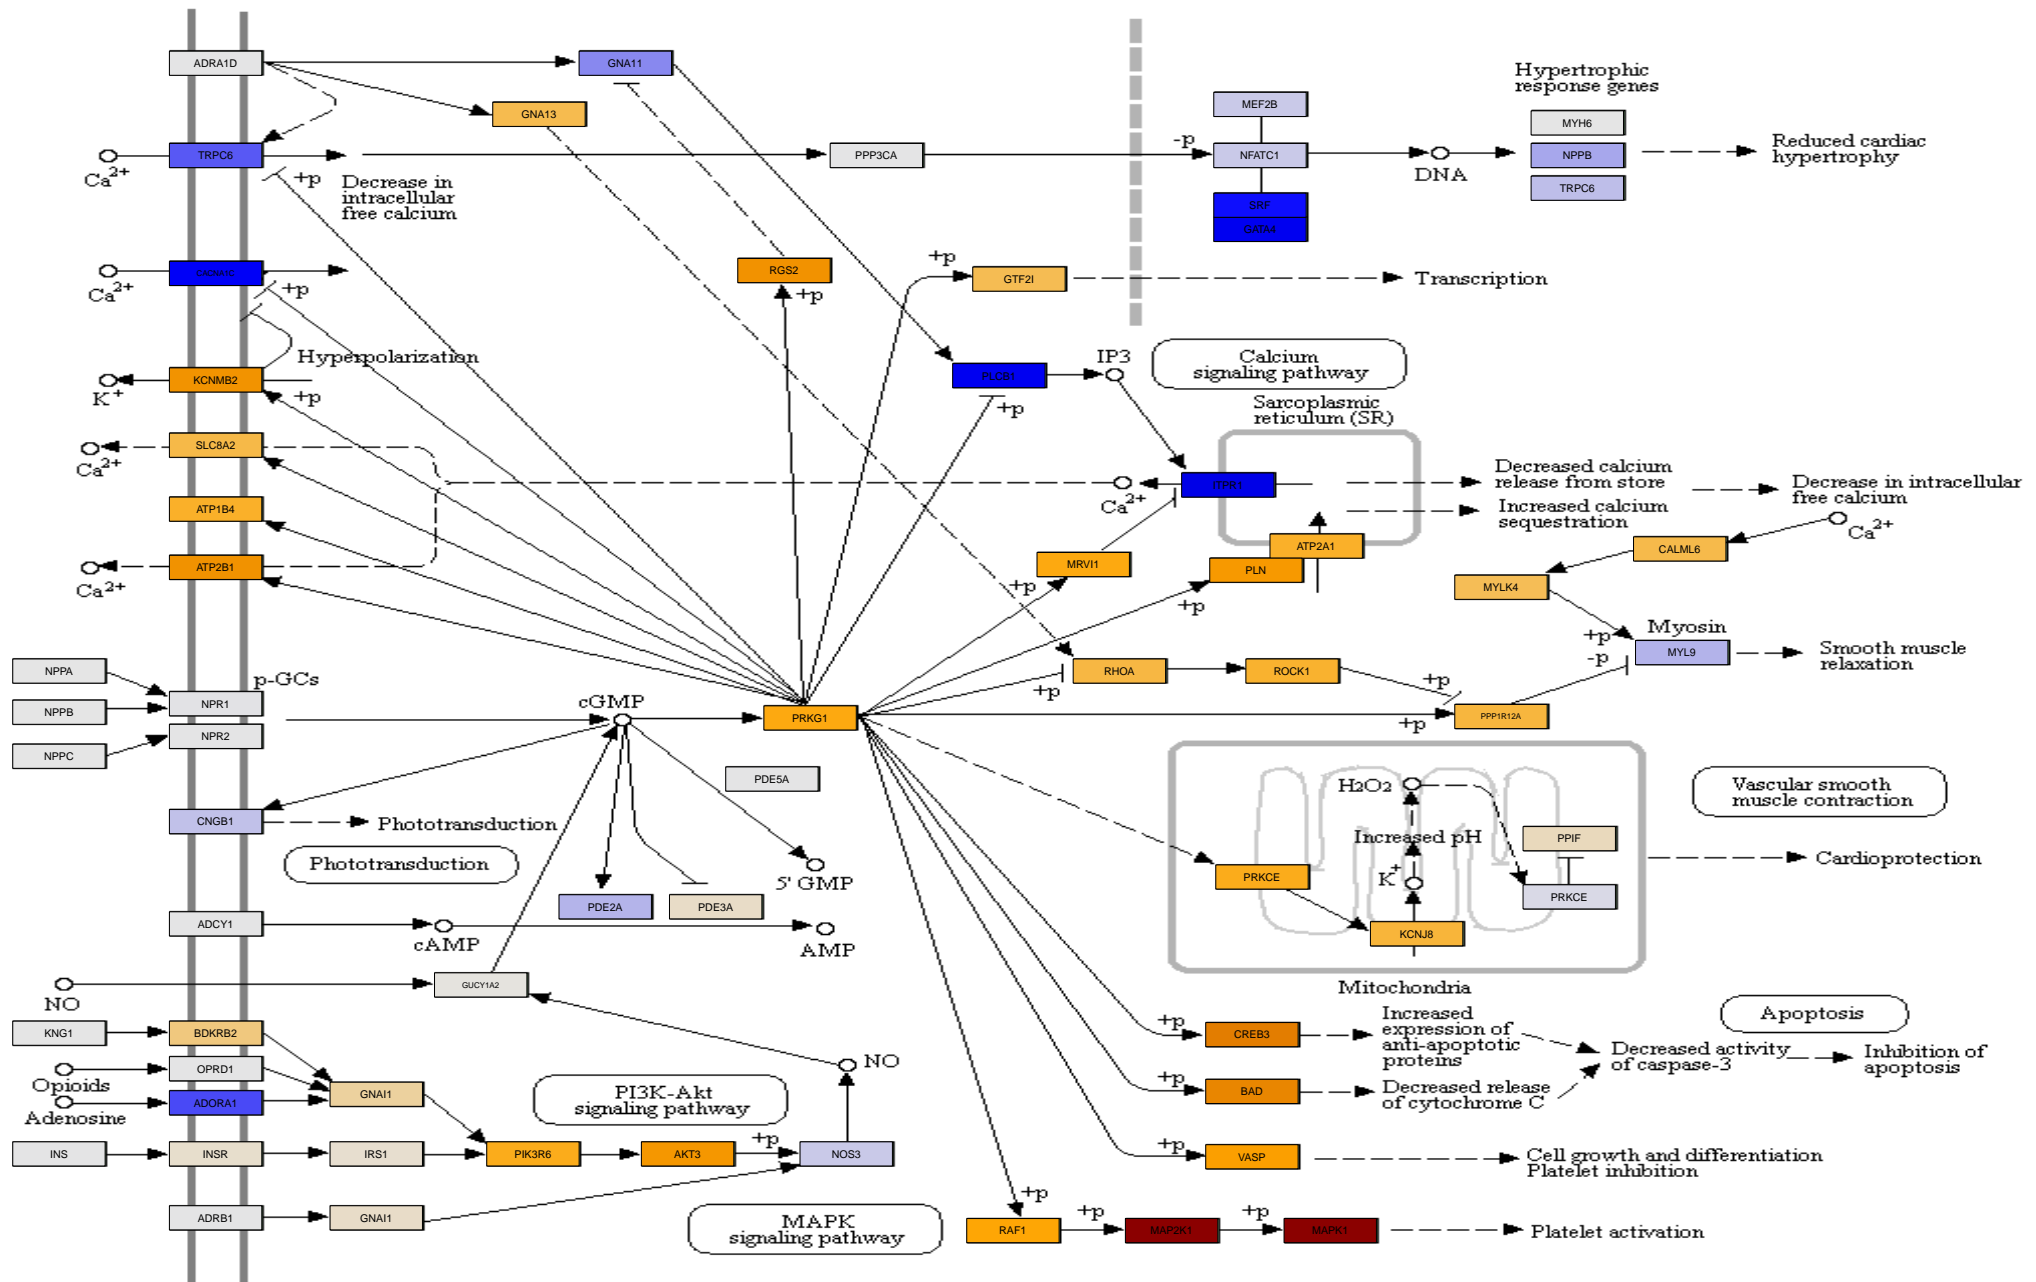

# cGMP\_PKG\_signaling\_pathway Newborn

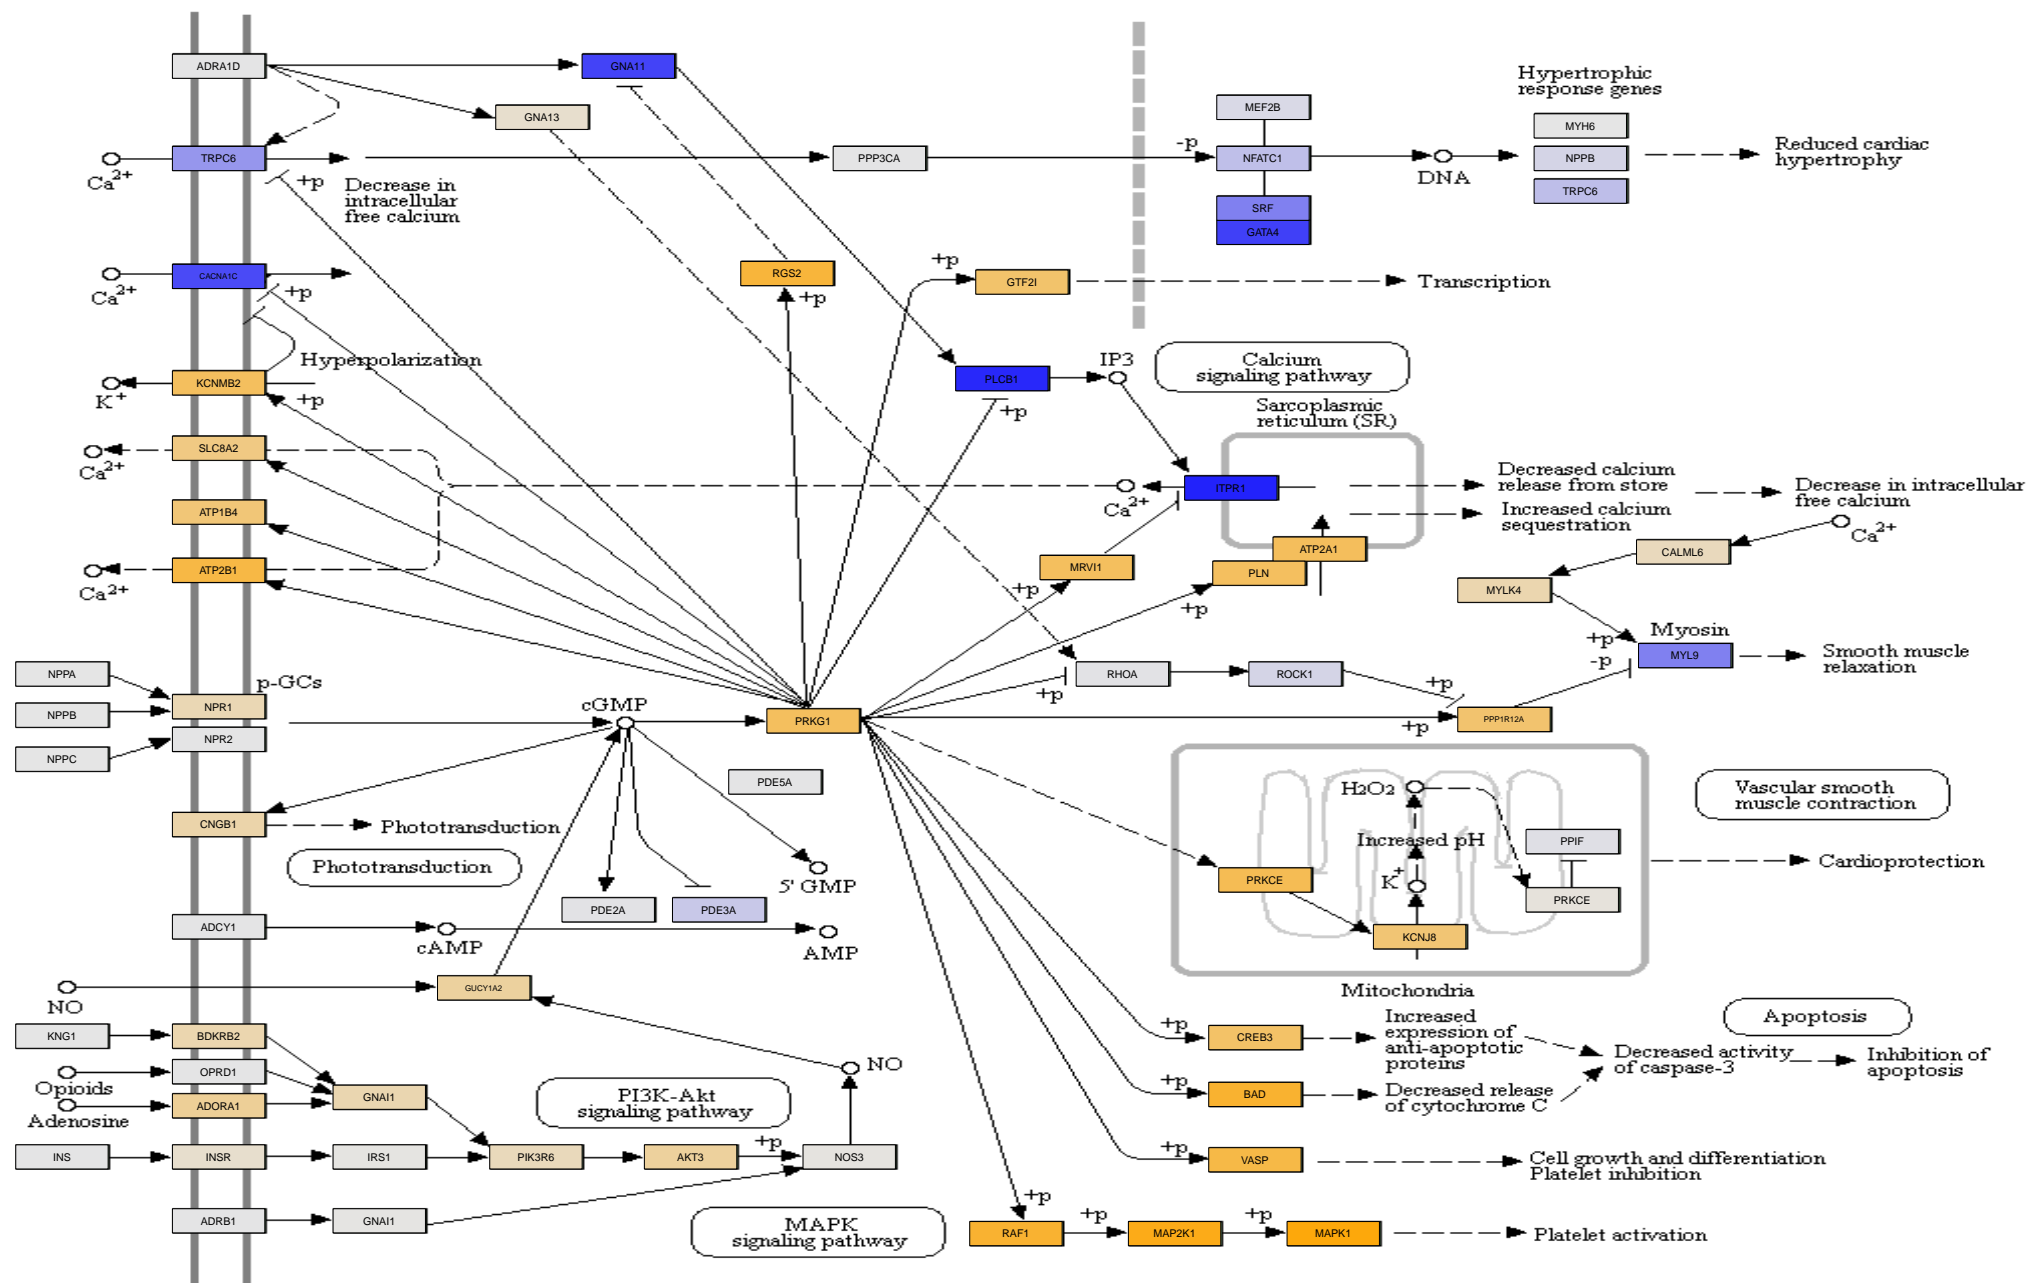

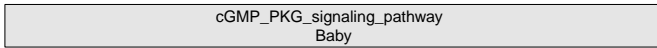

cGMP\_PKG\_signaling\_pathway  
Infant

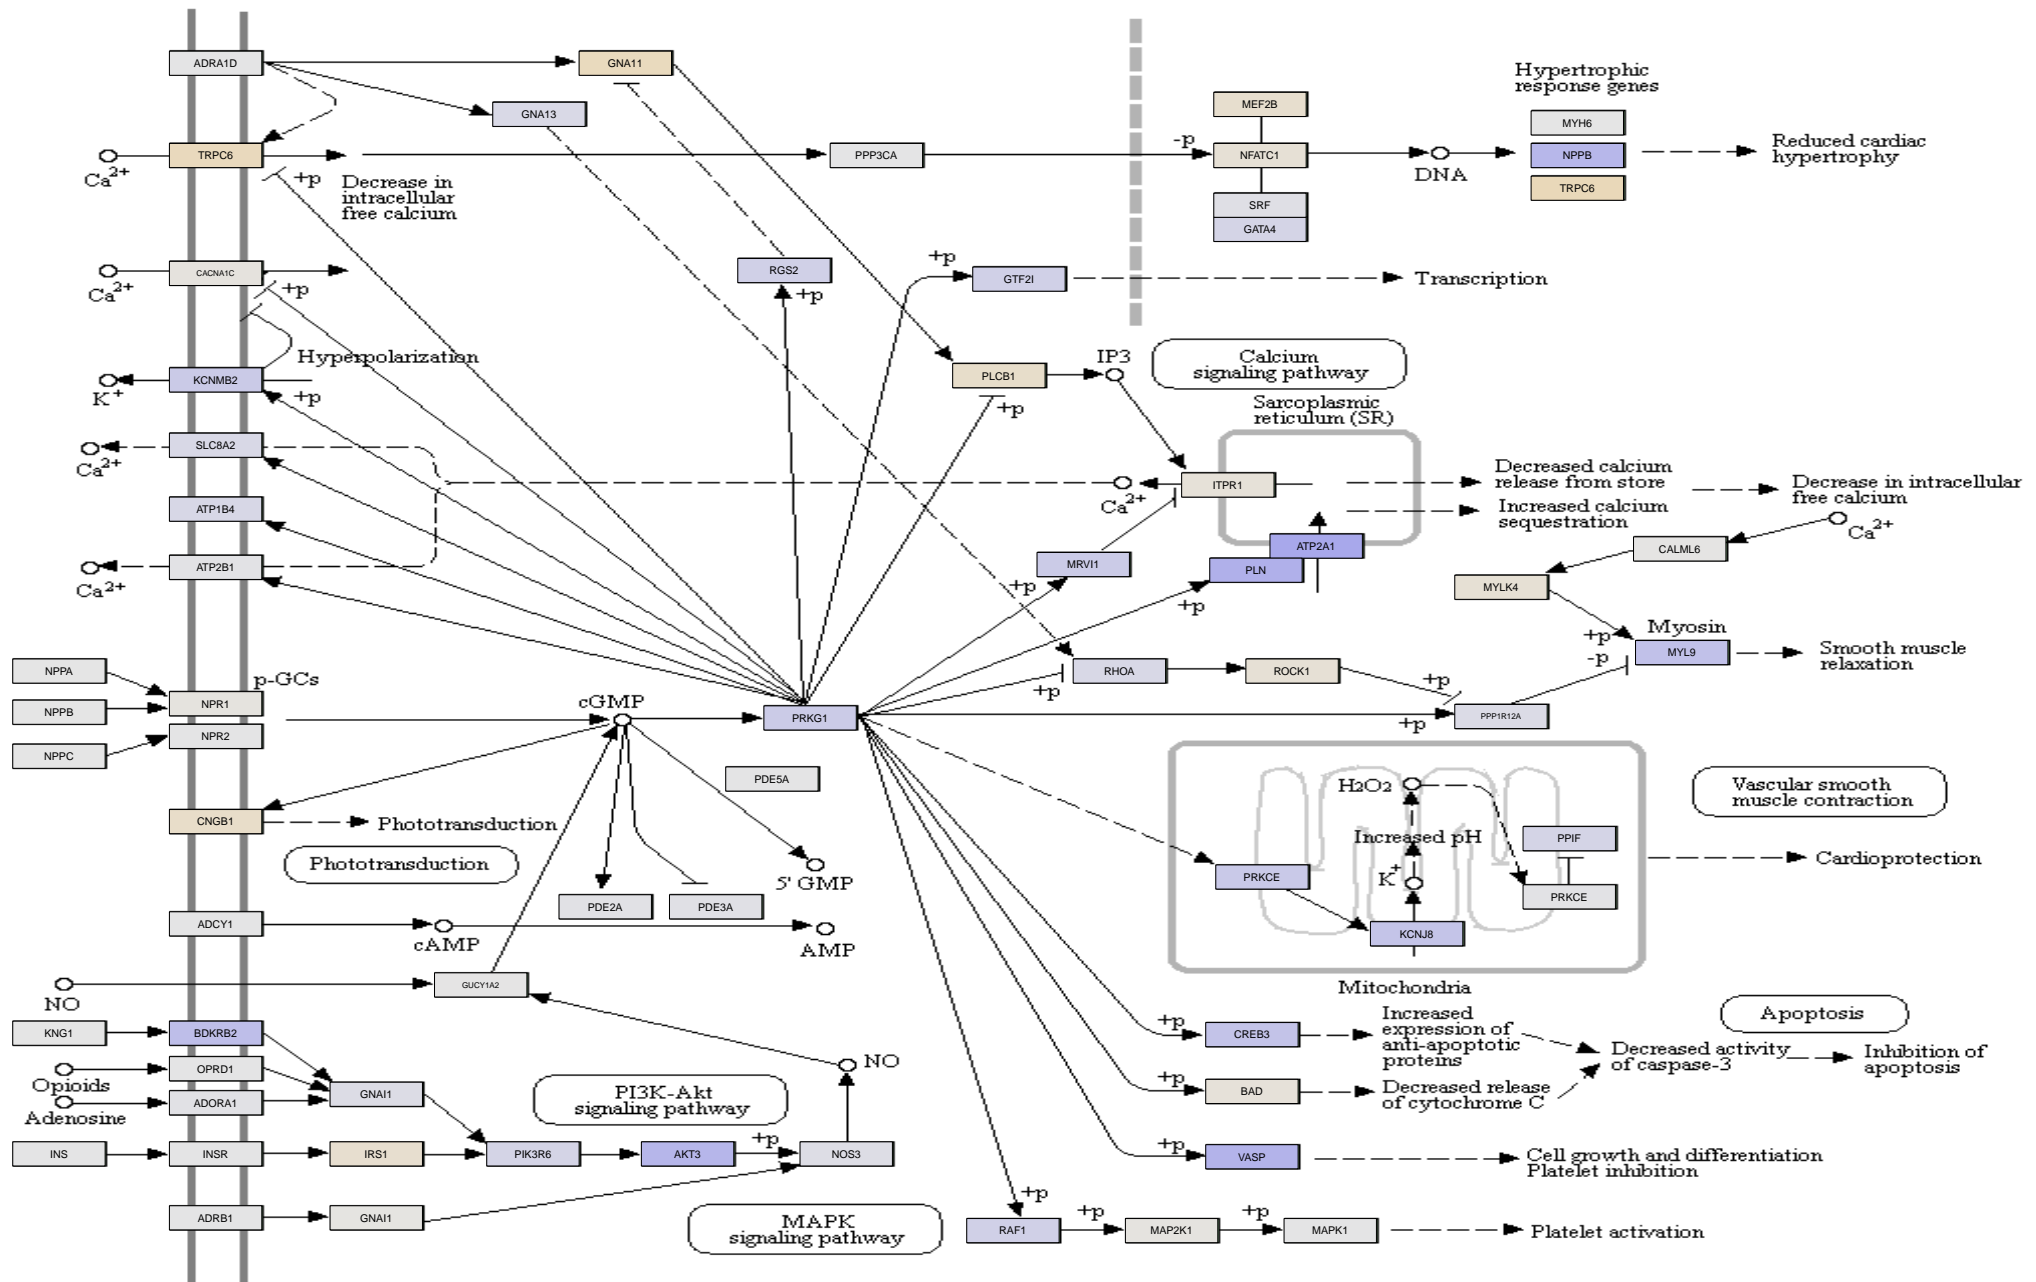

cGMP\_PKG\_signaling\_pathway  
Teenager

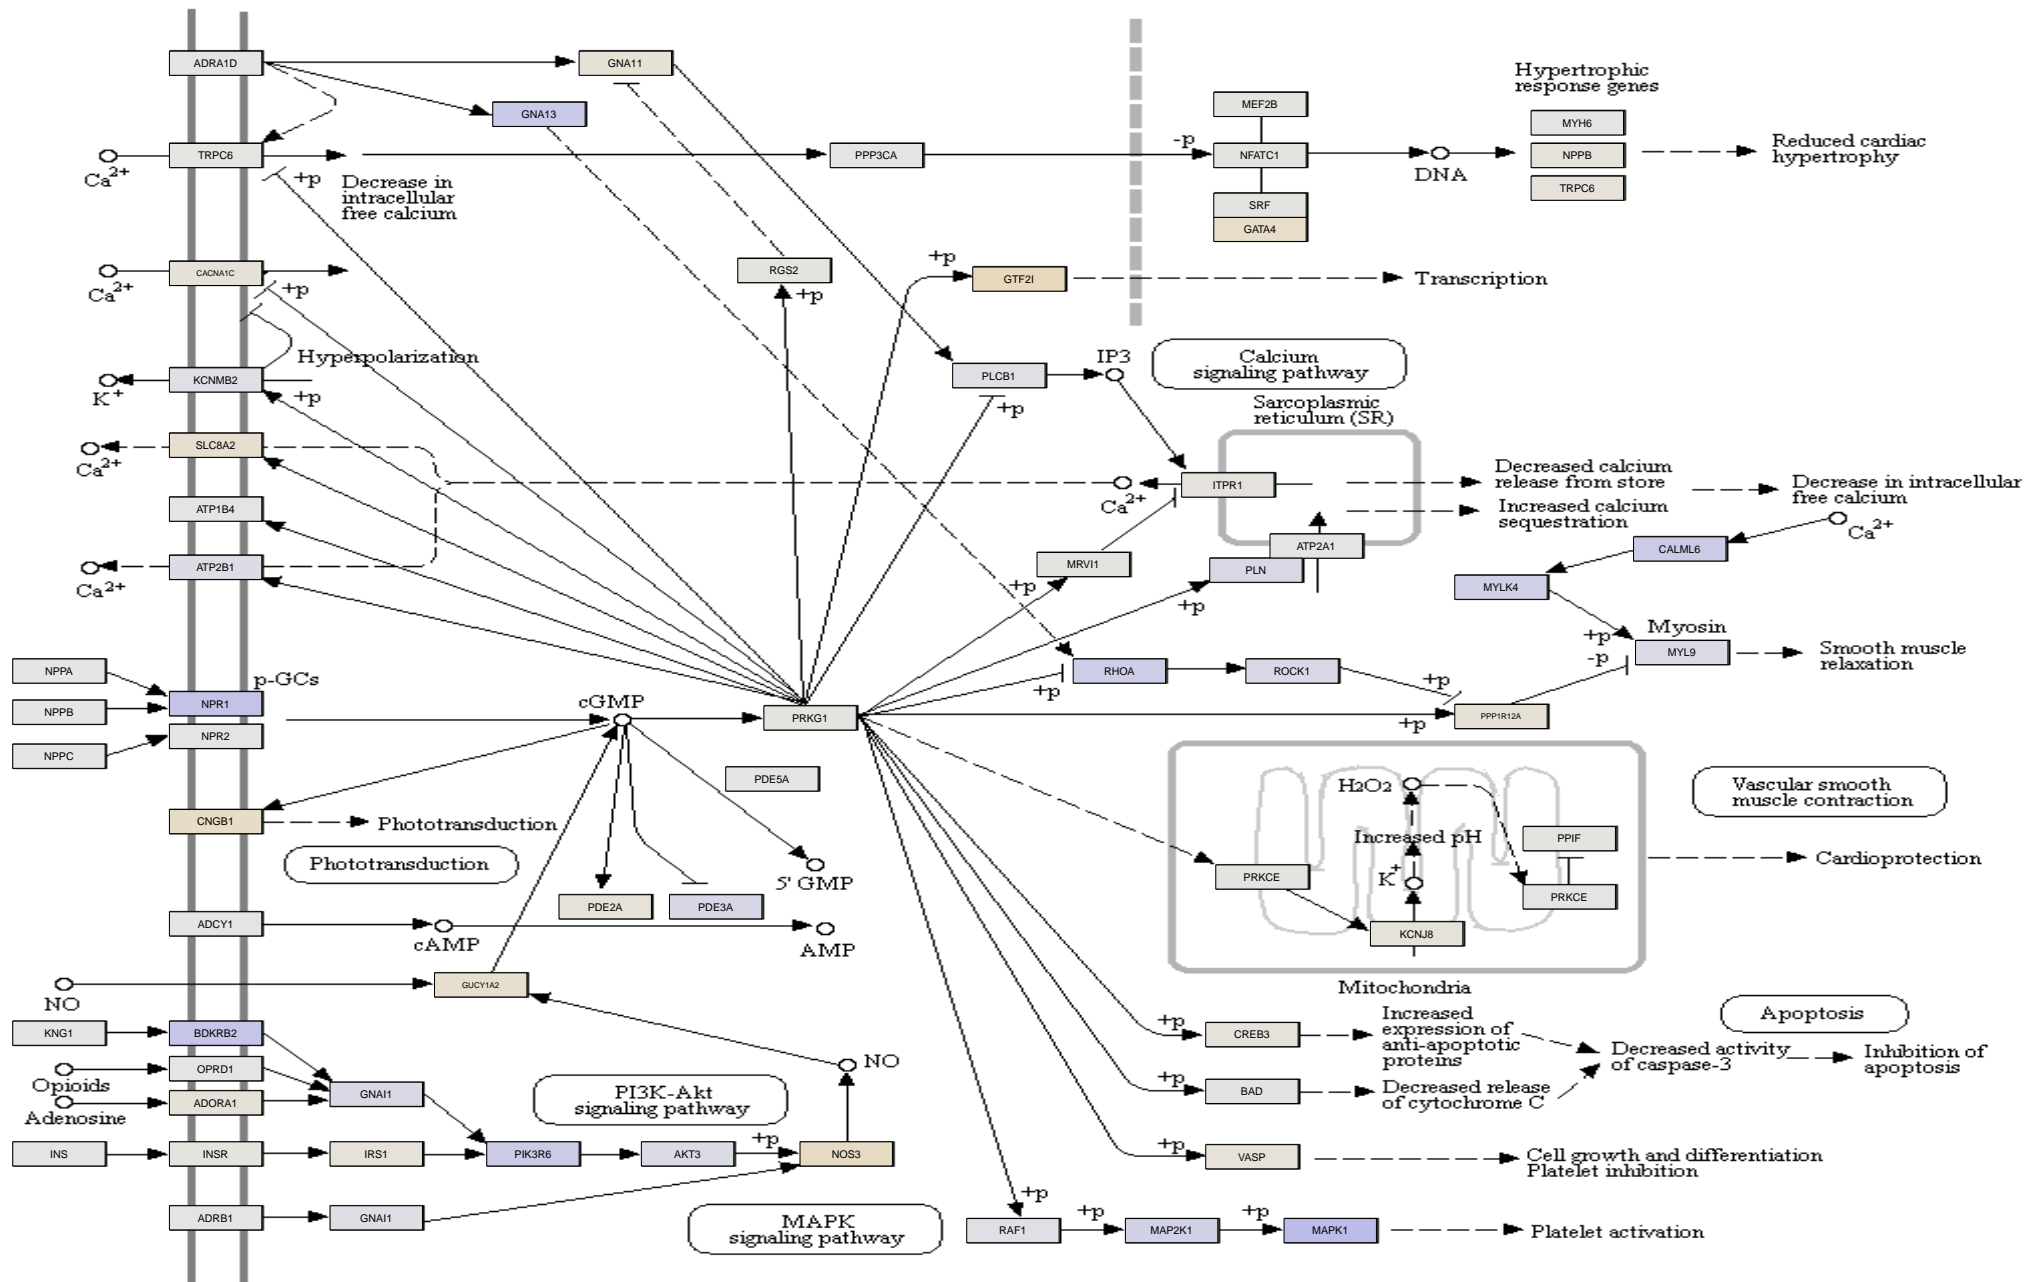



cGMP\_PKG\_signaling\_pathway  
Adult

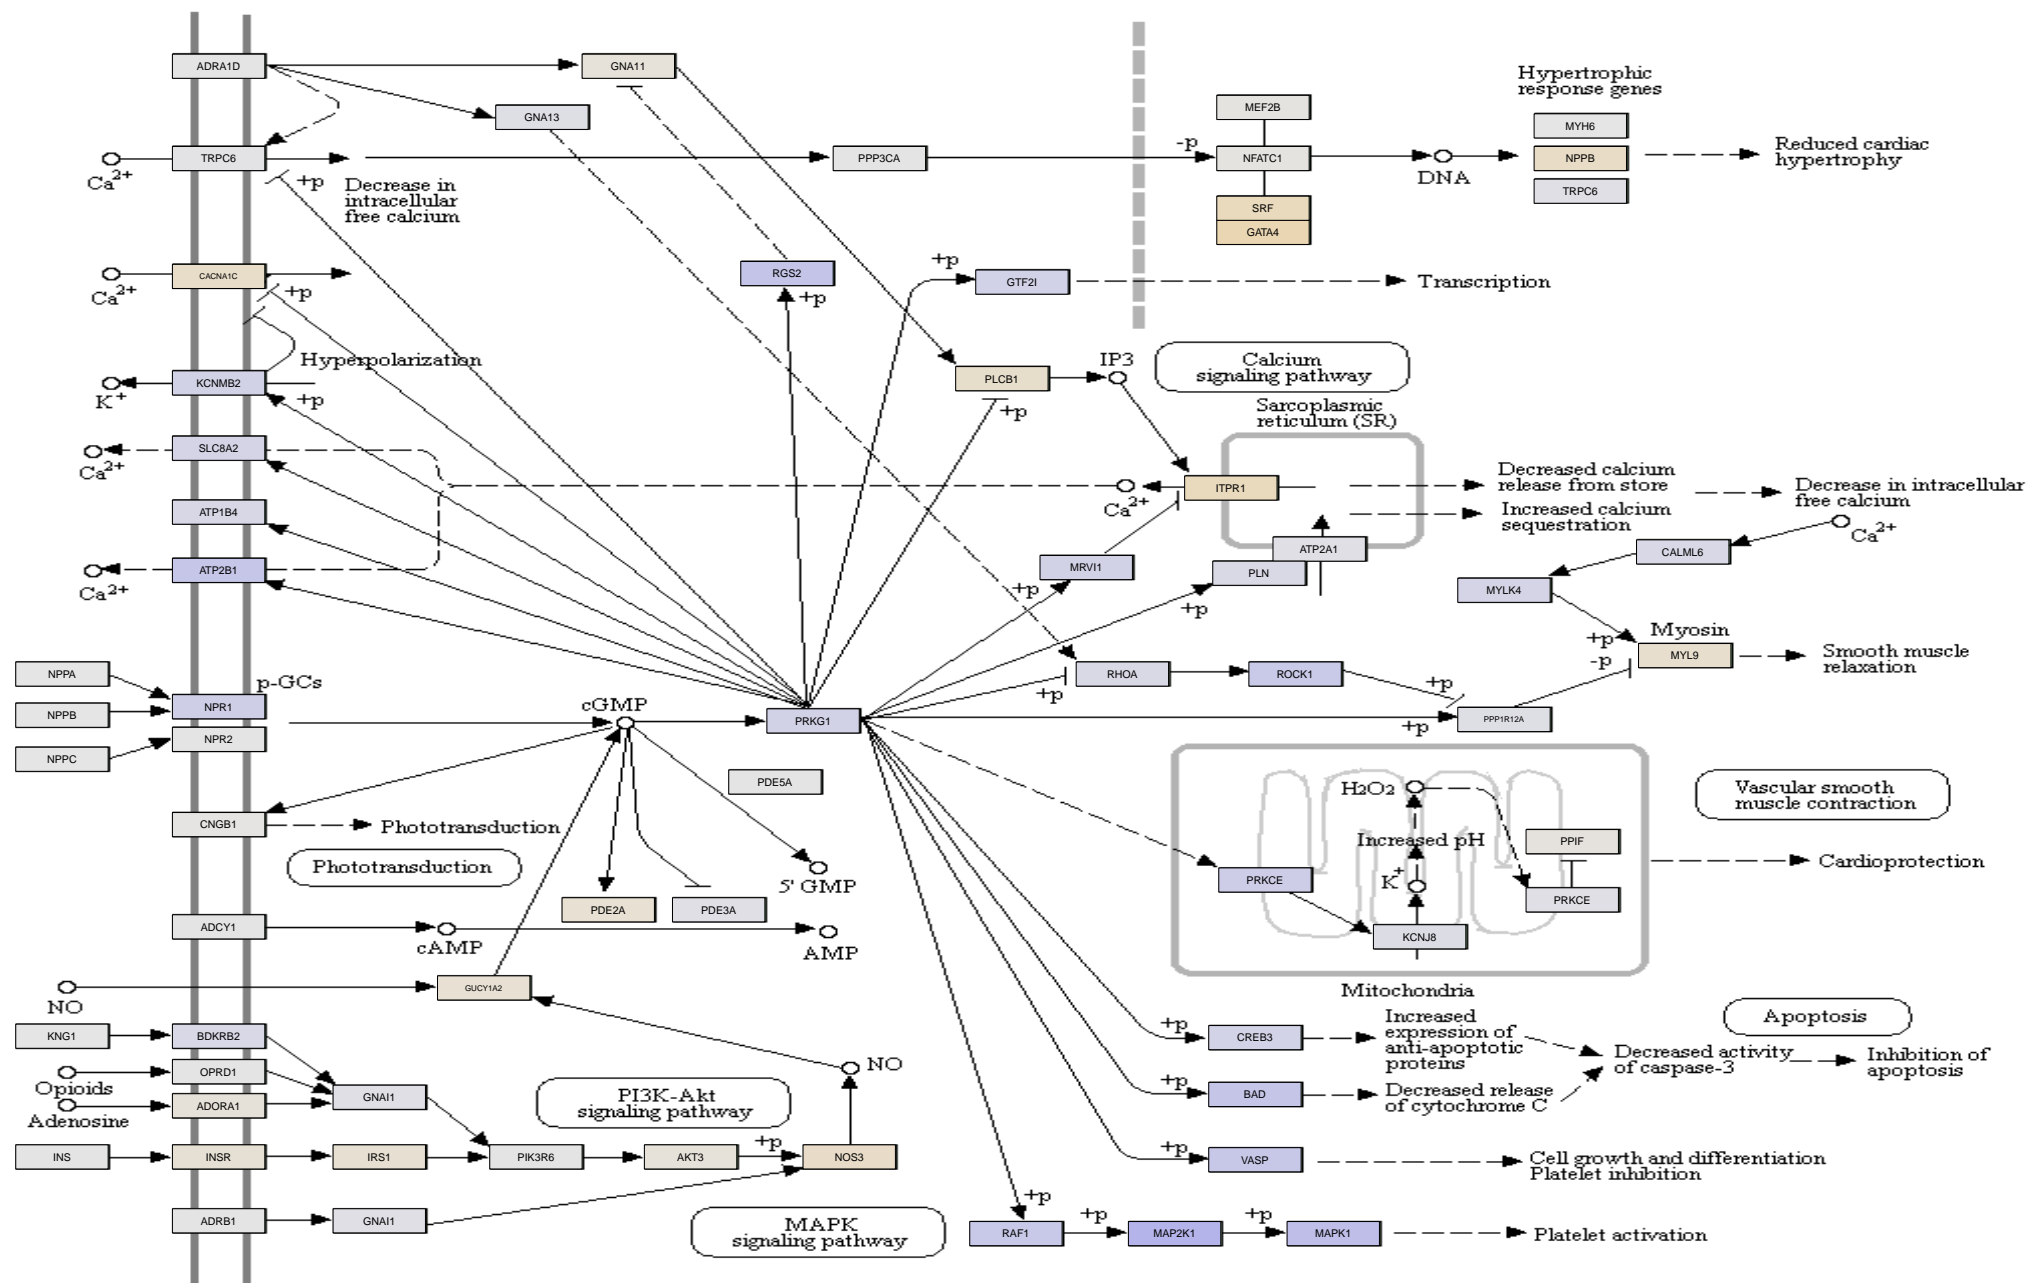

cGMP\_PKG\_signaling\_pathway  
Late adult

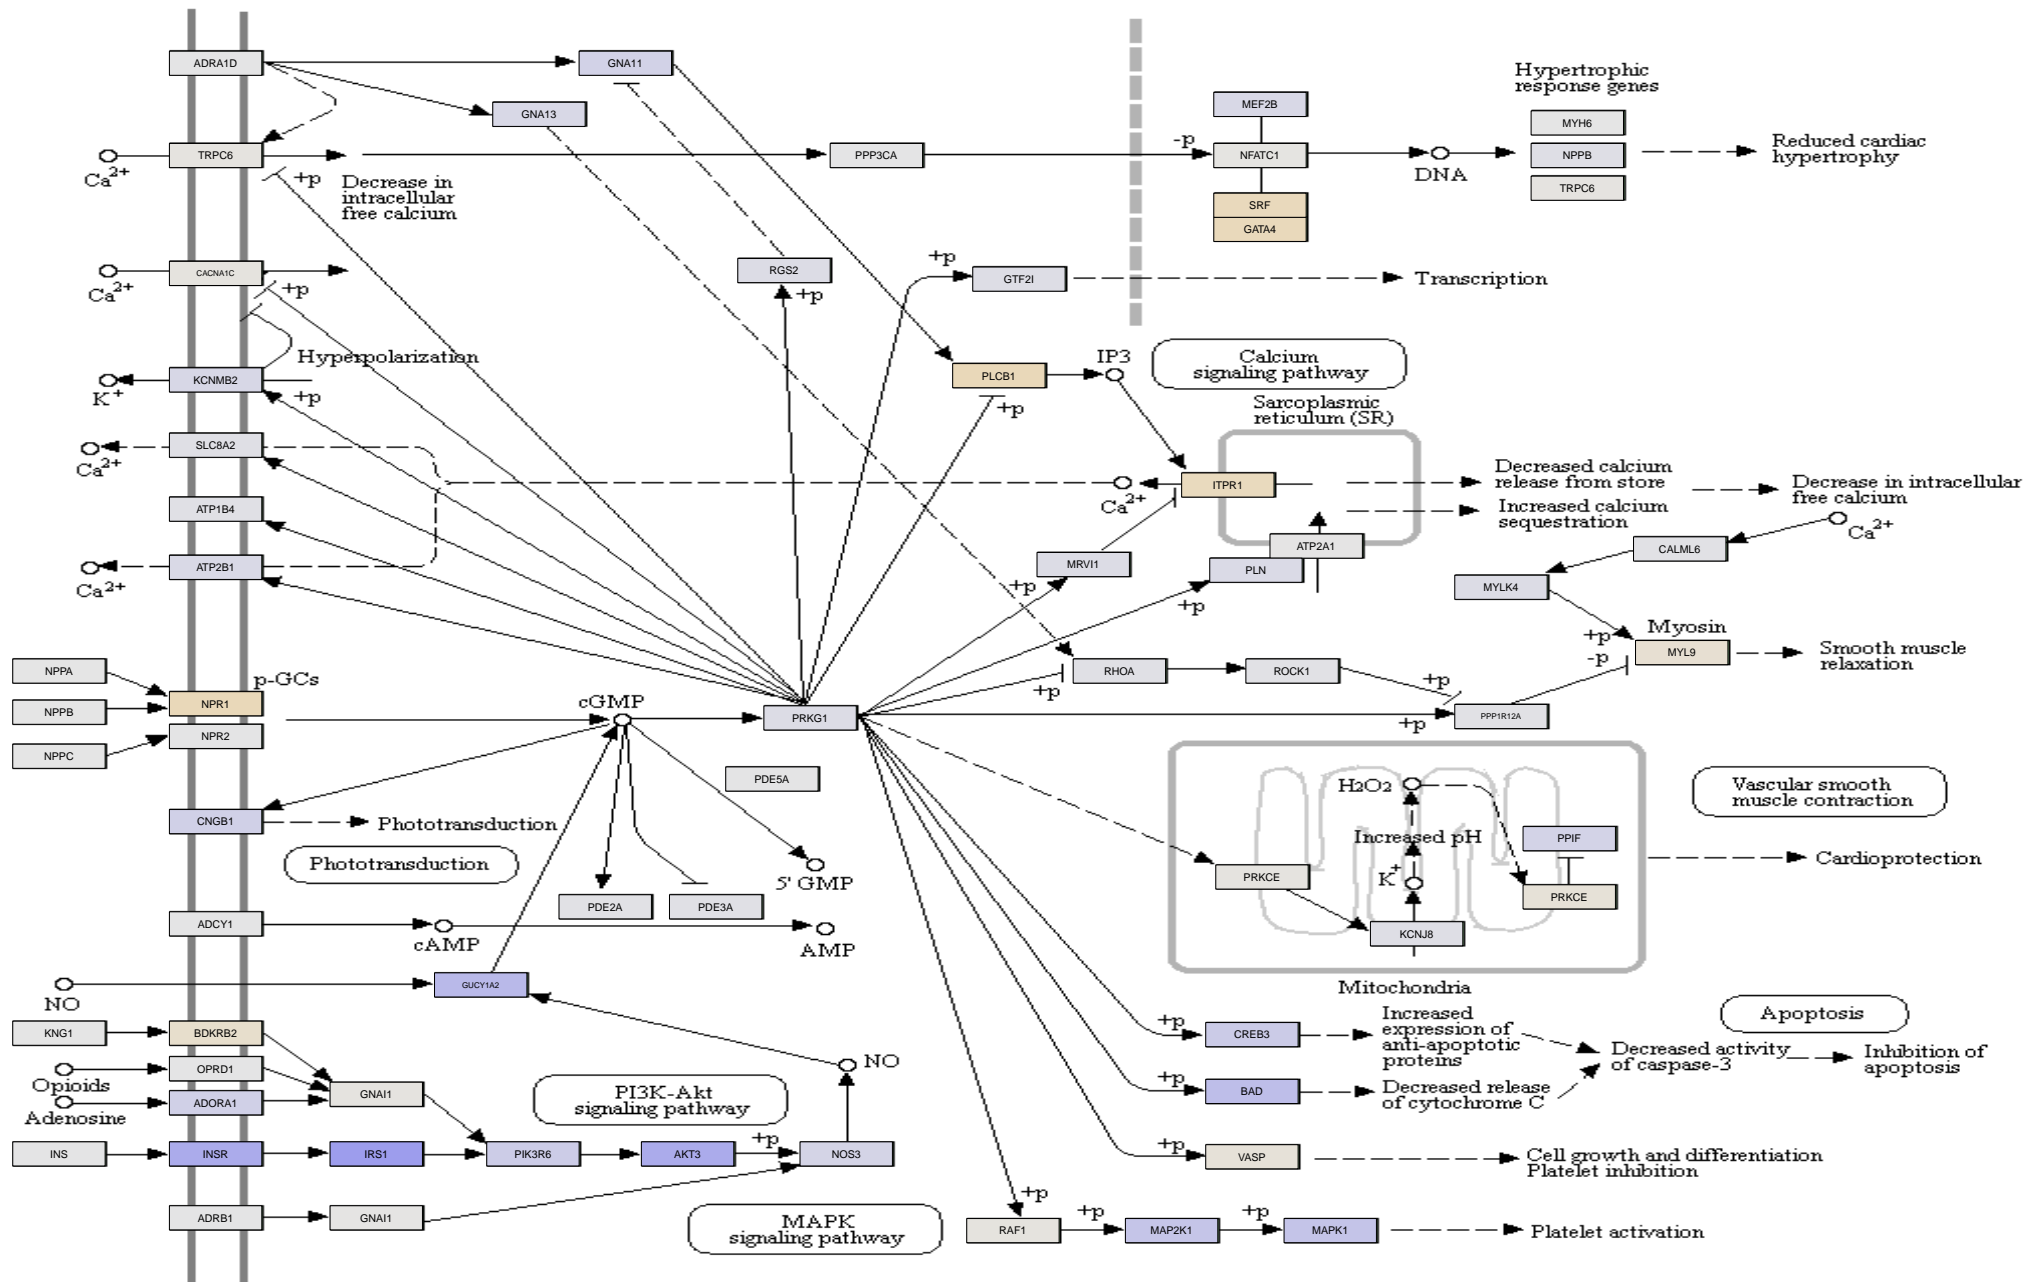

Supplement: s1 [file s1]
