# Supplementary material for: The Transcriptome and Methylome of the Developing and Aging Brain and Their Relations to Gliomas and Psychological Disorders
Source: MDPI journal article supplement (doi:10.3390/cells11030362), 2022-01-21

AMPK signaling pathway

all genes

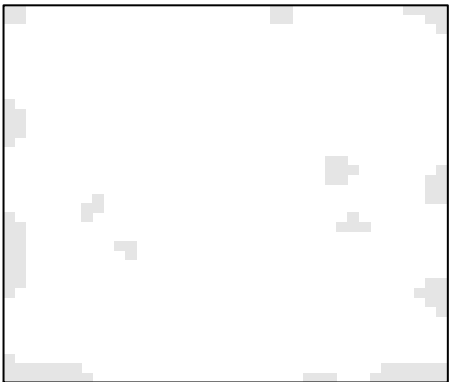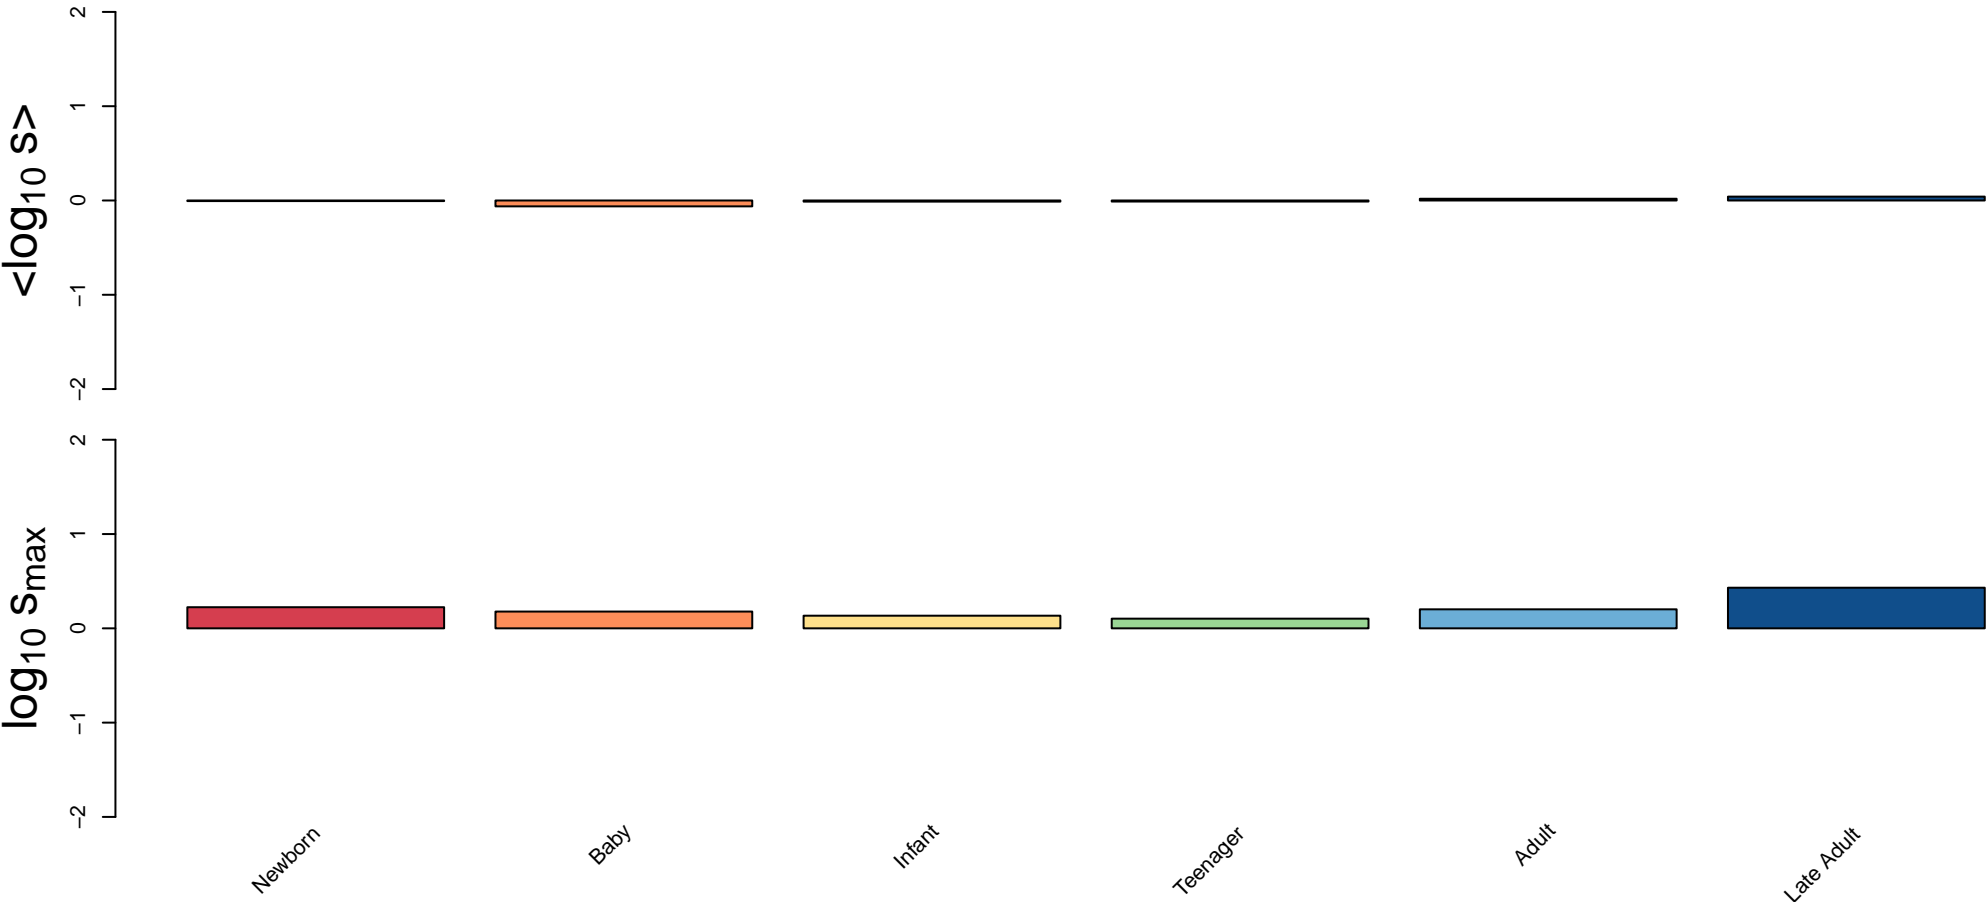

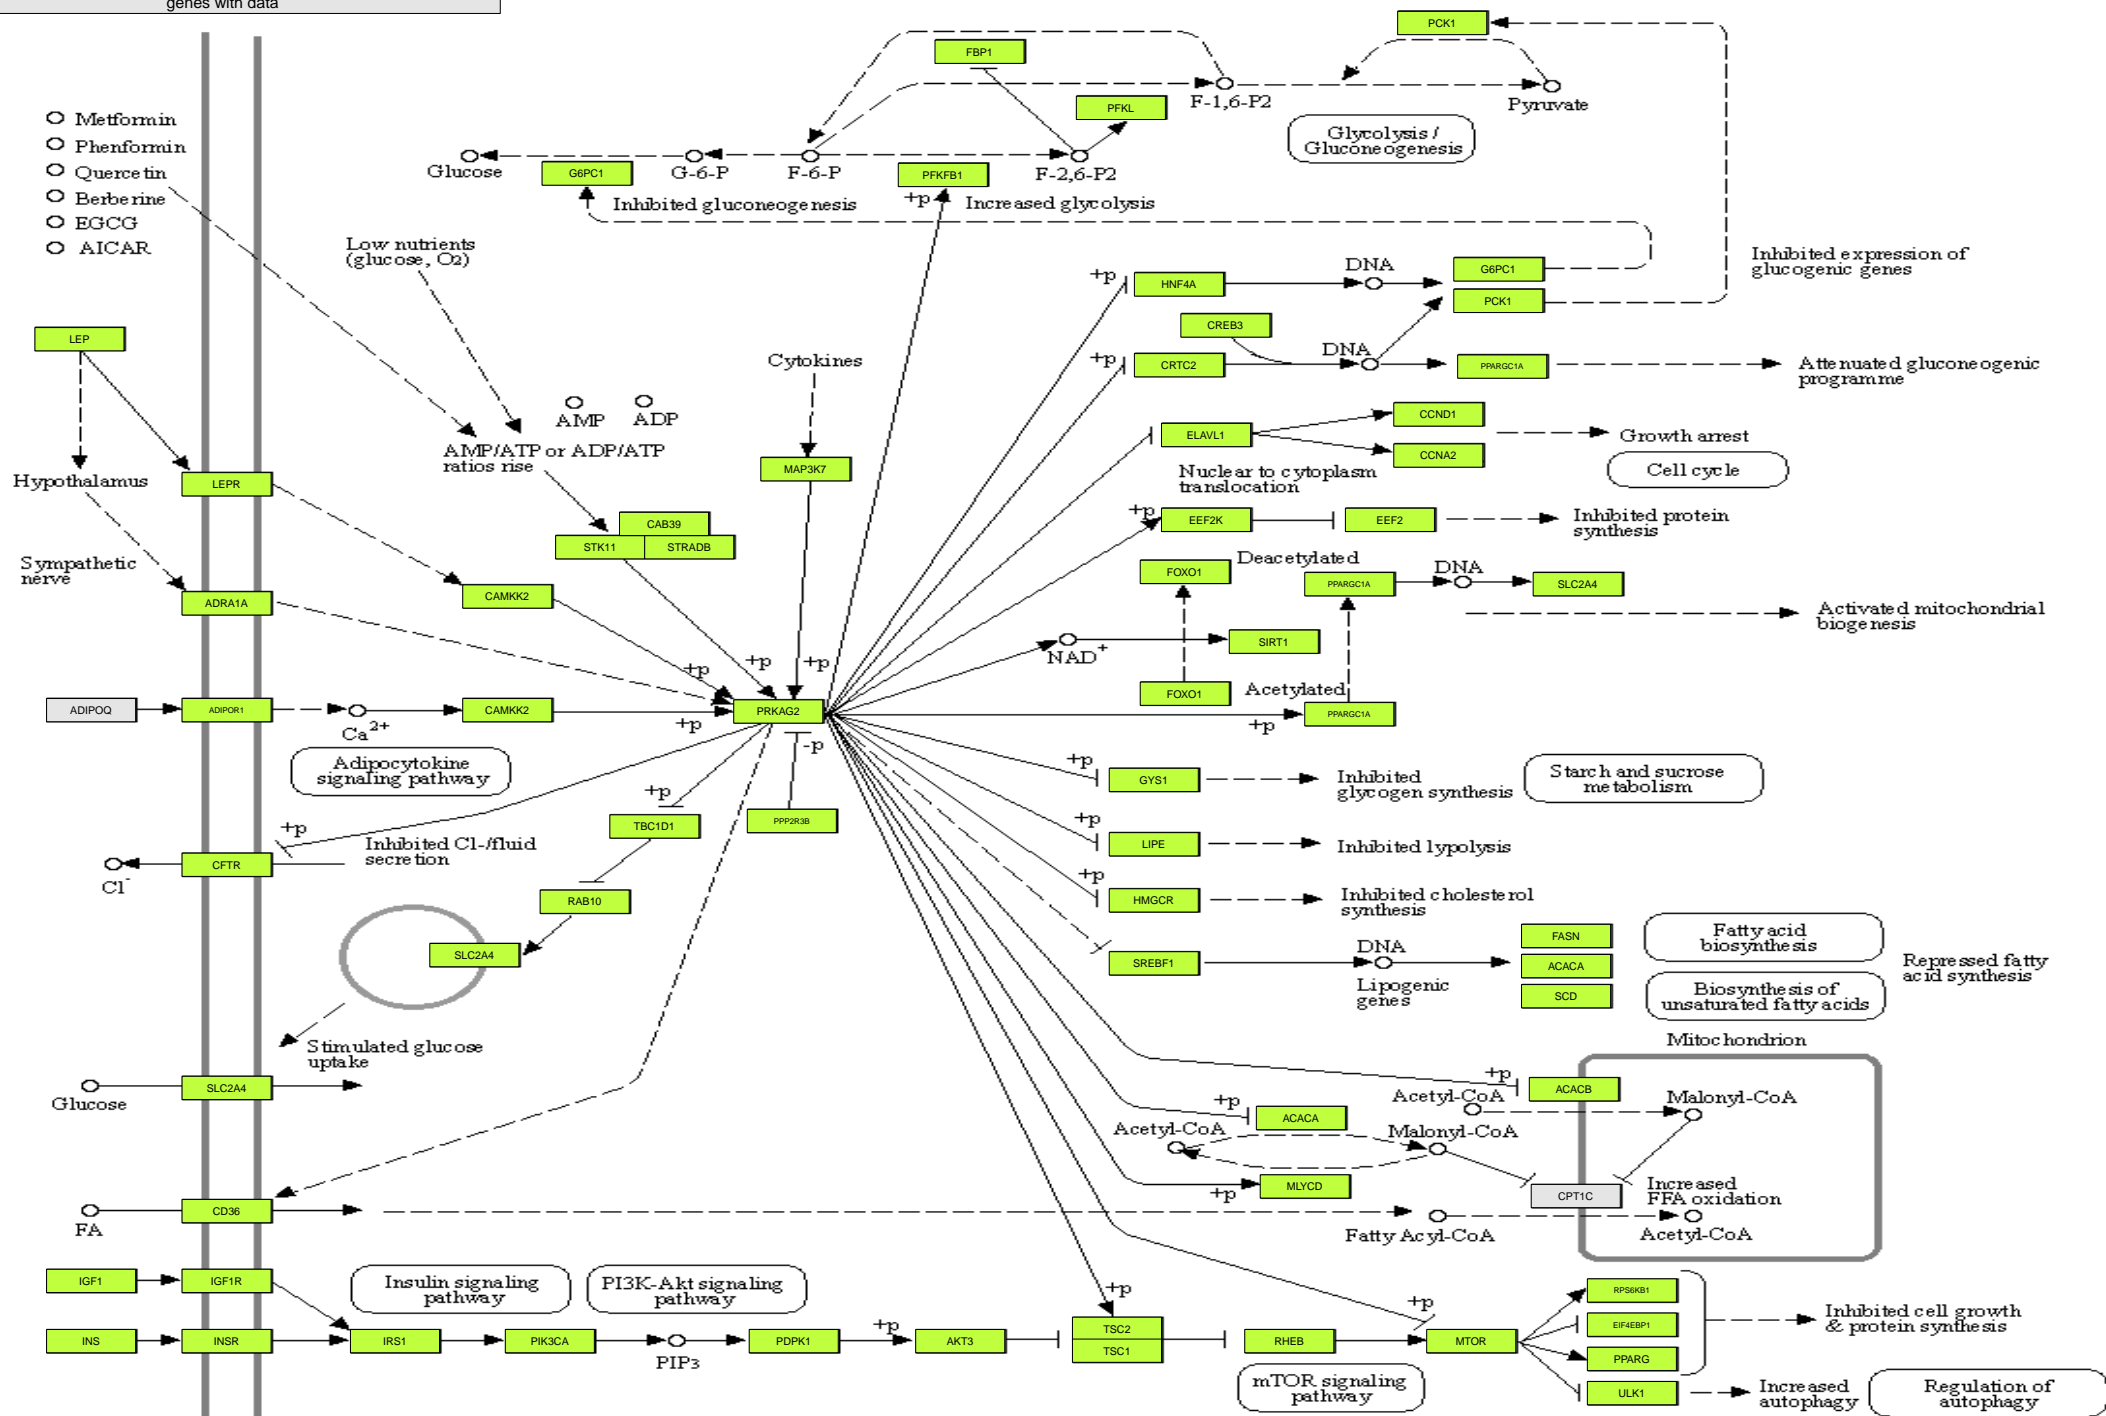

AMPK\_signaling\_pathway  
sink nodes

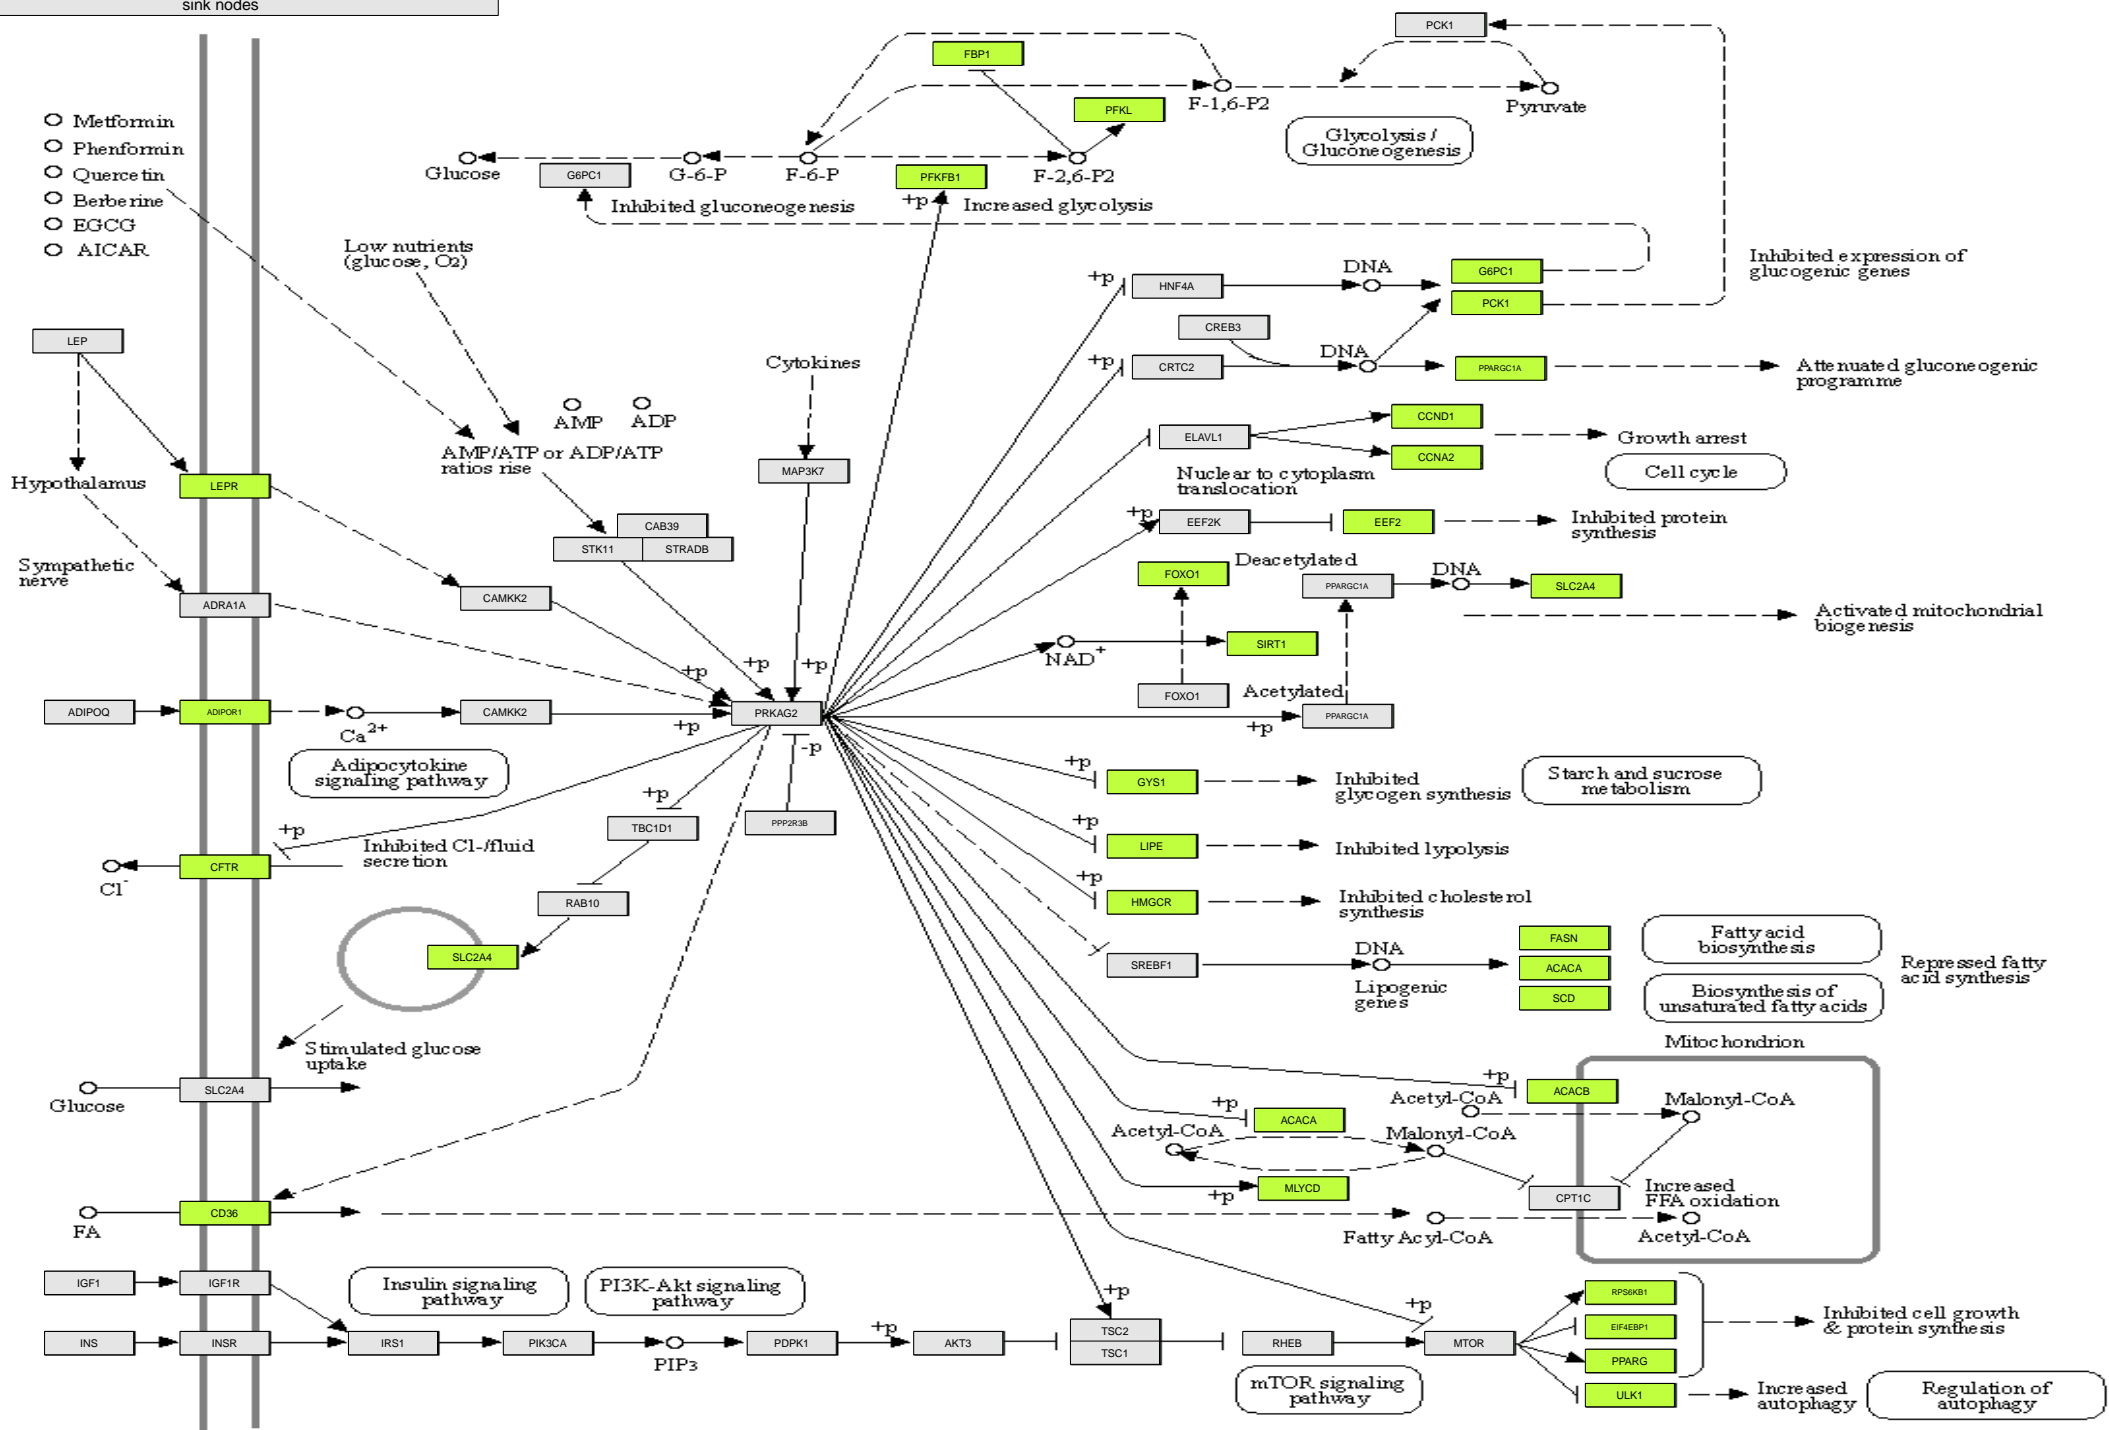

# AMPK signaling pathway Newborn

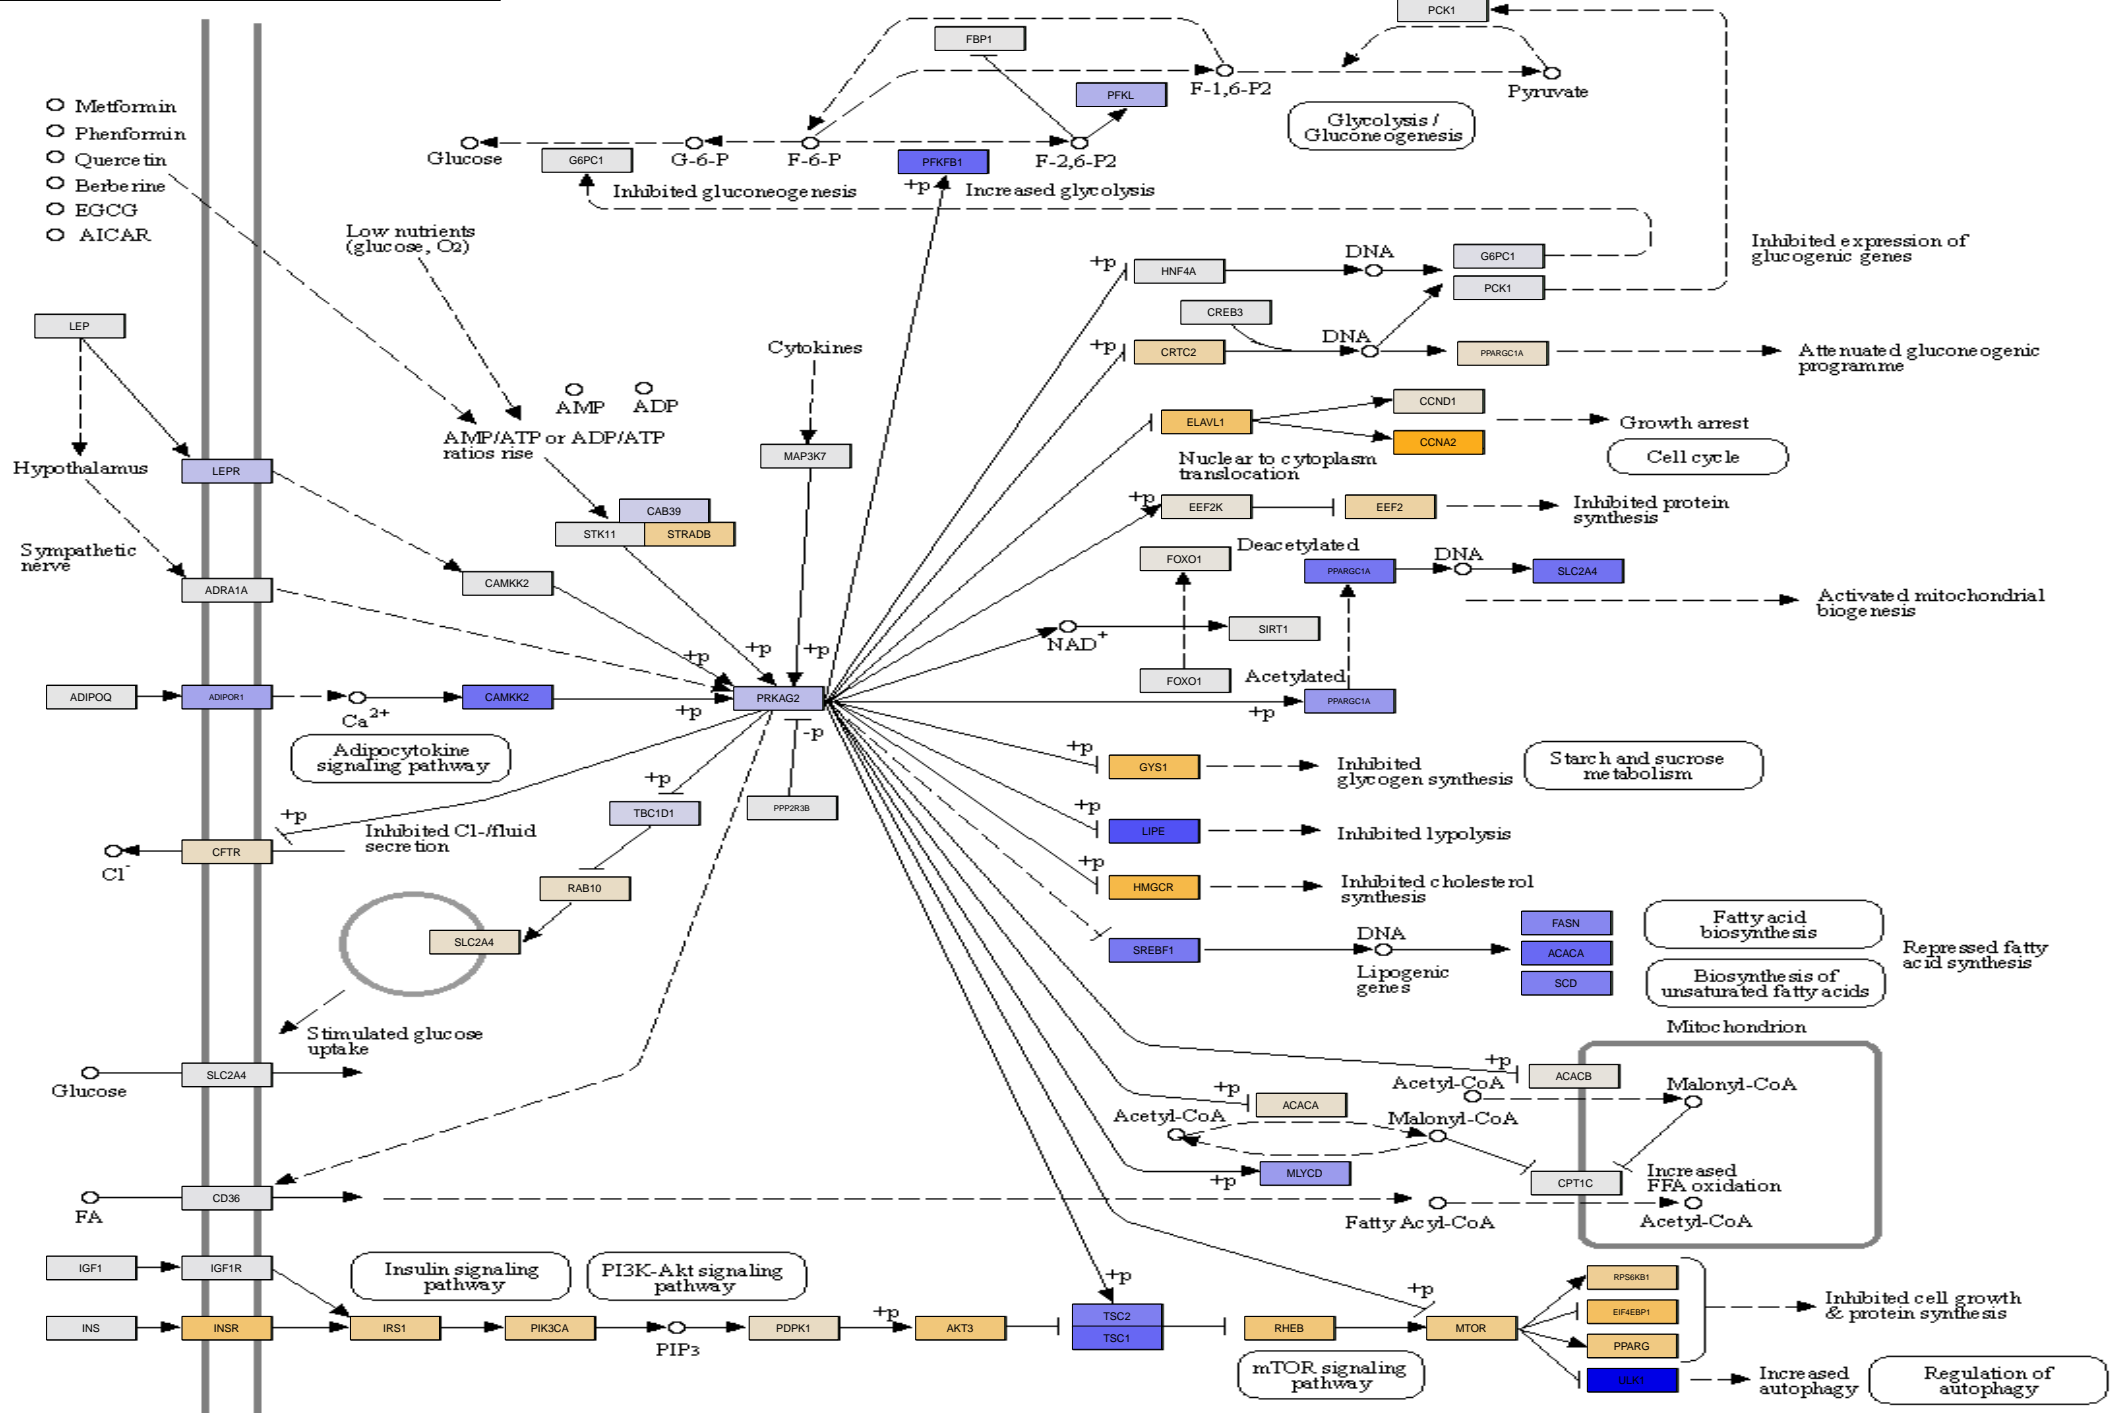

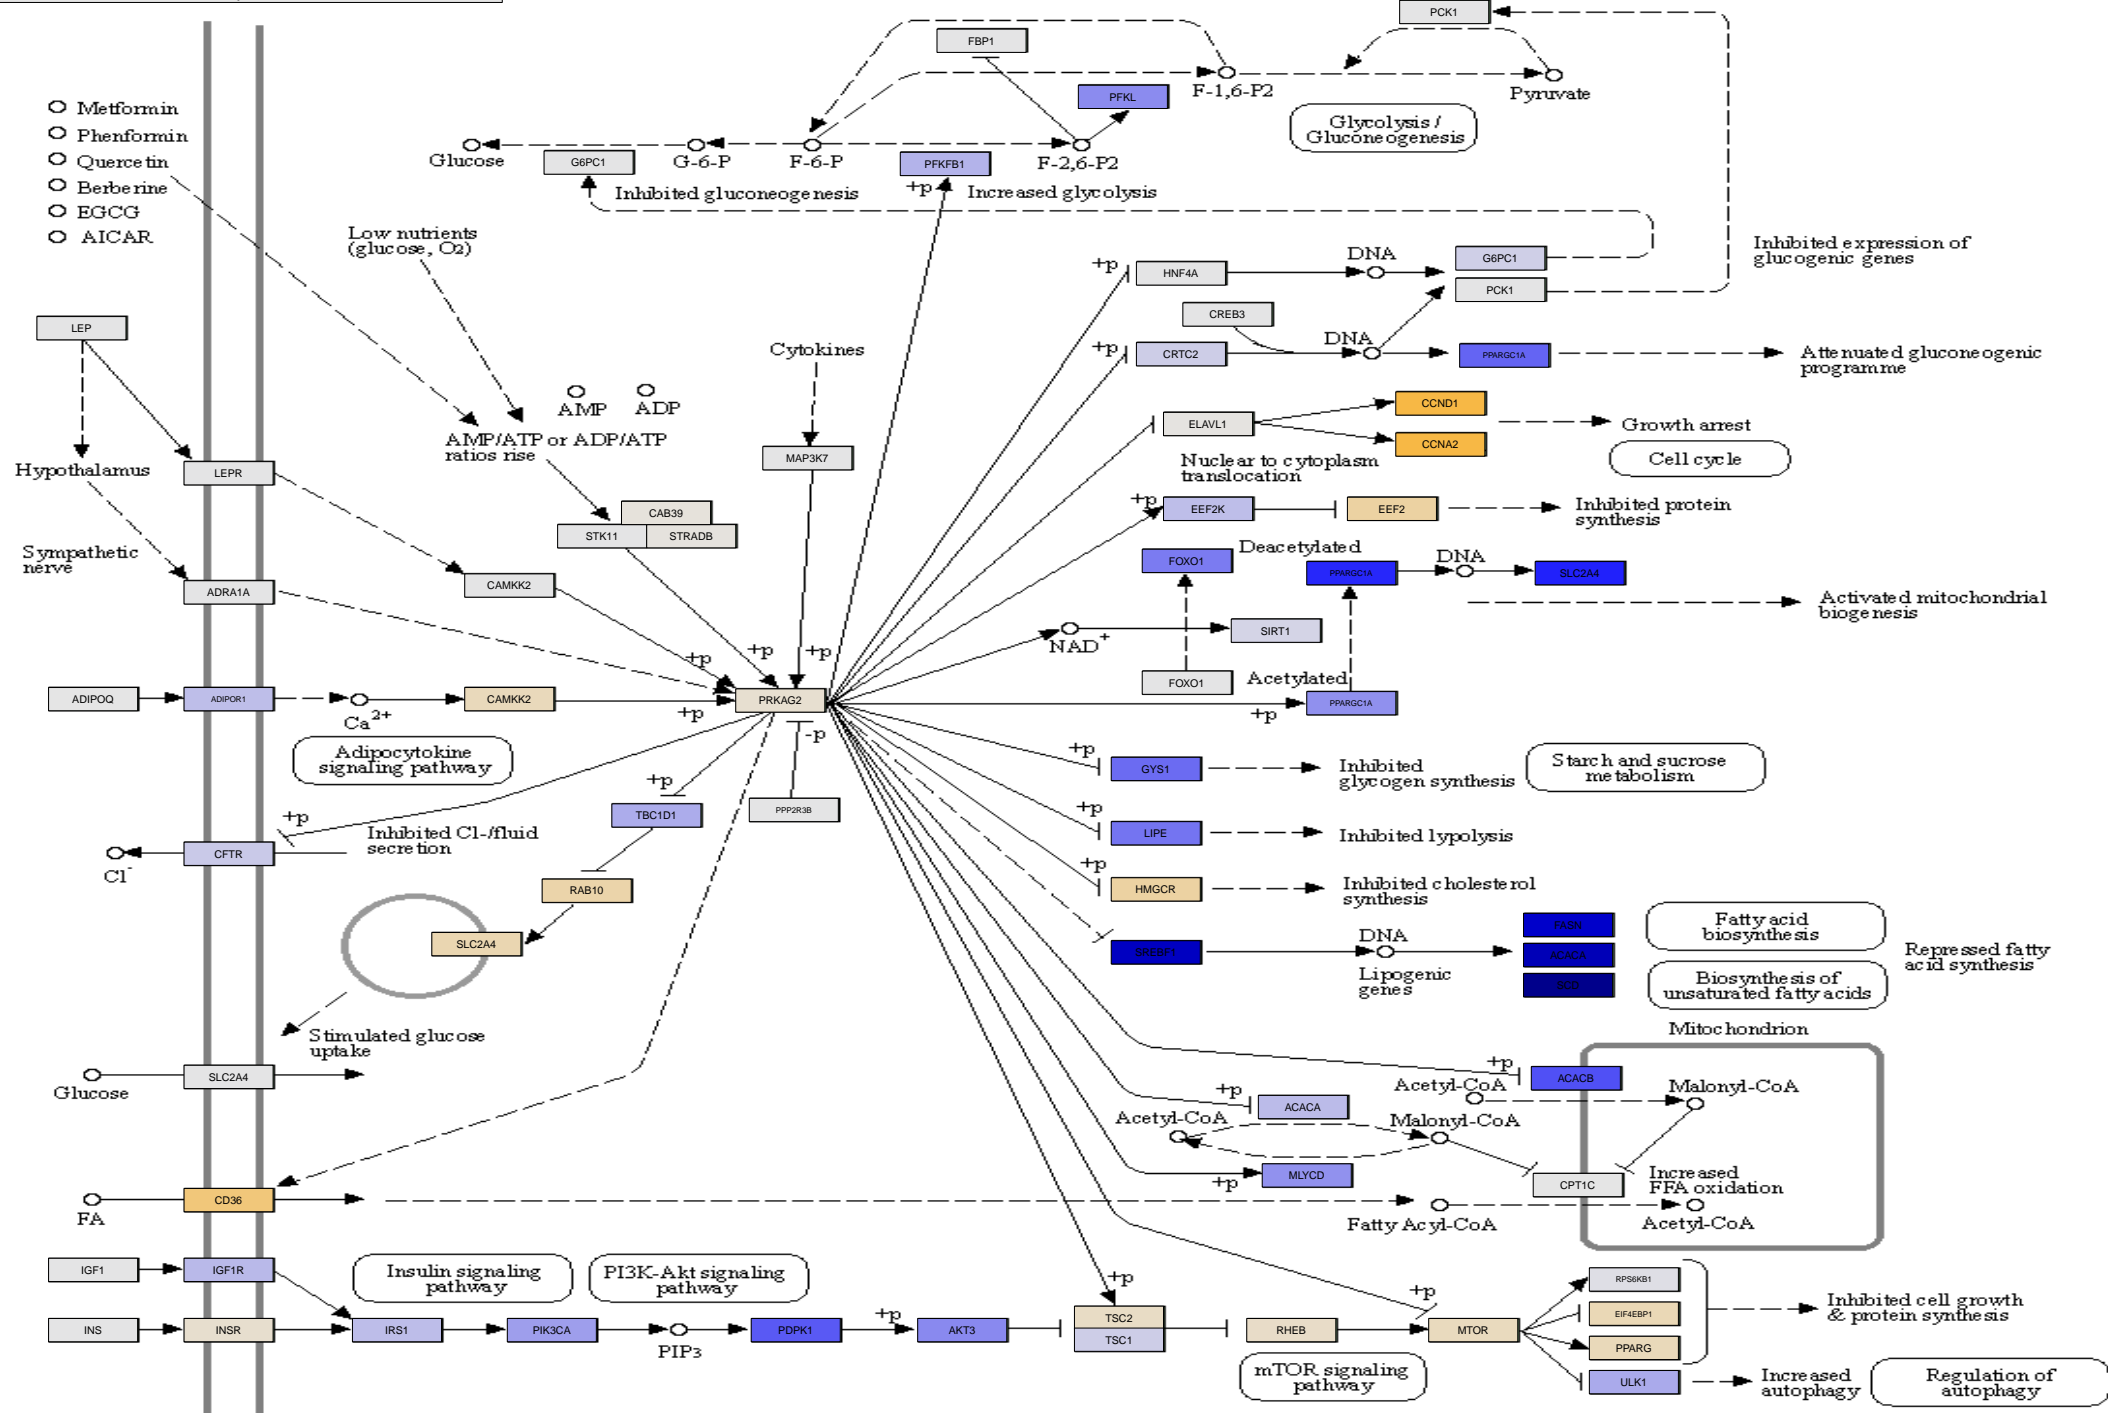

# AMPK\_signaling\_pathway Infant

- Metformin
- Phenformin
- Quercetin
- Berberine
- EGCG
- AICAR

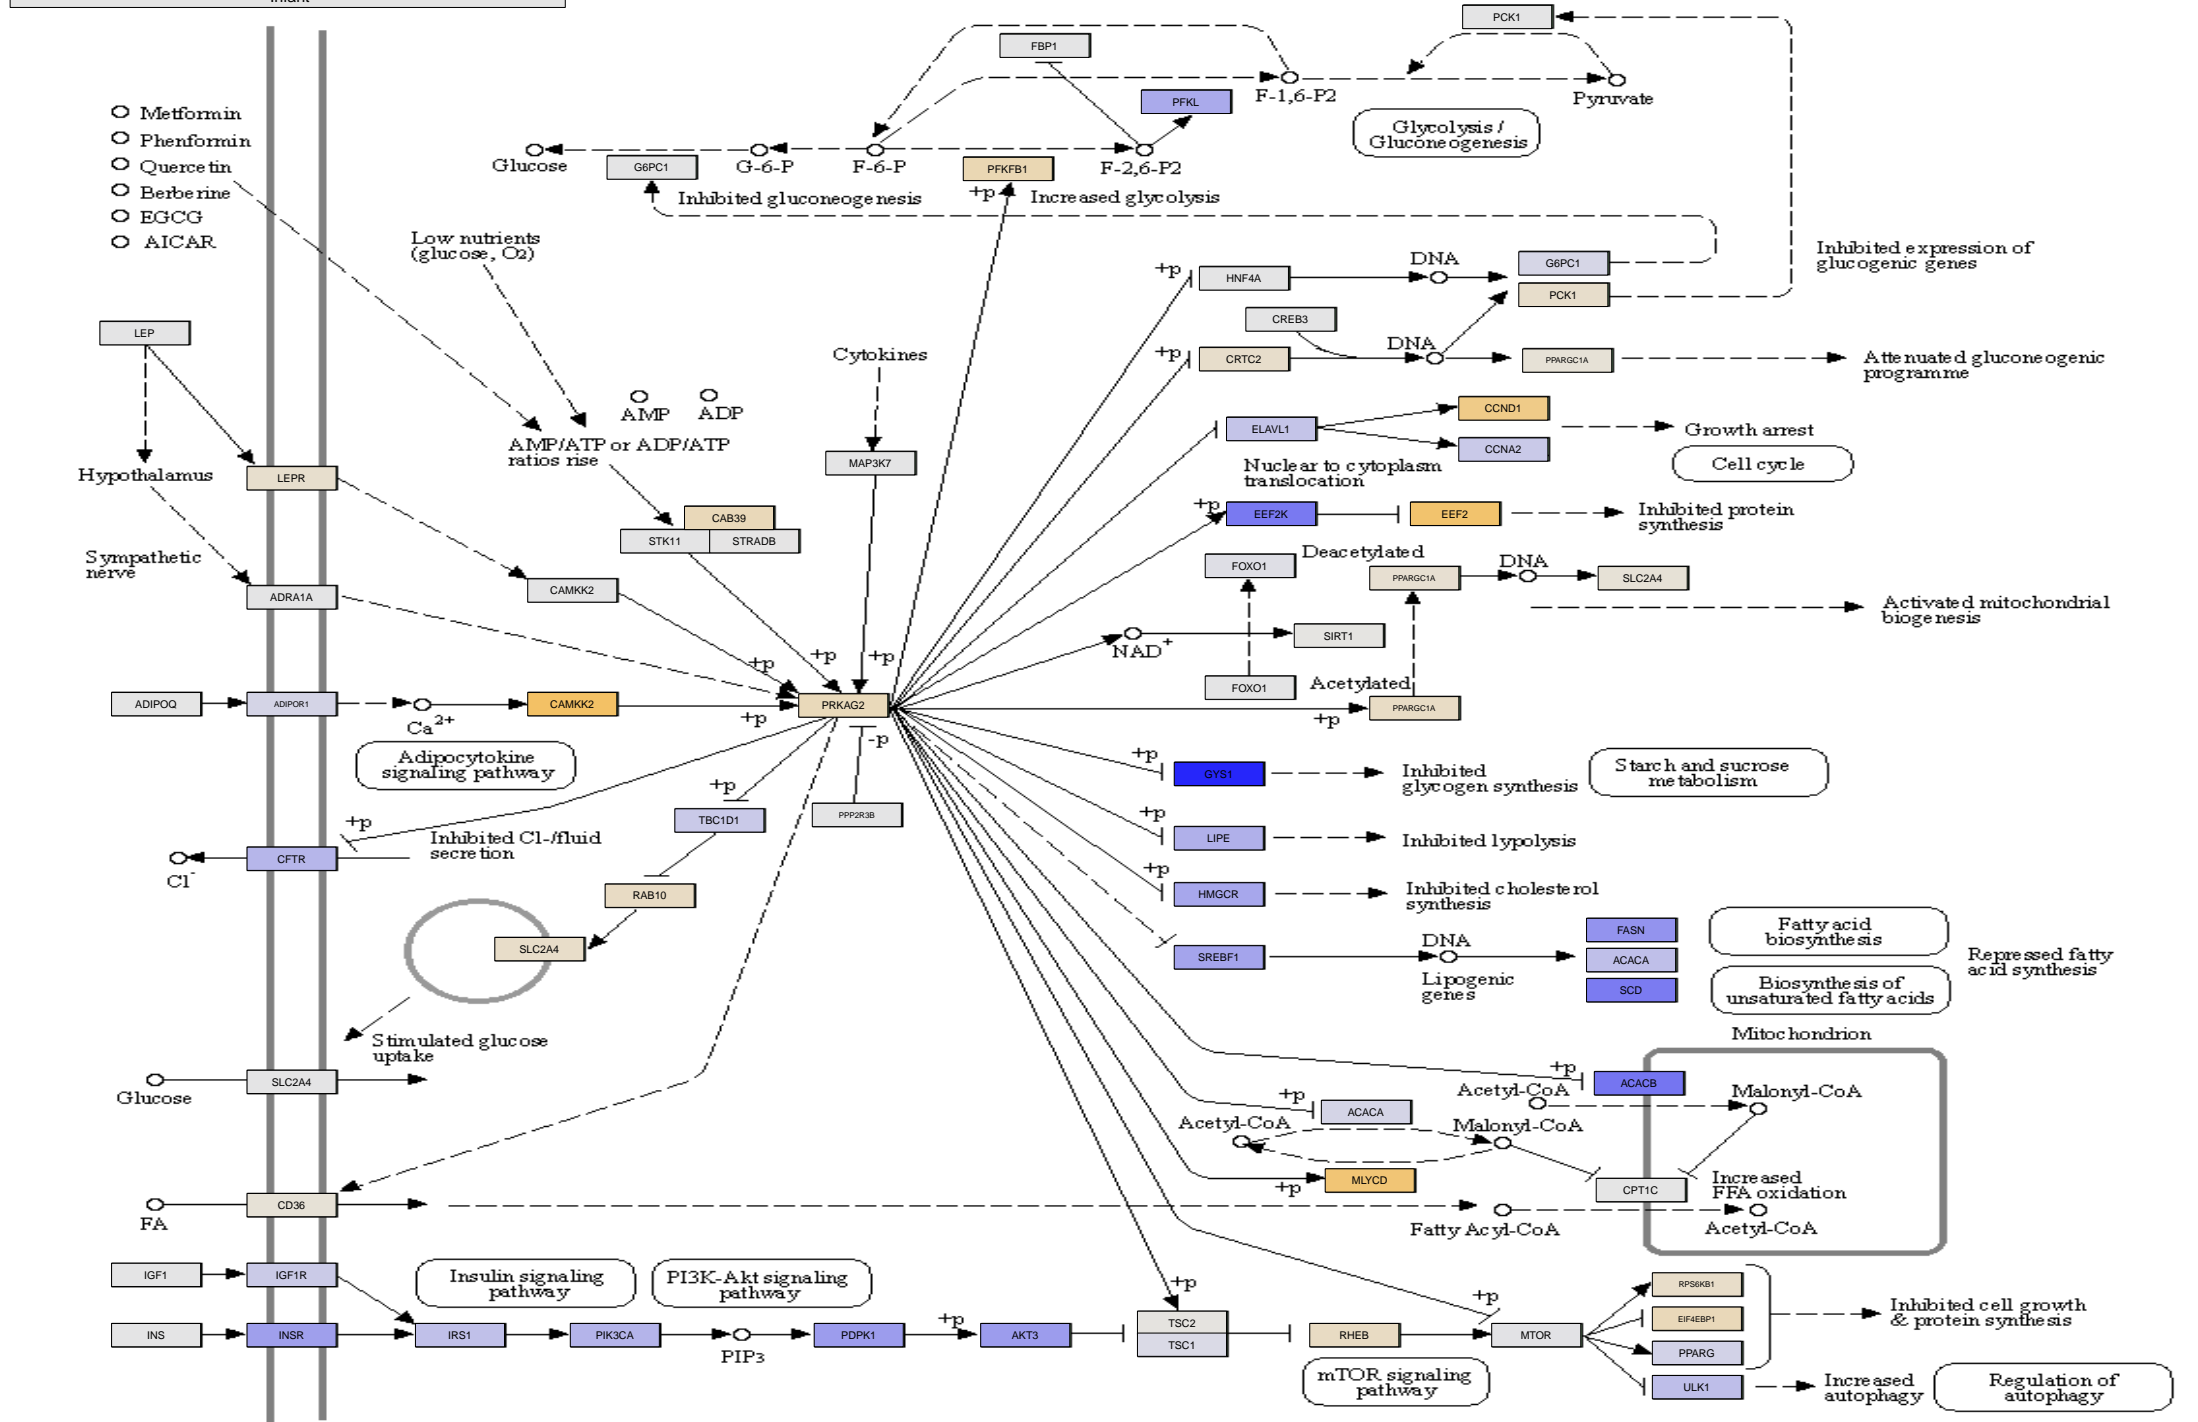

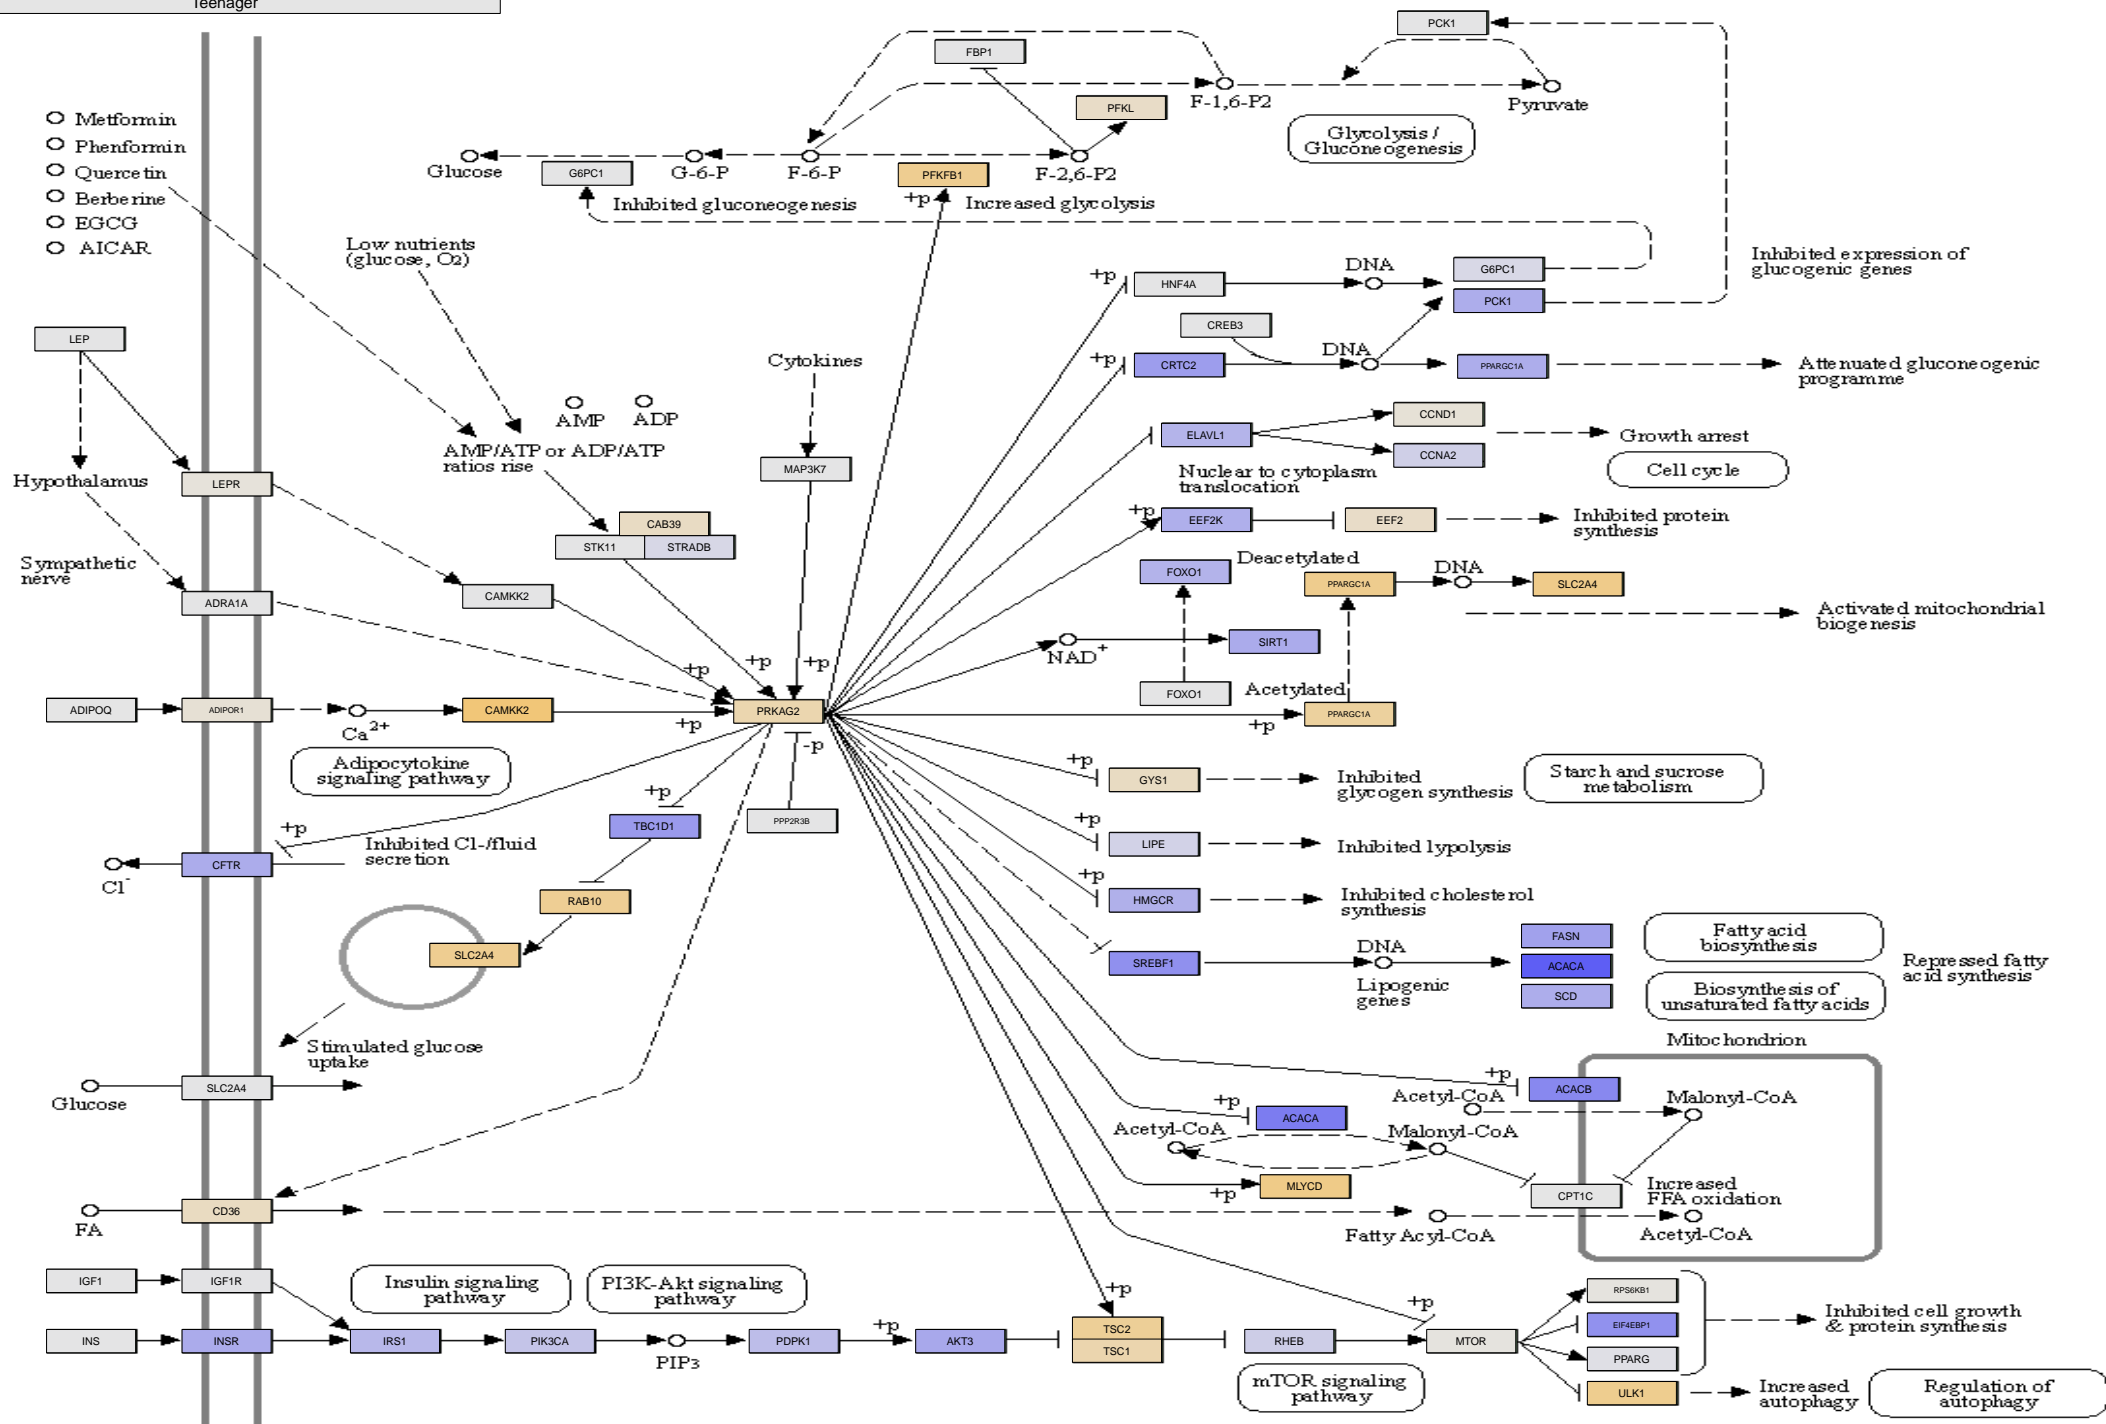

# AMPK\_signaling\_pathway Adult

- Metformin
- Phenformin
- Quercetin
- Berberine
- EGCG
- AICAR

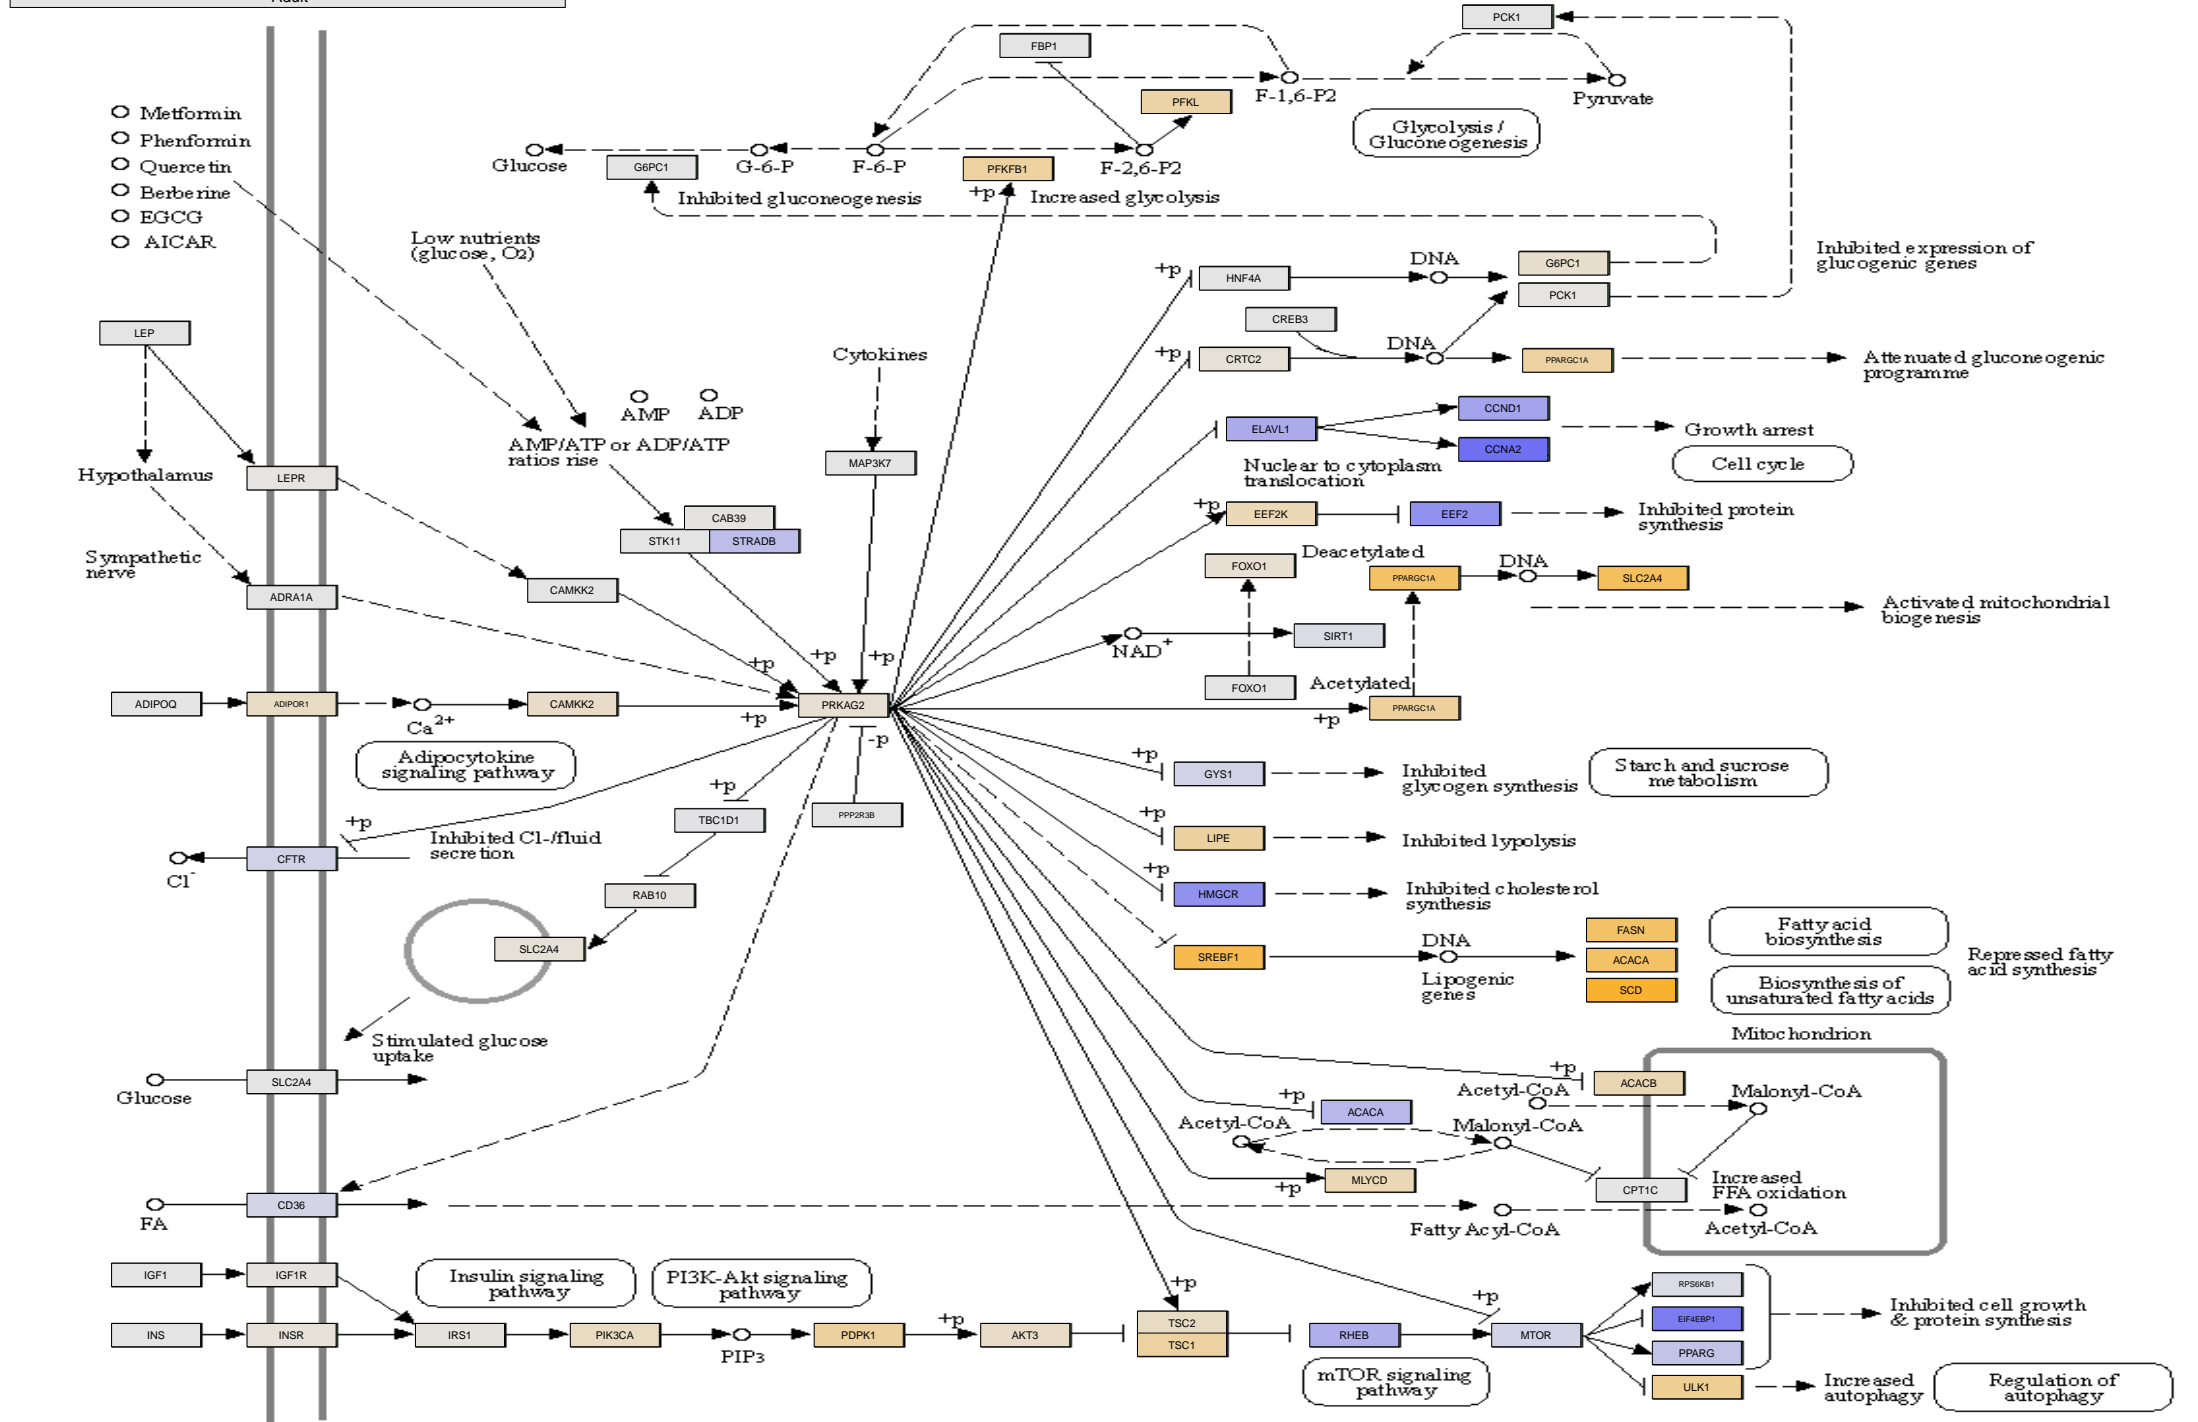



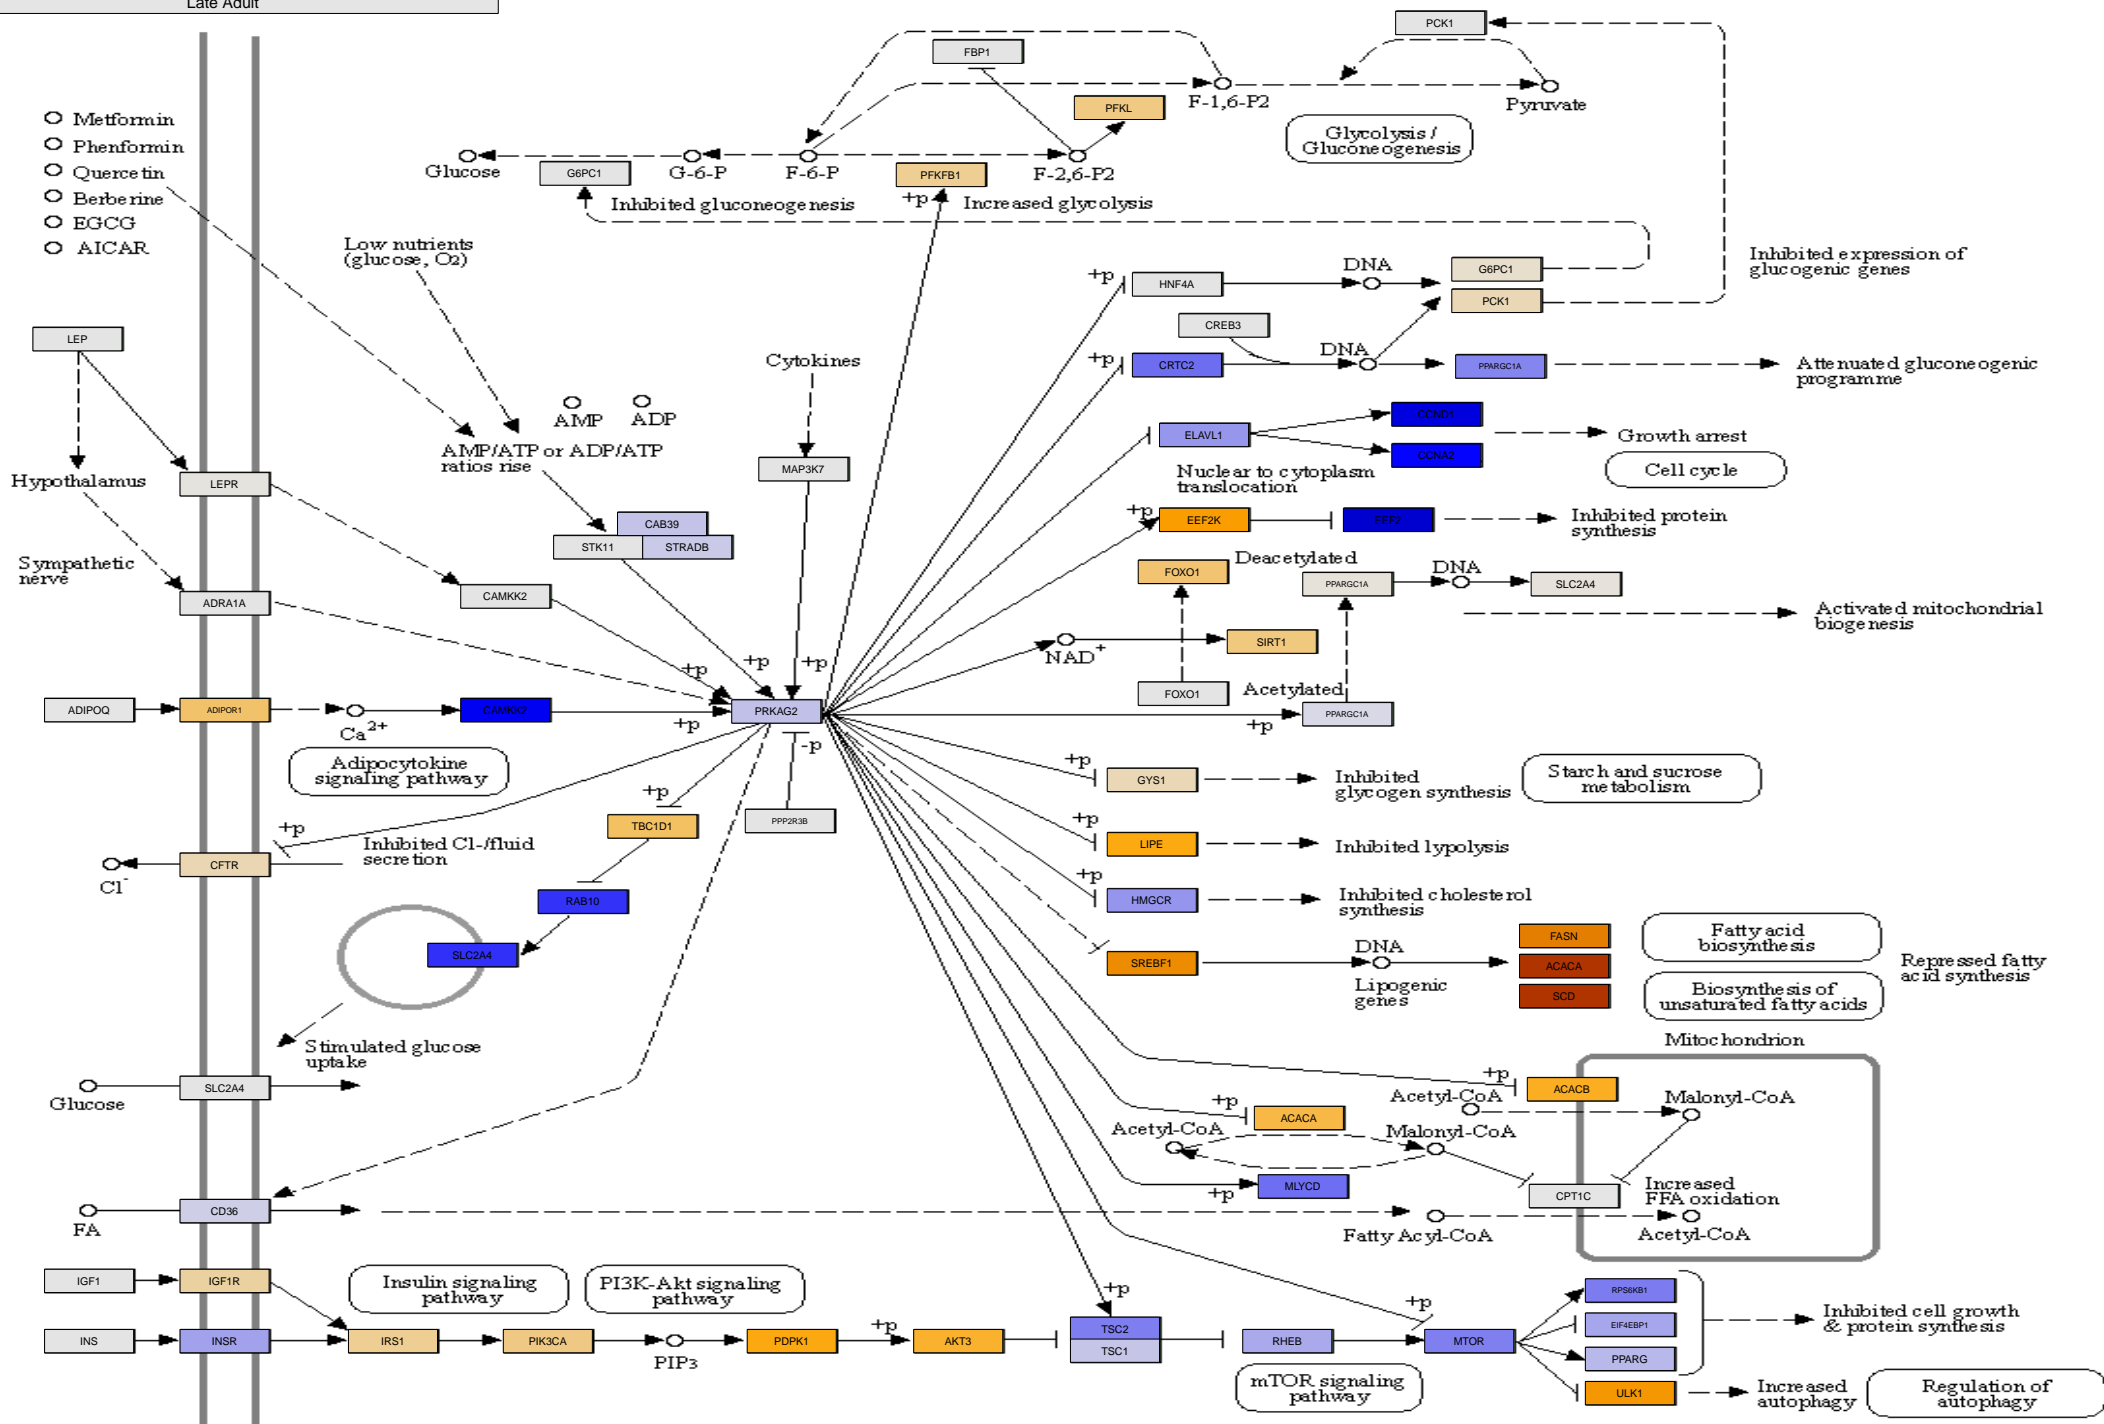

Supplement: s1 [file s1]
