# Supplementary material for: The Transcriptome and Methylome of the Developing and Aging Brain and Their Relations to Gliomas and Psychological Disorders
Source: MDPI journal article supplement (doi:10.3390/cells11030362), 2022-01-21

MAPK signaling pathway

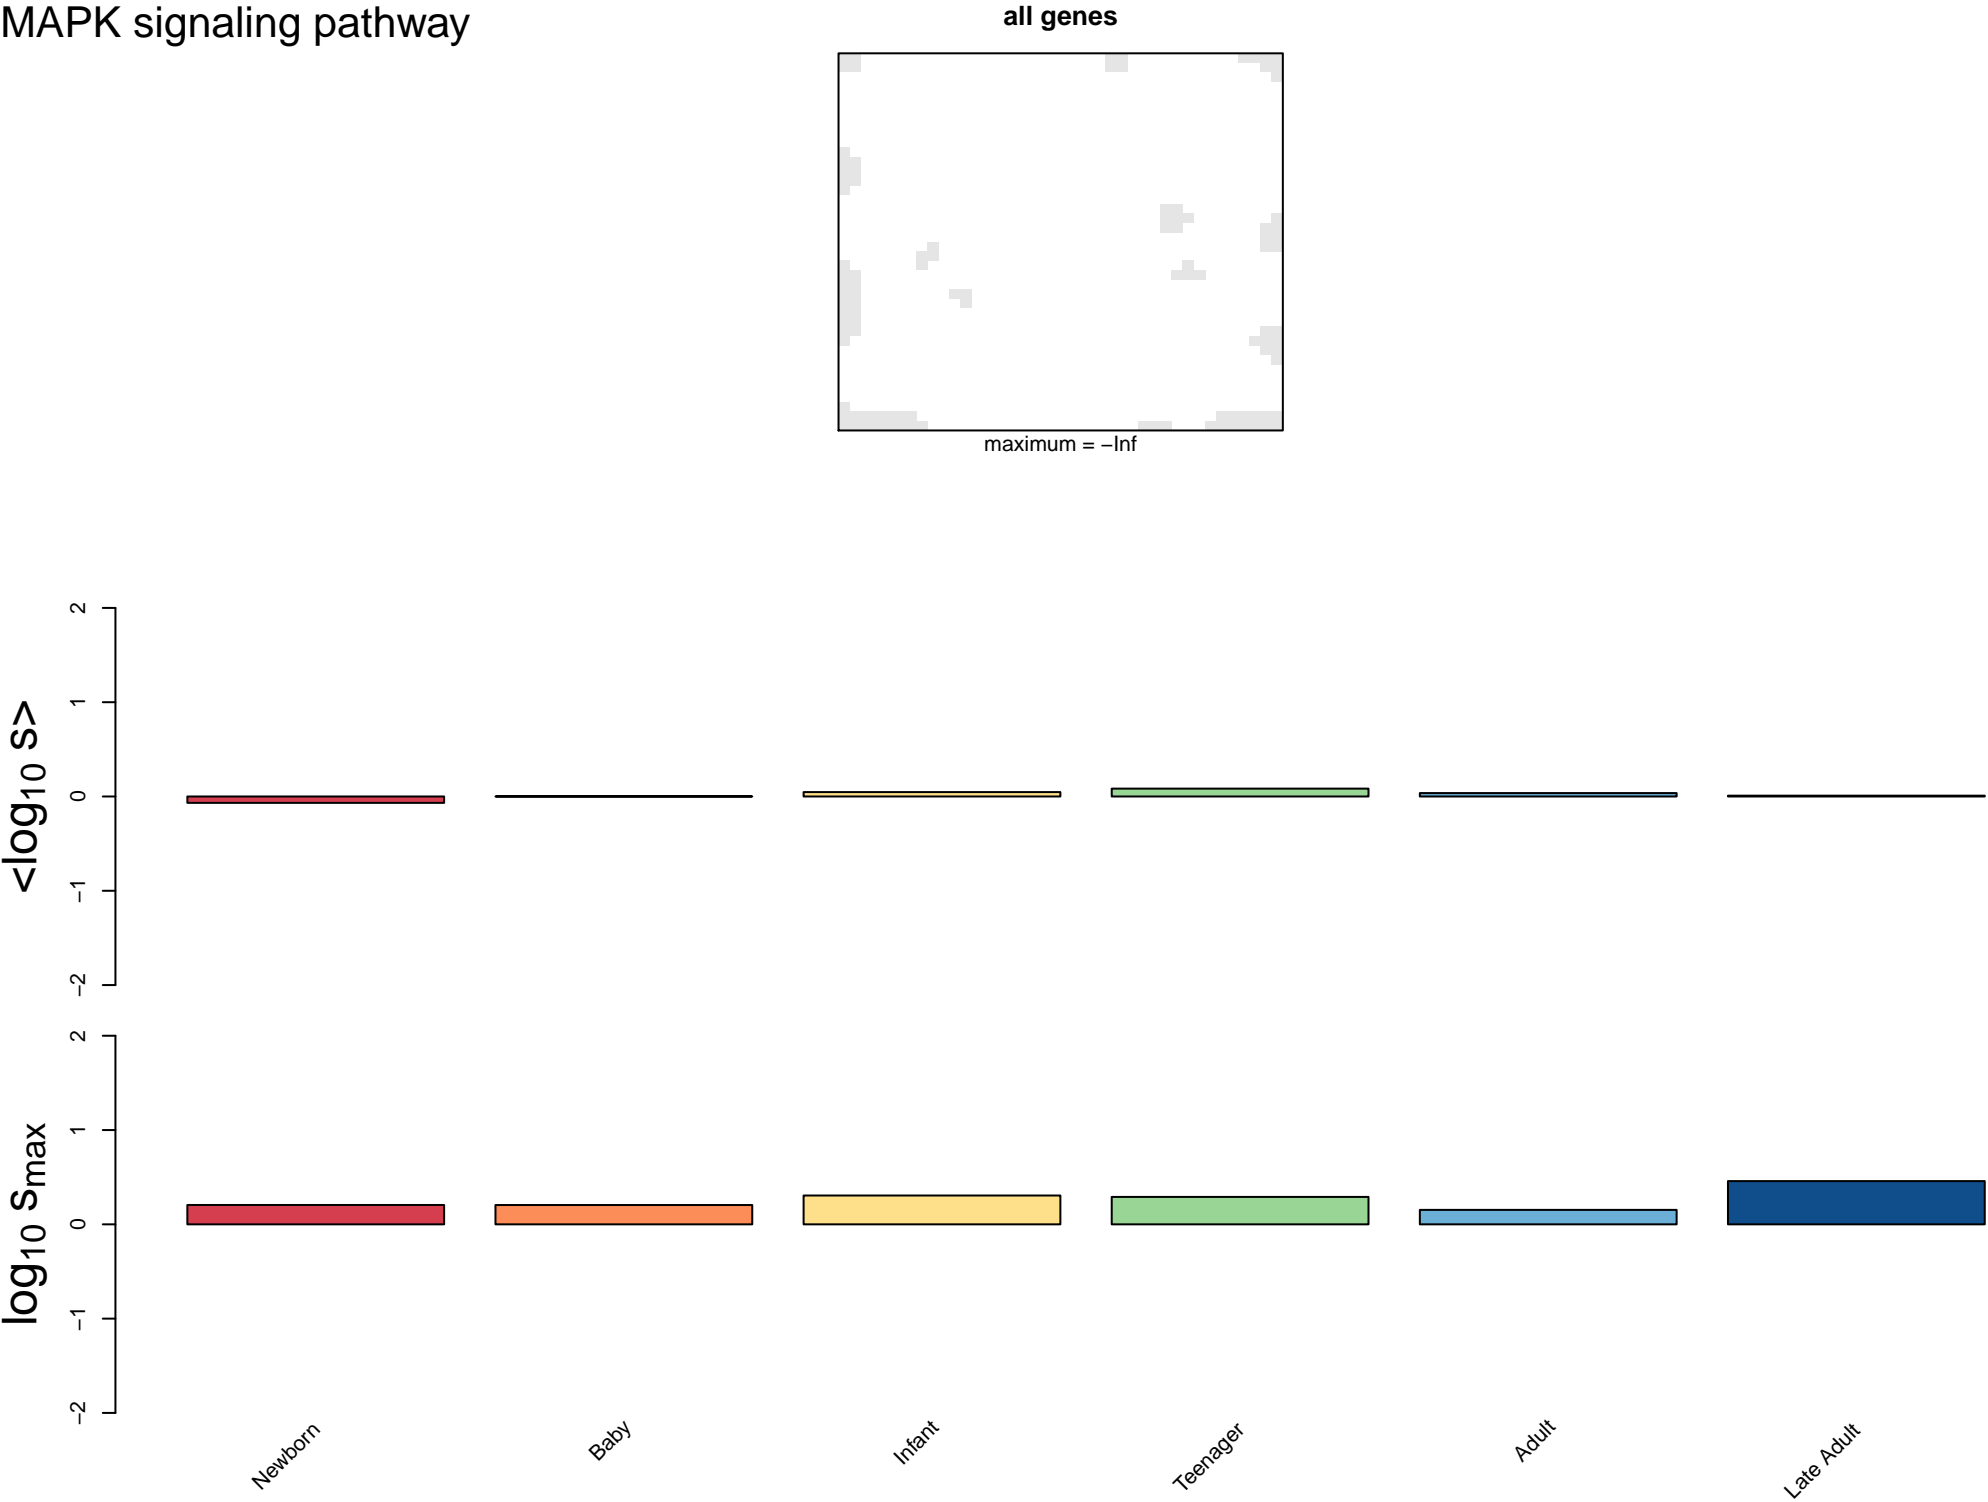

MAPK signaling pathway  
genes with data

Classical MAP kinase  
pathway

JNK and p38 MAP kinase  
pathway

Serum, cytotoxic drugs,  
irradiation, heatshock,  
reactive oxygen species,  
lipopolysaccharide,  
and other stress

ERK5 pathway

Serum, EGF,  
reactive oxygen species,  
or  
Src tyrosinase  
downstream

Phosphatidylinositol  
signaling system

Proliferation,  
inflammation  
anti-apoptosis

Proliferation,  
differentiation

Proliferation,  
differentiation,  
inflammation  
Apoptosis

Cell  
cycle

Proliferation,  
differentiation

MAPKKKK

MAPKKKK

MAPKK

MAPK

Transcription  
factor

DNA

DNA

DNA

DNA

Proliferation,  
inflammation  
anti-apoptosis





MAPK signaling pathway  
Baby

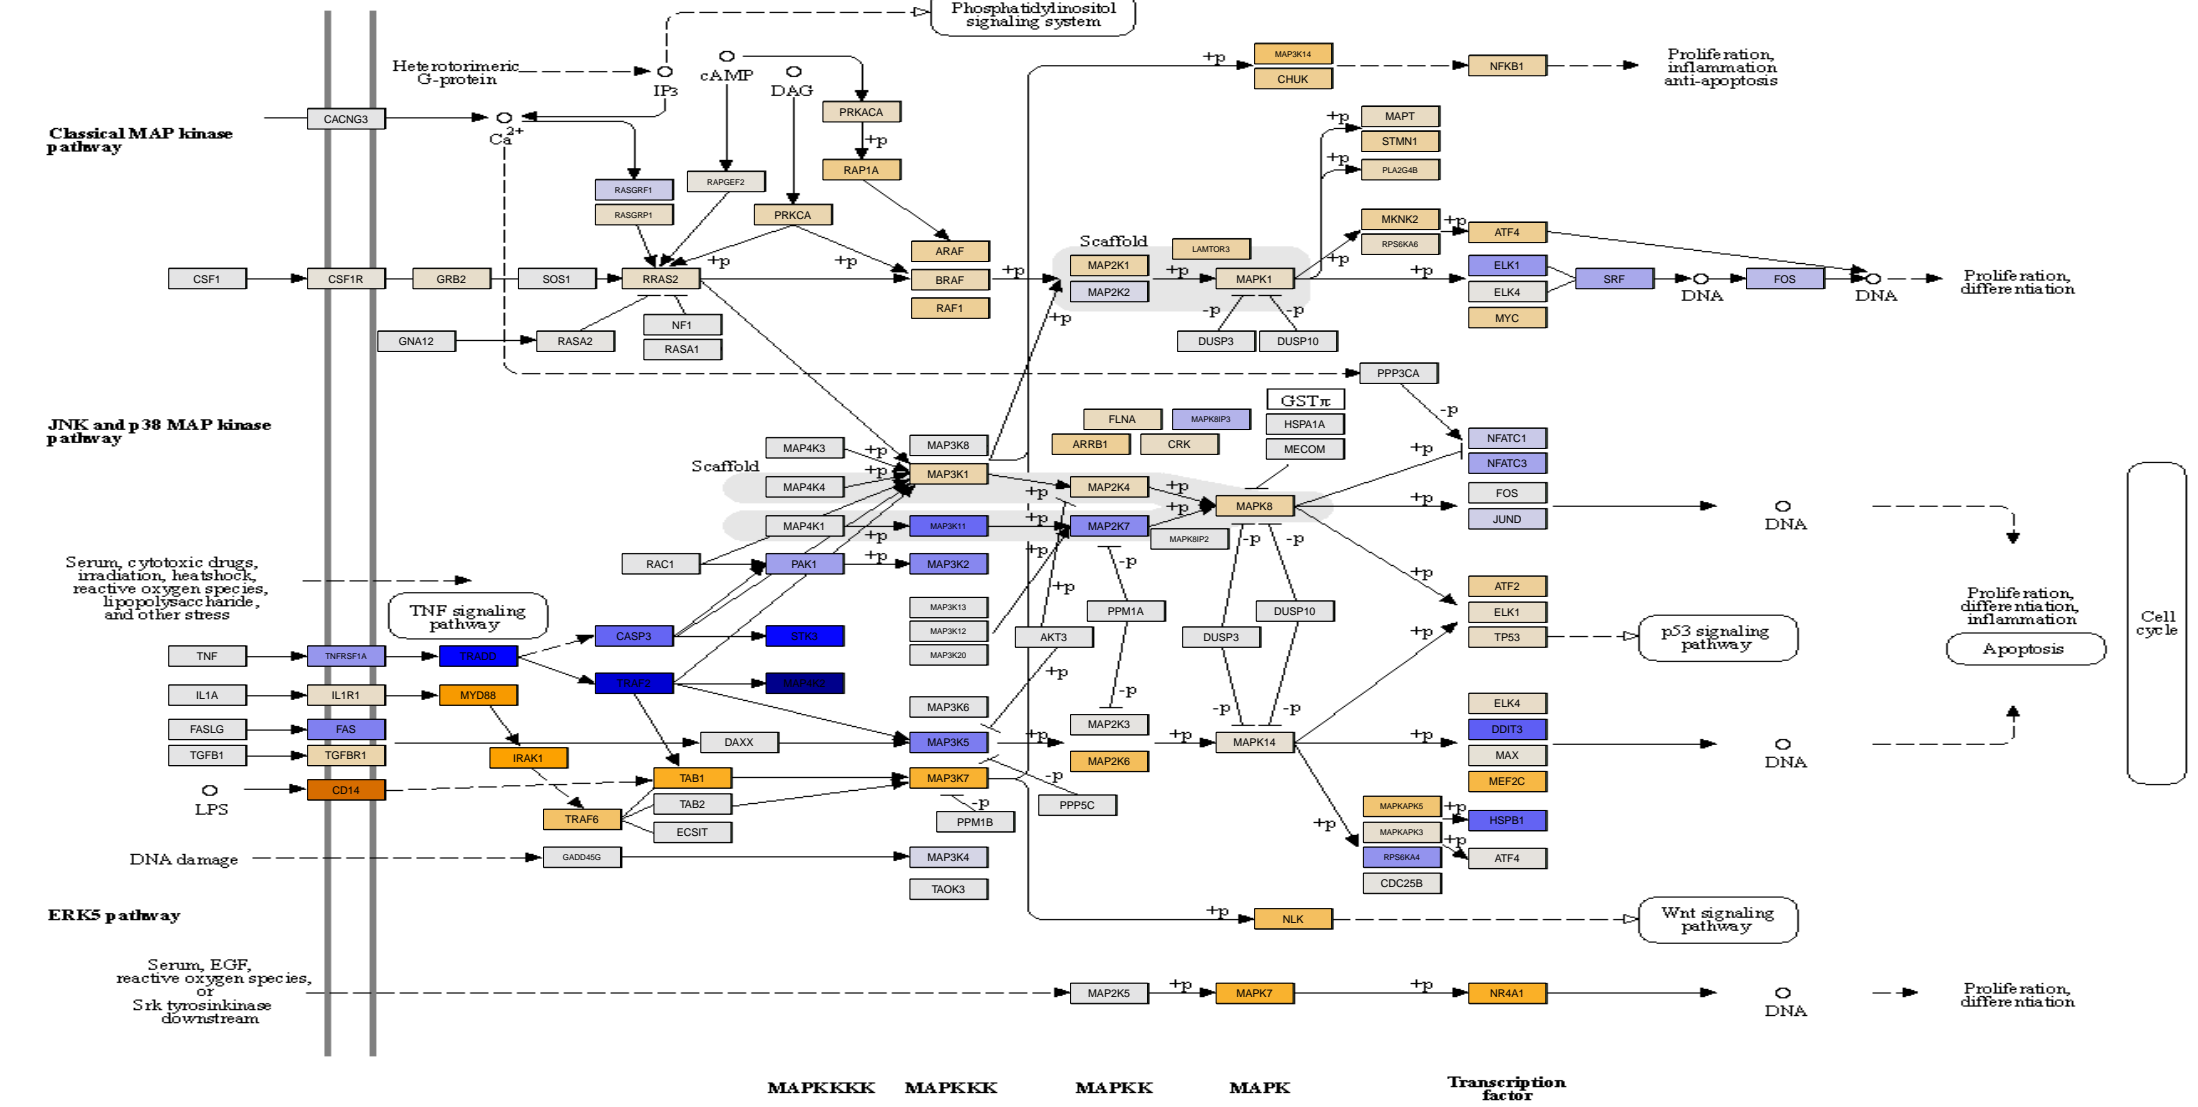

Supplement: s1 [file s1]
