# Supplementary material for: The Transcriptome and Methylome of the Developing and Aging Brain and Their Relations to Gliomas and Psychological Disorders
Source: MDPI journal article supplement (doi:10.3390/cells11030362), 2022-01-21

NF-kappa B signaling pathway

all genes

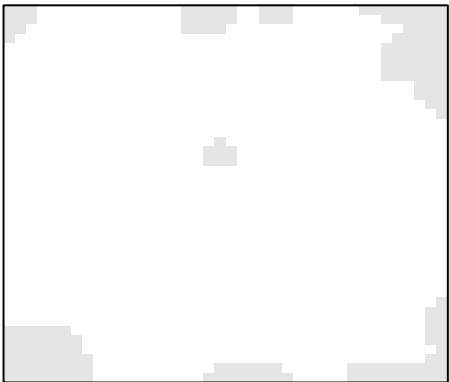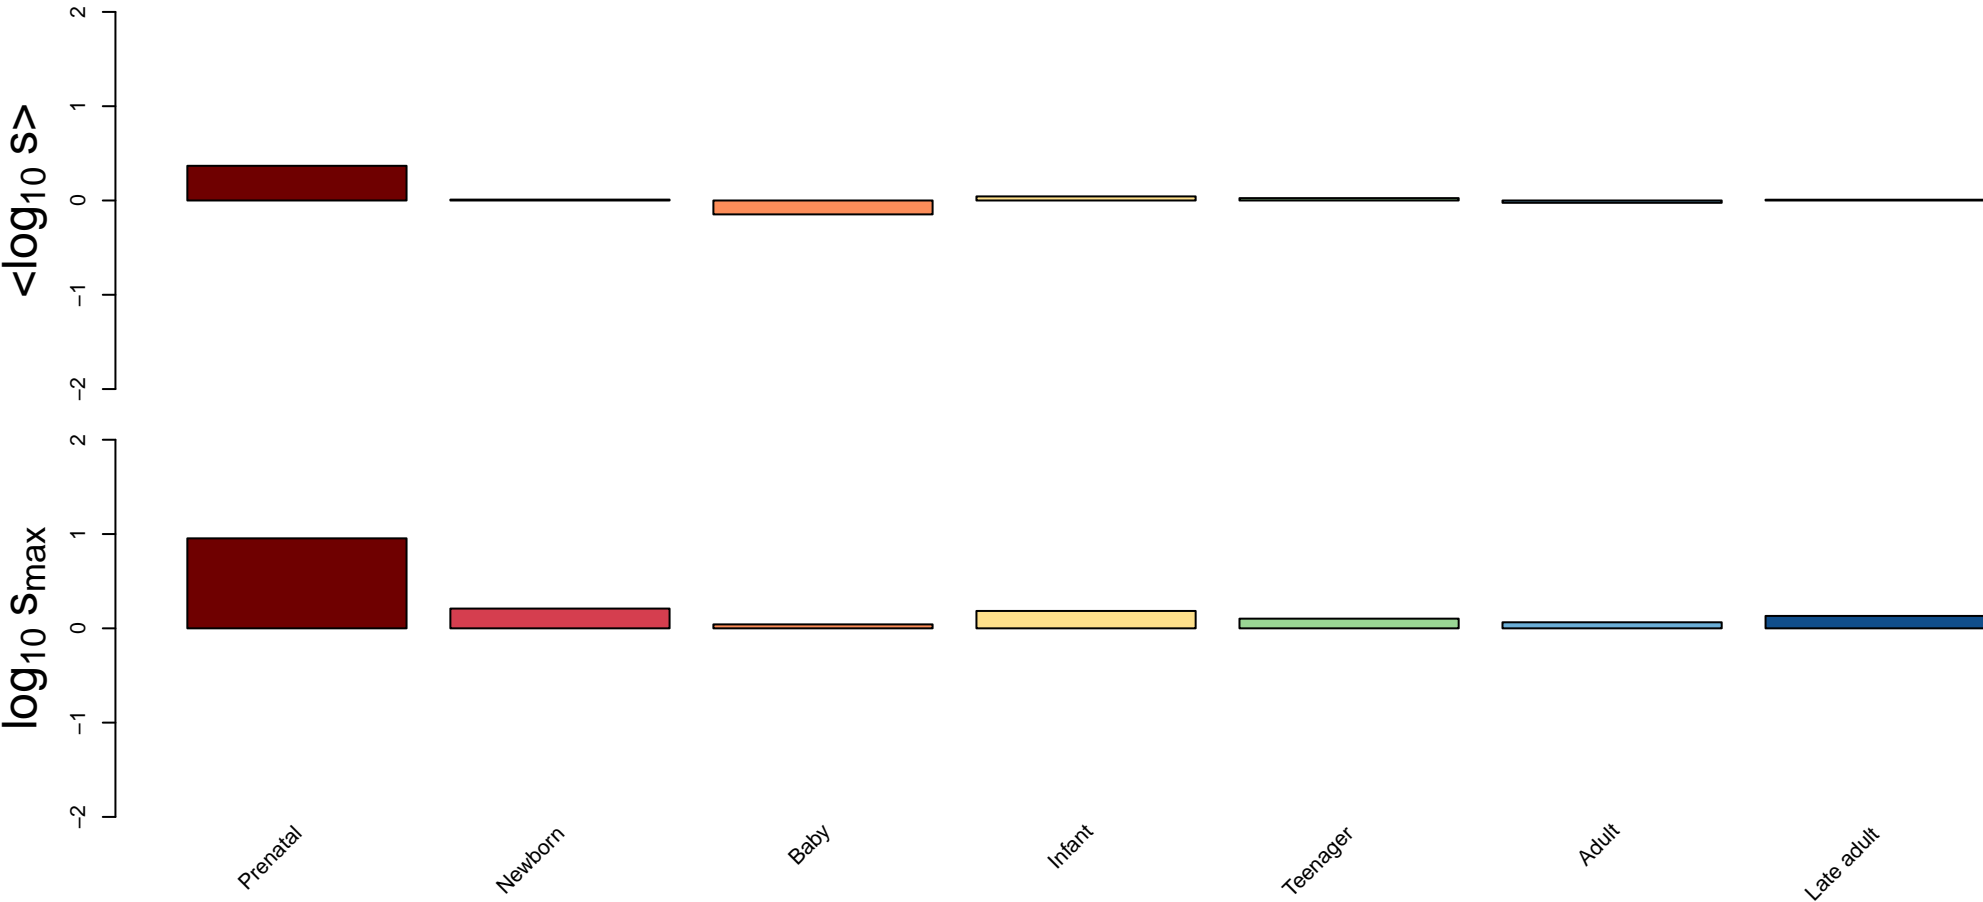





|                              |
|------------------------------|
| NF_kappa_B_signaling_pathway |
| Prenatal                     |

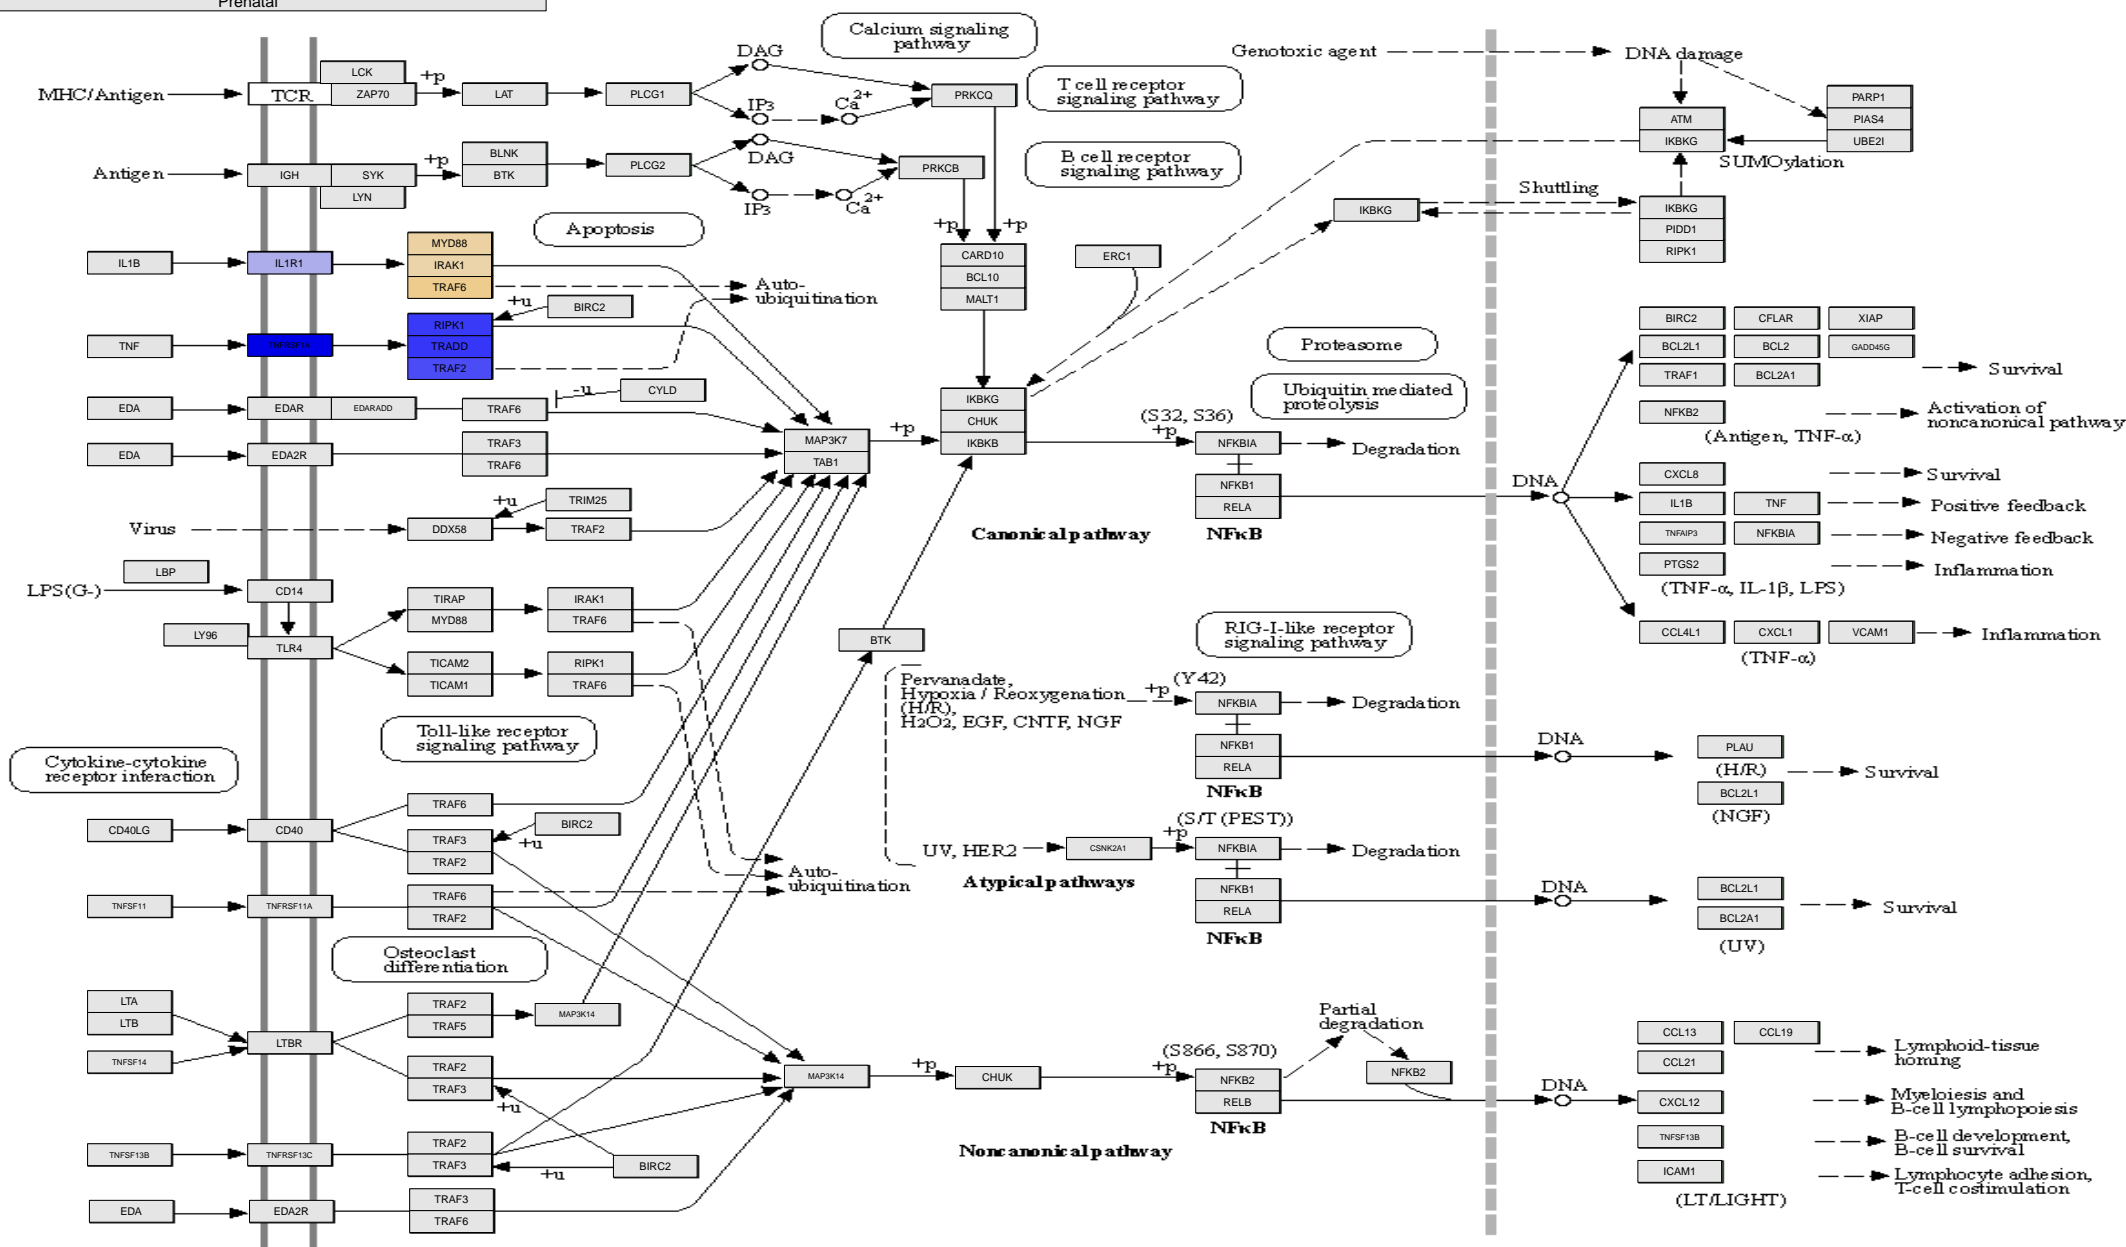

# NF\_kappa\_B\_signaling\_pathway Newborn

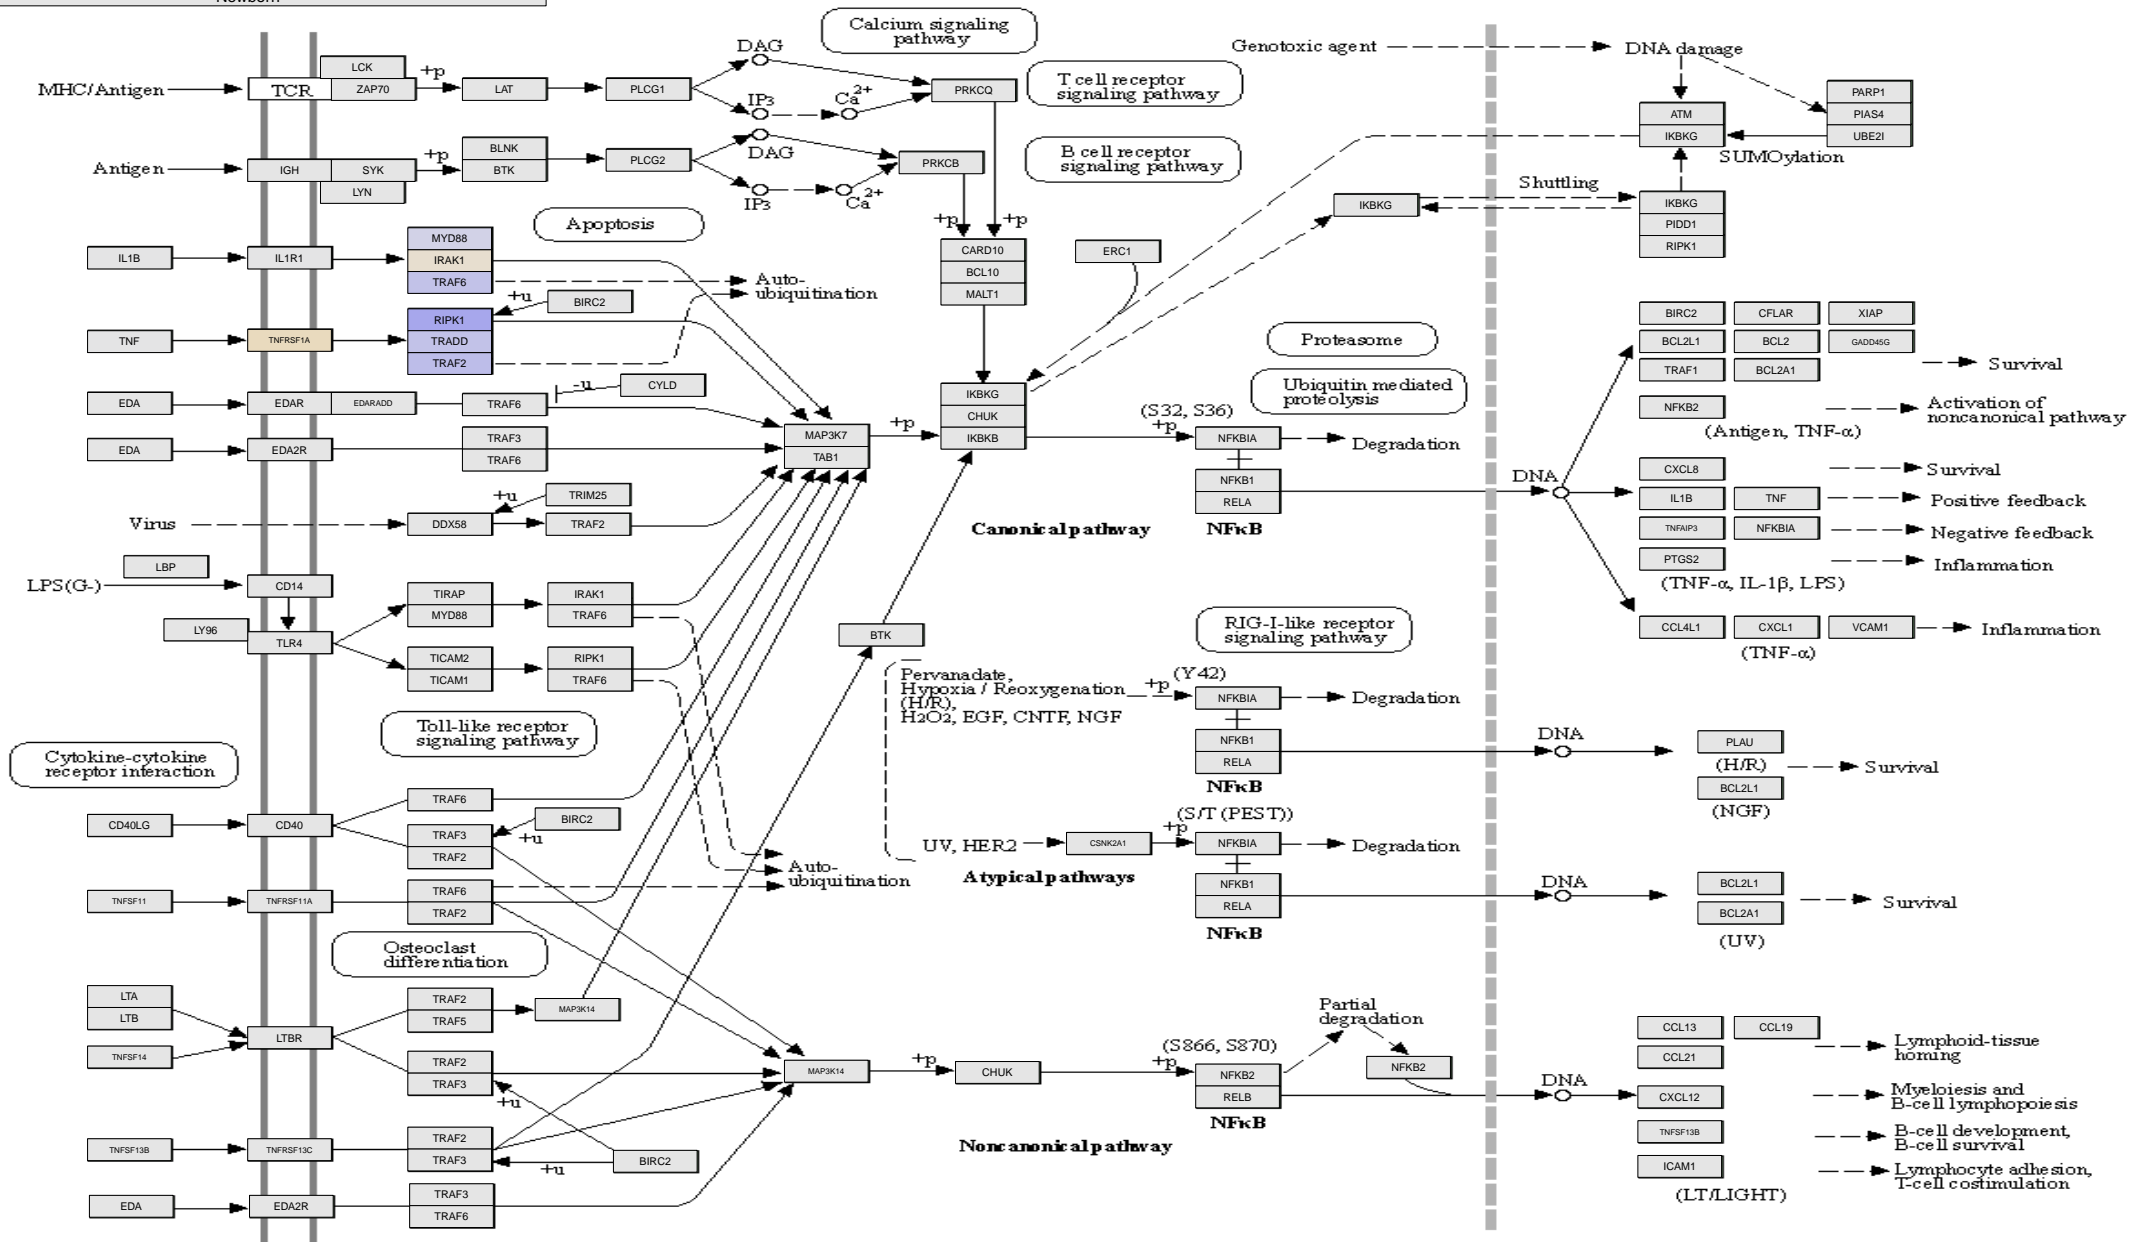

|                              |
|------------------------------|
| NF_kappa_B_signaling_pathway |
| Baby                         |

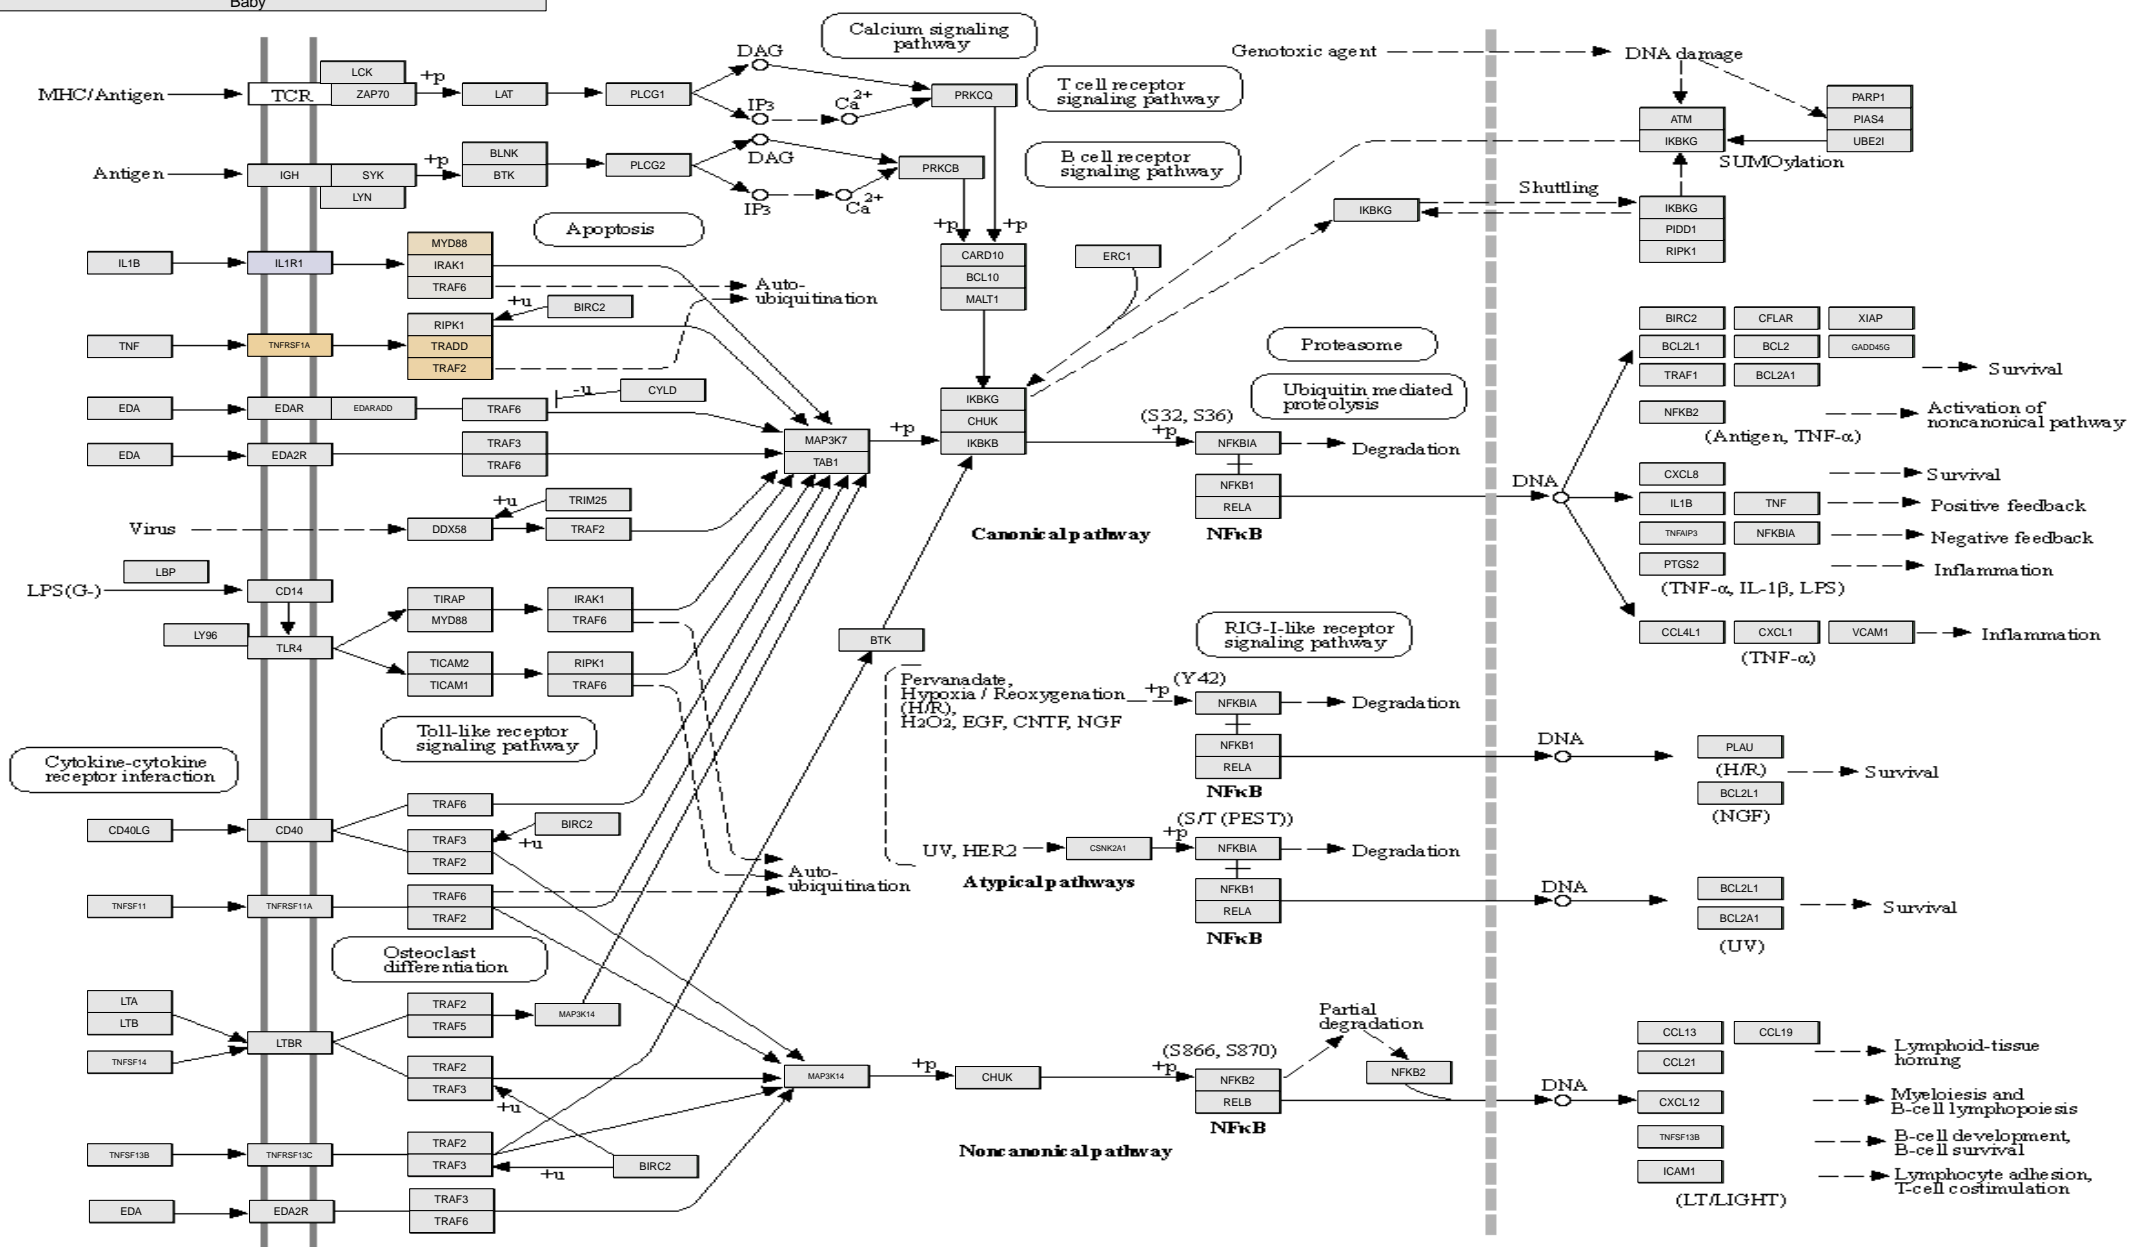

|                              |
|------------------------------|
| NF_kappa_B_signaling_pathway |
| Infant                       |

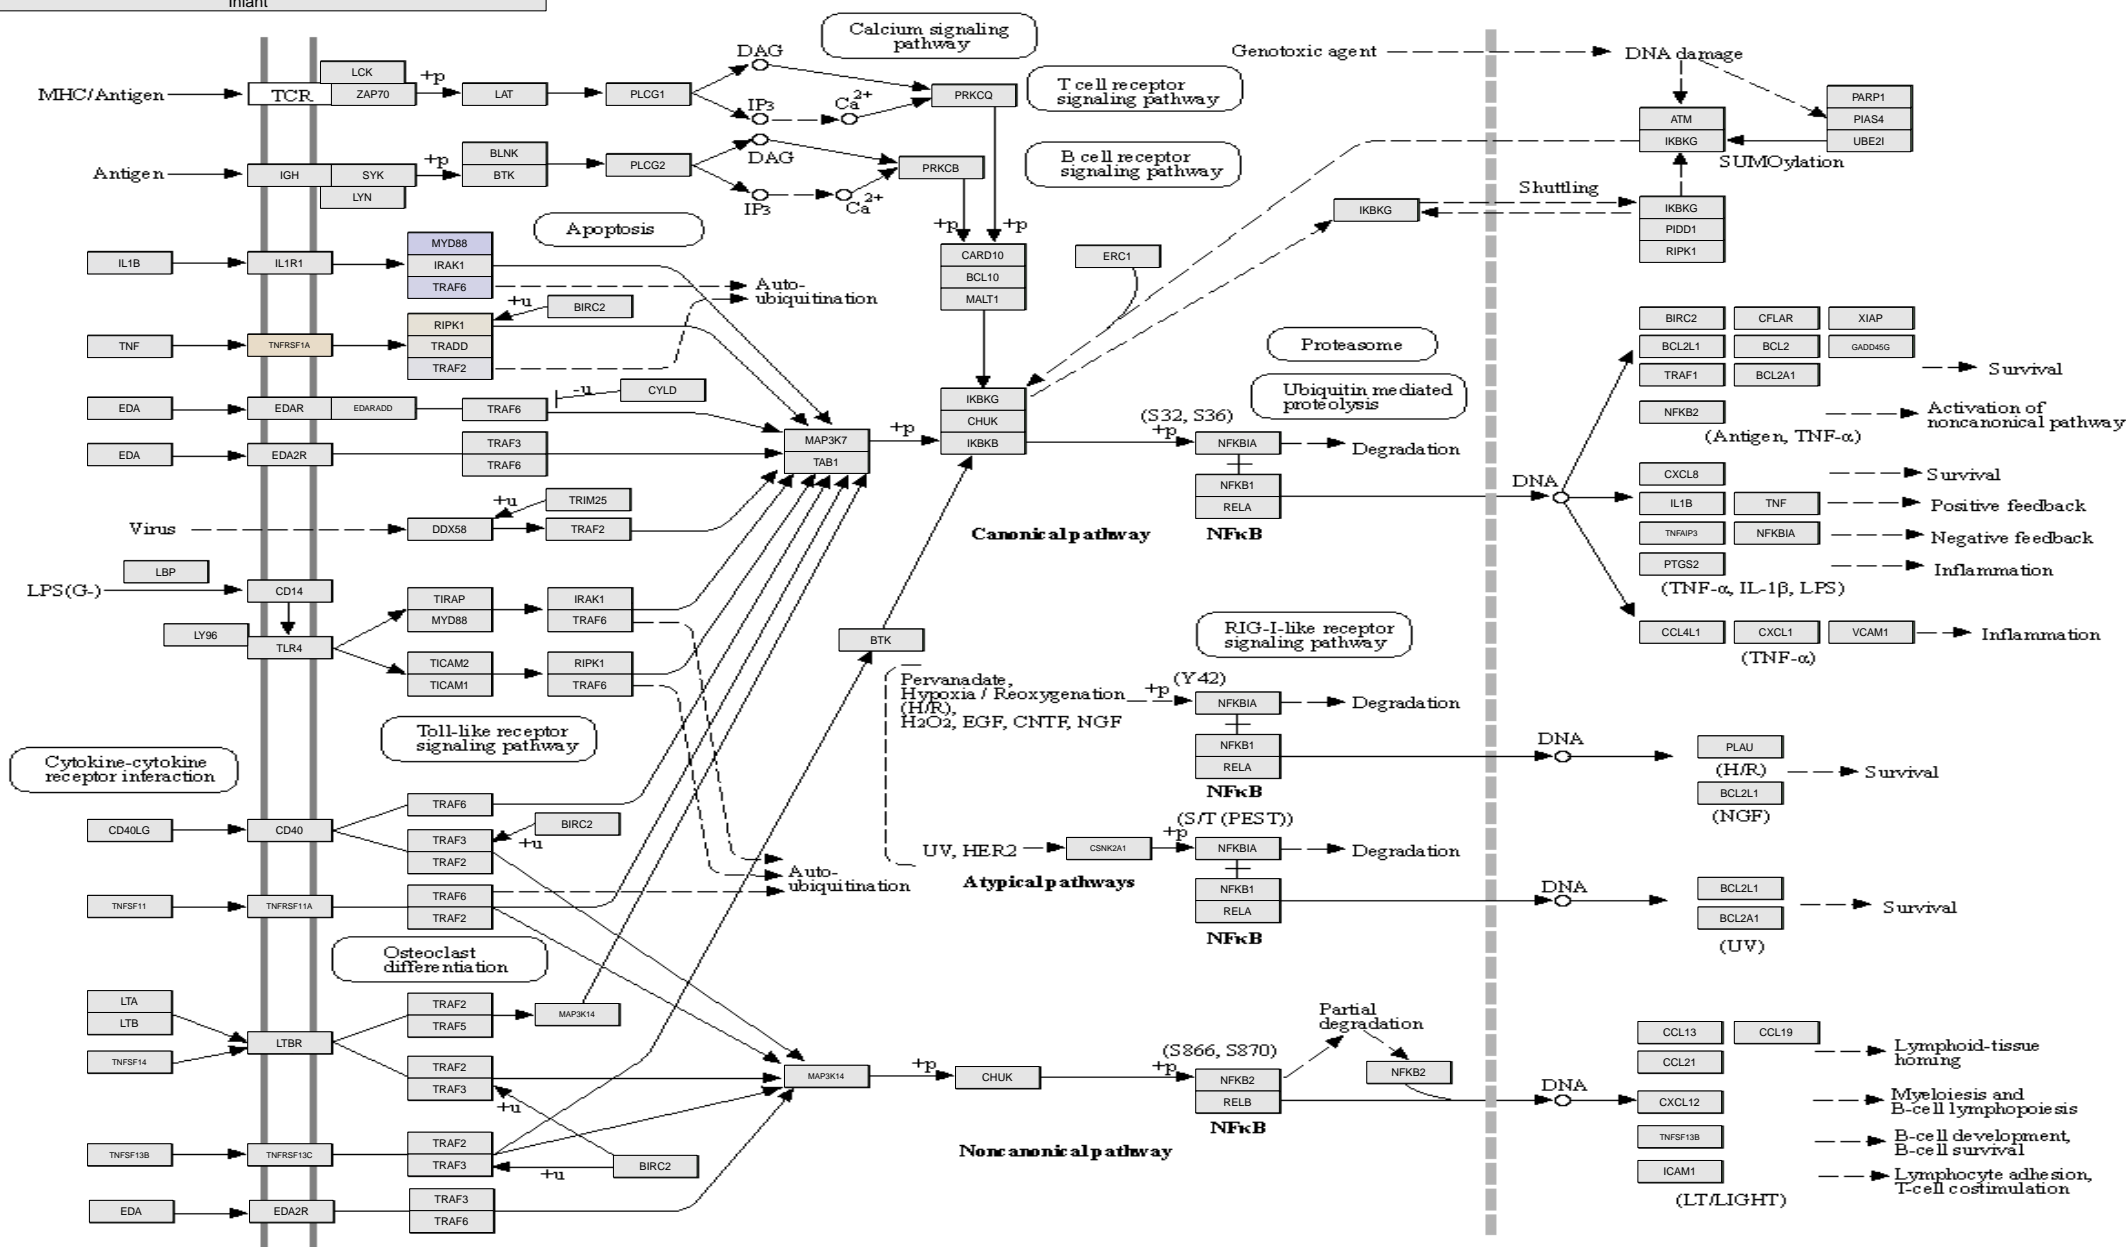

# NF\_kappa\_B\_signaling\_pathway Teenager

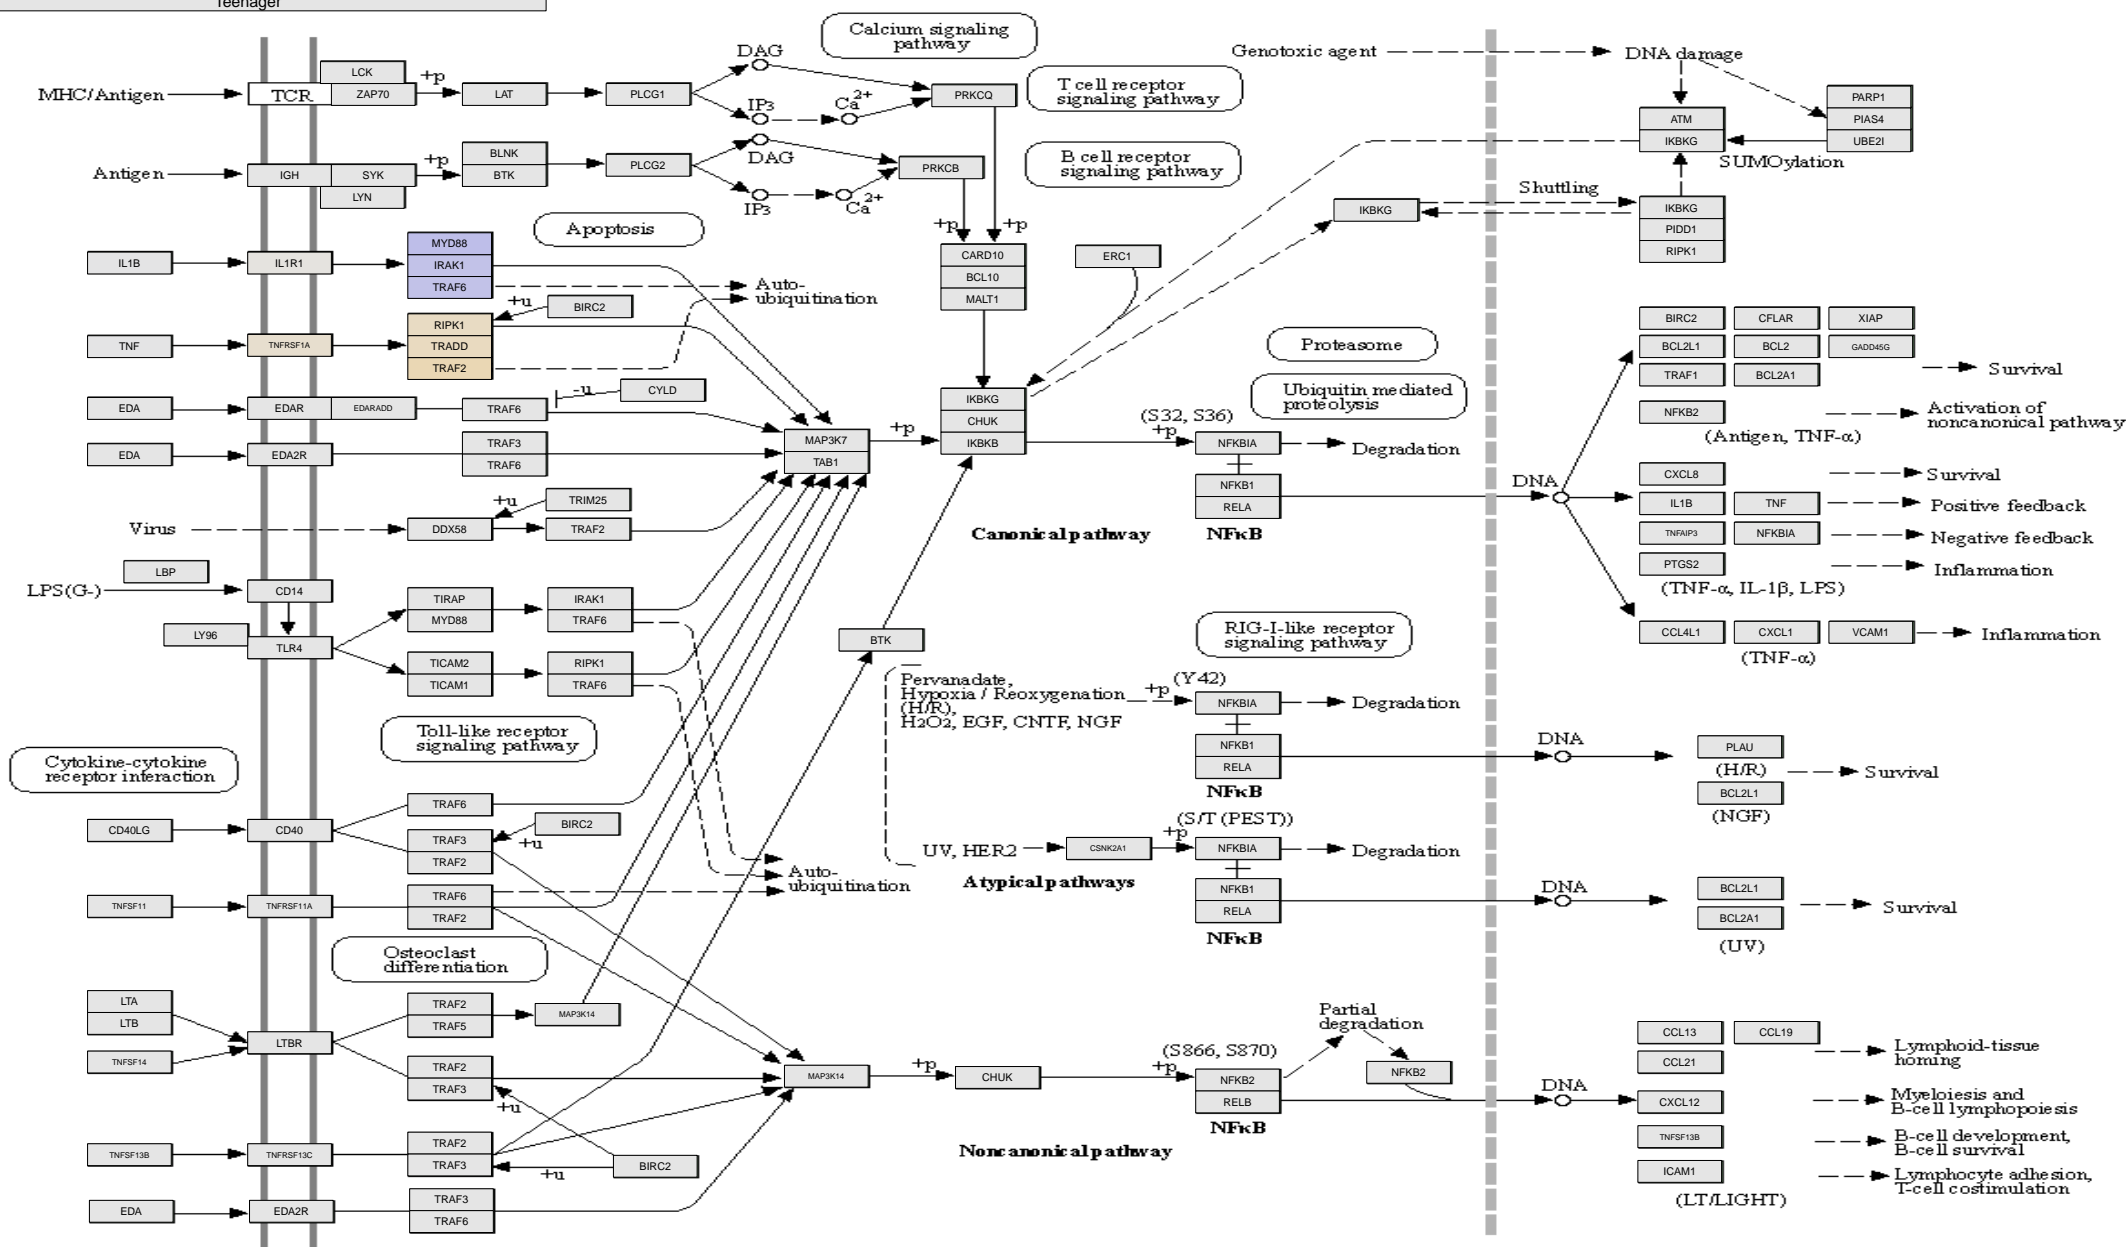



# NF\_kappa\_B\_signaling\_pathway Adult

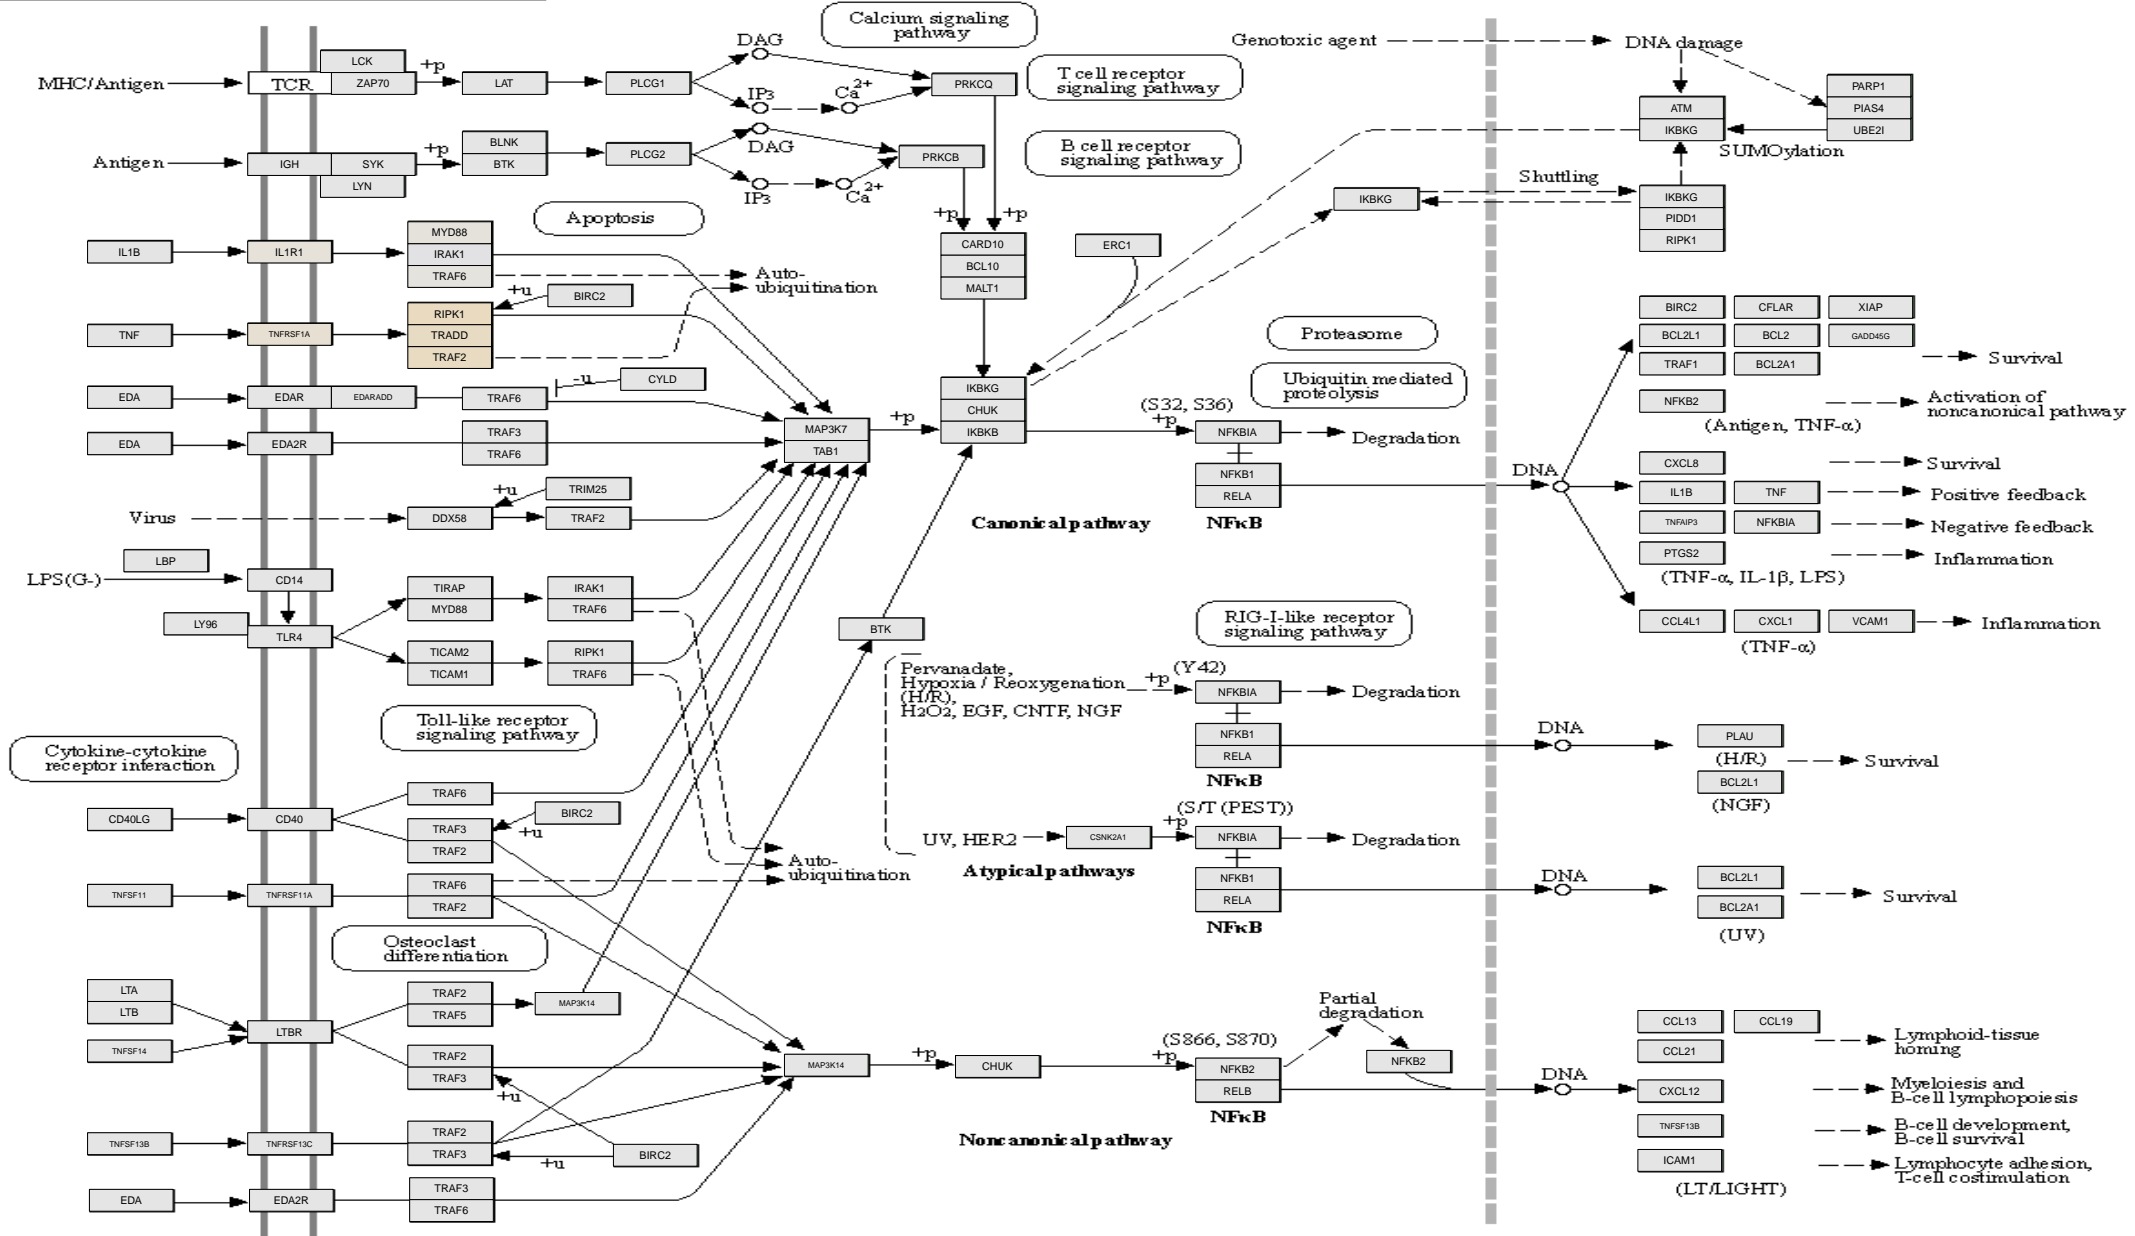

|                              |
|------------------------------|
| NF_kappa_B_signaling_pathway |
| Late adult                   |

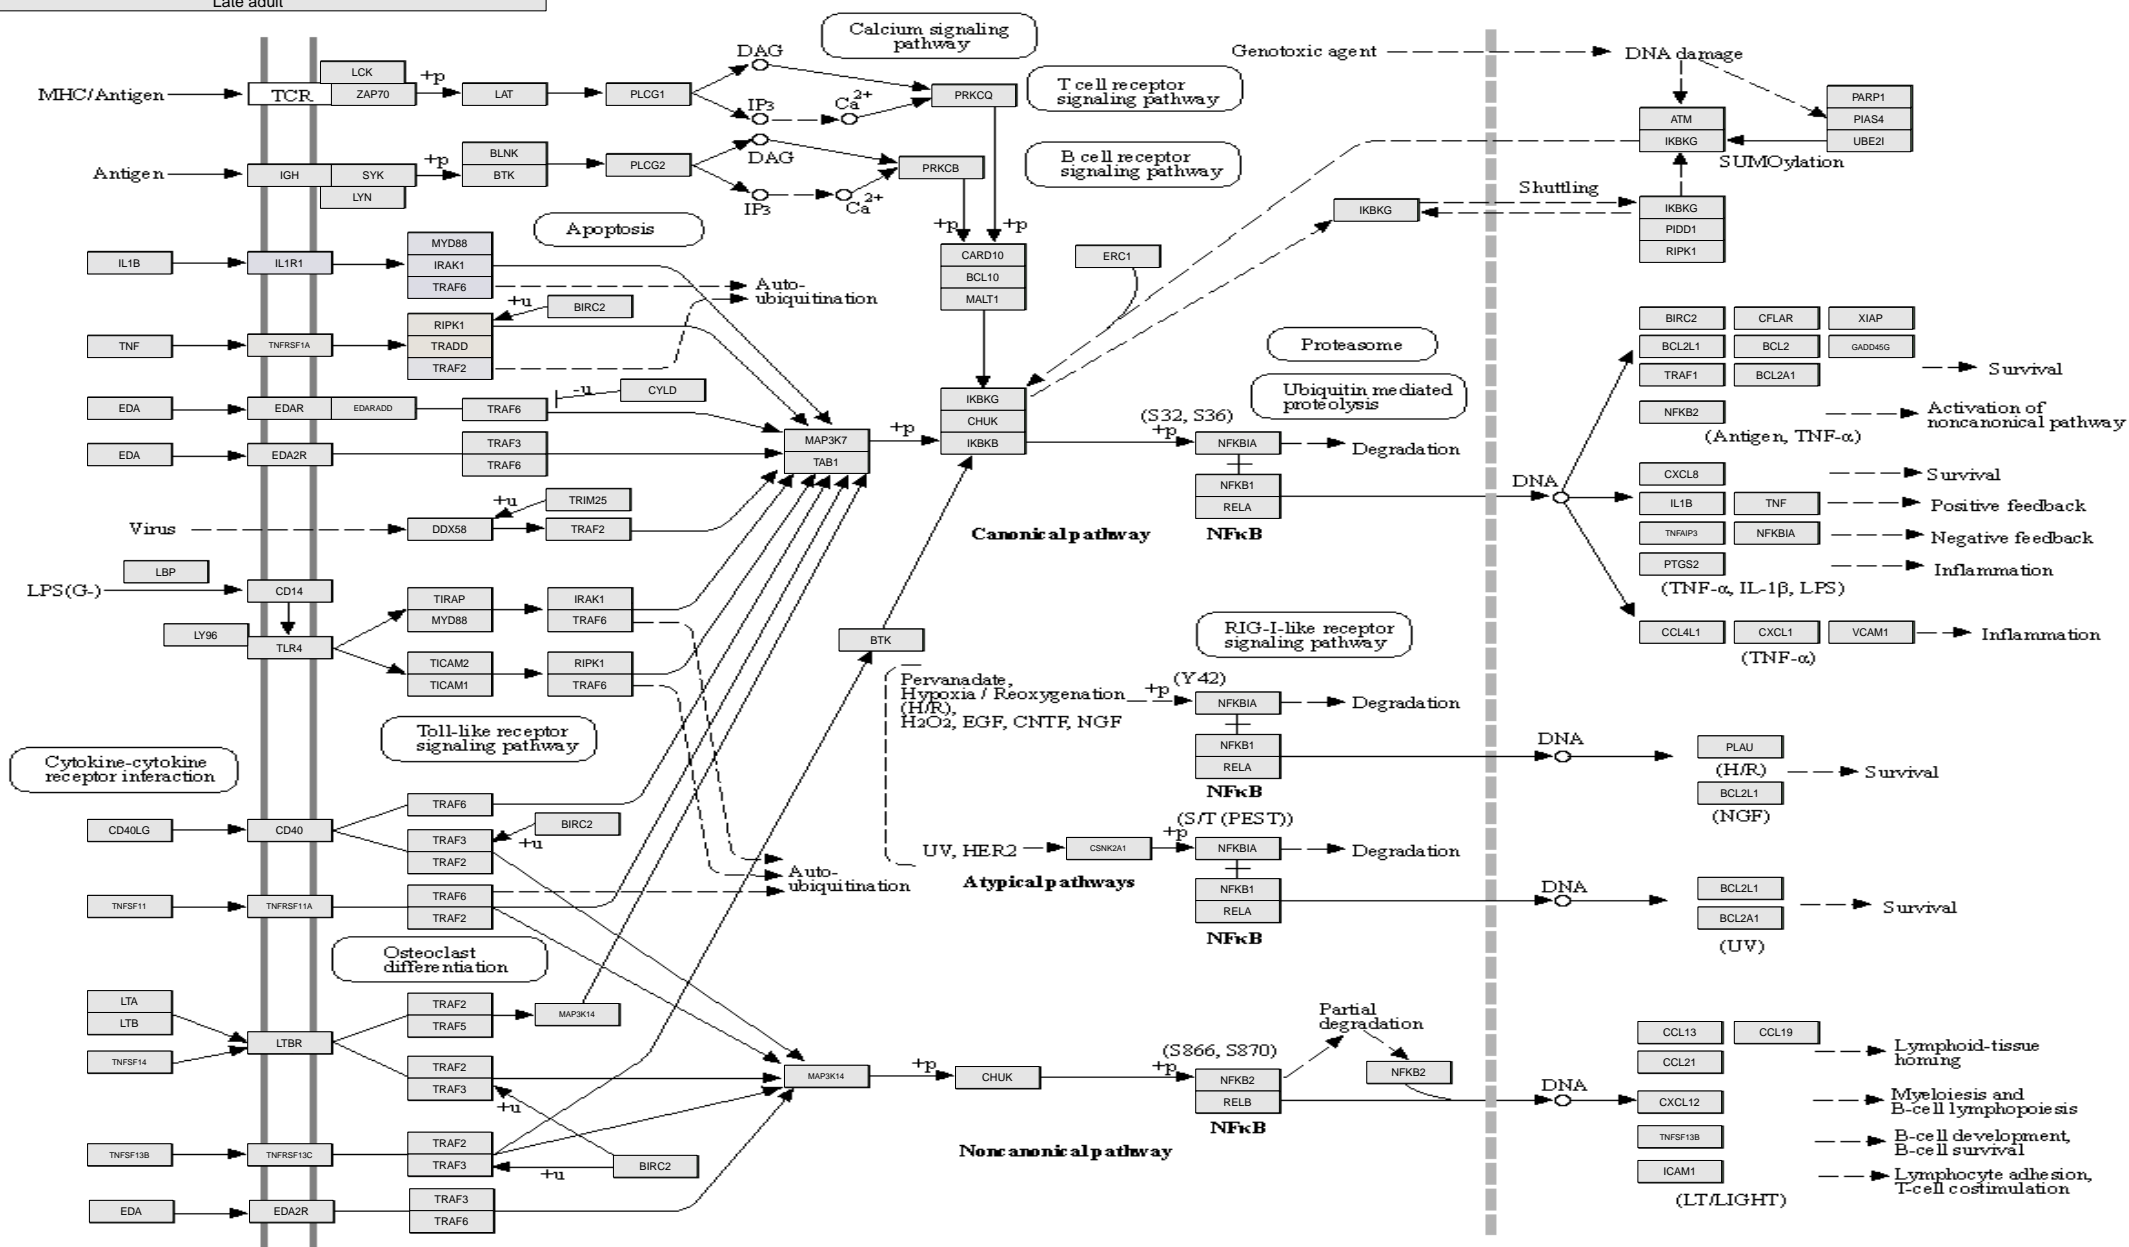

Supplement: s1 [file s1]
