# Supplementary material for: The Transcriptome and Methylome of the Developing and Aging Brain and Their Relations to Gliomas and Psychological Disorders
Source: MDPI journal article supplement (doi:10.3390/cells11030362), 2022-01-21

JAK-STAT signaling pathway

all genes

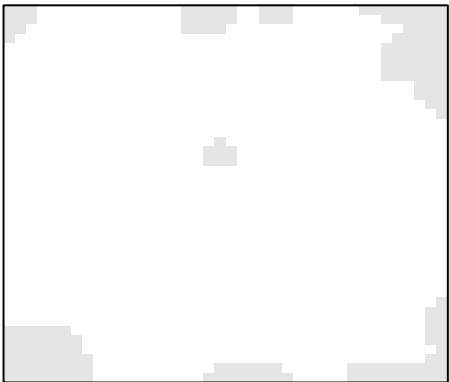

maximum = -Inf

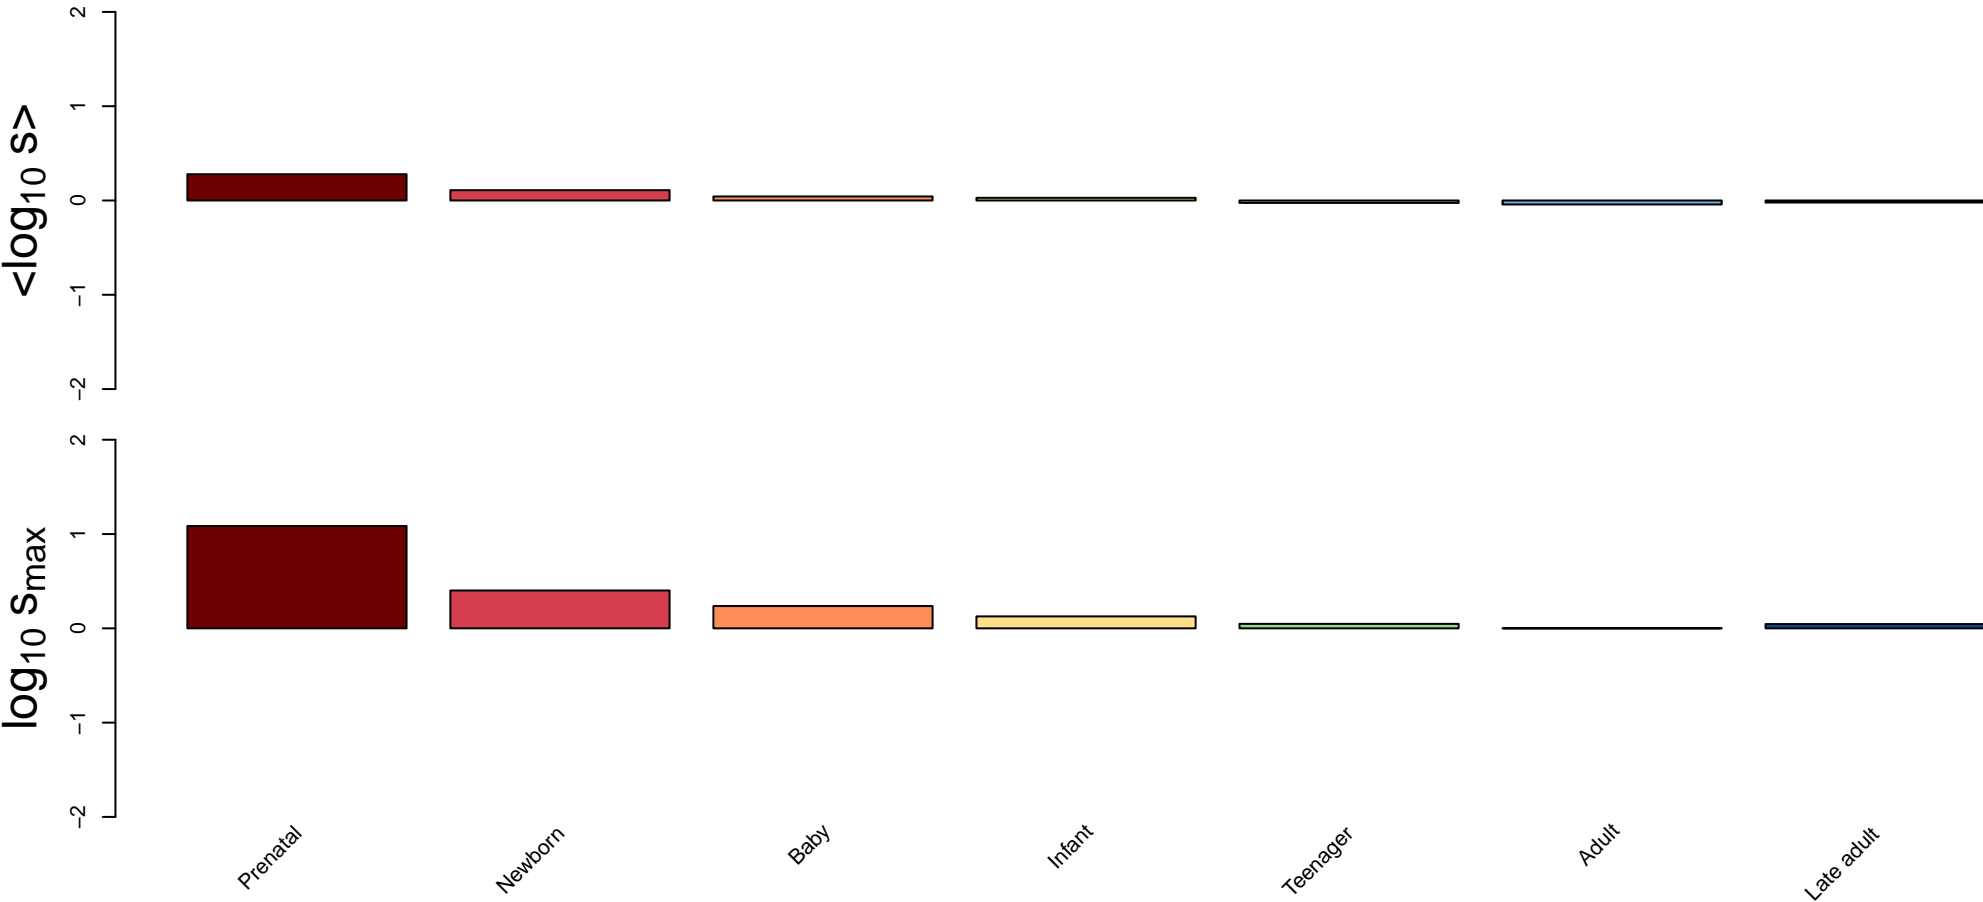

JAK\_STAT\_signaling\_pathway  
genes with data

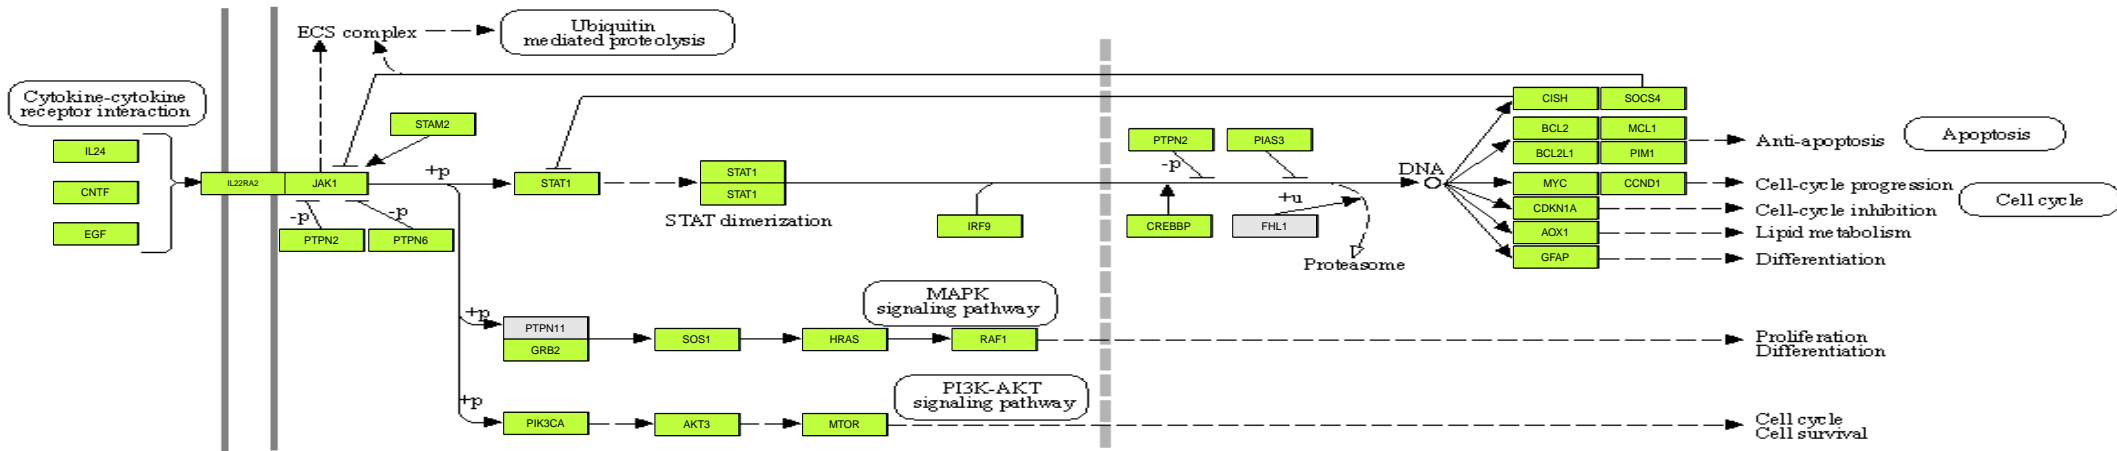

JAK\_STAT\_signaling\_pathway  
sink nodes

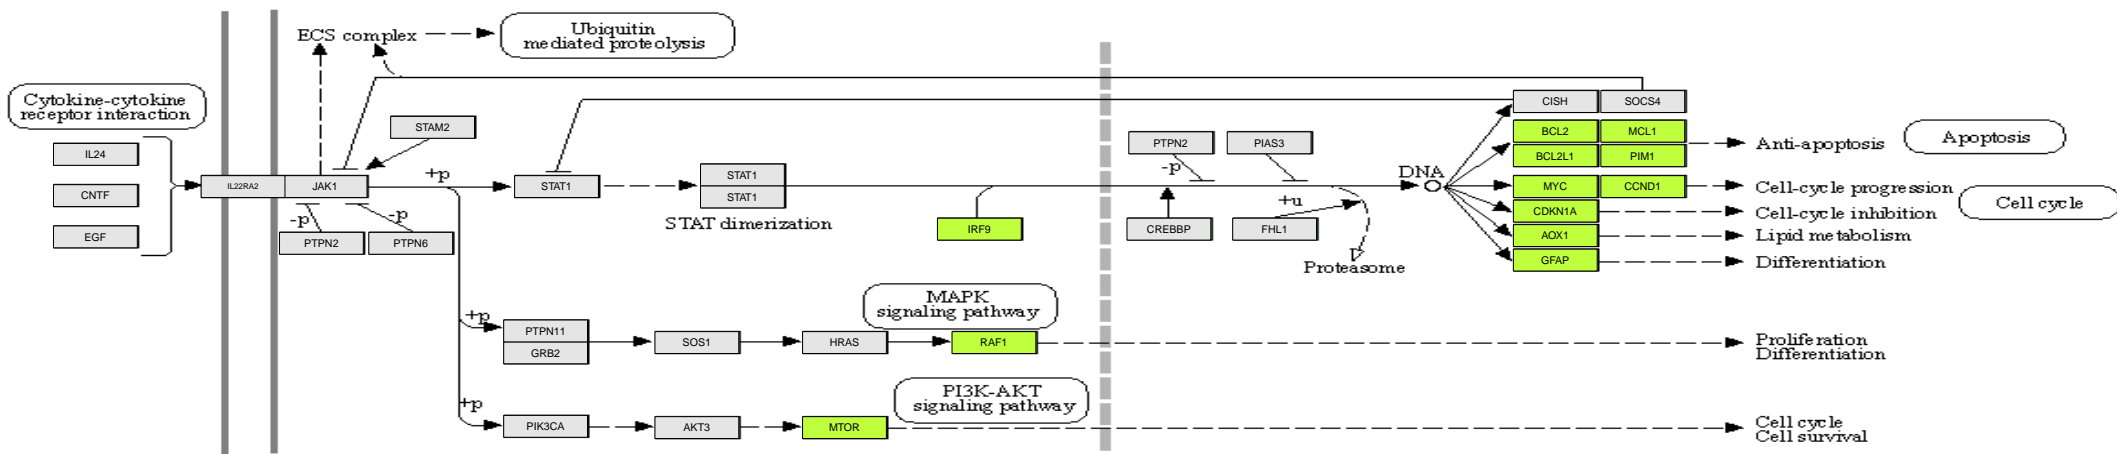

JAK\_STAT\_signaling\_pathway  
Prenatal

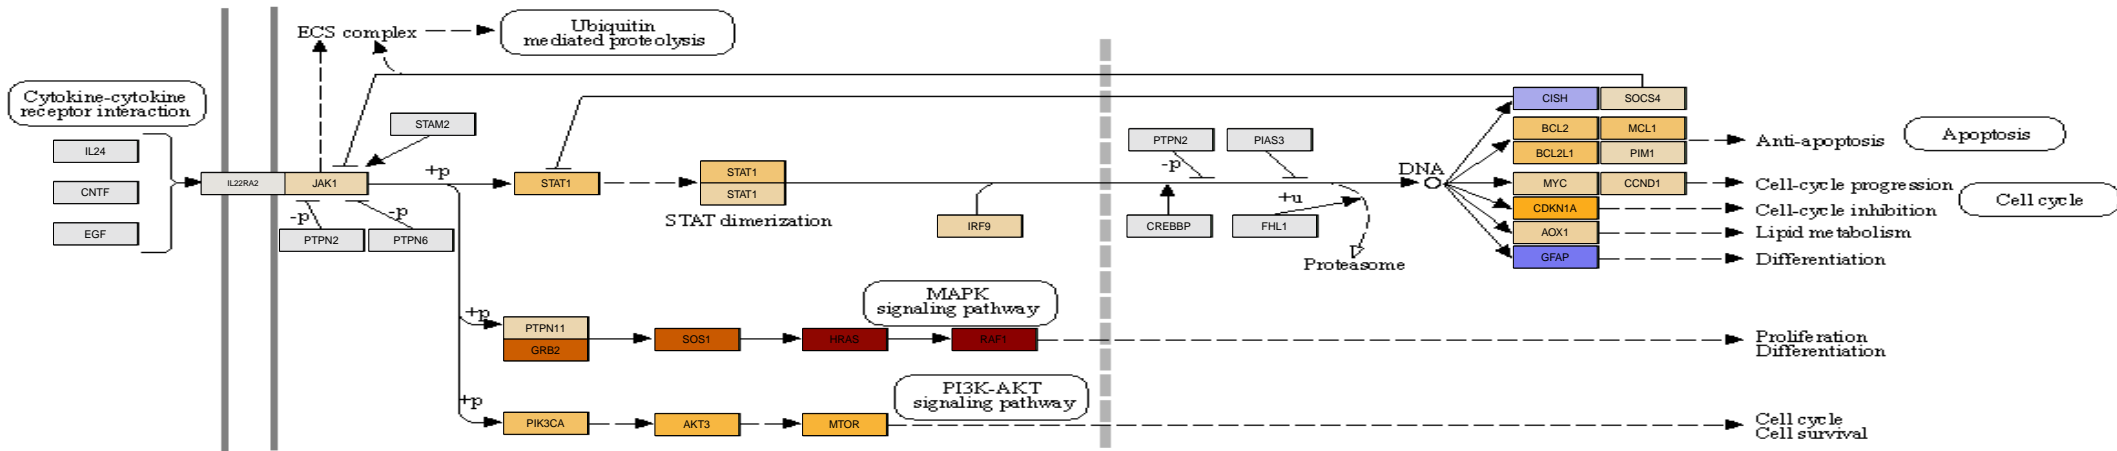

JAK\_STAT\_signaling\_pathway  
Newborn

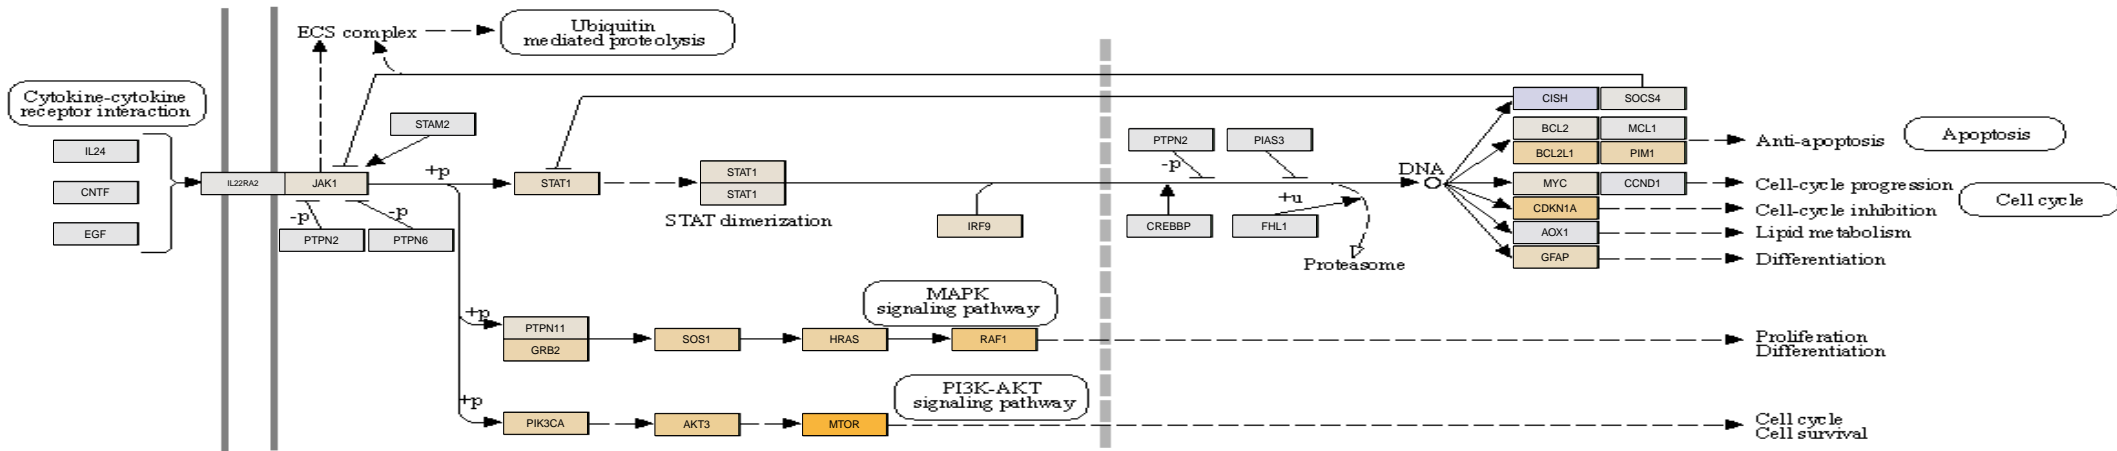

JAK\_STAT\_signaling\_pathway  
Baby

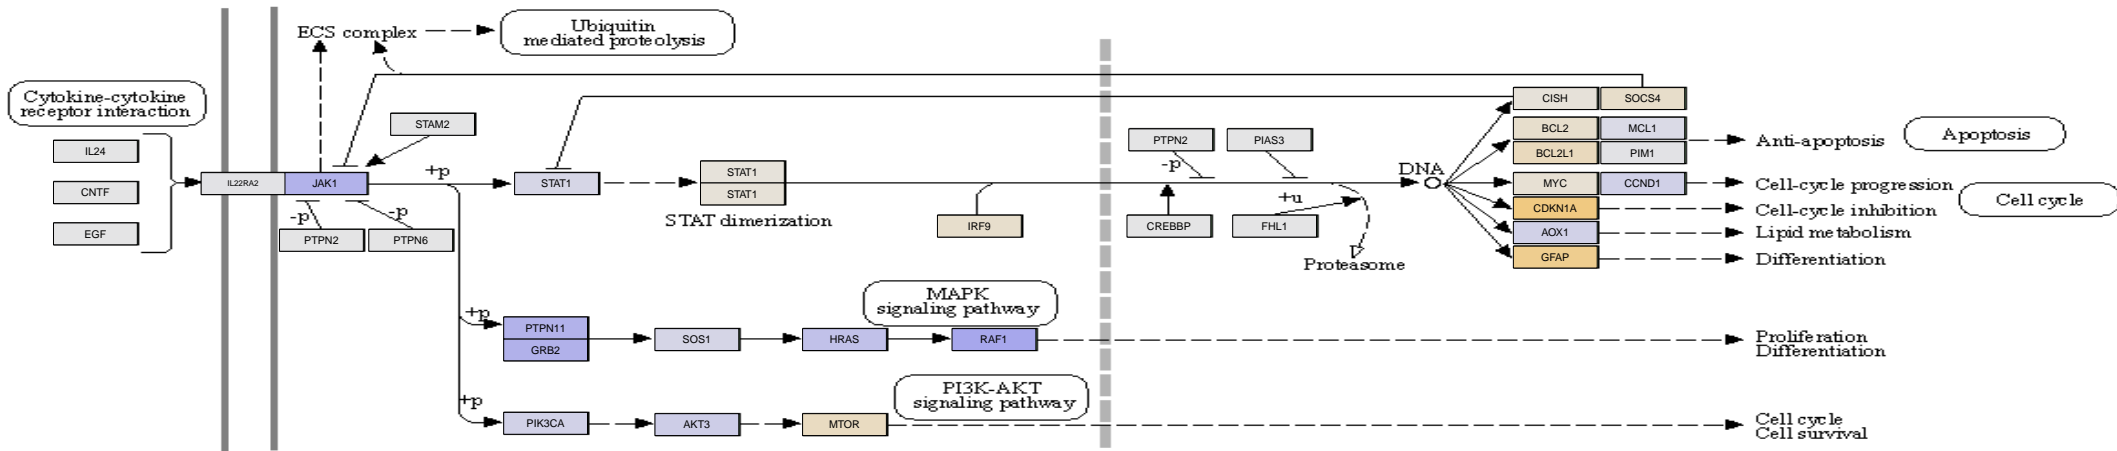

JAK\_STAT\_signaling\_pathway  
Infant

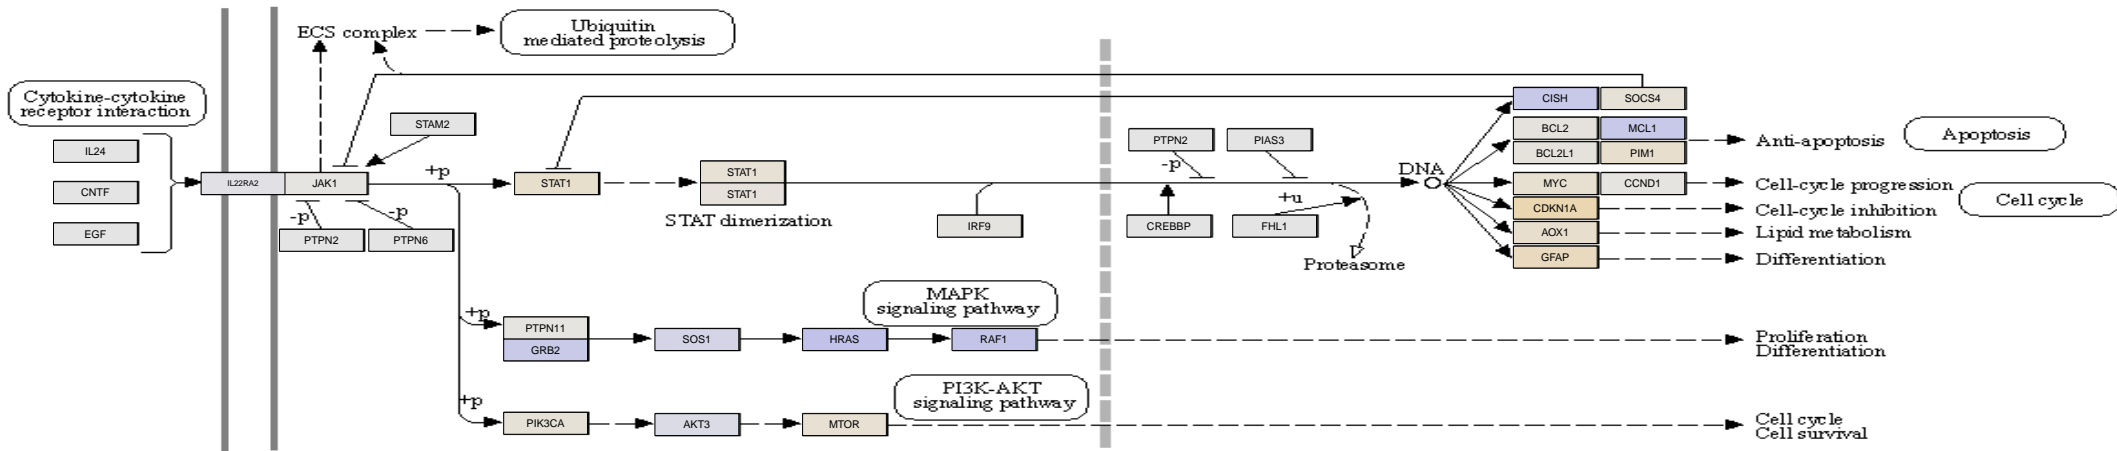

JAK\_STAT\_signaling\_pathway  
Teenager

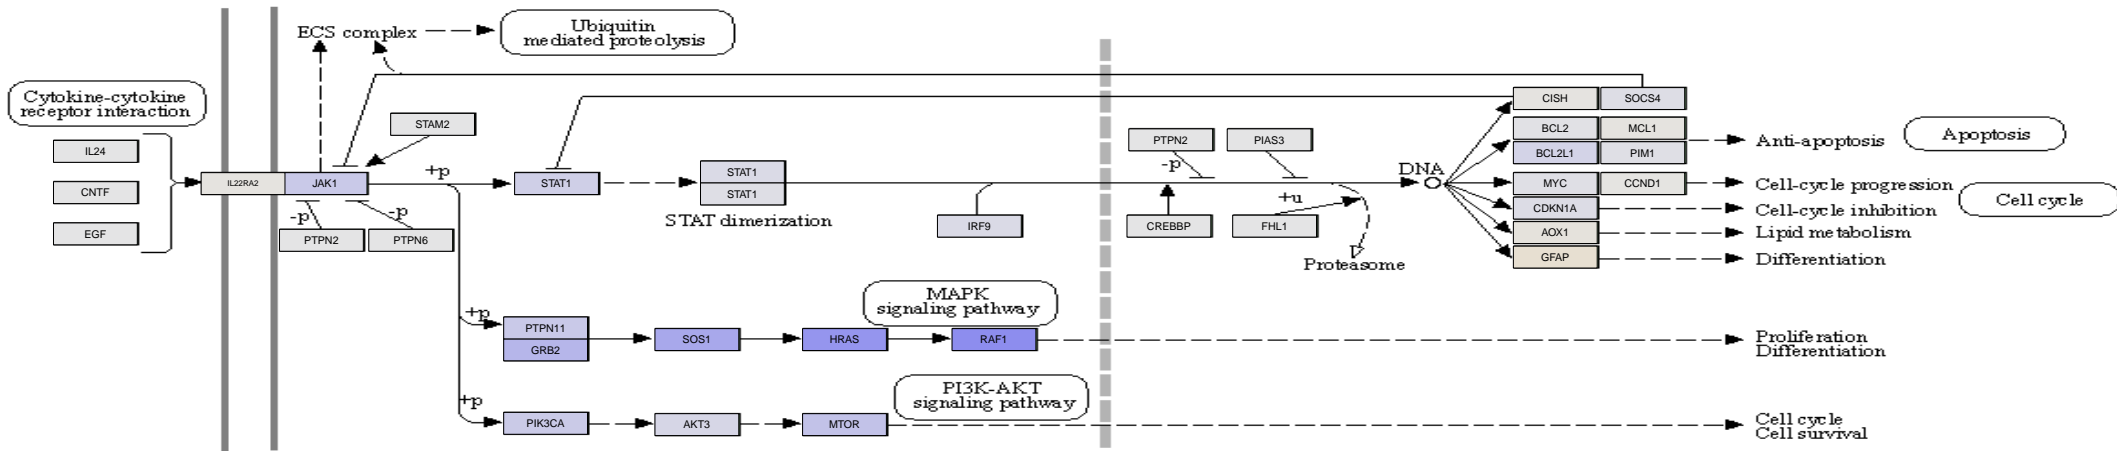



JAK\_STAT\_signaling\_pathway  
Adult

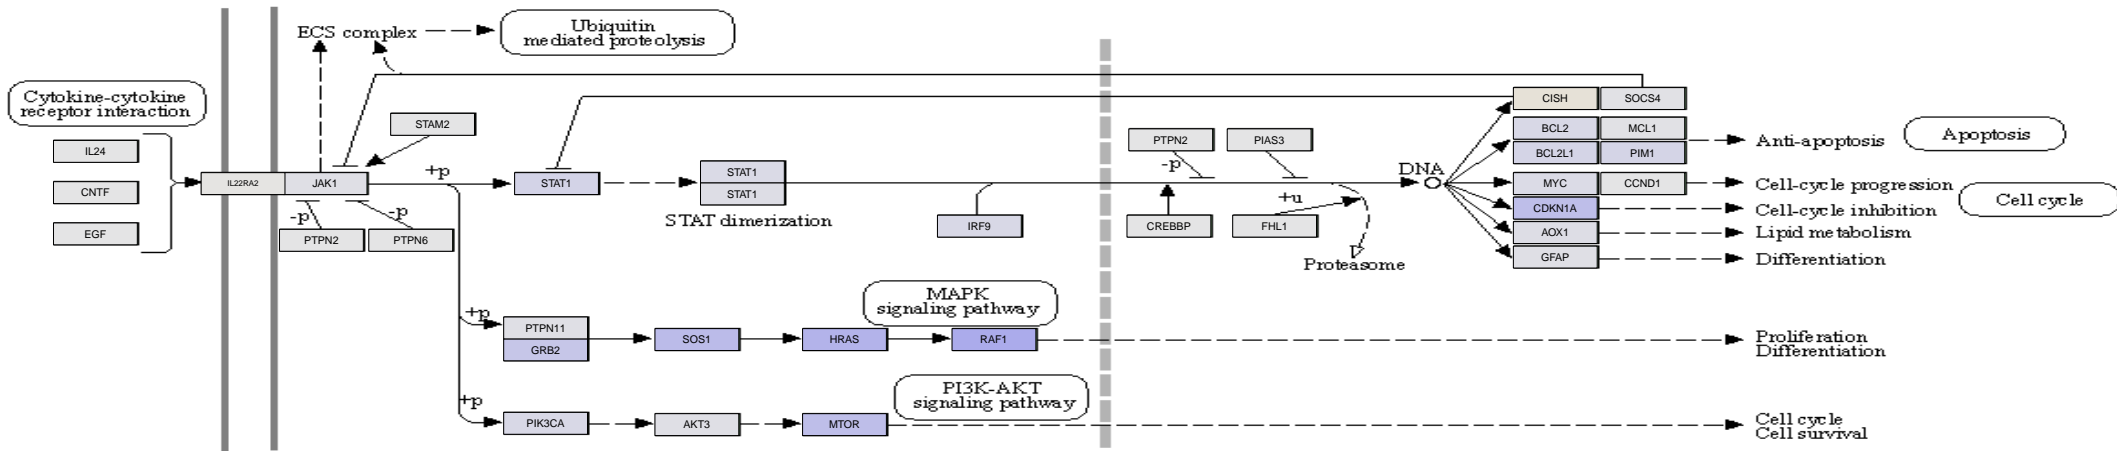

JAK\_STAT\_signaling\_pathway  
Late adult

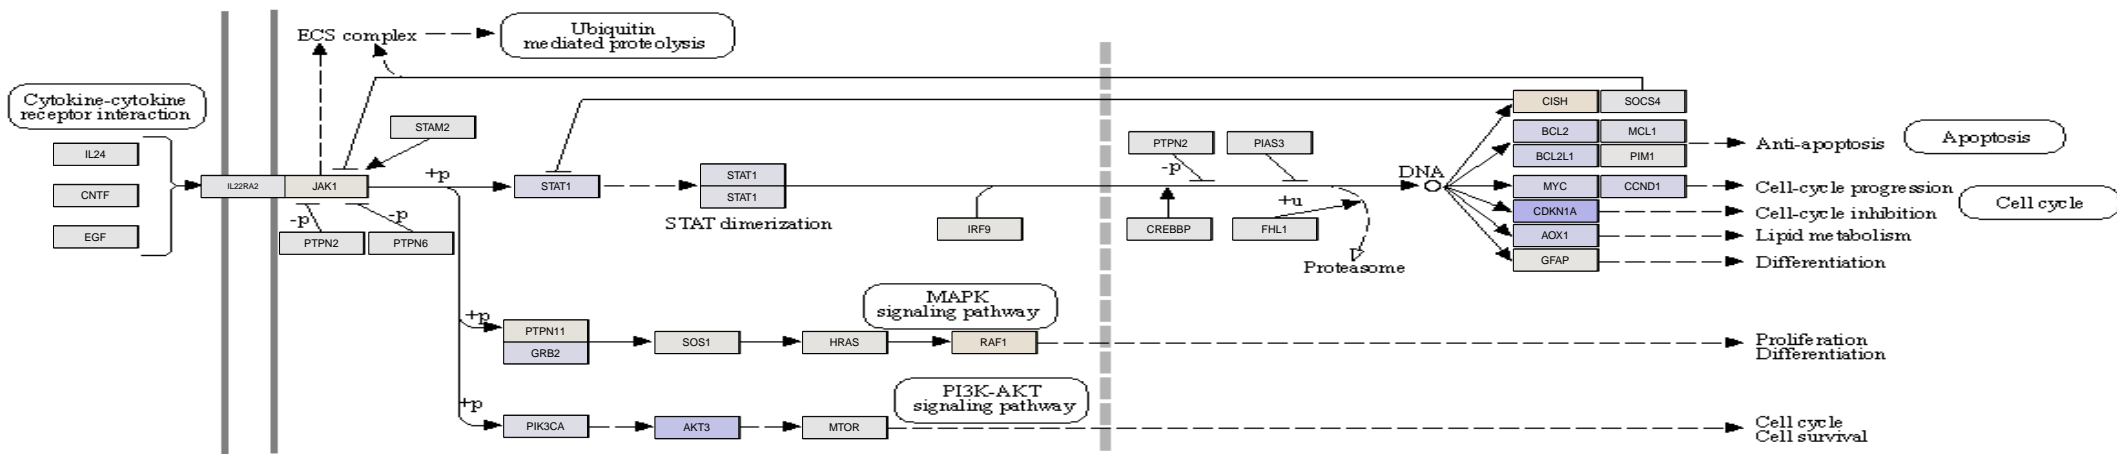

Supplement: s1 [file s1]
