# Supplementary material for: The Transcriptome and Methylome of the Developing and Aging Brain and Their Relations to Gliomas and Psychological Disorders
Source: MDPI journal article supplement (doi:10.3390/cells11030362), 2022-01-21

IL-17 signaling pathway

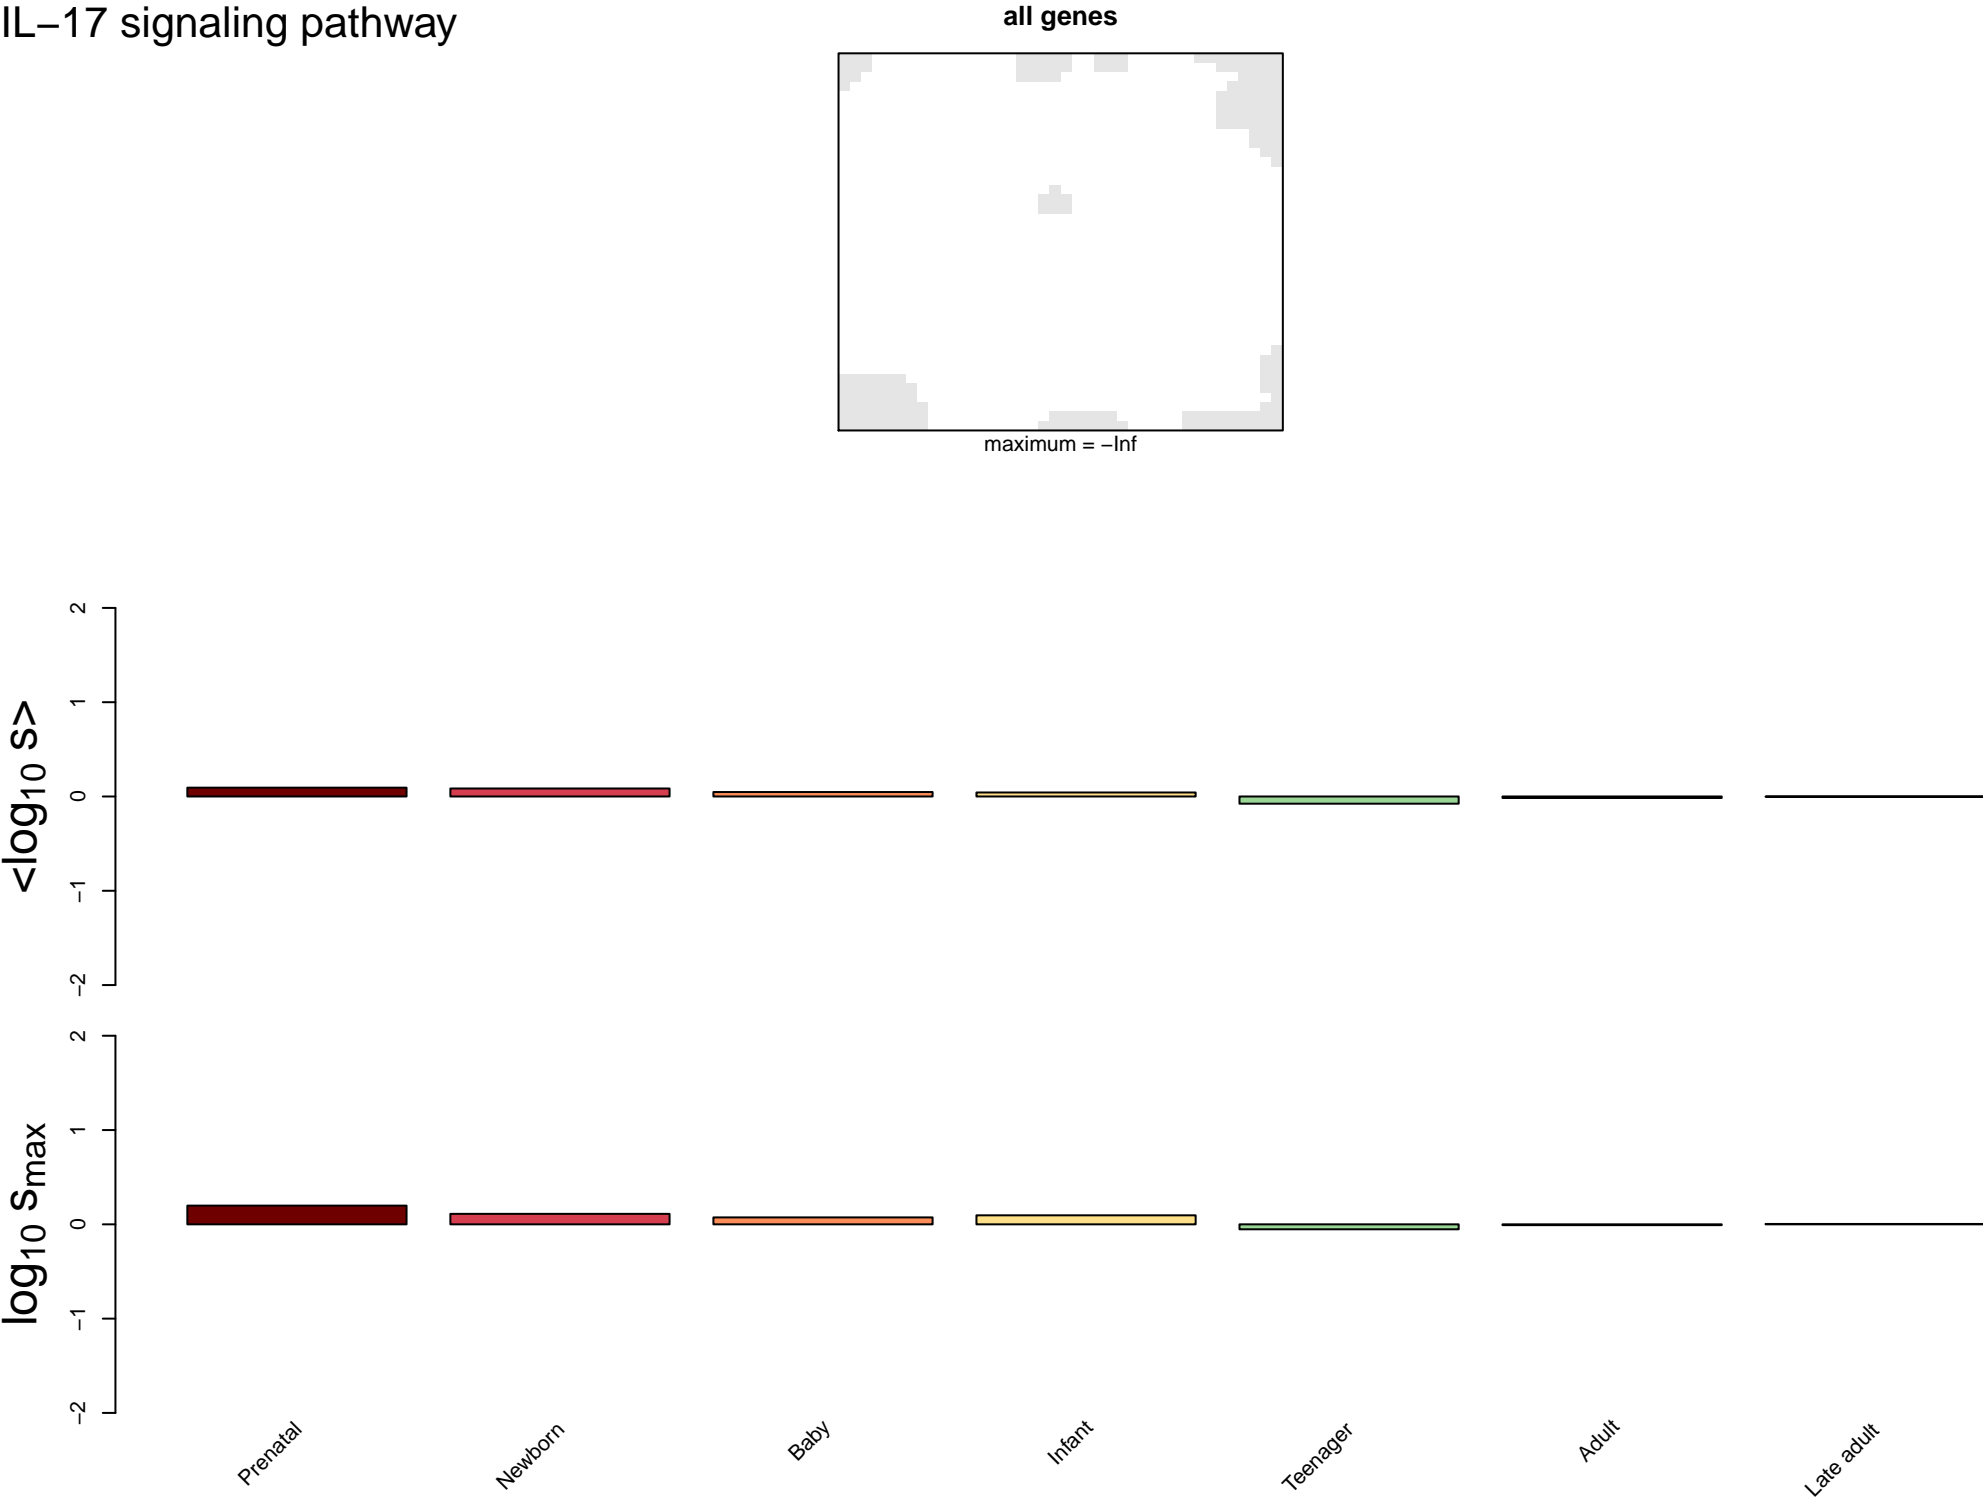

IL\_17\_signaling\_pathway  
genes with data

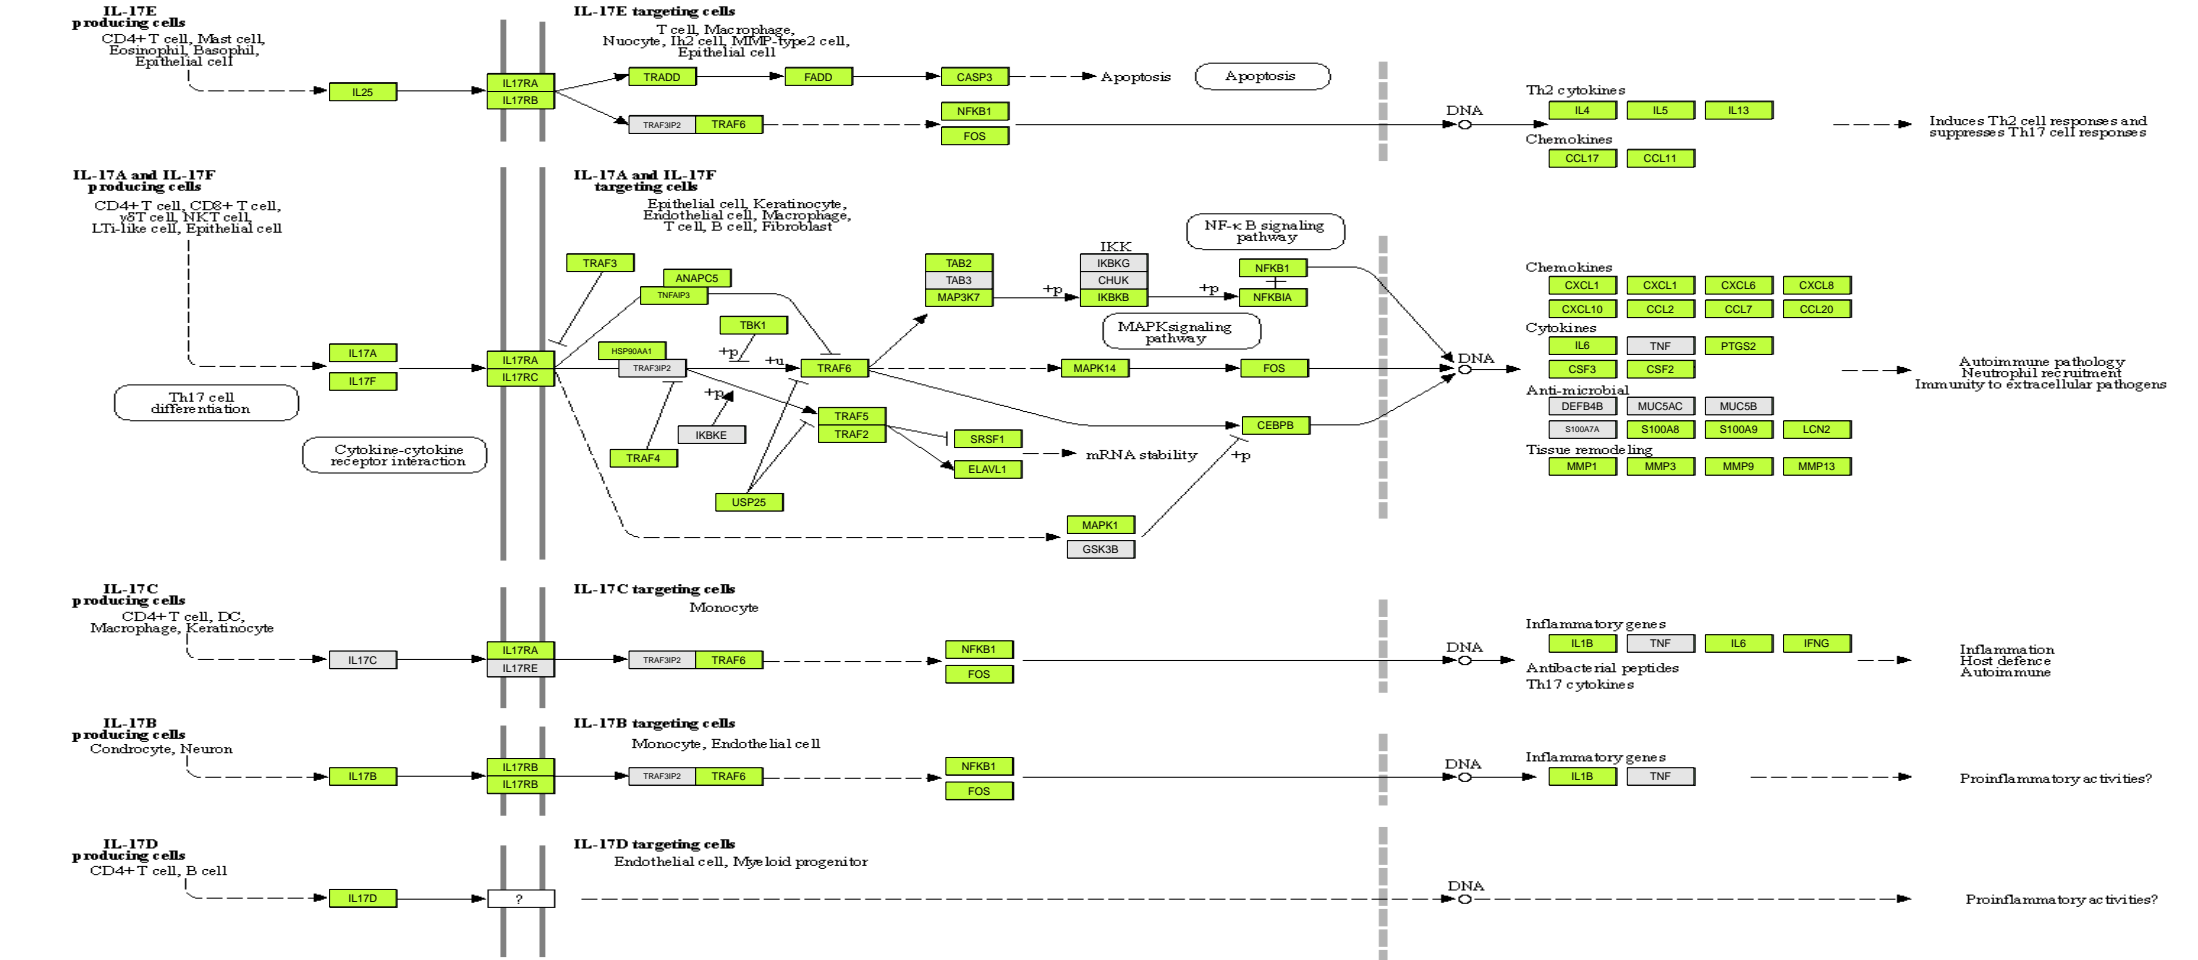

IL\_17\_signaling\_pathway  
sink nodes

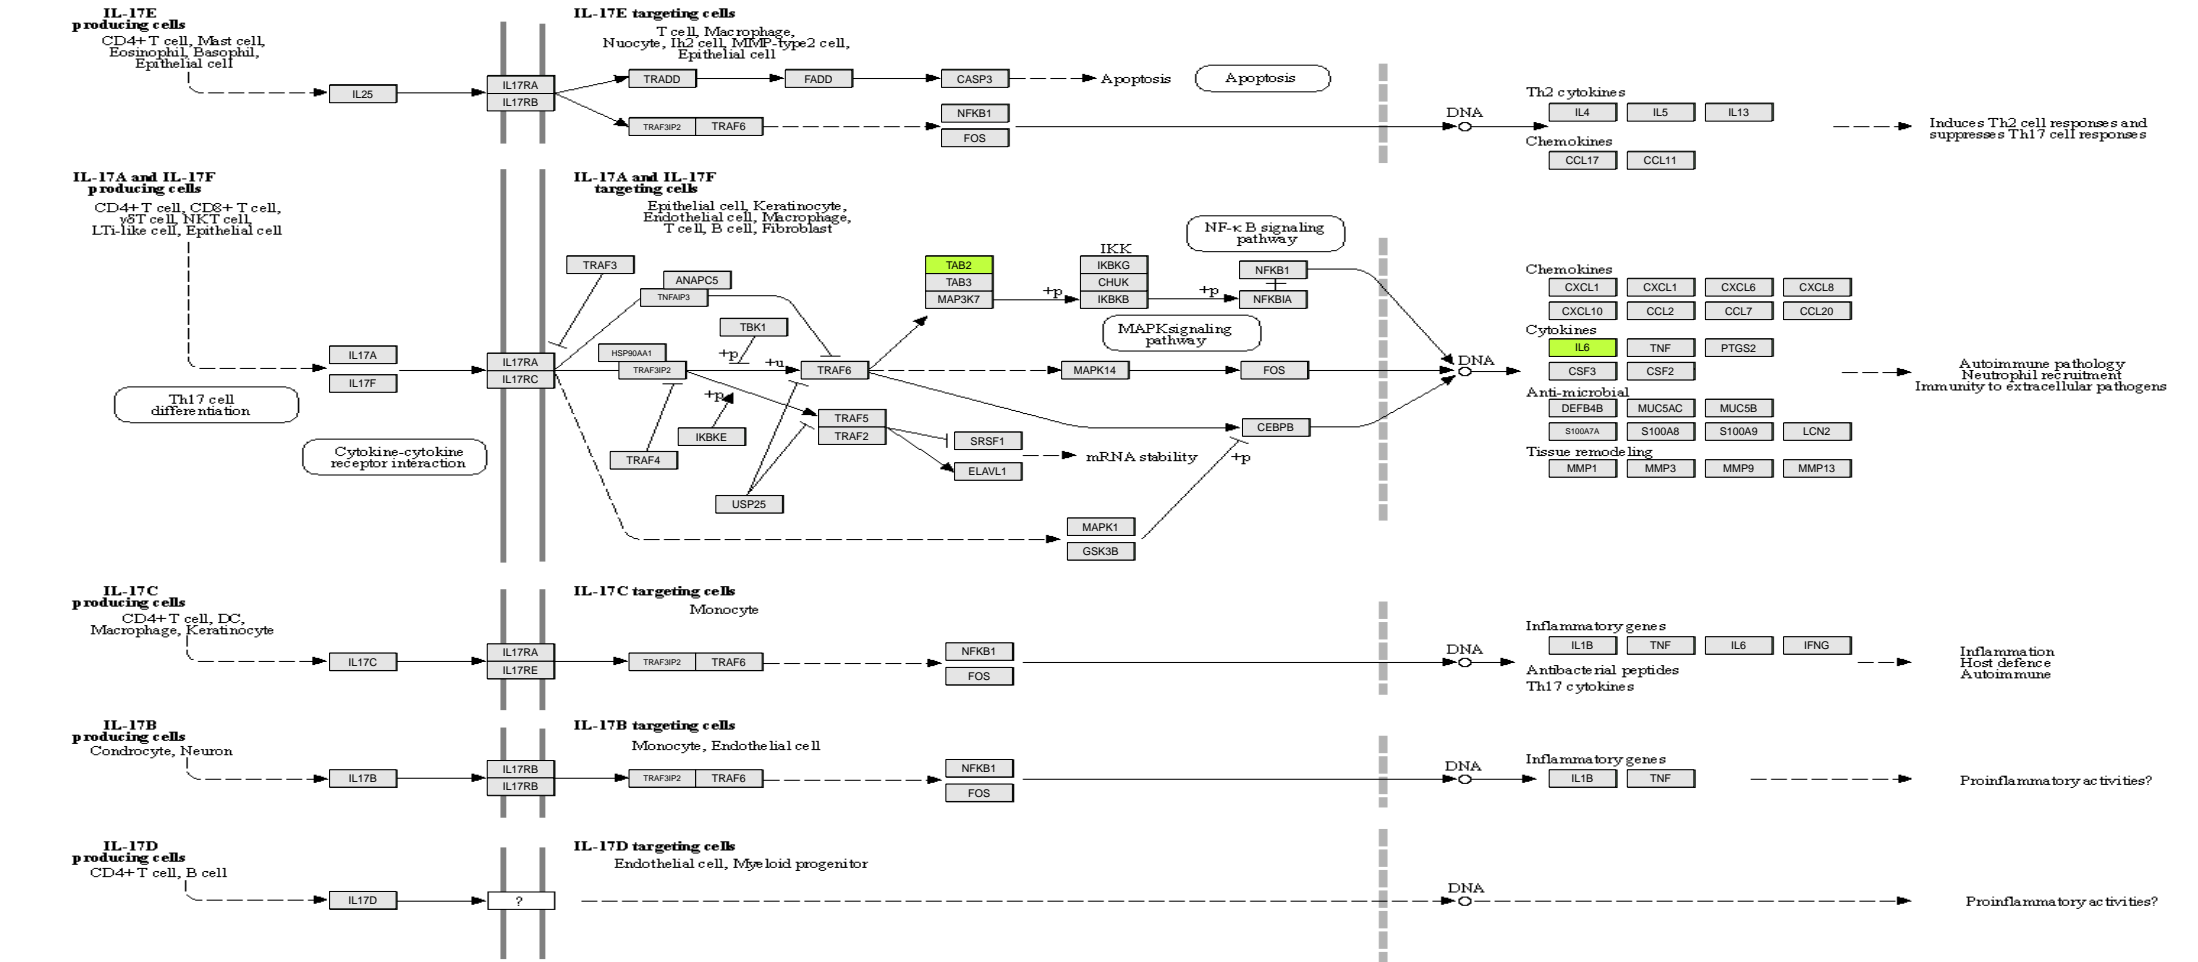

IL\_17\_signaling\_pathway  
Prenatal

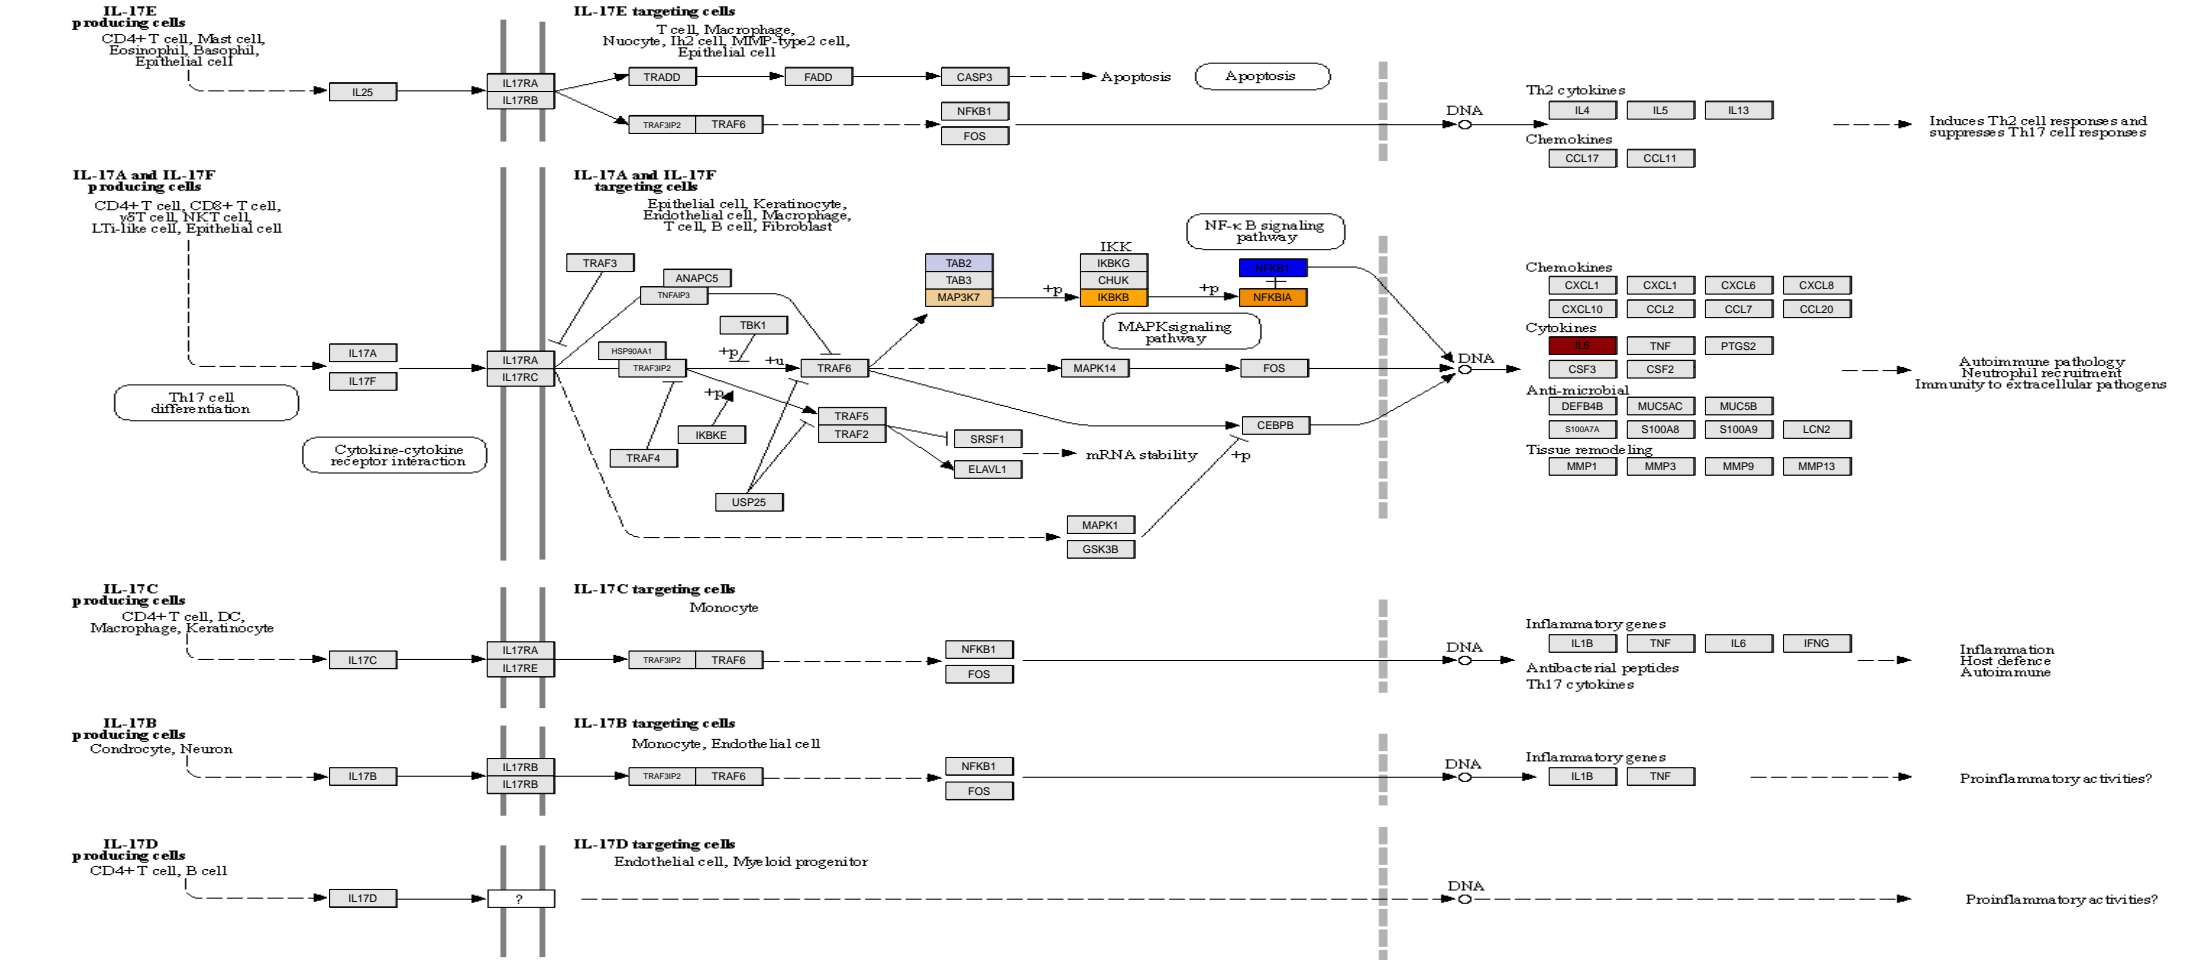

IL\_17\_signaling\_pathway  
Newborn

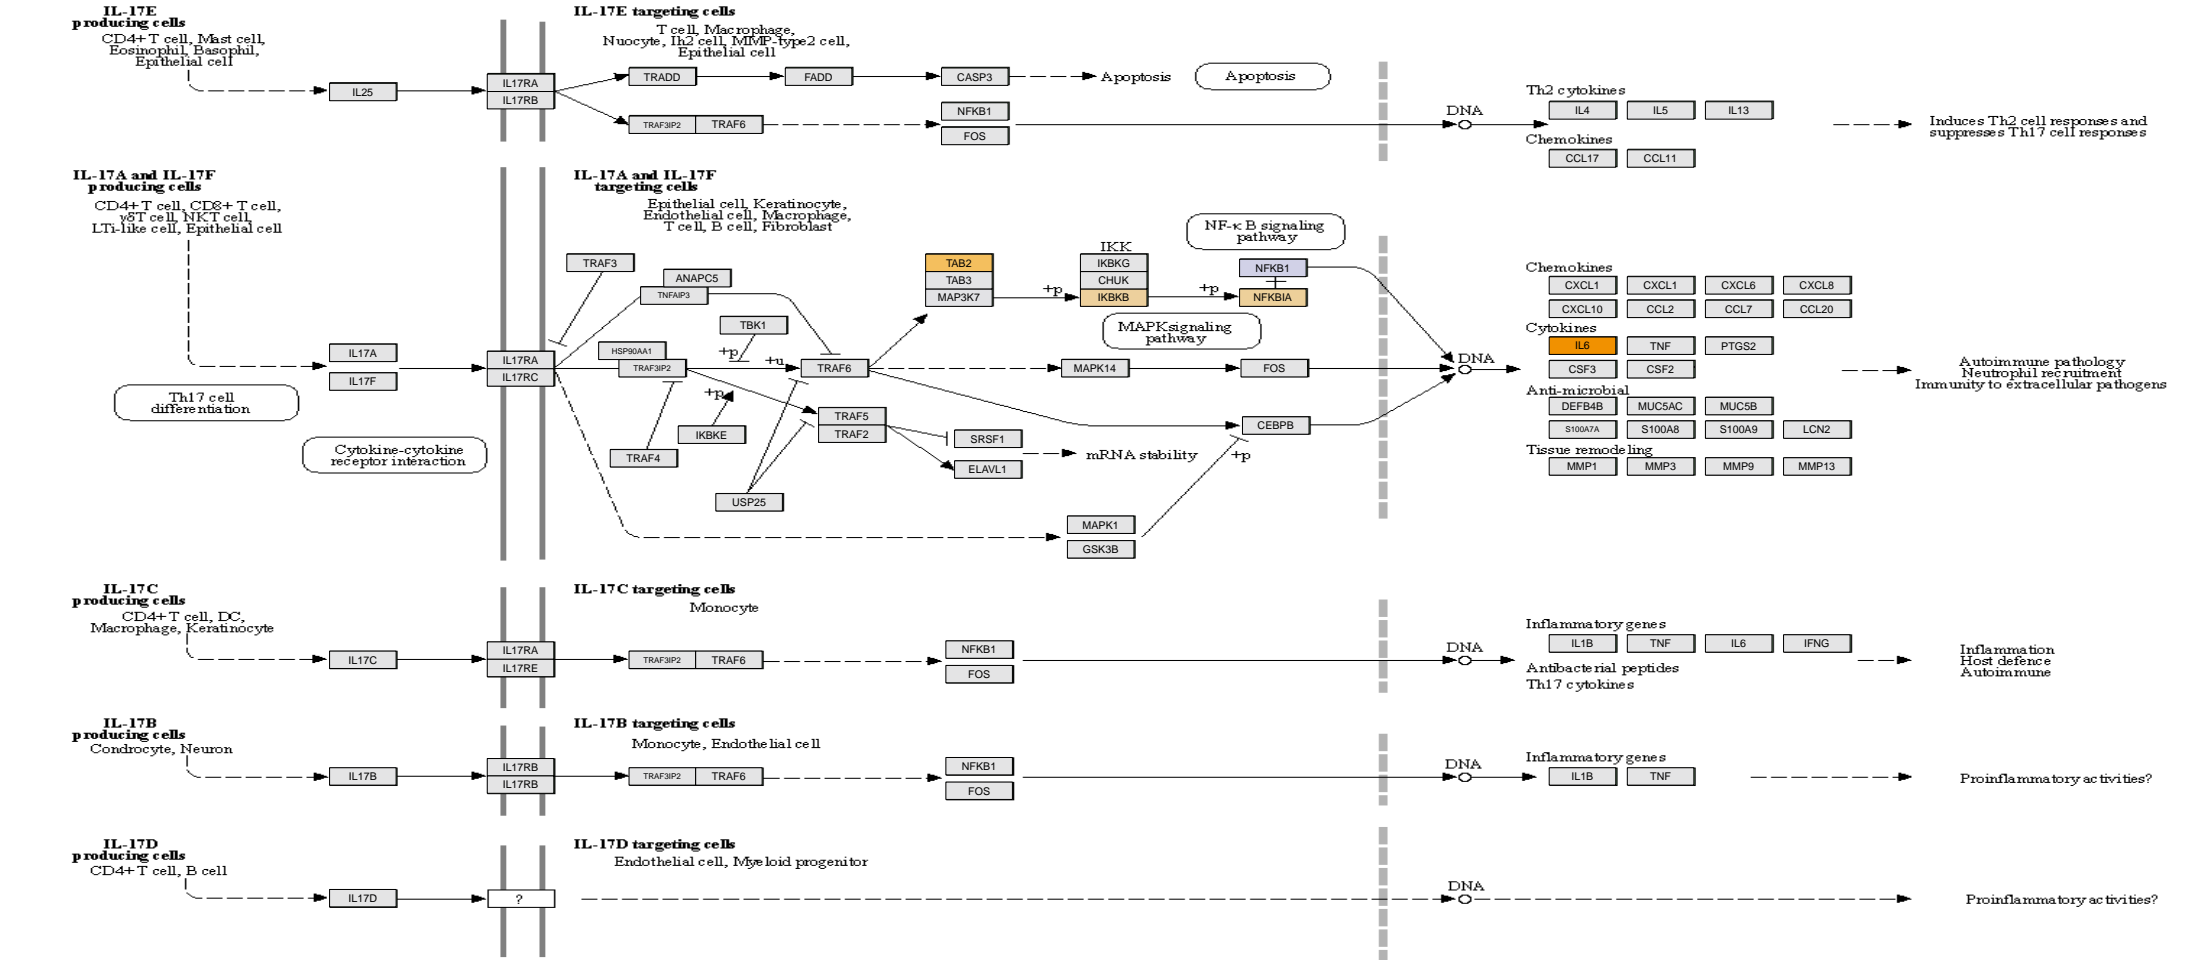



IL\_17\_signaling\_pathway Infant

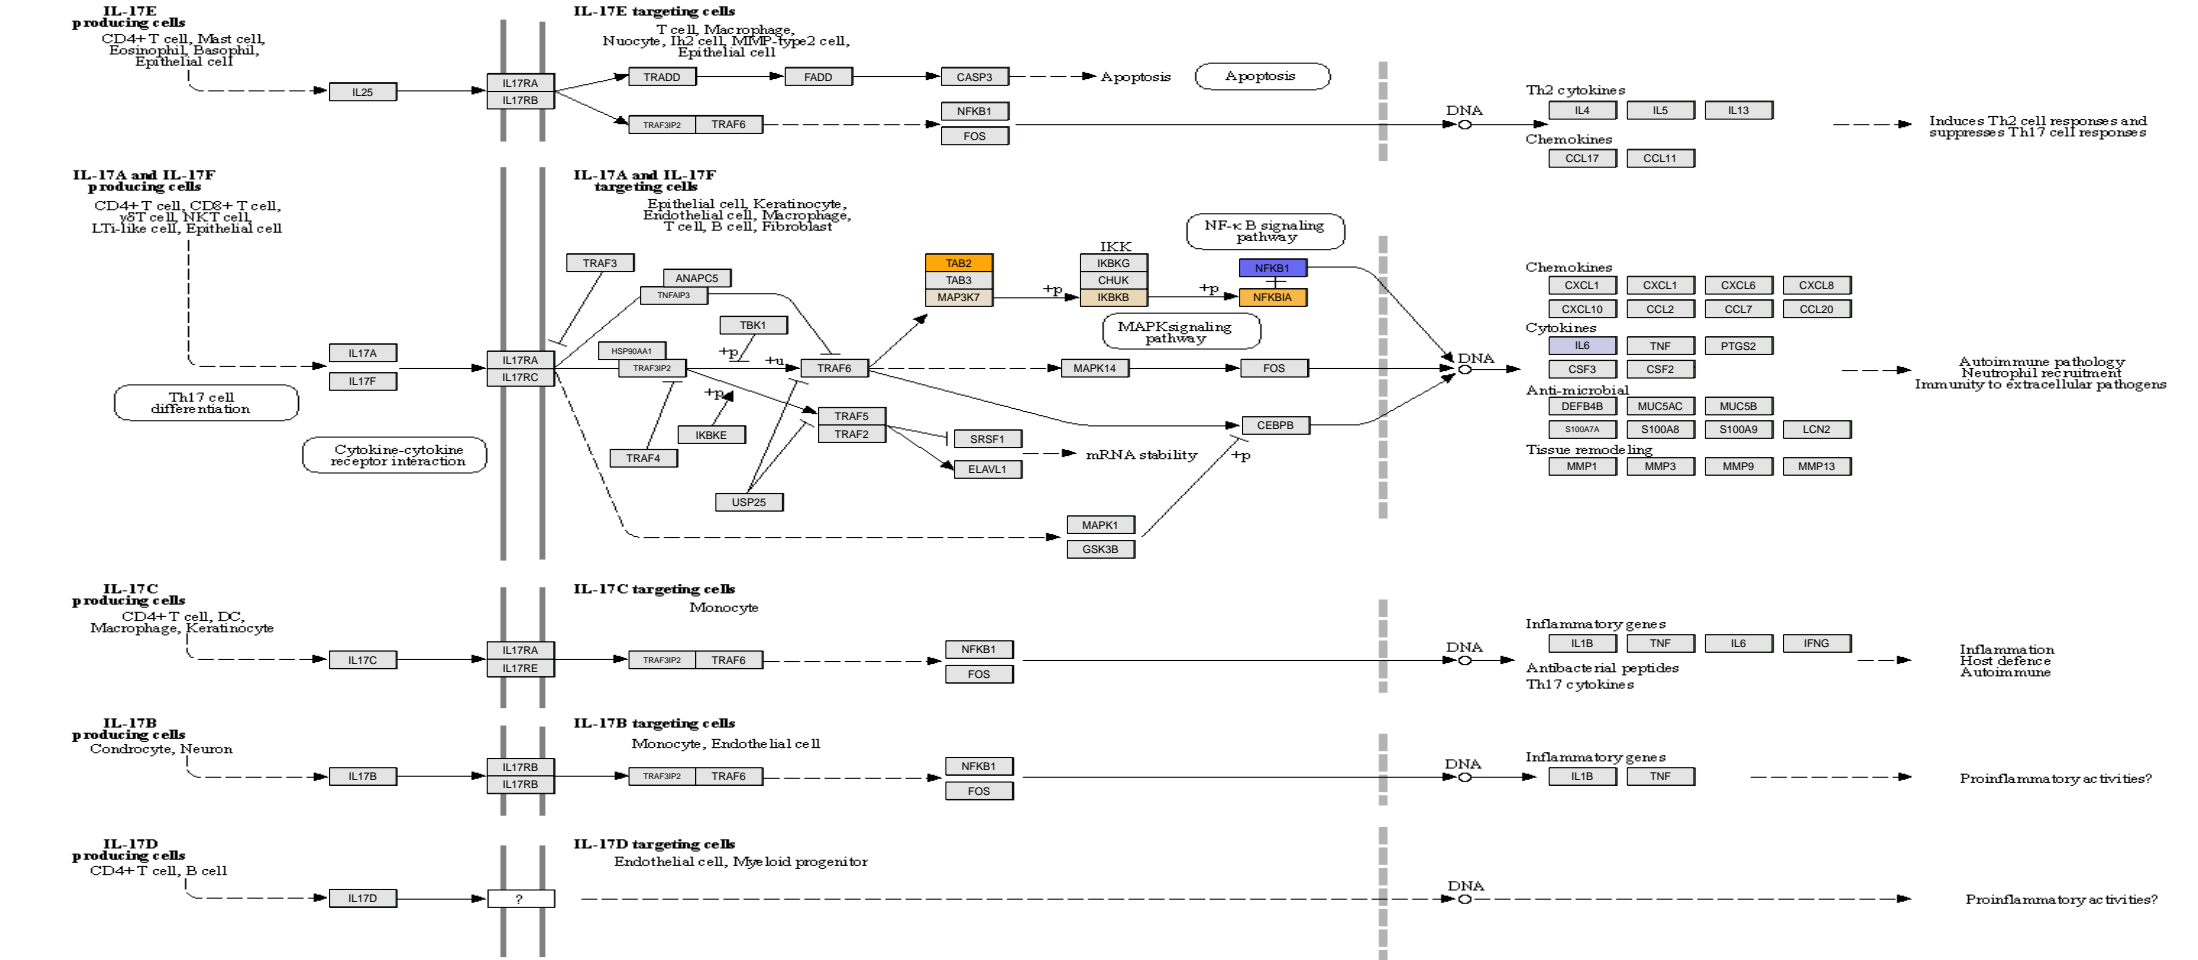





IL\_17\_signaling\_pathway  
Adult

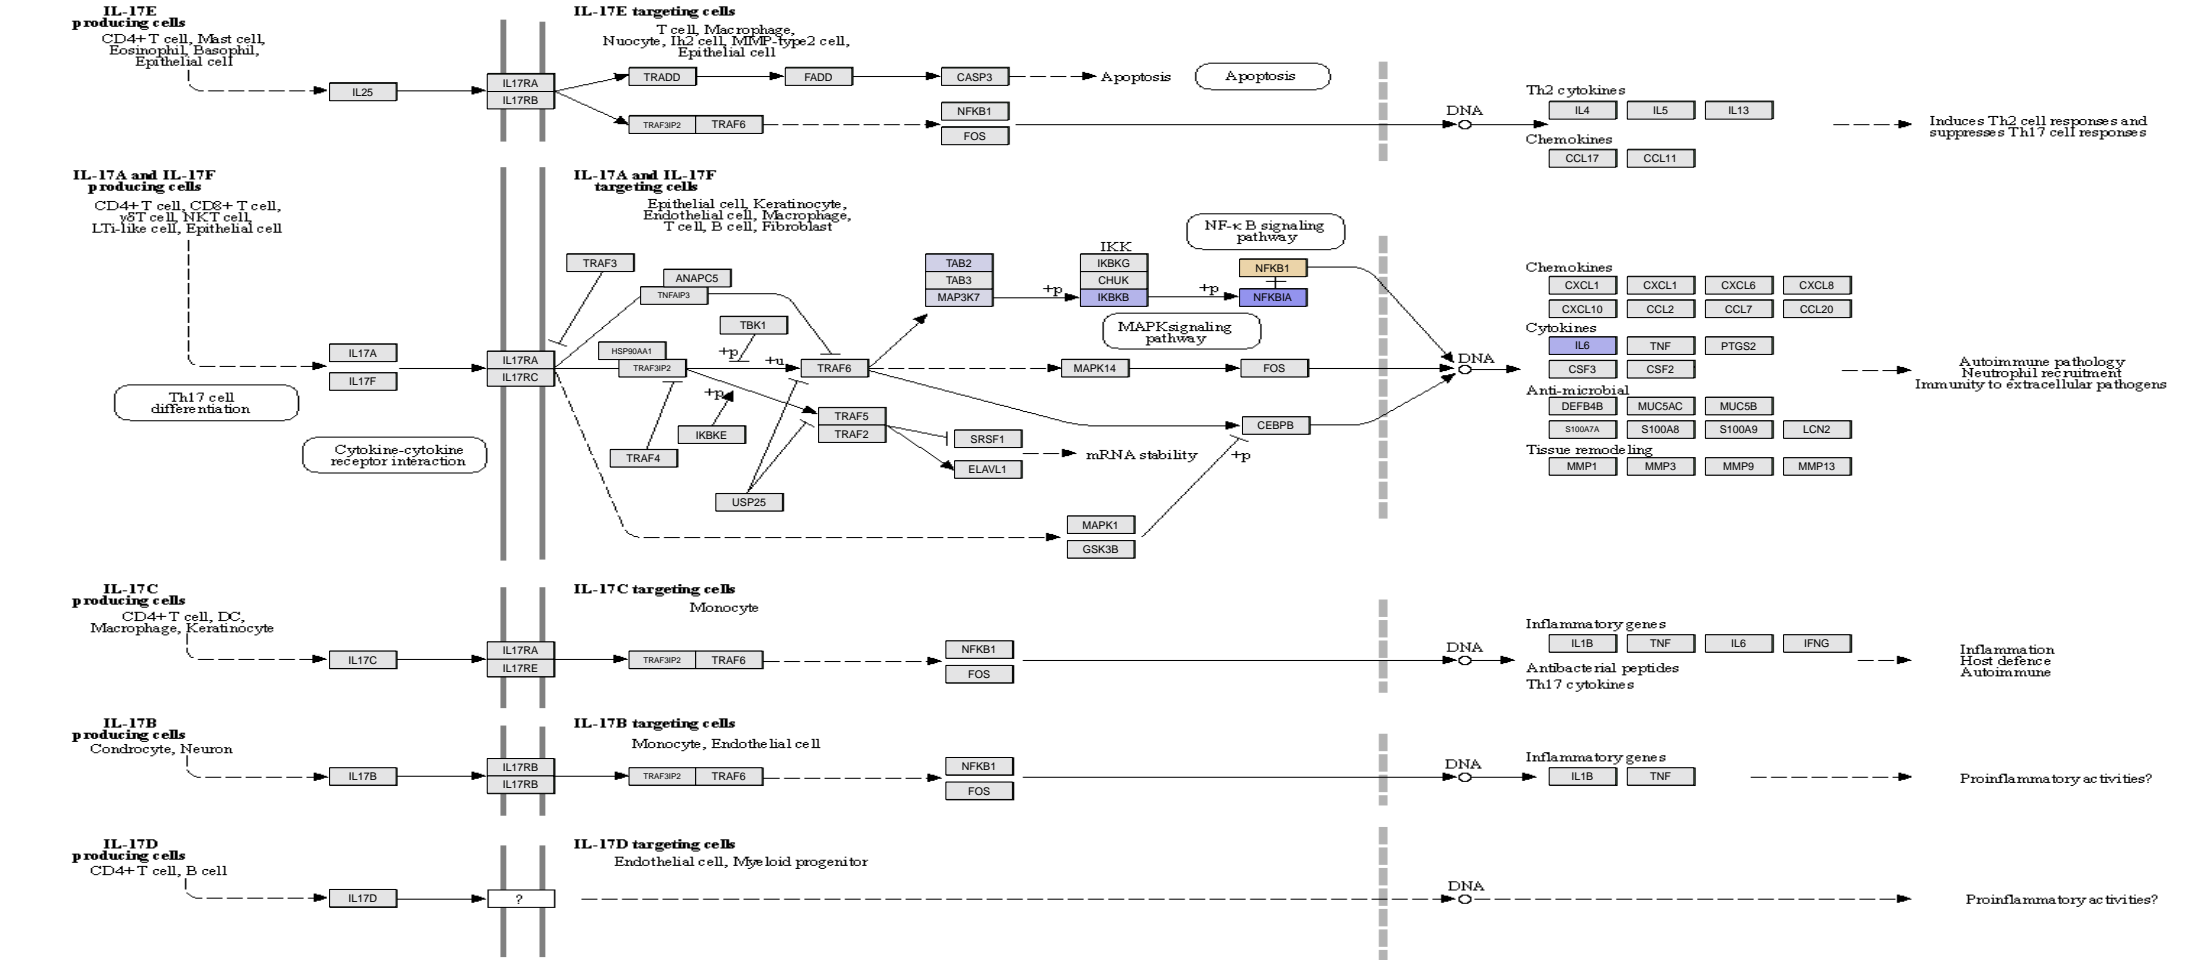

IL\_17\_signaling\_pathway  
Late adult

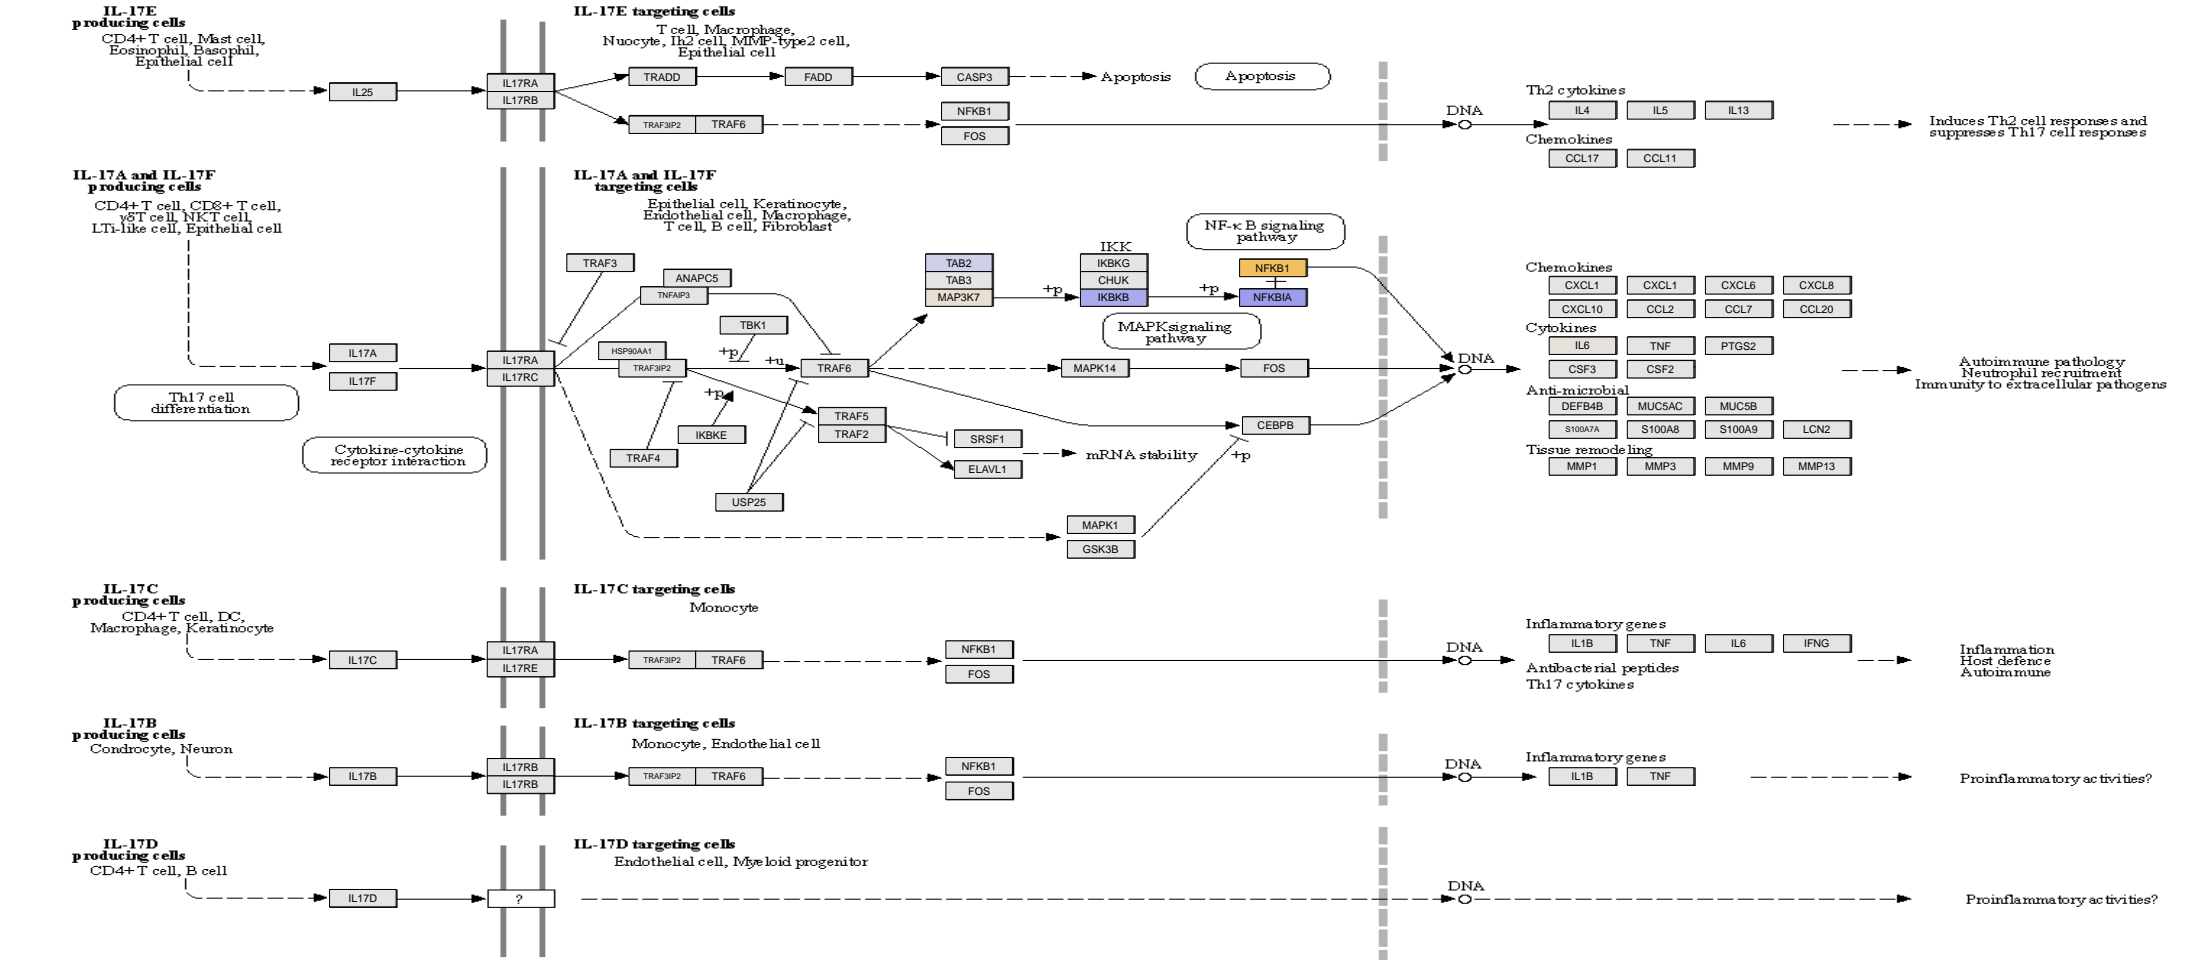

Supplement: s1 [file s1]
