# Supplementary material for: The Transcriptome and Methylome of the Developing and Aging Brain and Their Relations to Gliomas and Psychological Disorders
Source: MDPI journal article supplement (doi:10.3390/cells11030362), 2022-01-21

Relaxin signaling pathway

all genes

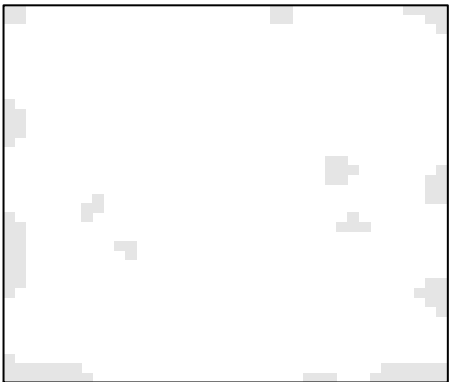

maximum = -Inf

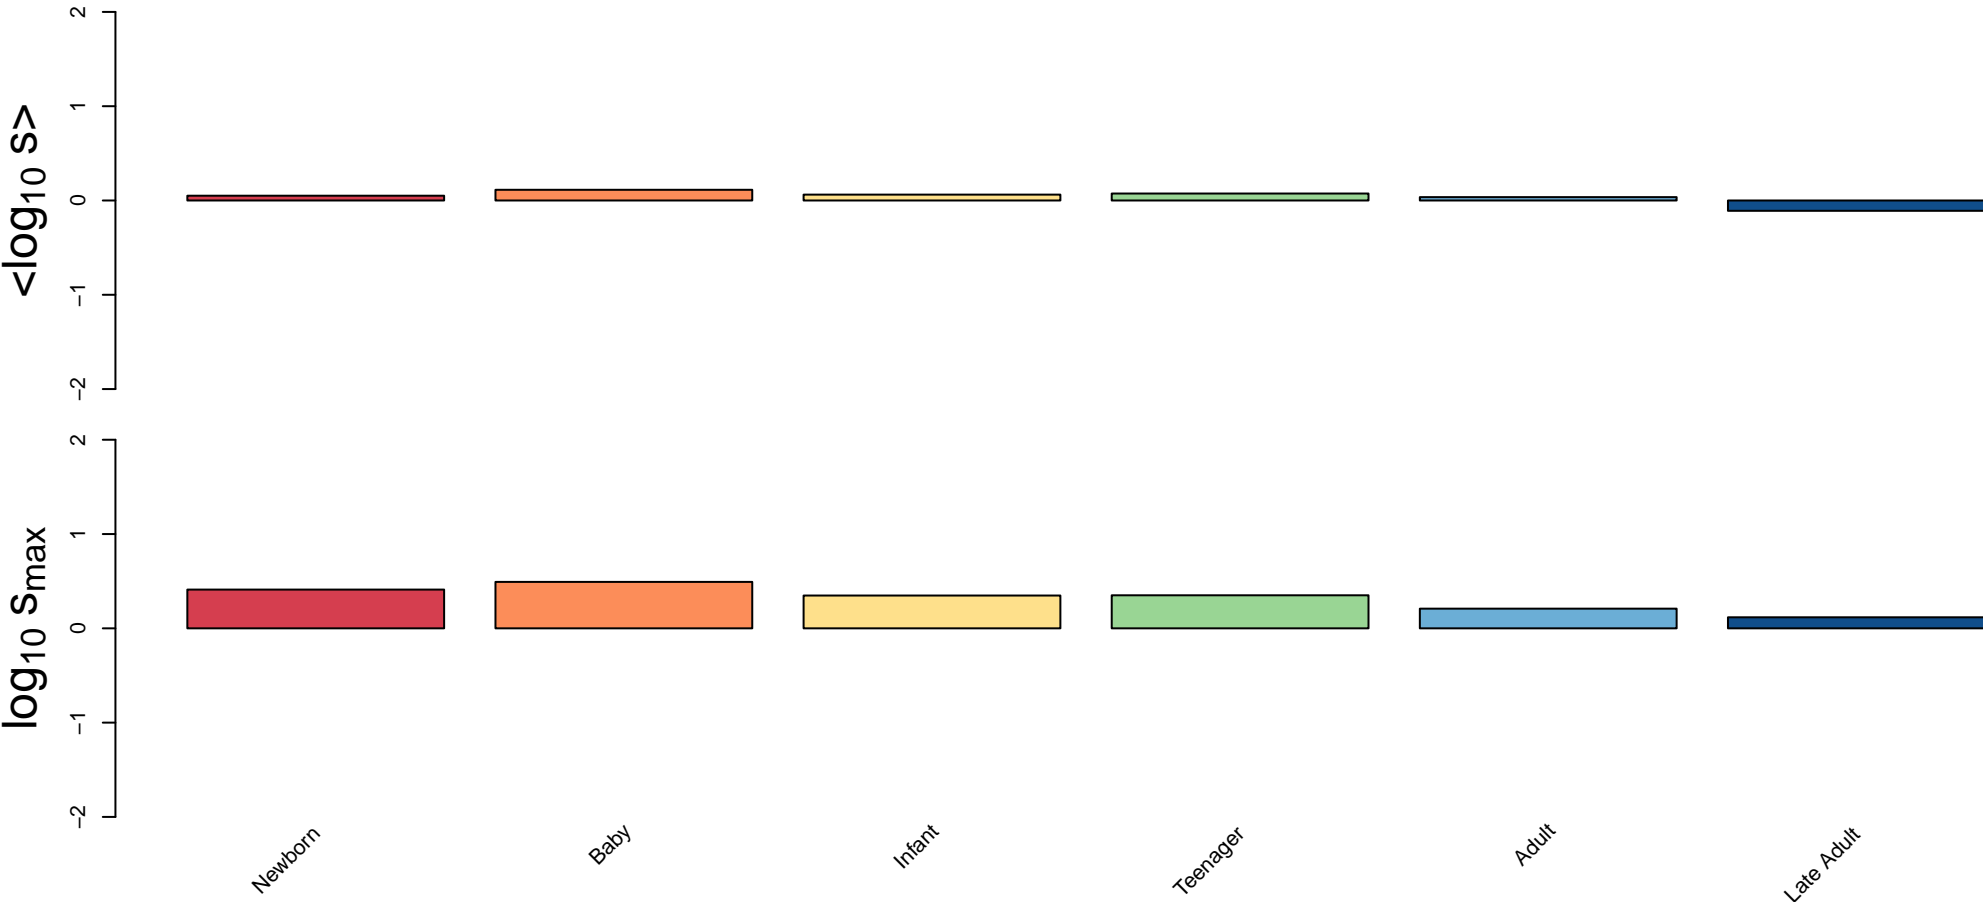

Relaxin signaling pathway  
genes with data

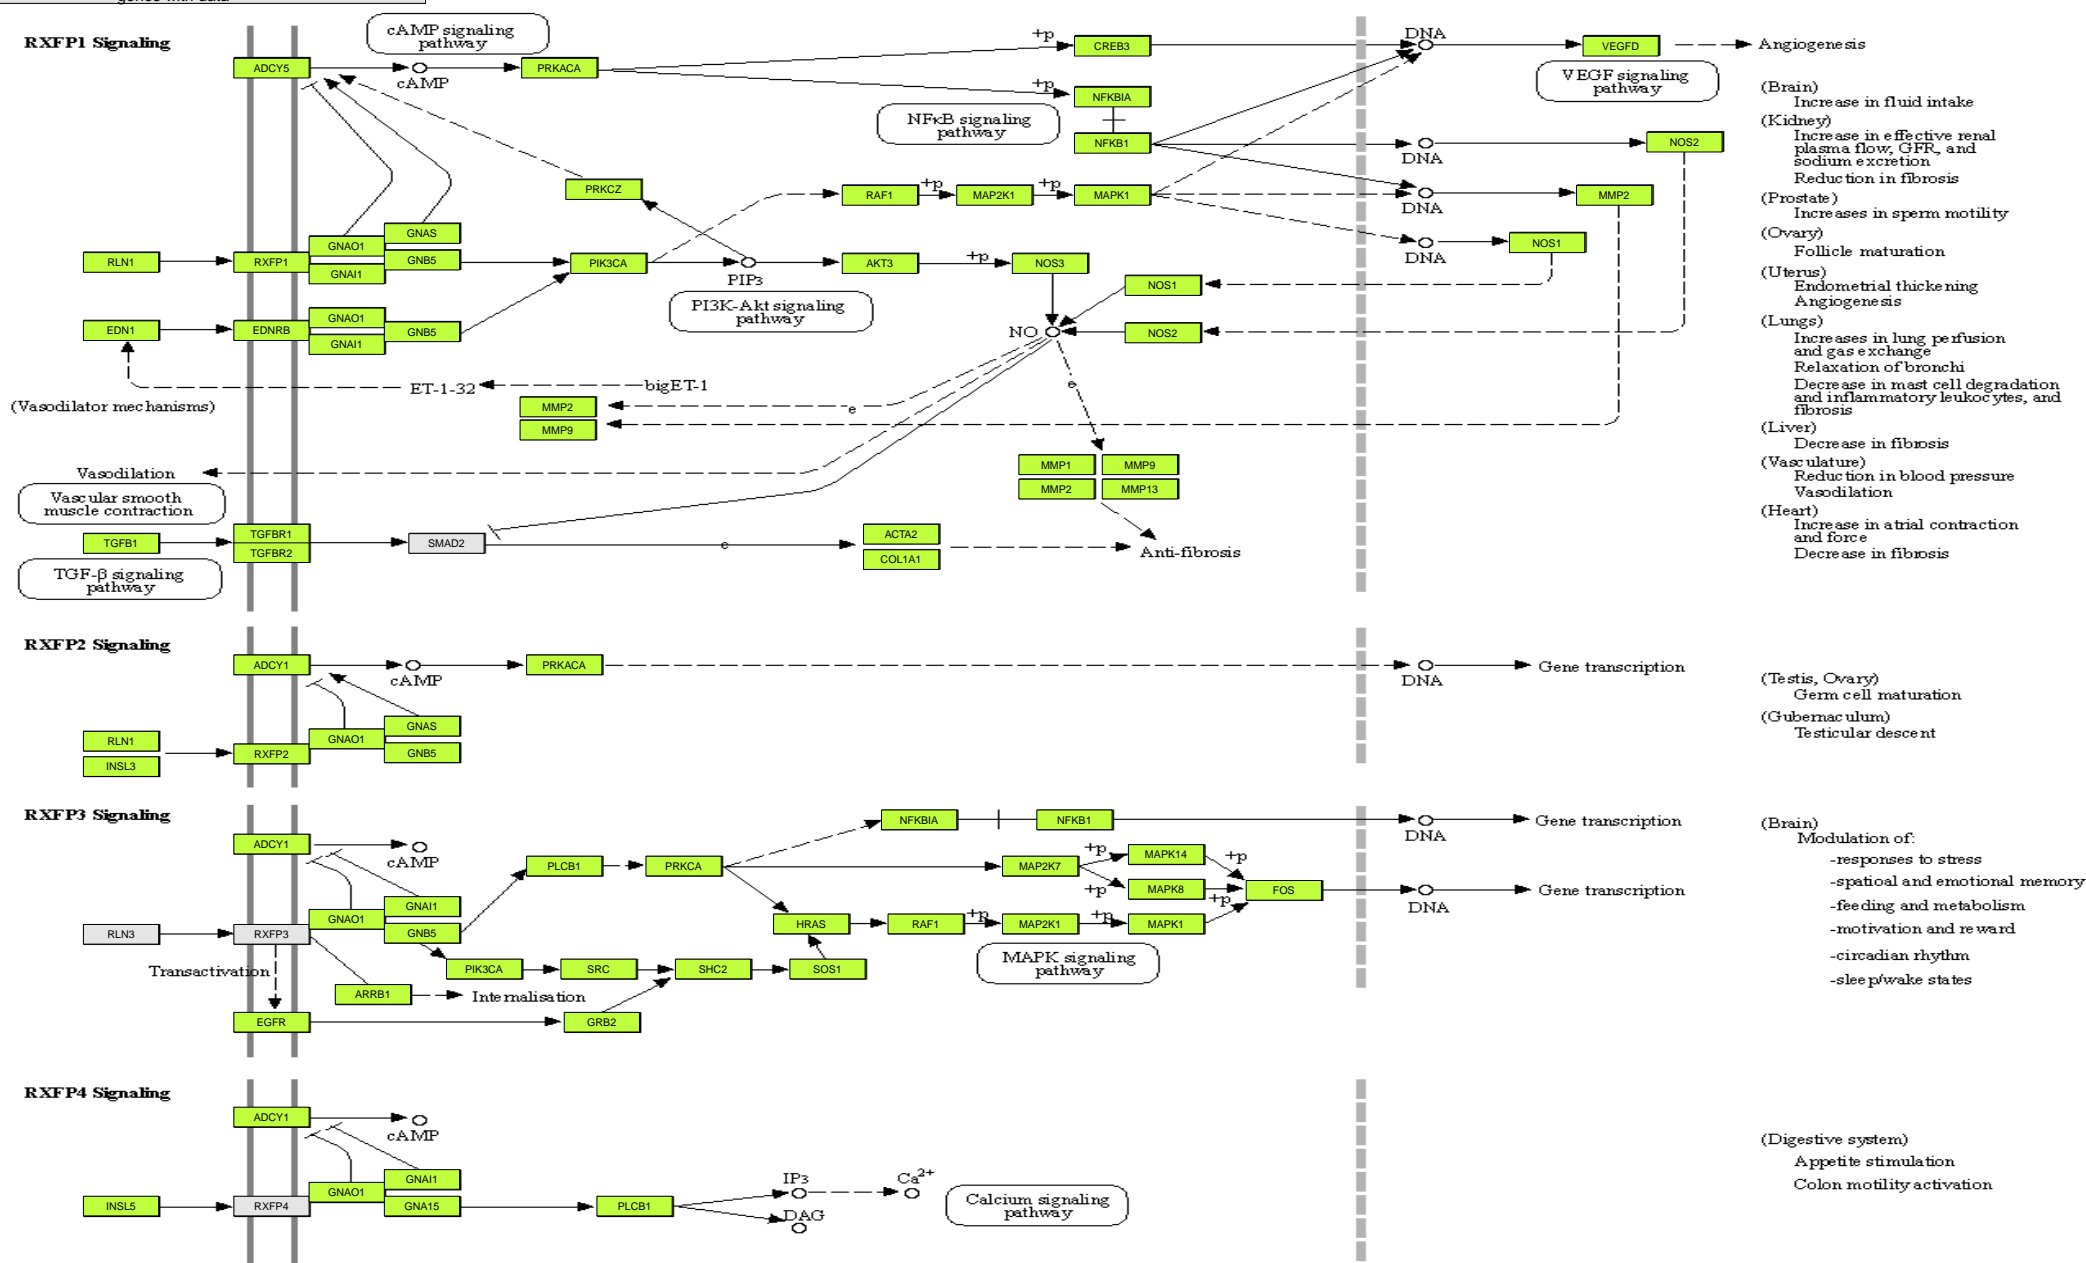



# Relaxin signaling pathway Newborn

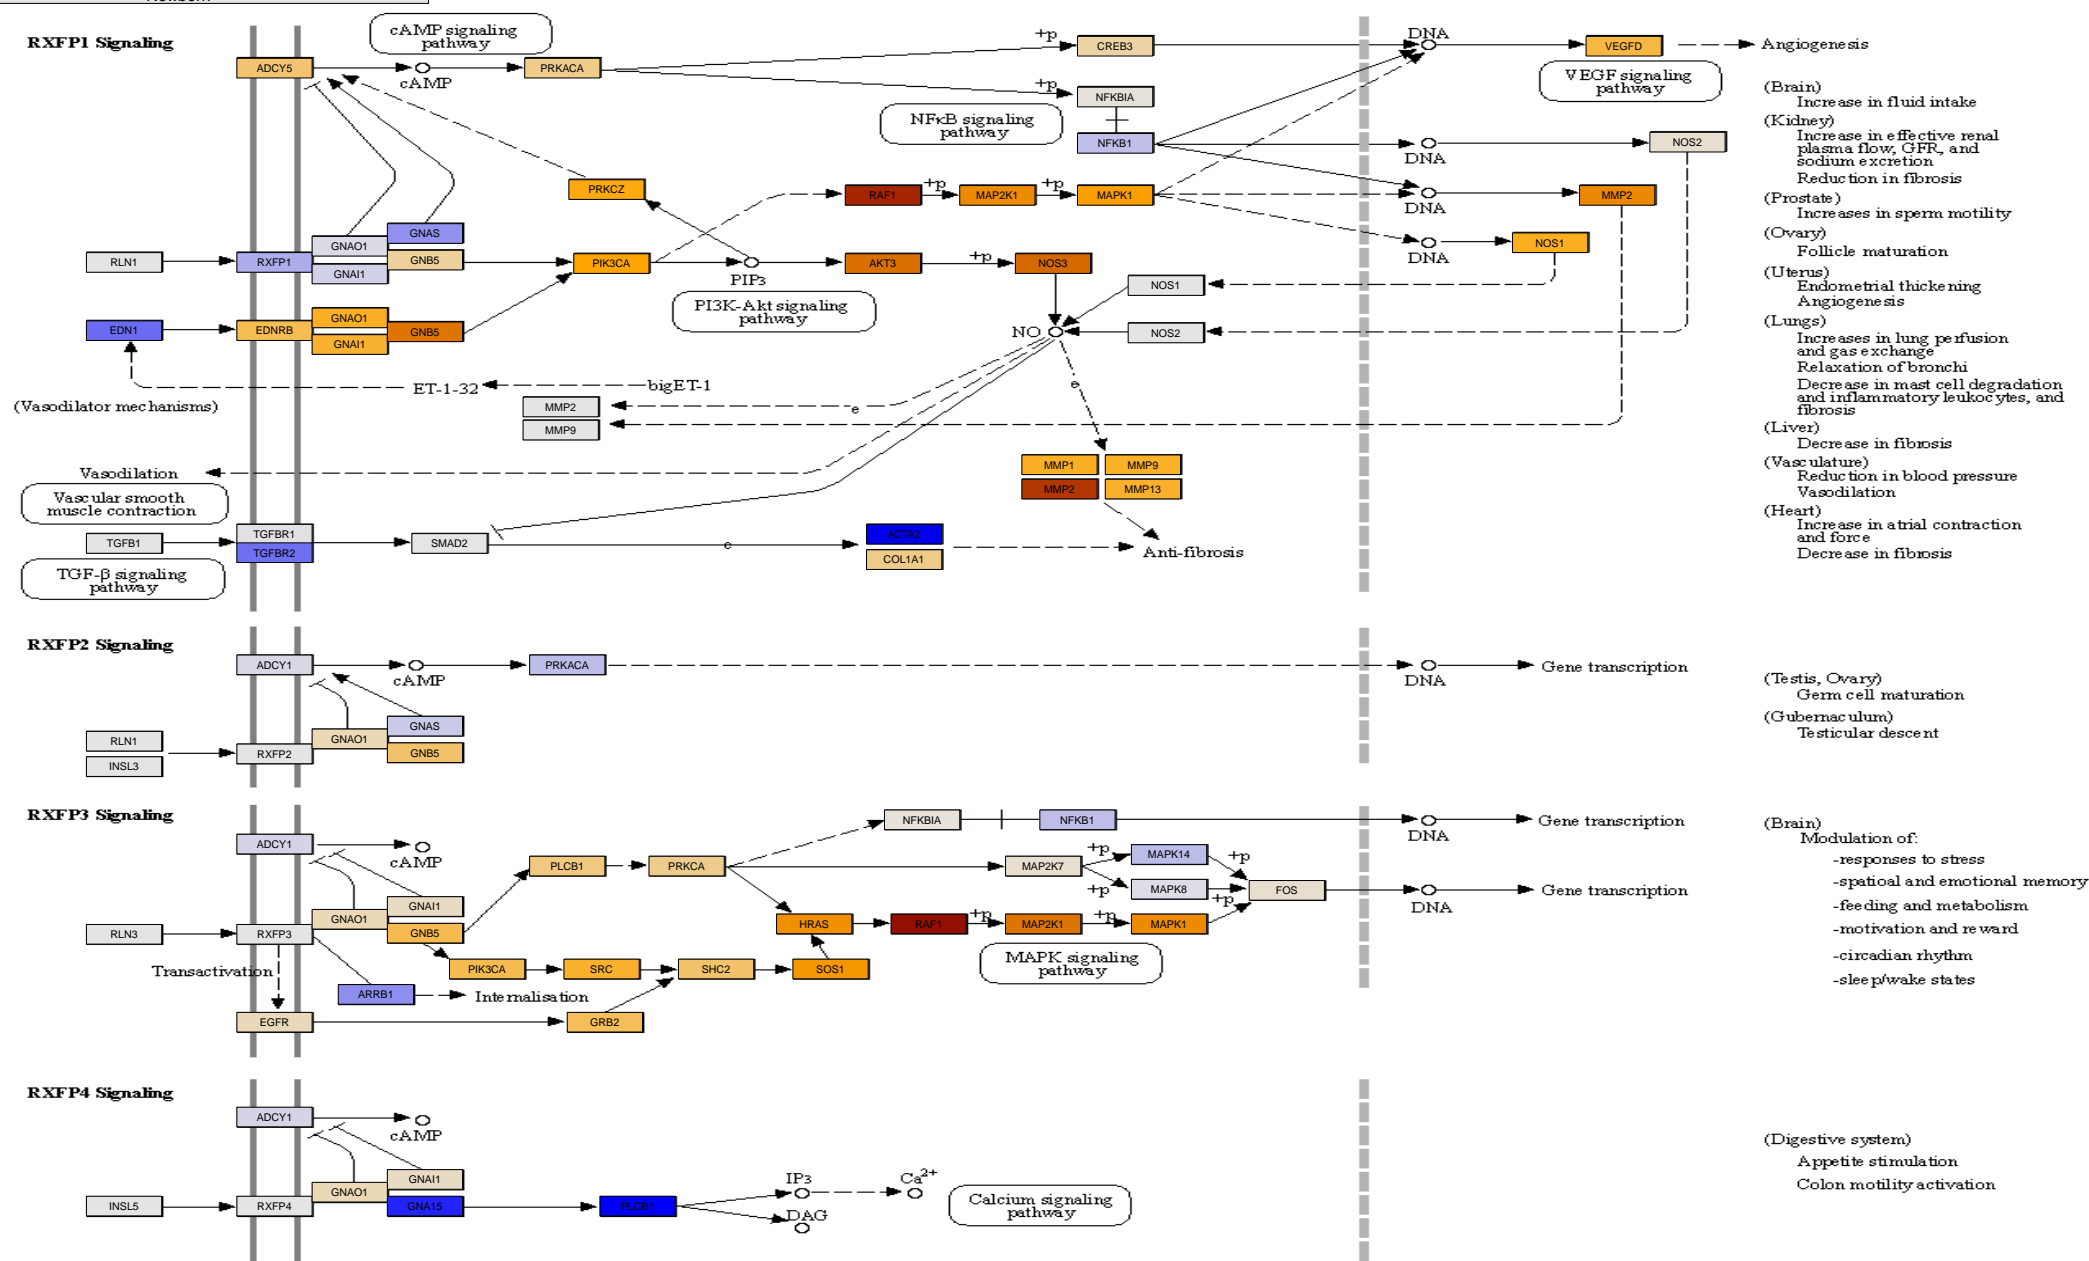

# Relaxin signaling pathway

Baby

## RXFP1 Signaling

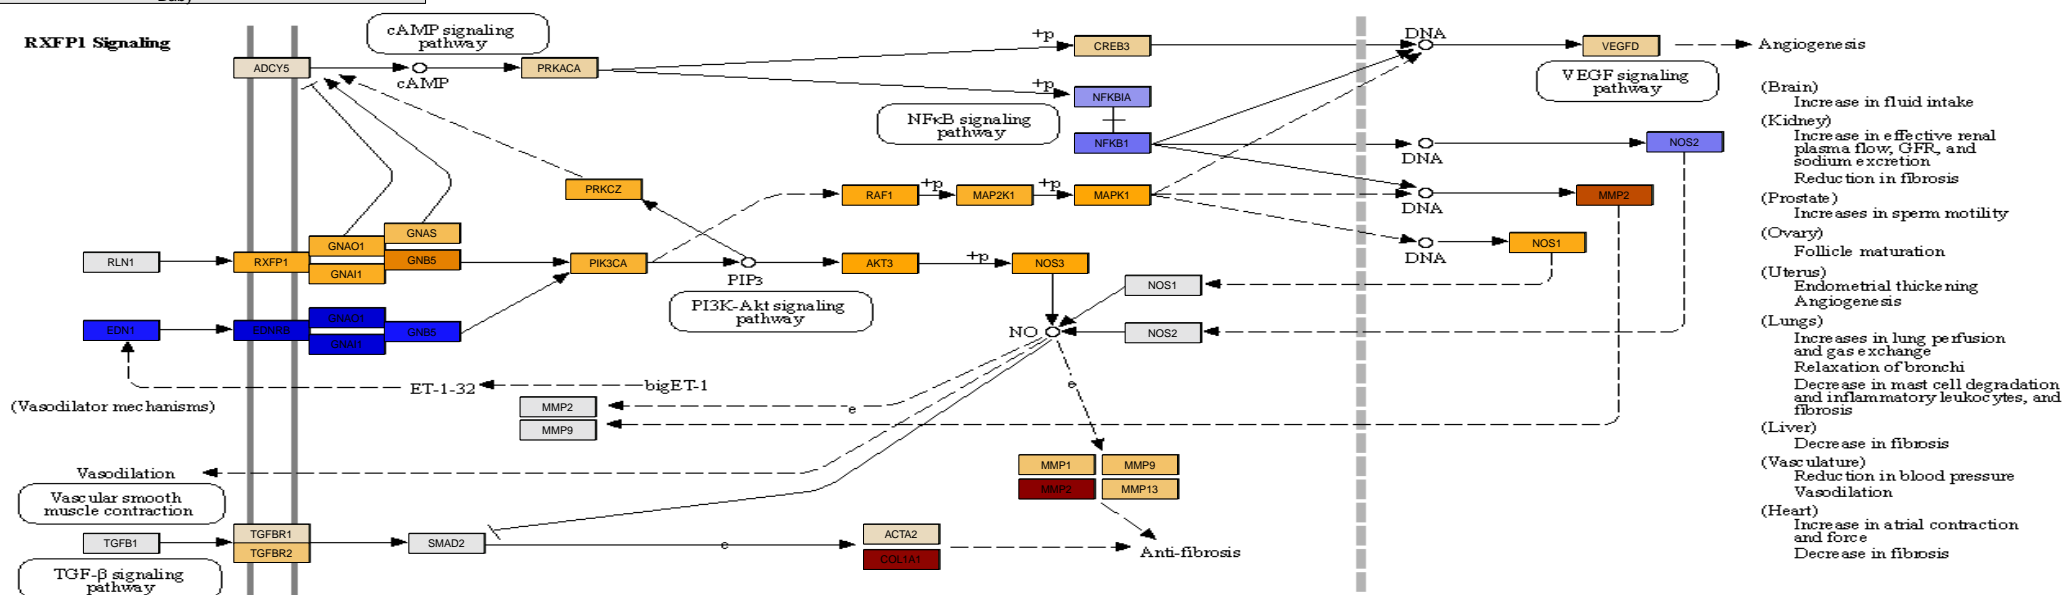

## RXFP2 Signaling

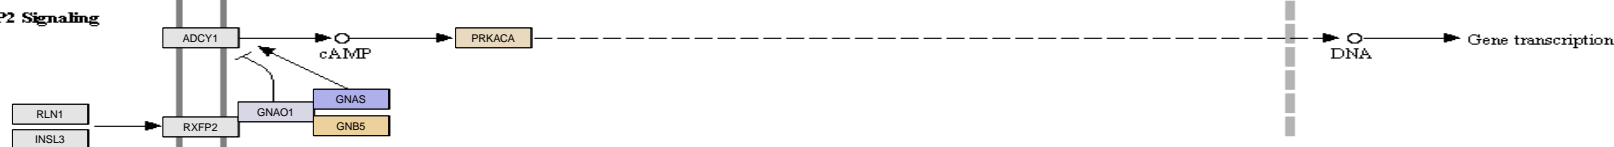

## RXFP3 Signaling

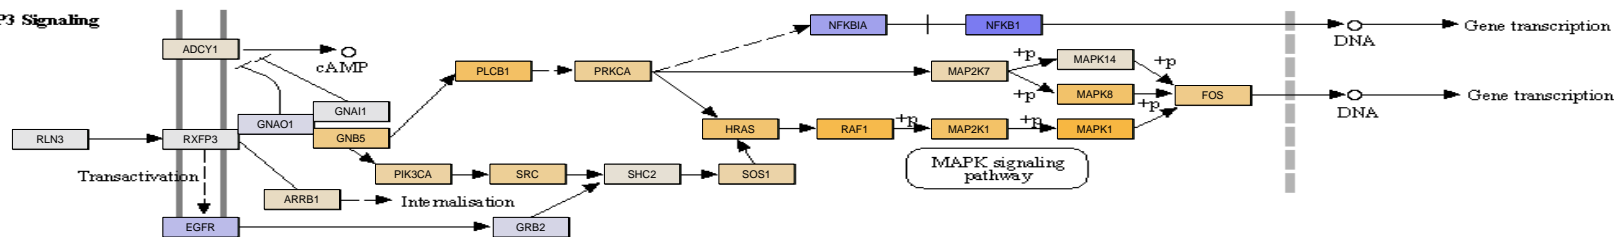

## RXFP4 Signaling

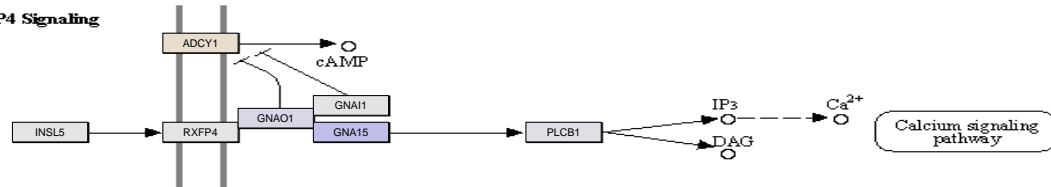

(Digestive system)  
Appetite stimulation  
Colon motility activation

# Relaxin signaling pathway Infant

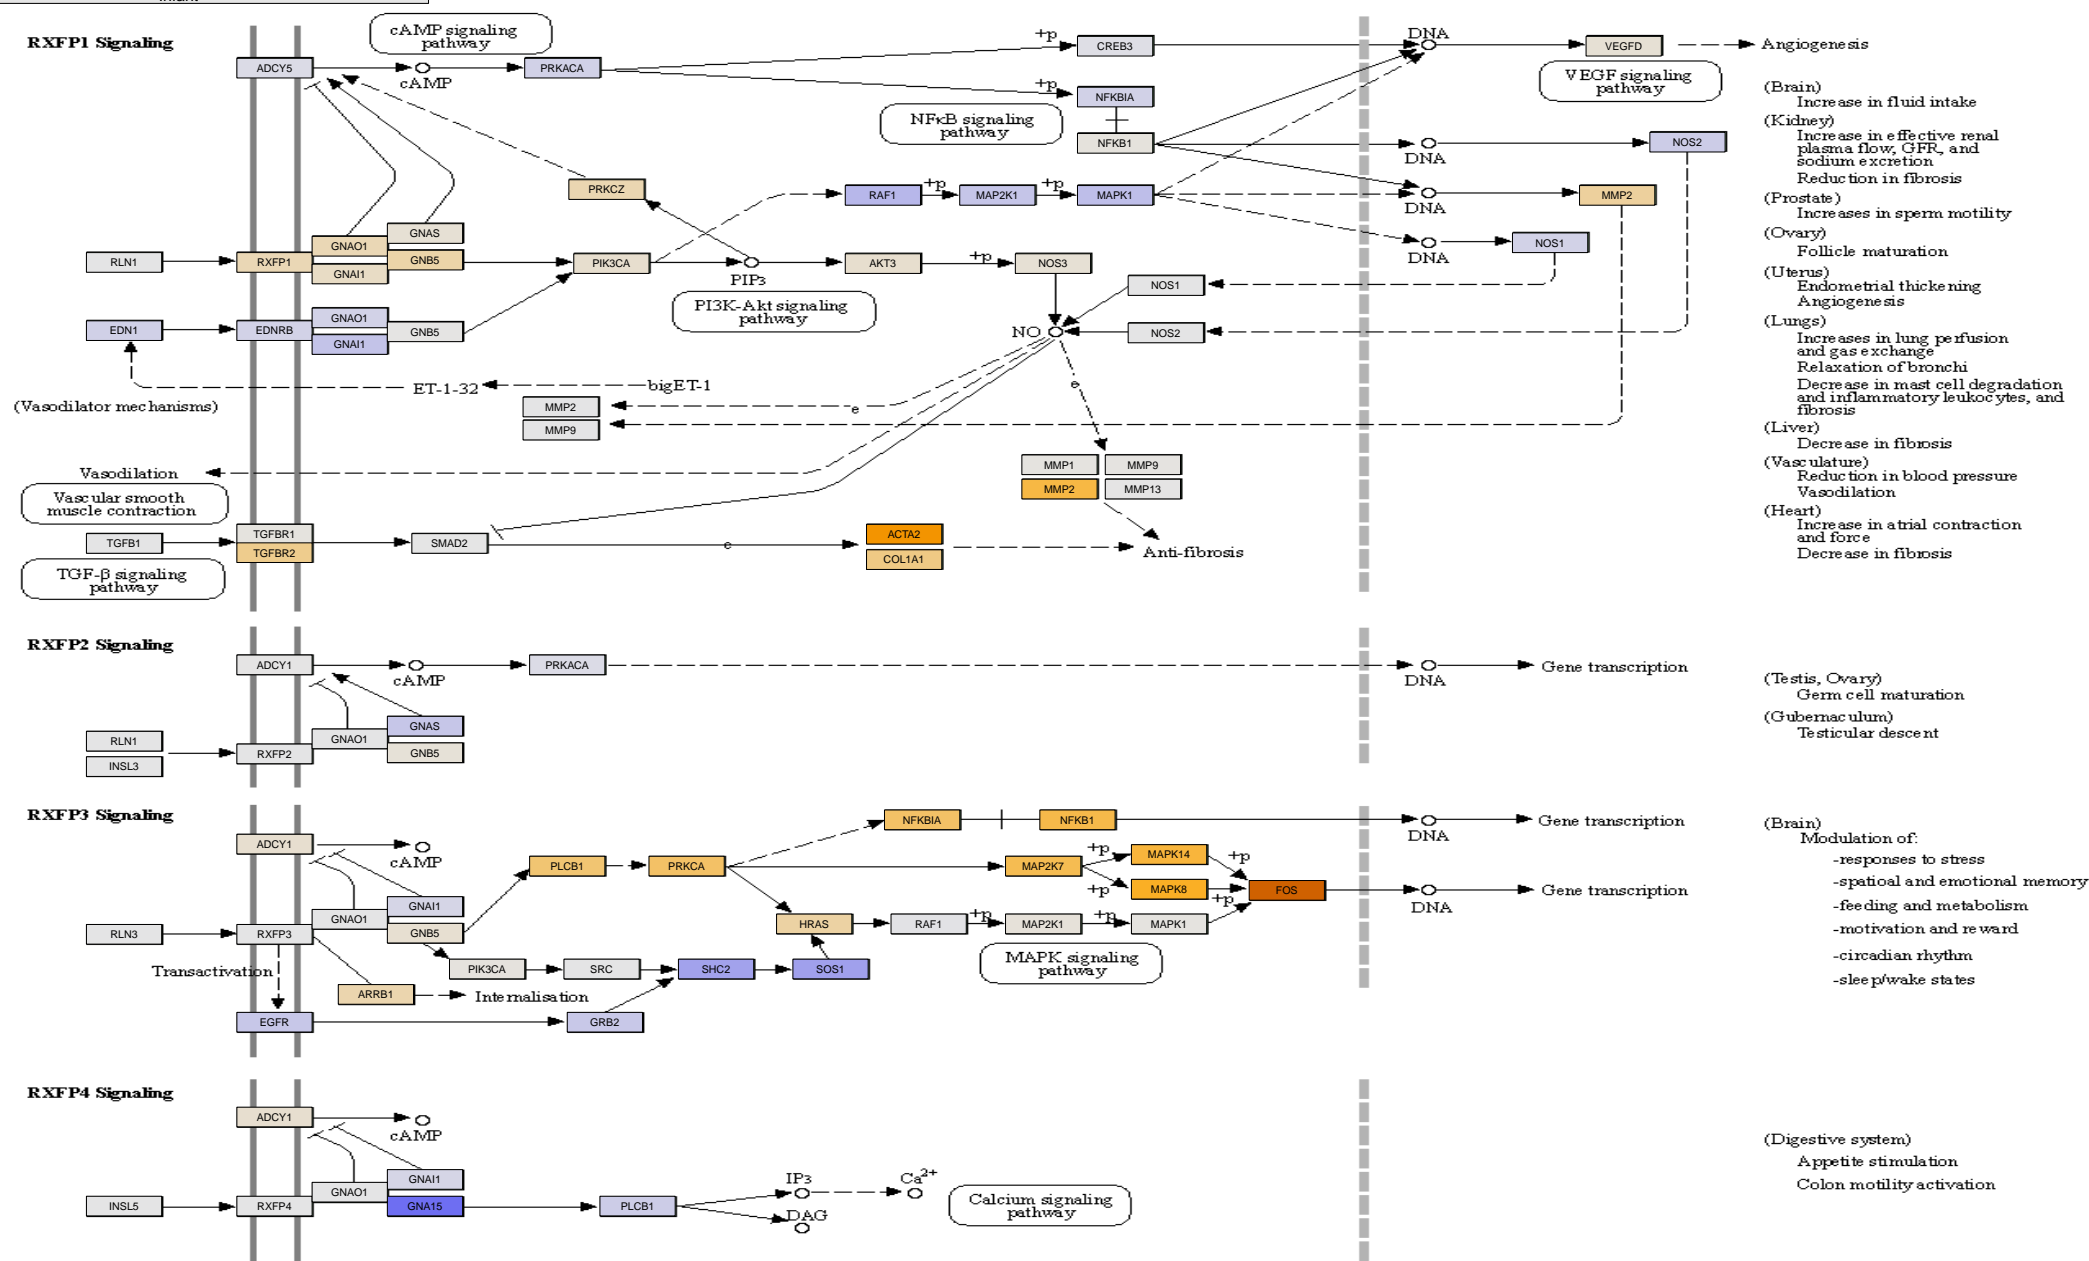

# Relaxin signaling pathway Teenager

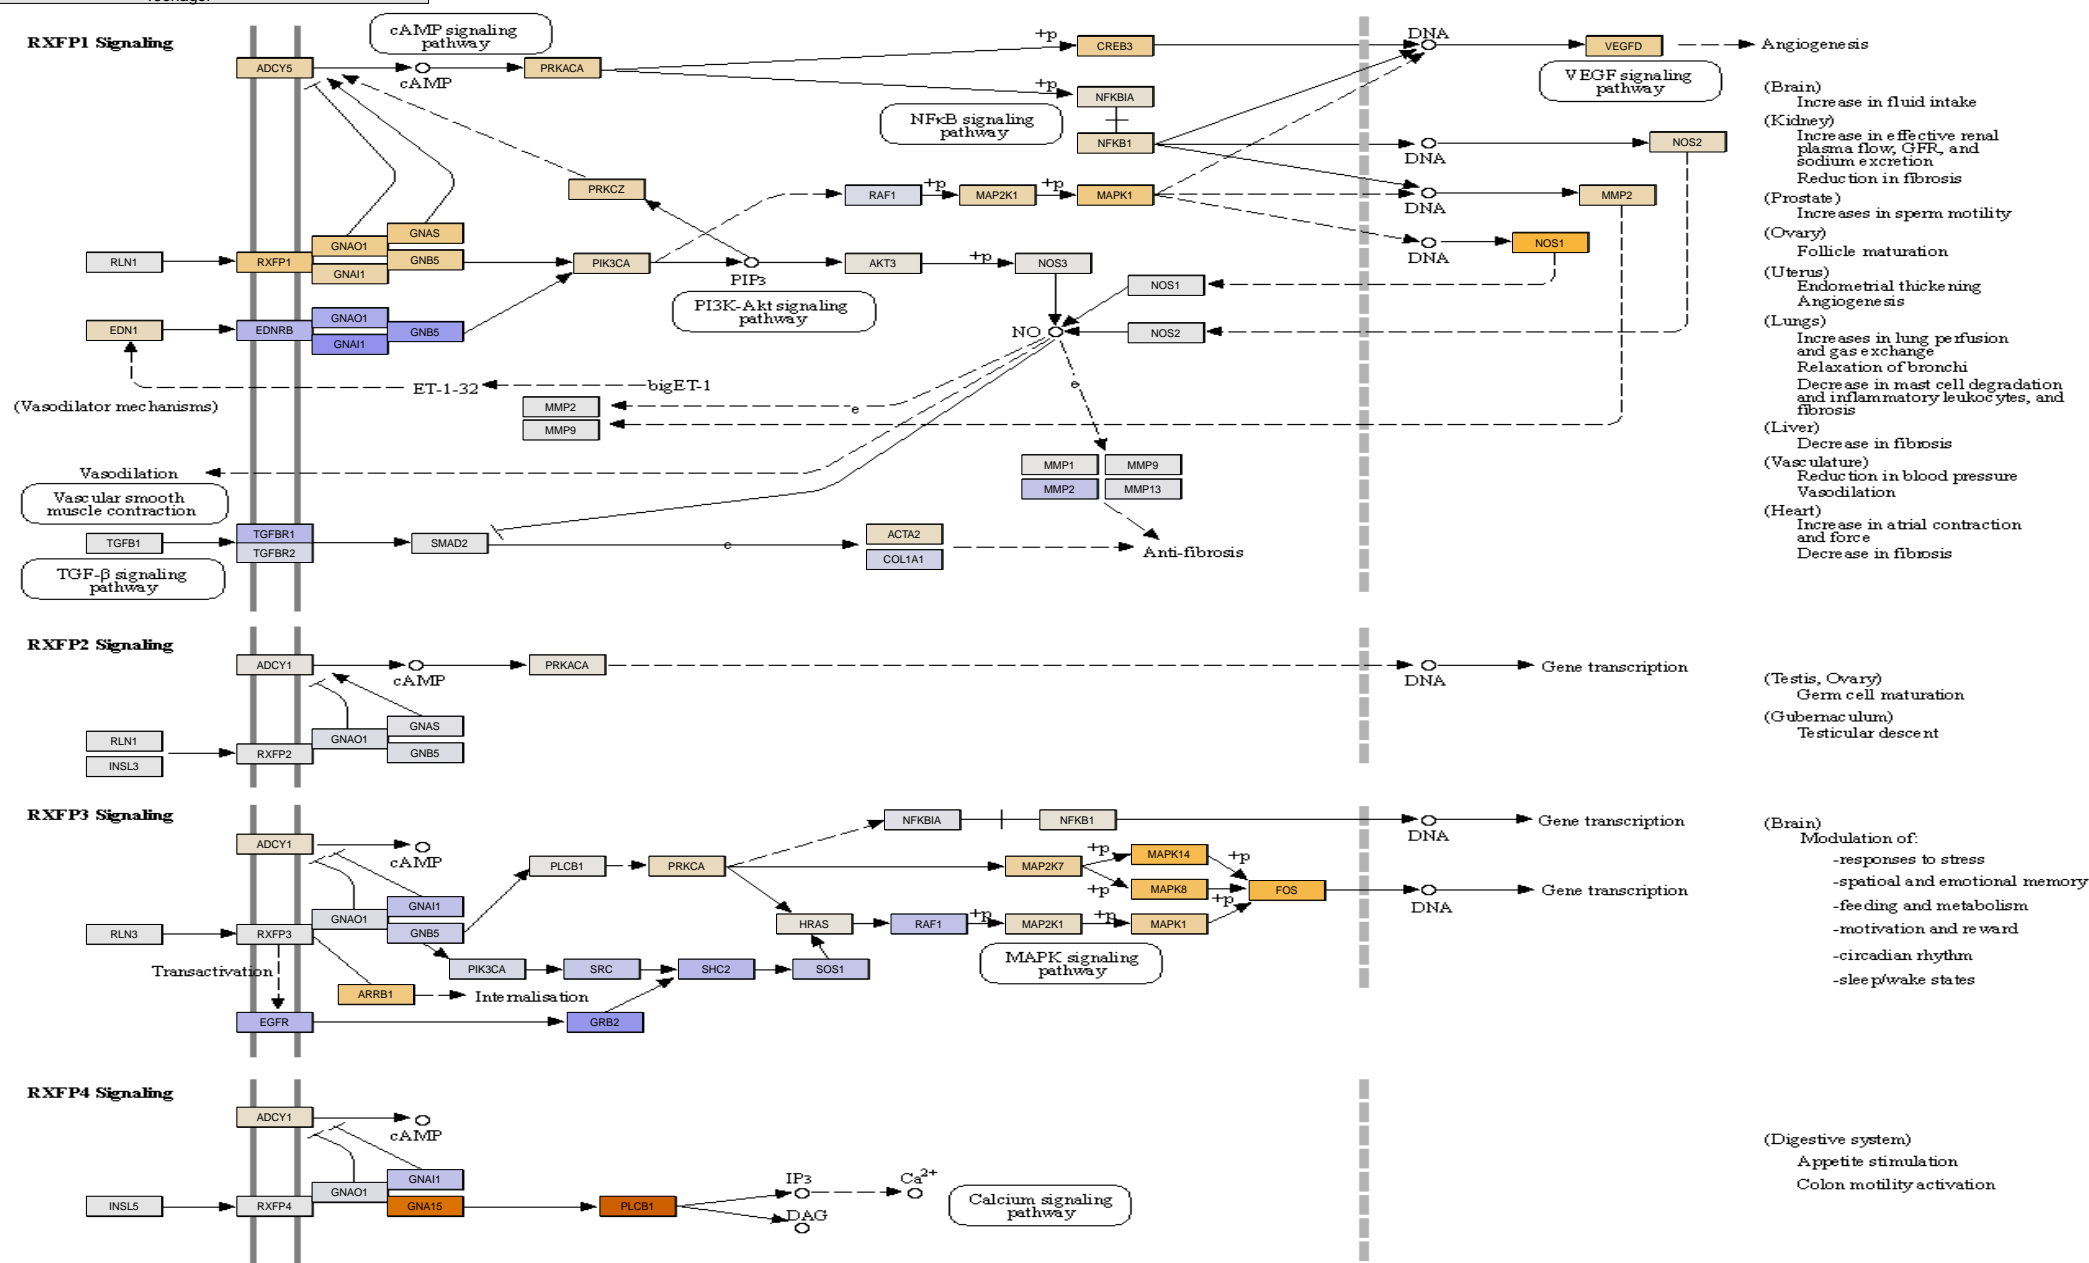





# Relaxin signaling pathway Late Adult

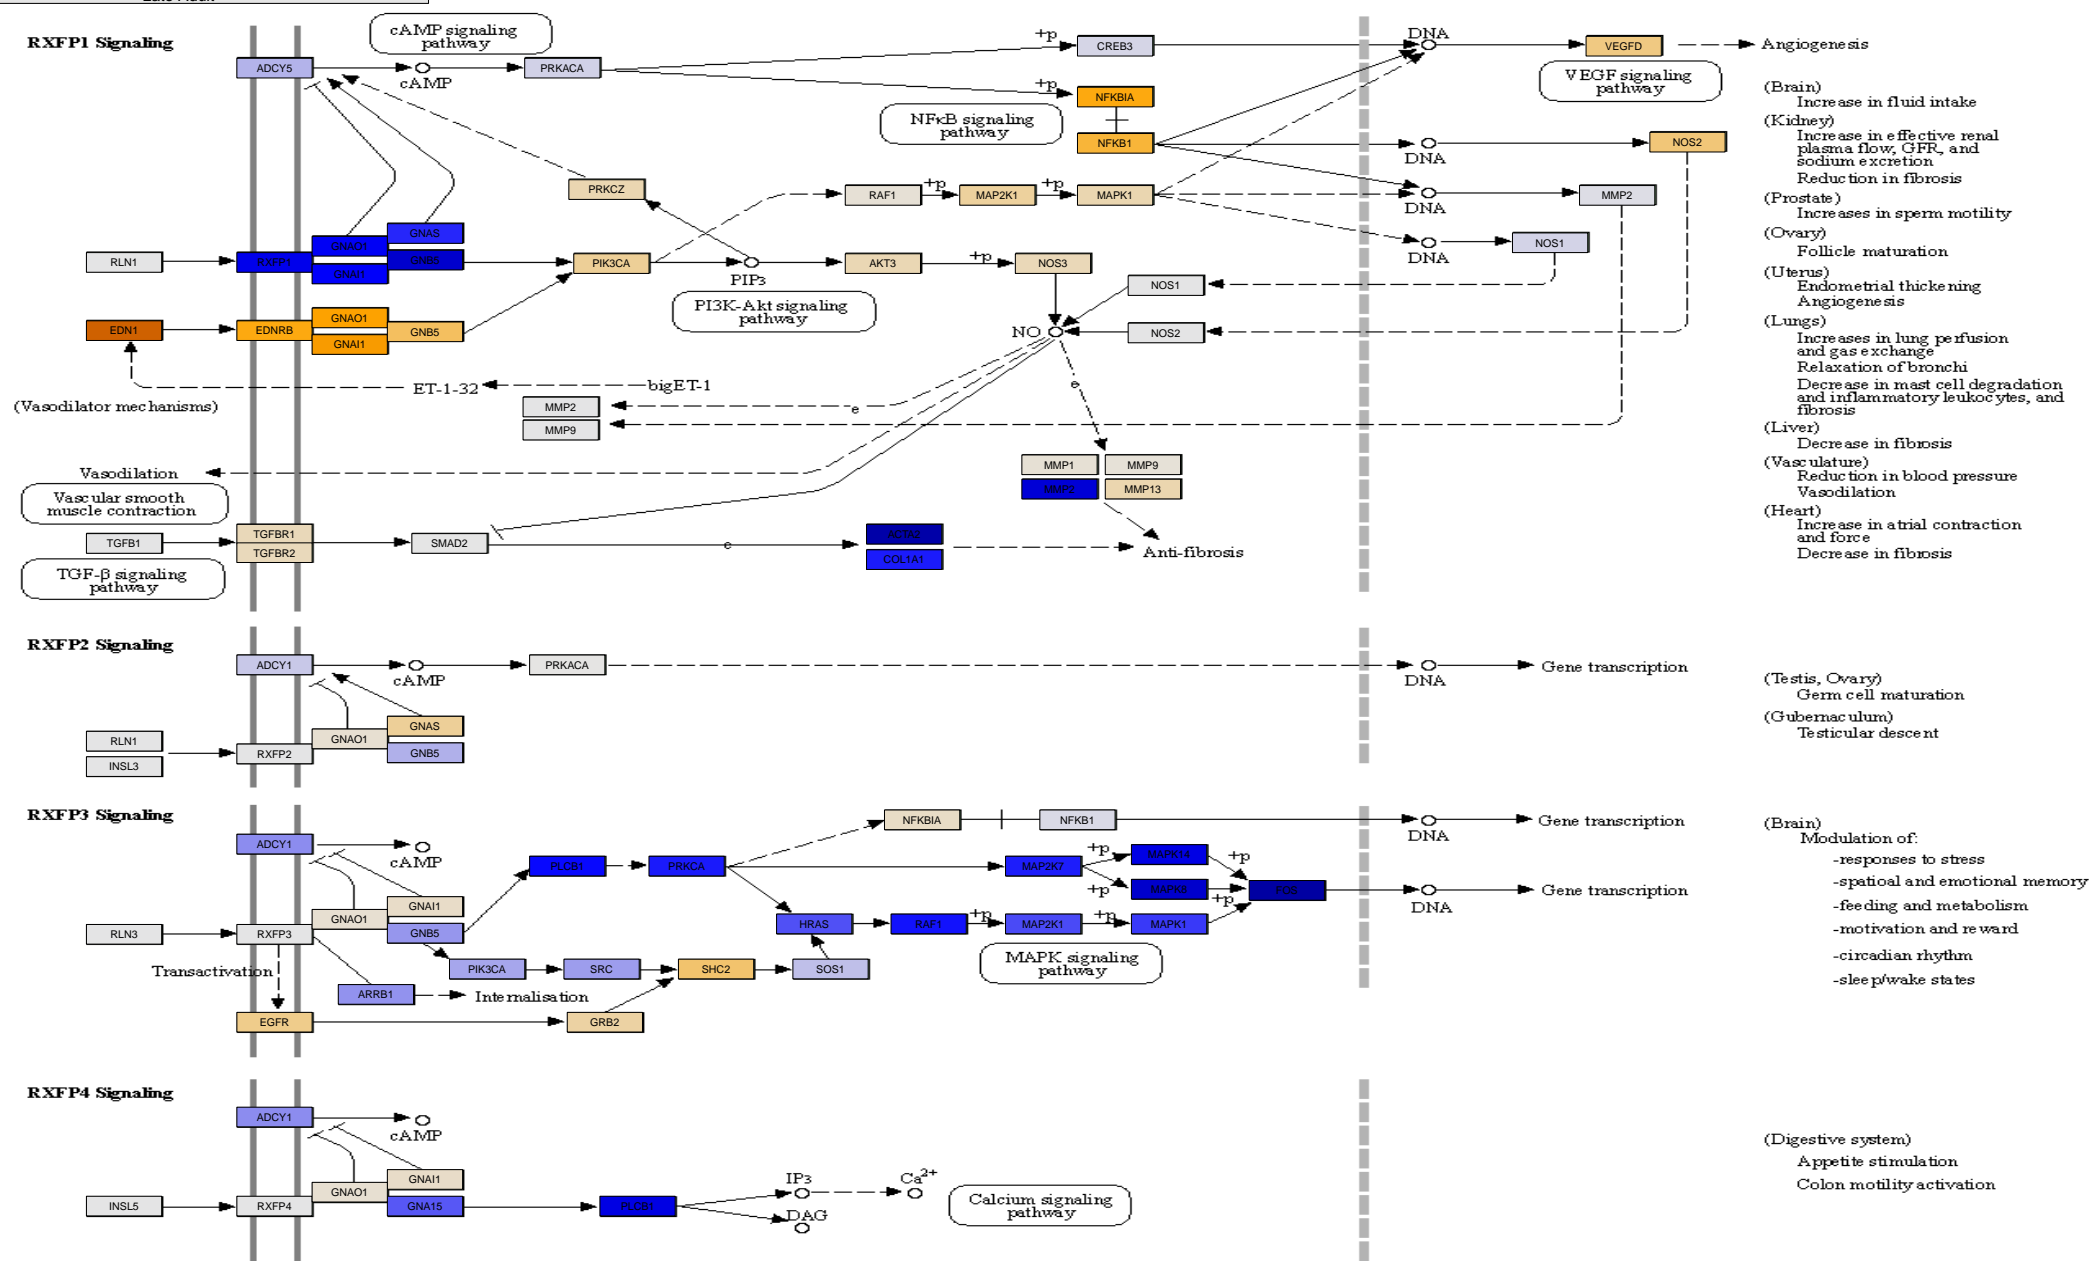

Supplement: s1 [file s1]
