# Supplementary material for: The Transcriptome and Methylome of the Developing and Aging Brain and Their Relations to Gliomas and Psychological Disorders
Source: MDPI journal article supplement (doi:10.3390/cells11030362), 2022-01-21

cGMP-PKG signaling pathway

all genes

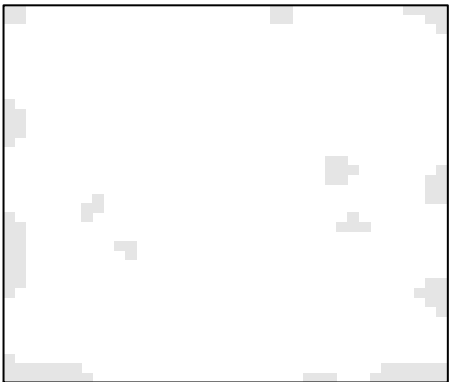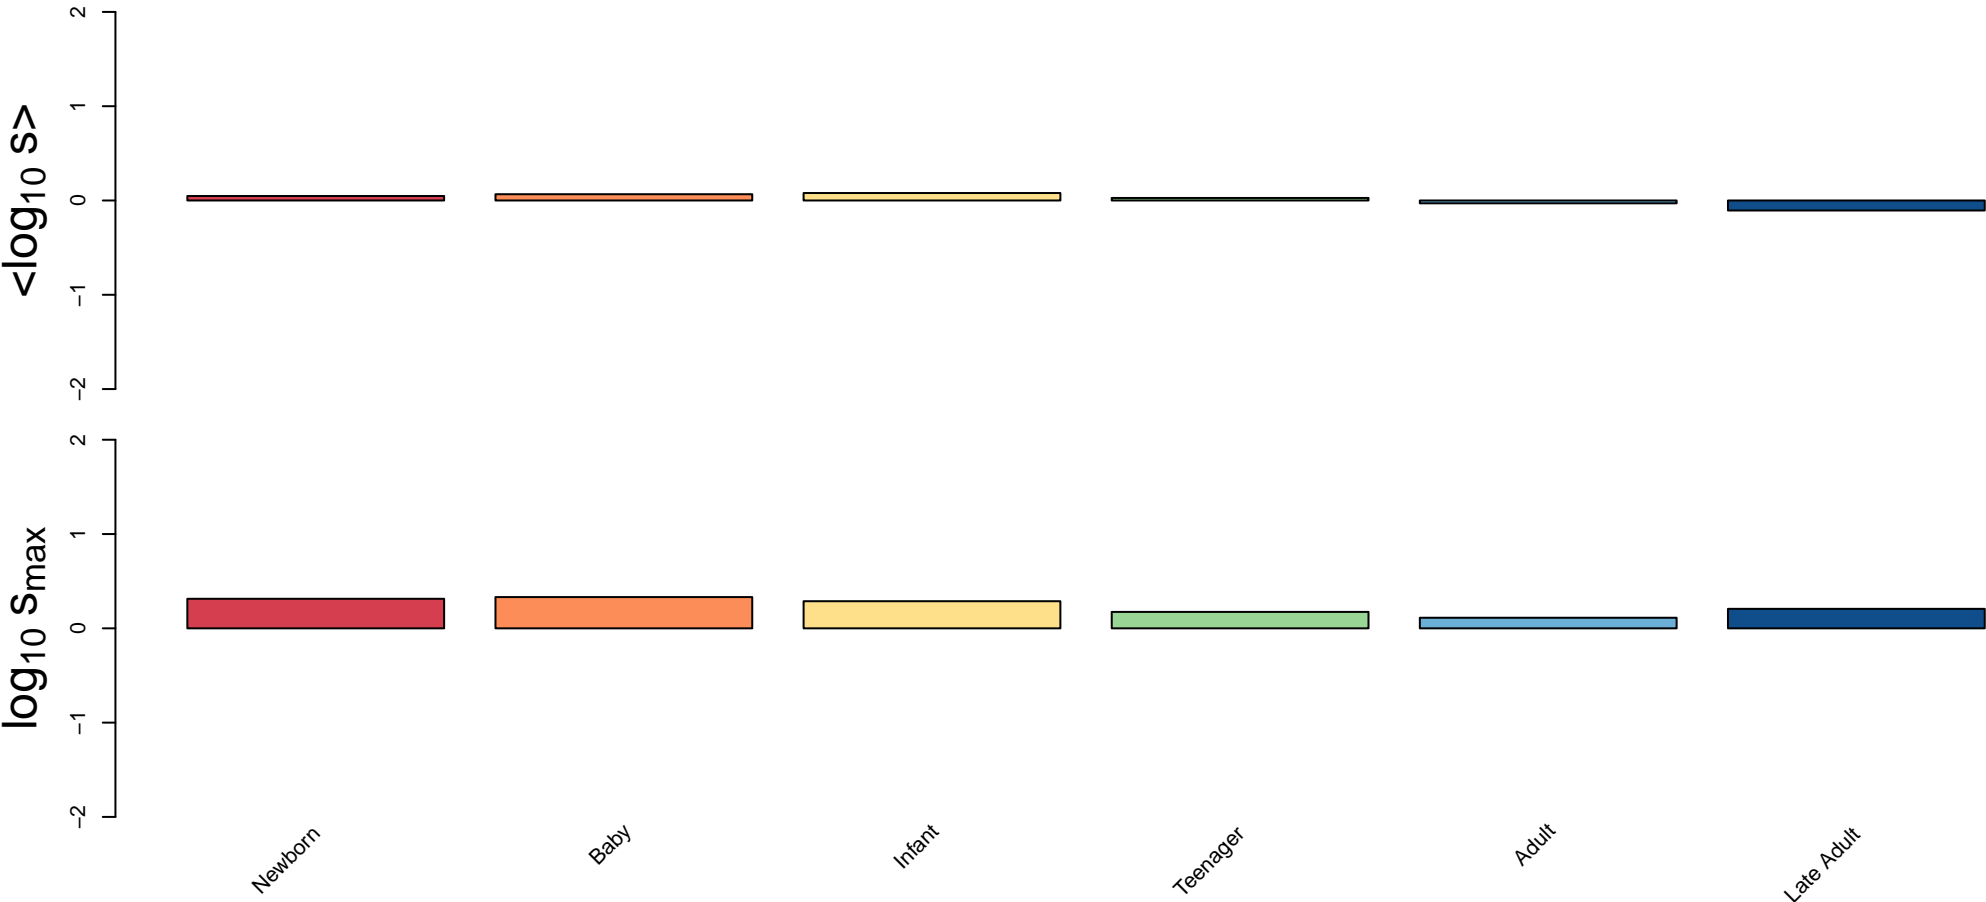

cGMP\_PKG\_signaling\_pathway  
genes with data

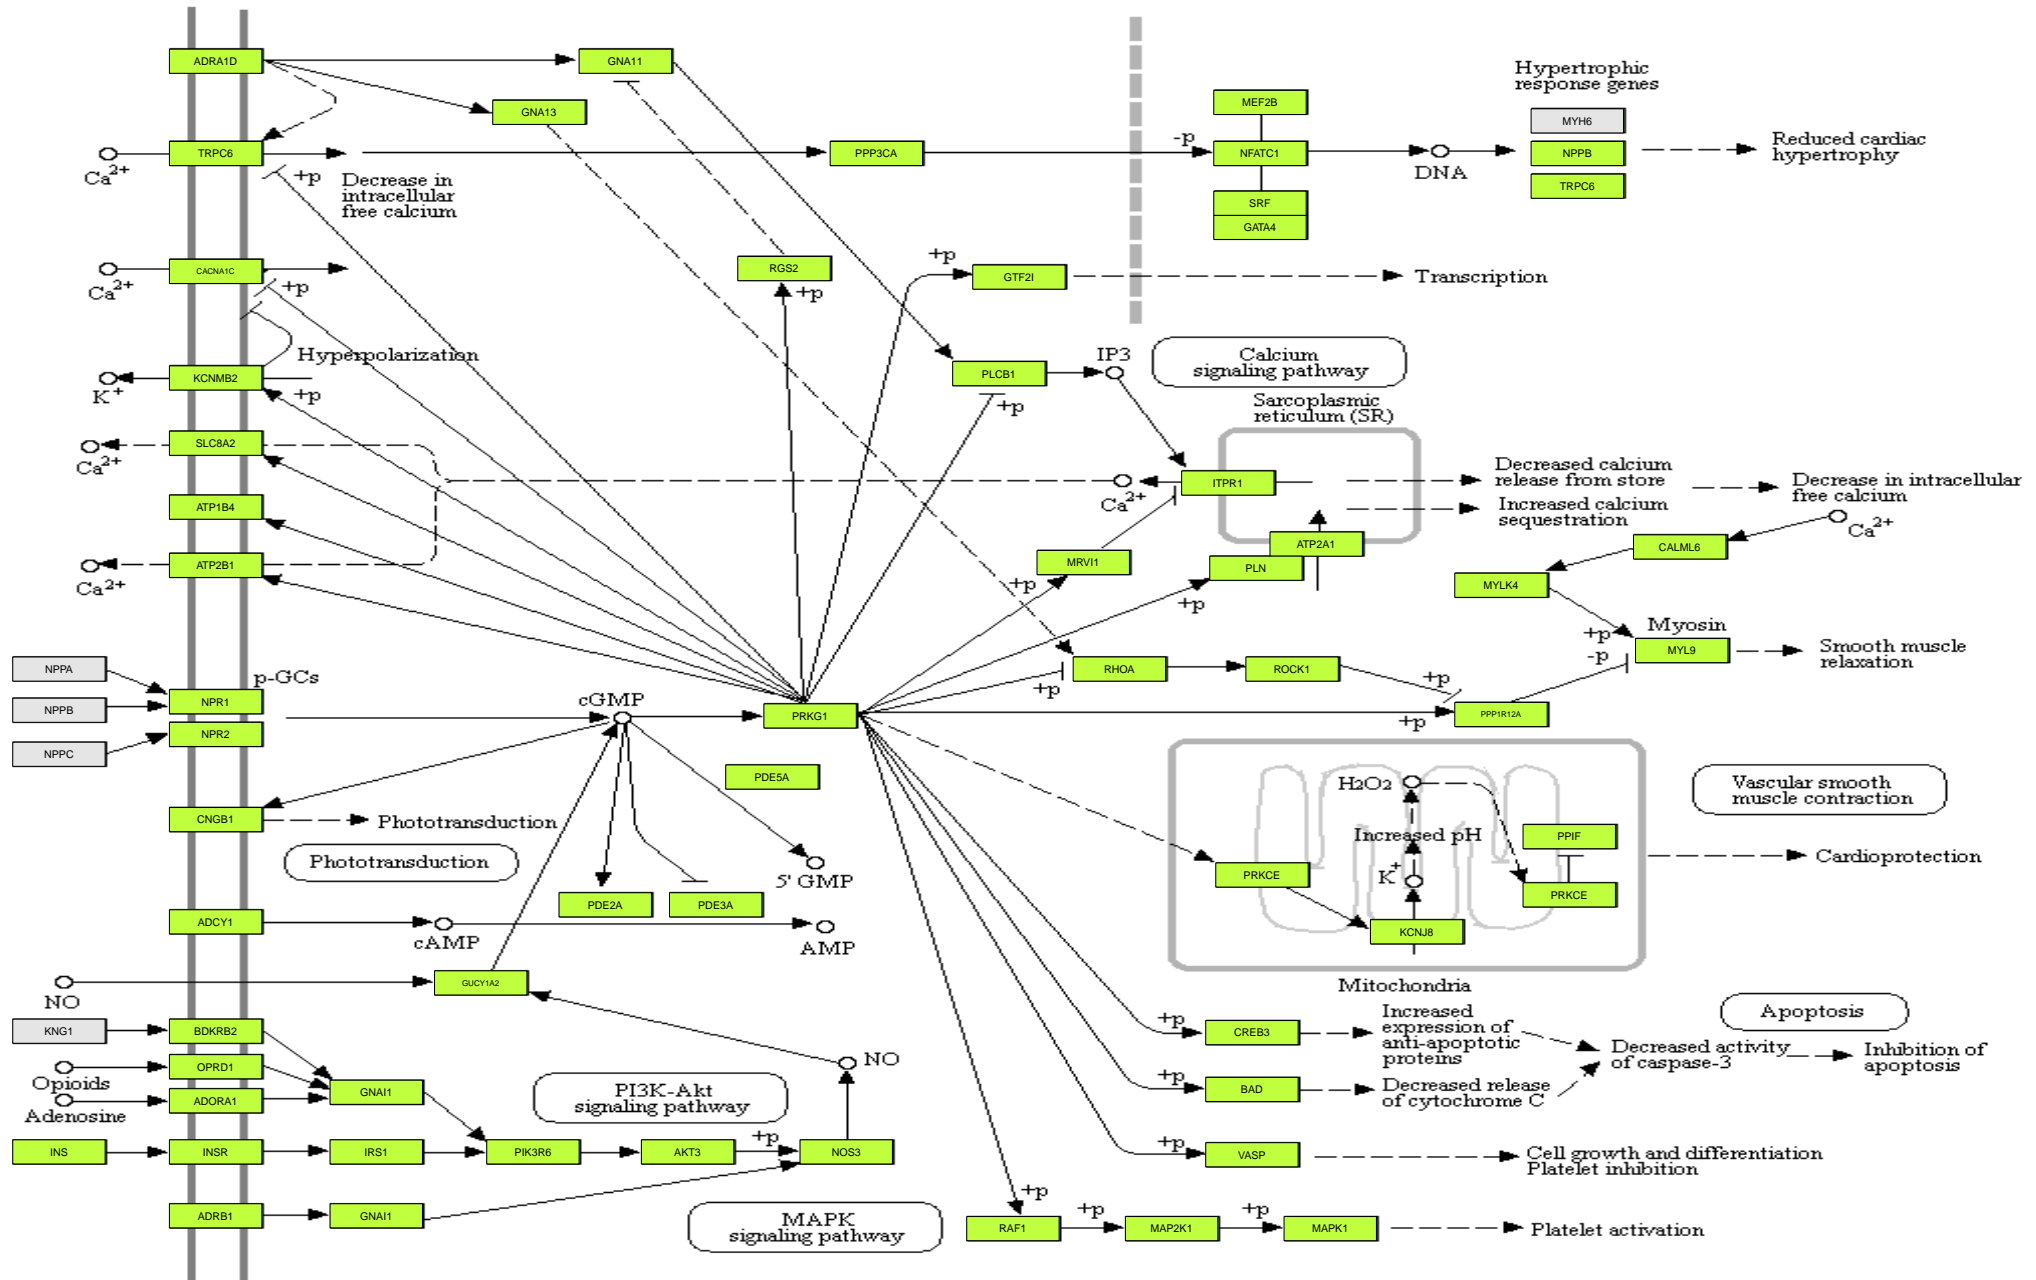

cGMP\_PKG\_signaling\_pathway  
sink nodes

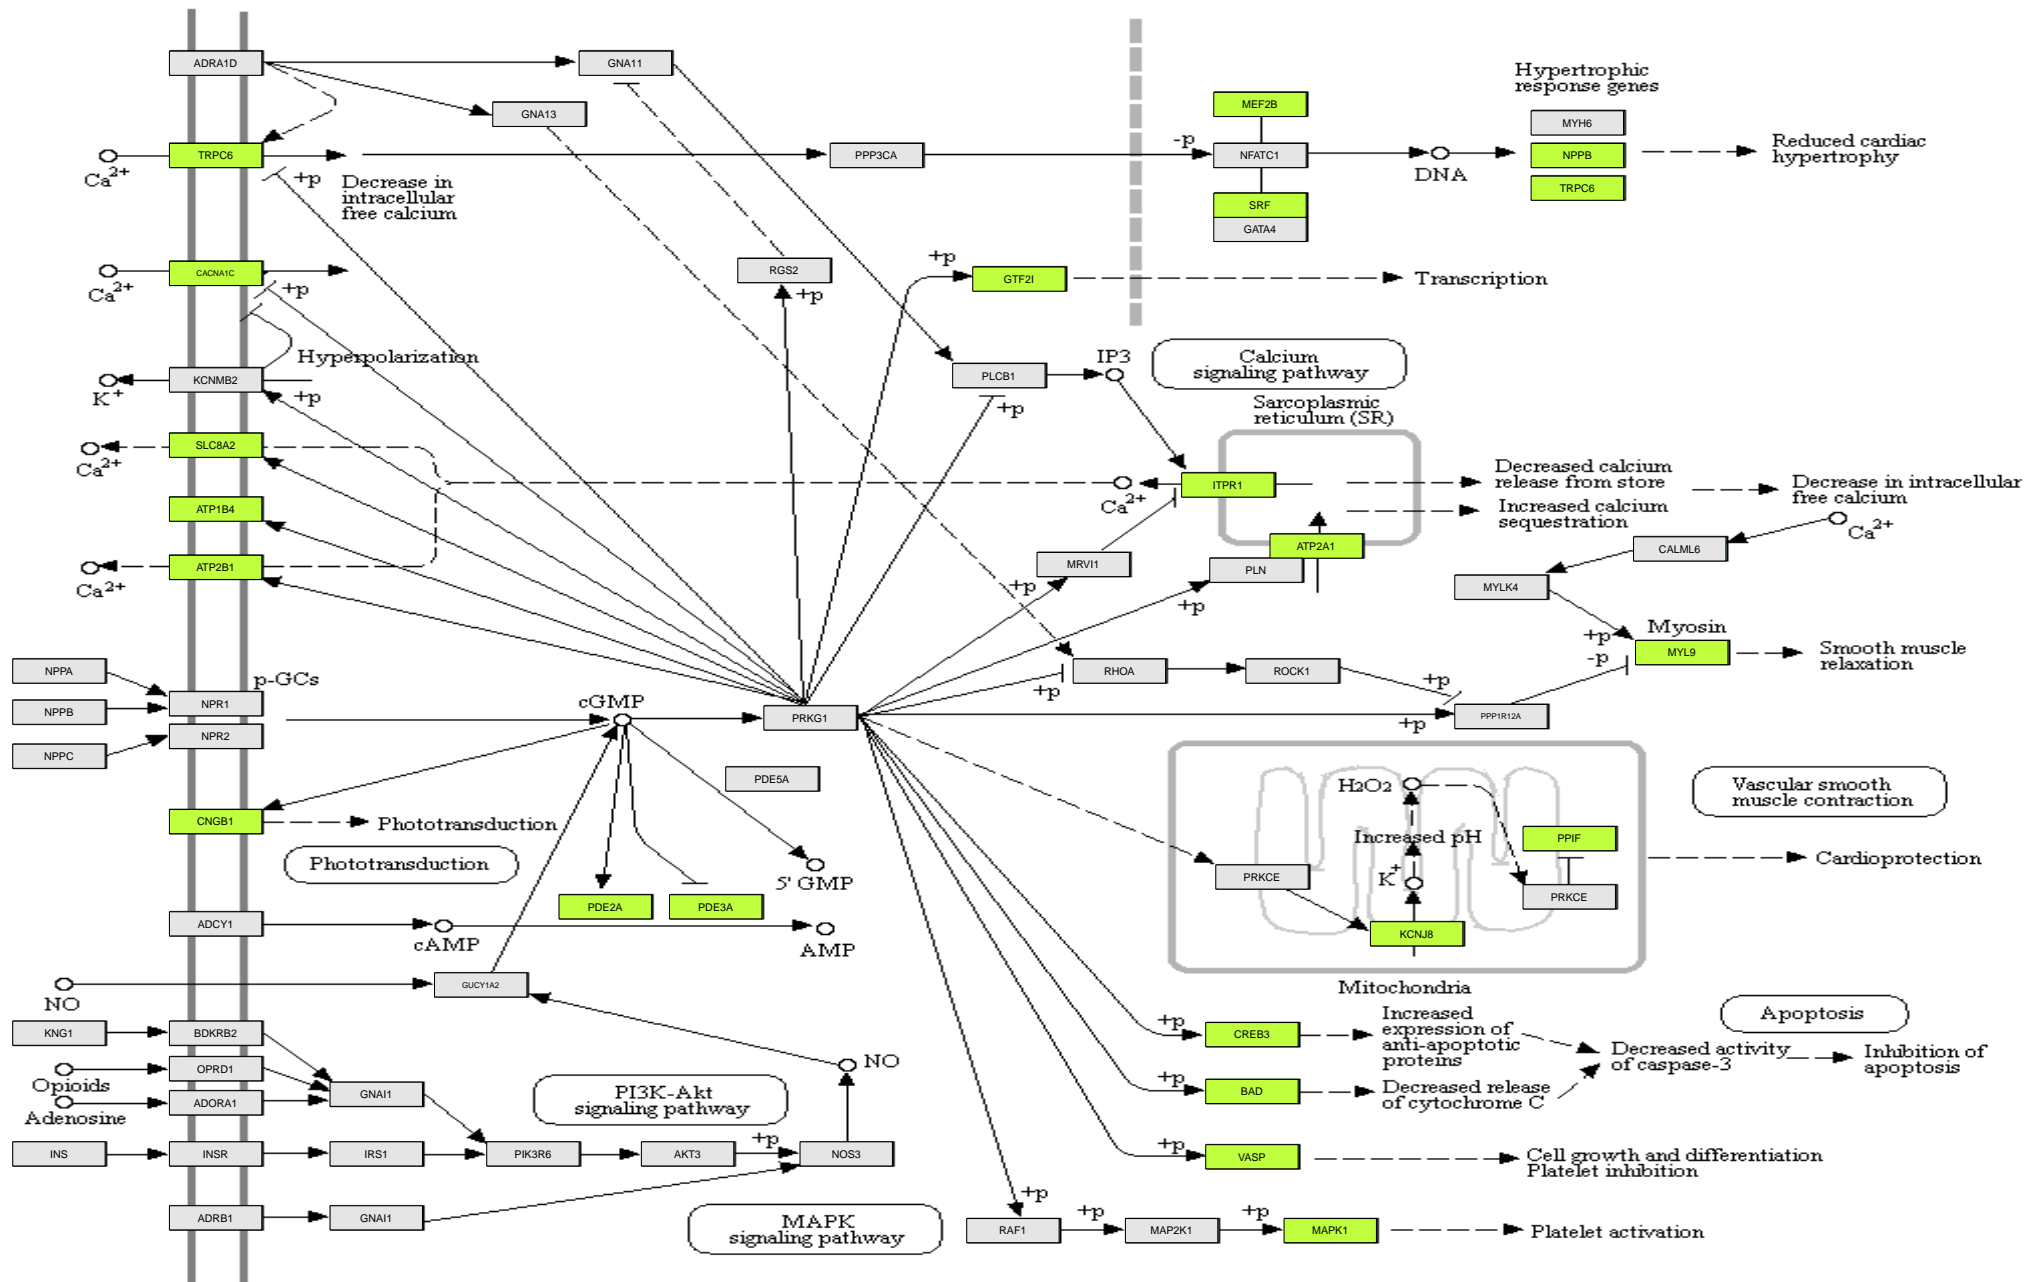

cGMP\_PKG\_signaling\_pathway  
Newborn

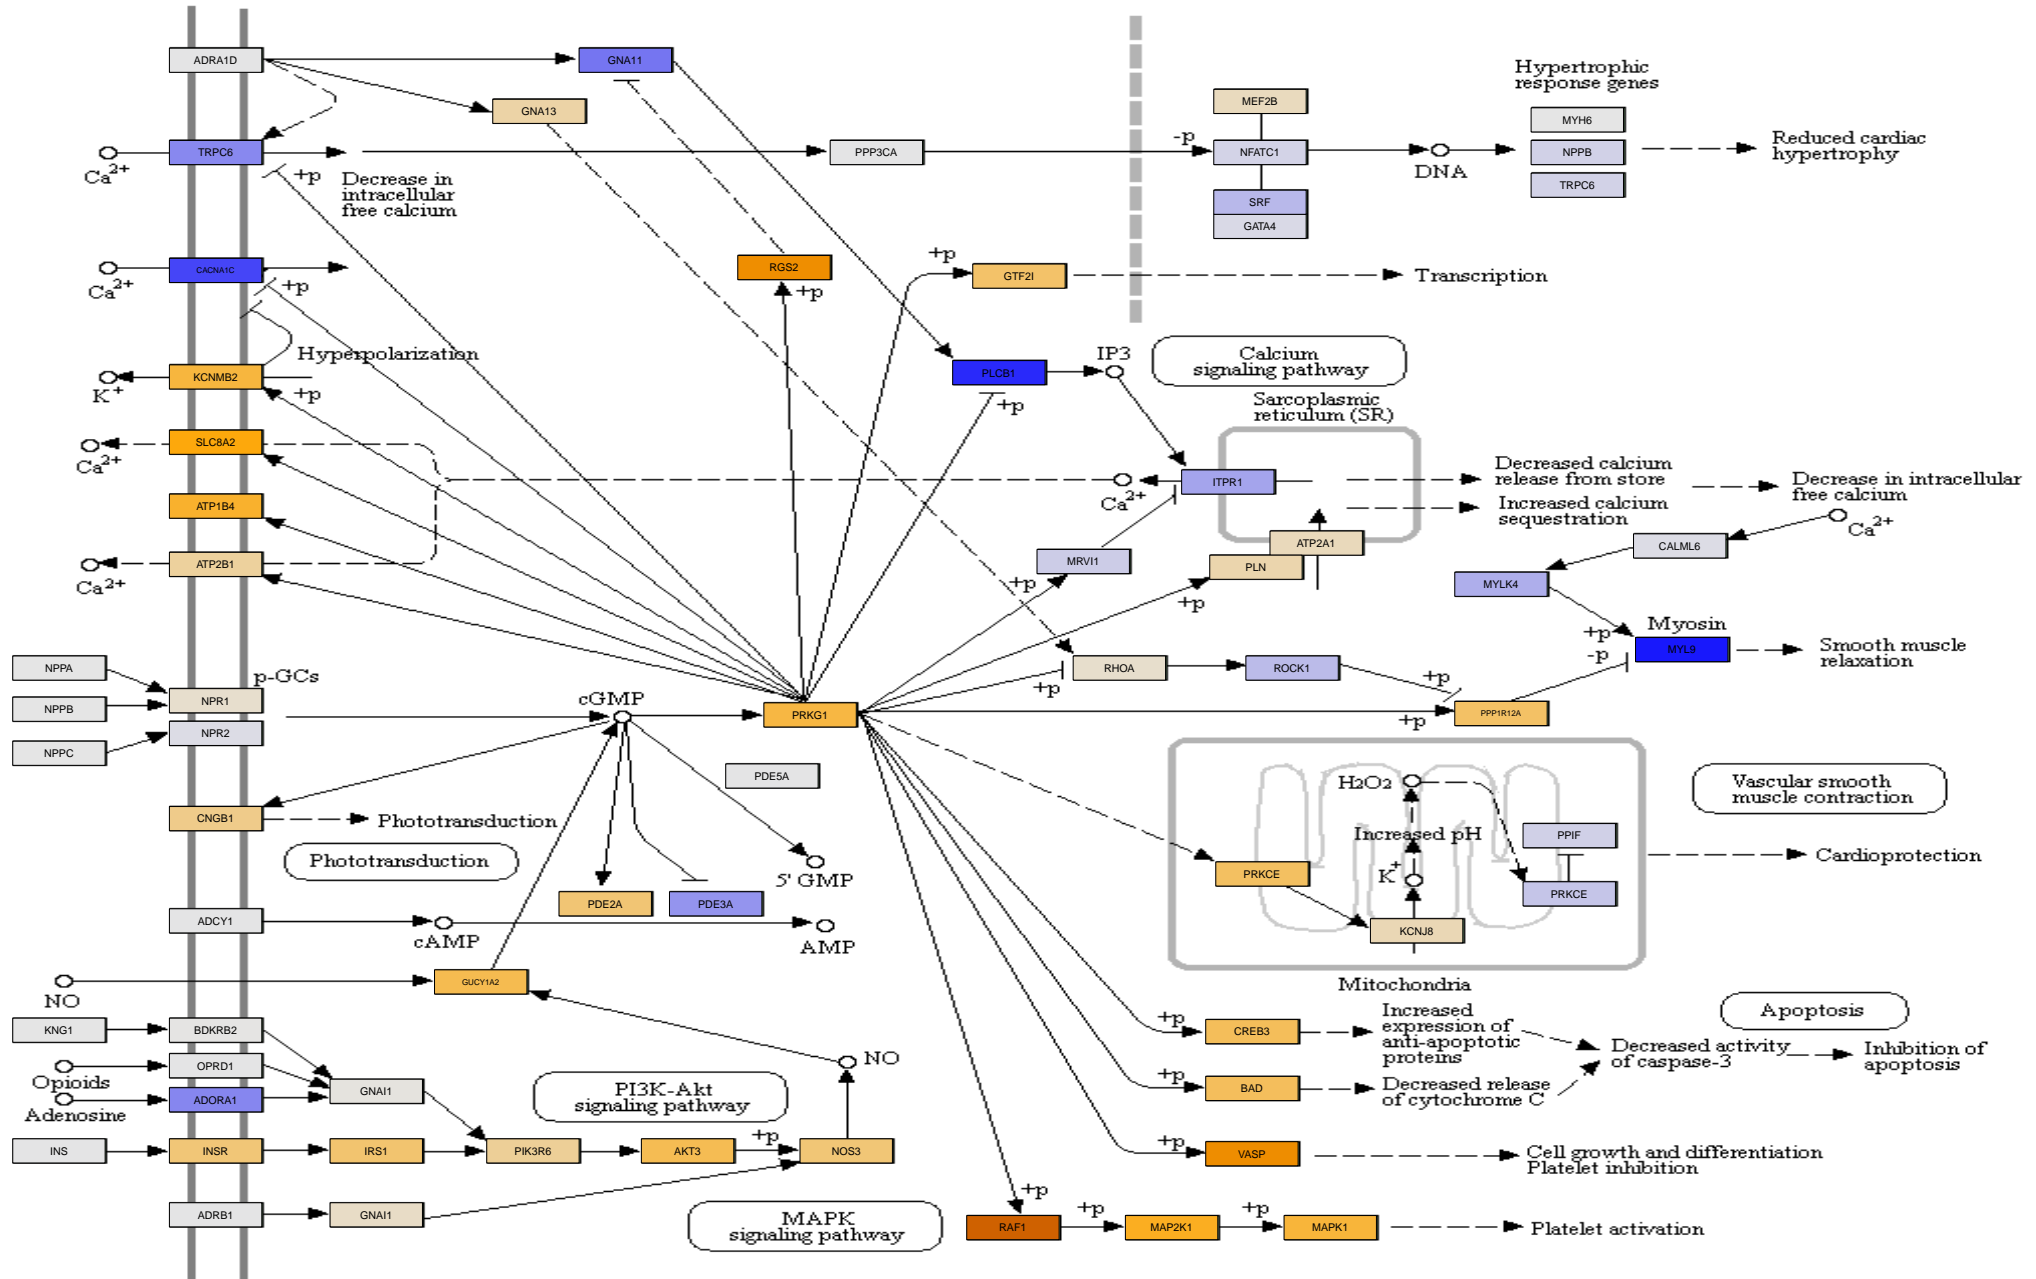

cGMP\_PKG\_signaling\_pathway  
Baby

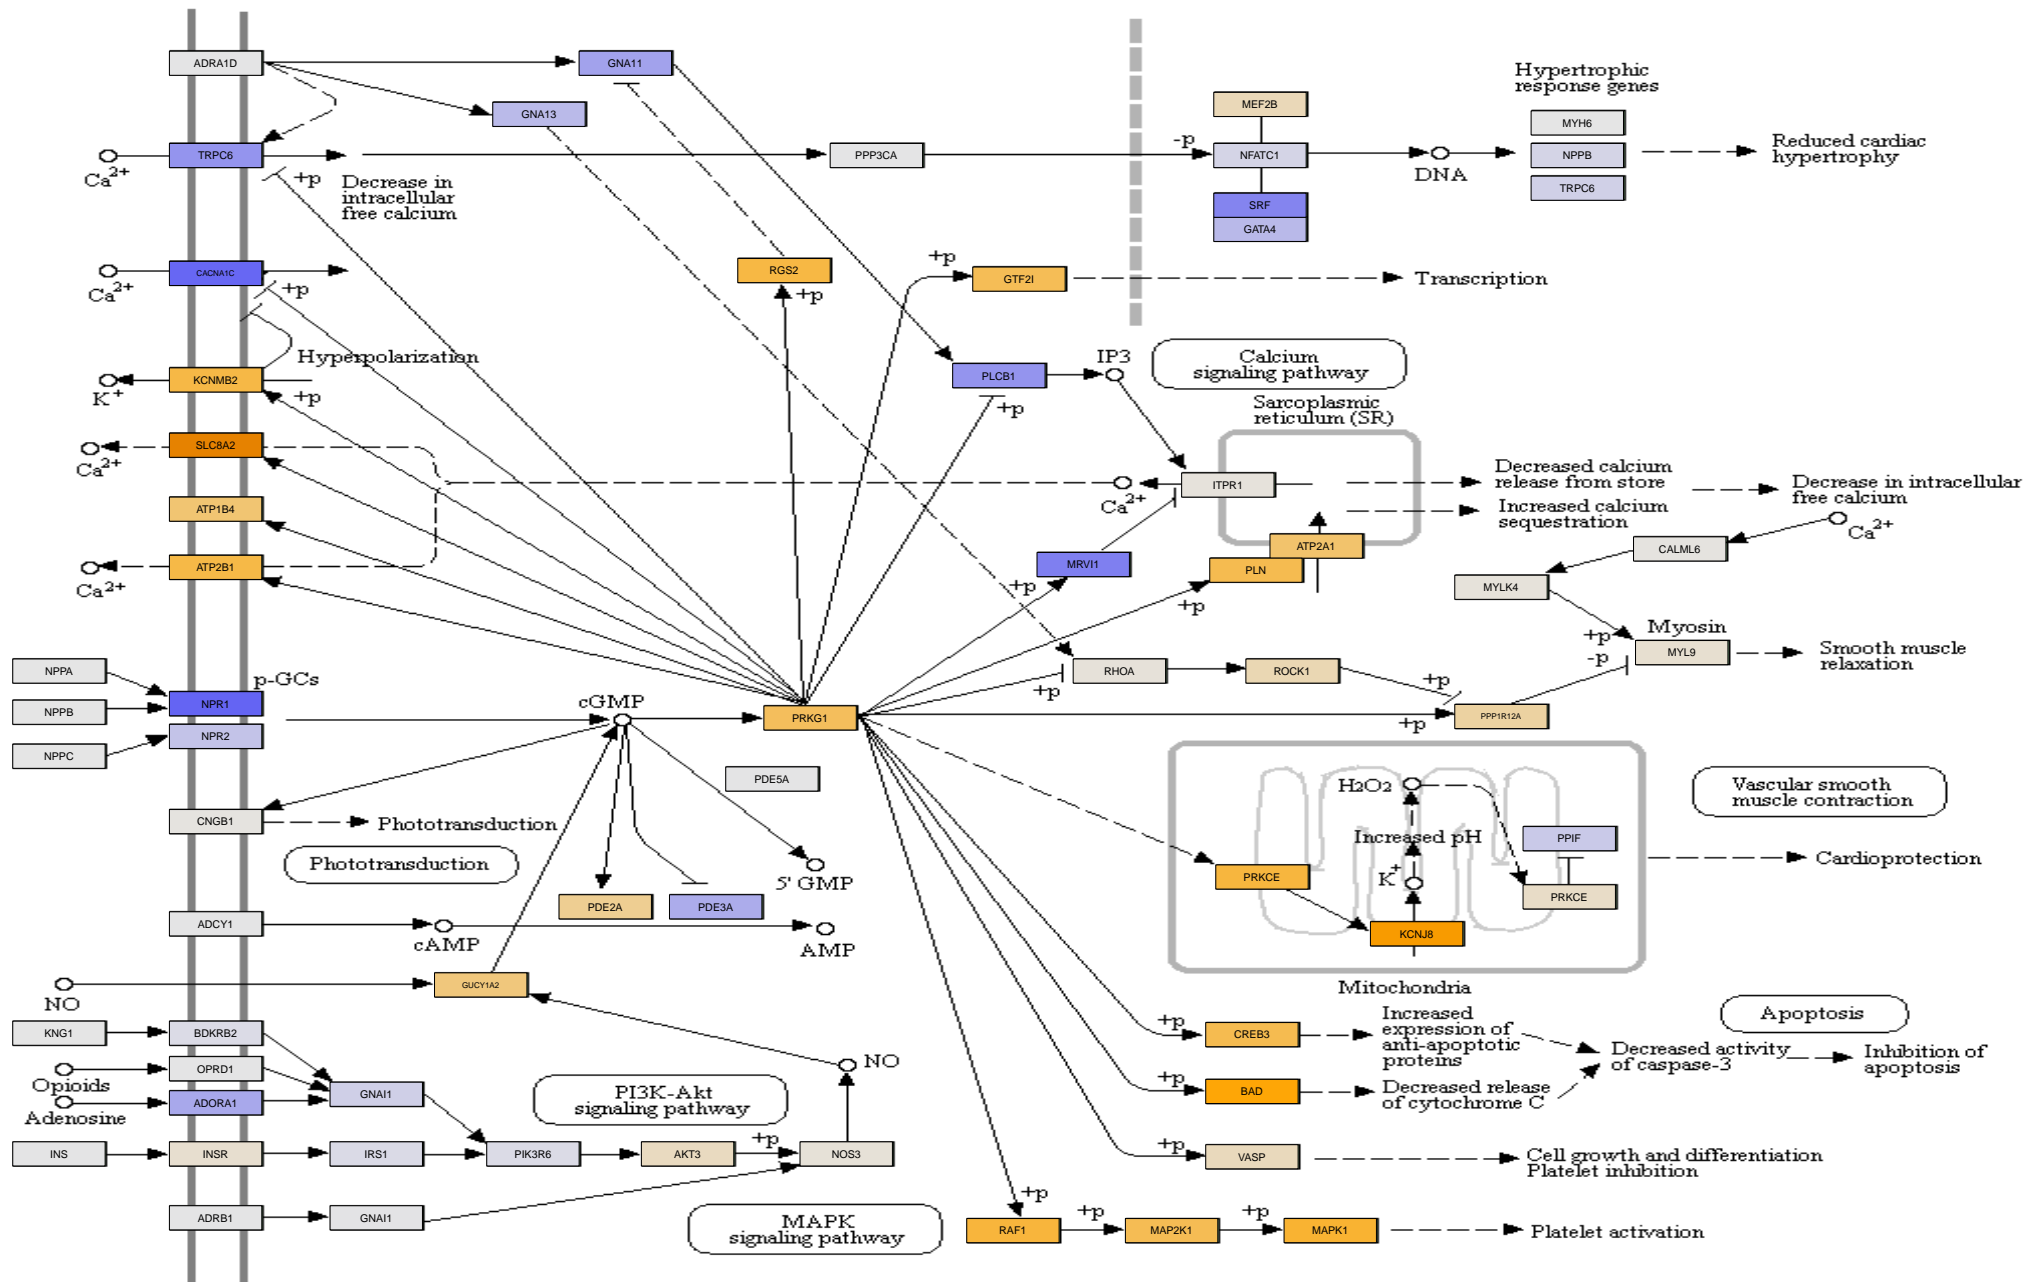

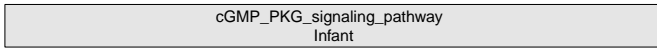

cGMP\_PKG\_signaling\_pathway  
Teenager

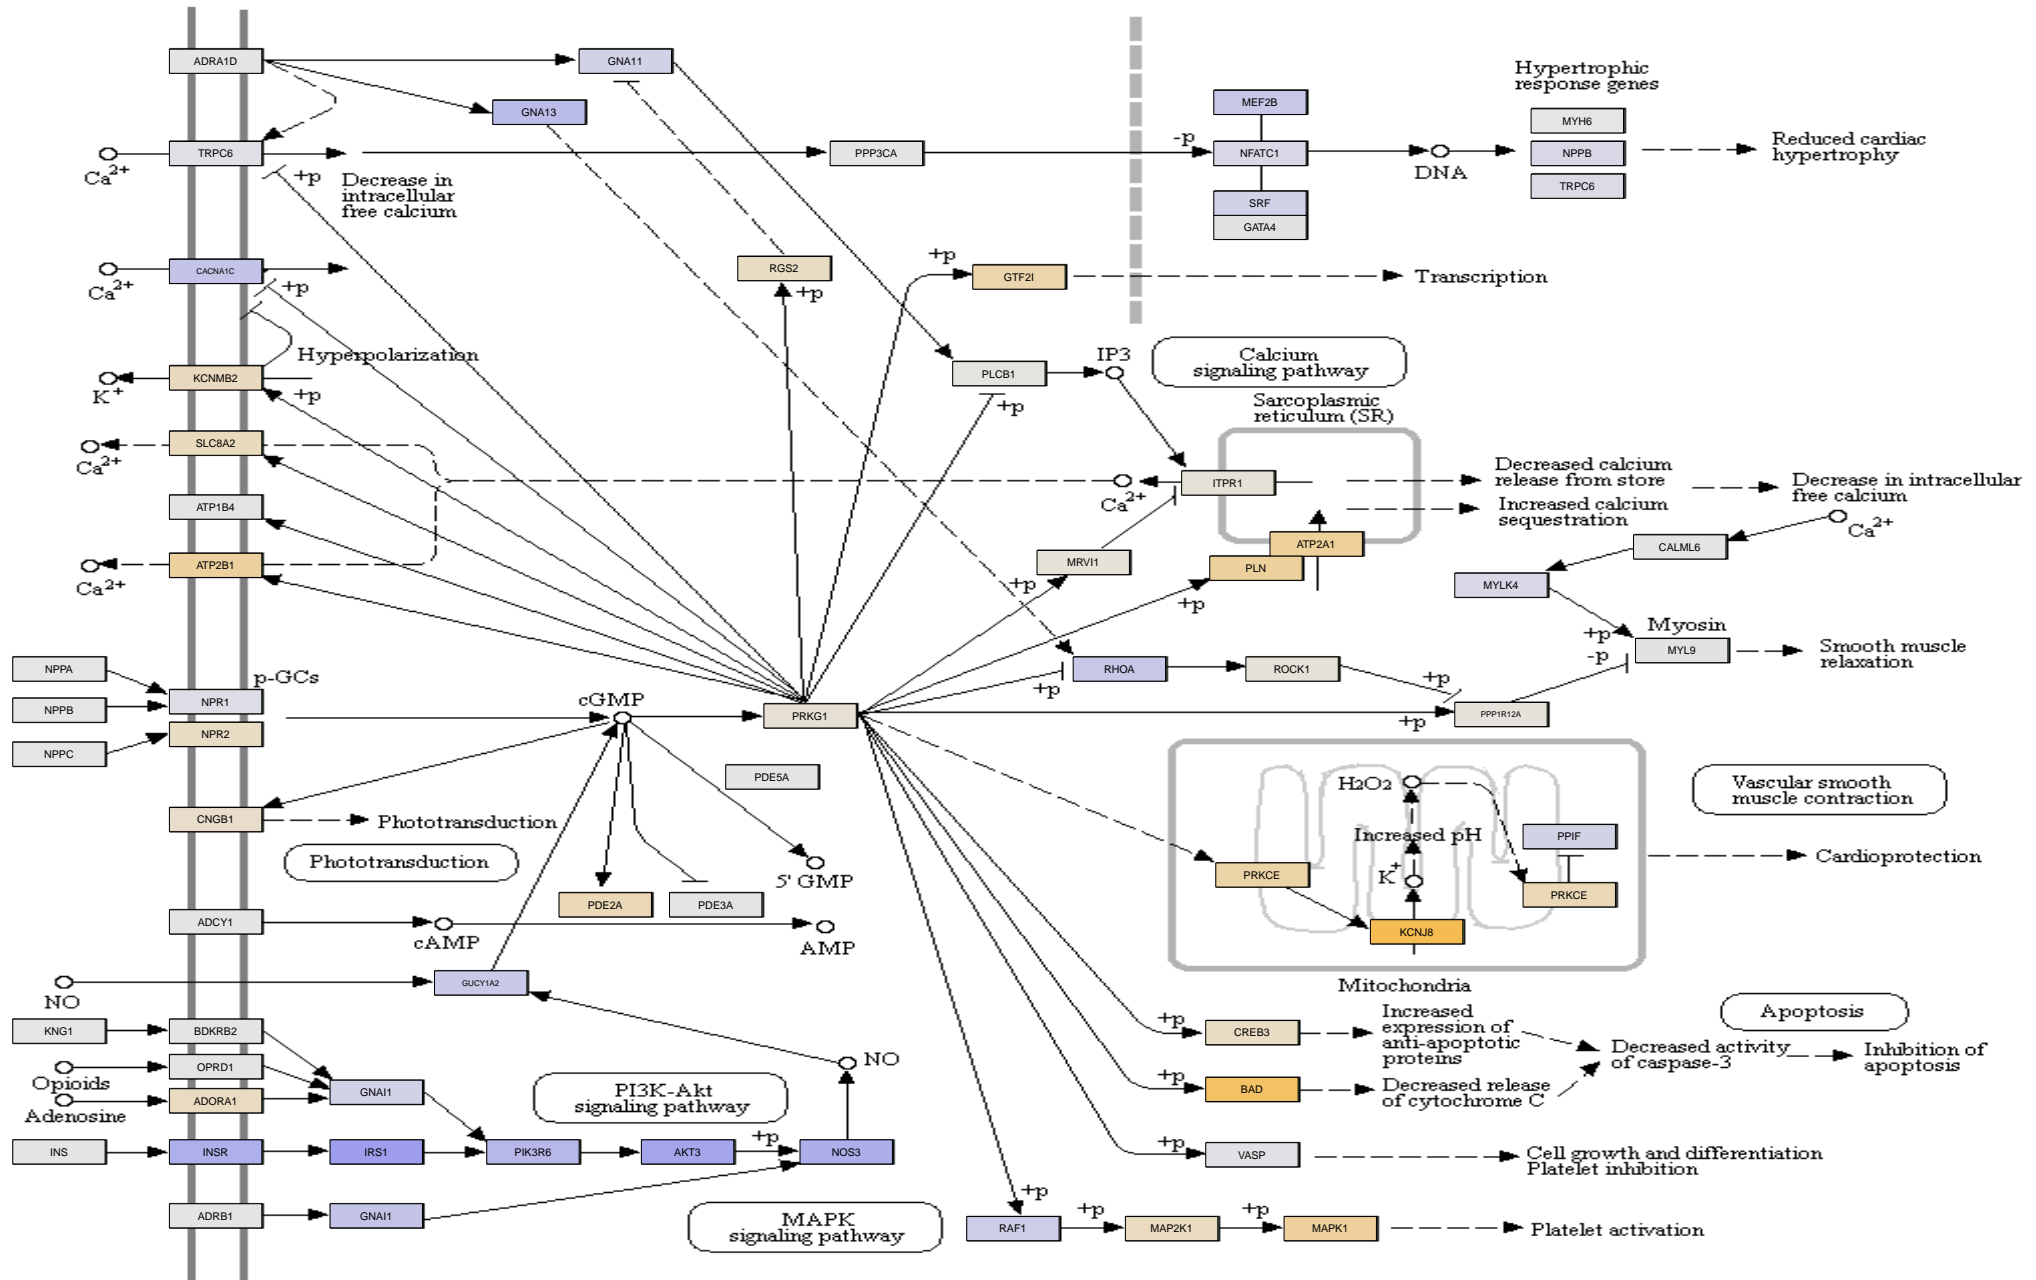

cGMP\_PKG\_signaling\_pathway  
Adult

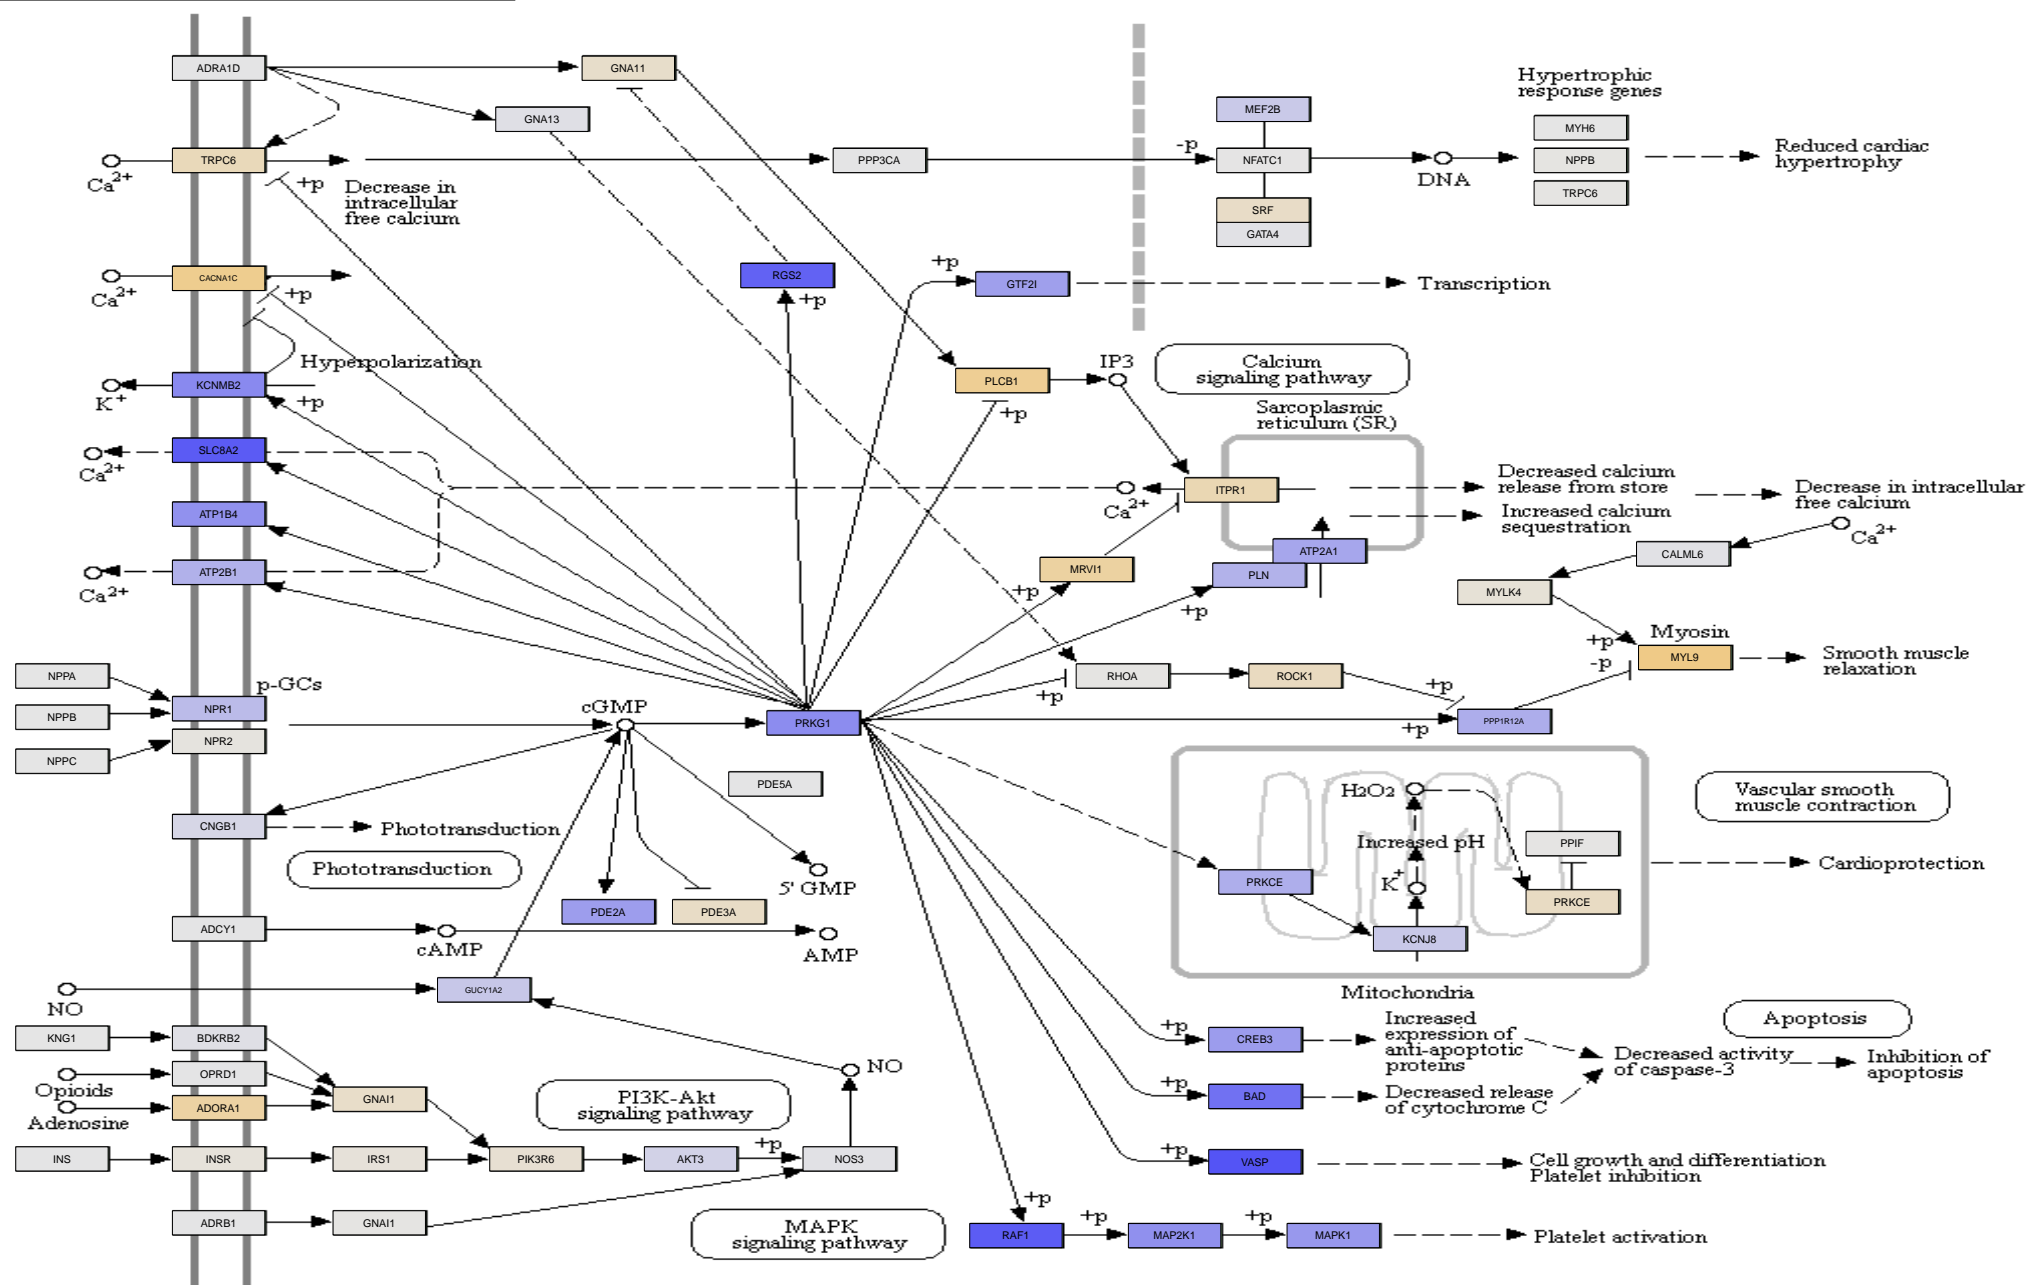



cGMP\_PKG\_signaling\_pathway  
Late Adult

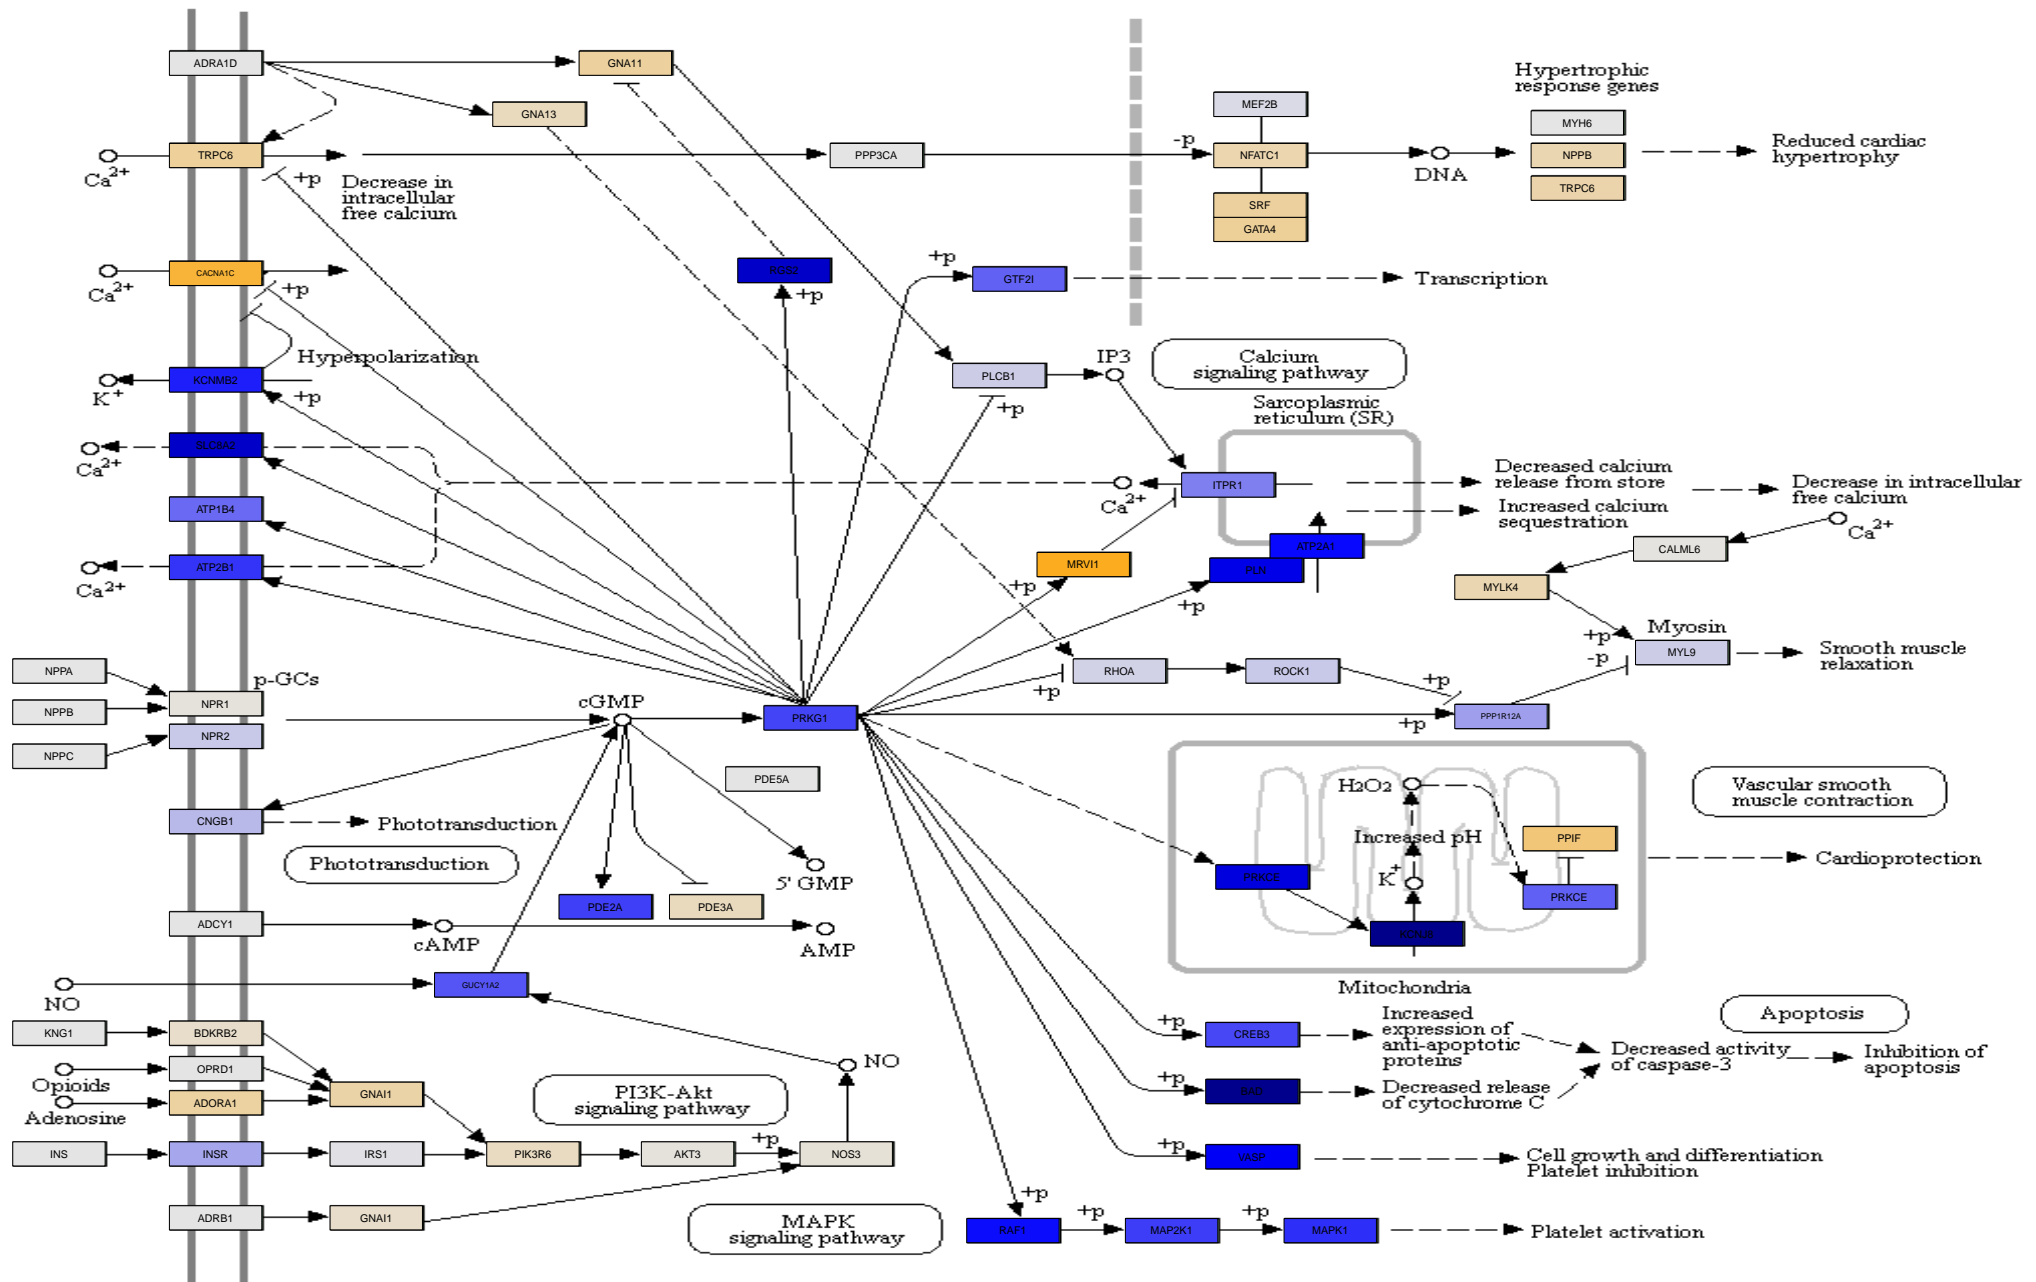

Supplement: s1 [file s1]
