# Supplementary material for: The Transcriptome and Methylome of the Developing and Aging Brain and Their Relations to Gliomas and Psychological Disorders
Source: MDPI journal article supplement (doi:10.3390/cells11030362), 2022-01-21

TGF-beta signaling pathway

all genes

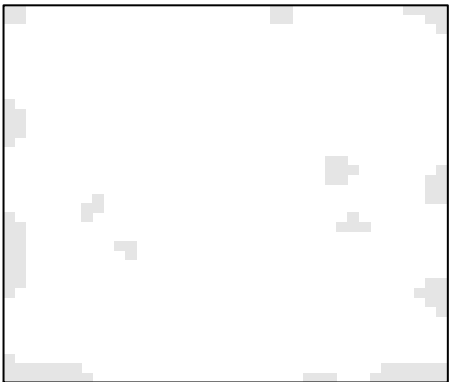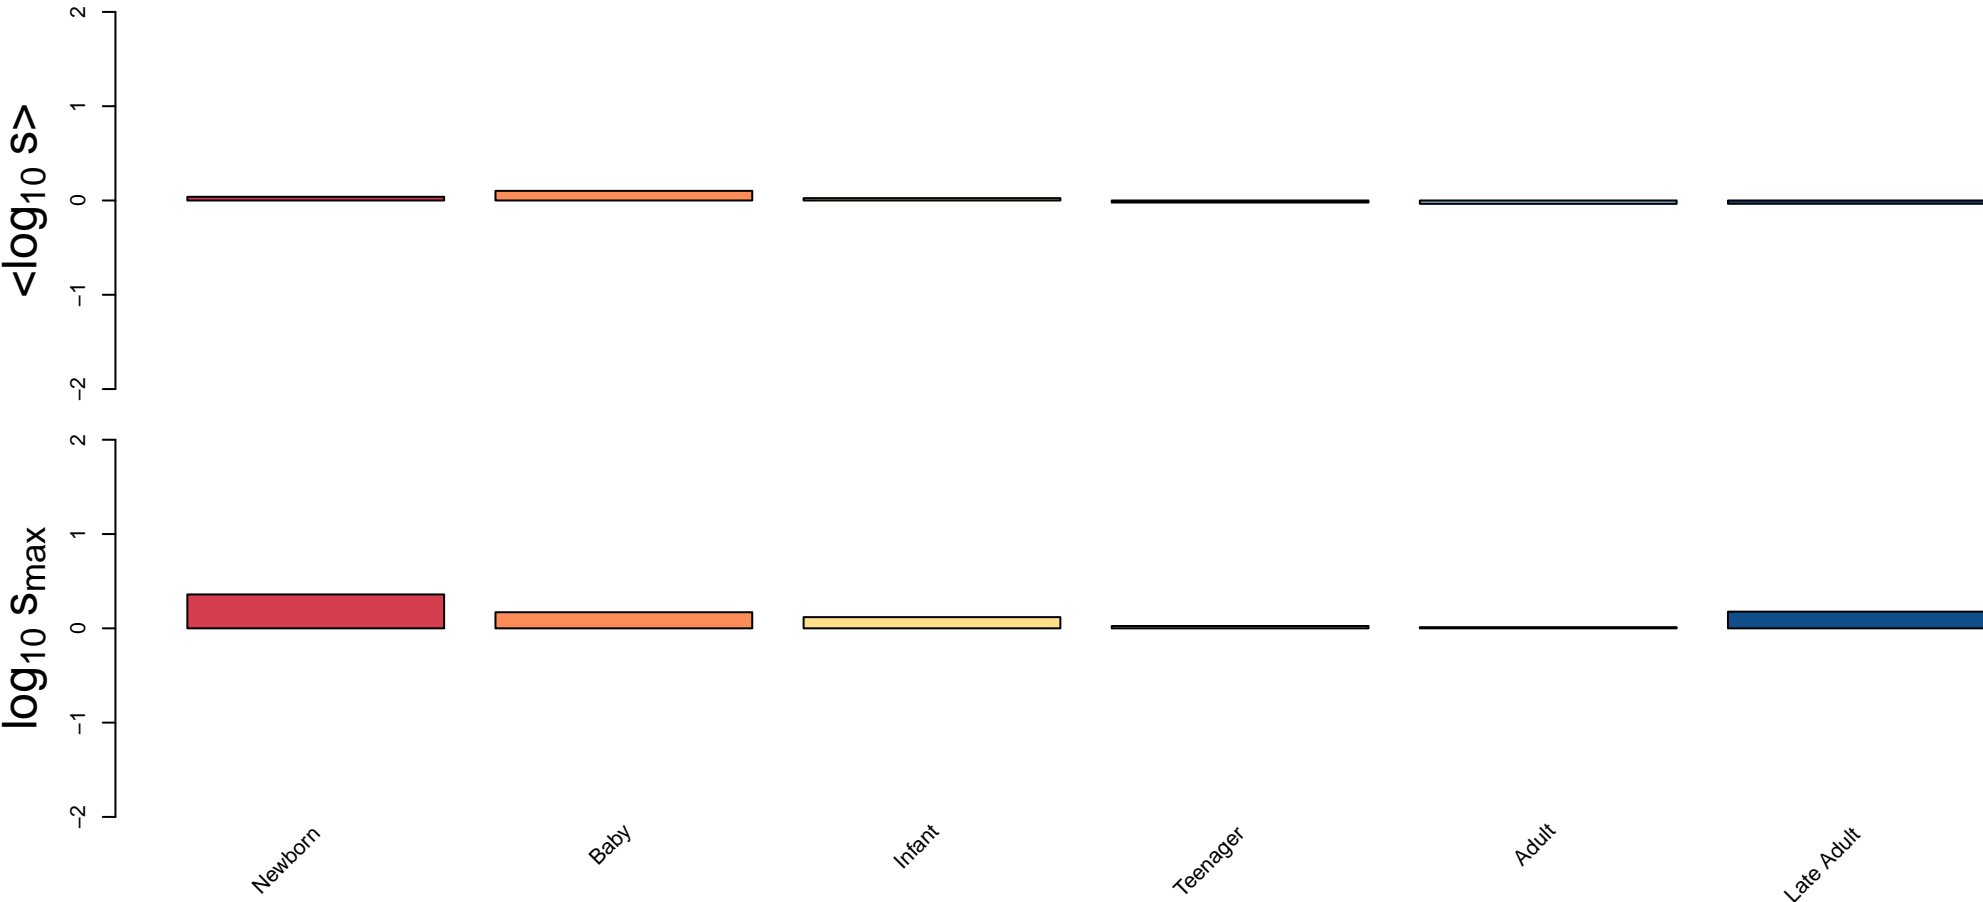

TGF\_beta\_signaling\_pathway  
genes with data

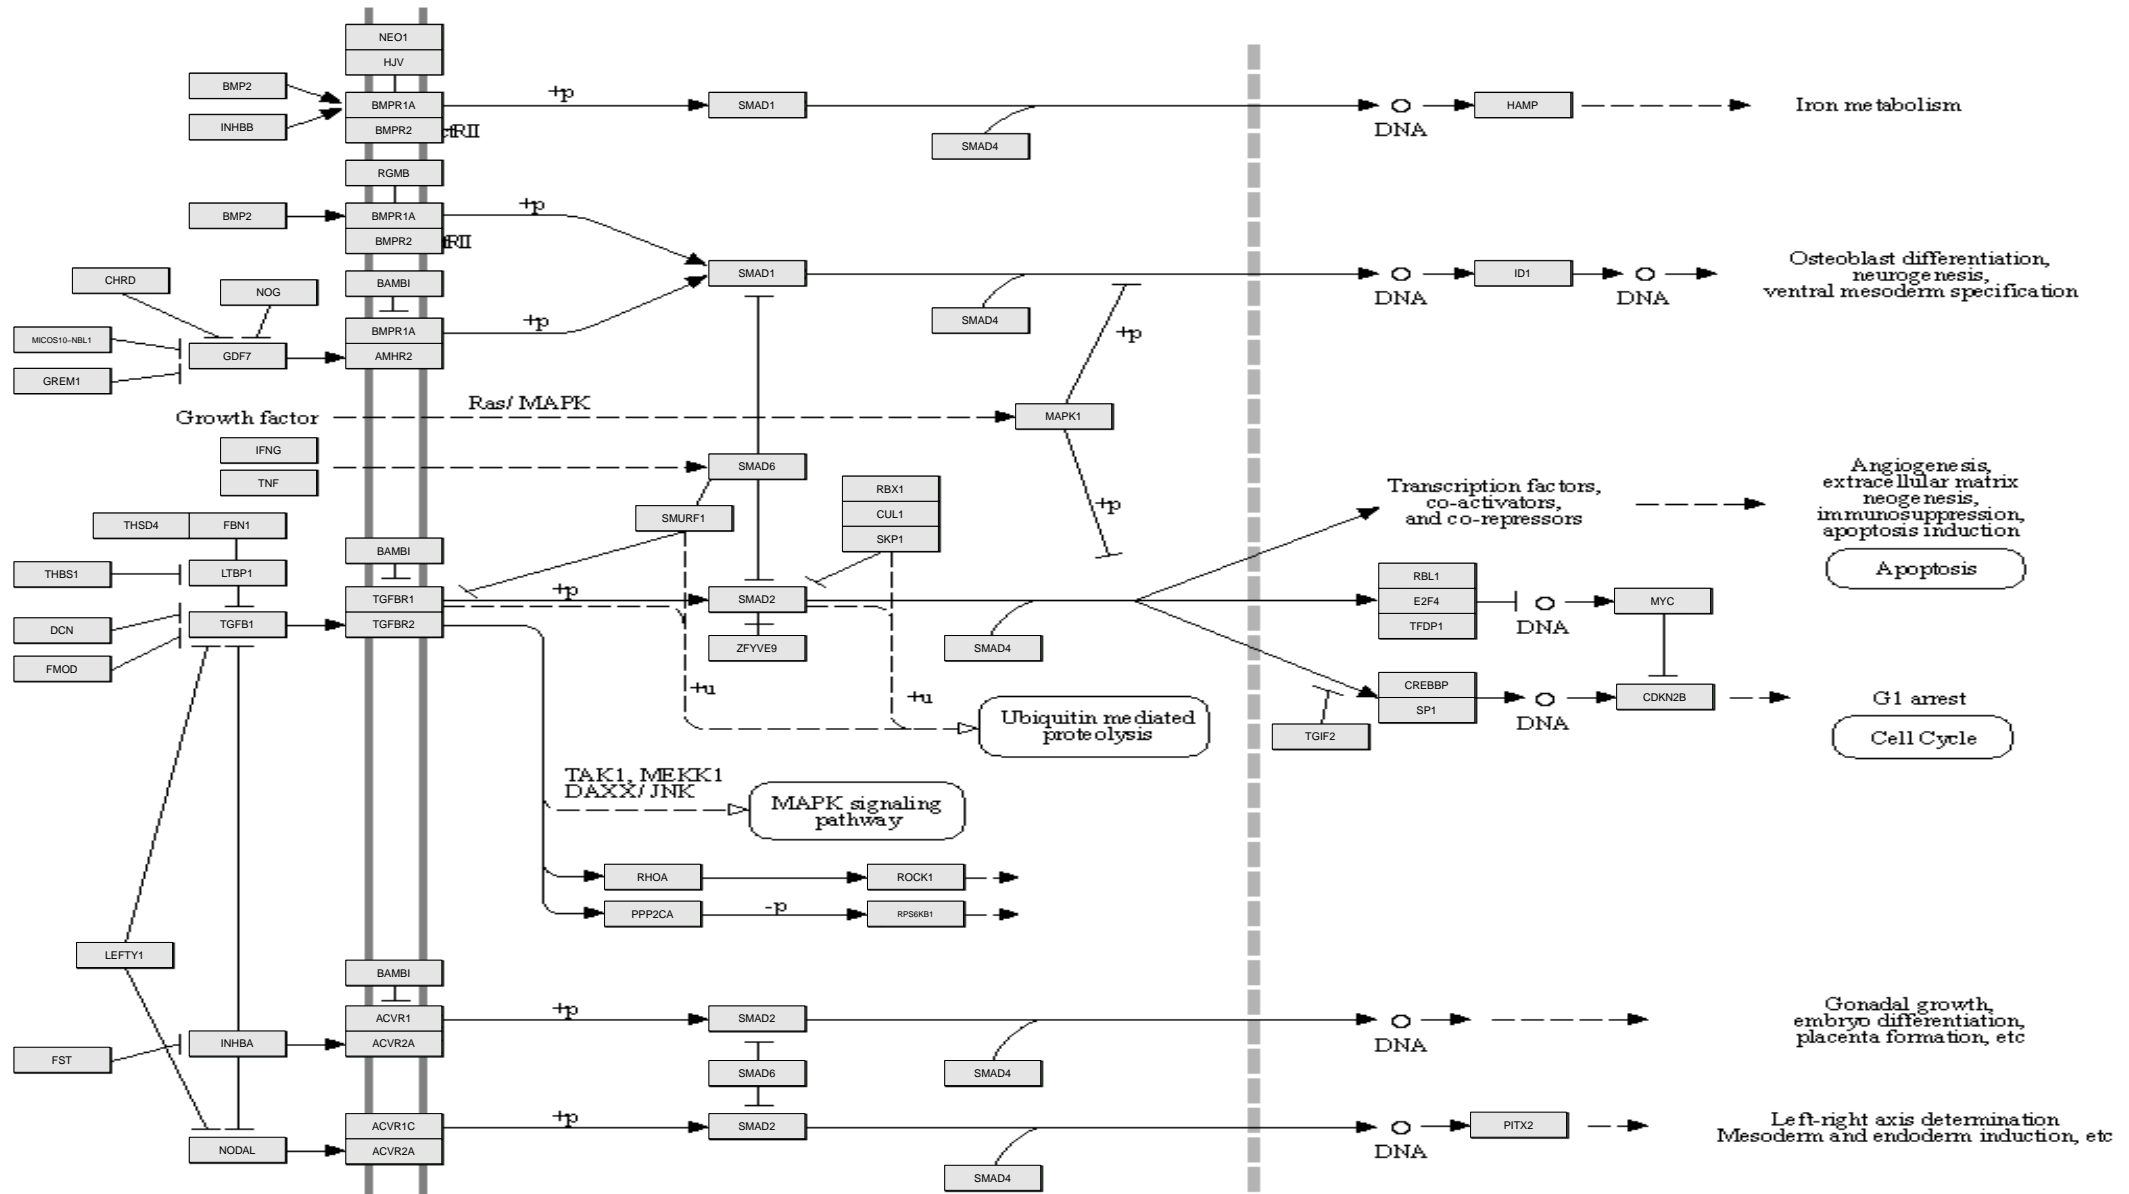

TGF\_beta\_signaling\_pathway  
sink nodes



TGF\_beta\_signaling\_pathway  
Newborn



TGF\_beta\_signaling\_pathway  
Baby

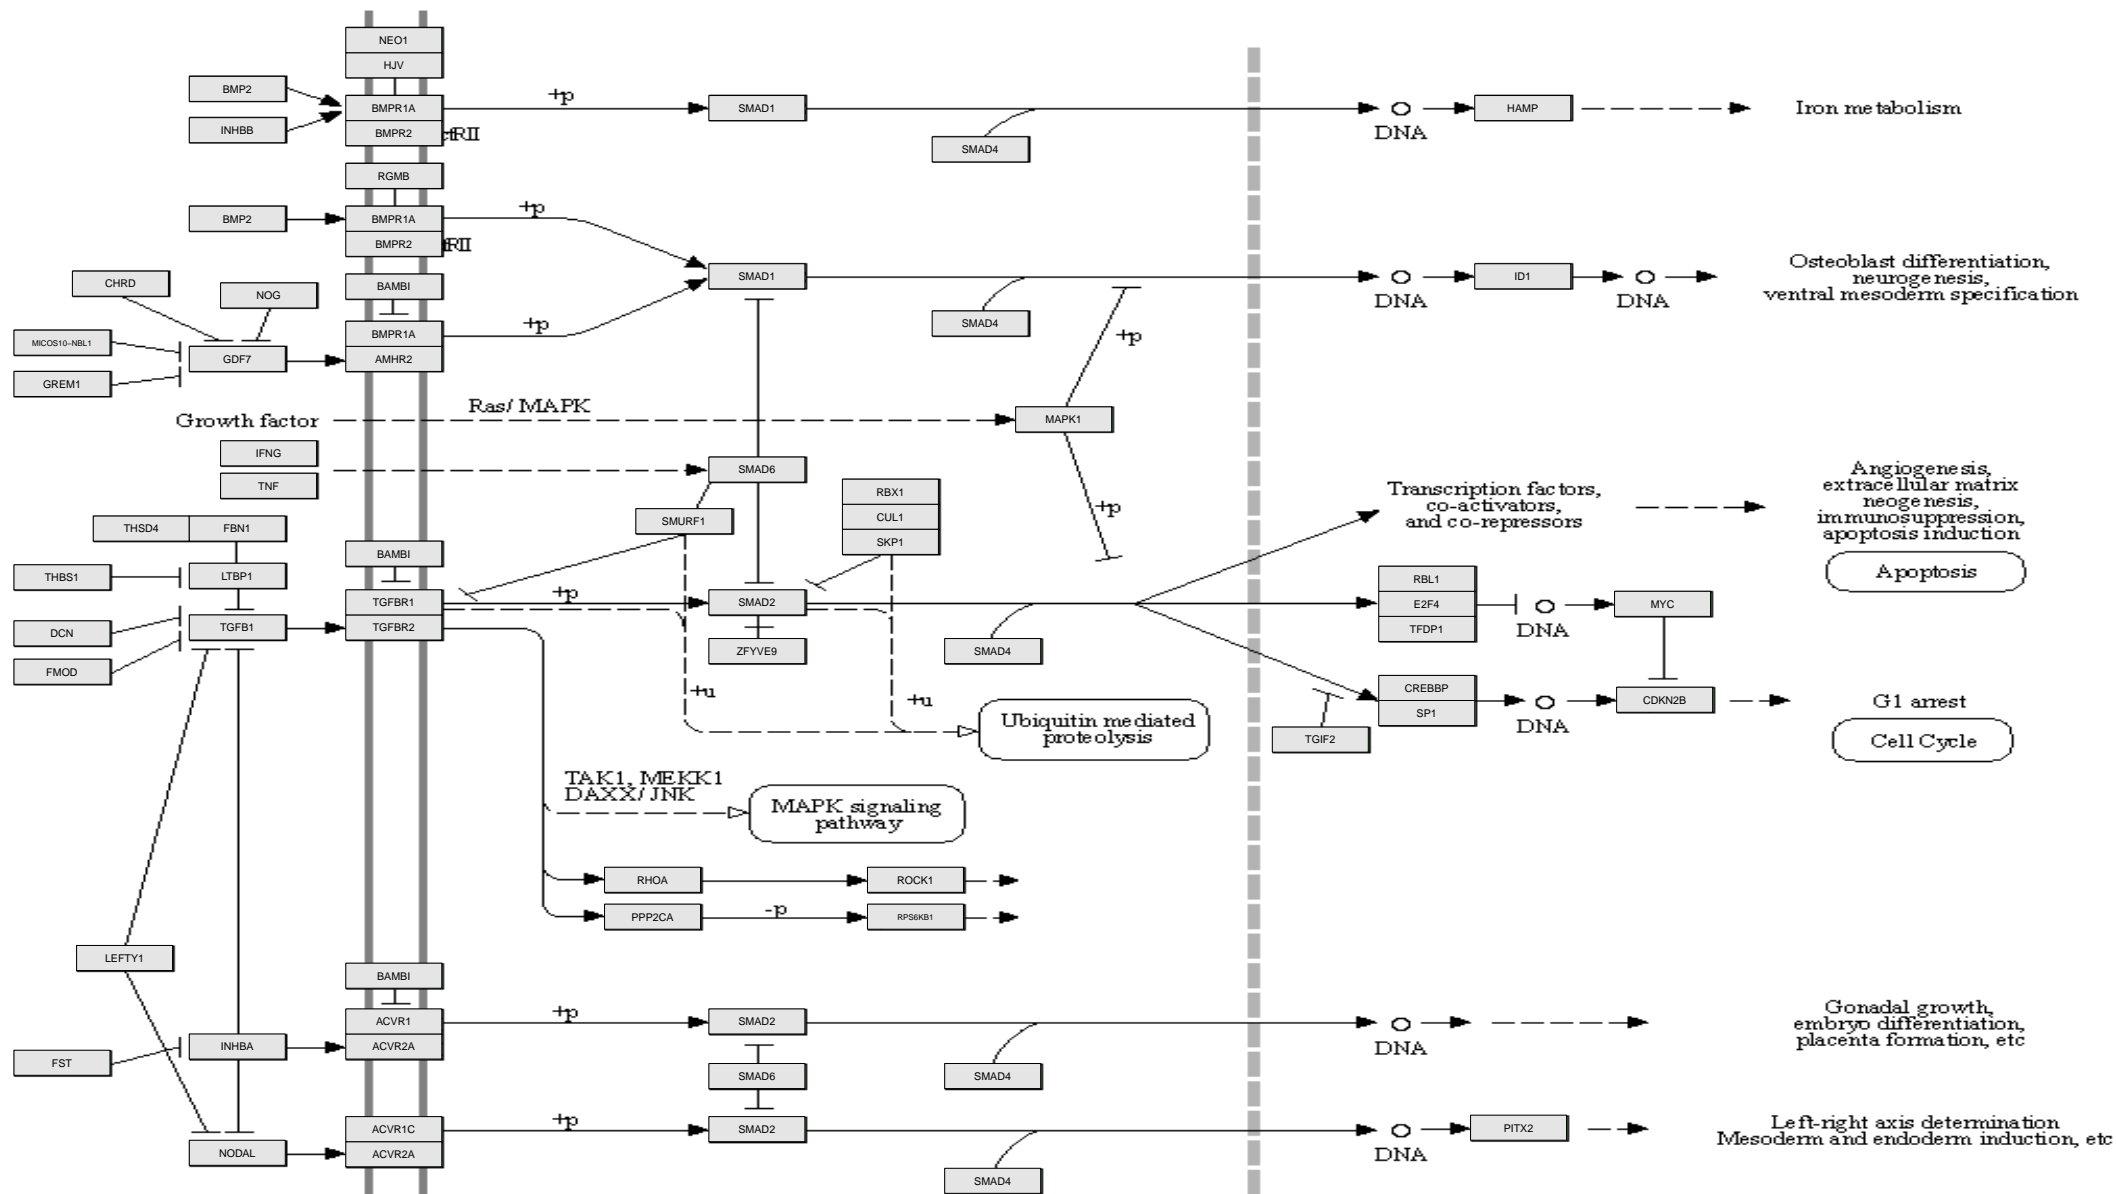

TGF\_beta\_signaling\_pathway  
Infant



TGF\_beta\_signaling\_pathway  
Teenager



TGF\_beta\_signaling\_pathway  
Adult

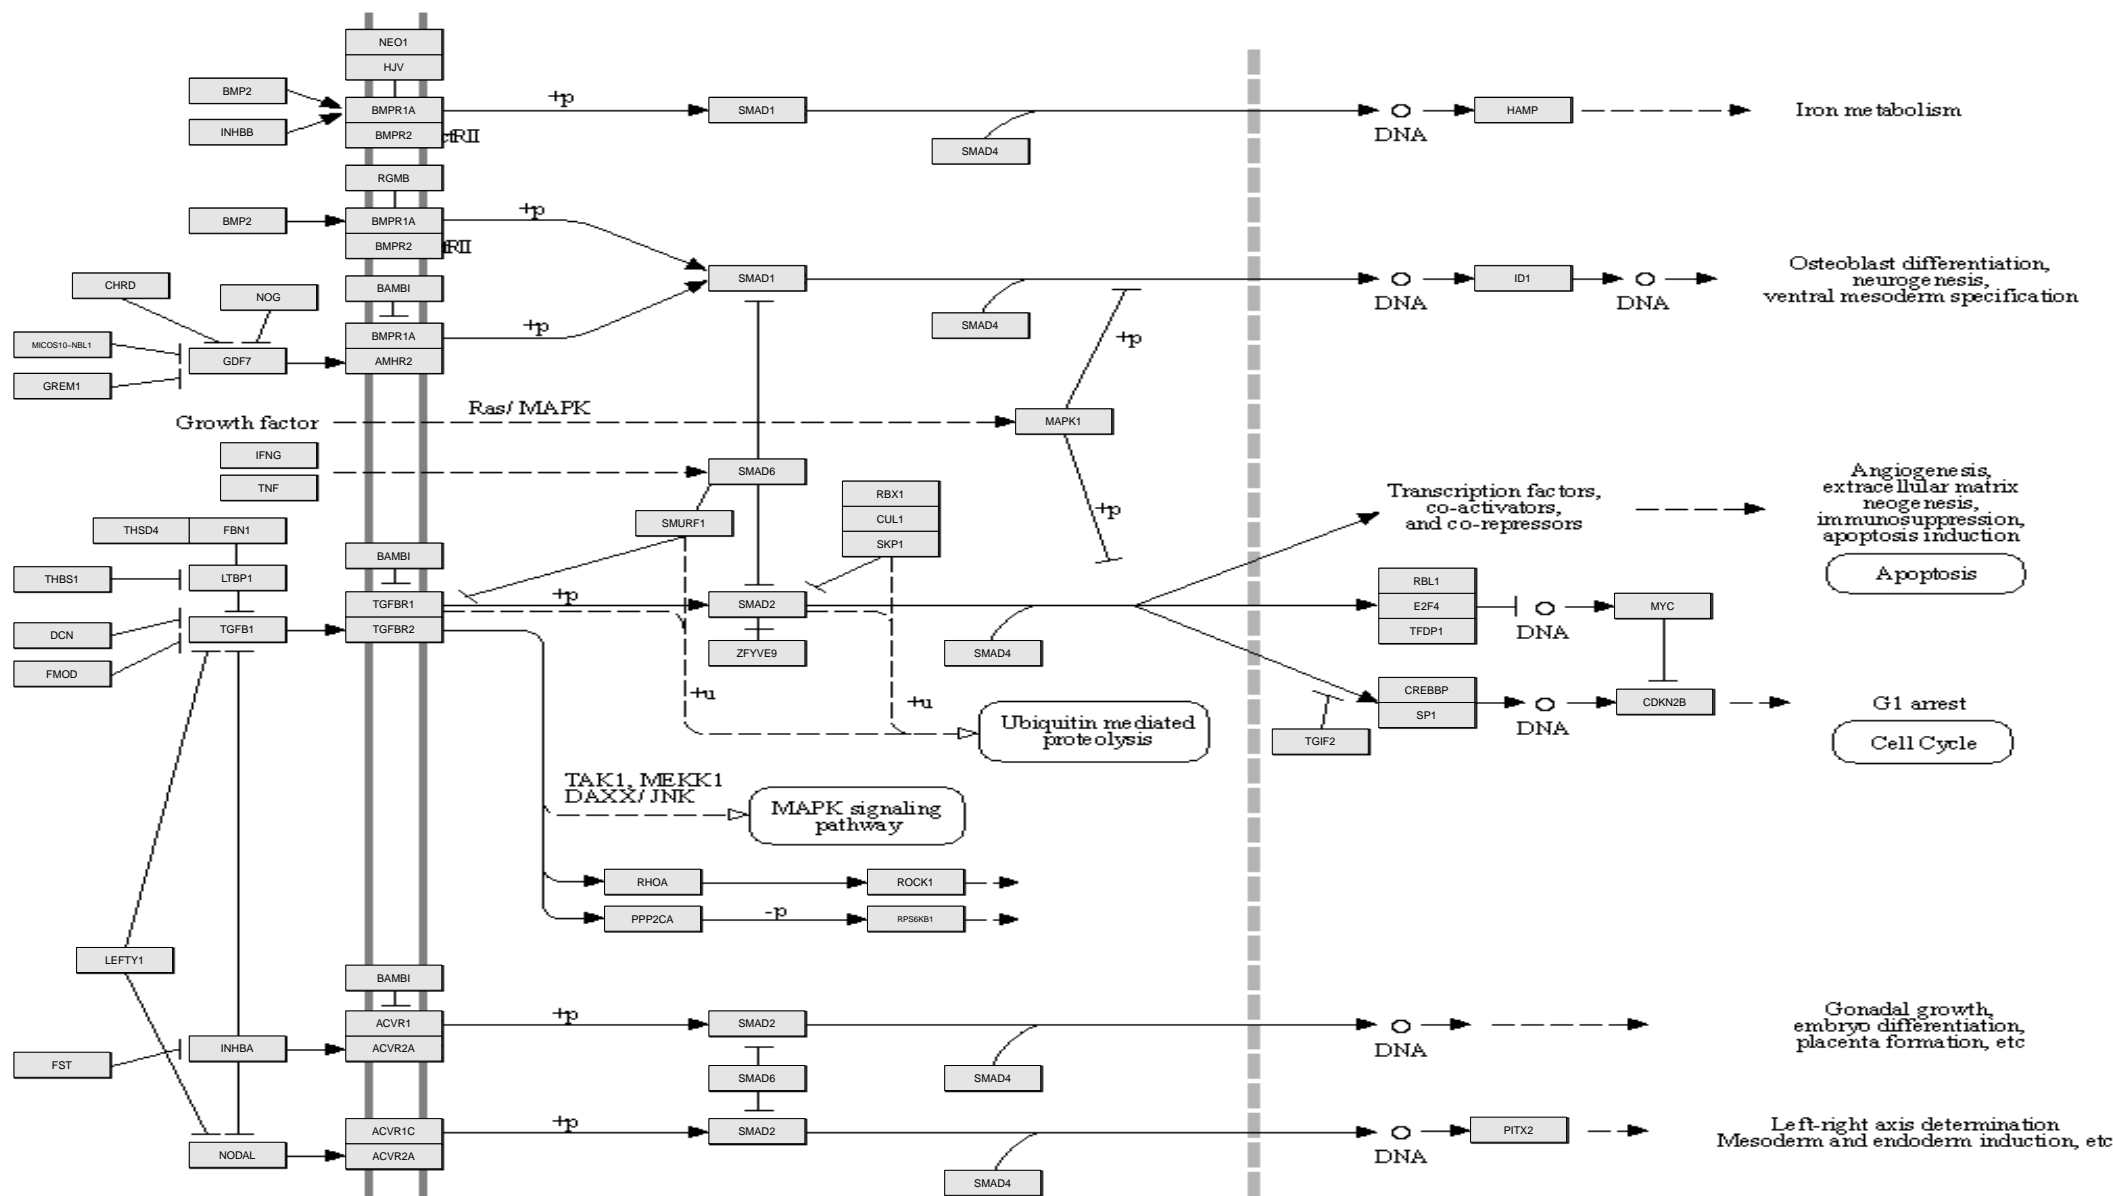



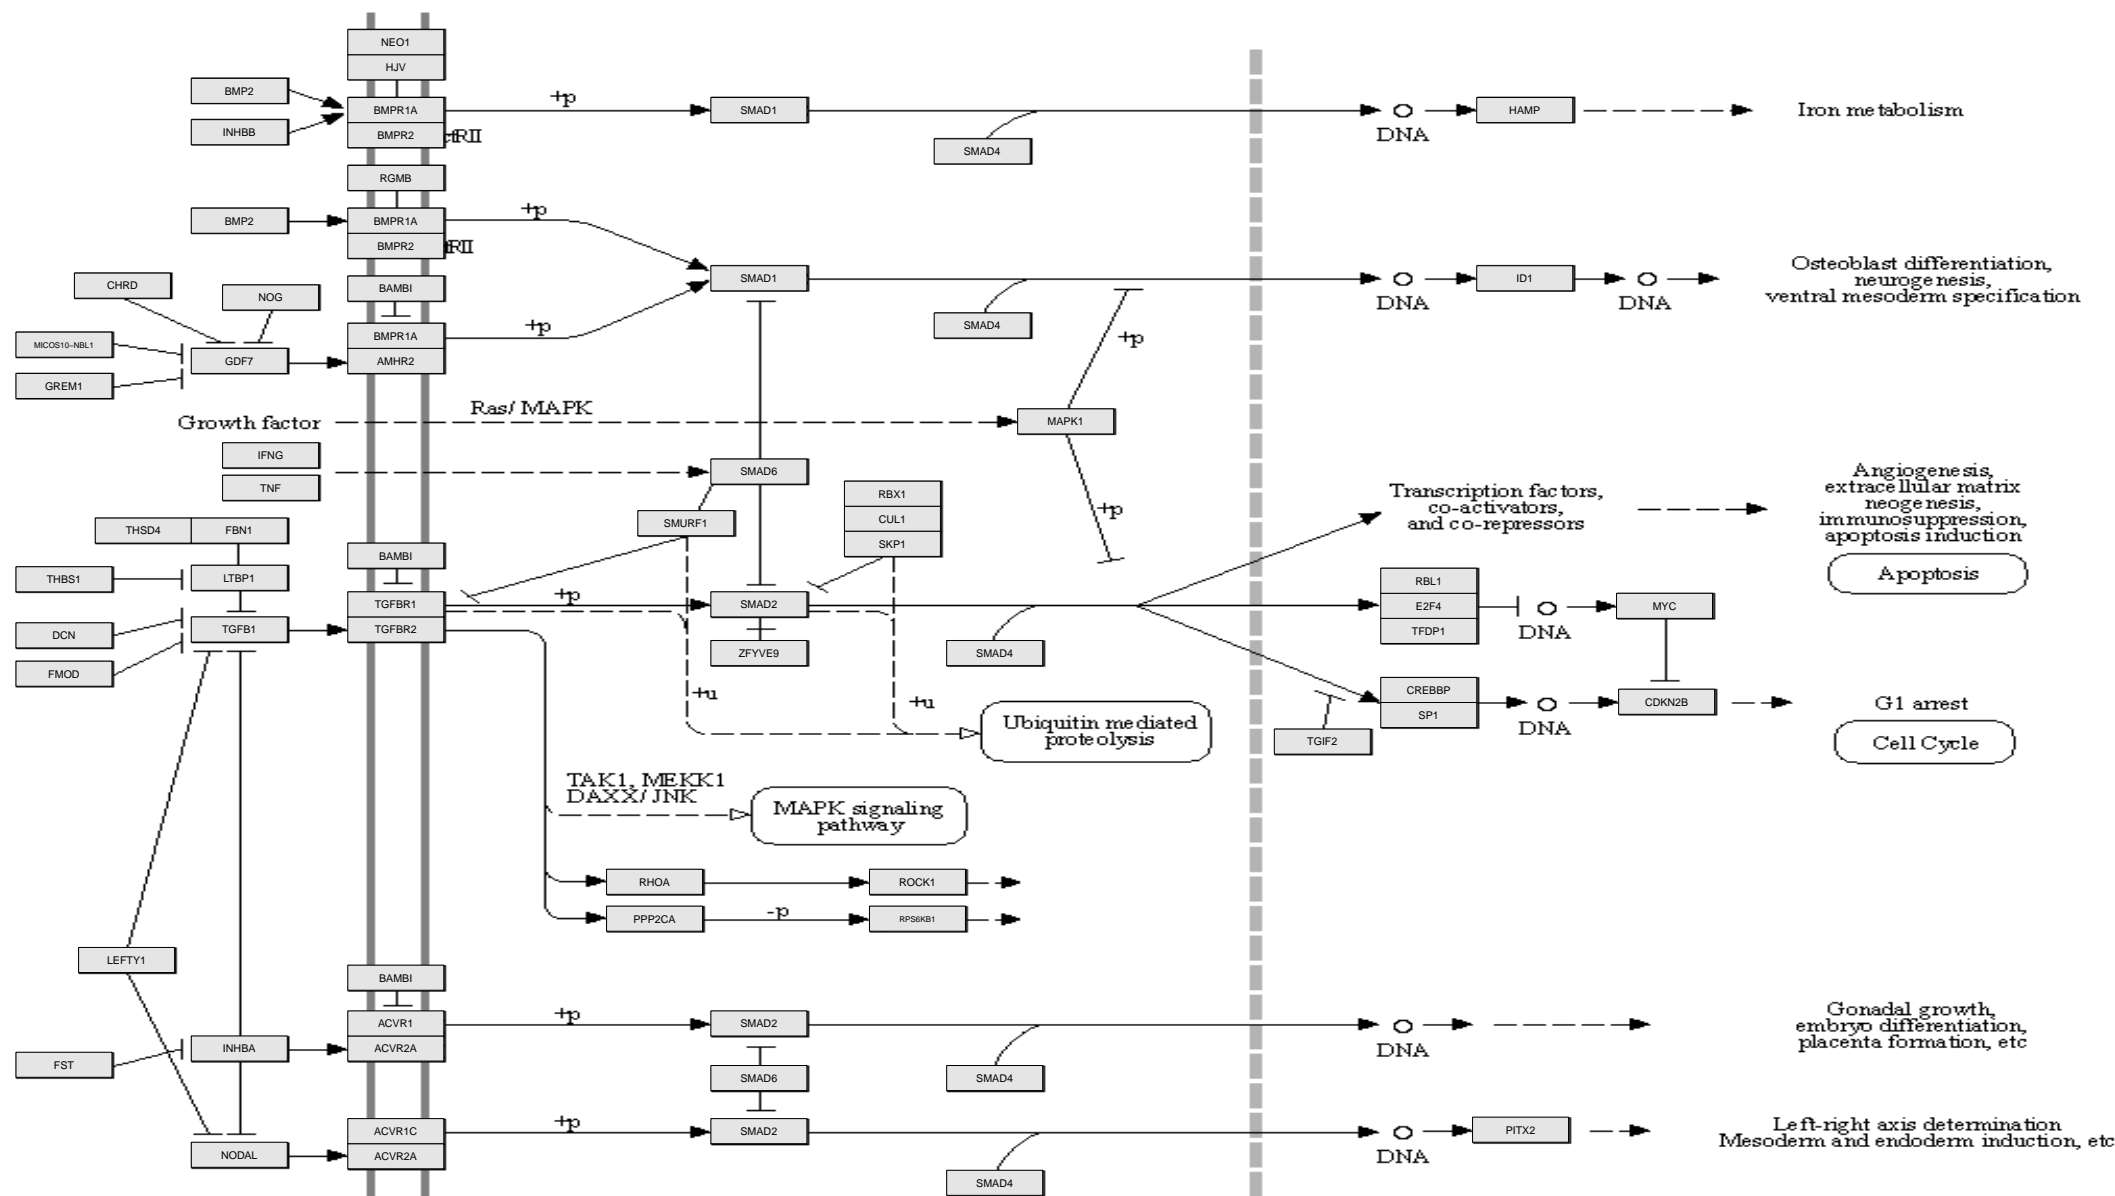

Supplement: s1 [file s1]
