# Supplementary material for: The Transcriptome and Methylome of the Developing and Aging Brain and Their Relations to Gliomas and Psychological Disorders
Source: MDPI journal article supplement (doi:10.3390/cells11030362), 2022-01-21

Notch signaling pathway

all genes

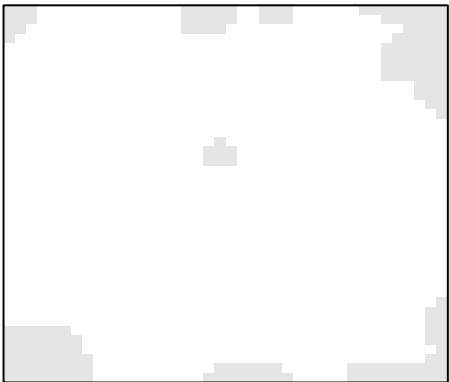

maximum = -Inf

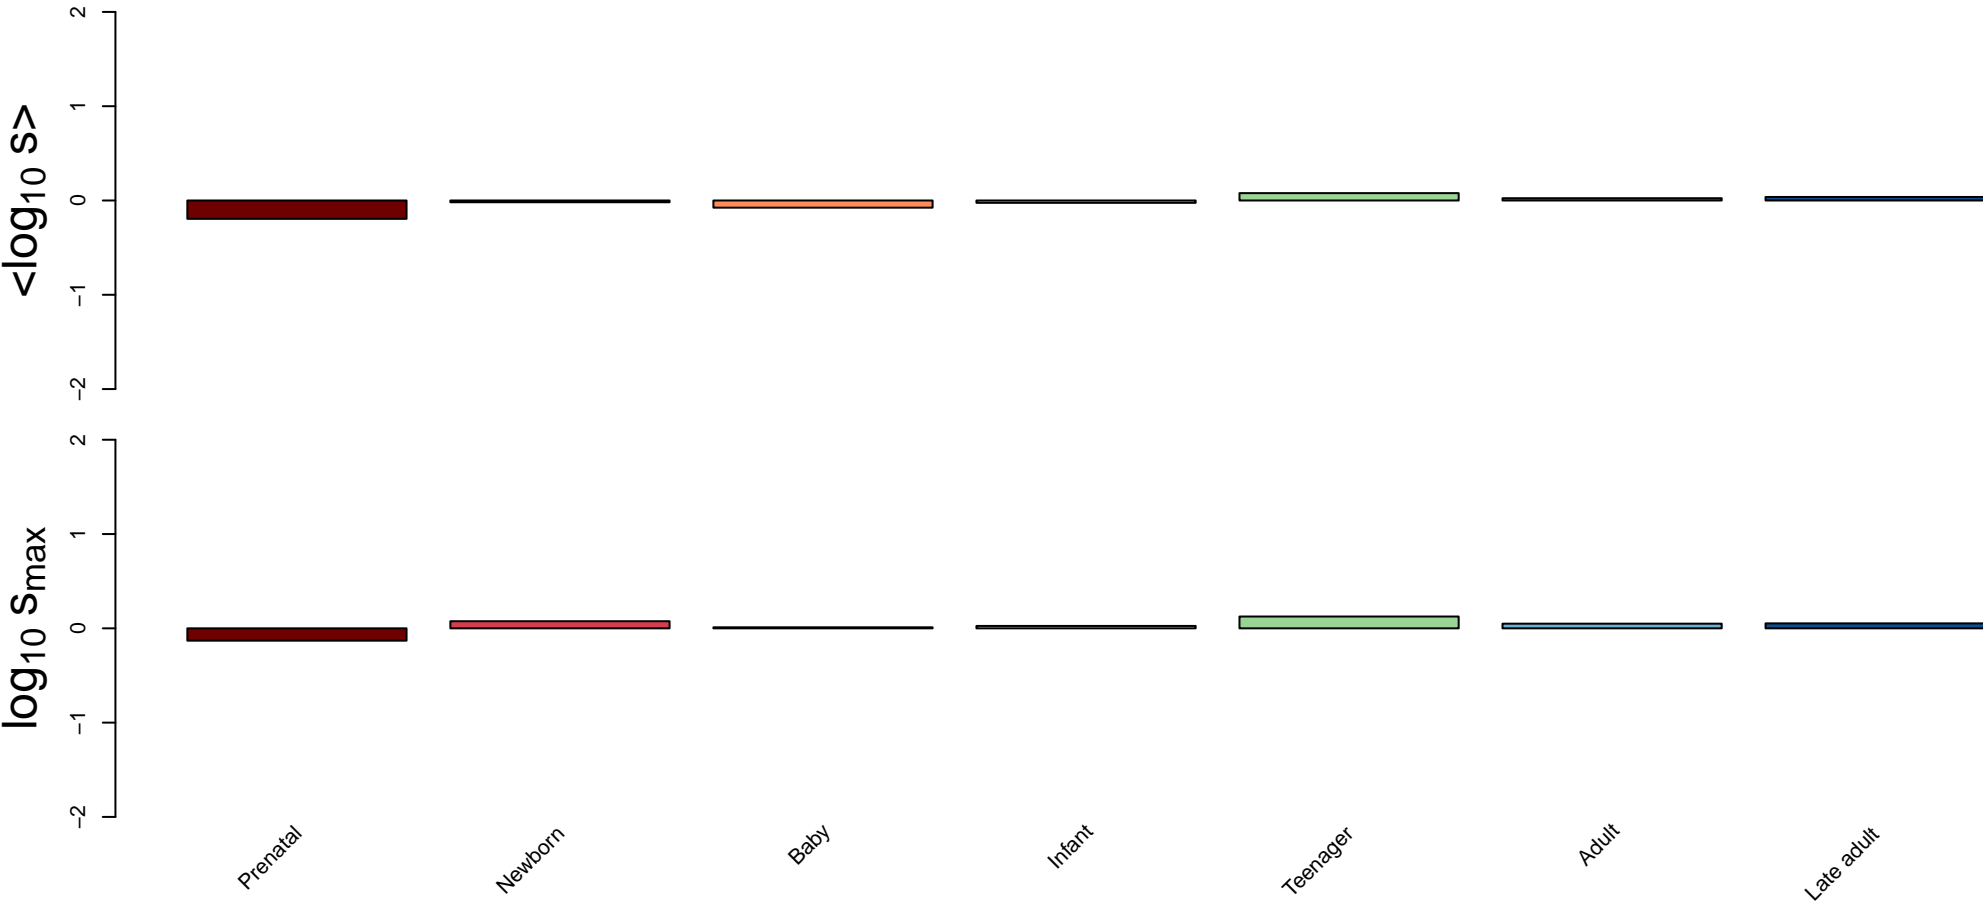

Notch\_signaling\_pathway  
genes with data

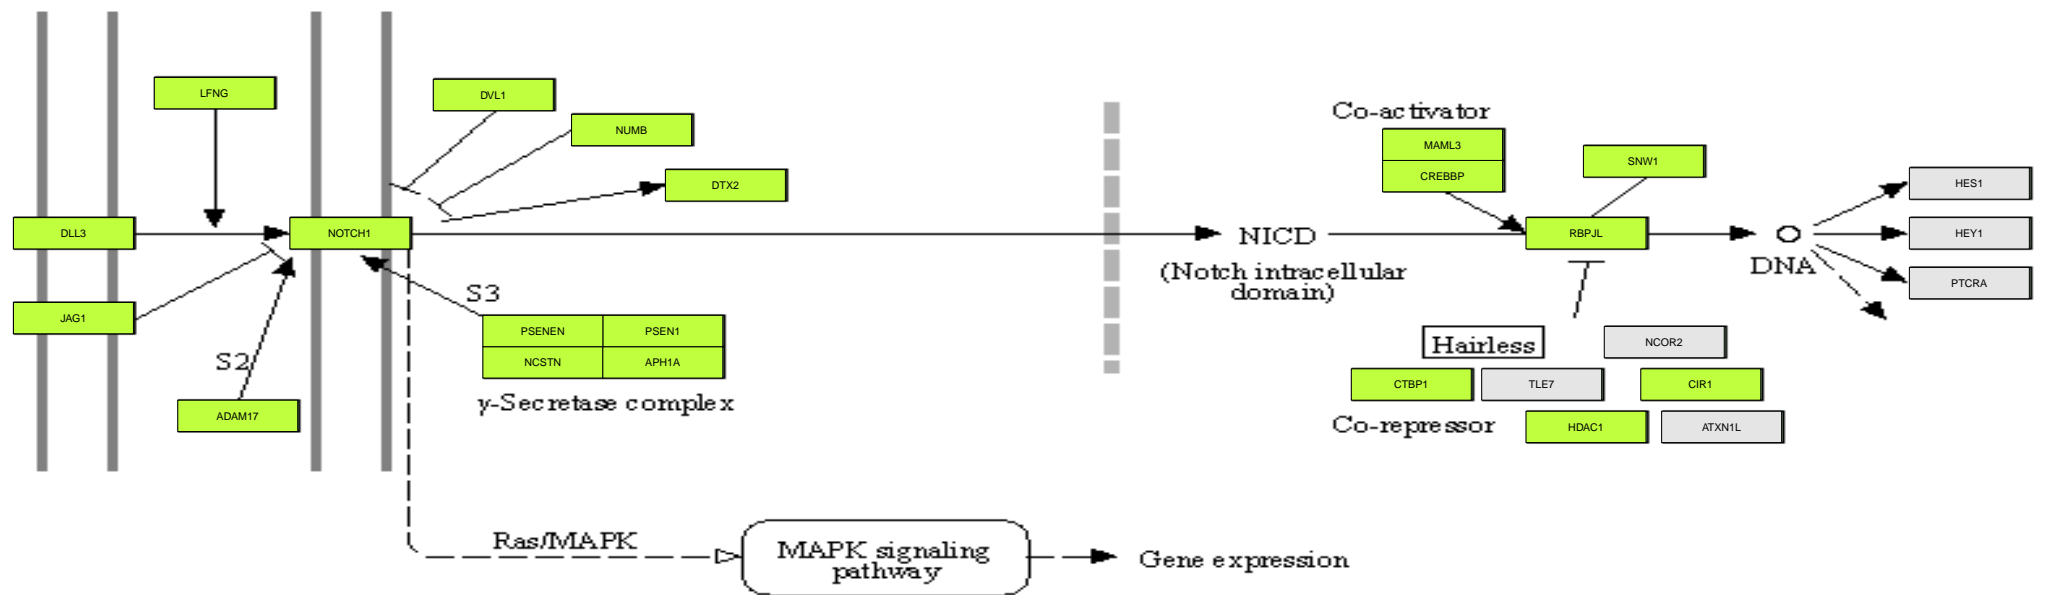

Notch\_signaling\_pathway  
sink nodes

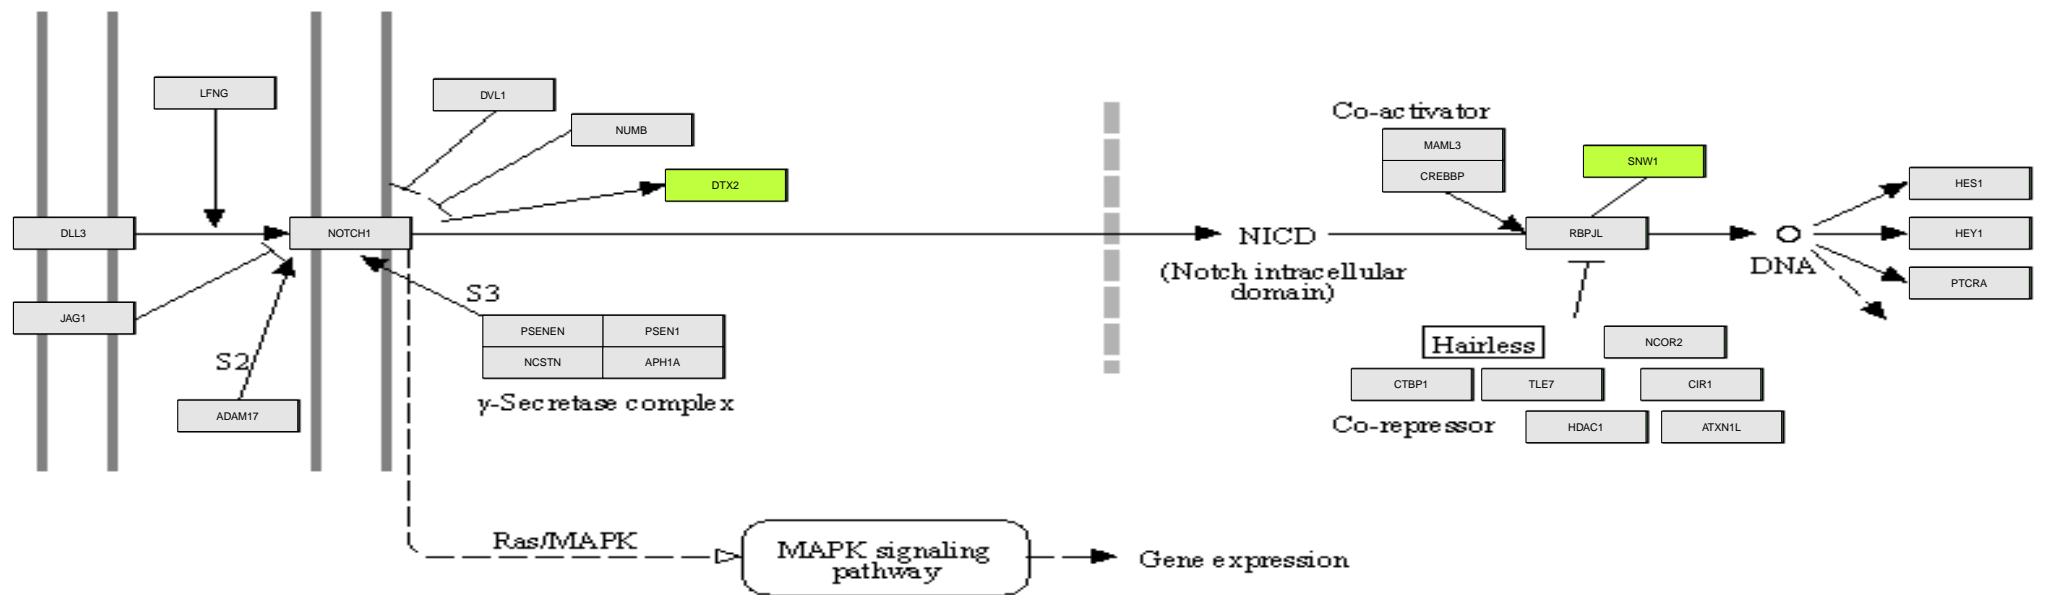

Notch signaling pathway  
Prenatal

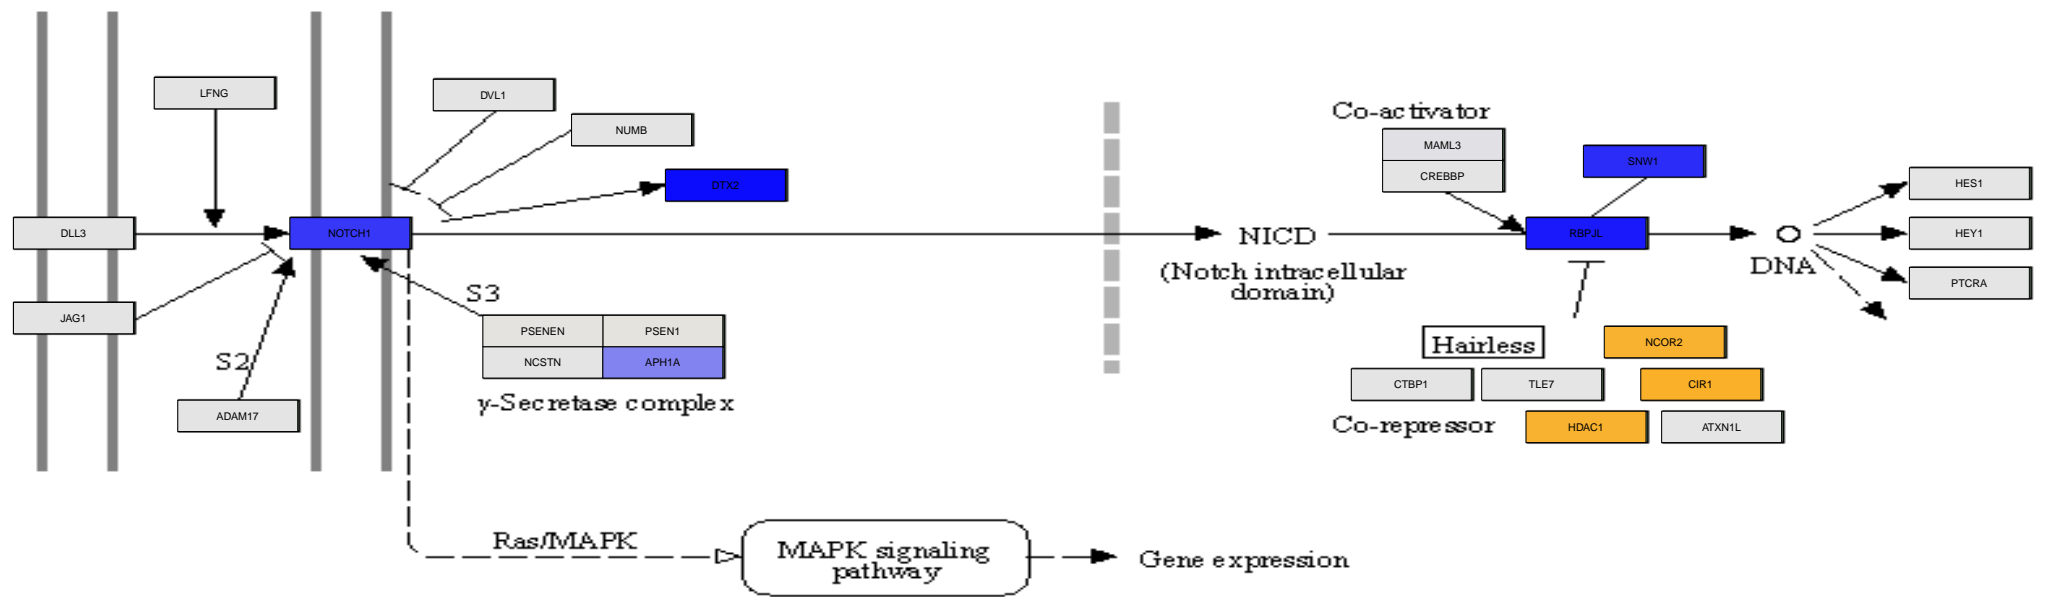

Notch signaling pathway  
Newborn

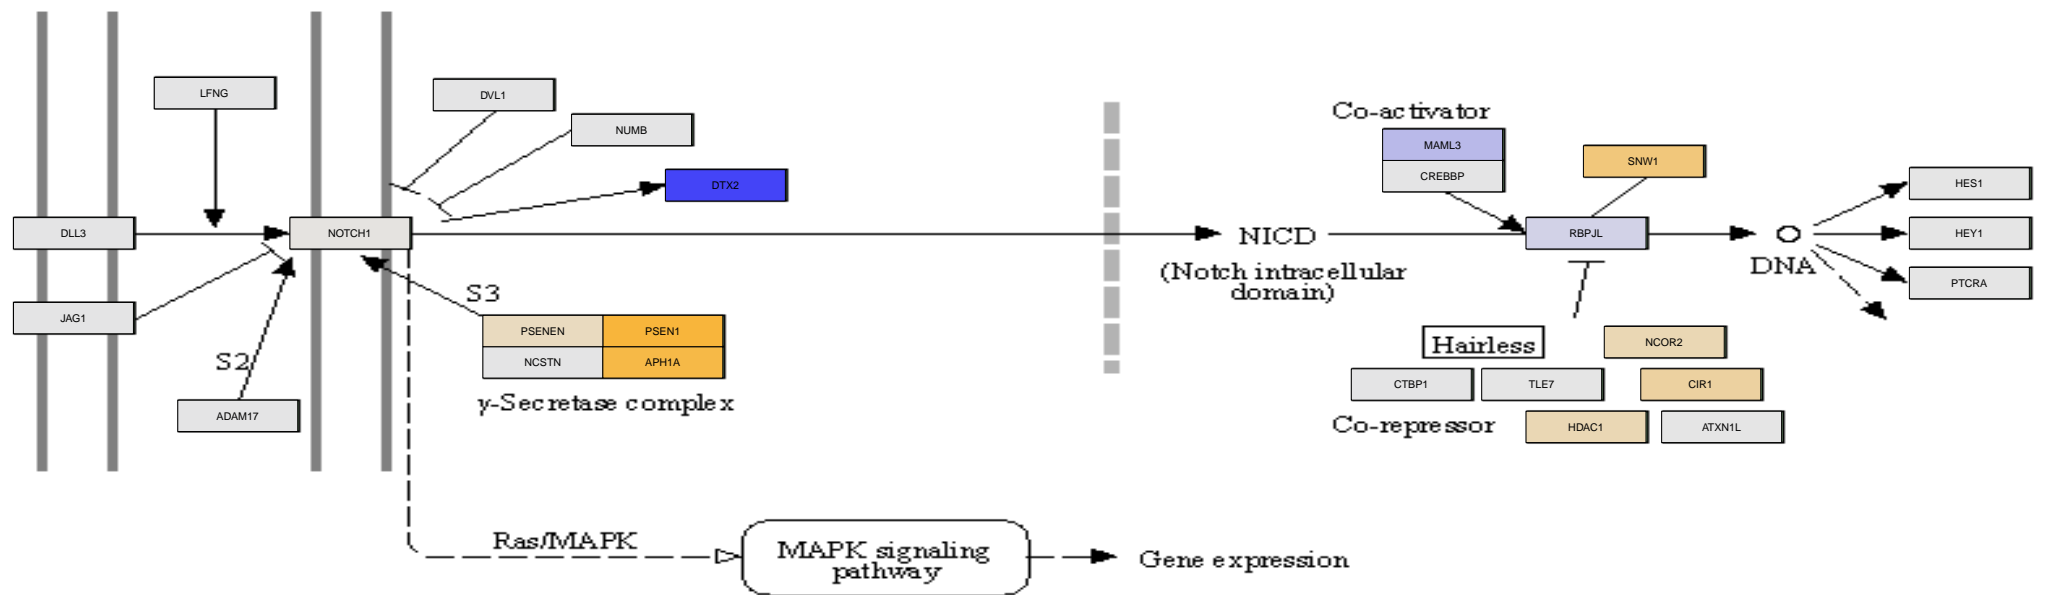

Notch signaling pathway  
Baby

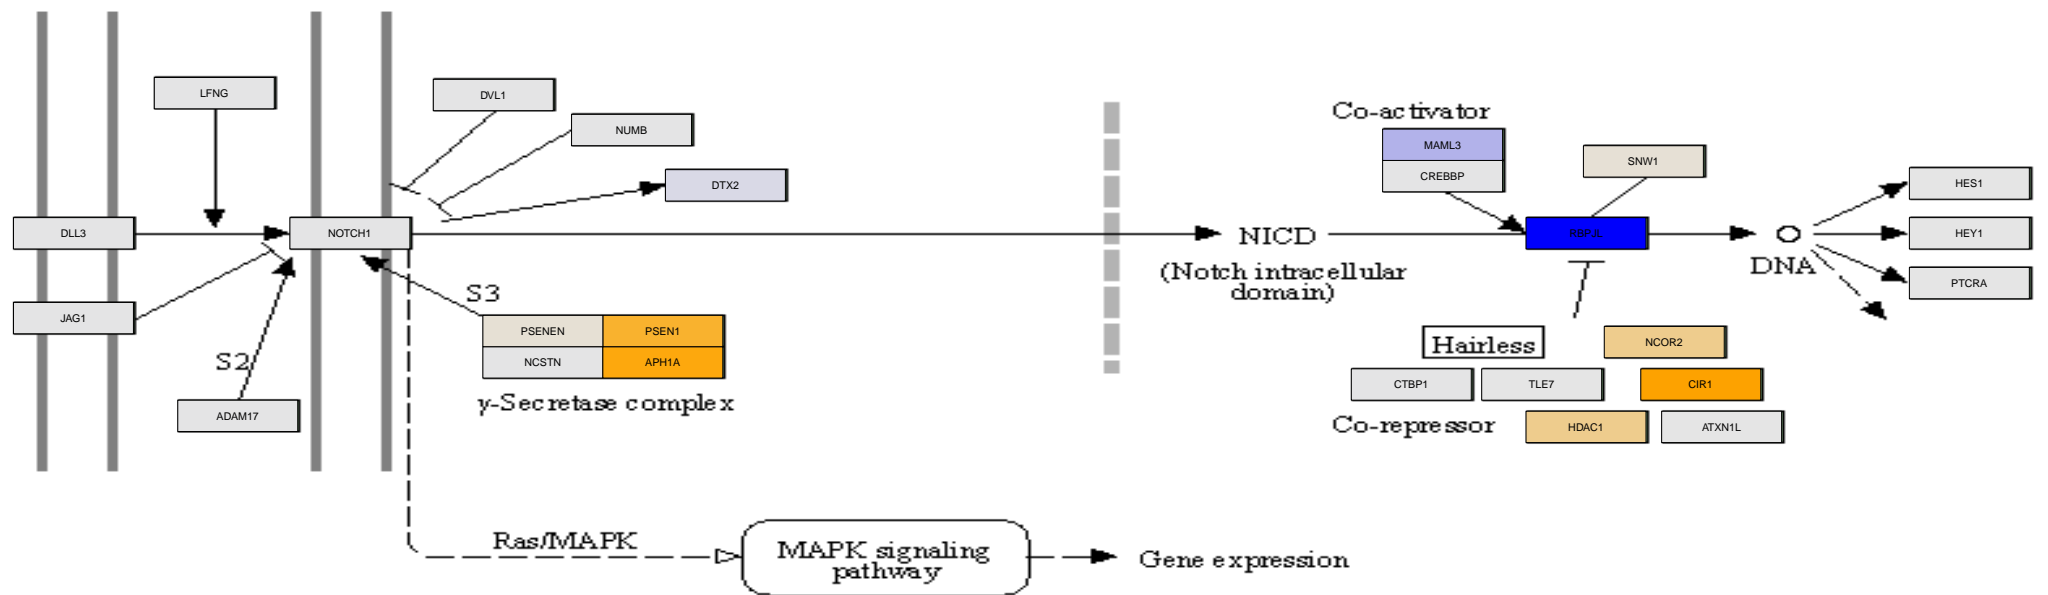

Notch signaling pathway  
Infant

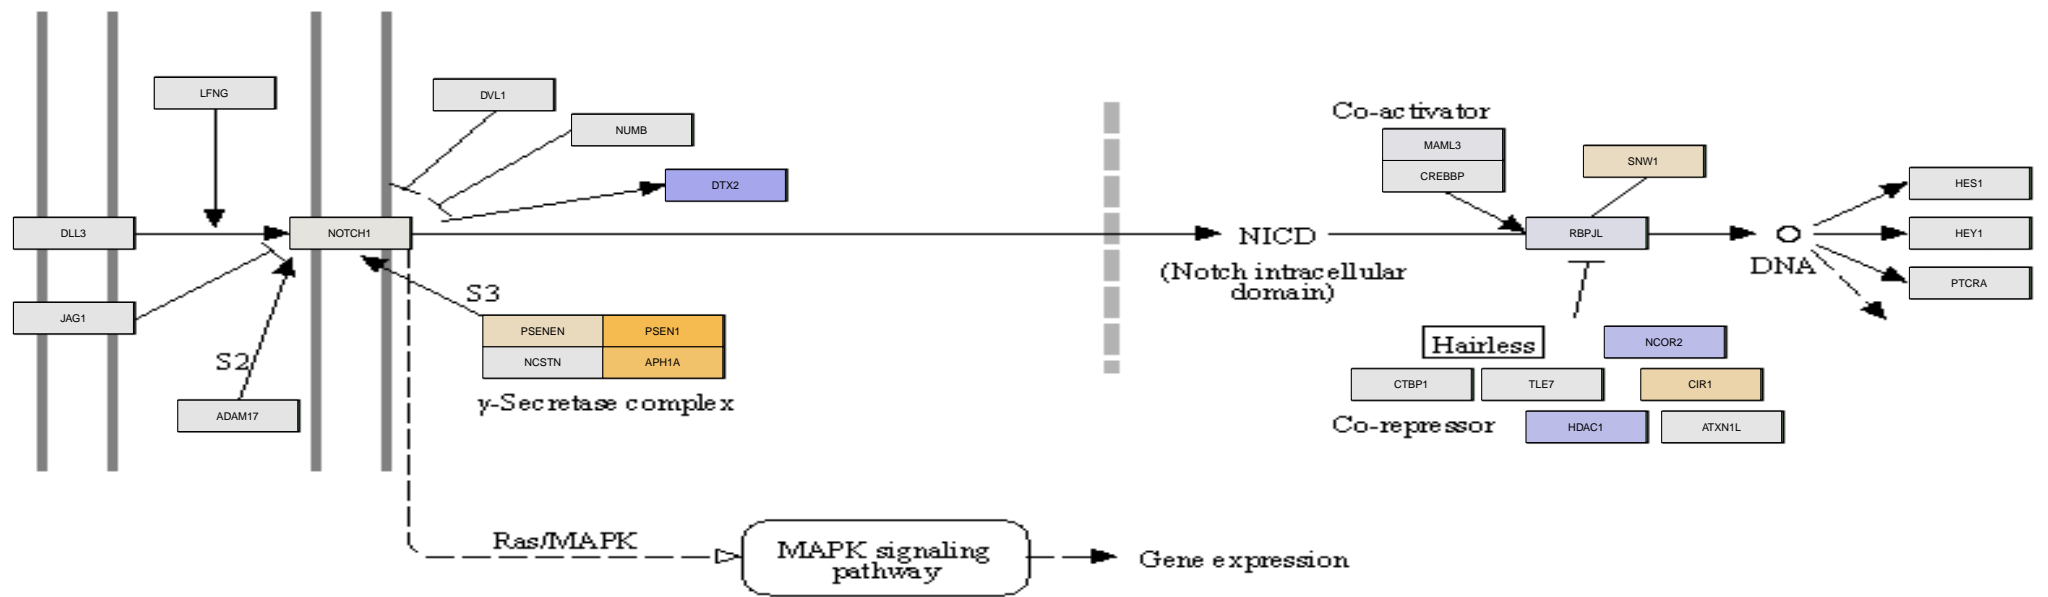

Notch\_signaling\_pathway  
Teenager

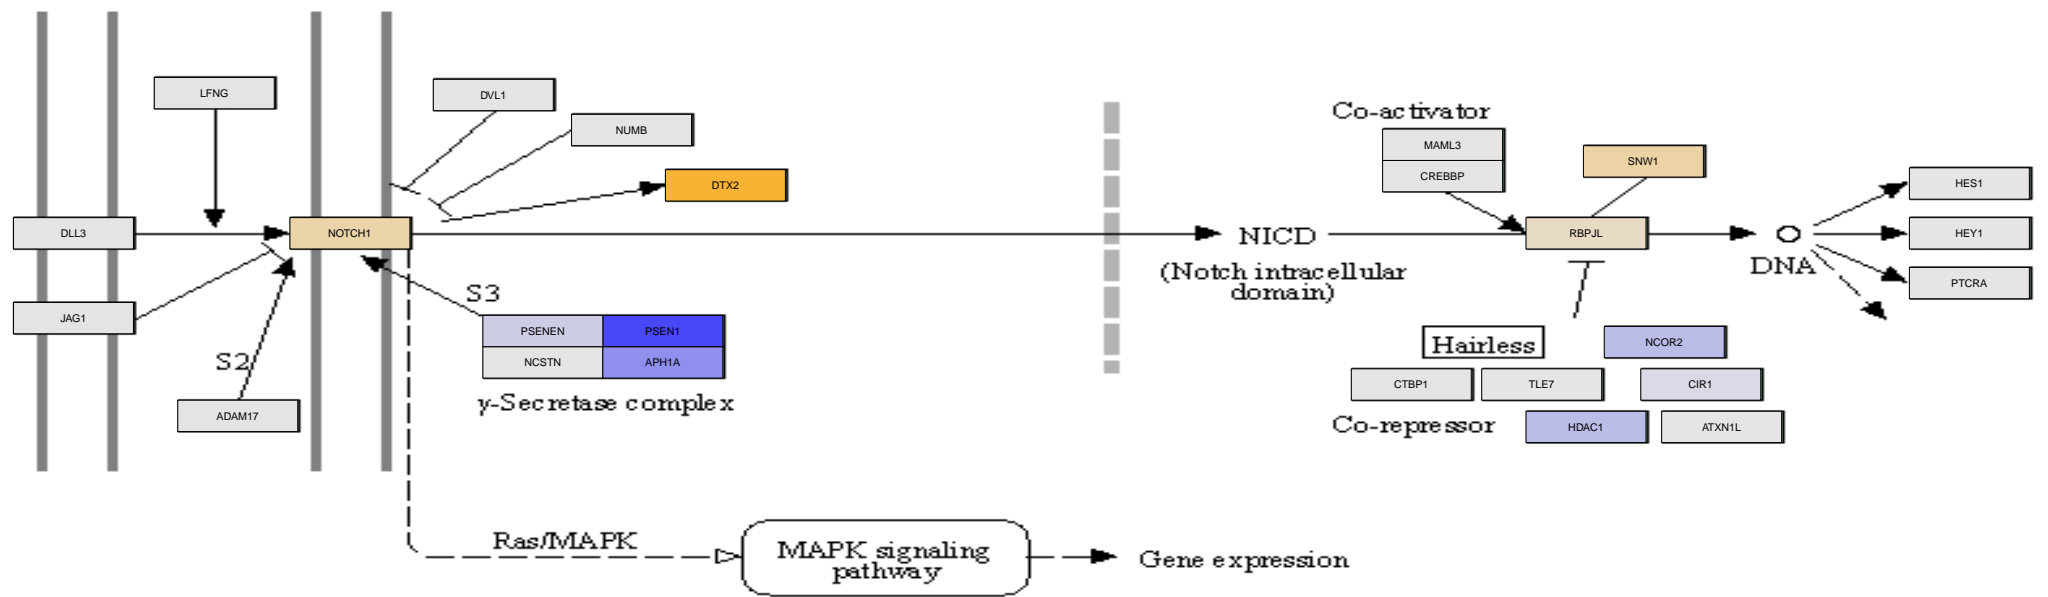



Notch\_signaling\_pathway  
Adult

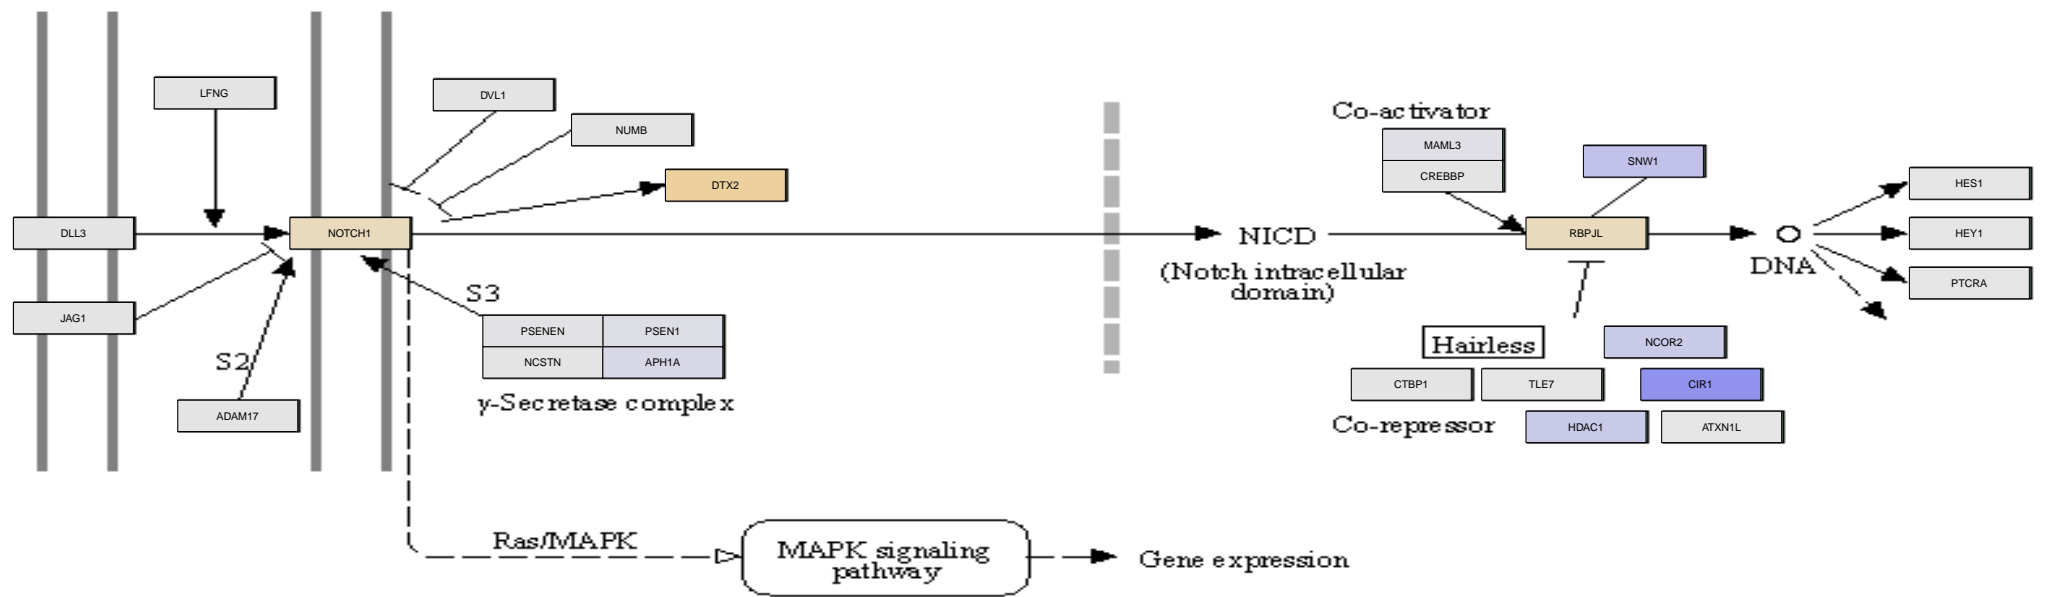

Notch signaling pathway  
Late adult

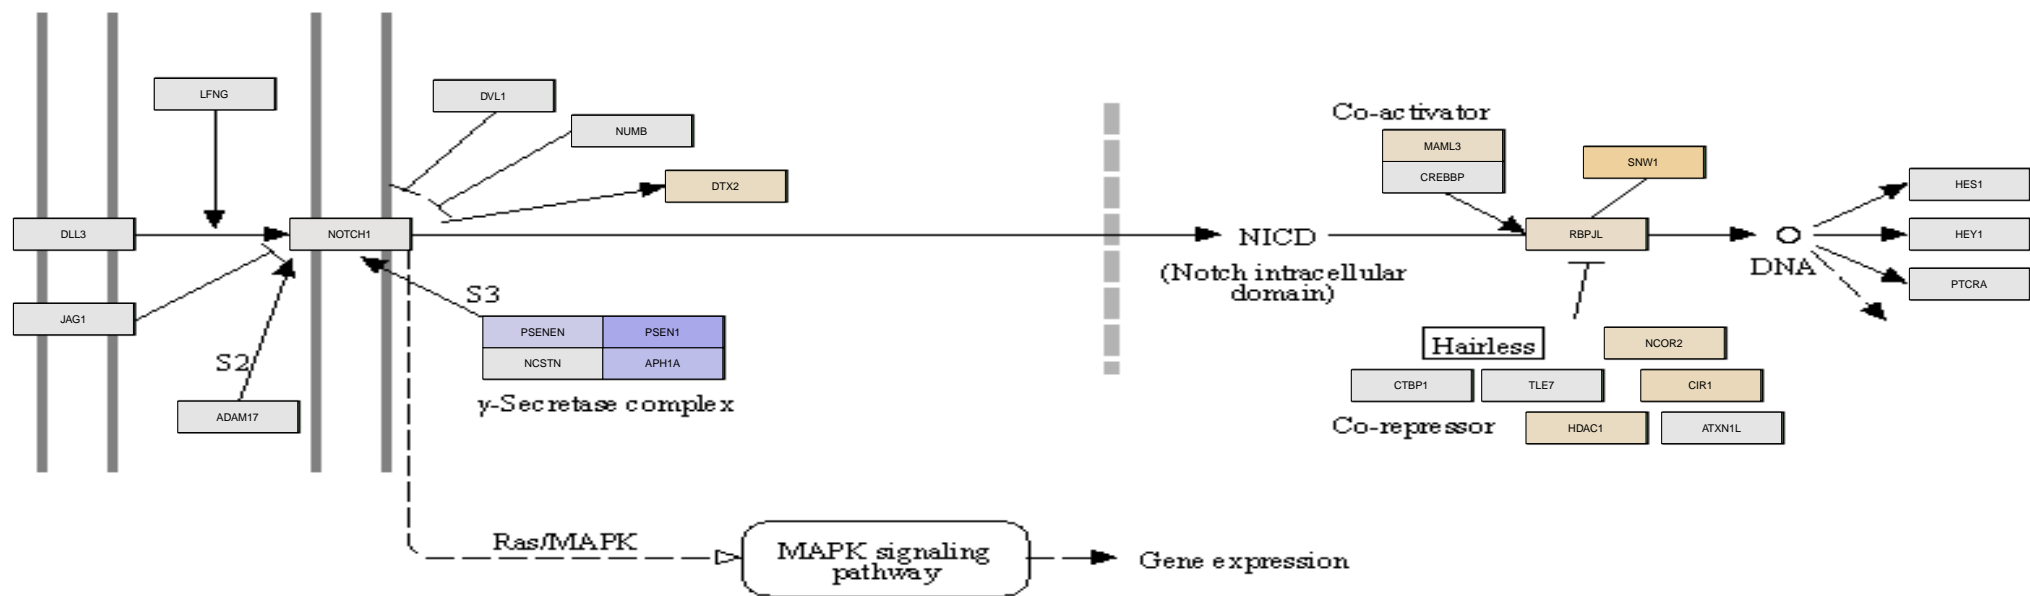

Supplement: s1 [file s1]
