# Supplementary material for: The Transcriptome and Methylome of the Developing and Aging Brain and Their Relations to Gliomas and Psychological Disorders
Source: MDPI journal article supplement (doi:10.3390/cells11030362), 2022-01-21

C-type lectin receptor signaling path

all genes

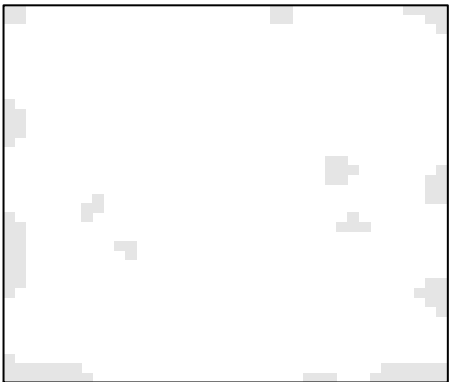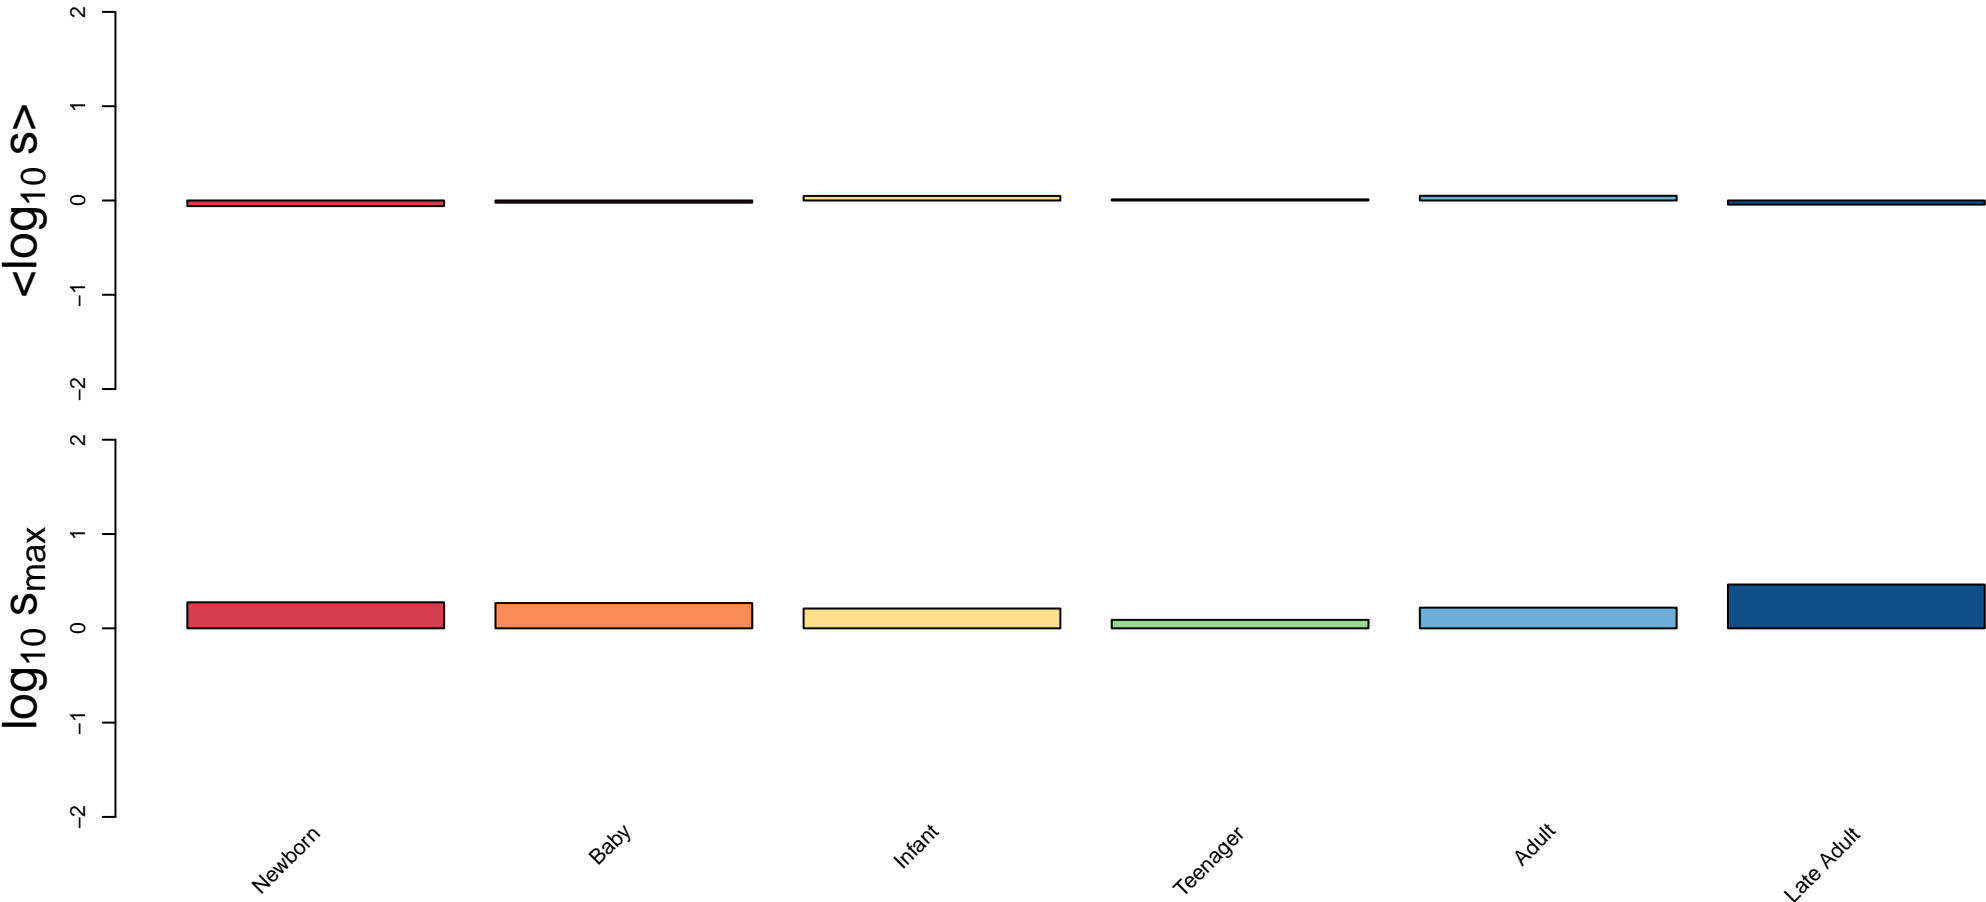

C\_type\_lectin\_receptor\_signaling\_pathway  
genes with data

Dendritic cell, macrophage, neutrophil, etc

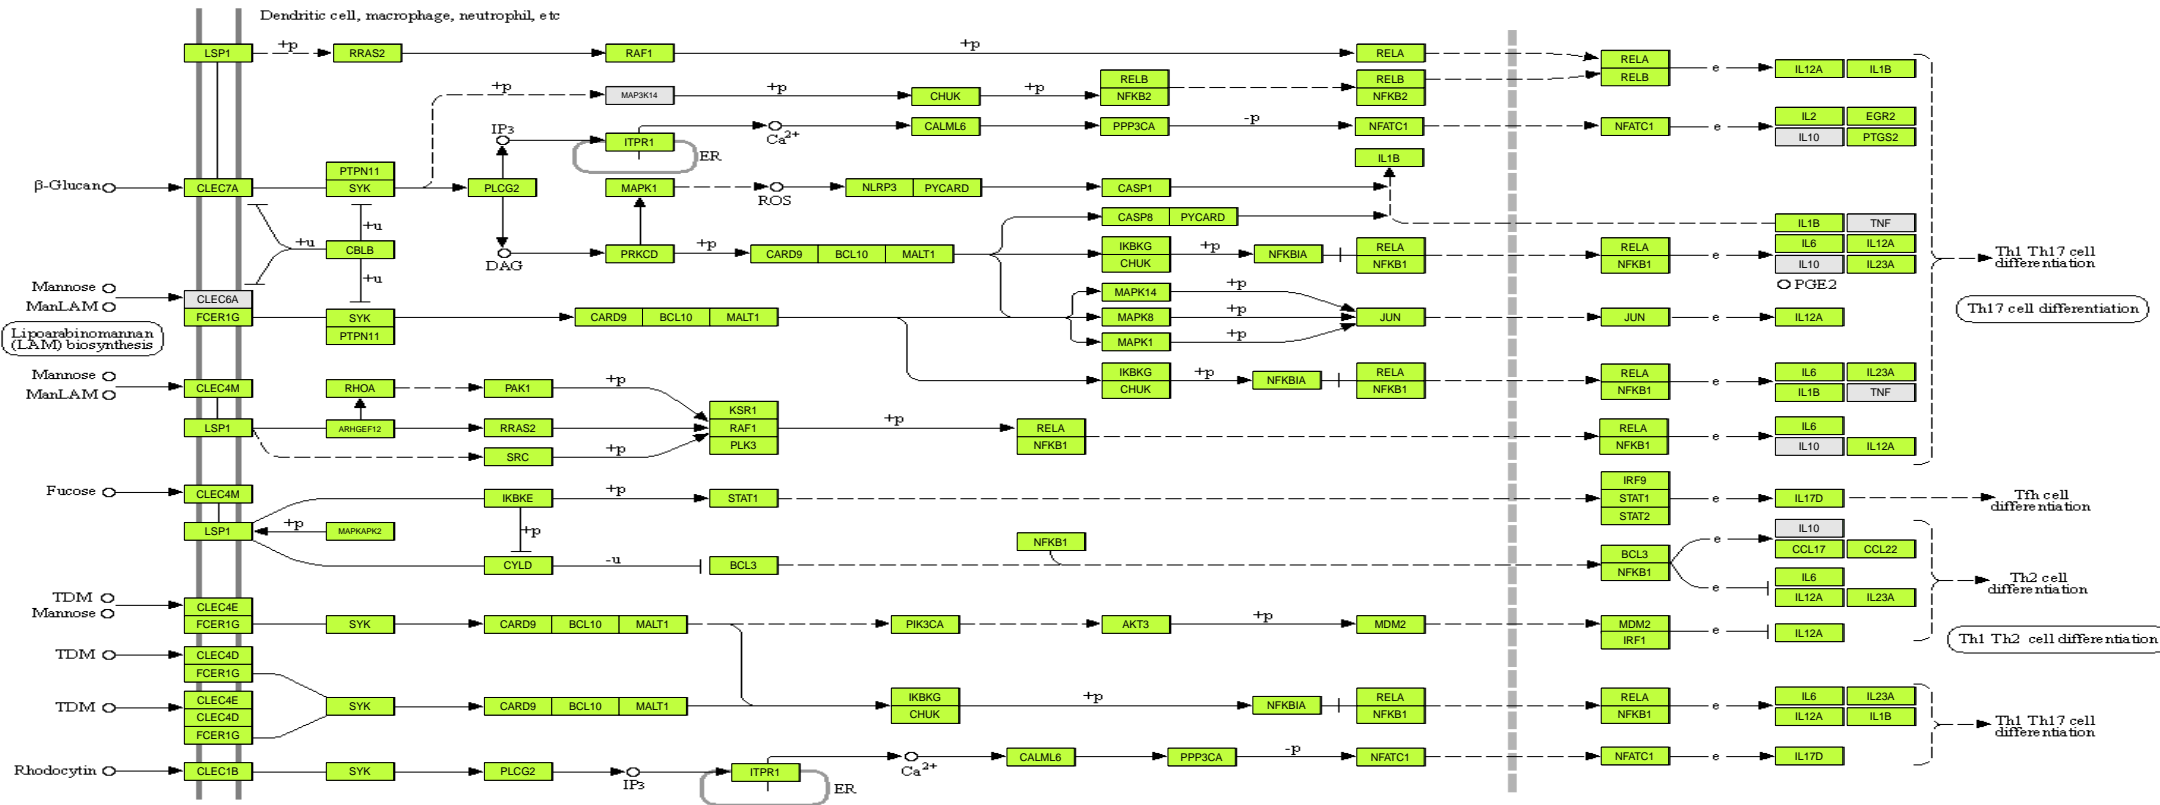

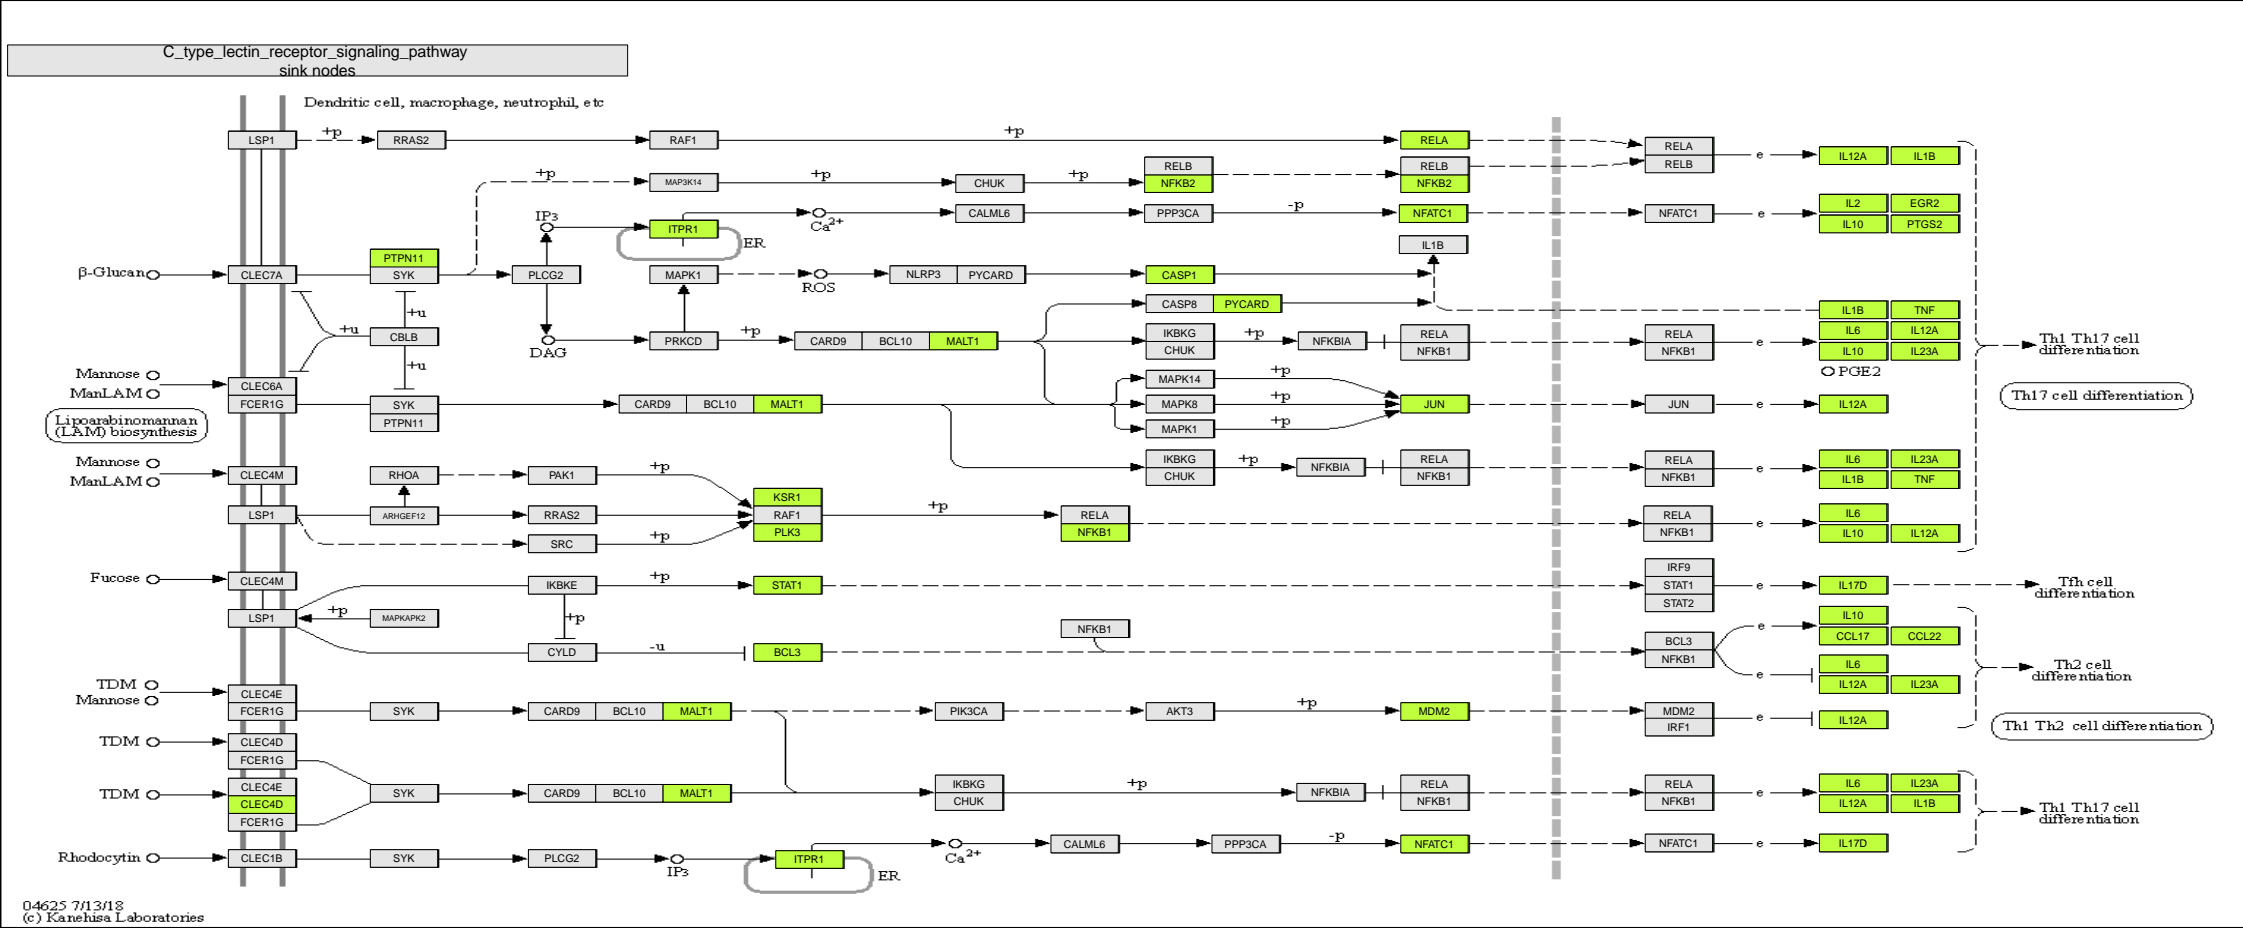

# C\_type\_lectin\_receptor\_signaling\_pathway Newborn

Dendritic cell, macrophage, neutrophil, etc

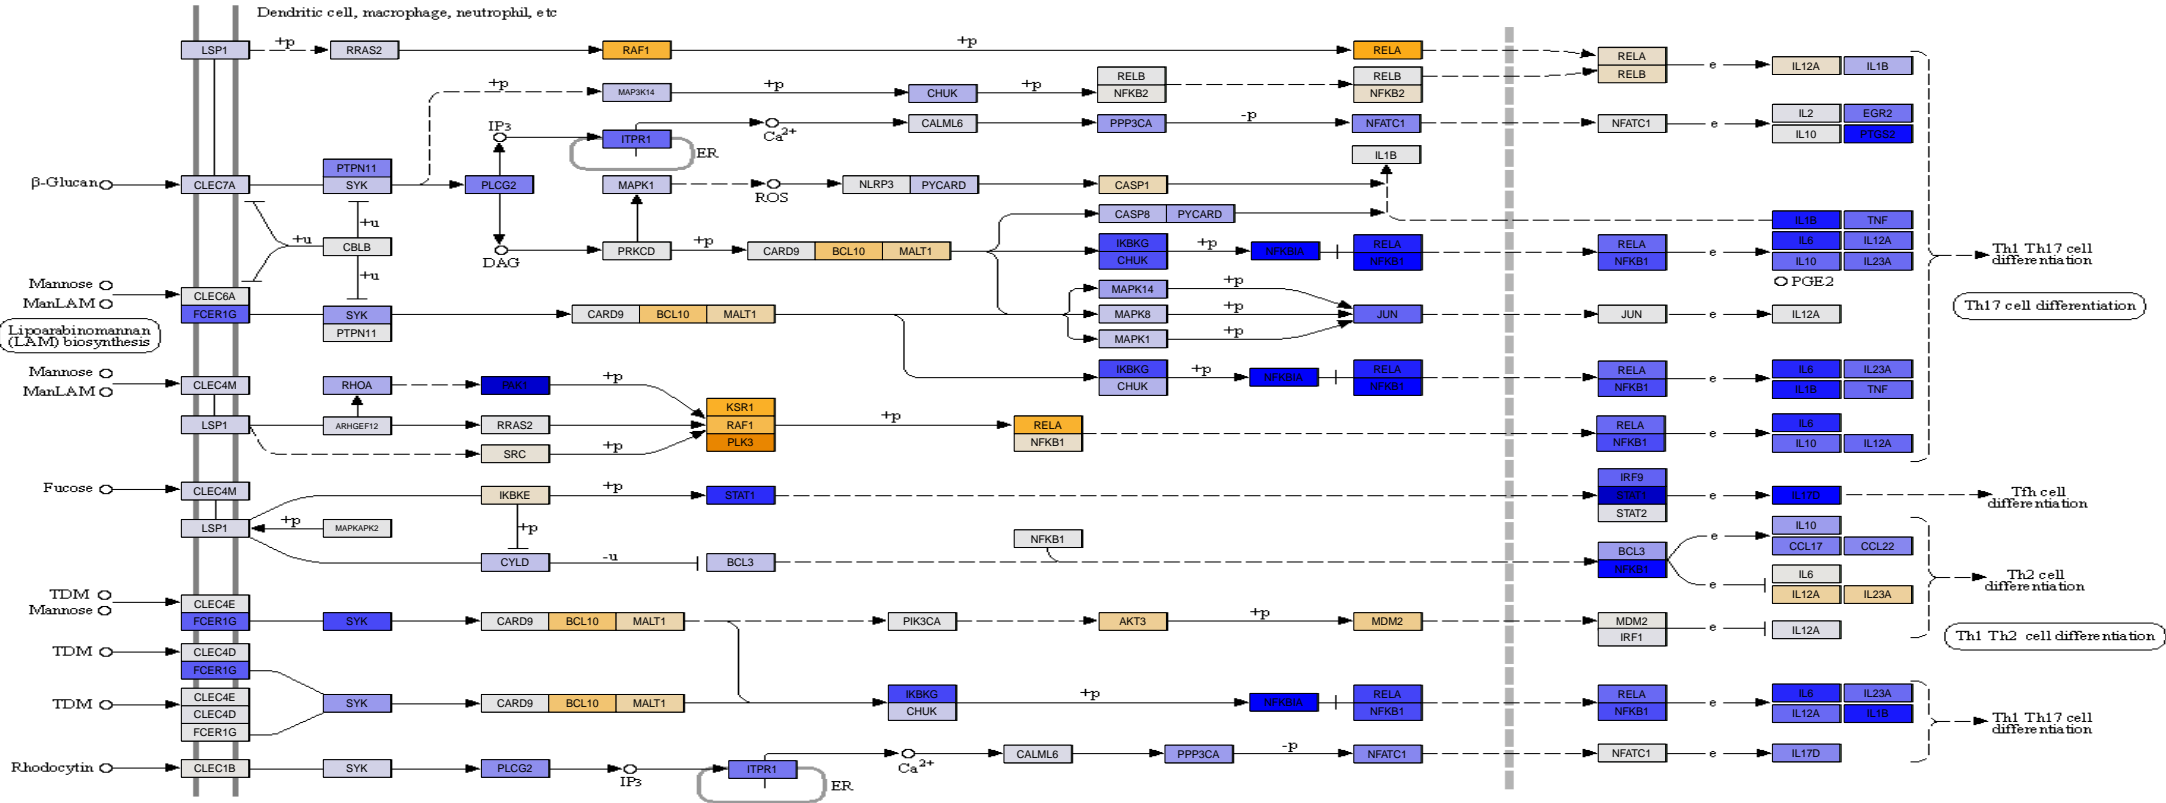

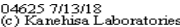

# C\_type\_lectin\_receptor\_signaling\_pathway Infant

Dendritic cell, macrophage, neutrophil, etc

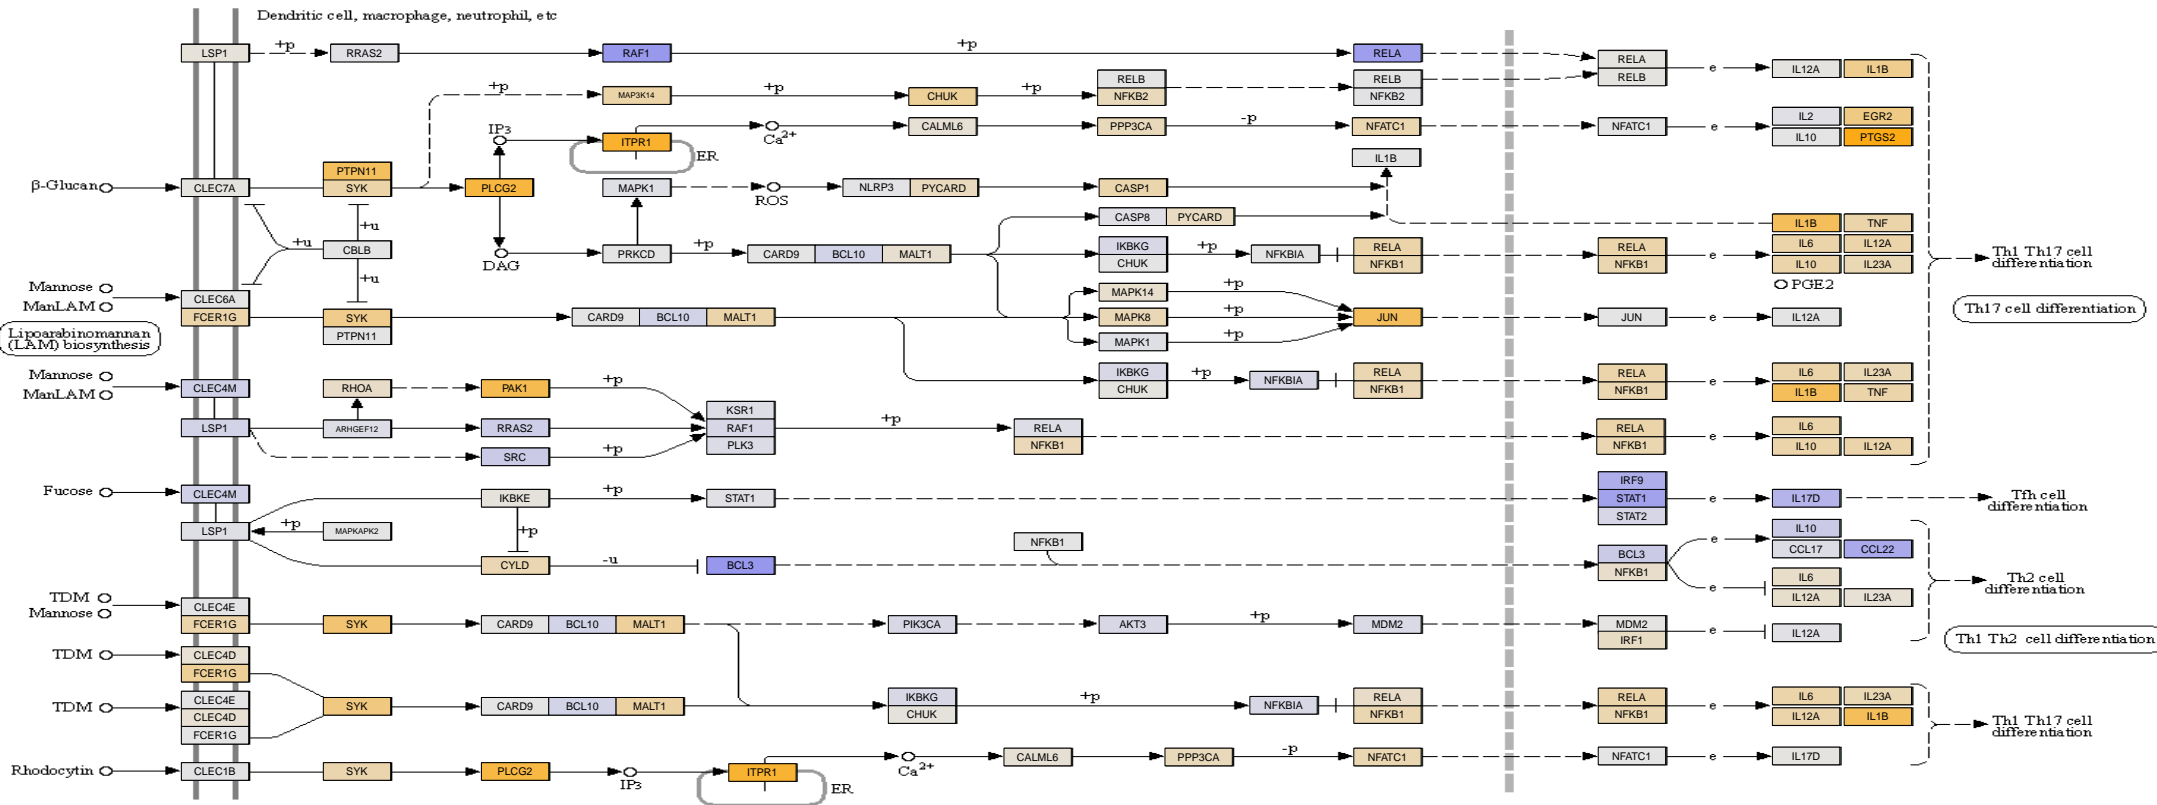

# C\_type\_lectin\_receptor\_signaling\_pathway

Teenager

Dendritic cell, macrophage, neutrophil, etc

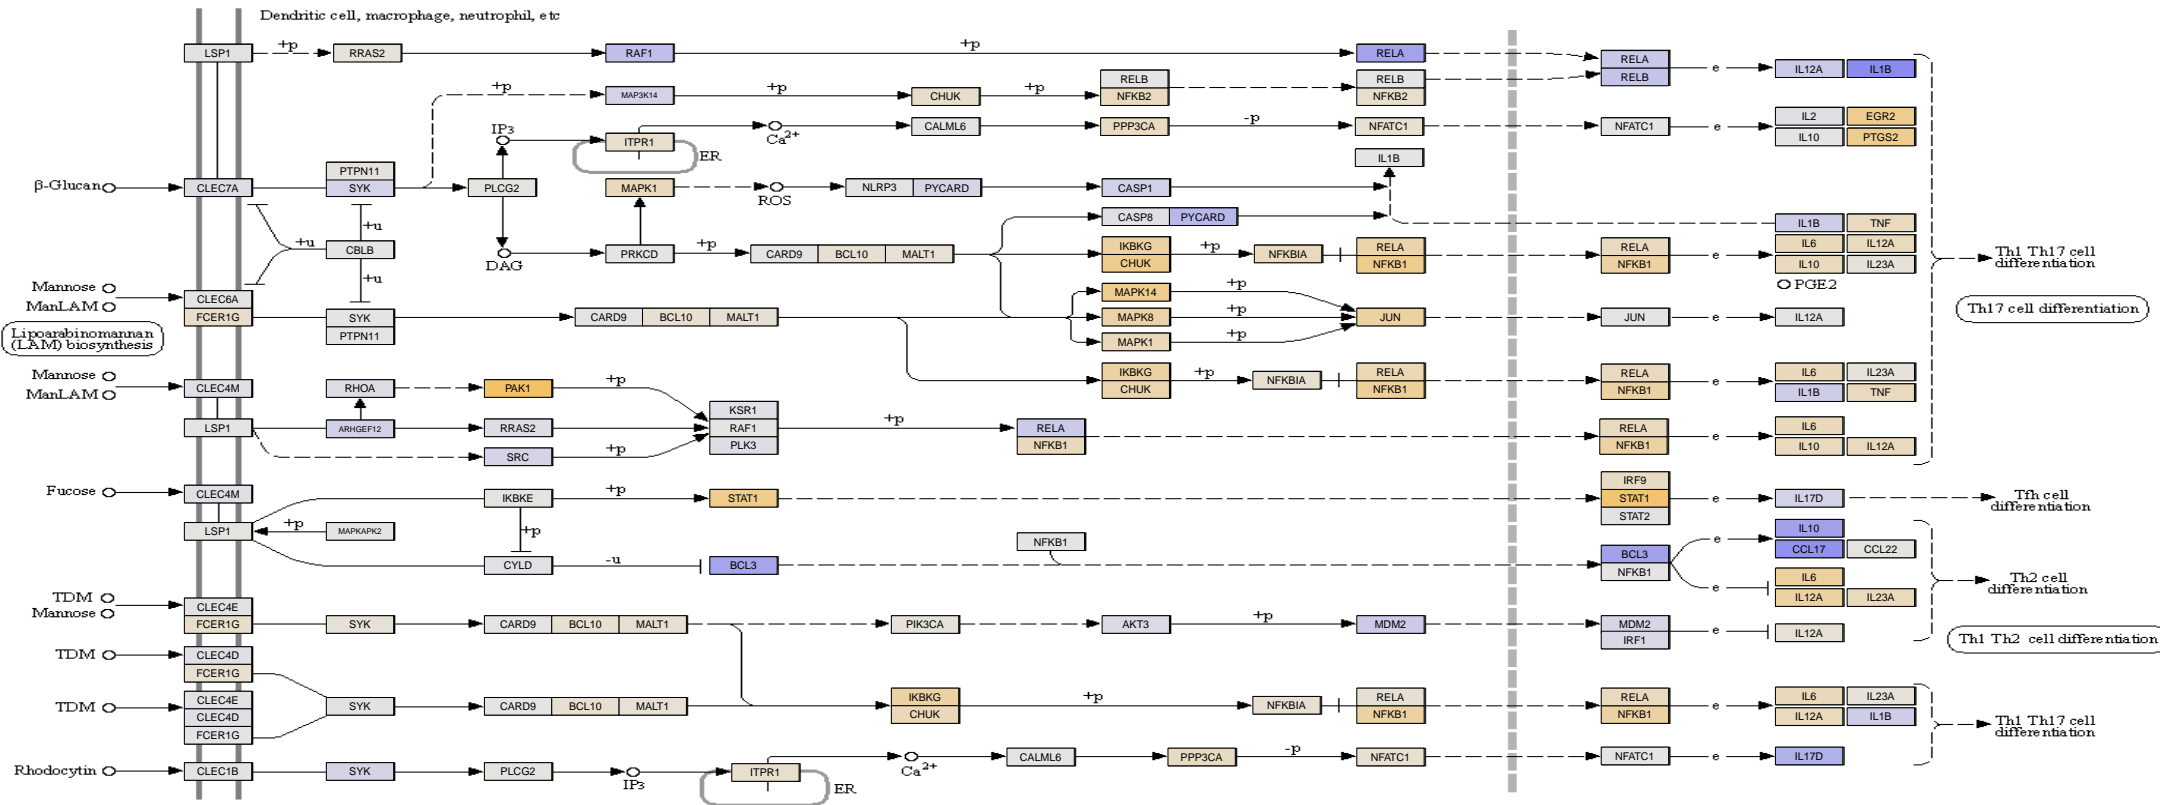

# C\_type\_lectin\_receptor\_signaling\_pathway Adult

Dendritic cell, macrophage, neutrophil, etc

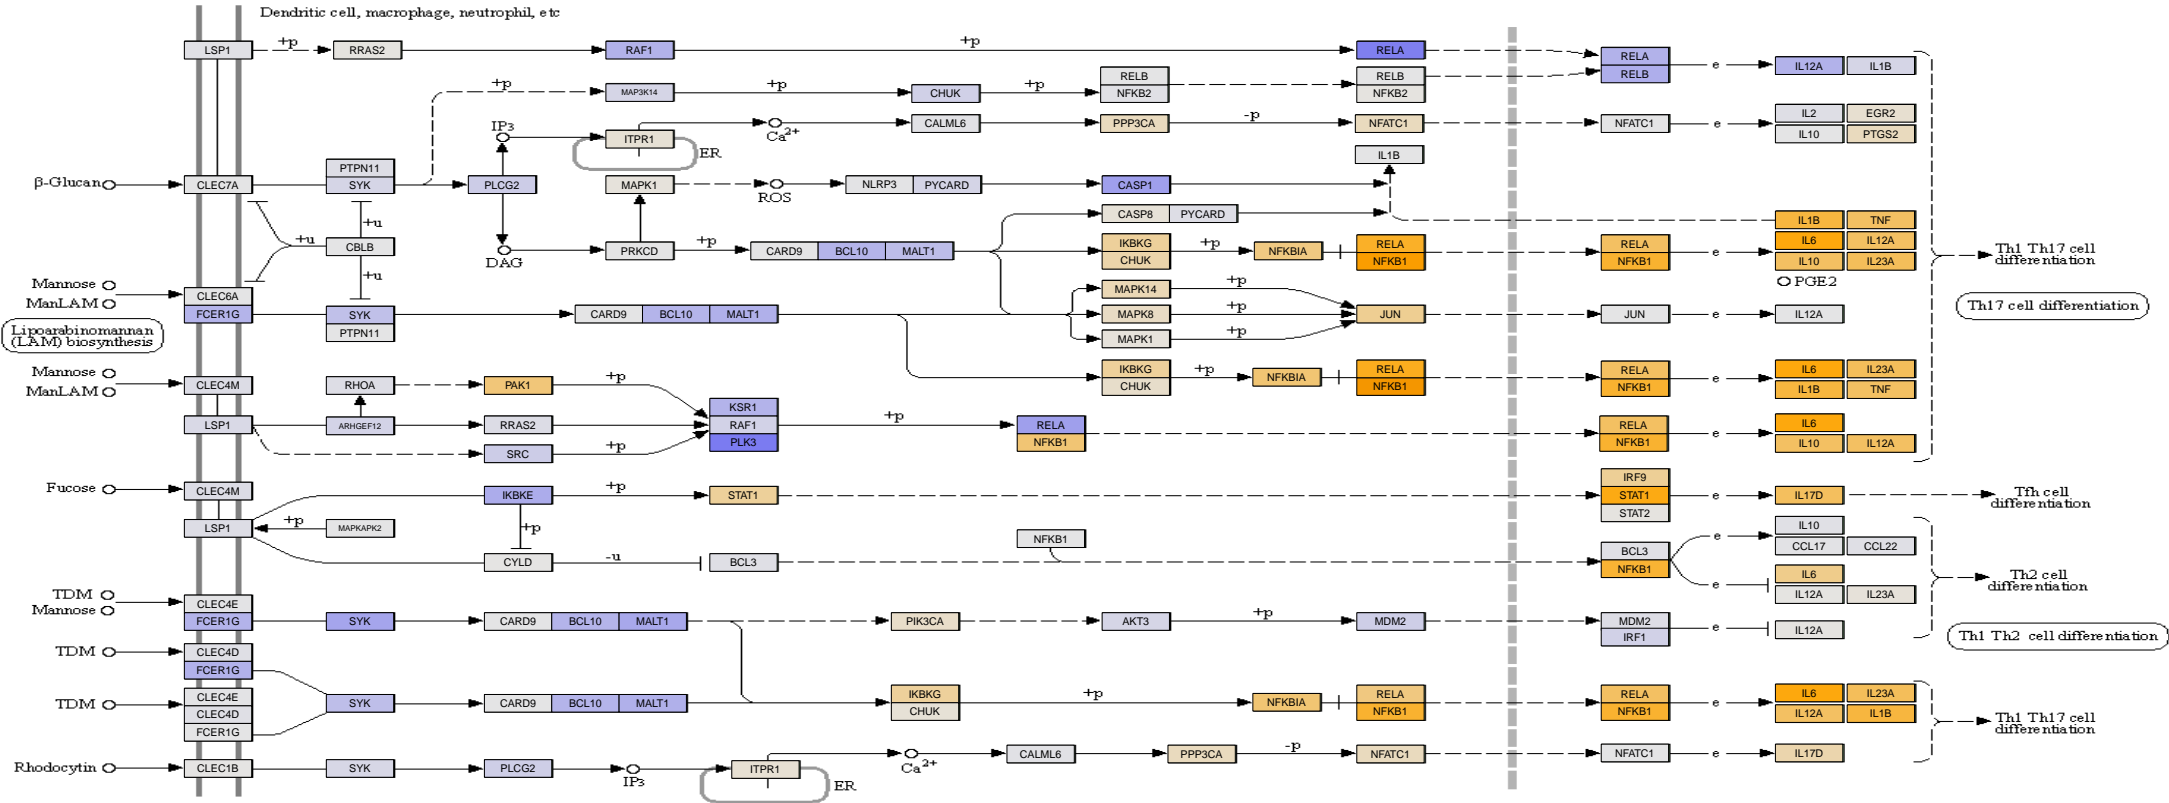



C\_type\_lectin\_receptor\_signaling\_pathway  
Late Adult

Dendritic cell, macrophage, neutrophil, etc

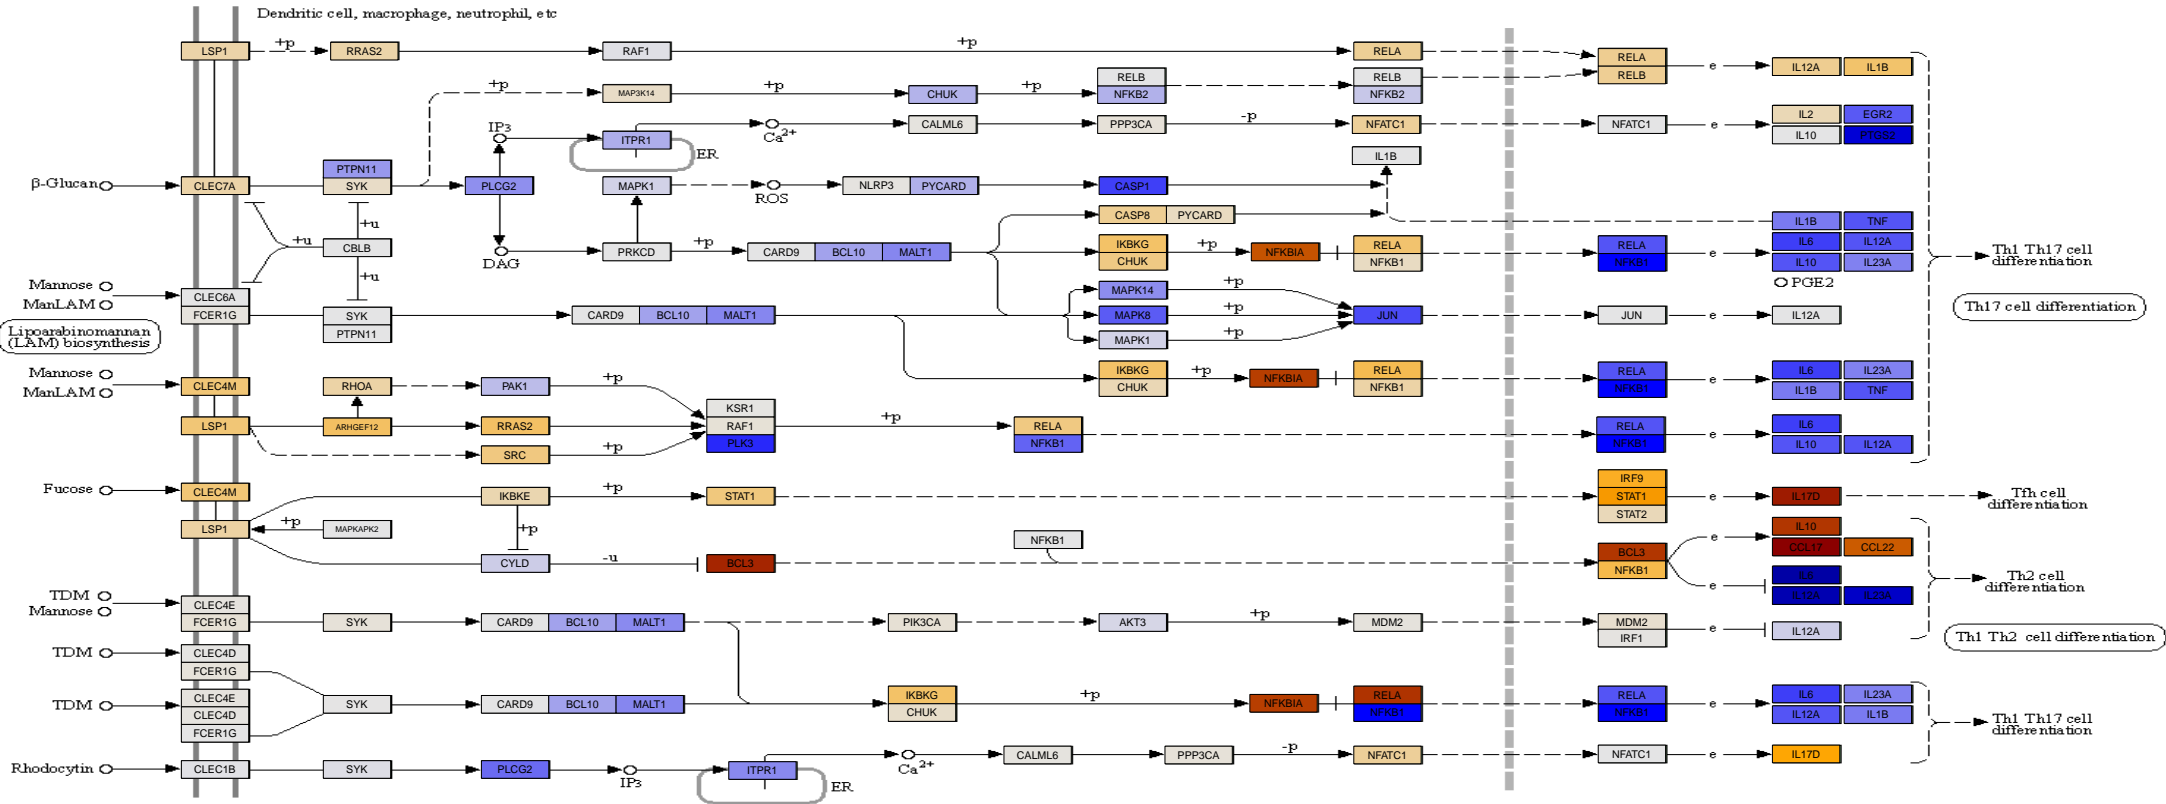

Supplement: s1 [file s1]
