# Supplementary material for: The Transcriptome and Methylome of the Developing and Aging Brain and Their Relations to Gliomas and Psychological Disorders
Source: MDPI journal article supplement (doi:10.3390/cells11030362), 2022-01-21

Insulin signaling pathway

all genes

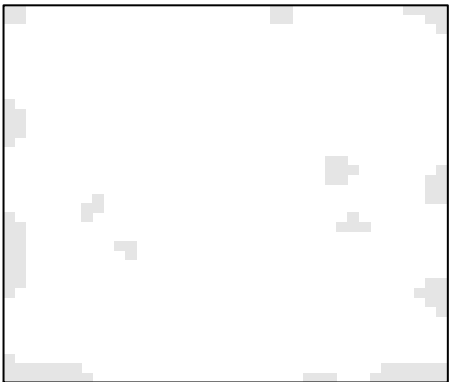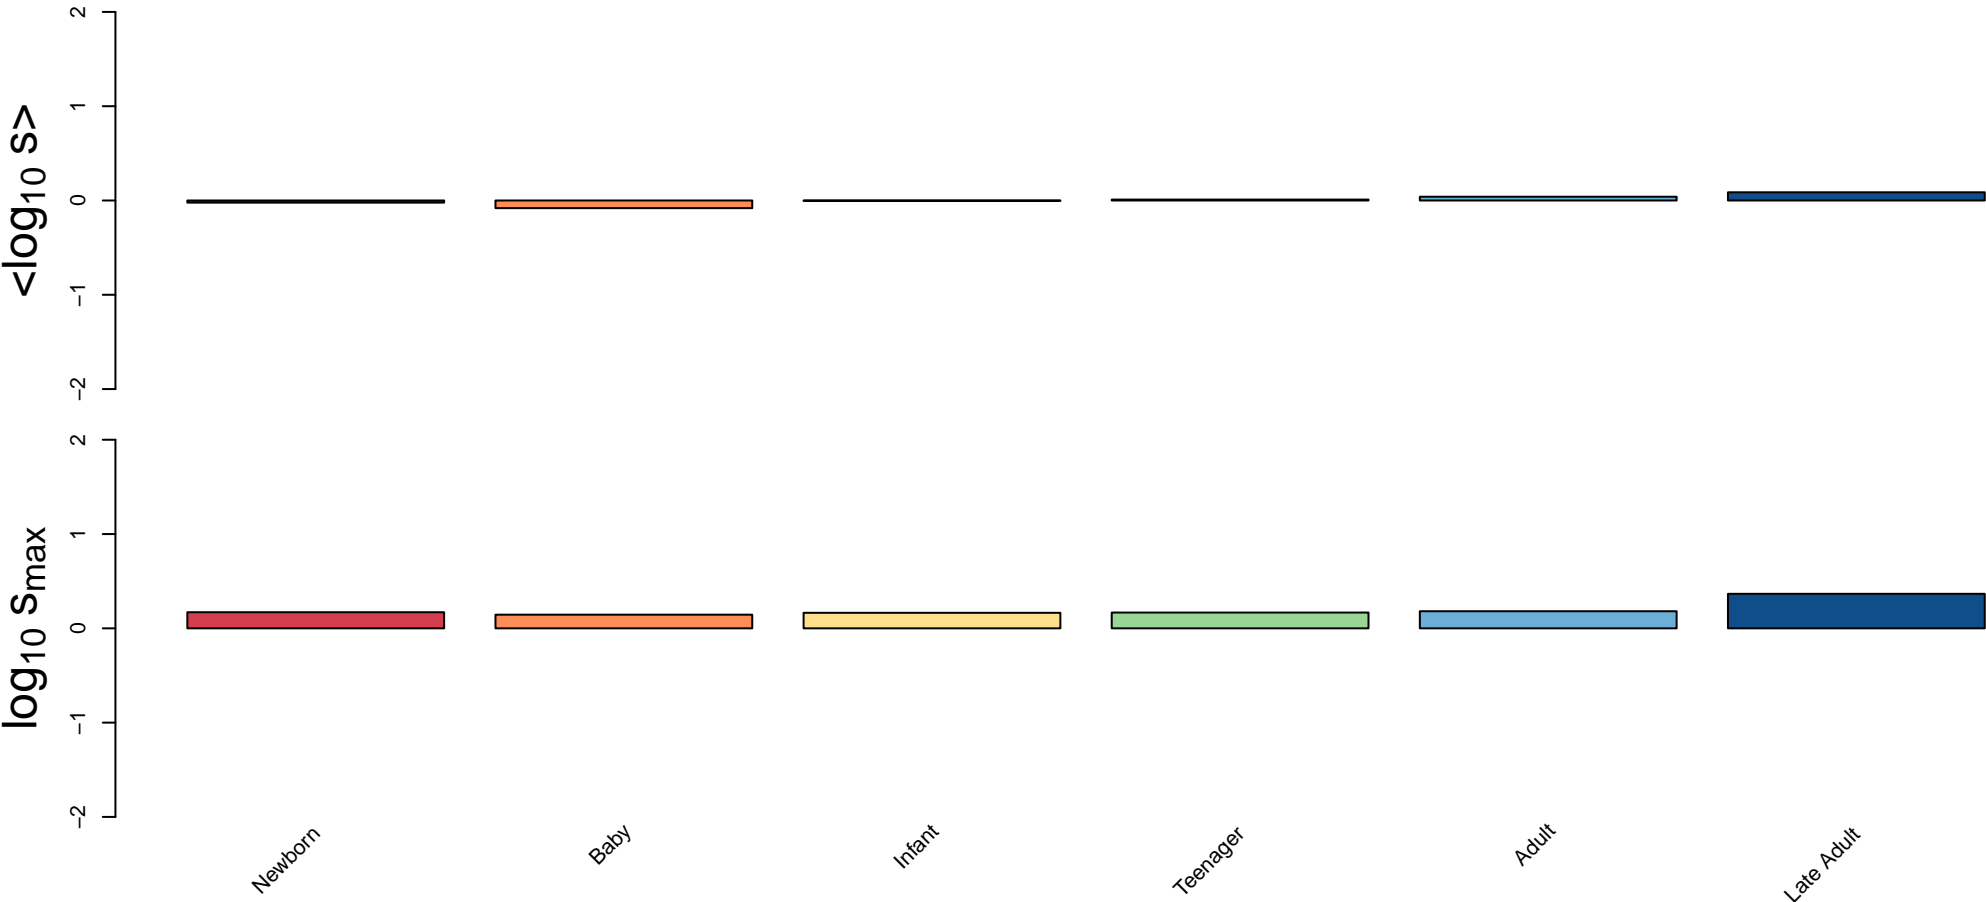

Insulin\_signaling\_pathway  
genes with data

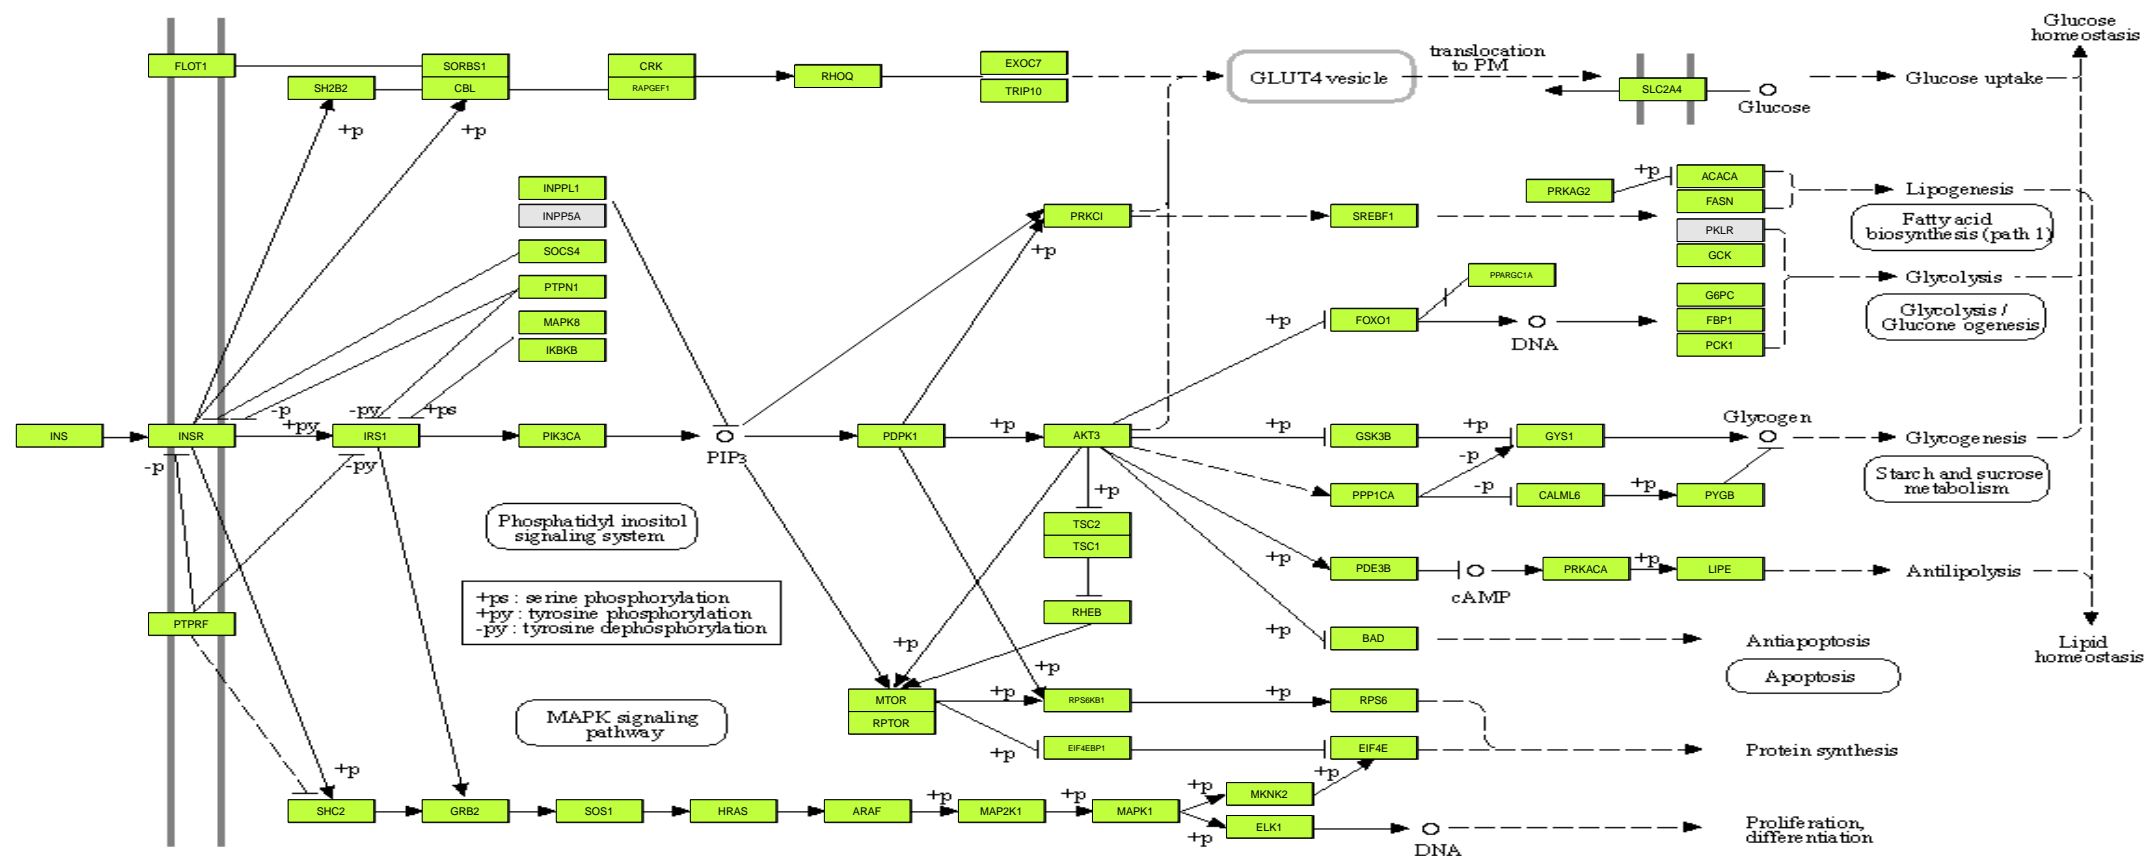



Insulin\_signaling\_pathway  
Newborn

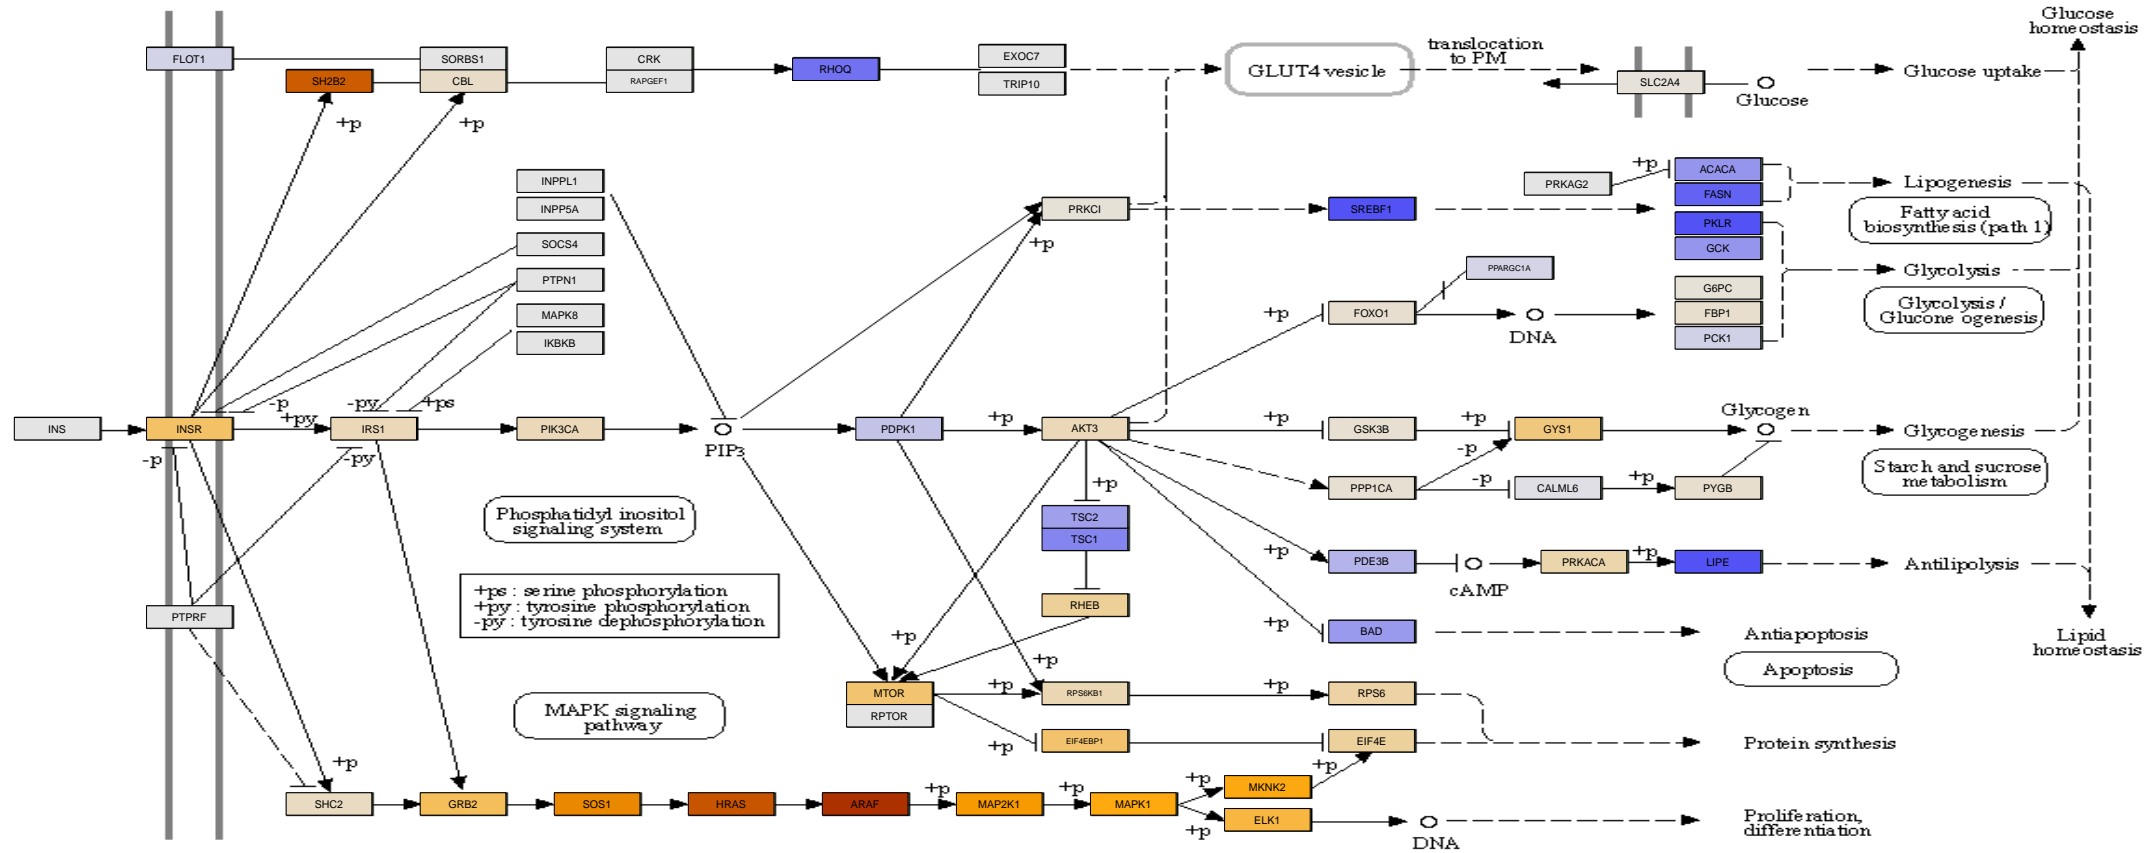



Insulin\_signaling\_pathway  
Infant

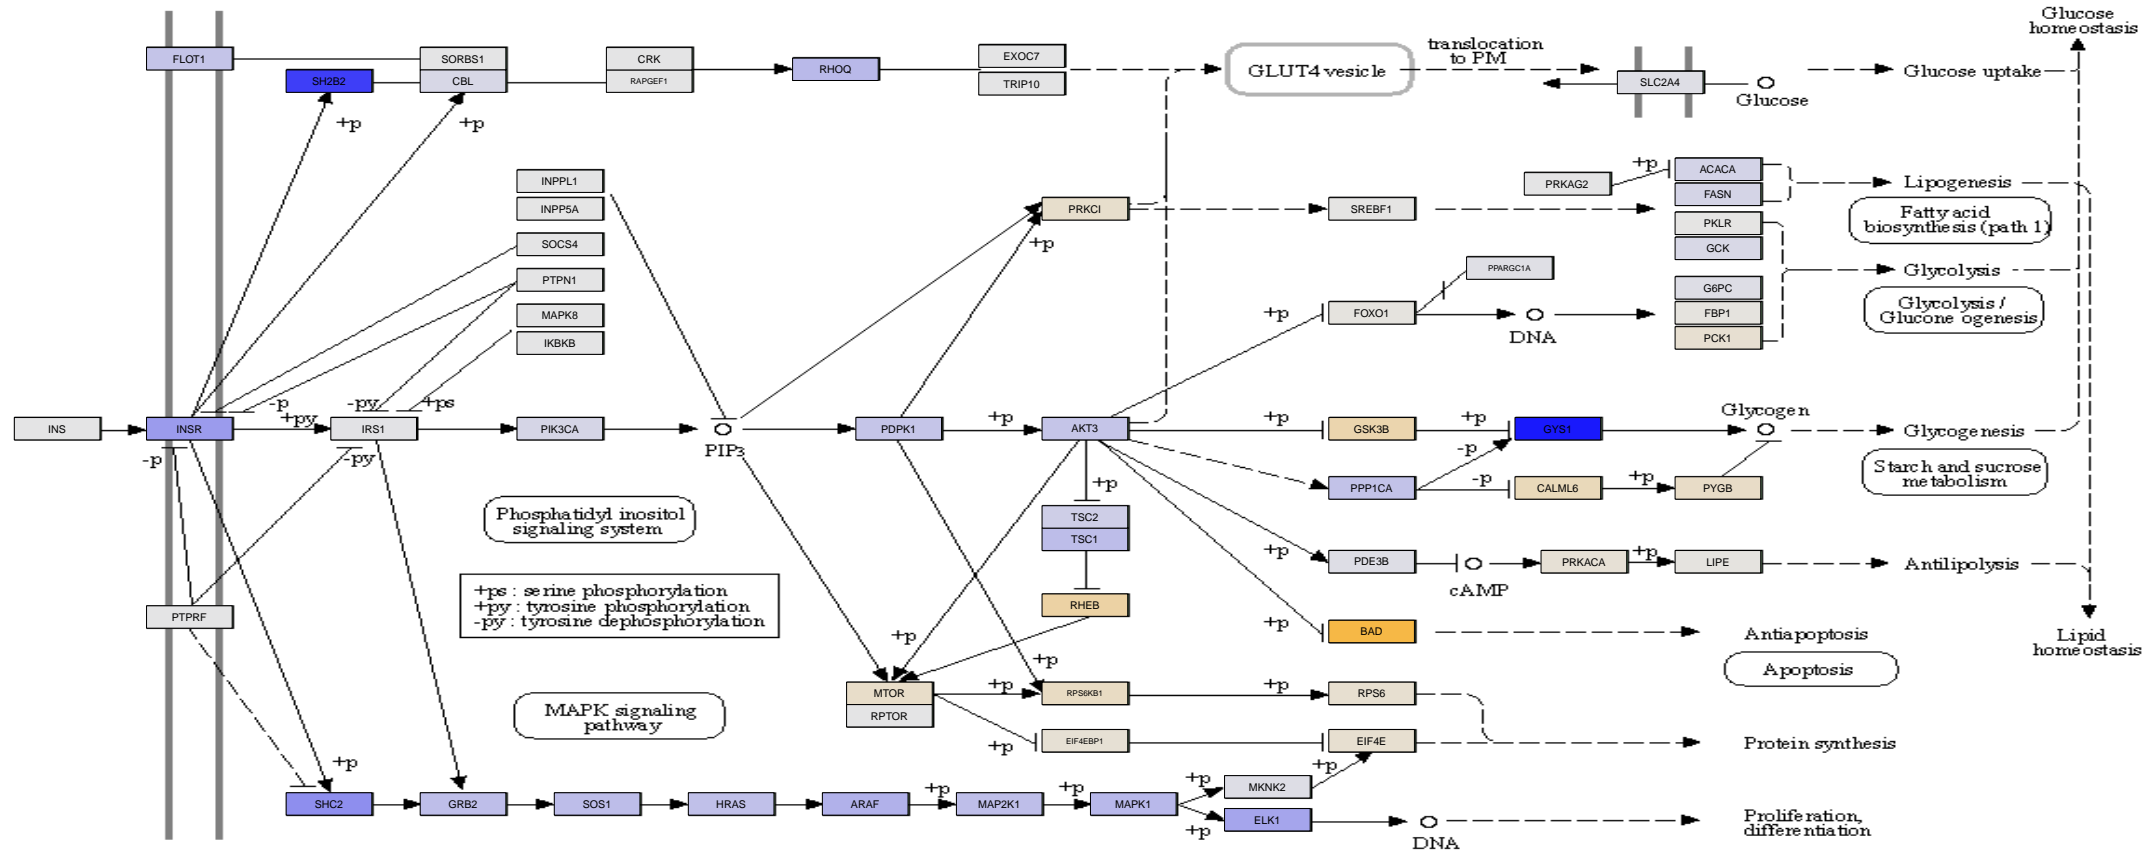

Insulin\_signaling\_pathway  
Teenager

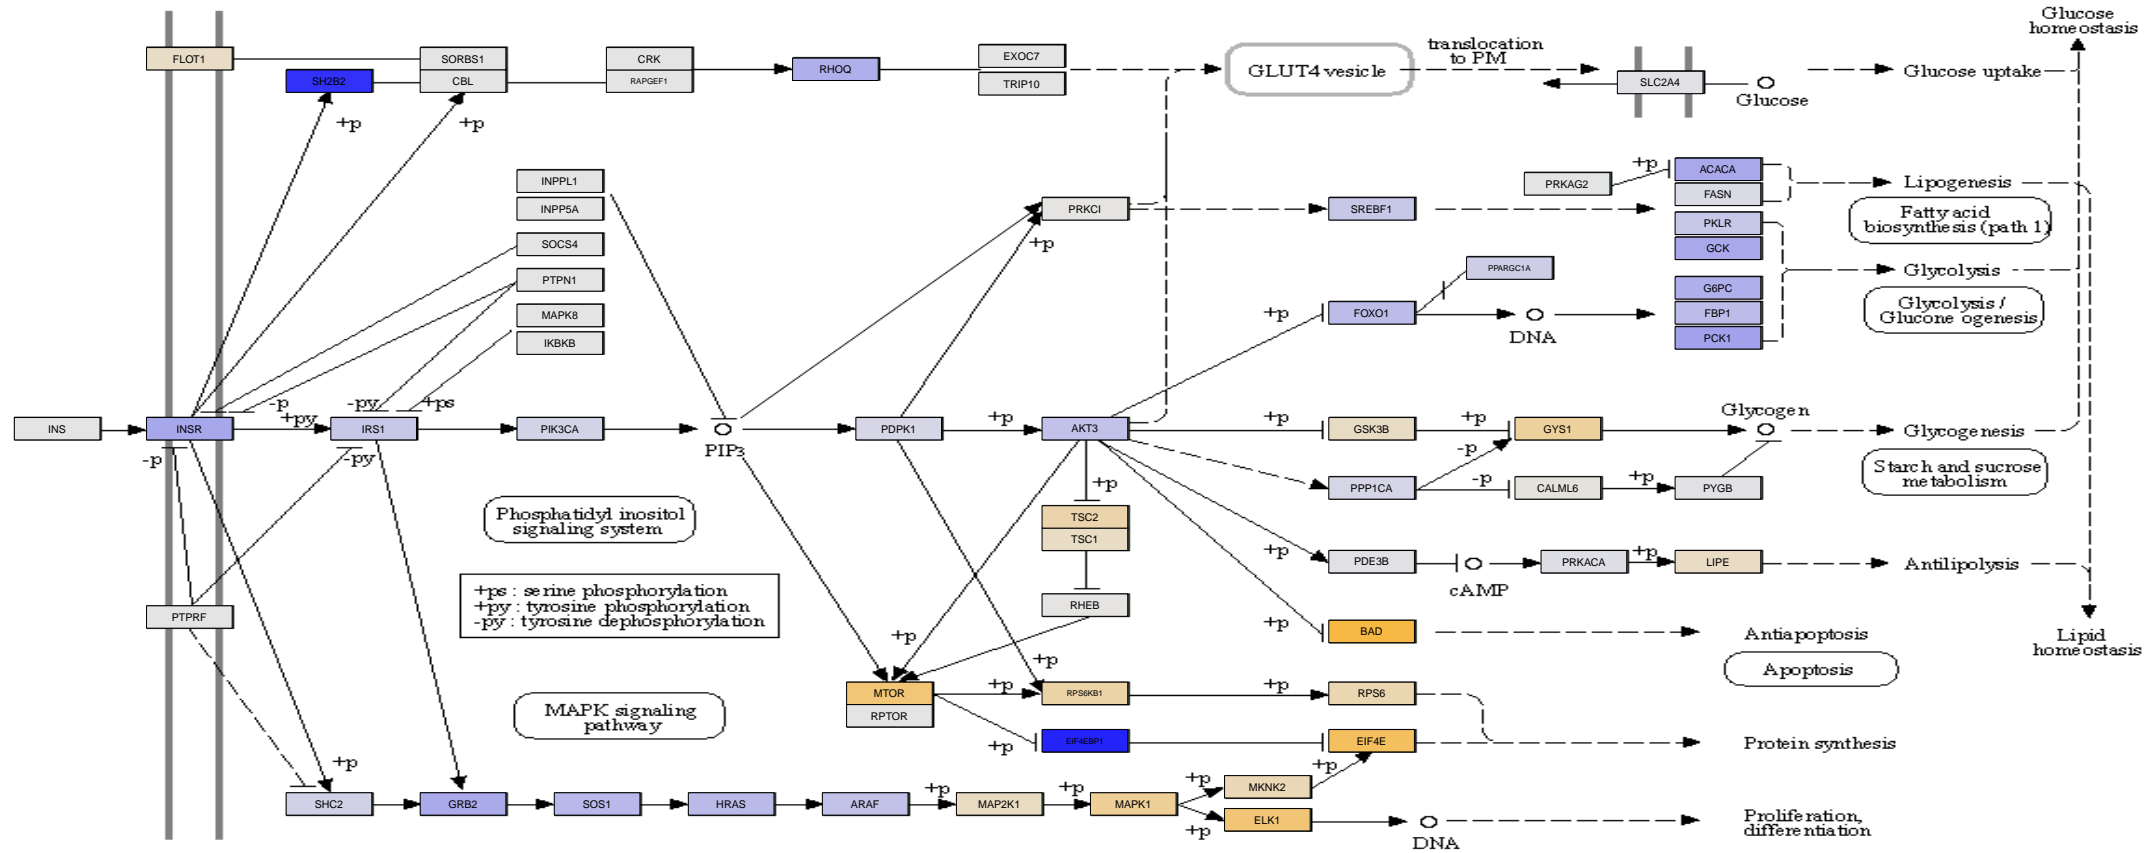

Insulin\_signaling\_pathway  
Adult

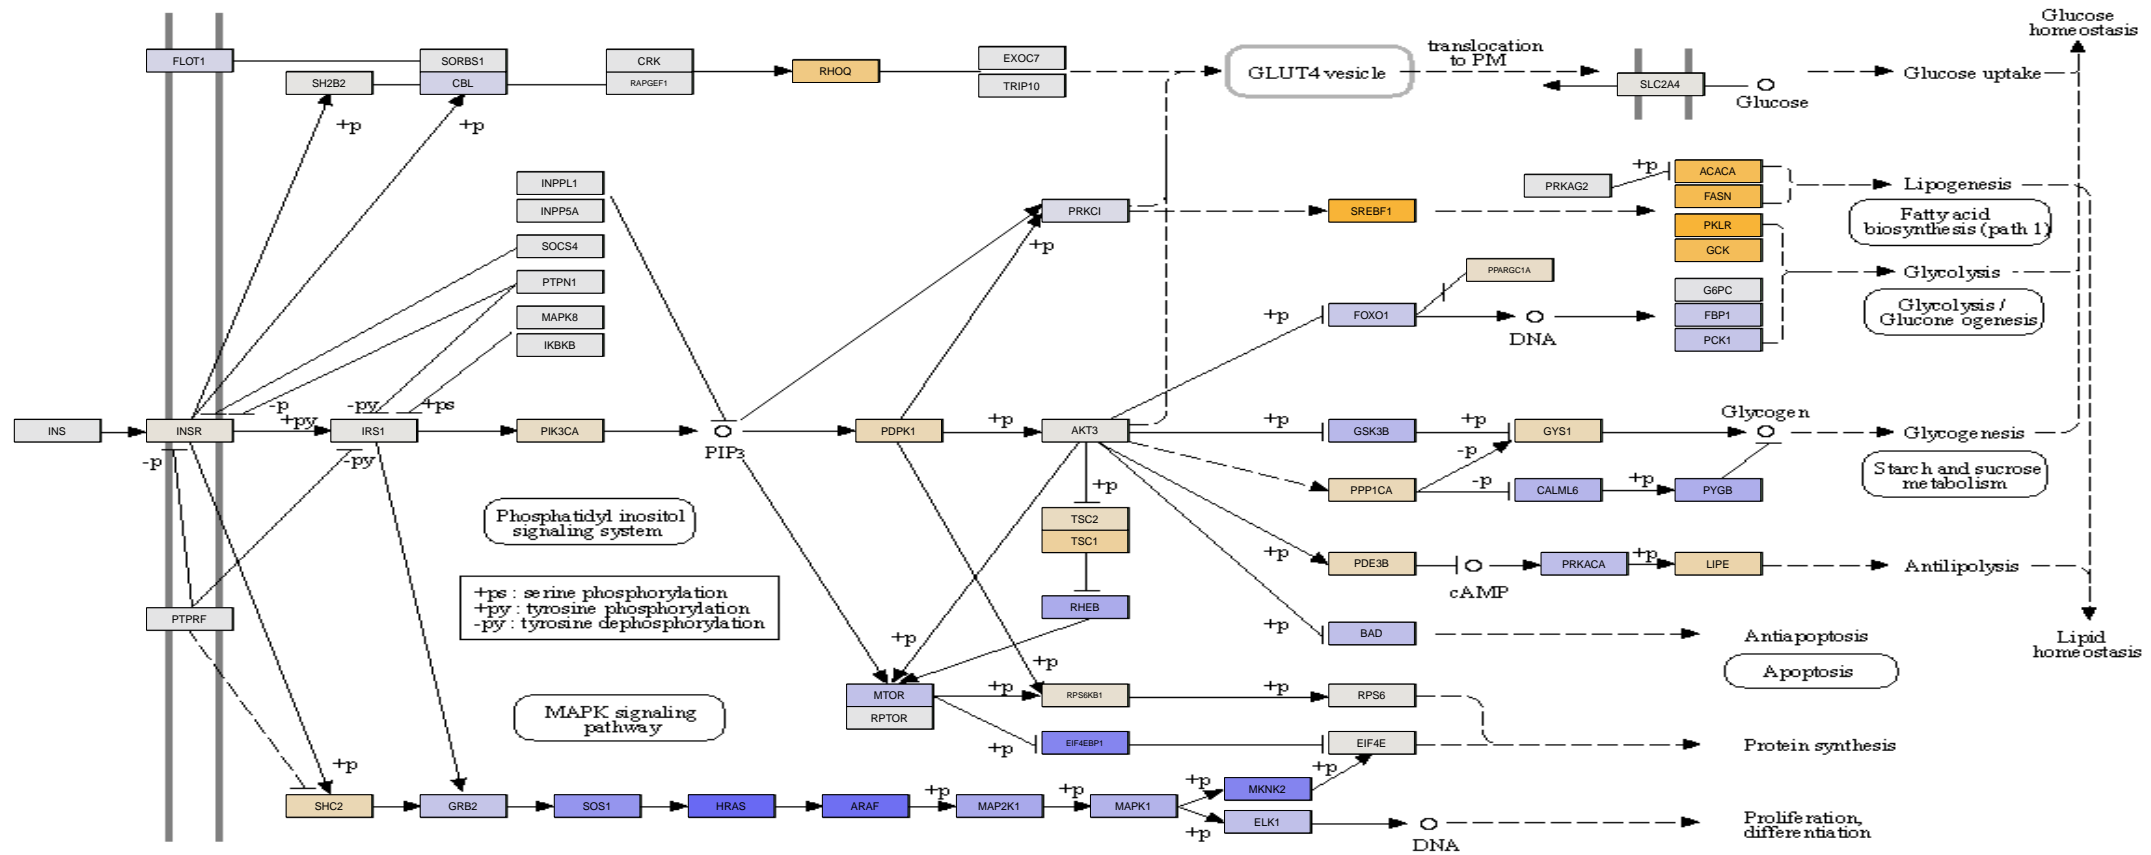



Insulin\_signaling\_pathway  
Late Adult

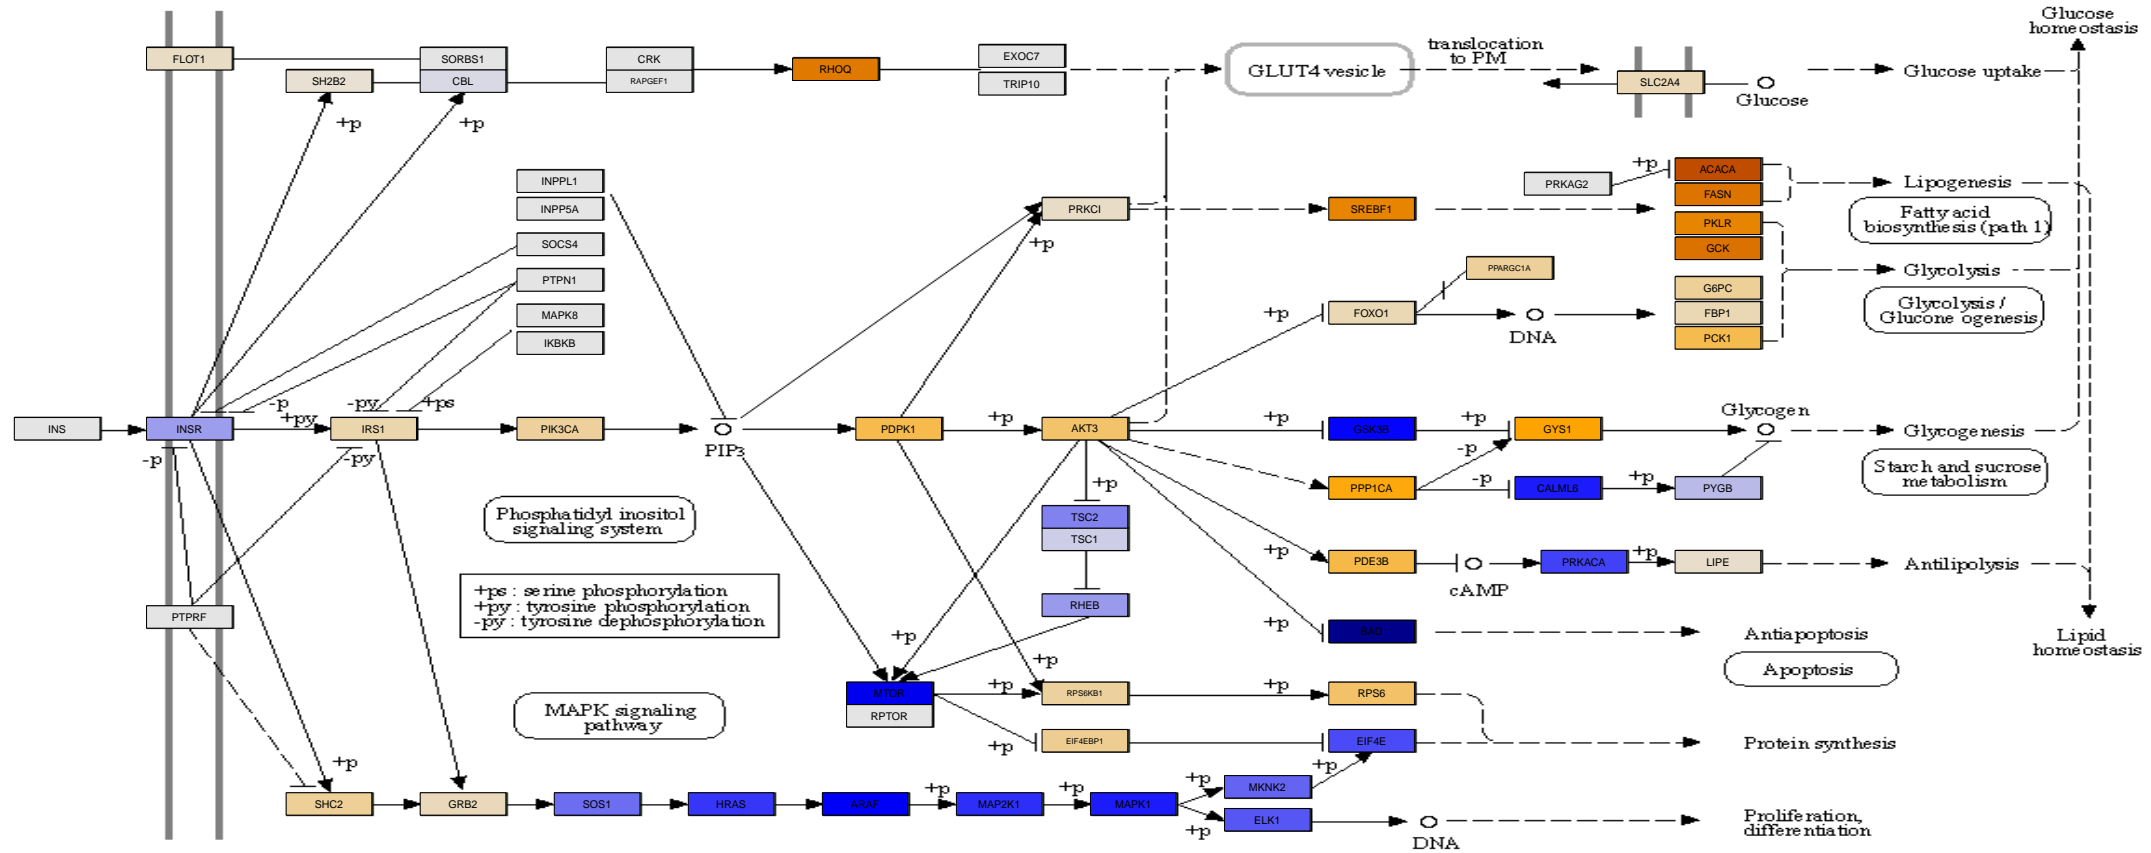

Supplement: s1 [file s1]
