# Supplementary material for: The Transcriptome and Methylome of the Developing and Aging Brain and Their Relations to Gliomas and Psychological Disorders
Source: MDPI journal article supplement (doi:10.3390/cells11030362), 2022-01-21

Phosphatidylinositol signaling system

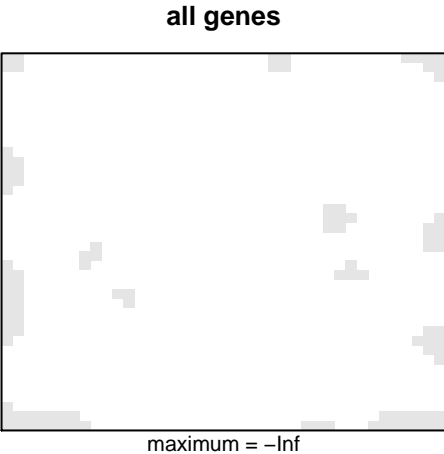

Phosphatidylinositol\_signaling\_system  
genes with data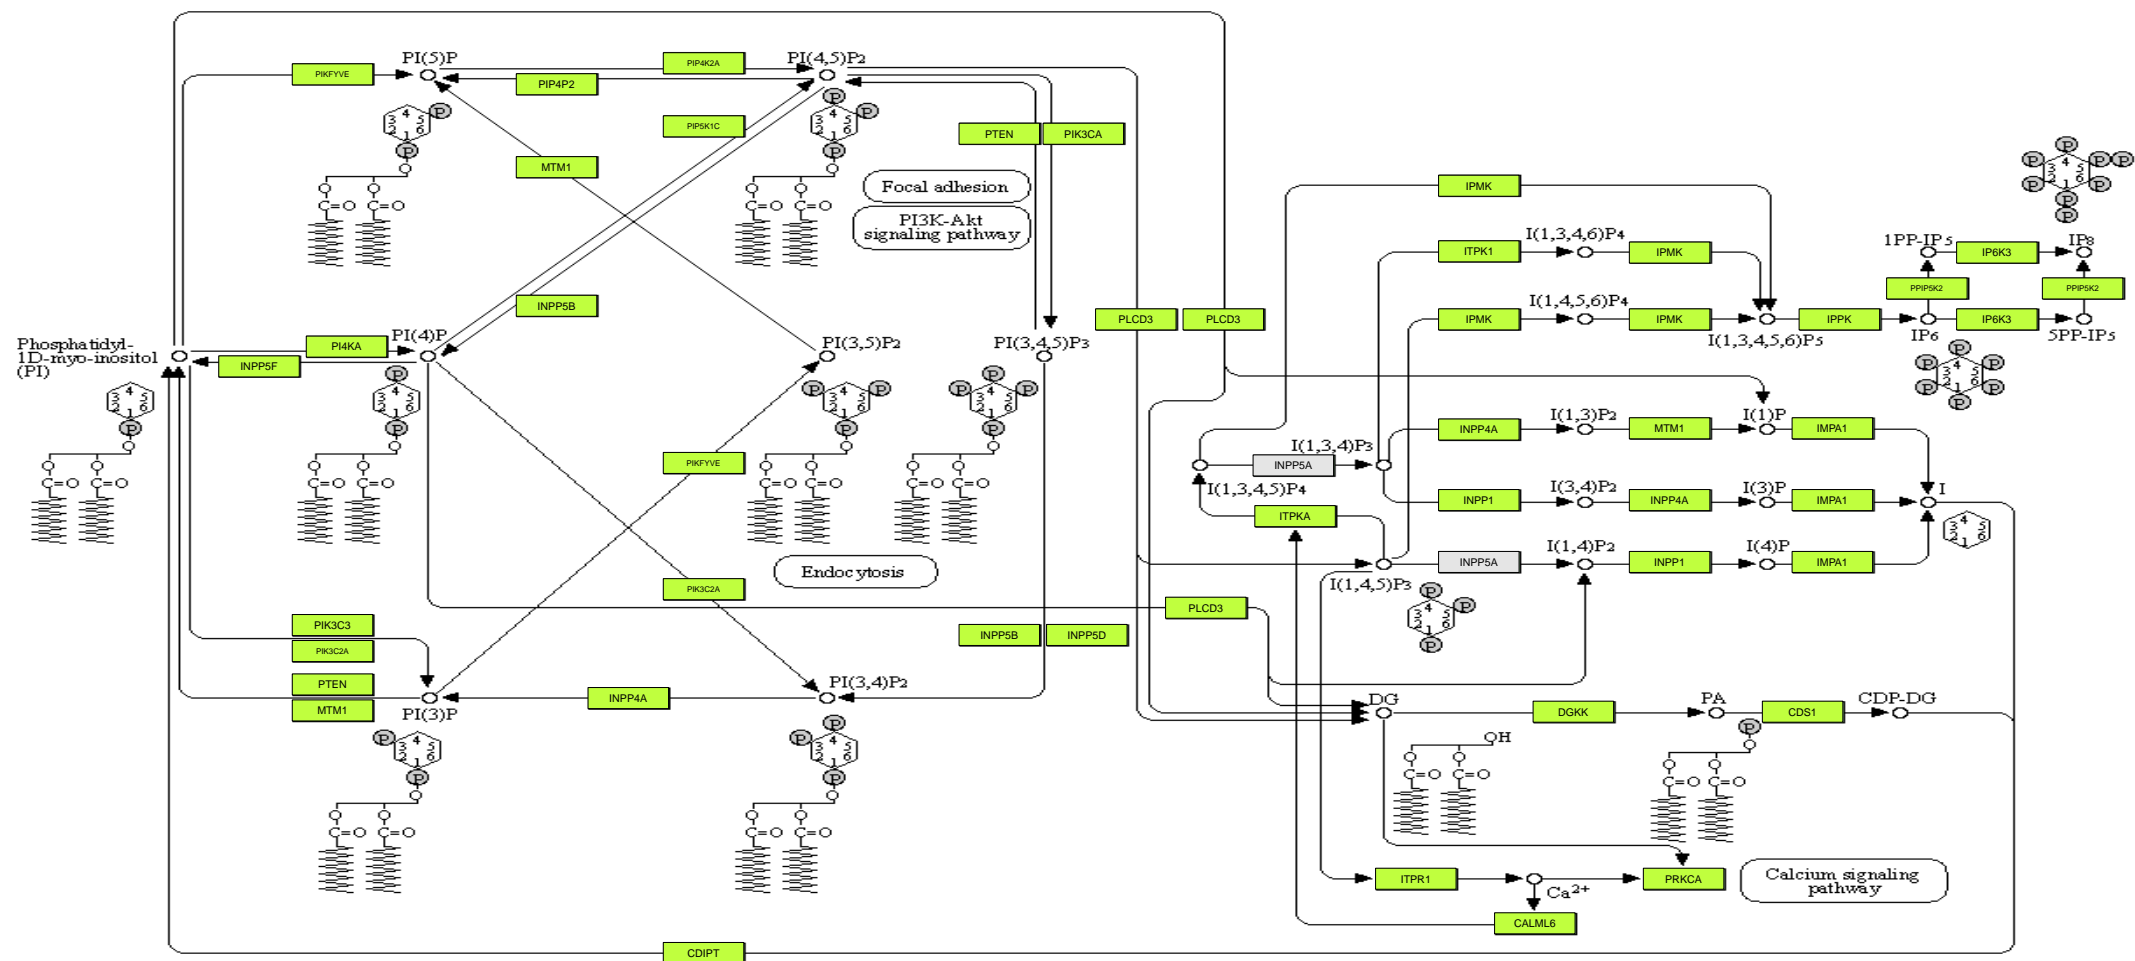









Phosphatidylinositol\_signaling\_system  
Teenager

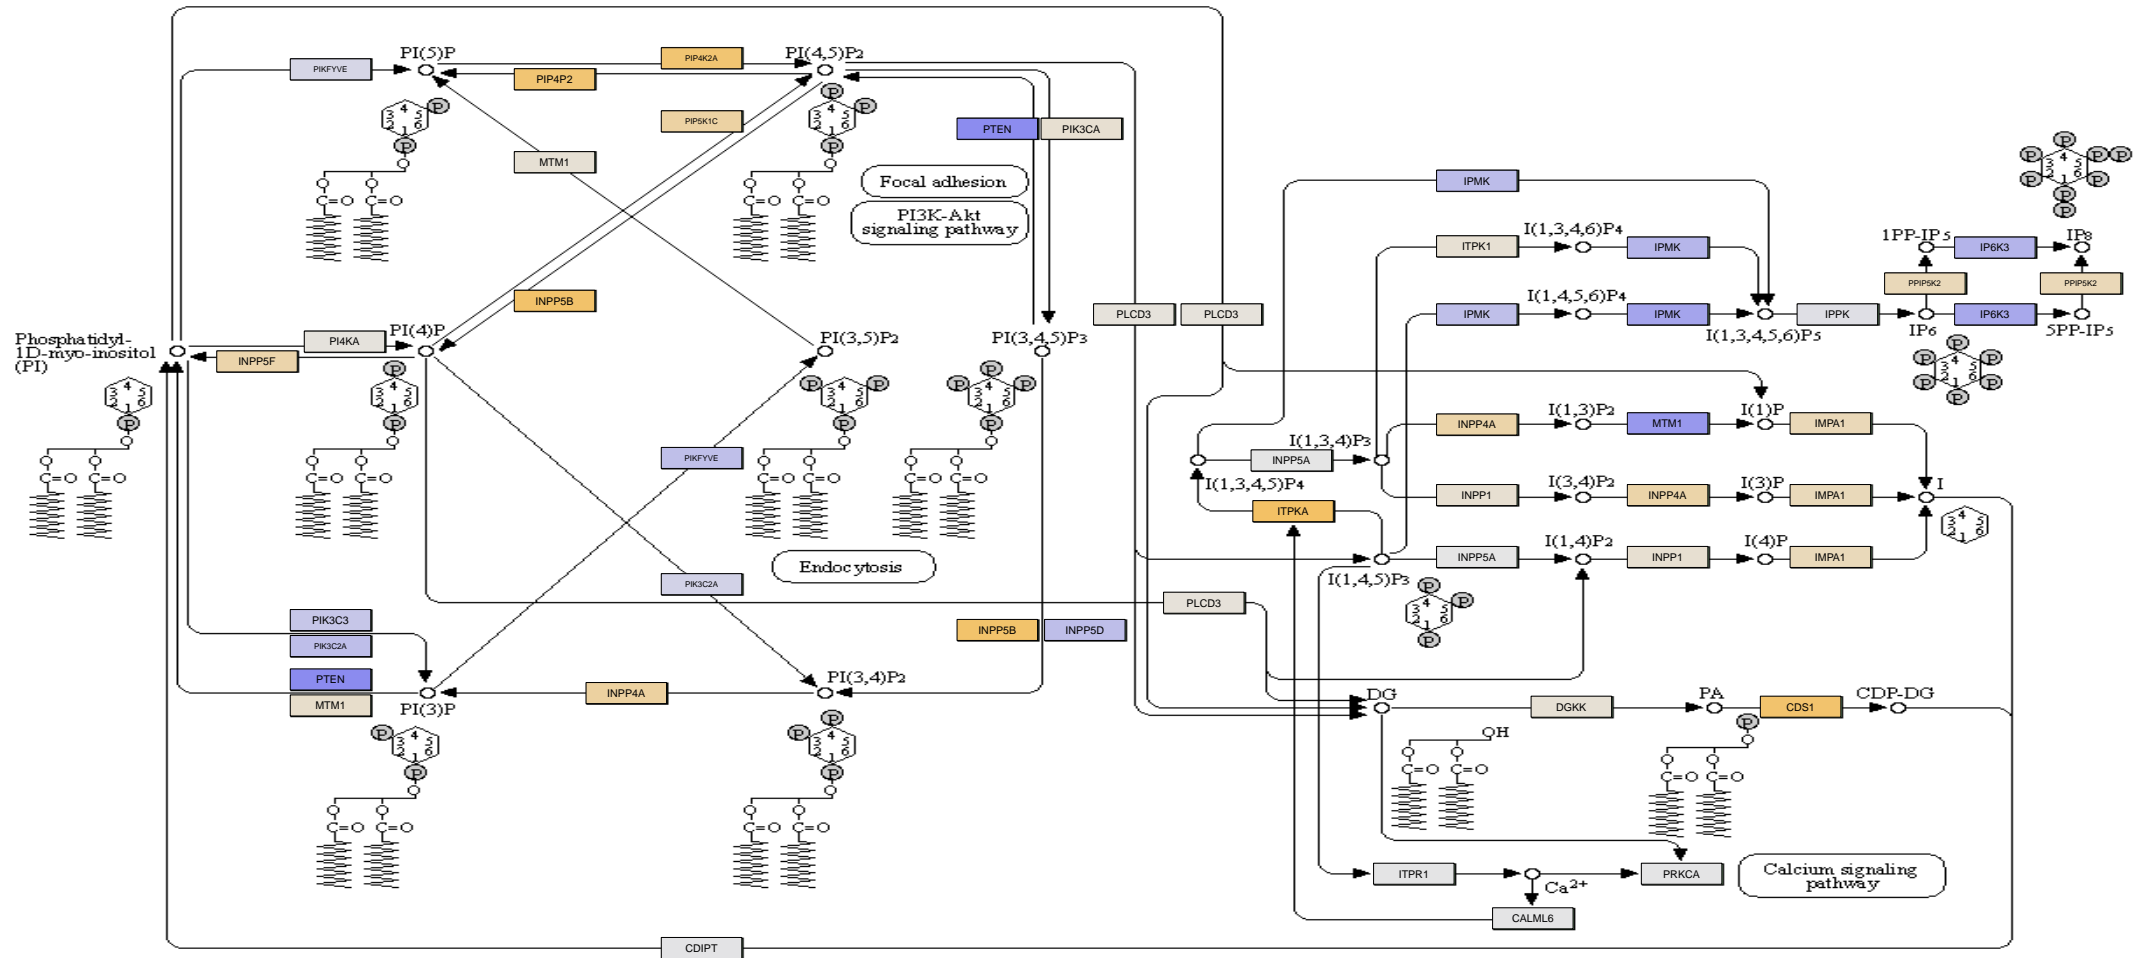

Phosphatidylinositol\_signaling\_system  
Adult

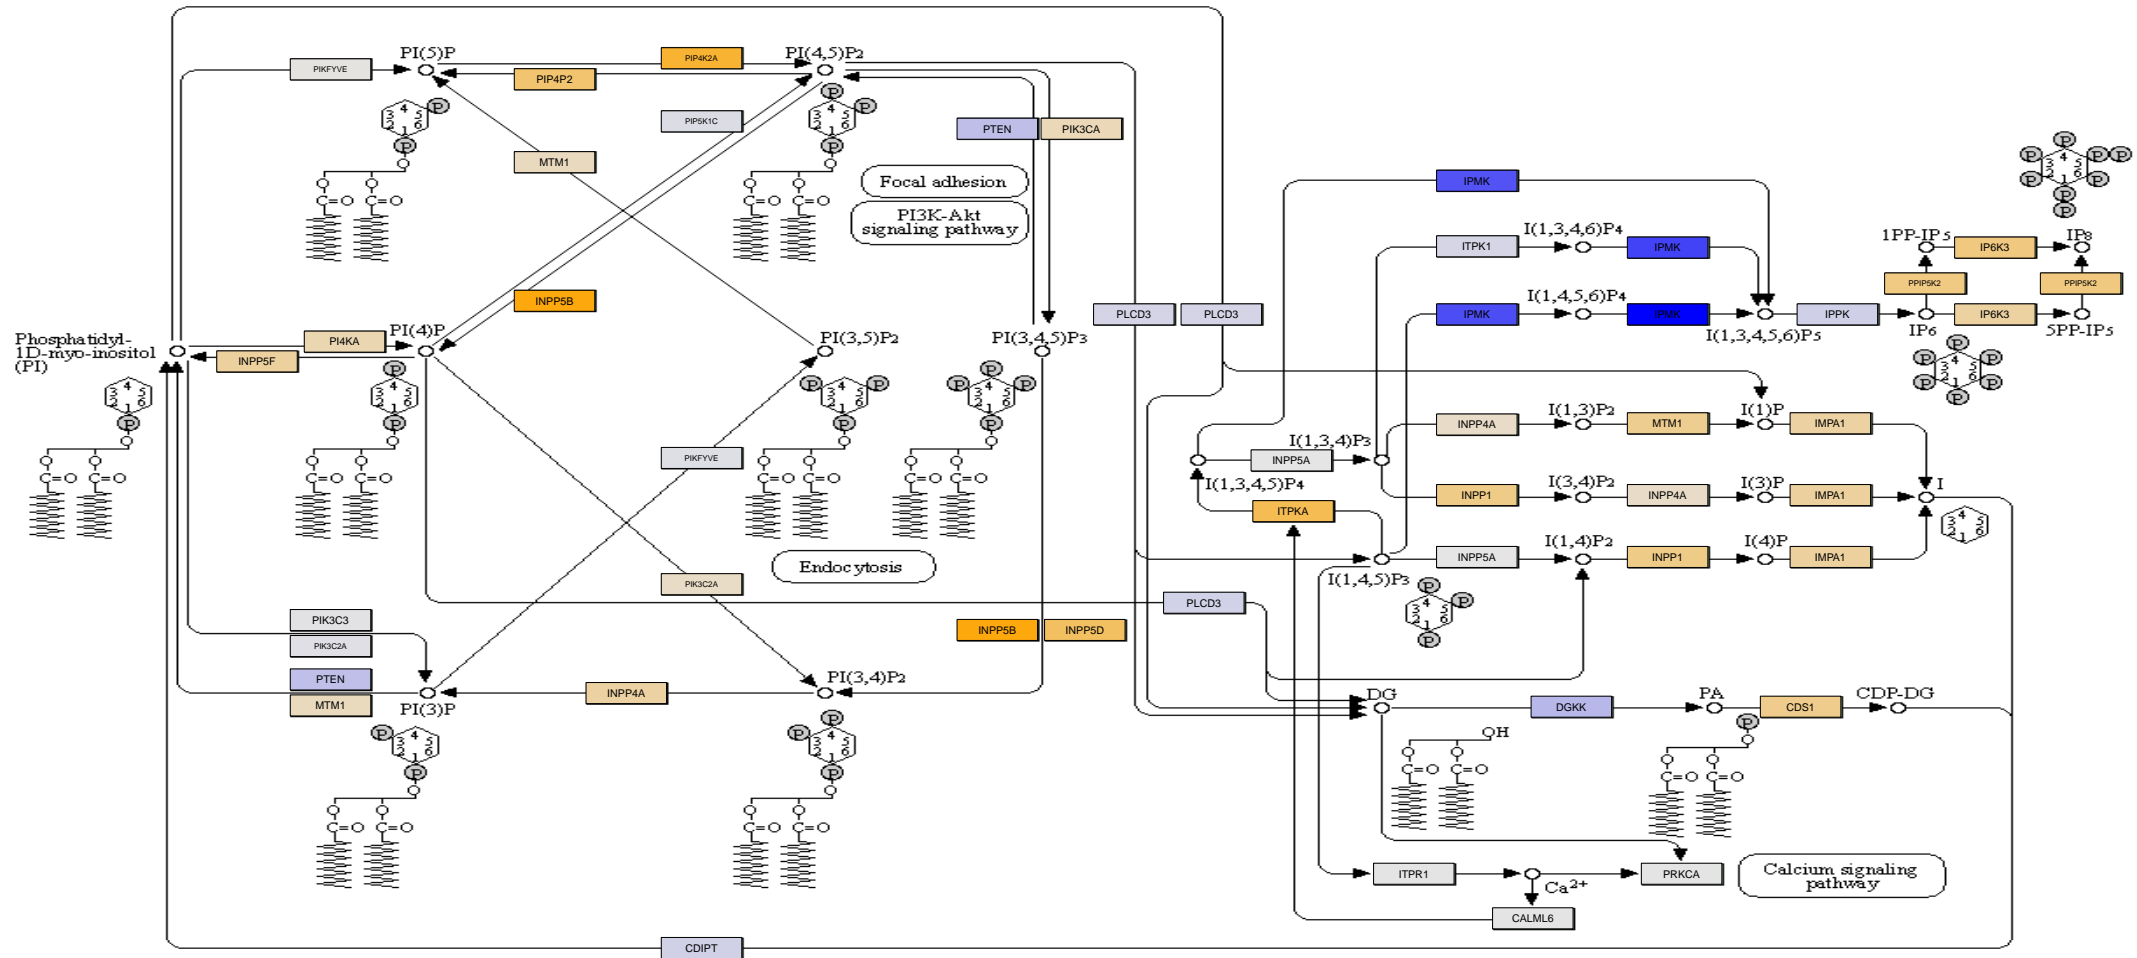



Phosphatidylinositol\_signaling\_system  
Late Adult

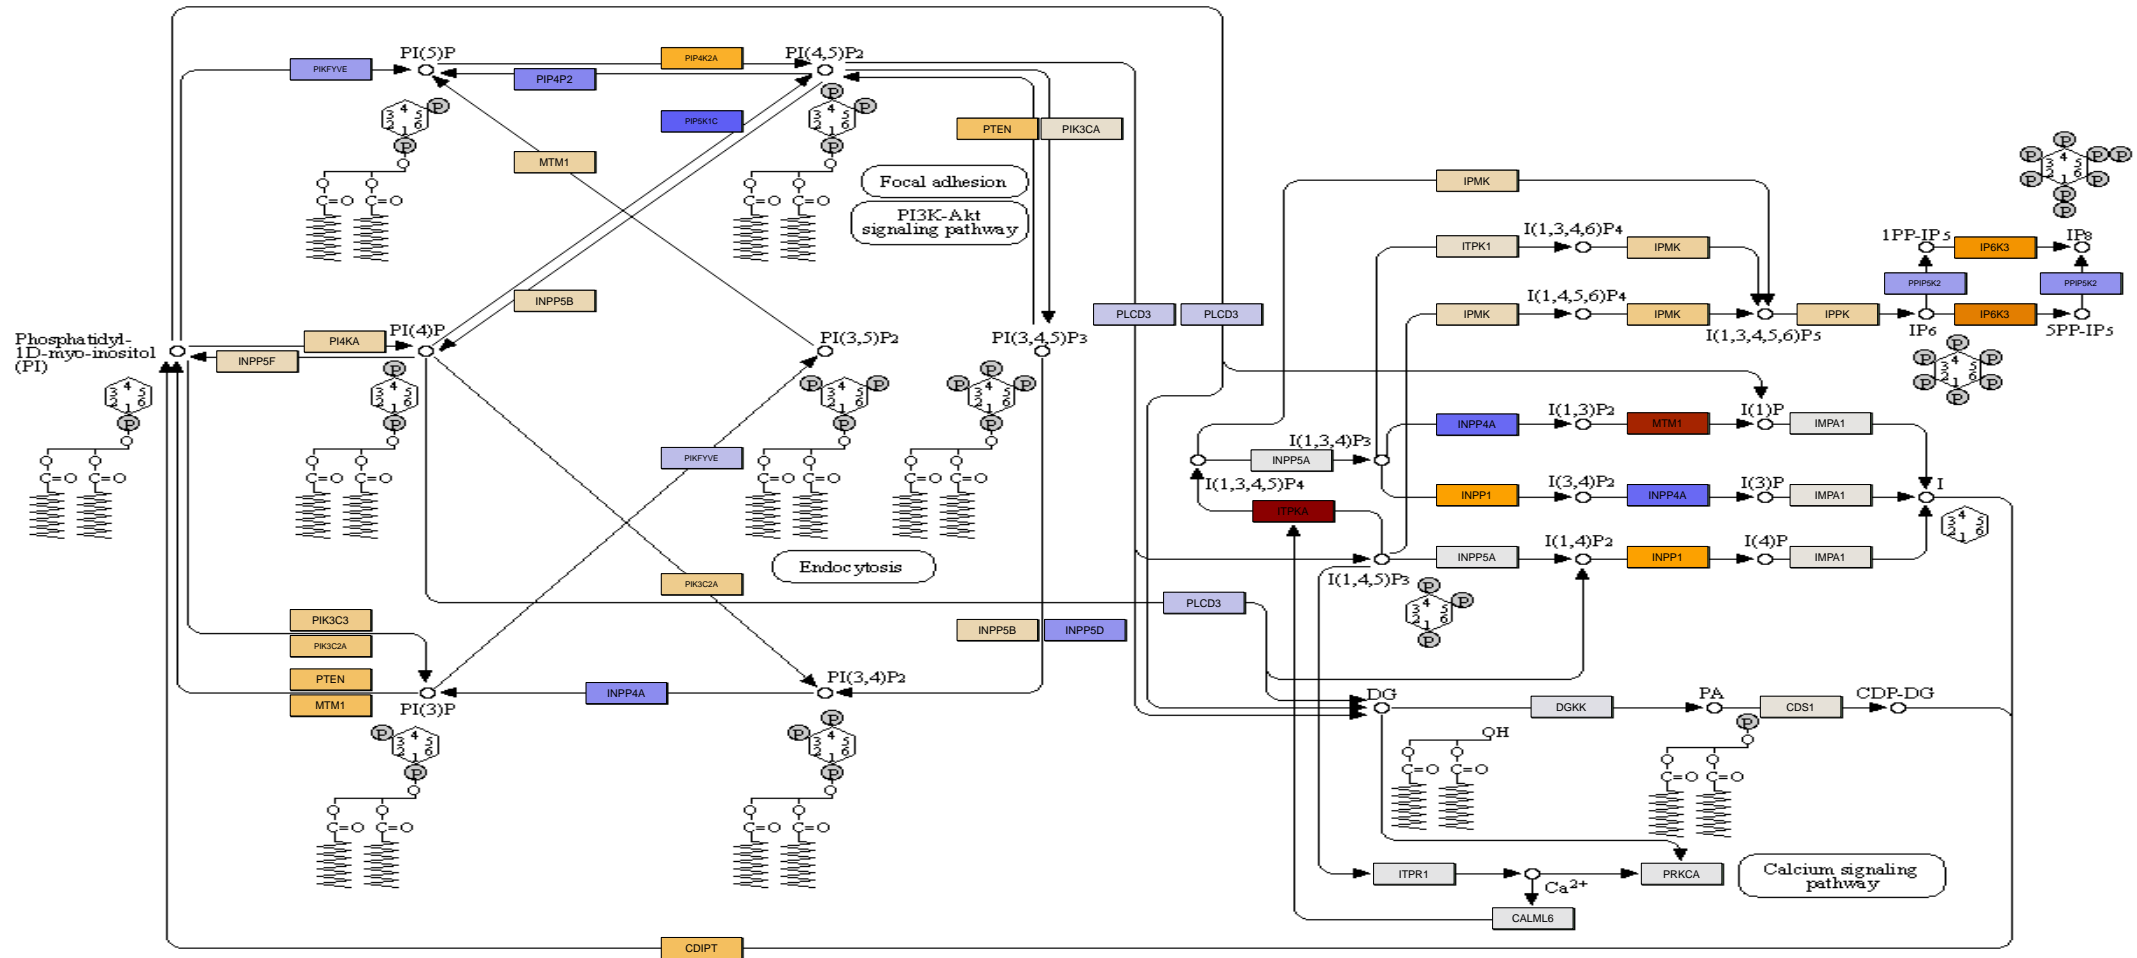

Supplement: s1 [file s1]
