# Supplementary material for: The Transcriptome and Methylome of the Developing and Aging Brain and Their Relations to Gliomas and Psychological Disorders
Source: MDPI journal article supplement (doi:10.3390/cells11030362), 2022-01-21

Neurotrophin signaling pathway

all genes

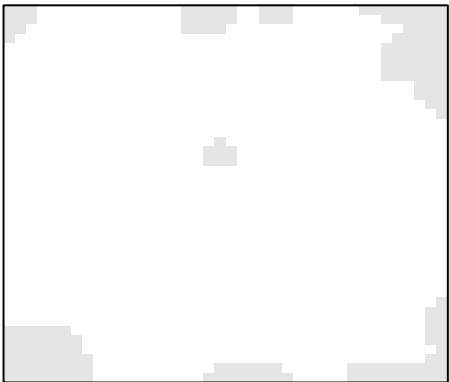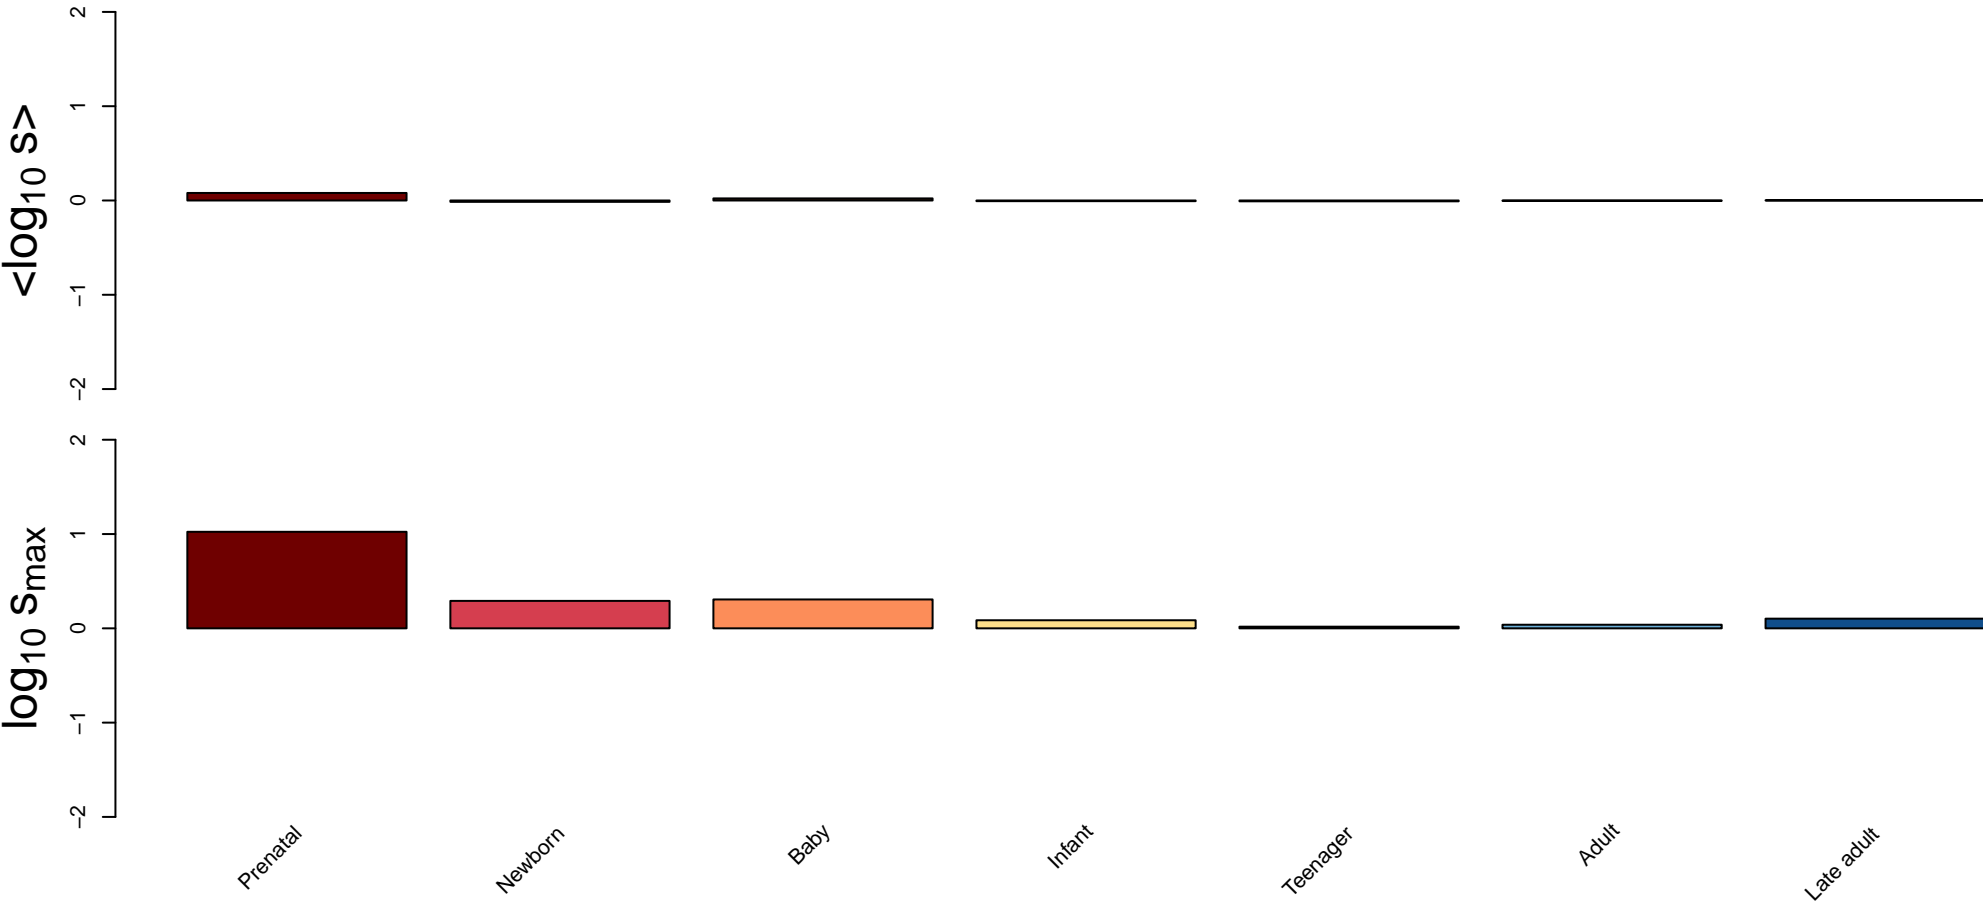

Neurotrophin signaling pathway  
genes with data

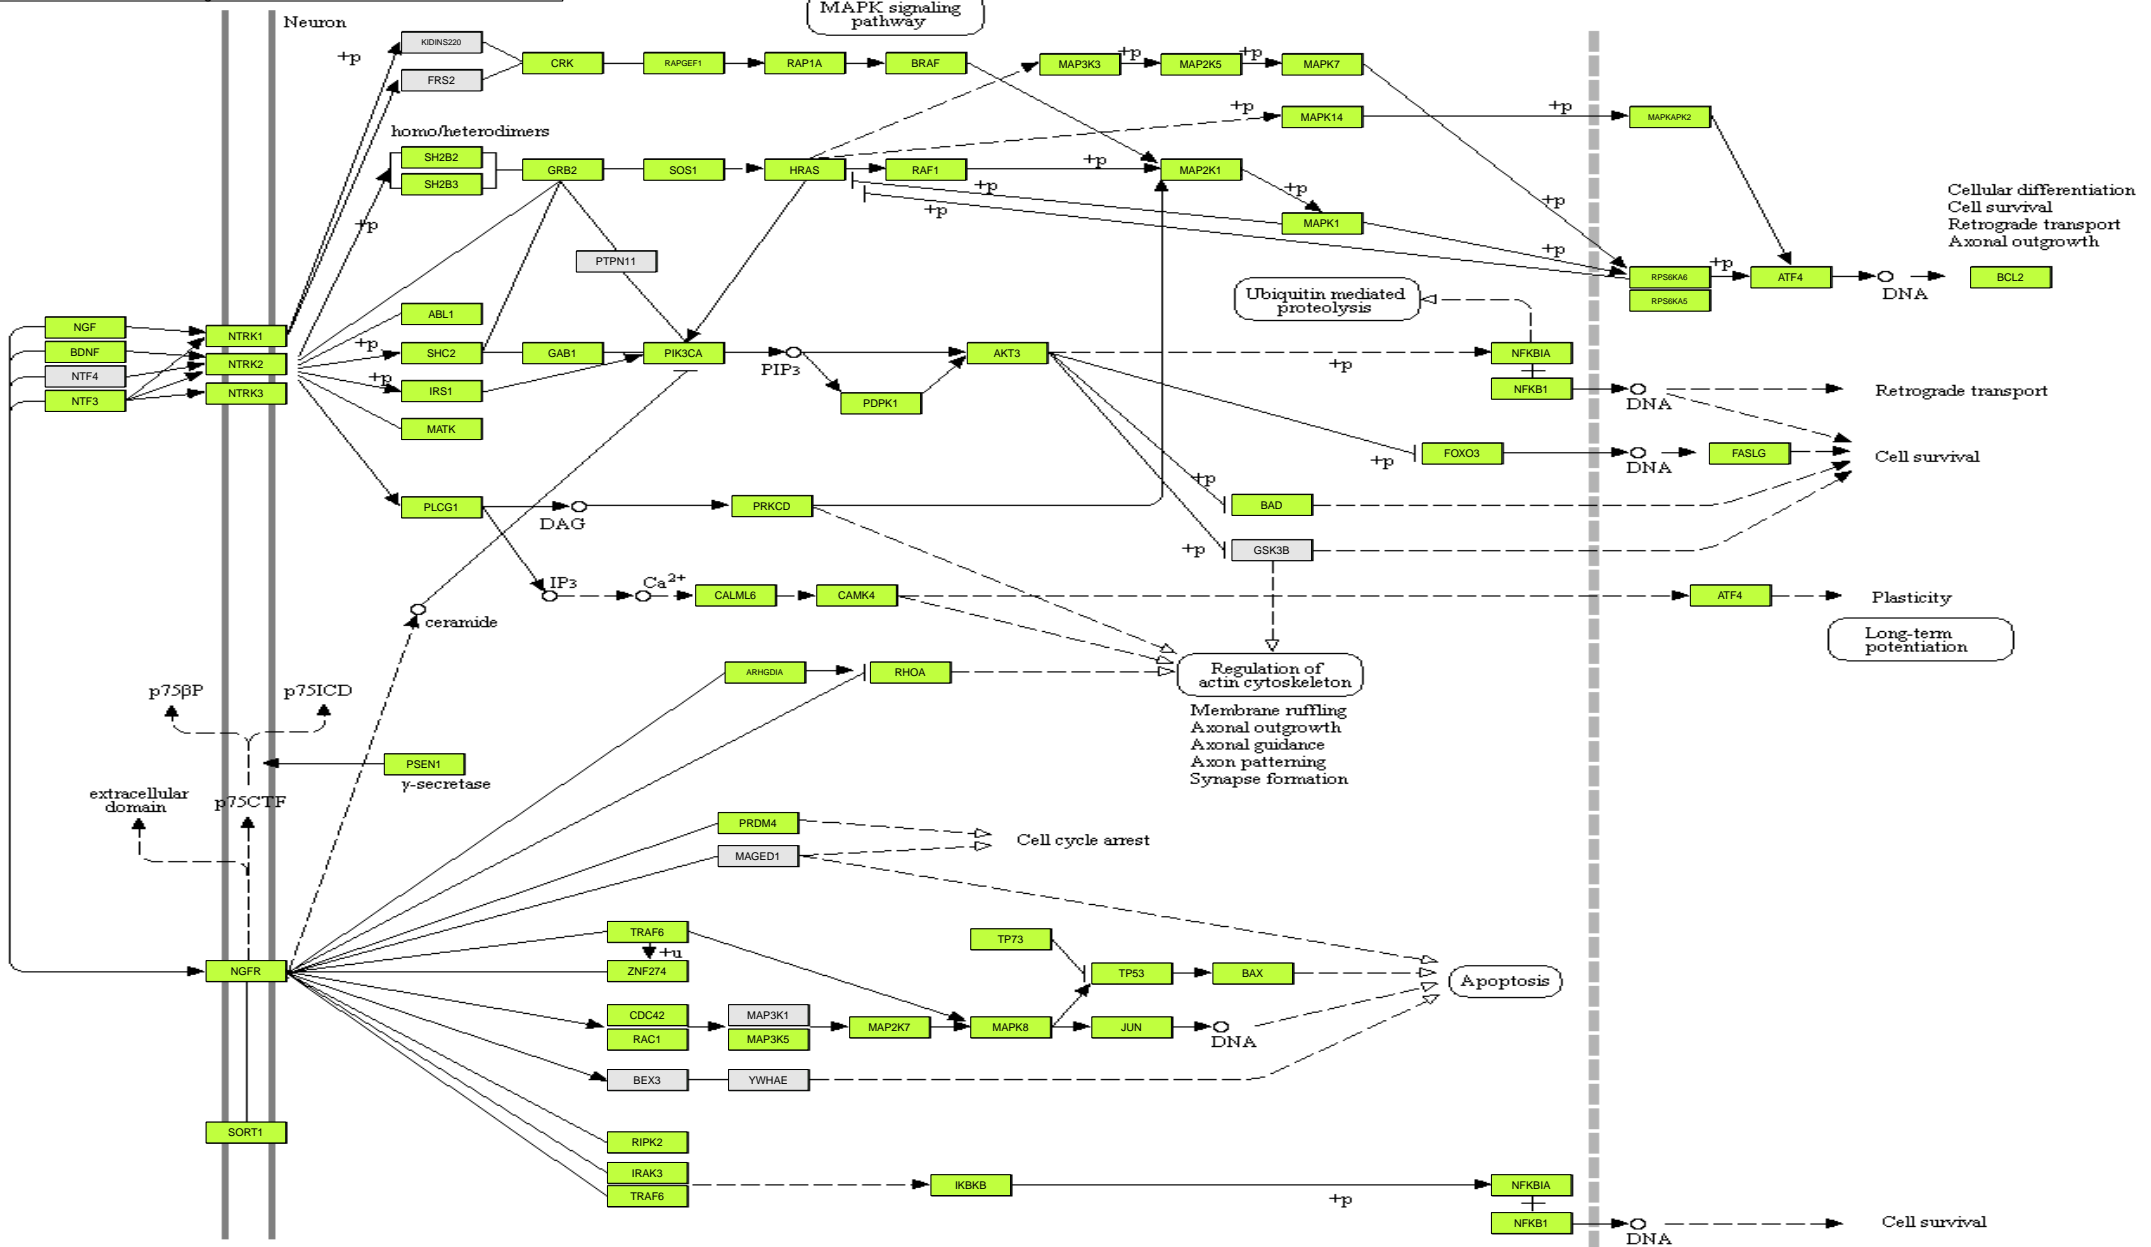



Neurotrophin signaling pathway  
Prenatal

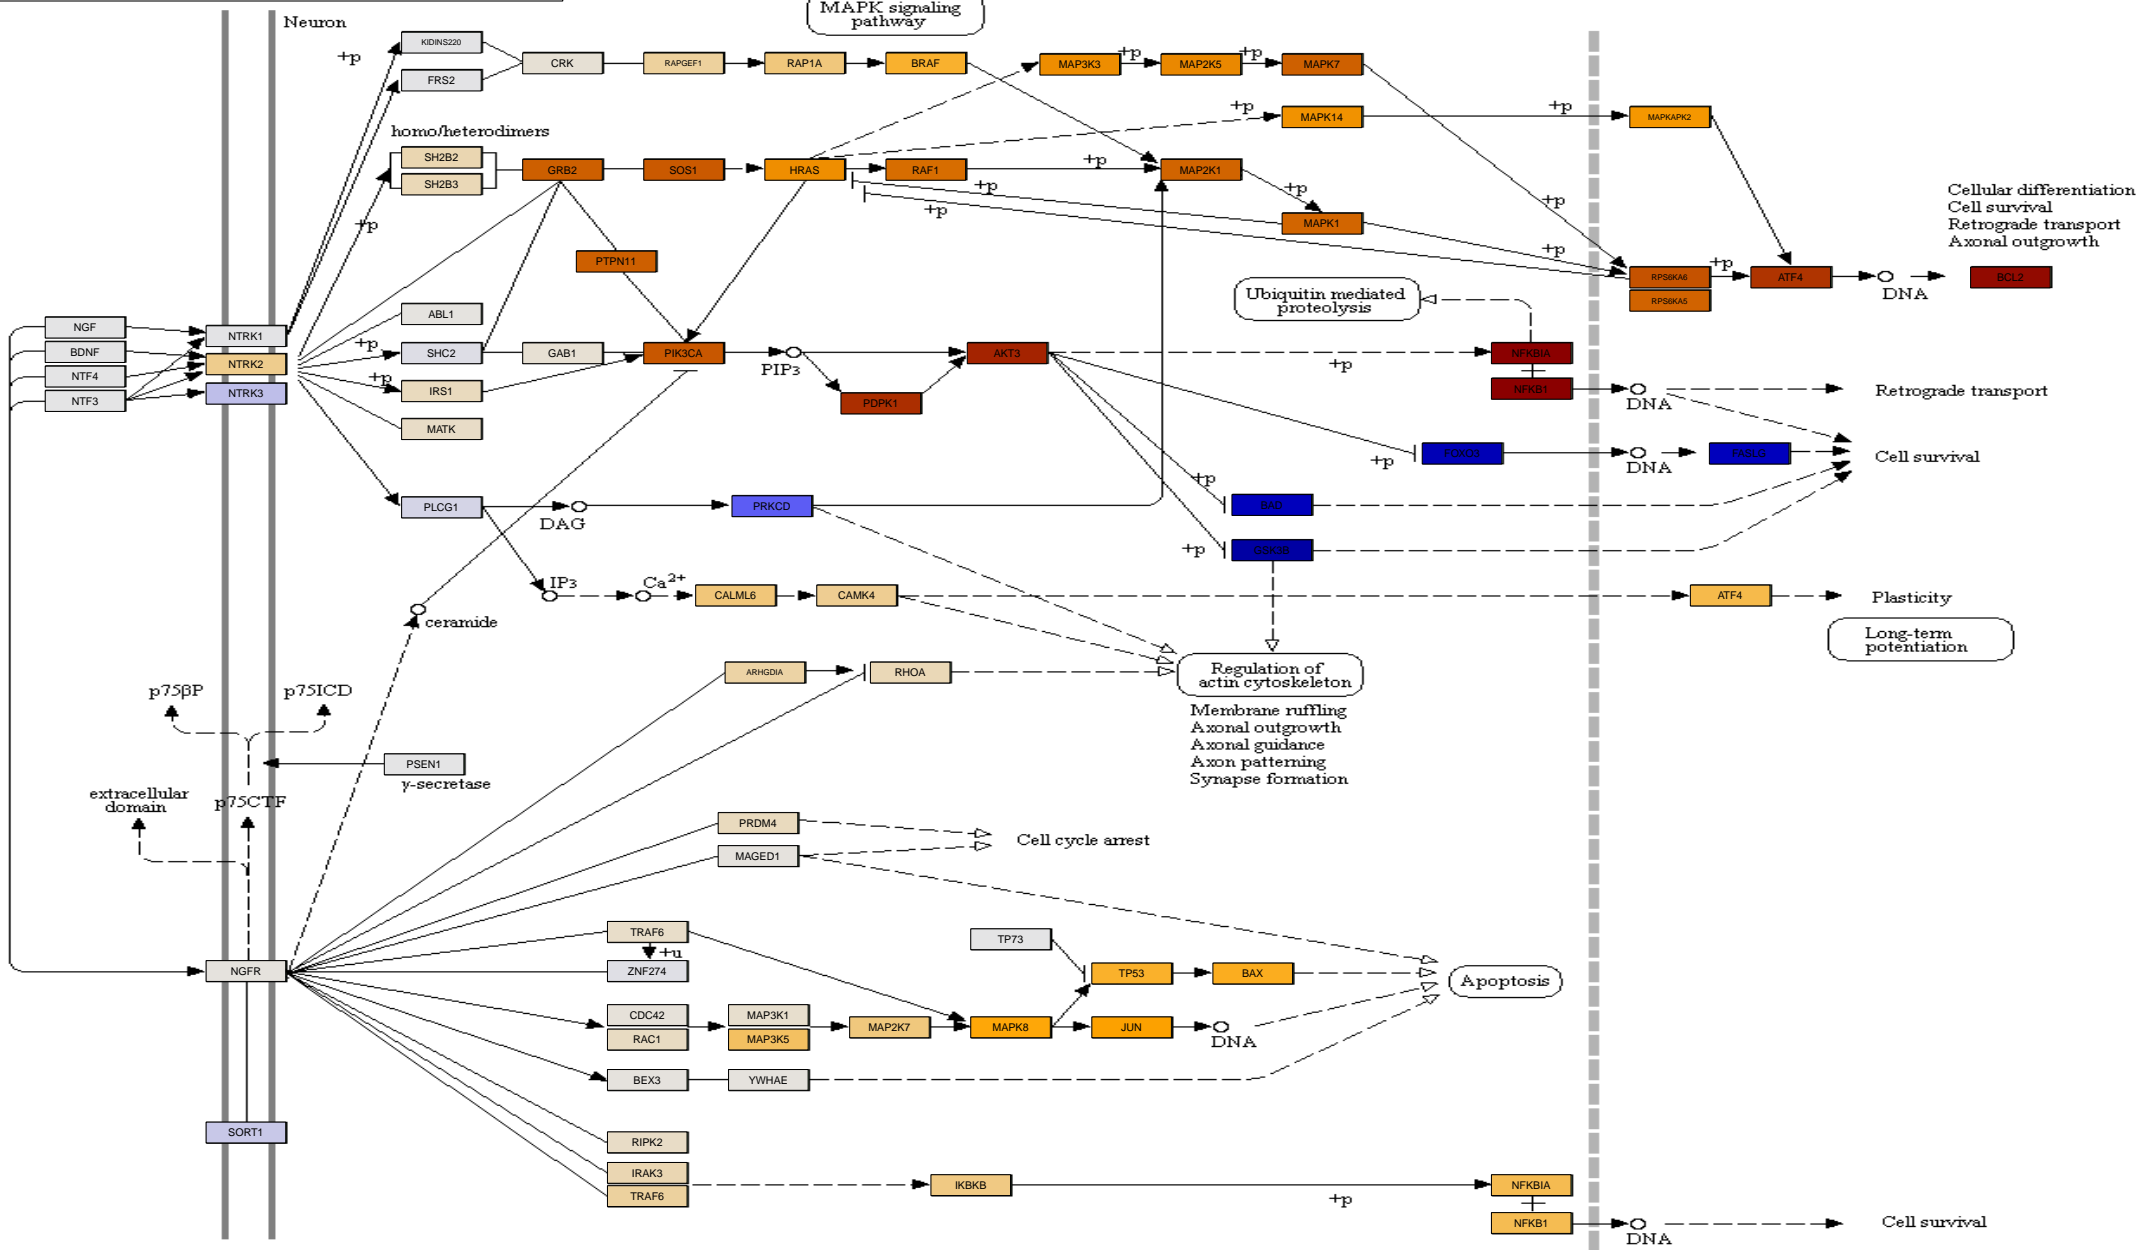

Neurotrophin signaling pathway  
Newborn

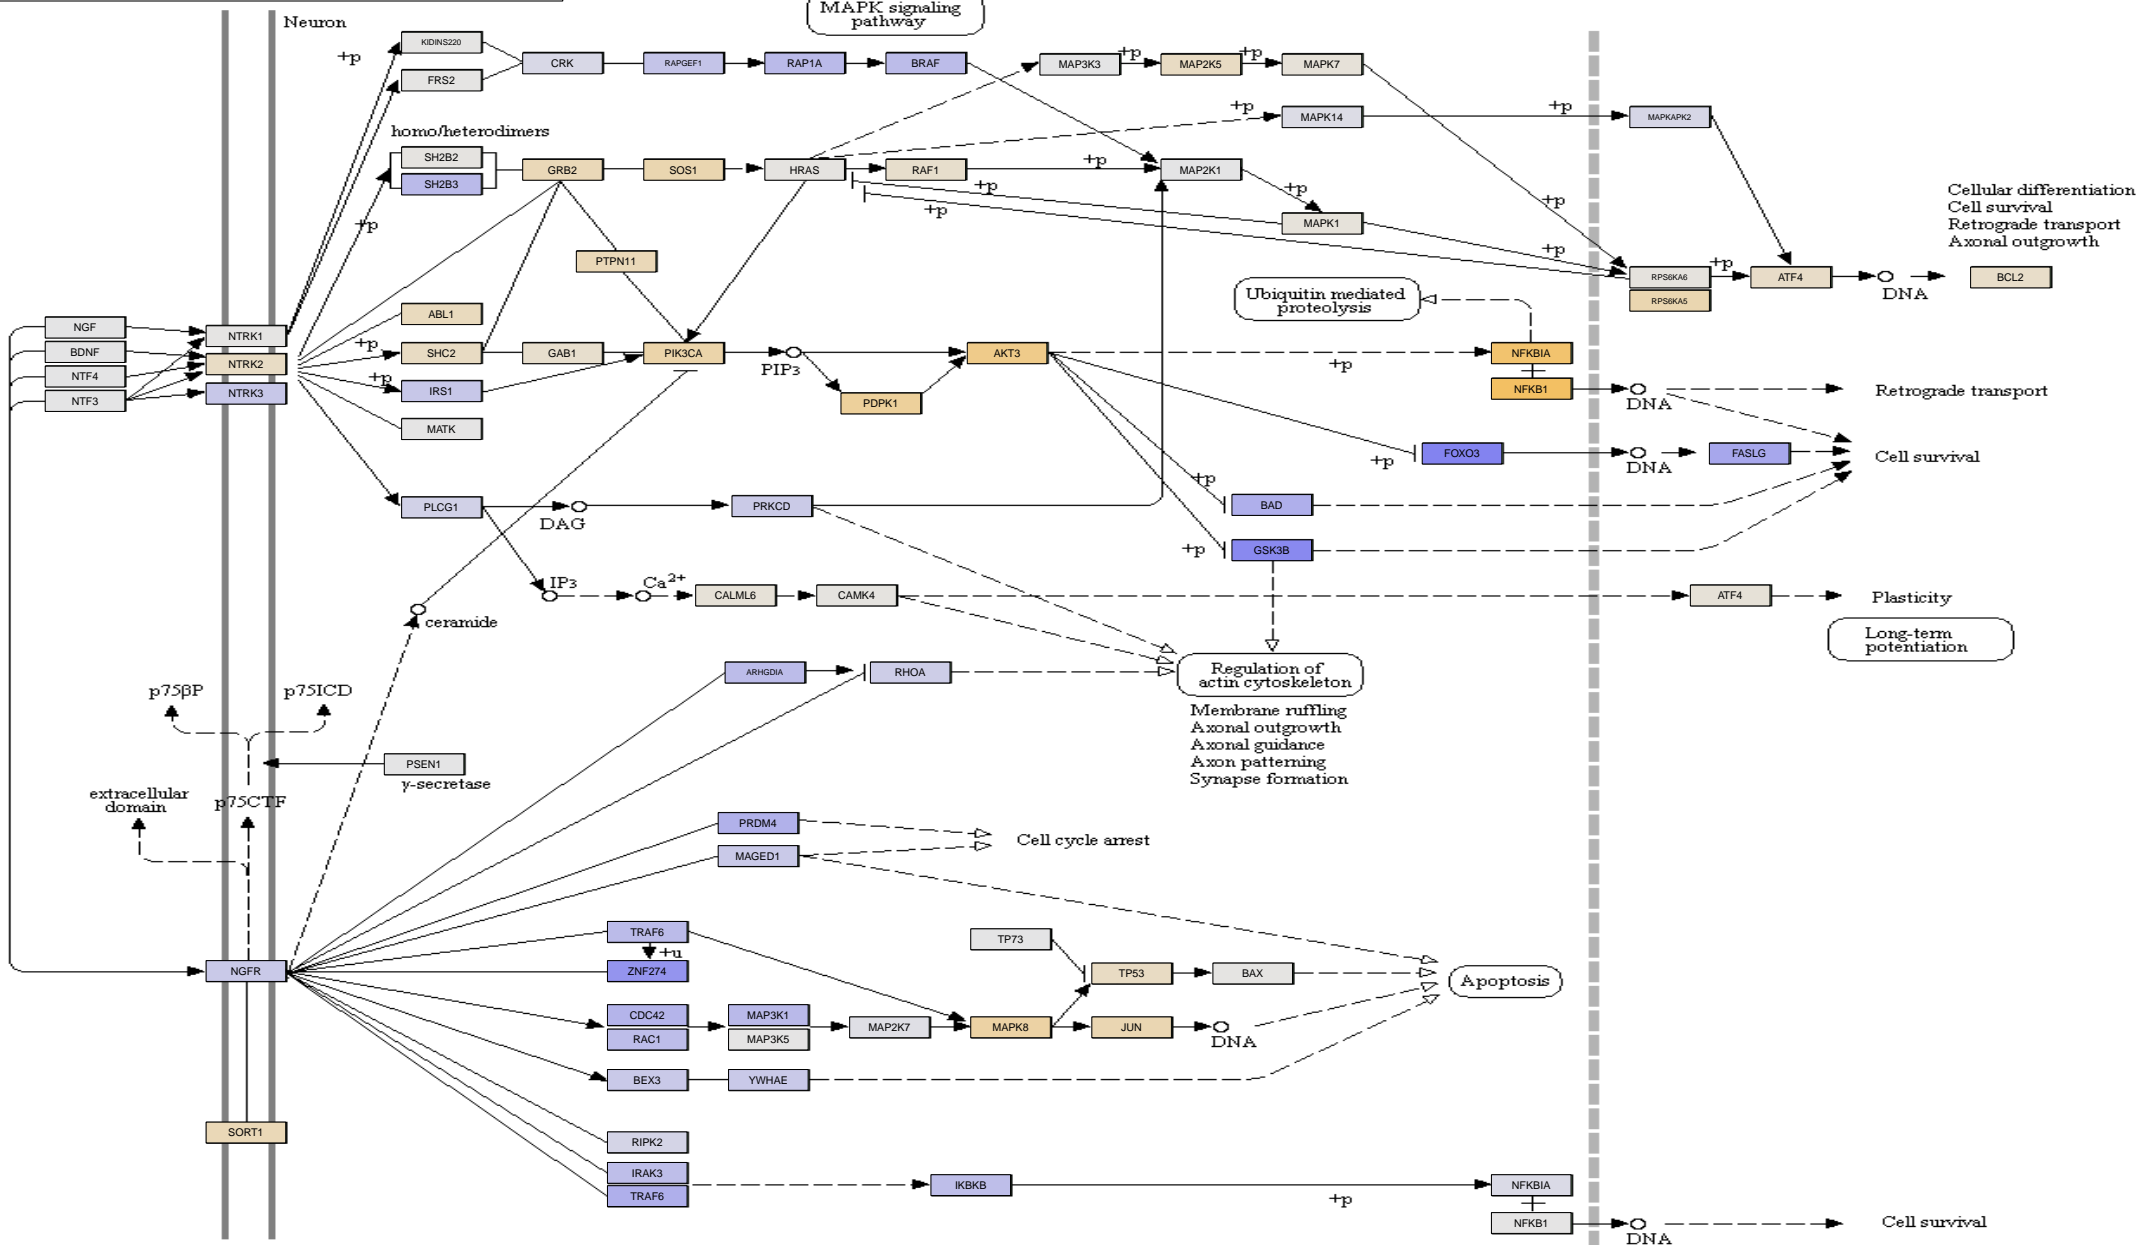

Neurotrophin signaling pathway  
Baby

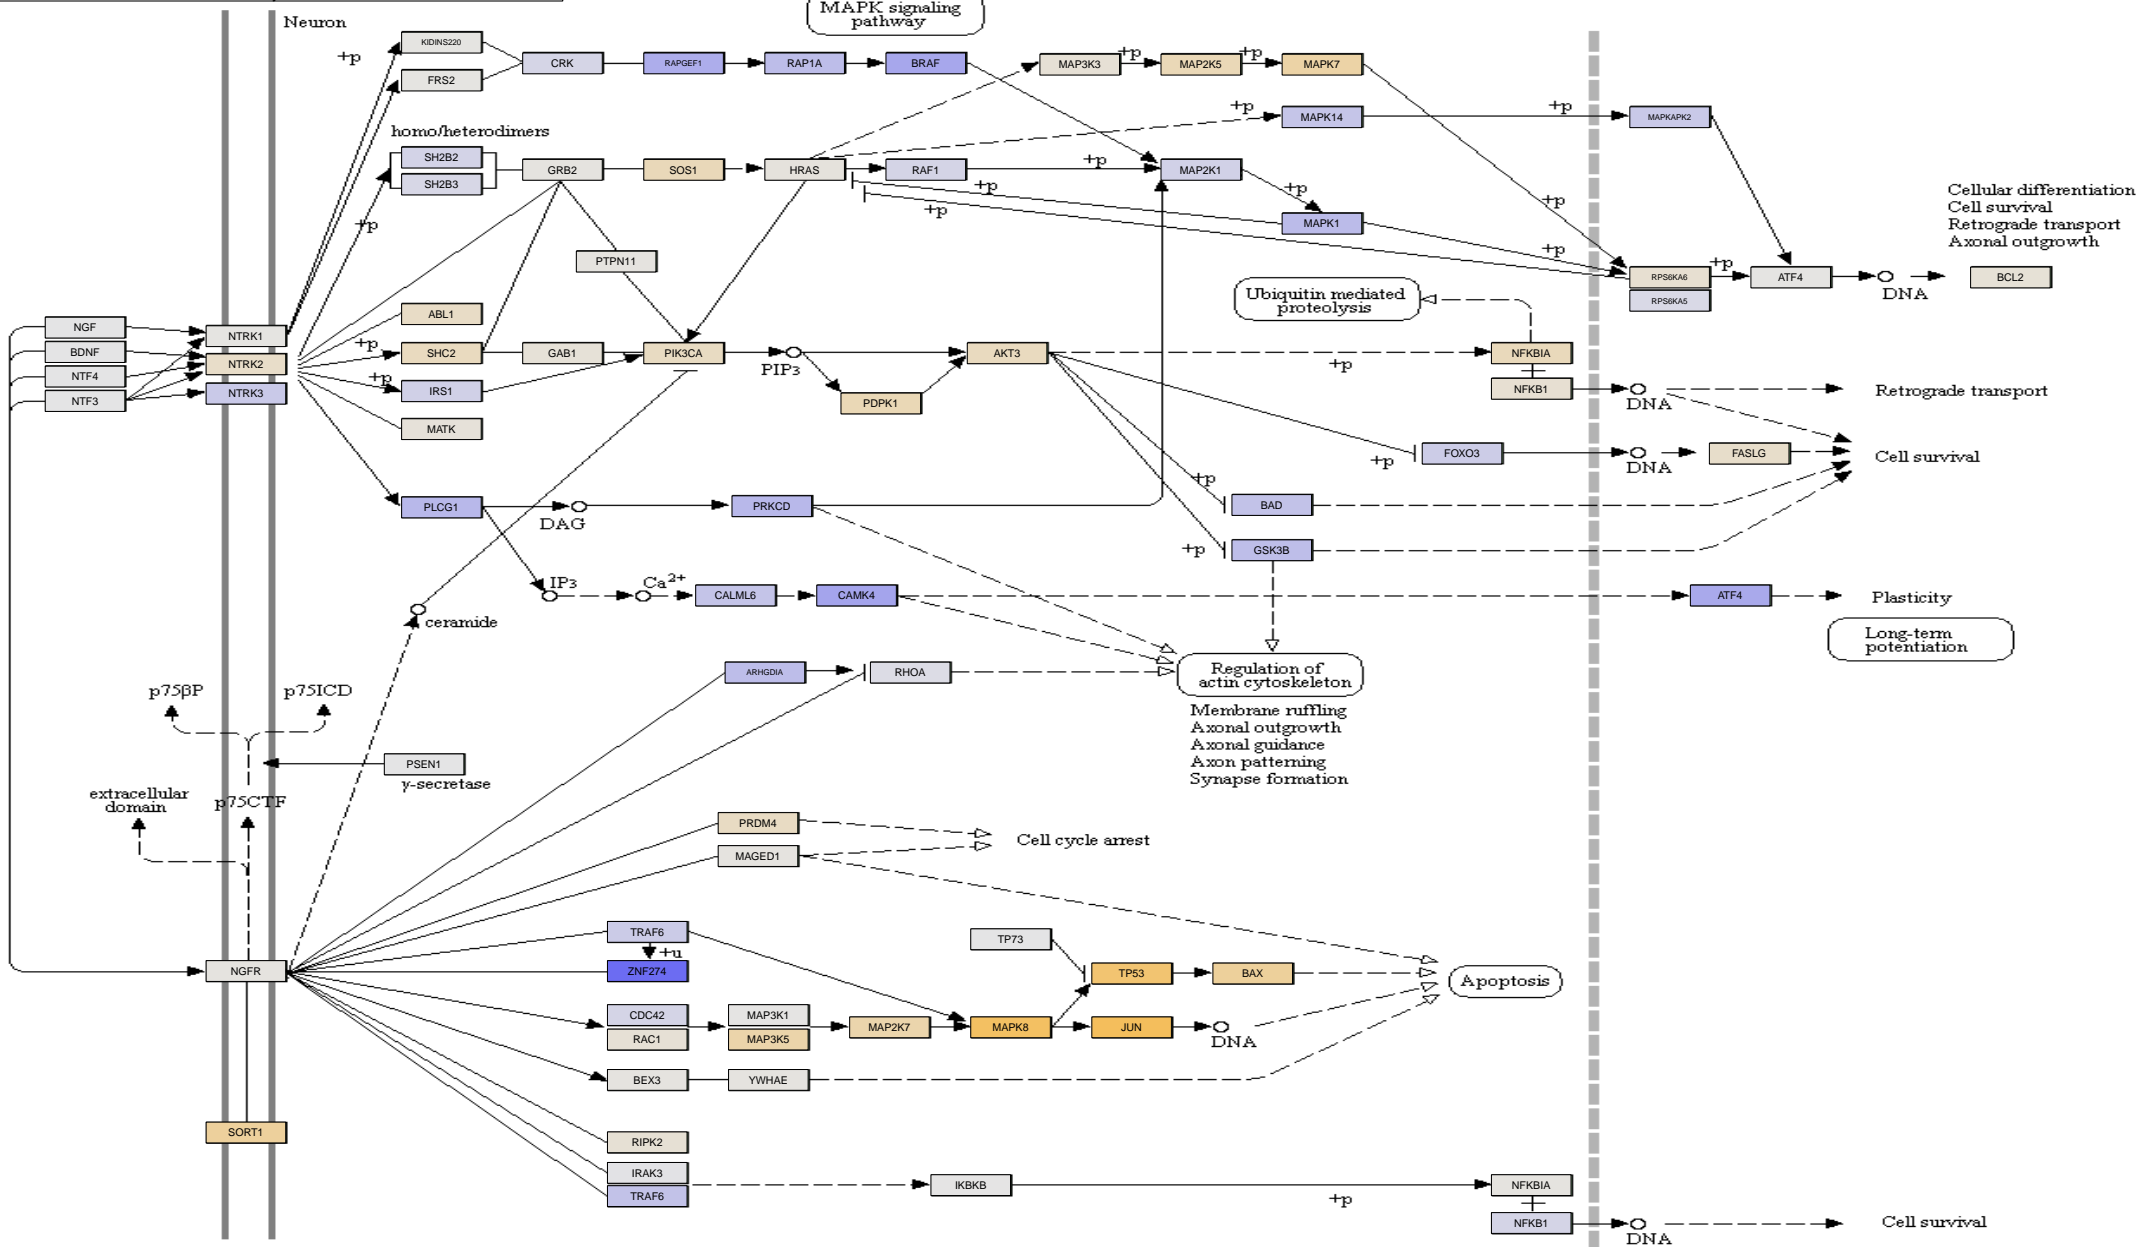



Neurotrophin signaling pathway  
Teenager

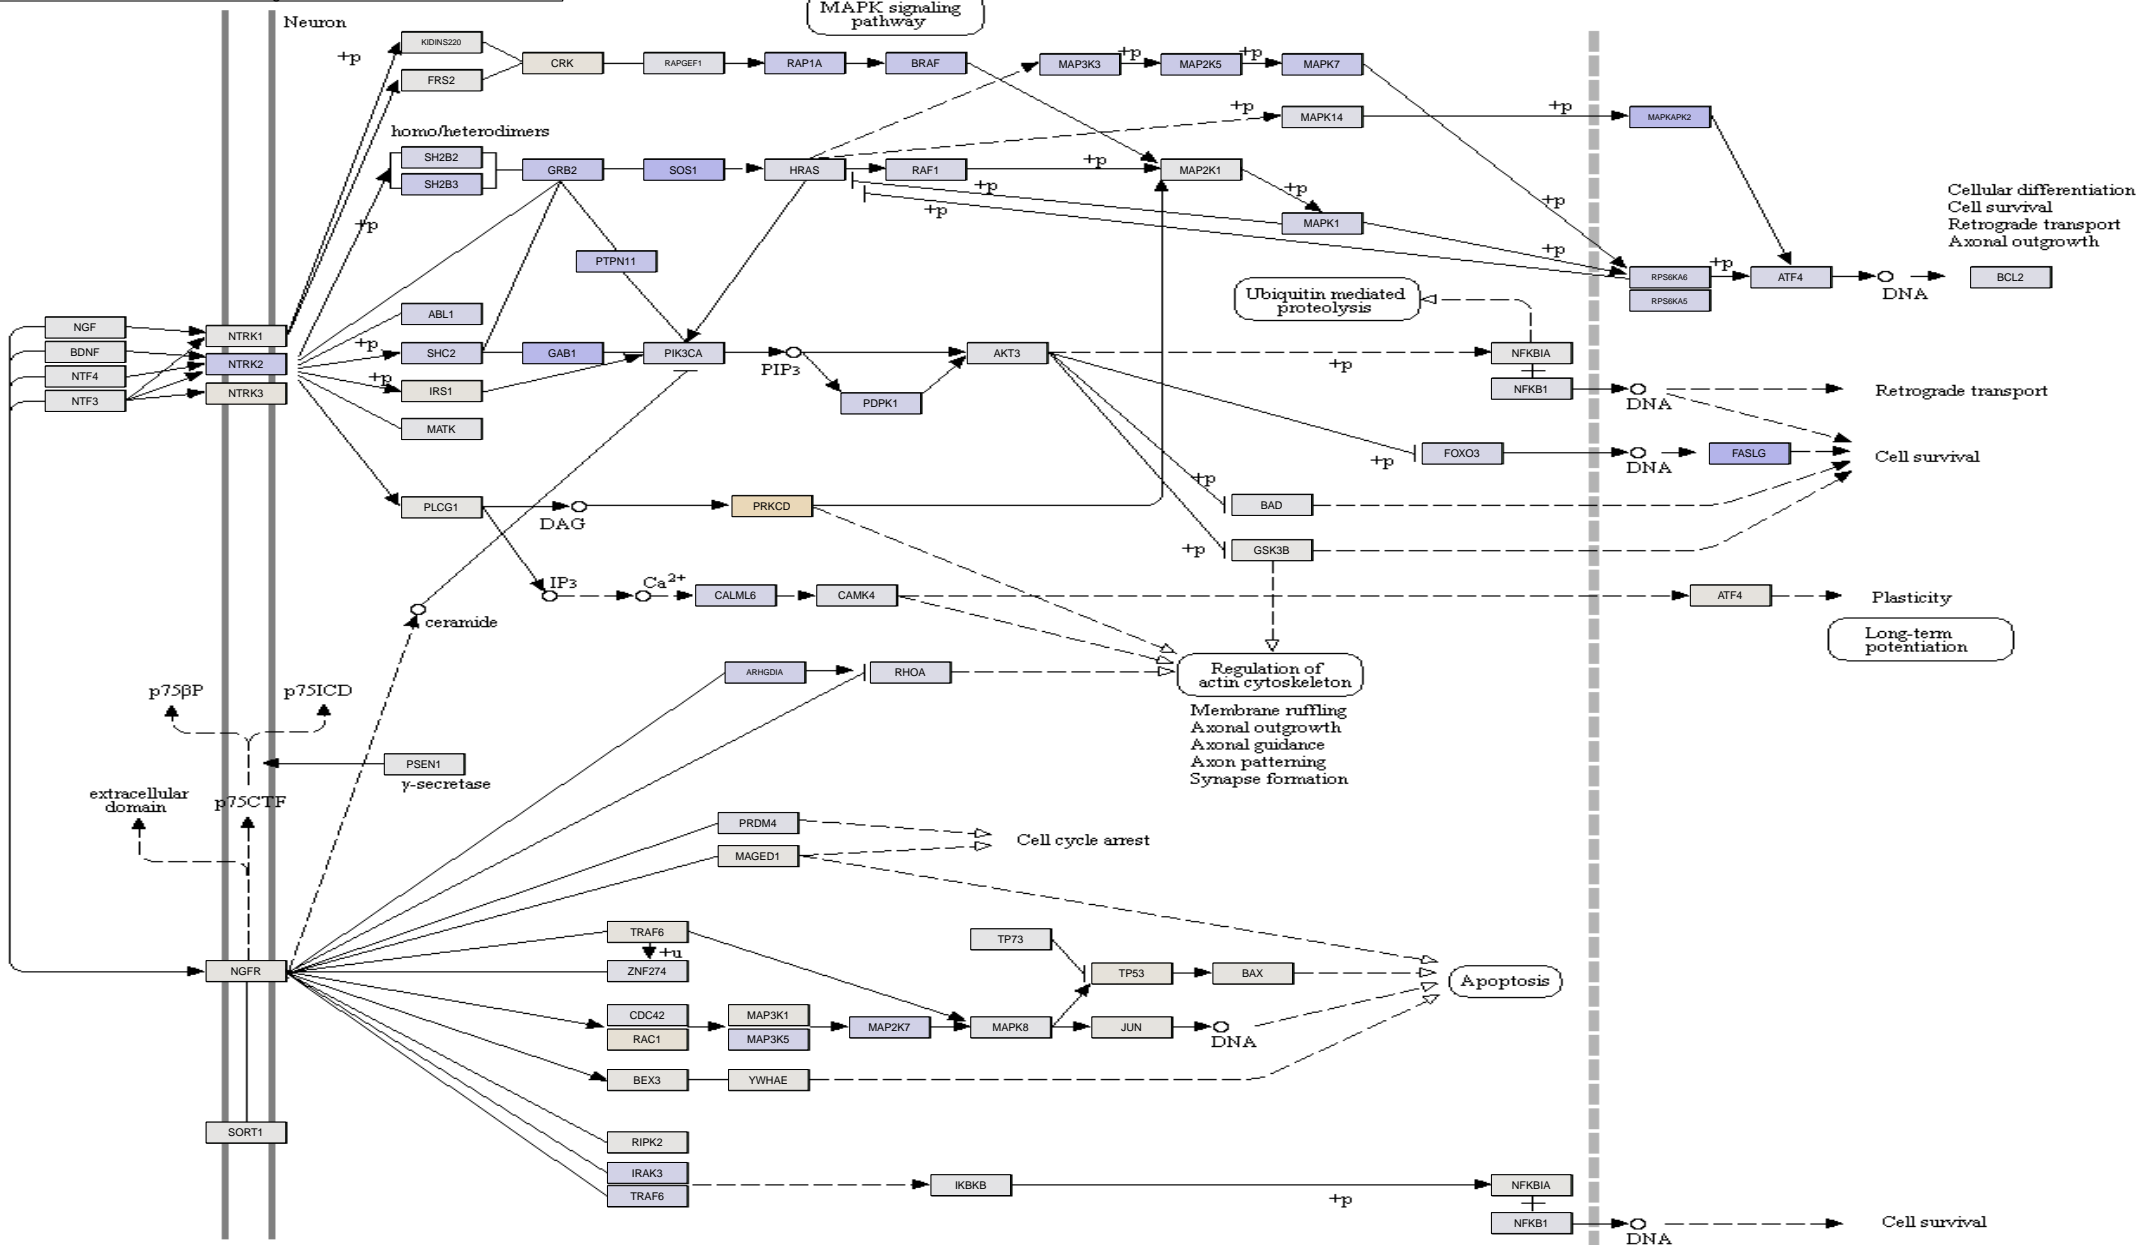



Neurotrophin signaling pathway  
Adult

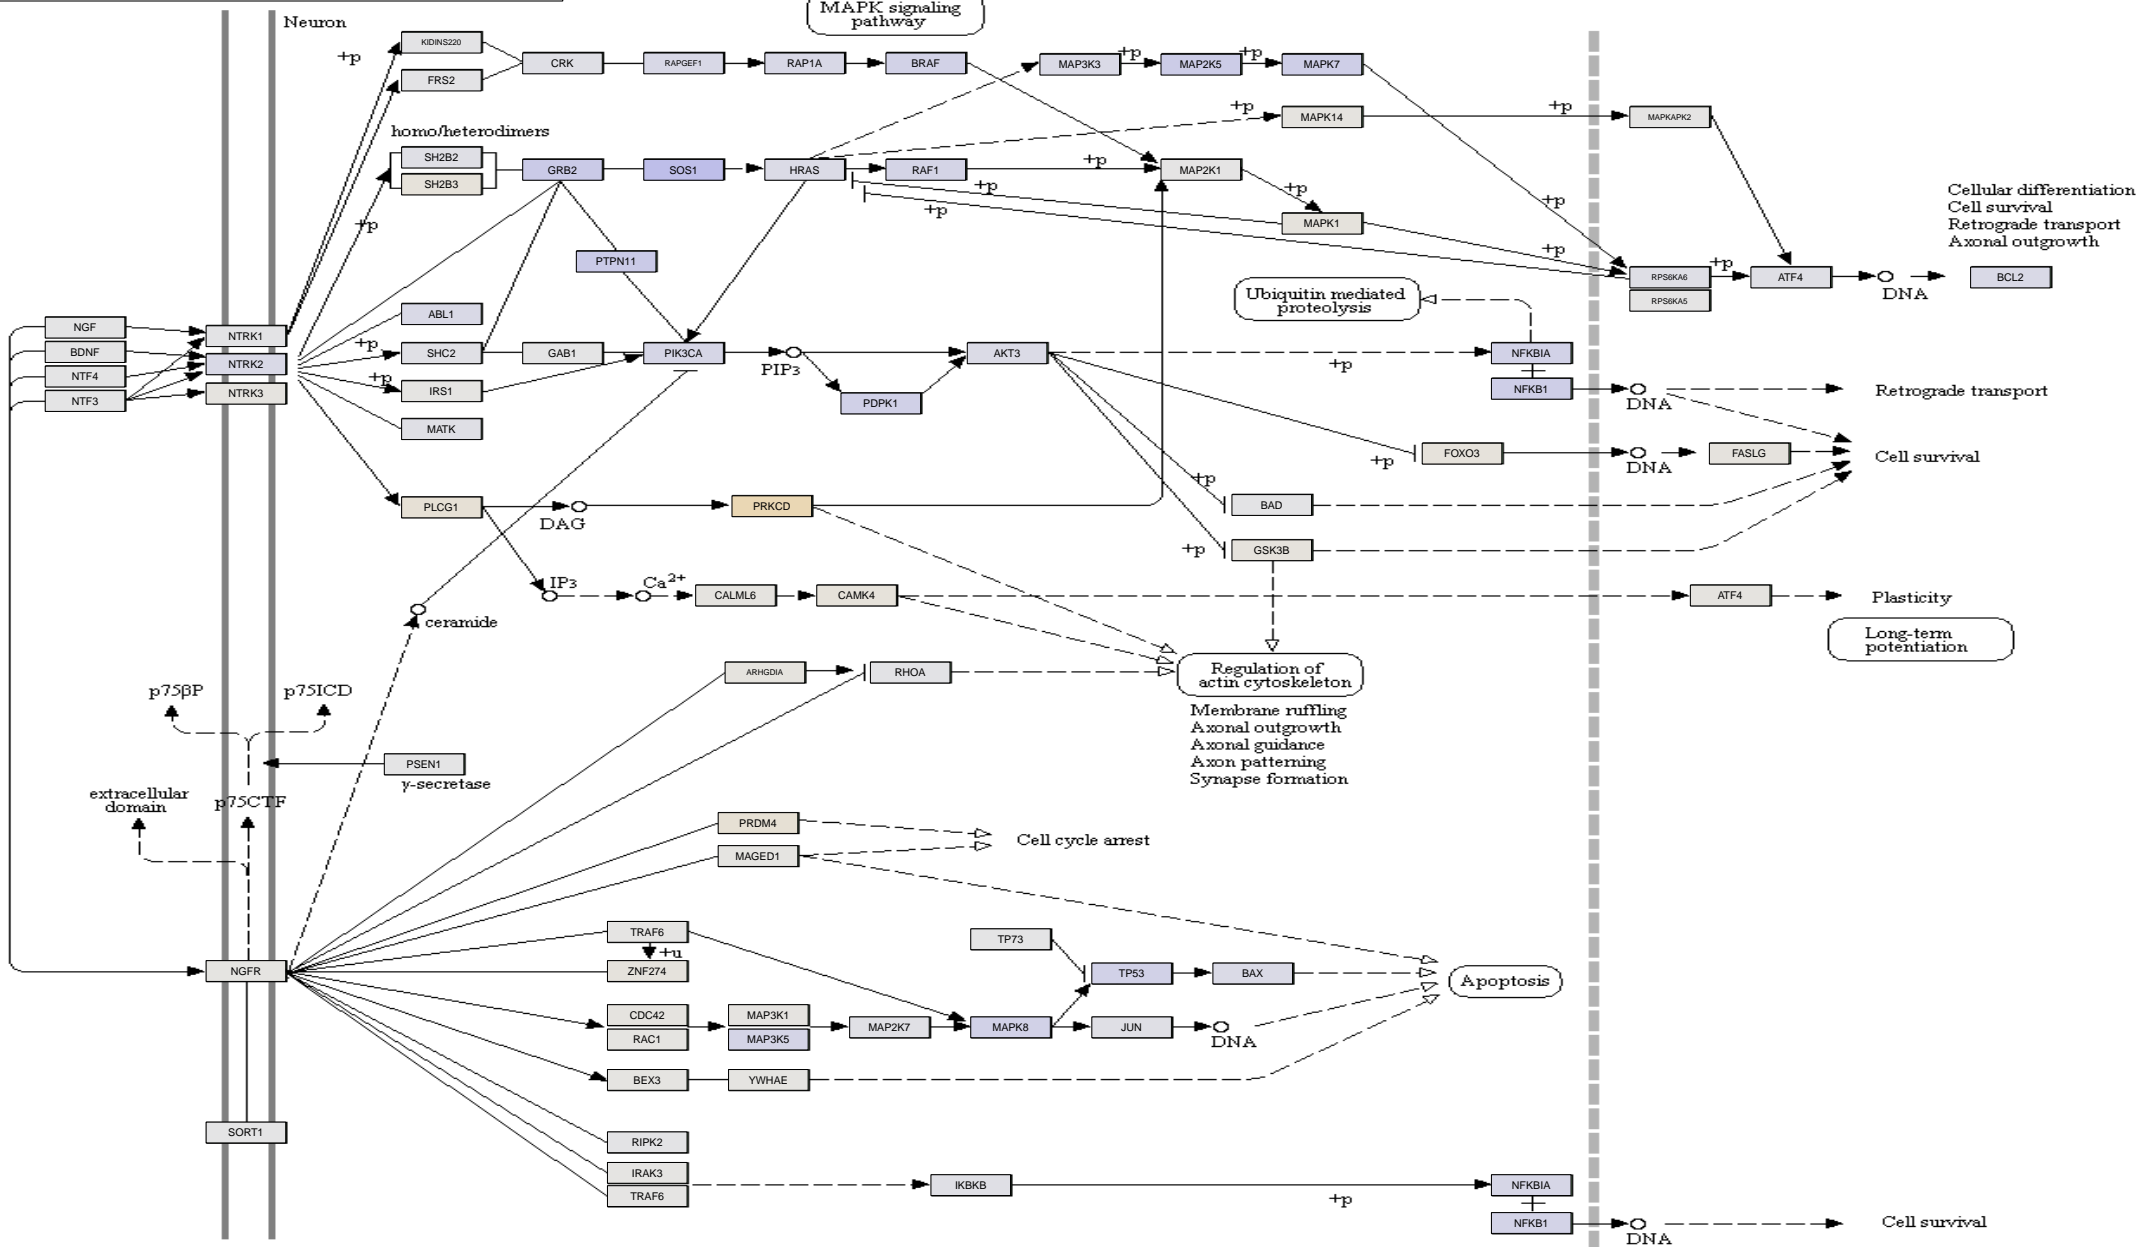

Supplement: s1 [file s1]
