# Supplementary material for: The Transcriptome and Methylome of the Developing and Aging Brain and Their Relations to Gliomas and Psychological Disorders
Source: MDPI journal article supplement (doi:10.3390/cells11030362), 2022-01-21

NOD-like receptor signaling pathway

all genes

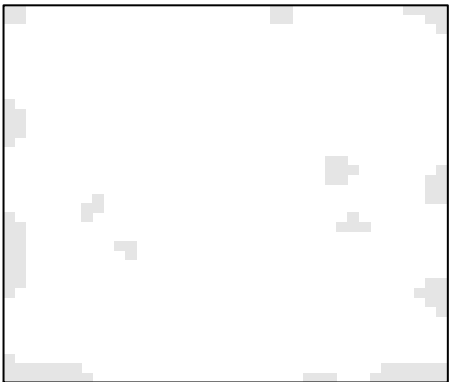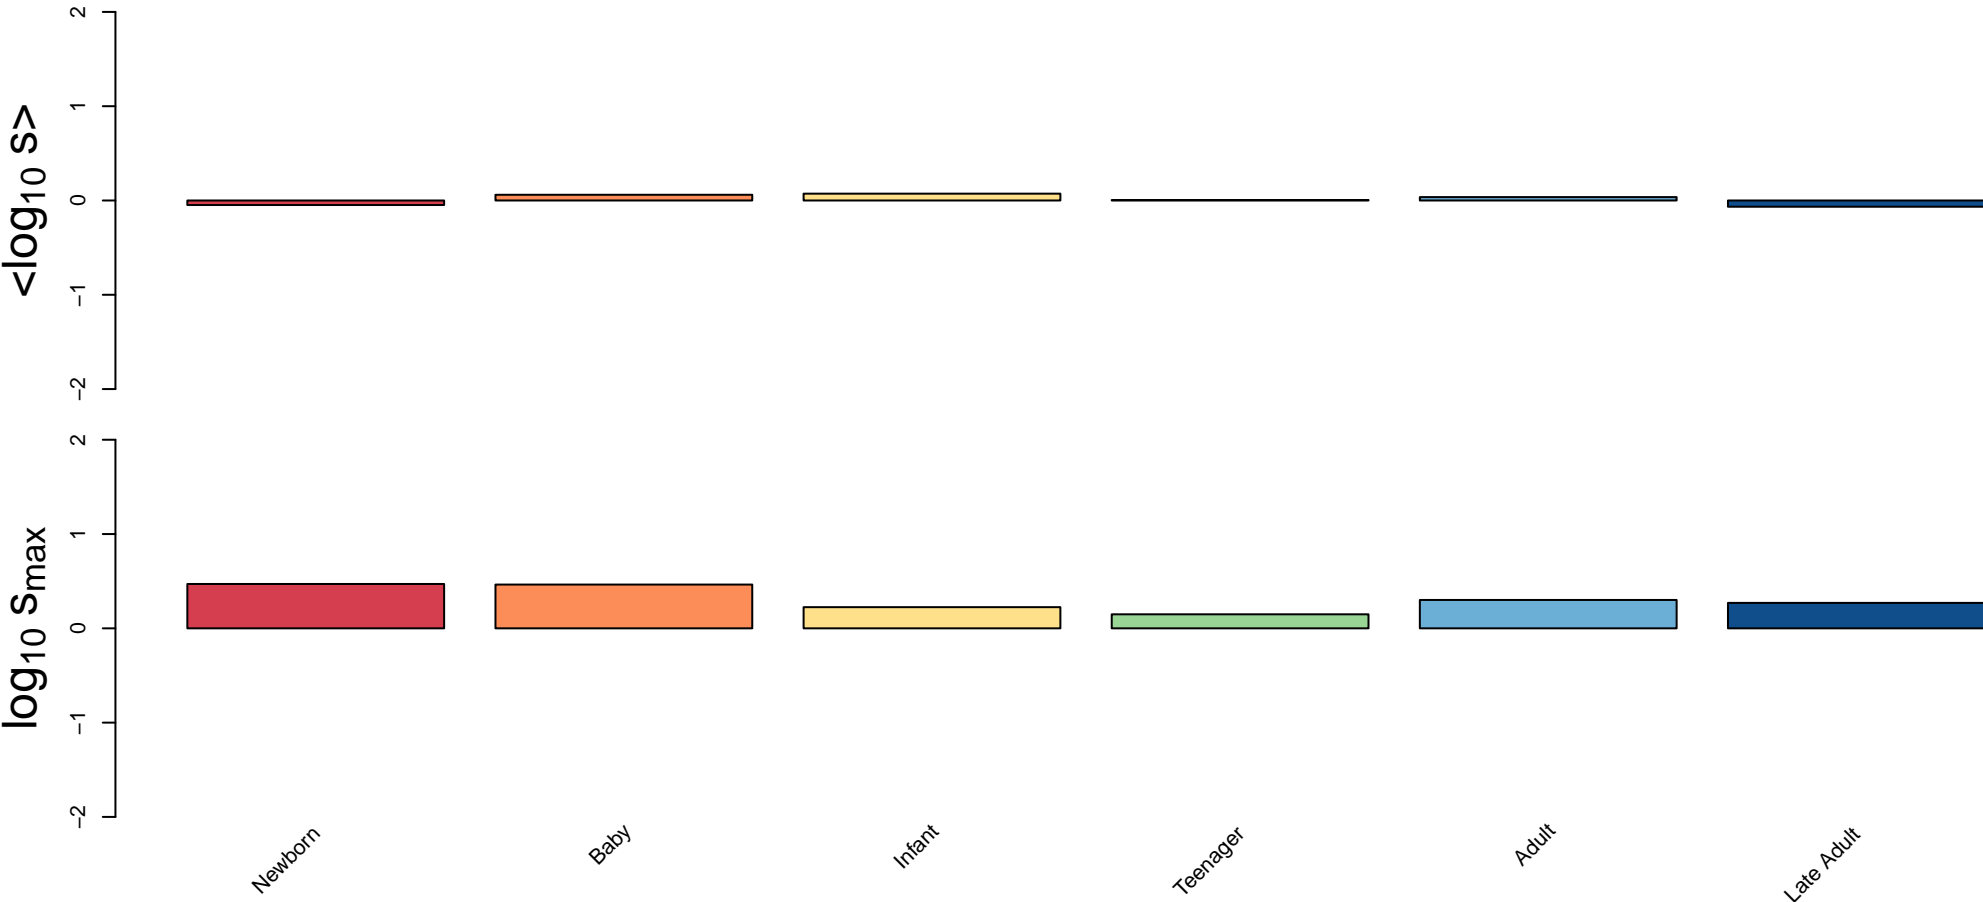

# NOD-like receptor signaling pathway genes with data

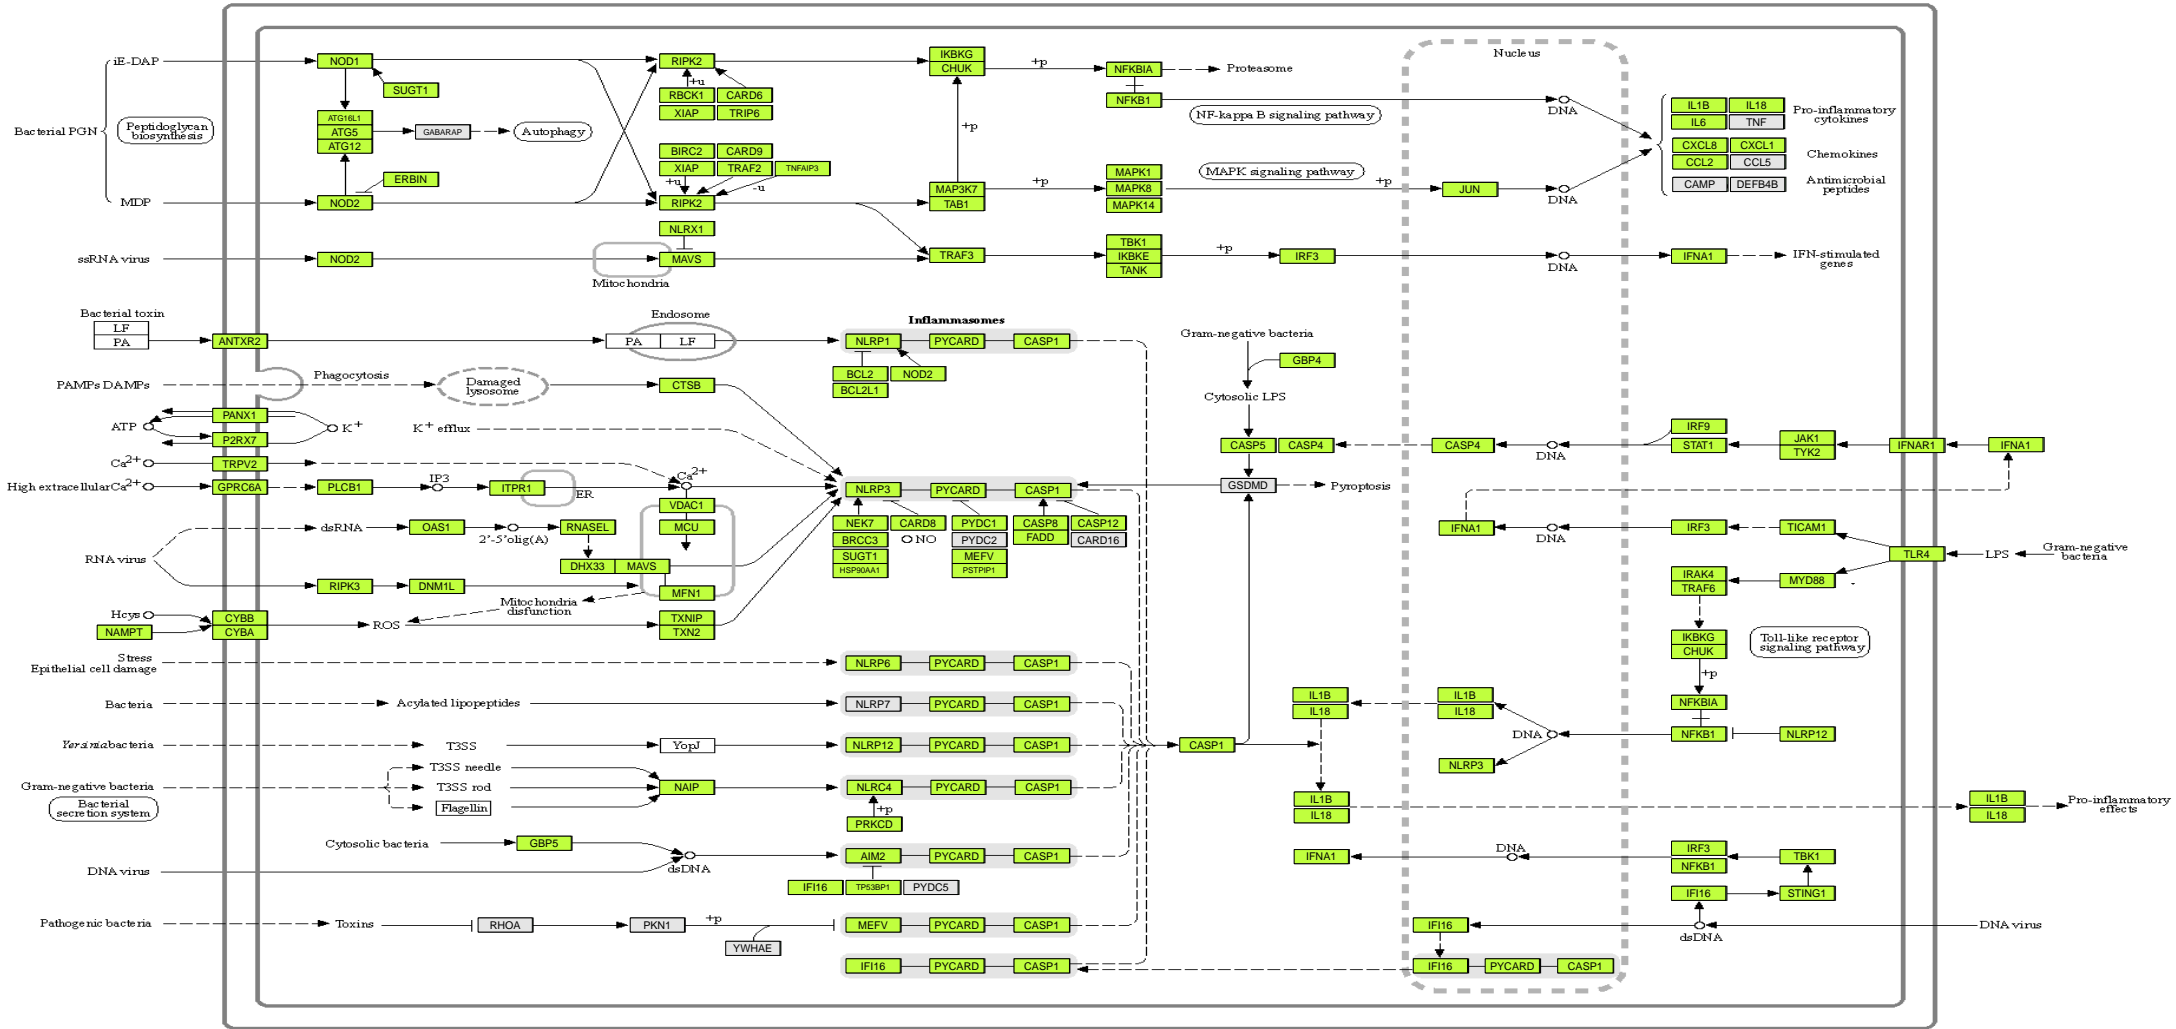

# NOD-like receptor signaling pathway sink-nodes

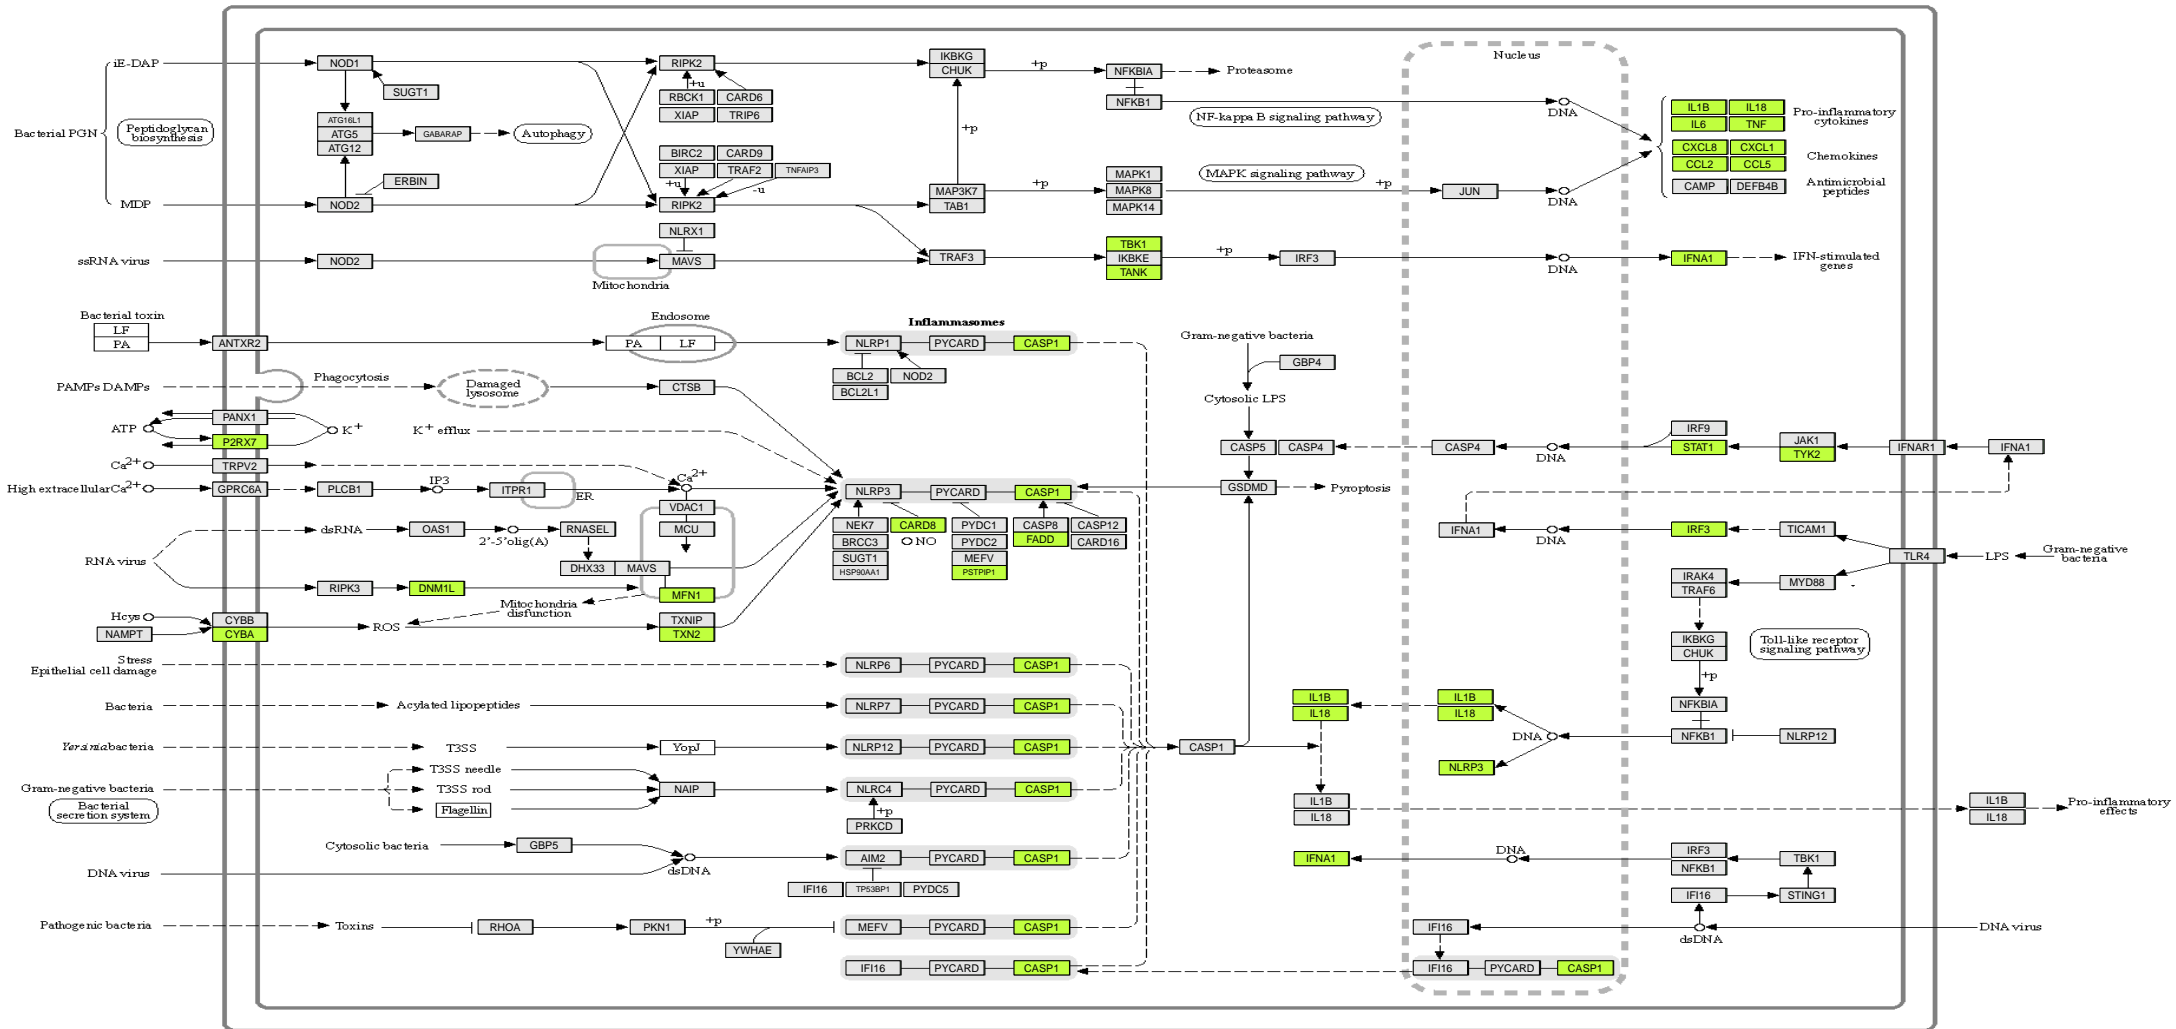

NOD\_like\_receptor\_signaling\_pathway  
Newborn

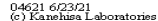

**Baby**



# NOD-like receptor signaling pathway

Teenager

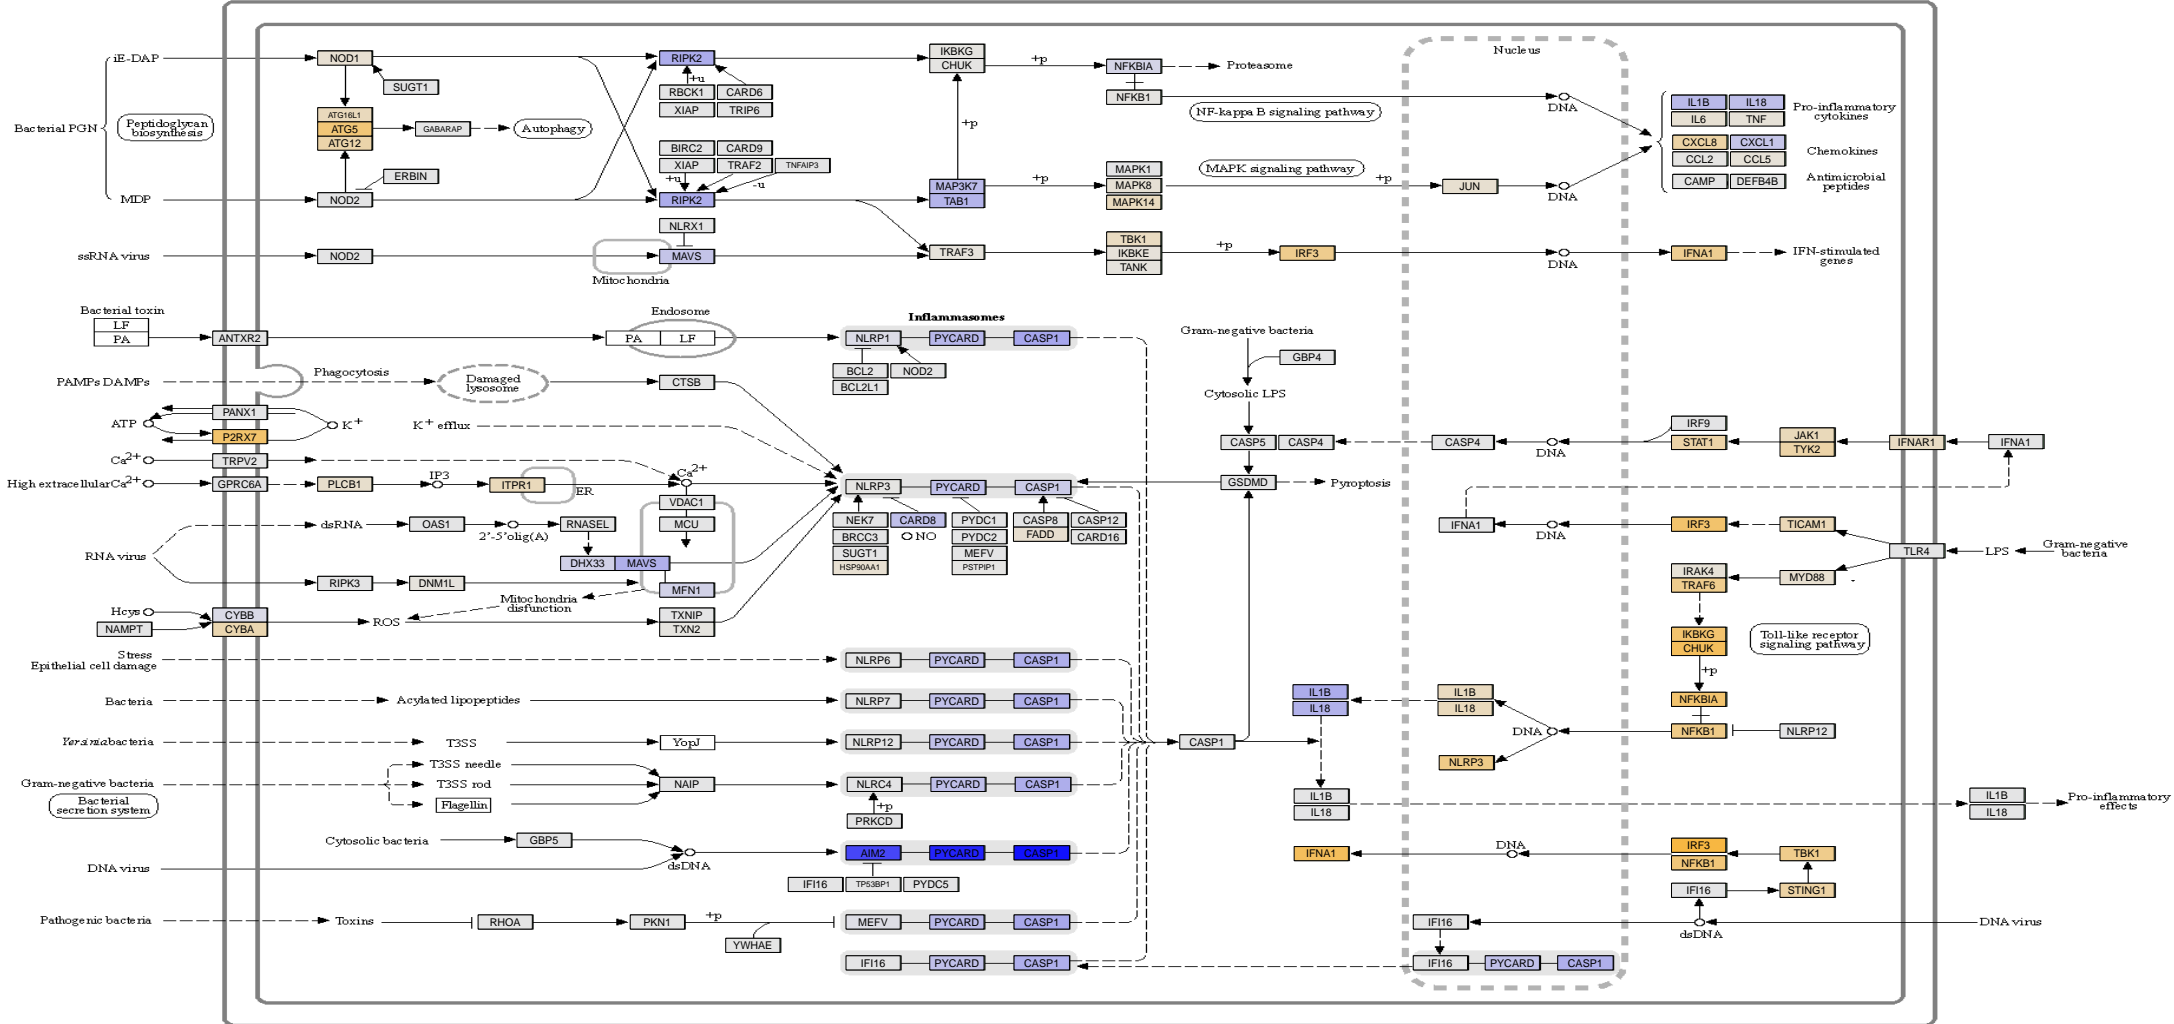

# NOD-like receptor signaling pathway Adult

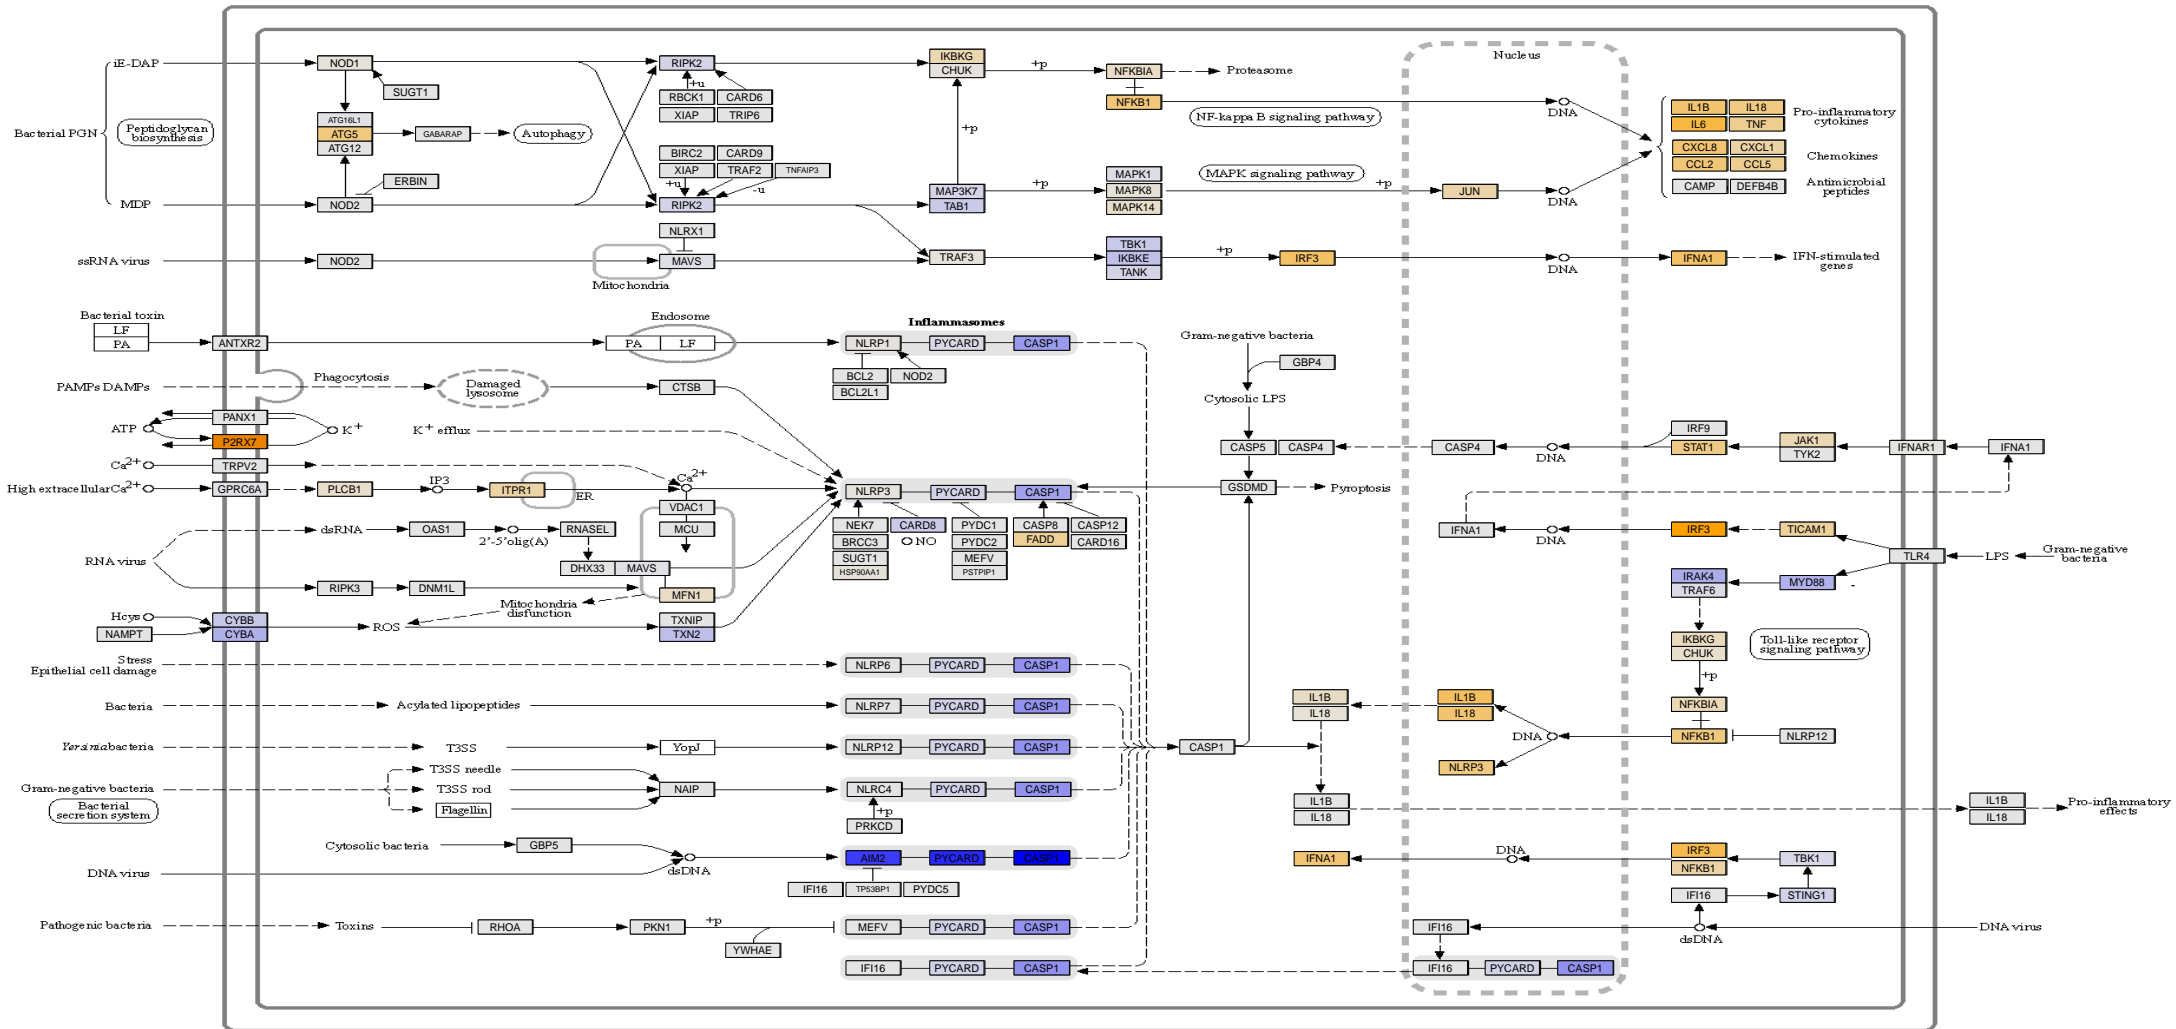



# NOD-like receptor signaling pathway Late Adult

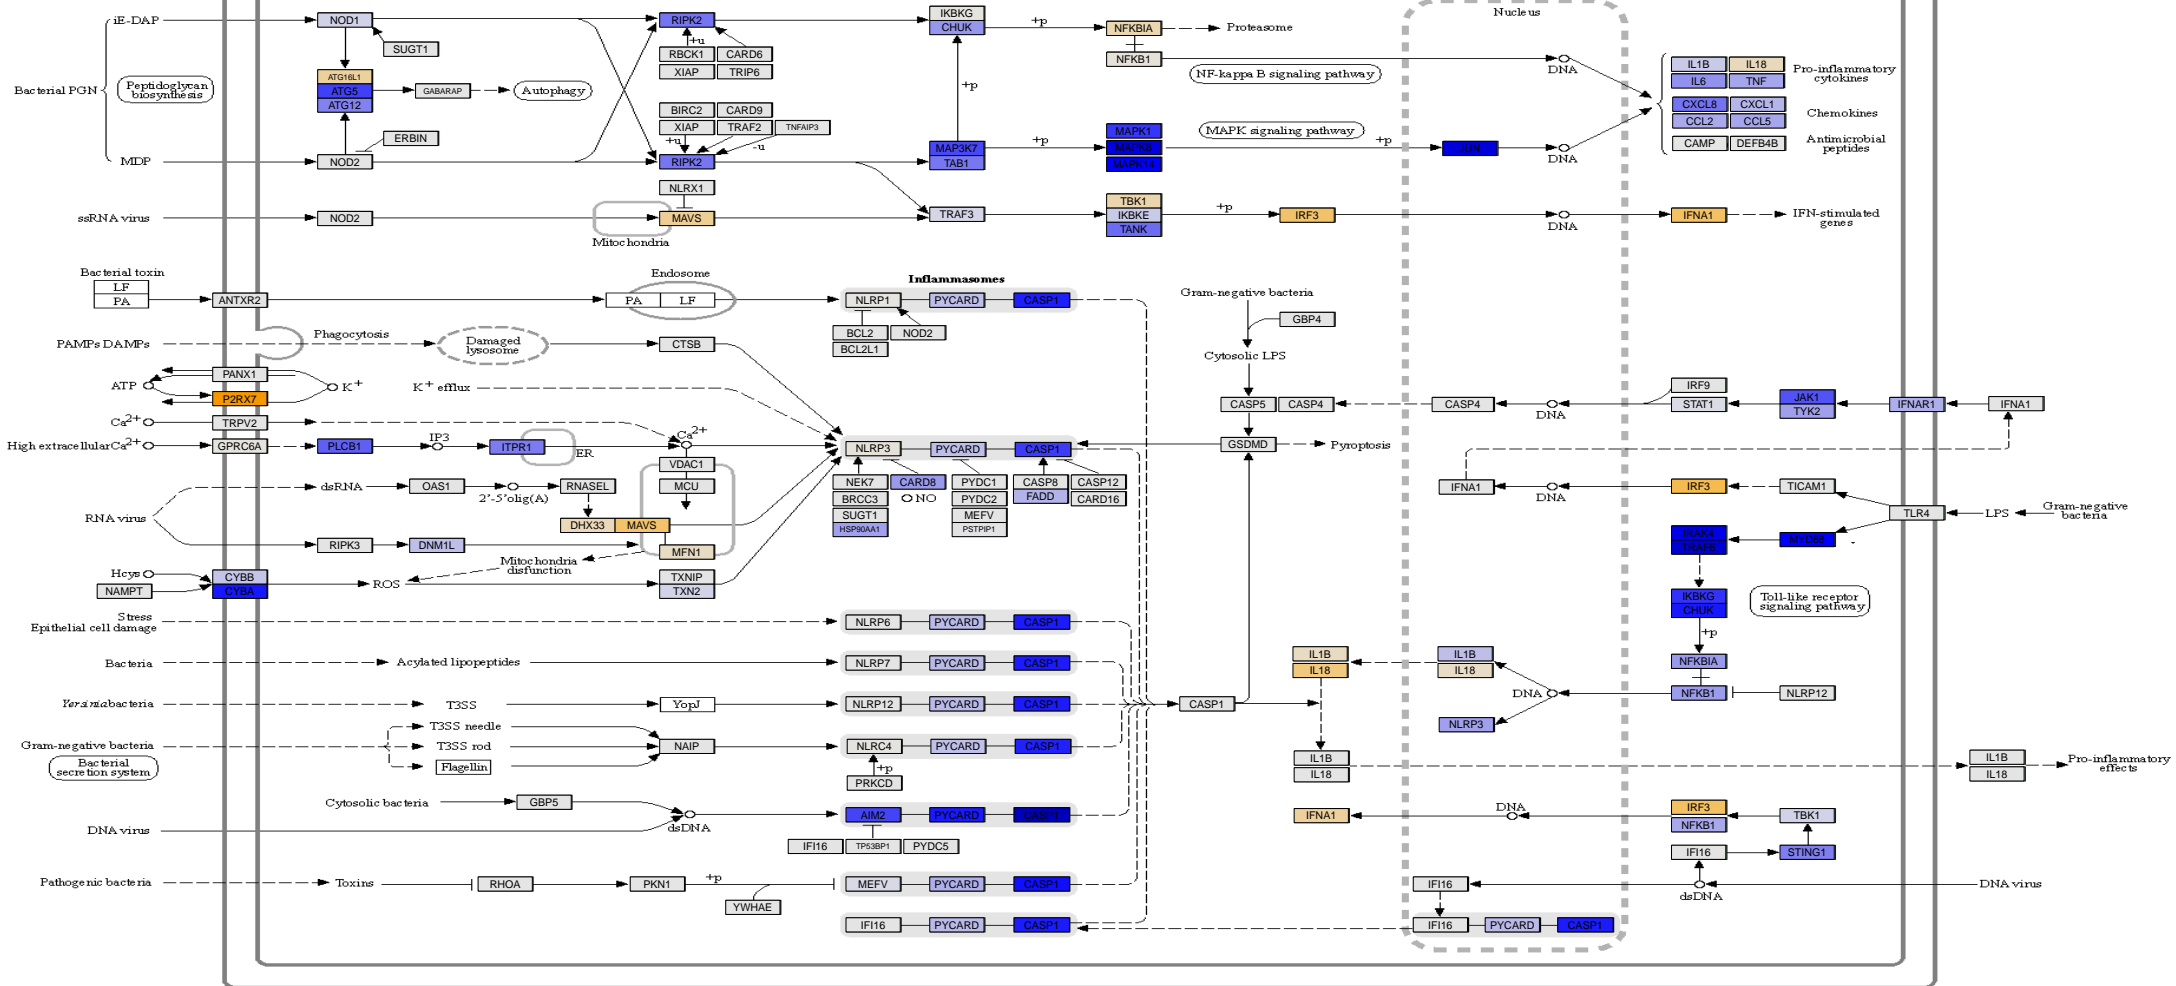

Supplement: s1 [file s1]
