# Supplementary material for: The Transcriptome and Methylome of the Developing and Aging Brain and Their Relations to Gliomas and Psychological Disorders
Source: MDPI journal article supplement (doi:10.3390/cells11030362), 2022-01-21

Adipocytokine signaling pathway

all genes

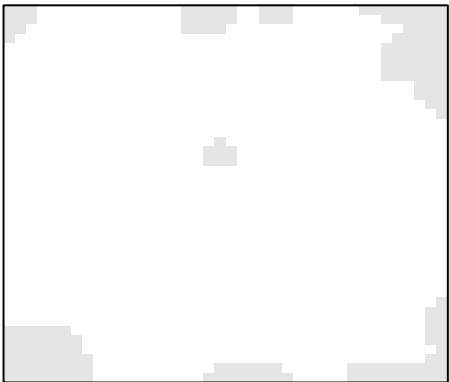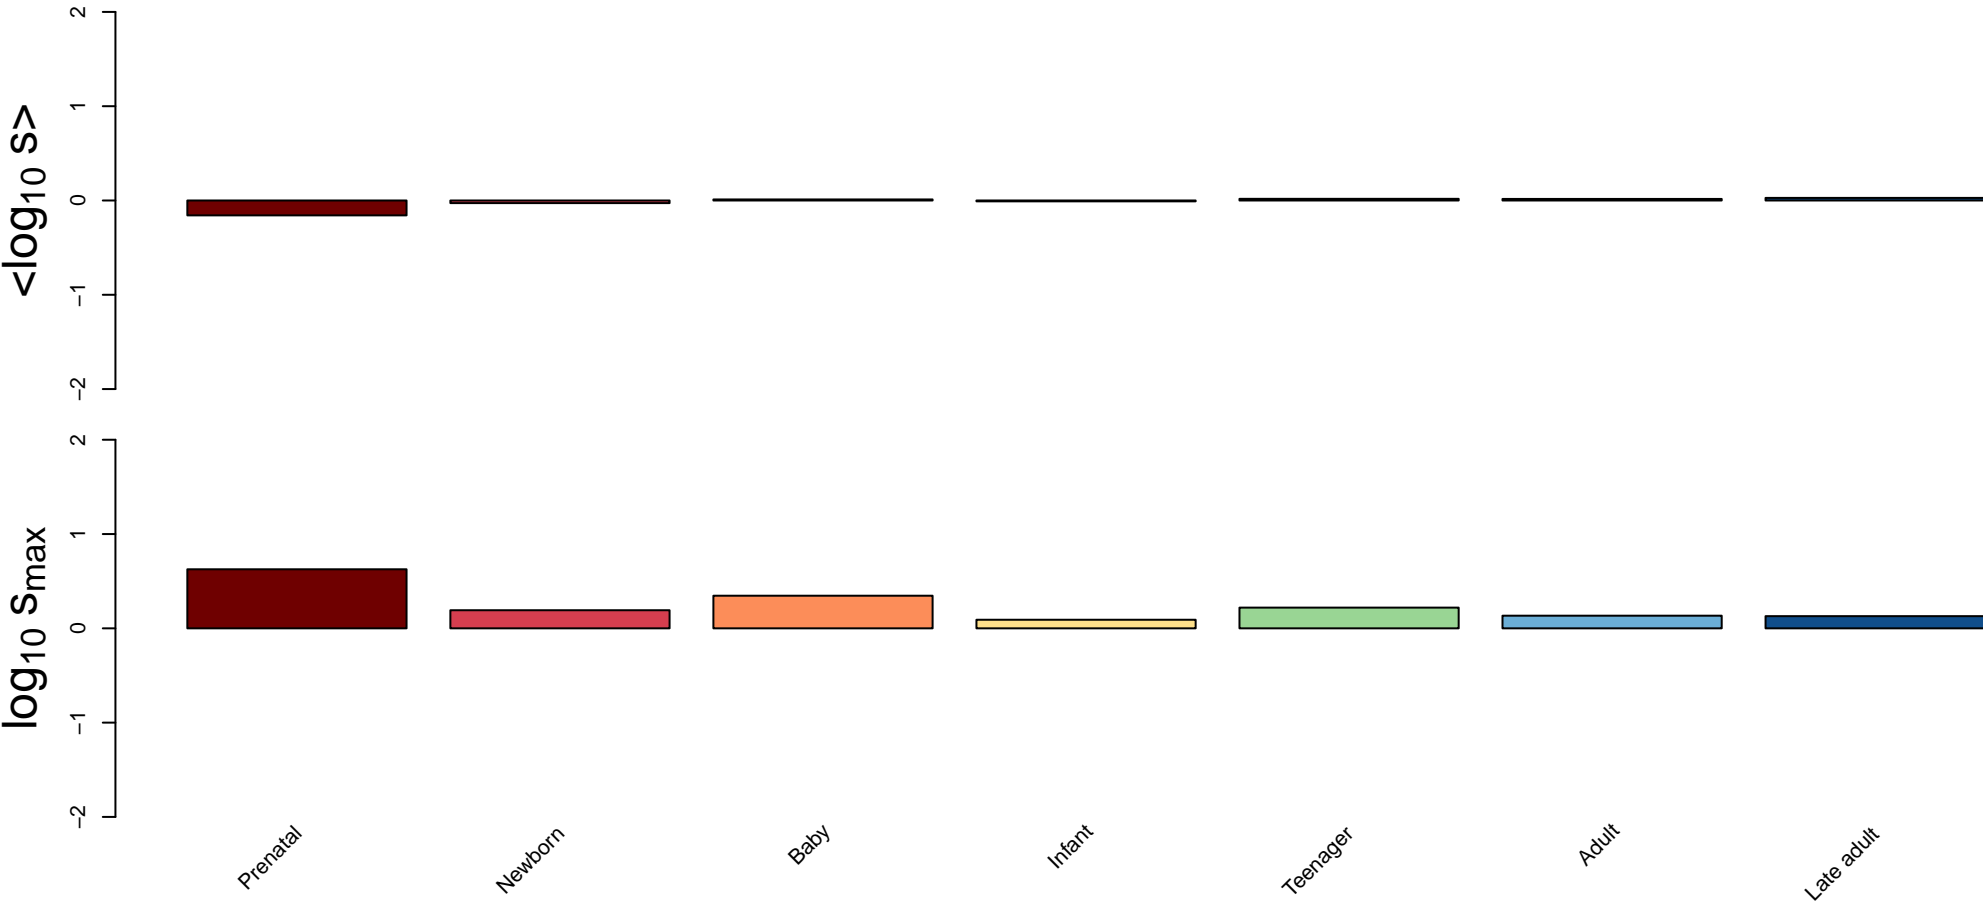

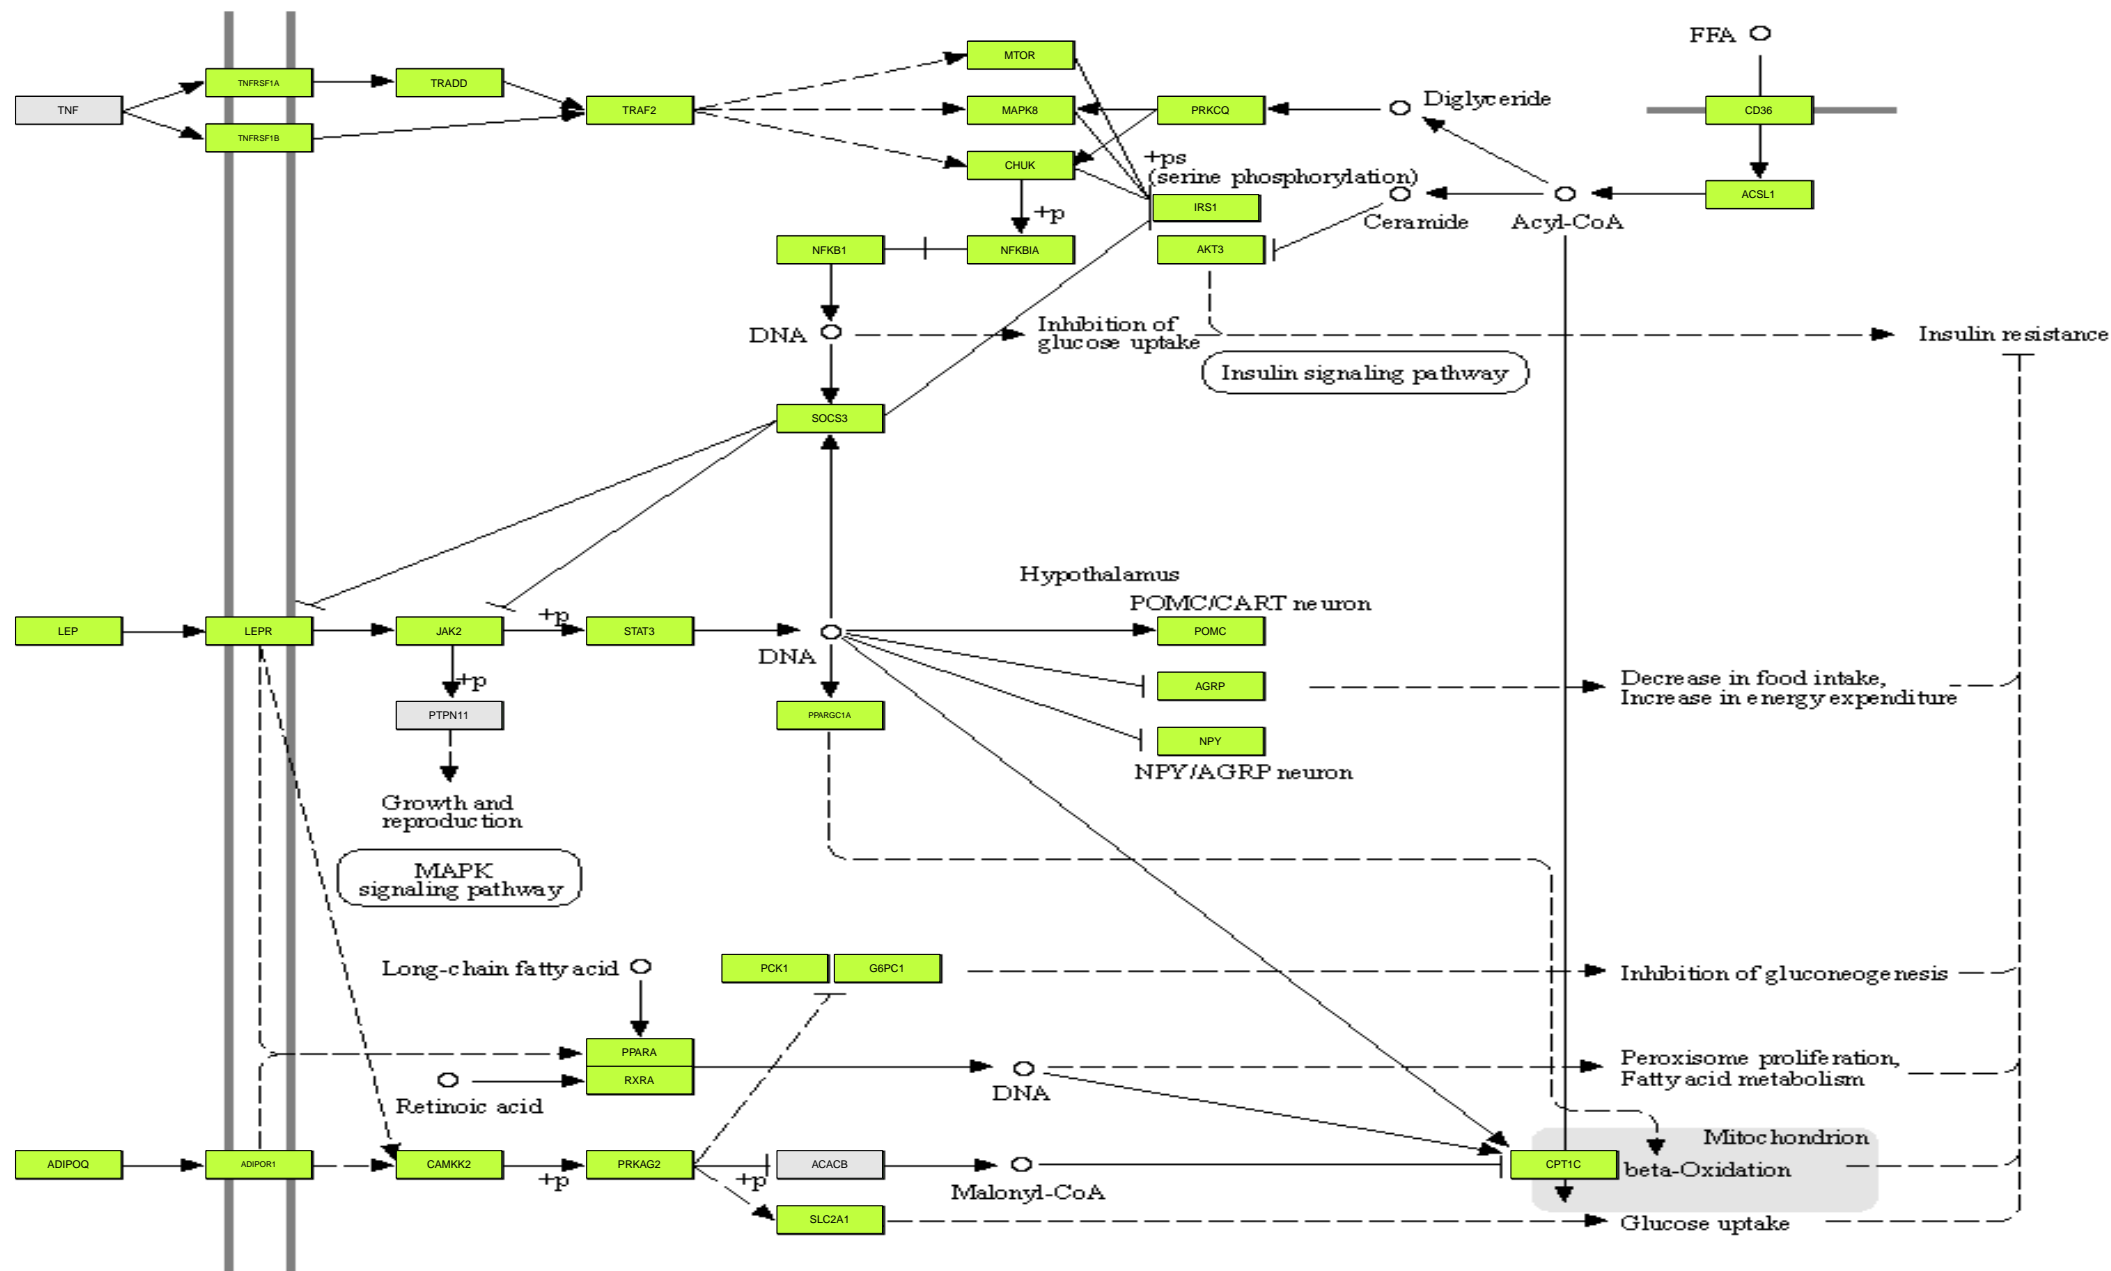

Adipocytokine\_signaling\_pathway  
sink nodes

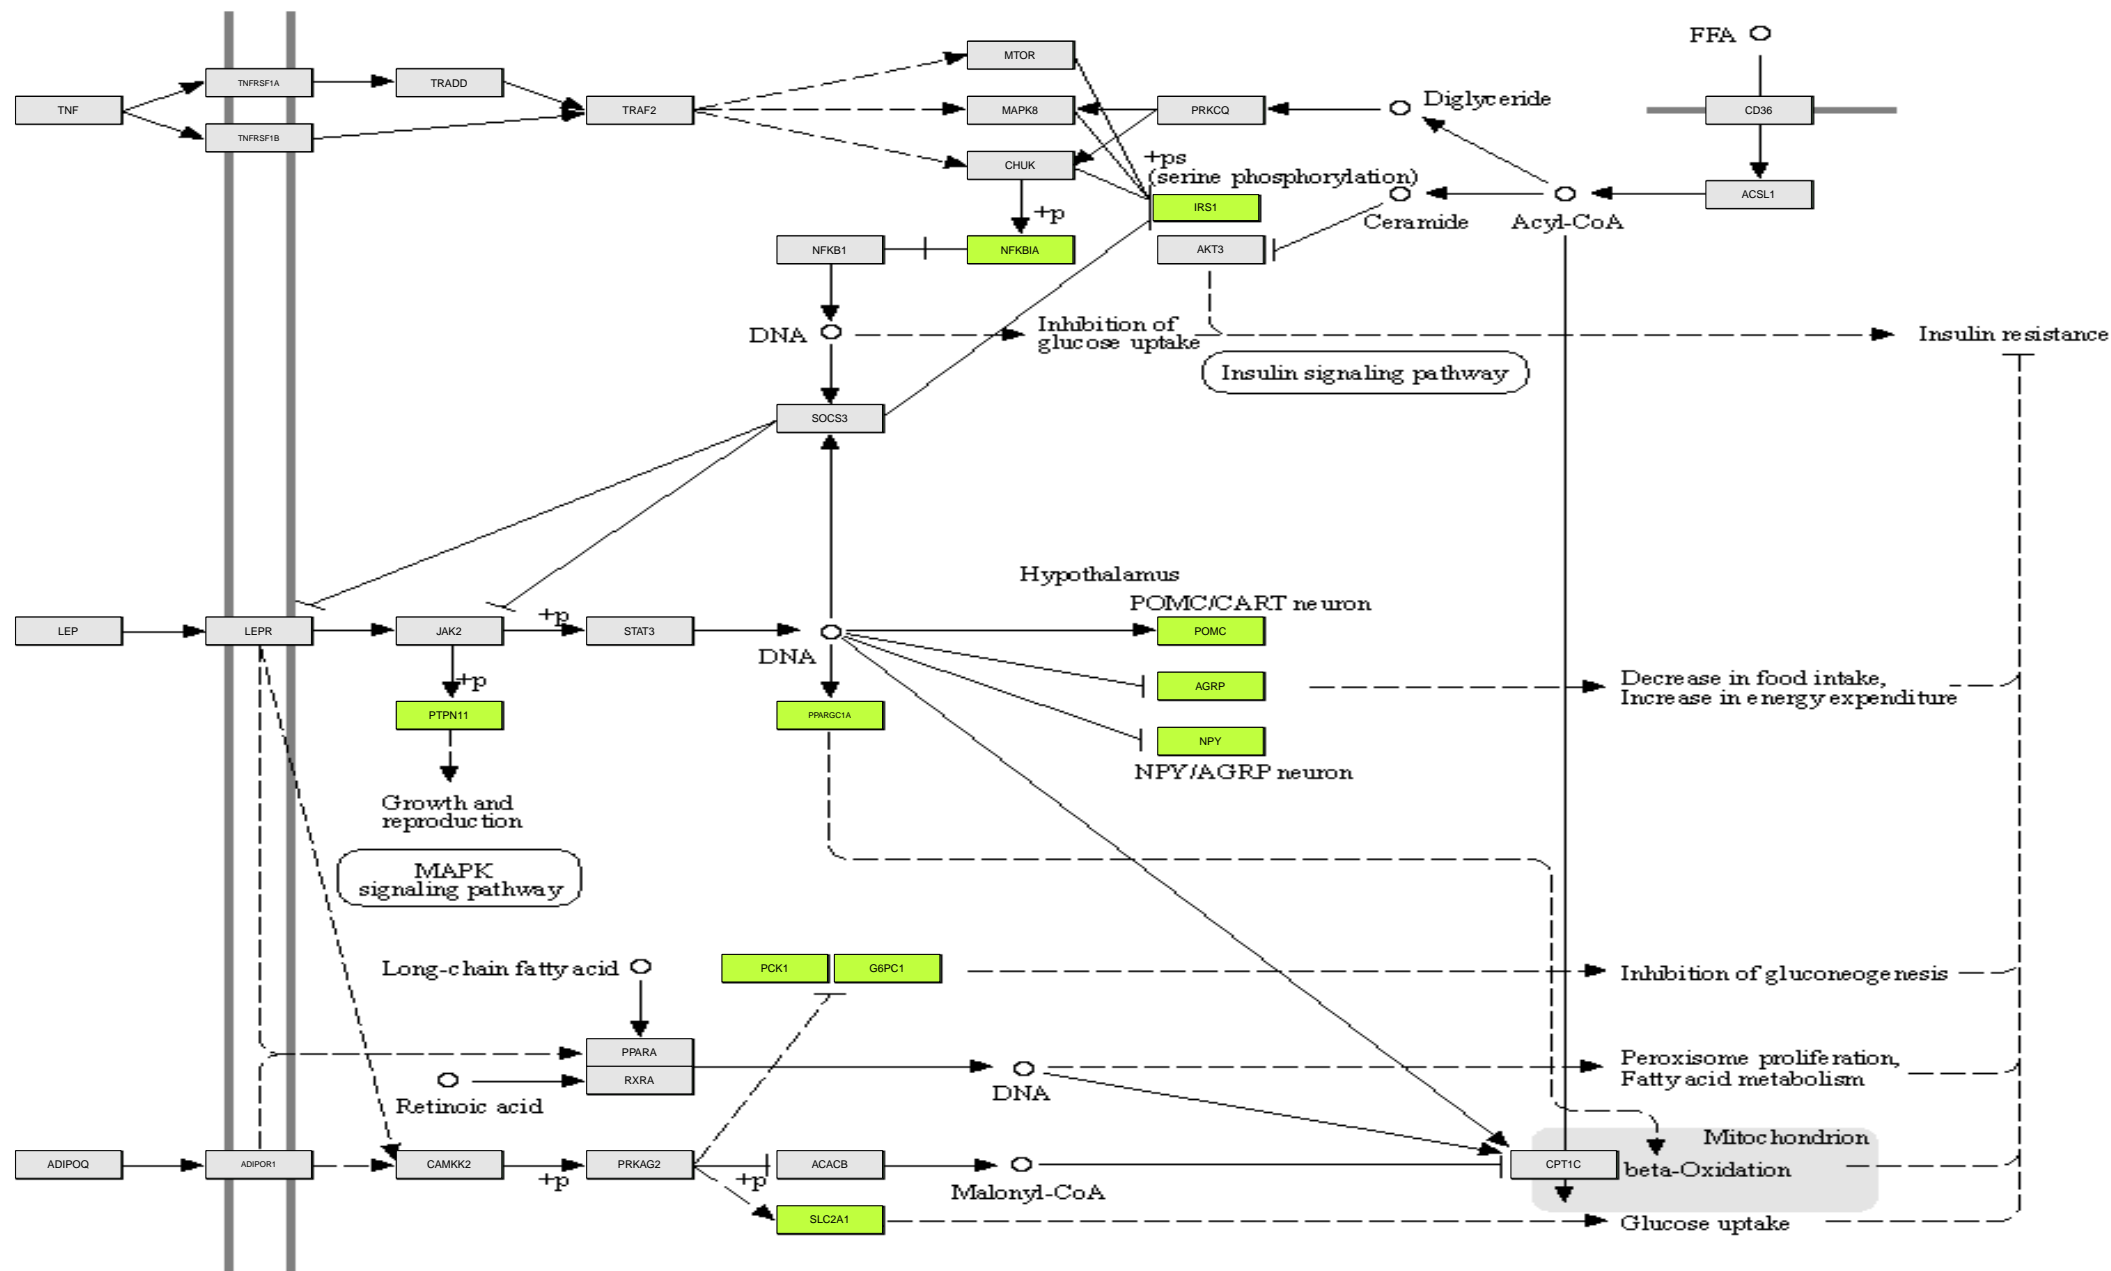

Adipocytokine\_signaling\_pathway  
Prenatal

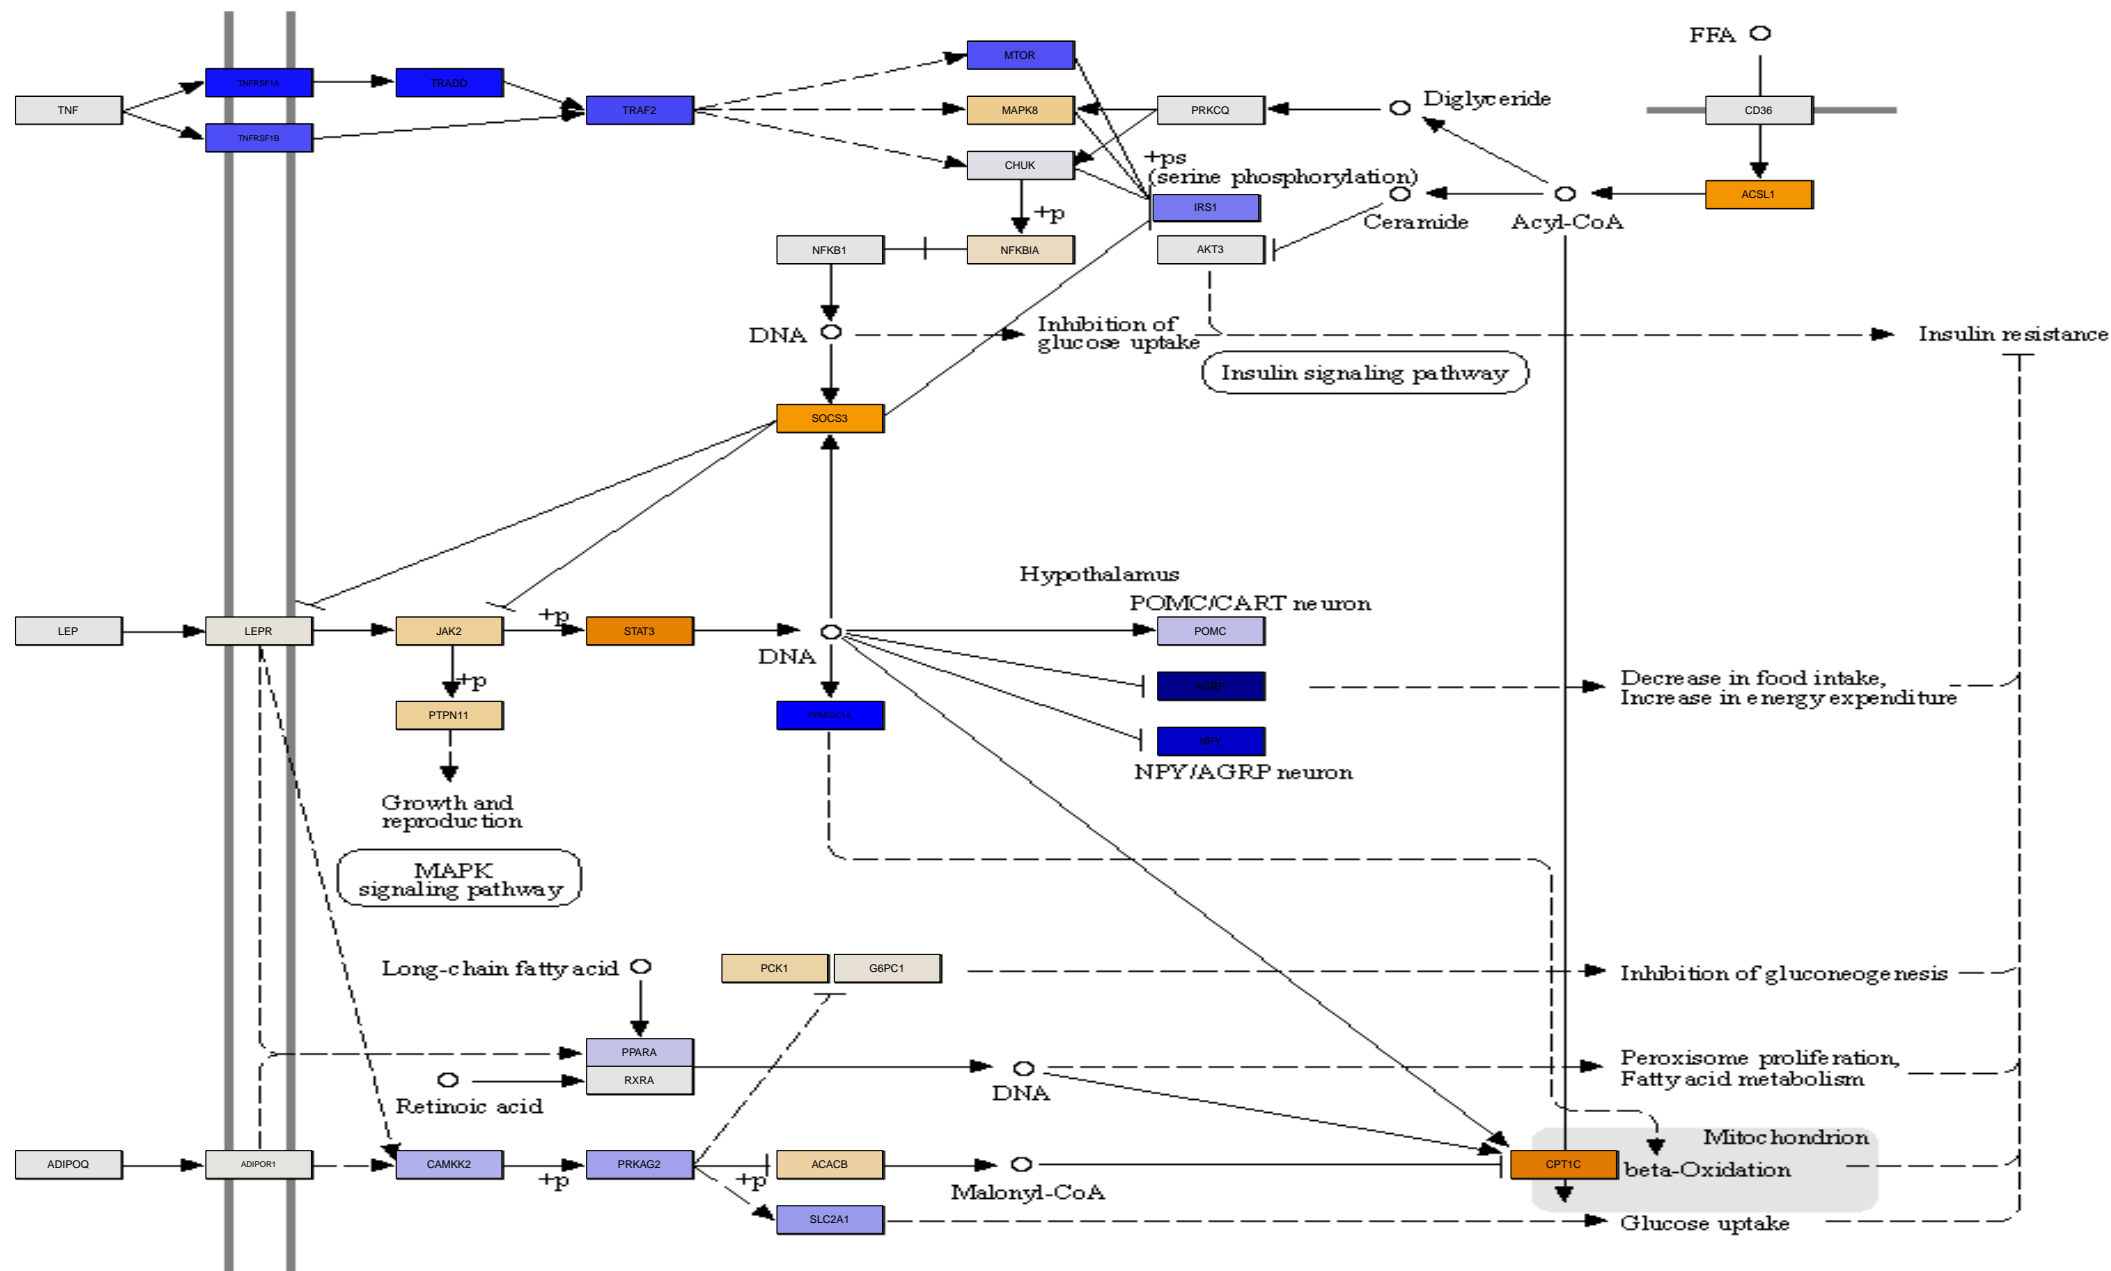

Adipocytokine\_signaling\_pathway  
Newborn

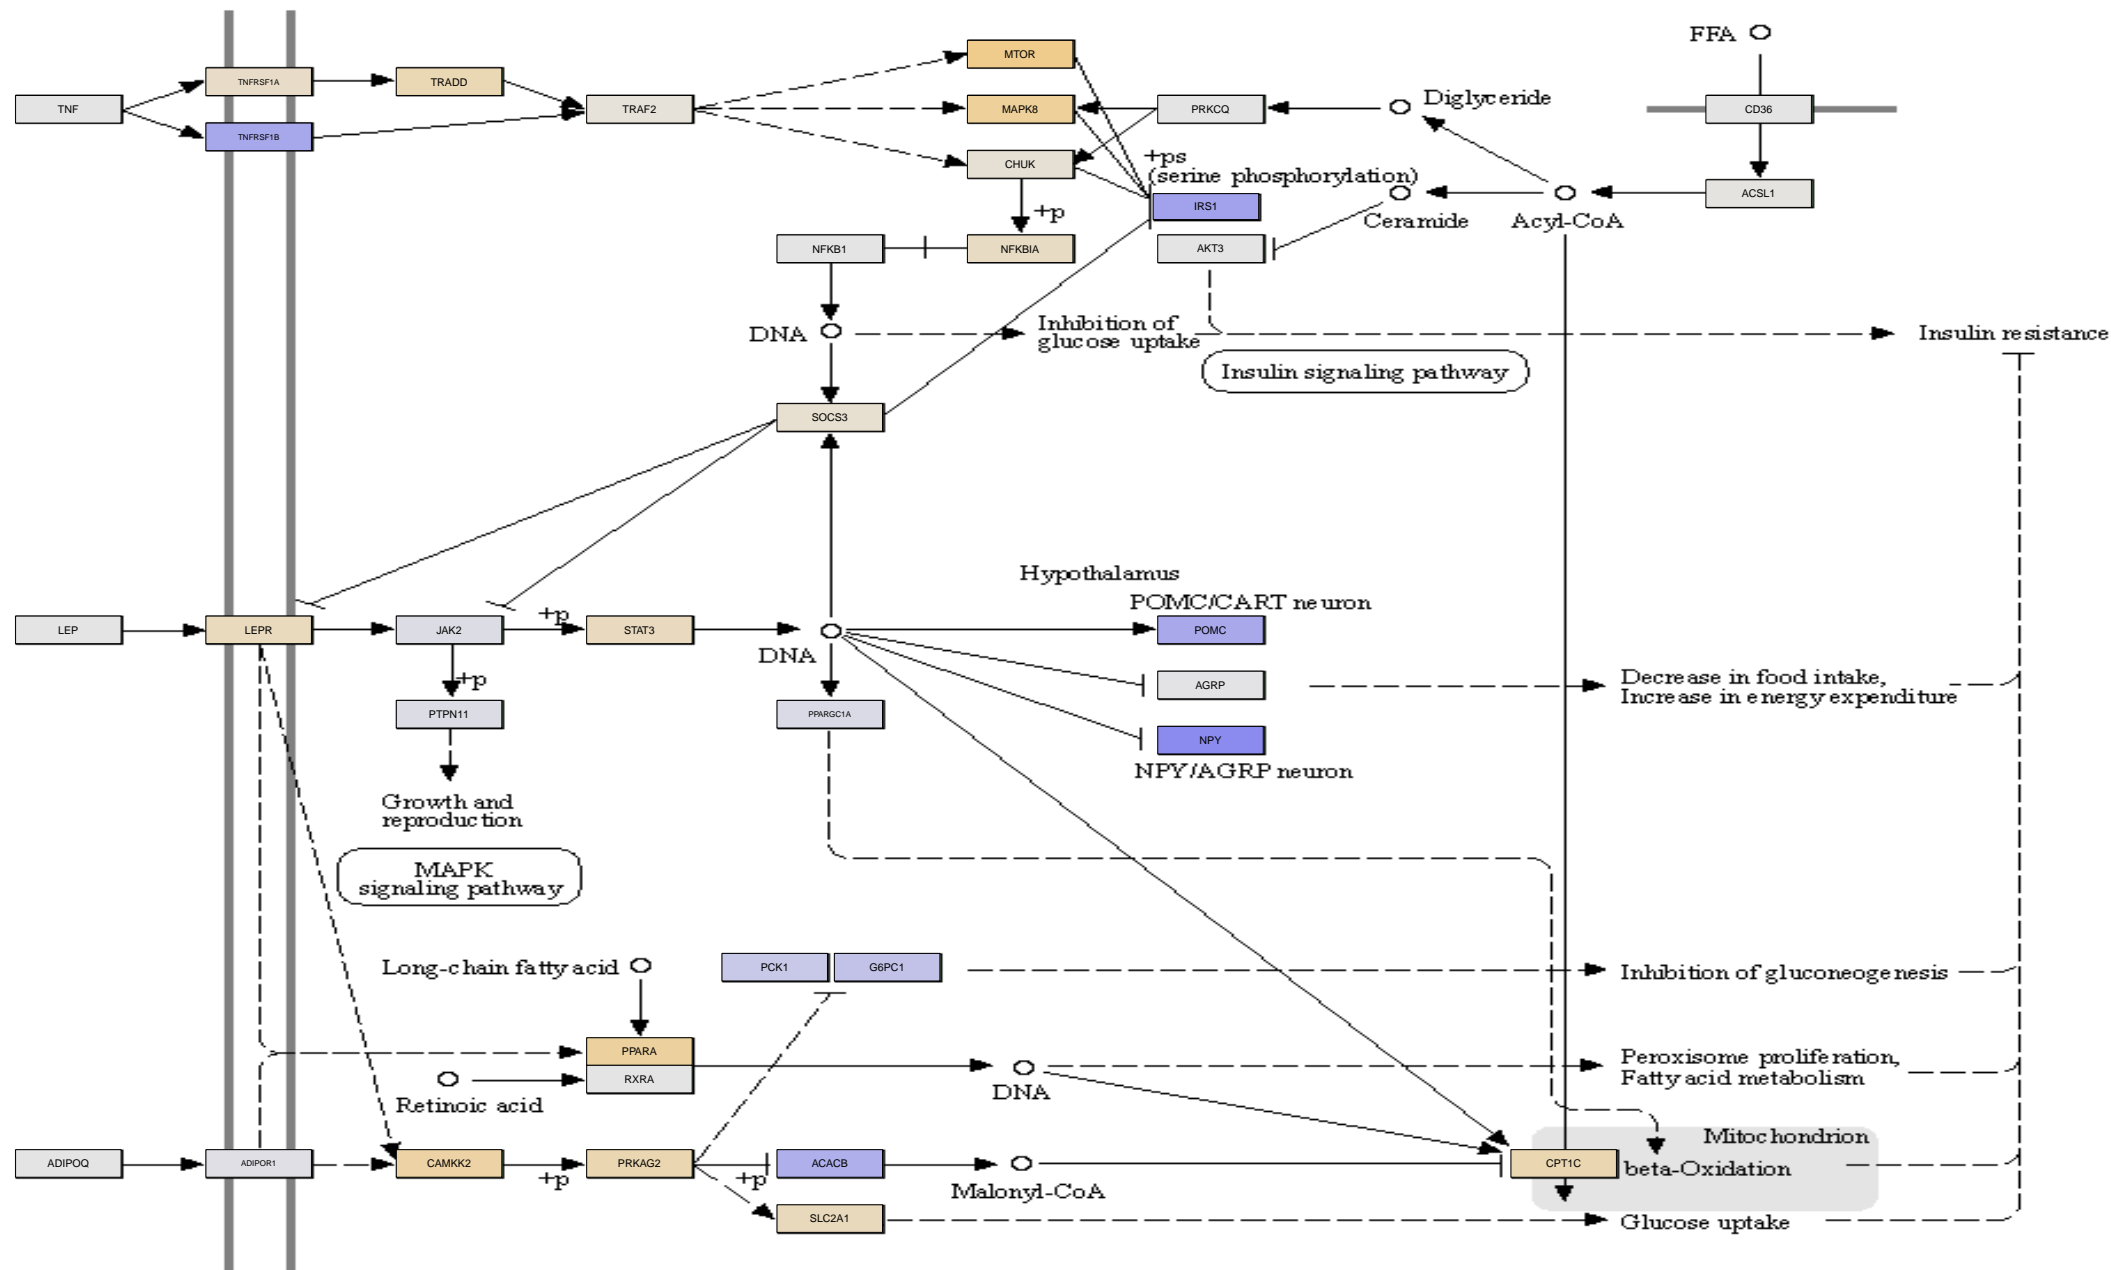

Adipocytokine\_signaling\_pathway  
Baby

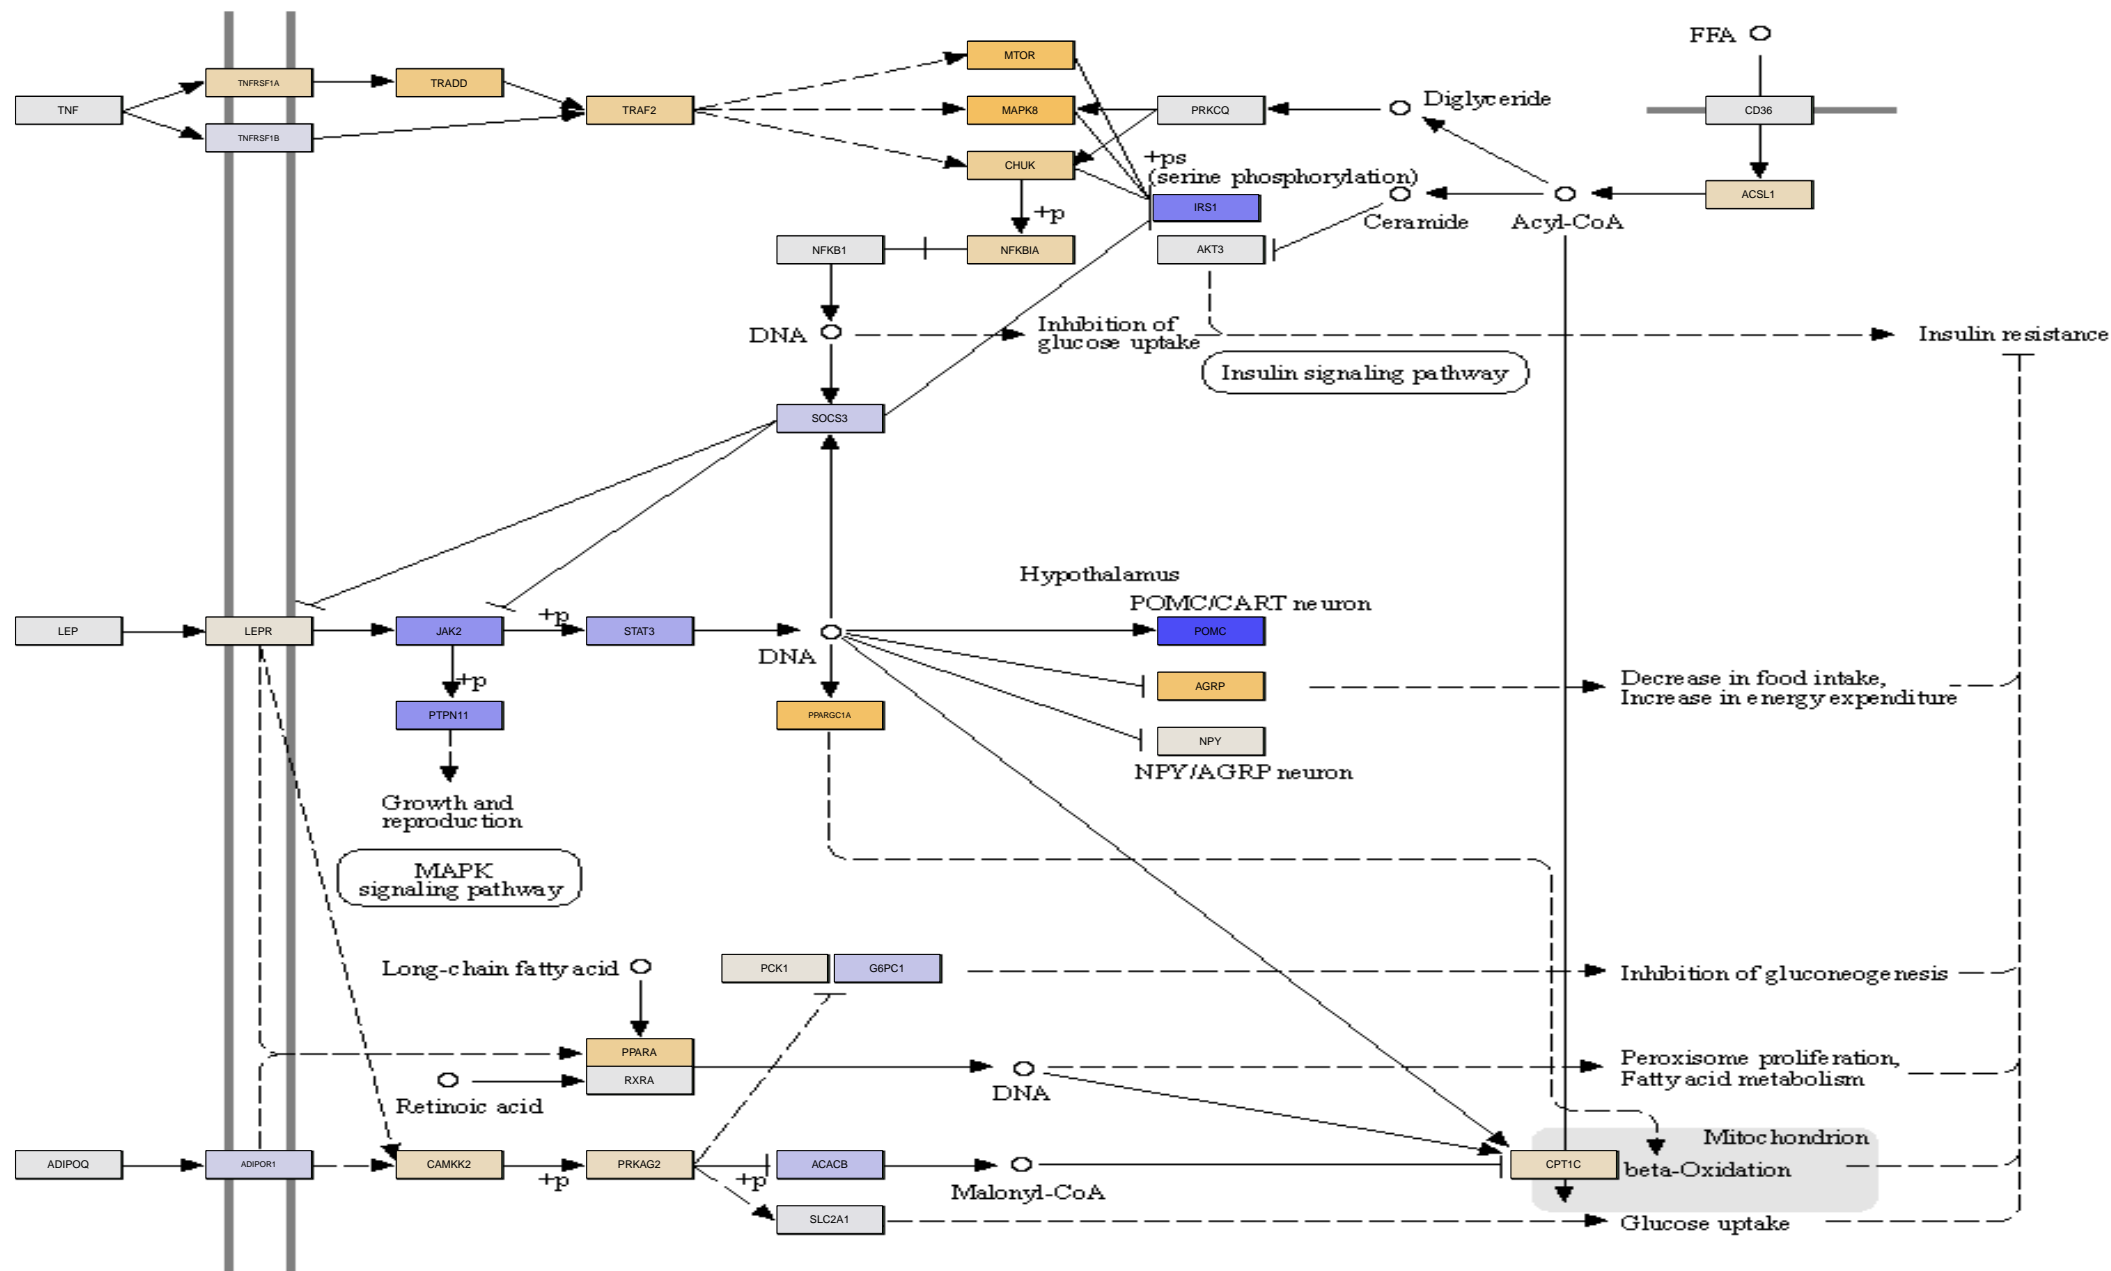

Adipocytokine\_signaling\_pathway  
Infant

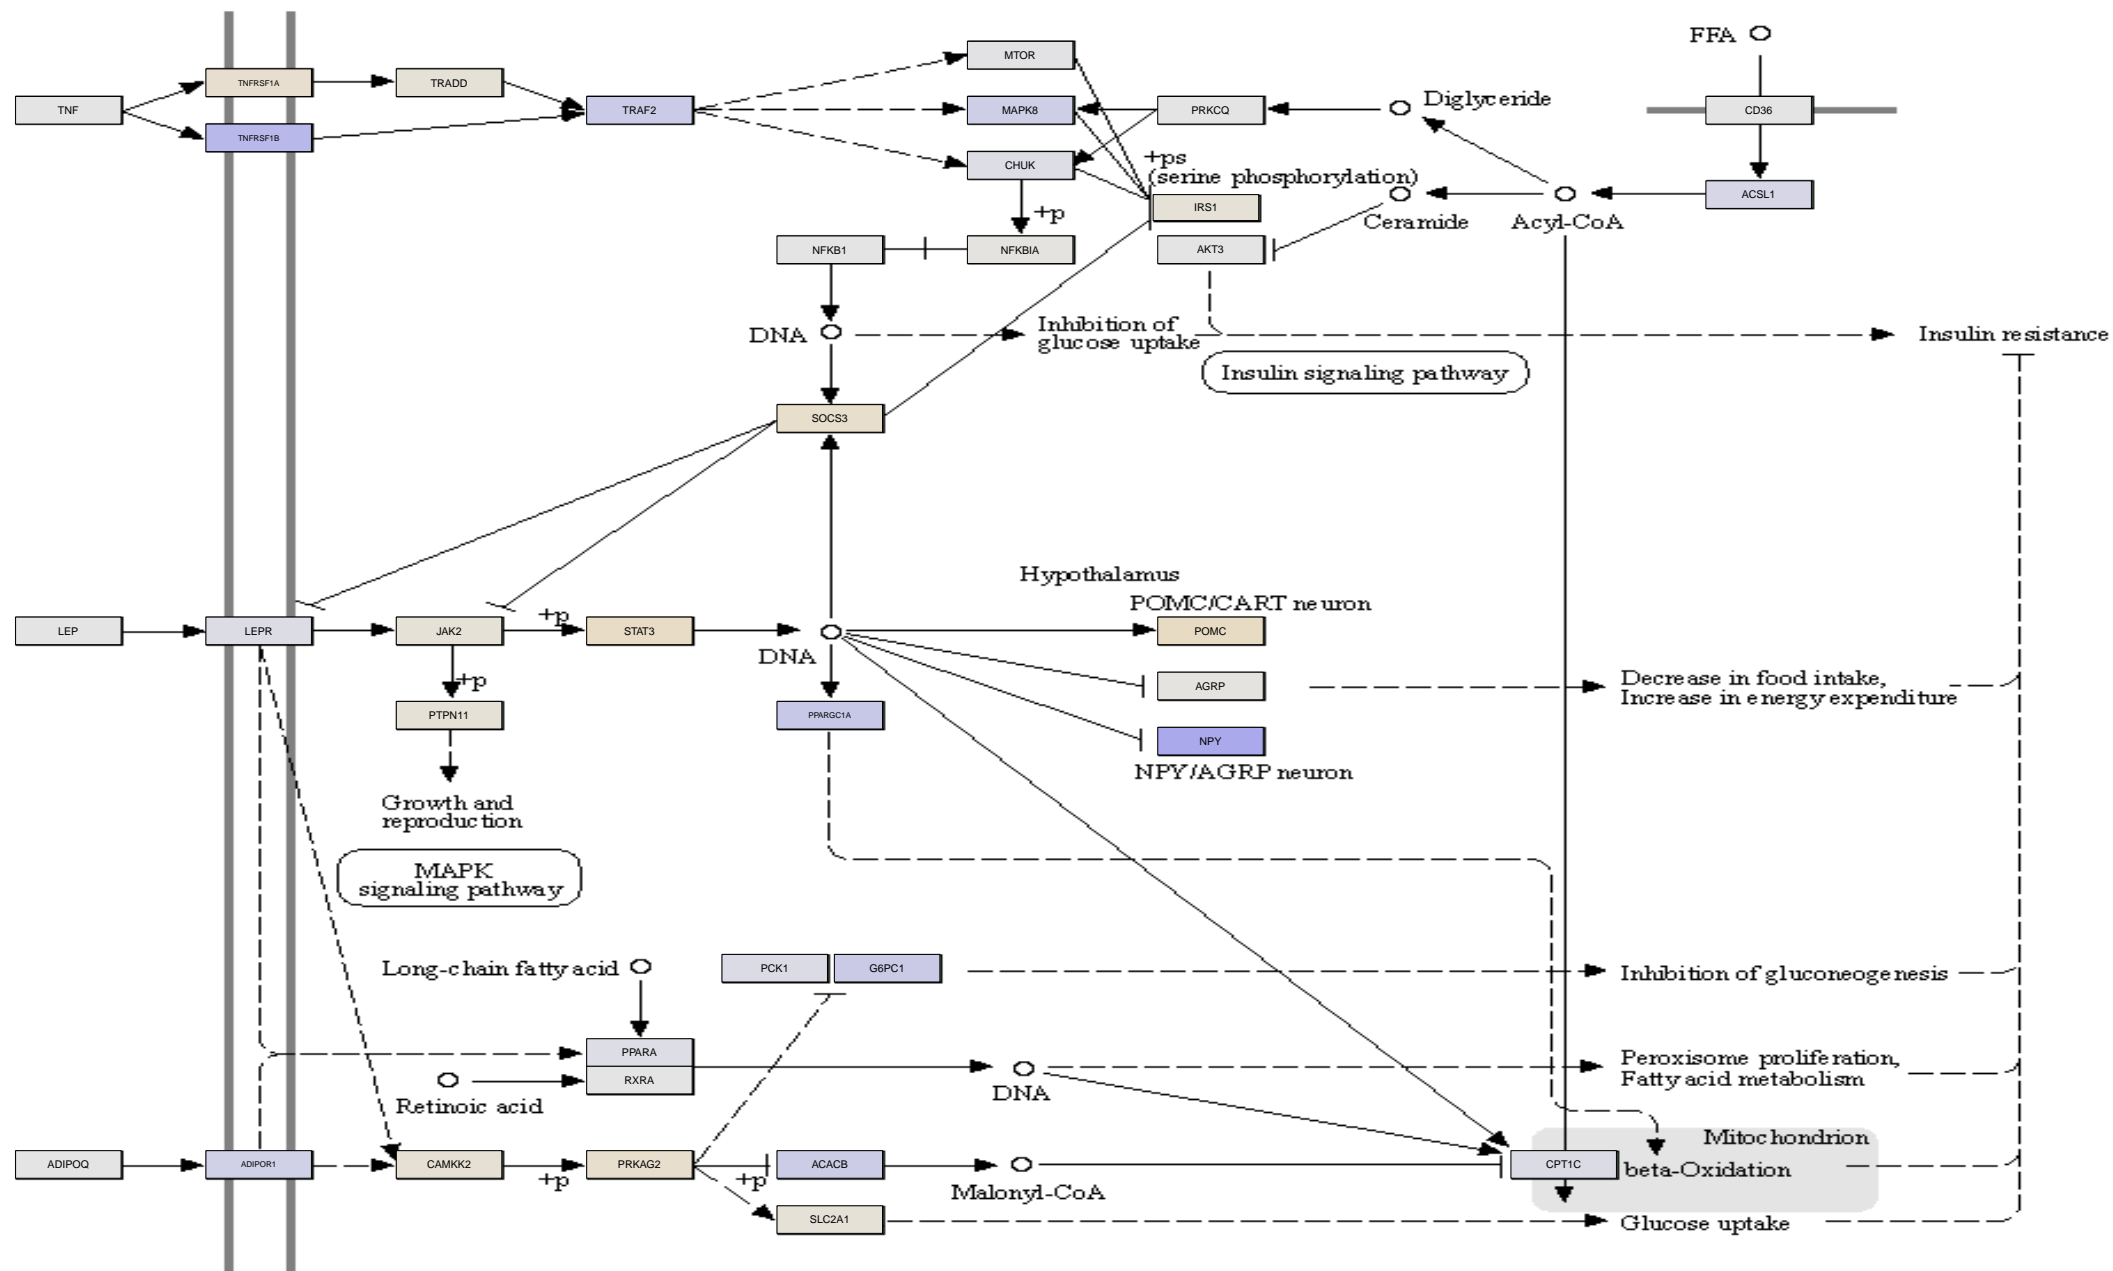

Adipocytokine\_signaling\_pathway  
Teenager

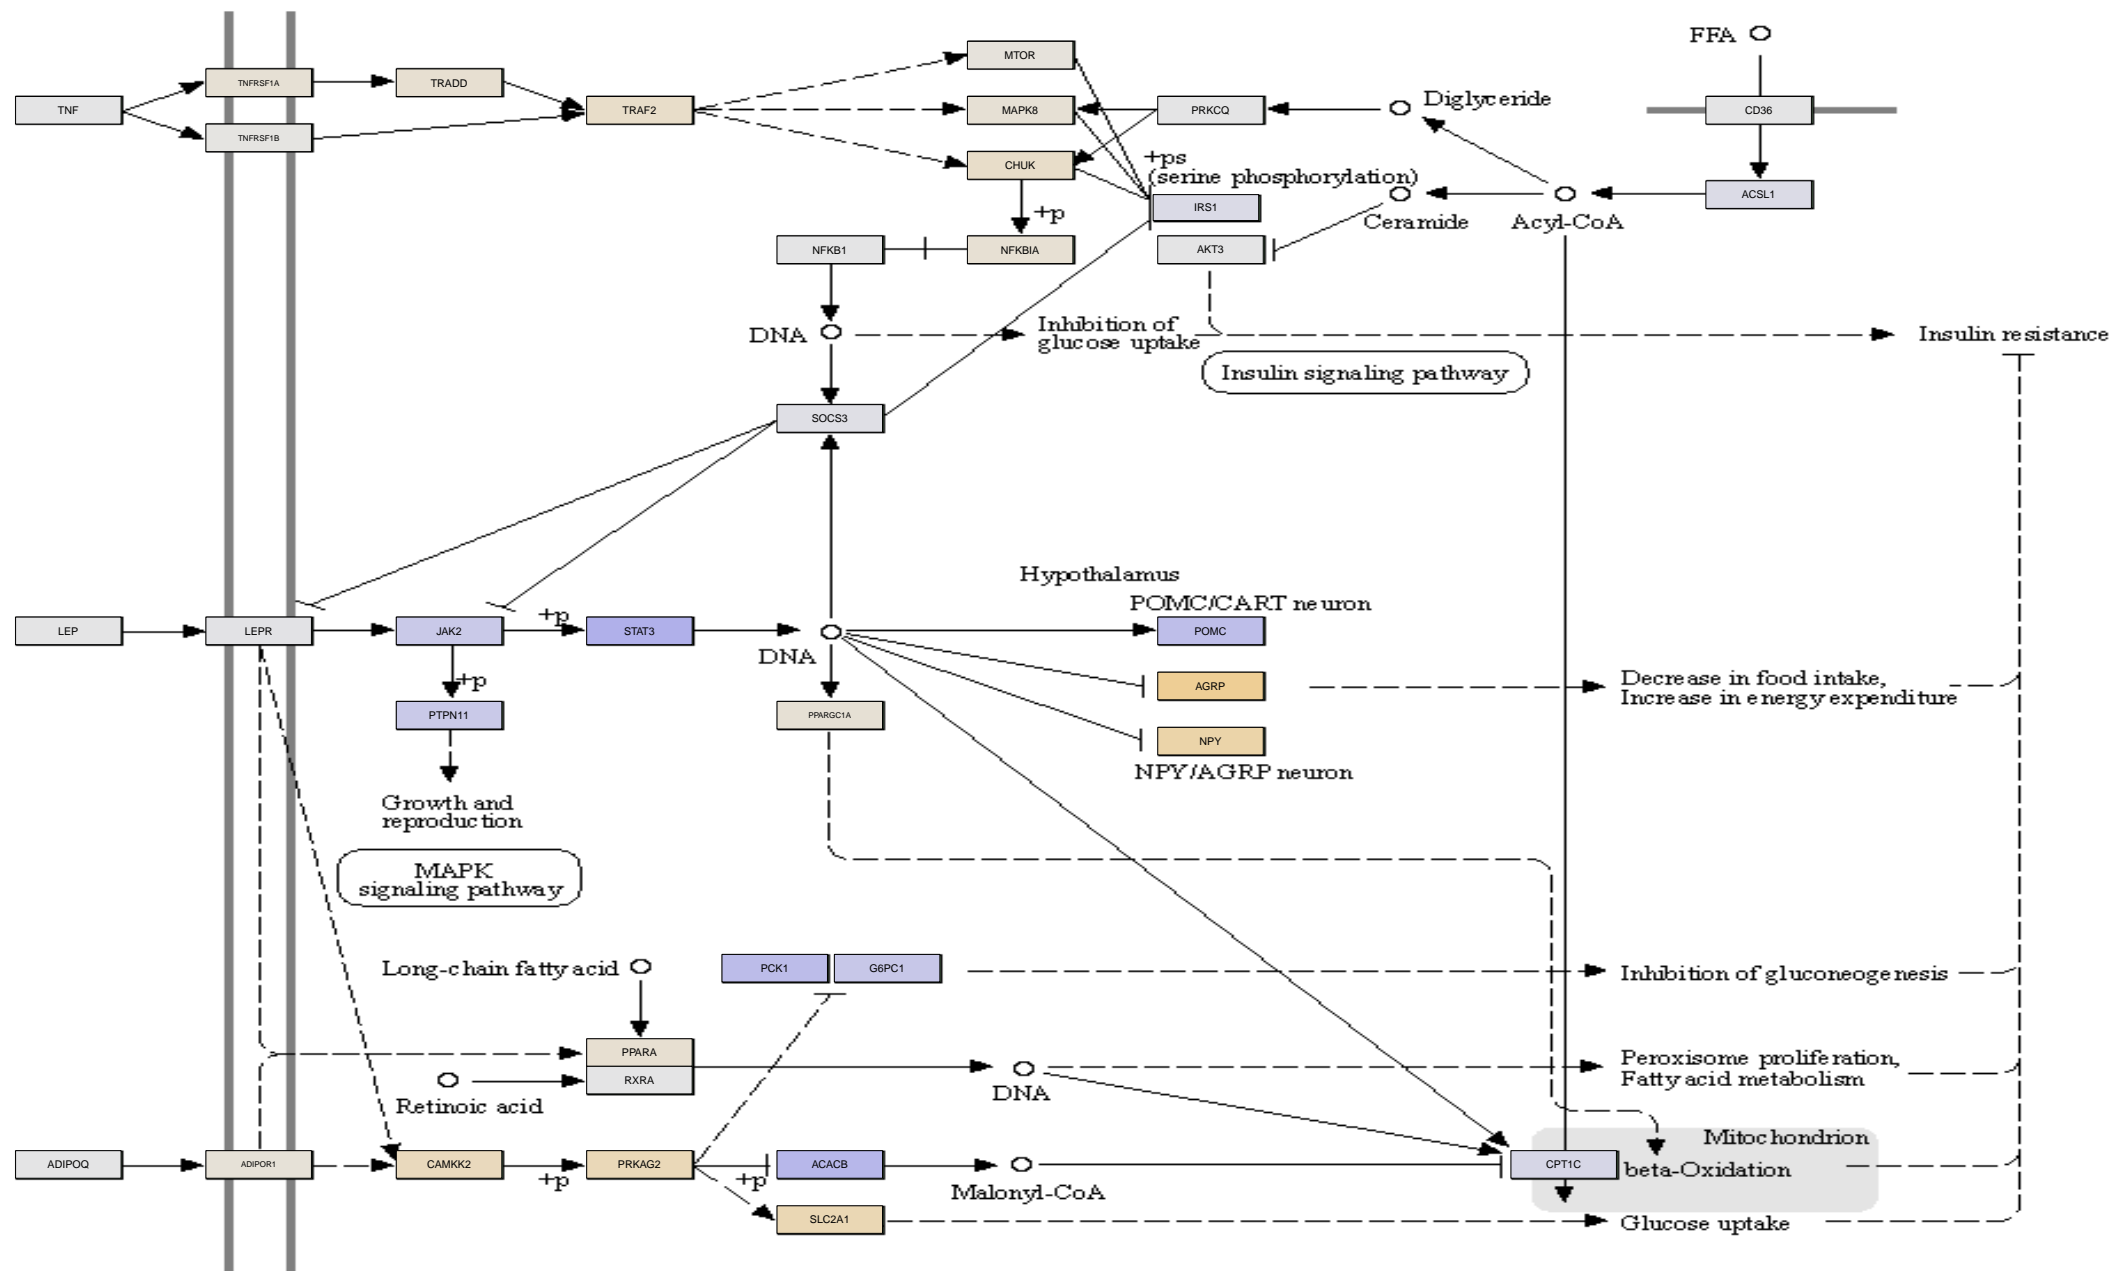



Adipocytokine\_signaling\_pathway  
Adult

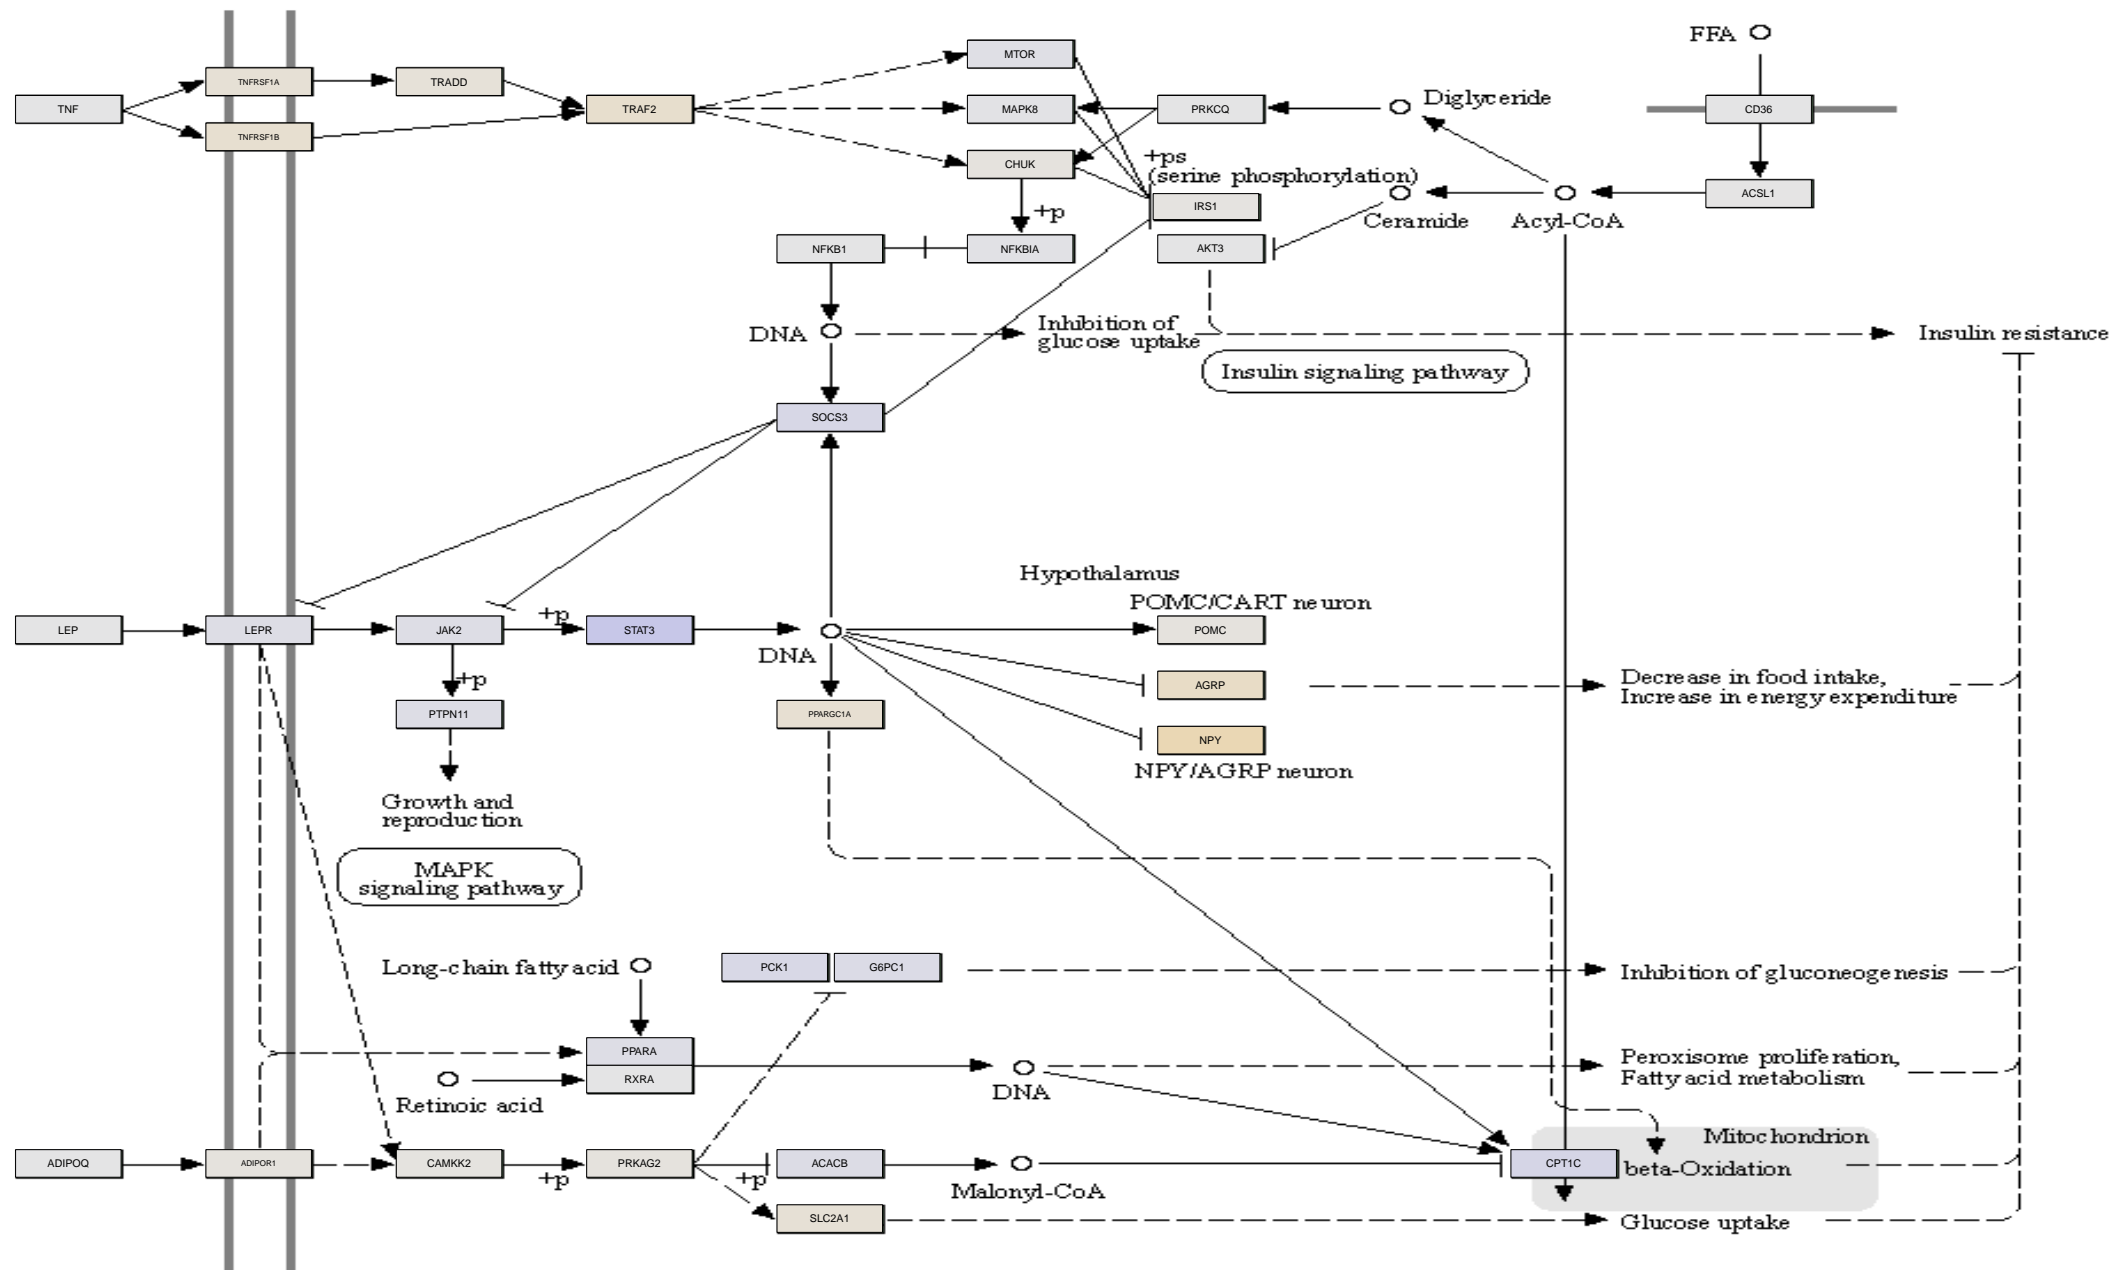

Adipocytokine\_signaling\_pathway  
Late adult

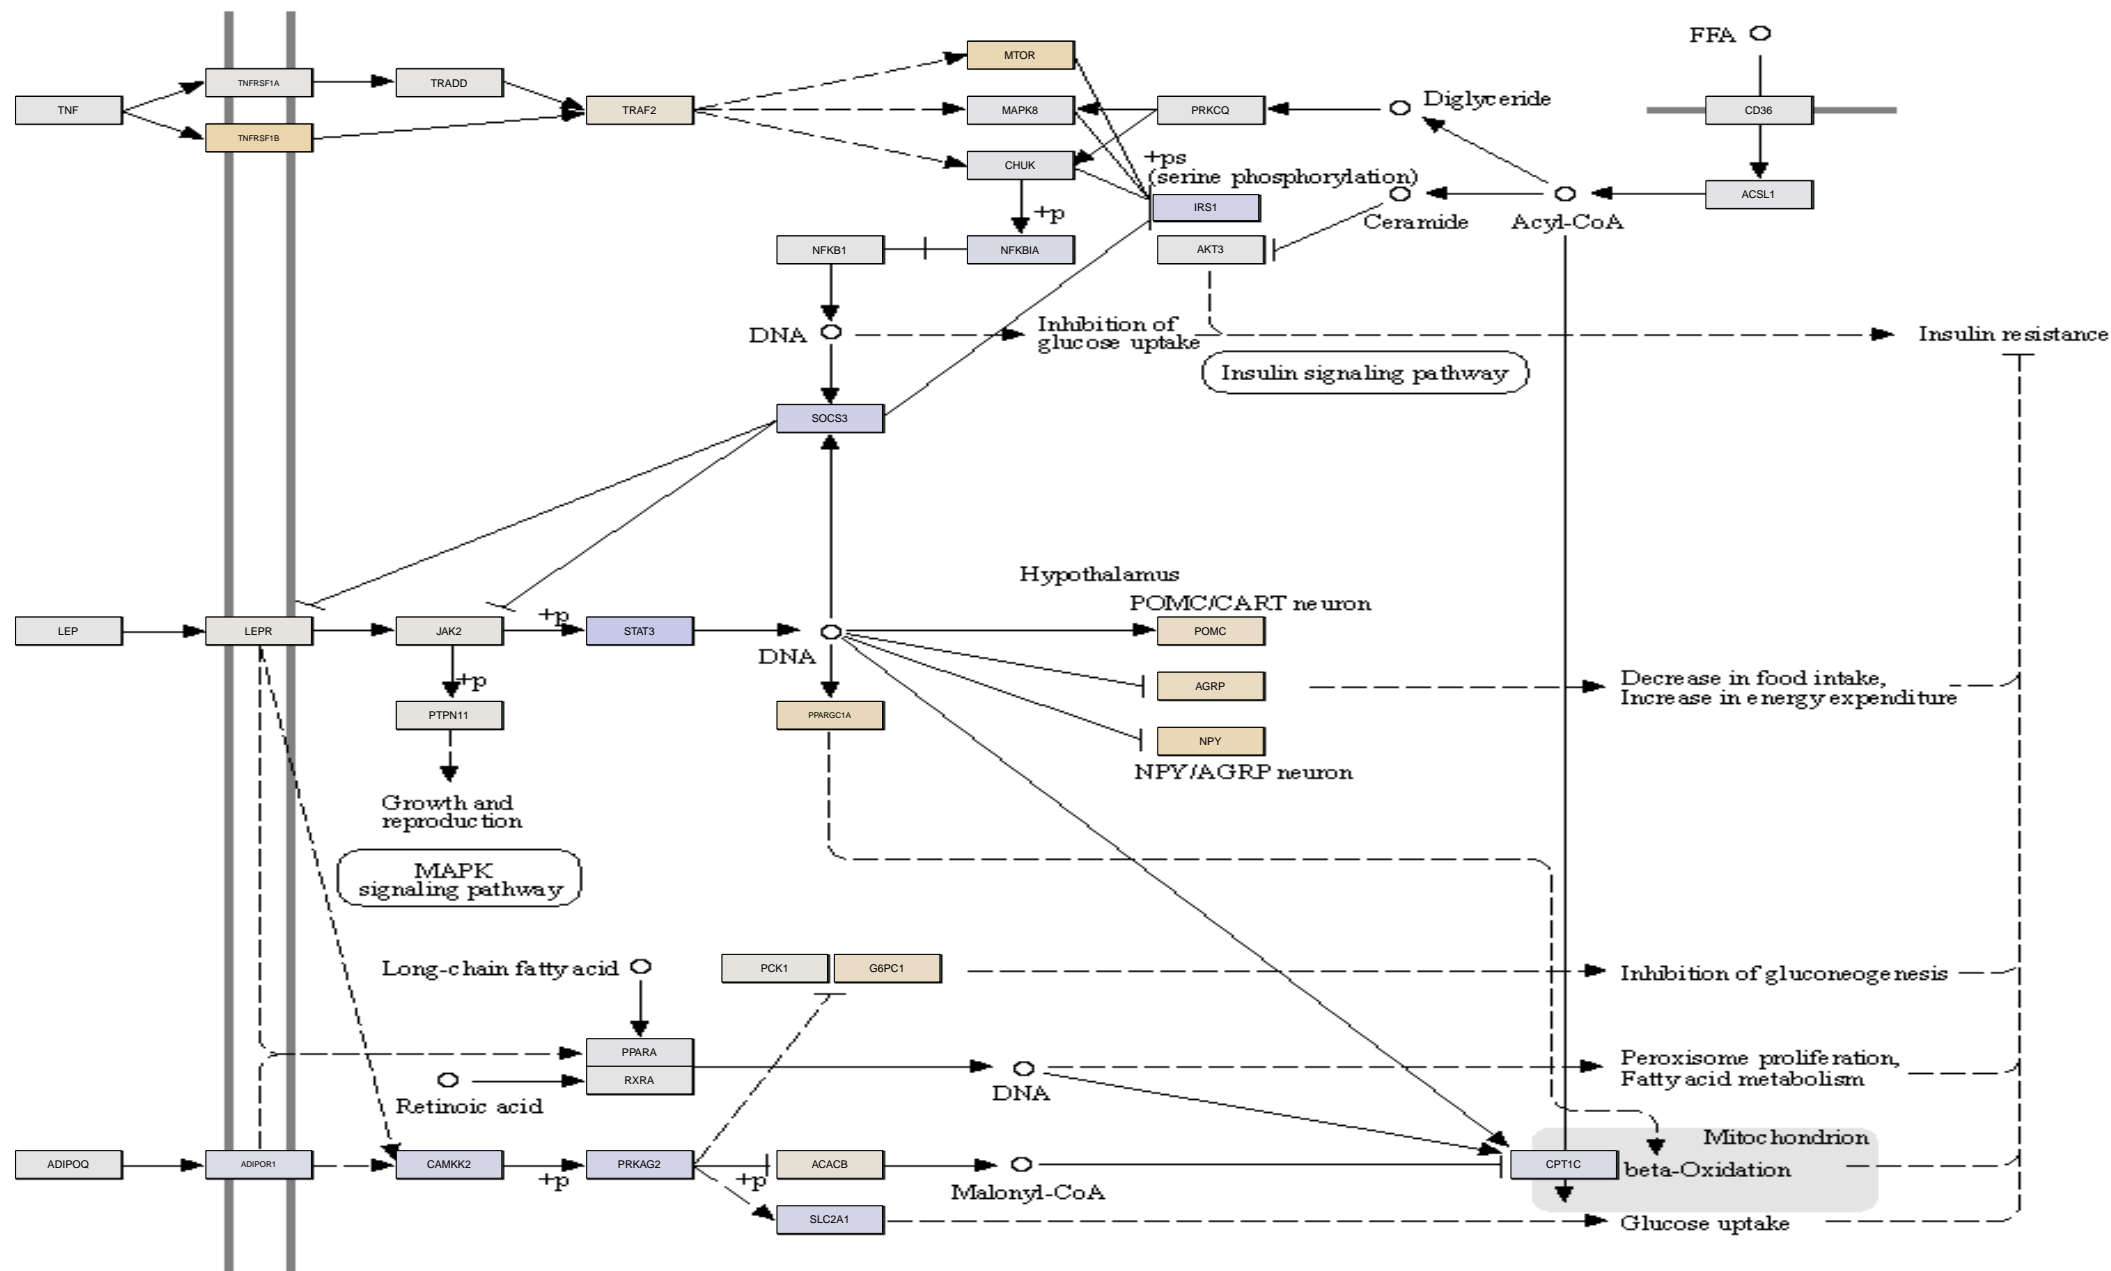

Supplement: s1 [file s1]
