# Supplementary material for: The Transcriptome and Methylome of the Developing and Aging Brain and Their Relations to Gliomas and Psychological Disorders
Source: Cells. 2022 Jan 21;11(3):362. doi: 10.3390/cells11030362 (PMC8834030; doi:10.3390/cells11030362)
Supplement: Supplementary file 1 [file cells-11-00362-s001.zip]

Archive with 109 entries (109 files):
- ReadMe.pdf
- Supplementary_Table_S1-Expression_Spots.csv
- Supplementary_Table-S2-Methylation_Spots.csv
- Suppl-Material-S3-Pathways-PSF_Expression/0verview Heatmaps.pdf
- Suppl-Material-S3-Pathways-PSF_Expression/0verview.html
- Suppl-Material-S3-Pathways-PSF_Expression/Adipocytokine_signaling_pathway.pdf
- Suppl-Material-S3-Pathways-PSF_Expression/Adrenergic_signaling_in_cardiomyocytes.pdf
- Suppl-Material-S3-Pathways-PSF_Expression/AGE_RAGE_signaling_pathway_in_diabetic_complications.pdf
- Suppl-Material-S3-Pathways-PSF_Expression/AMPK_signaling_pathway.pdf
- Suppl-Material-S3-Pathways-PSF_Expression/Apelin_signaling_pathway.pdf
- Suppl-Material-S3-Pathways-PSF_Expression/B_cell_receptor_signaling_pathway.pdf
- Suppl-Material-S3-Pathways-PSF_Expression/C_type_lectin_receptor_signaling_pathway.pdf
- Suppl-Material-S3-Pathways-PSF_Expression/Calcium_signaling_pathway.pdf
- Suppl-Material-S3-Pathways-PSF_Expression/cAMP_signaling_pathway.pdf
- Suppl-Material-S3-Pathways-PSF_Expression/cGMP_PKG_signaling_pathway.pdf
- Suppl-Material-S3-Pathways-PSF_Expression/Chemokine_signaling_pathway.pdf
- Suppl-Material-S3-Pathways-PSF_Expression/Epithelial_cell_signaling_in_Helicobacter_pylori_infection.pdf
- Suppl-Material-S3-Pathways-PSF_Expression/ErbB_signaling_pathway.pdf
- Suppl-Material-S3-Pathways-PSF_Expression/Estrogen_signaling_pathway.pdf
- Suppl-Material-S3-Pathways-PSF_Expression/Fc_epsilon_RI_signaling_pathway.pdf
- Suppl-Material-S3-Pathways-PSF_Expression/FoxO_signaling_pathway.pdf
- Suppl-Material-S3-Pathways-PSF_Expression/Glucagon_signaling_pathway.pdf
- Suppl-Material-S3-Pathways-PSF_Expression/GnRH_signaling_pathway.pdf
- Suppl-Material-S3-Pathways-PSF_Expression/Hedgehog_signaling_pathway.pdf
- Suppl-Material-S3-Pathways-PSF_Expression/HIF_1_signaling_pathway.pdf
- Suppl-Material-S3-Pathways-PSF_Expression/Hippo_signaling_pathway.pdf
- Suppl-Material-S3-Pathways-PSF_Expression/Hippo_signaling_pathway_multiple_species.pdf
- Suppl-Material-S3-Pathways-PSF_Expression/IL_17_signaling_pathway.pdf
- Suppl-Material-S3-Pathways-PSF_Expression/Insulin_signaling_pathway.pdf
- Suppl-Material-S3-Pathways-PSF_Expression/JAK_STAT_signaling_pathway.pdf
- Suppl-Material-S3-Pathways-PSF_Expression/MAPK_signaling_pathway.pdf
- Suppl-Material-S3-Pathways-PSF_Expression/mTOR_signaling_pathway.pdf
- Suppl-Material-S3-Pathways-PSF_Expression/Neurotrophin_signaling_pathway.pdf
- Suppl-Material-S3-Pathways-PSF_Expression/NF_kappa_B_signaling_pathway.pdf
- Suppl-Material-S3-Pathways-PSF_Expression/NOD_like_receptor_signaling_pathway.pdf
- Suppl-Material-S3-Pathways-PSF_Expression/Notch_signaling_pathway.pdf
- Suppl-Material-S3-Pathways-PSF_Expression/Oxytocin_signaling_pathway.pdf
- Suppl-Material-S3-Pathways-PSF_Expression/p53_signaling_pathway.pdf
- Suppl-Material-S3-Pathways-PSF_Expression/Phosphatidylinositol_signaling_system.pdf
- Suppl-Material-S3-Pathways-PSF_Expression/Phospholipase_D_signaling_pathway.pdf
- Suppl-Material-S3-Pathways-PSF_Expression/PI3K_Akt_signaling_pathway.pdf
- Suppl-Material-S3-Pathways-PSF_Expression/PPAR_signaling_pathway.pdf
- Suppl-Material-S3-Pathways-PSF_Expression/Prolactin_signaling_pathway.pdf
- Suppl-Material-S3-Pathways-PSF_Expression/Rap1_signaling_pathway.pdf
- Suppl-Material-S3-Pathways-PSF_Expression/Ras_signaling_pathway.pdf
- Suppl-Material-S3-Pathways-PSF_Expression/Relaxin_signaling_pathway.pdf
- Suppl-Material-S3-Pathways-PSF_Expression/Retrograde_endocannabinoid_signaling.pdf
- Suppl-Material-S3-Pathways-PSF_Expression/RIG_I_like_receptor_signaling_pathway.pdf
- Suppl-Material-S3-Pathways-PSF_Expression/Sphingolipid_signaling_pathway.pdf
- Suppl-Material-S3-Pathways-PSF_Expression/T_cell_receptor_signaling_pathway.pdf
- Suppl-Material-S3-Pathways-PSF_Expression/TGF_beta_signaling_pathway.pdf
- Suppl-Material-S3-Pathways-PSF_Expression/Thyroid_hormone_signaling_pathway.pdf
- Suppl-Material-S3-Pathways-PSF_Expression/TNF_signaling_pathway.pdf
- Suppl-Material-S3-Pathways-PSF_Expression/Toll_like_receptor_signaling_pathway.pdf
- Suppl-Material-S3-Pathways-PSF_Expression/VEGF_signaling_pathway.pdf
- Suppl-Material-S3-Pathways-PSF_Expression/Wnt_signaling_pathway.pdf
- Suppl-Material-S4-Pathways-PSF_Methylation/0verview Heatmaps.pdf
- Suppl-Material-S4-Pathways-PSF_Methylation/0verview.html
- Suppl-Material-S4-Pathways-PSF_Methylation/Adipocytokine_signaling_pathway.pdf
- Suppl-Material-S4-Pathways-PSF_Methylation/Adrenergic_signaling_in_cardiomyocytes.pdf
- Suppl-Material-S4-Pathways-PSF_Methylation/AGE_RAGE_signaling_pathway_in_diabetic_complications.pdf
- Suppl-Material-S4-Pathways-PSF_Methylation/AMPK_signaling_pathway.pdf
- Suppl-Material-S4-Pathways-PSF_Methylation/Apelin_signaling_pathway.pdf
- Suppl-Material-S4-Pathways-PSF_Methylation/B_cell_receptor_signaling_pathway.pdf
- Suppl-Material-S4-Pathways-PSF_Methylation/C_type_lectin_receptor_signaling_pathway.pdf
- Suppl-Material-S4-Pathways-PSF_Methylation/Calcium_signaling_pathway.pdf
- Suppl-Material-S4-Pathways-PSF_Methylation/cAMP_signaling_pathway.pdf
- Suppl-Material-S4-Pathways-PSF_Methylation/cGMP_PKG_signaling_pathway.pdf
- Suppl-Material-S4-Pathways-PSF_Methylation/Chemokine_signaling_pathway.pdf
- Suppl-Material-S4-Pathways-PSF_Methylation/Epithelial_cell_signaling_in_Helicobacter_pylori_infection.pdf
- Suppl-Material-S4-Pathways-PSF_Methylation/ErbB_signaling_pathway.pdf
- Suppl-Material-S4-Pathways-PSF_Methylation/Estrogen_signaling_pathway.pdf
- Suppl-Material-S4-Pathways-PSF_Methylation/Fc_epsilon_RI_signaling_pathway.pdf
- Suppl-Material-S4-Pathways-PSF_Methylation/FoxO_signaling_pathway.pdf
- Suppl-Material-S4-Pathways-PSF_Methylation/Glucagon_signaling_pathway.pdf
- Suppl-Material-S4-Pathways-PSF_Methylation/GnRH_signaling_pathway.pdf
- Suppl-Material-S4-Pathways-PSF_Methylation/Hedgehog_signaling_pathway.pdf
- Suppl-Material-S4-Pathways-PSF_Methylation/HIF_1_signaling_pathway.pdf
- Suppl-Material-S4-Pathways-PSF_Methylation/Hippo_signaling_pathway.pdf
- Suppl-Material-S4-Pathways-PSF_Methylation/Hippo_signaling_pathway_multiple_species.pdf
- Suppl-Material-S4-Pathways-PSF_Methylation/IL_17_signaling_pathway.pdf
- Suppl-Material-S4-Pathways-PSF_Methylation/Insulin_signaling_pathway.pdf
- Suppl-Material-S4-Pathways-PSF_Methylation/JAK_STAT_signaling_pathway.pdf
- Suppl-Material-S4-Pathways-PSF_Methylation/MAPK_signaling_pathway.pdf
- Suppl-Material-S4-Pathways-PSF_Methylation/mTOR_signaling_pathway.pdf
- Suppl-Material-S4-Pathways-PSF_Methylation/Neurotrophin_signaling_pathway.pdf
- Suppl-Material-S4-Pathways-PSF_Methylation/NF_kappa_B_signaling_pathway.pdf
- Suppl-Material-S4-Pathways-PSF_Methylation/NOD_like_receptor_signaling_pathway.pdf
- Suppl-Material-S4-Pathways-PSF_Methylation/Notch_signaling_pathway.pdf
- Suppl-Material-S4-Pathways-PSF_Methylation/Oxytocin_signaling_pathway.pdf
- Suppl-Material-S4-Pathways-PSF_Methylation/p53_signaling_pathway.pdf
- Suppl-Material-S4-Pathways-PSF_Methylation/Phosphatidylinositol_signaling_system.pdf
- Suppl-Material-S4-Pathways-PSF_Methylation/Phospholipase_D_signaling_pathway.pdf
- Suppl-Material-S4-Pathways-PSF_Methylation/PI3K_Akt_signaling_pathway.pdf
- Suppl-Material-S4-Pathways-PSF_Methylation/PPAR_signaling_pathway.pdf
- Suppl-Material-S4-Pathways-PSF_Methylation/Prolactin_signaling_pathway.pdf
- Suppl-Material-S4-Pathways-PSF_Methylation/Rap1_signaling_pathway.pdf
- Suppl-Material-S4-Pathways-PSF_Methylation/Ras_signaling_pathway.pdf
- Suppl-Material-S4-Pathways-PSF_Methylation/Relaxin_signaling_pathway.pdf
- Suppl-Material-S4-Pathways-PSF_Methylation/Retrograde_endocannabinoid_signaling.pdf
- Suppl-Material-S4-Pathways-PSF_Methylation/RIG_I_like_receptor_signaling_pathway.pdf
- Suppl-Material-S4-Pathways-PSF_Methylation/Sphingolipid_signaling_pathway.pdf
- Suppl-Material-S4-Pathways-PSF_Methylation/T_cell_receptor_signaling_pathway.pdf
- Suppl-Material-S4-Pathways-PSF_Methylation/TGF_beta_signaling_pathway.pdf
- Suppl-Material-S4-Pathways-PSF_Methylation/Thyroid_hormone_signaling_pathway.pdf
- Suppl-Material-S4-Pathways-PSF_Methylation/TNF_signaling_pathway.pdf
- Suppl-Material-S4-Pathways-PSF_Methylation/Toll_like_receptor_signaling_pathway.pdf
- Suppl-Material-S4-Pathways-PSF_Methylation/VEGF_signaling_pathway.pdf
- Suppl-Material-S4-Pathways-PSF_Methylation/Wnt_signaling_pathway.pdf
