# Supplementary material for: The Transcriptome and Methylome of the Developing and Aging Brain and Their Relations to Gliomas and Psychological Disorders
Source: Cells. 2022 Jan 21;11(3):362. doi: 10.3390/cells11030362 (PMC8834030; doi:10.3390/cells11030362)

PPAR signaling pathway

all genes

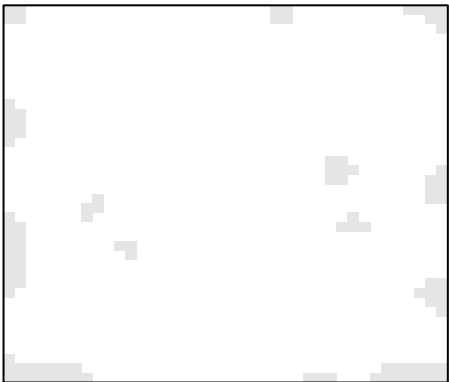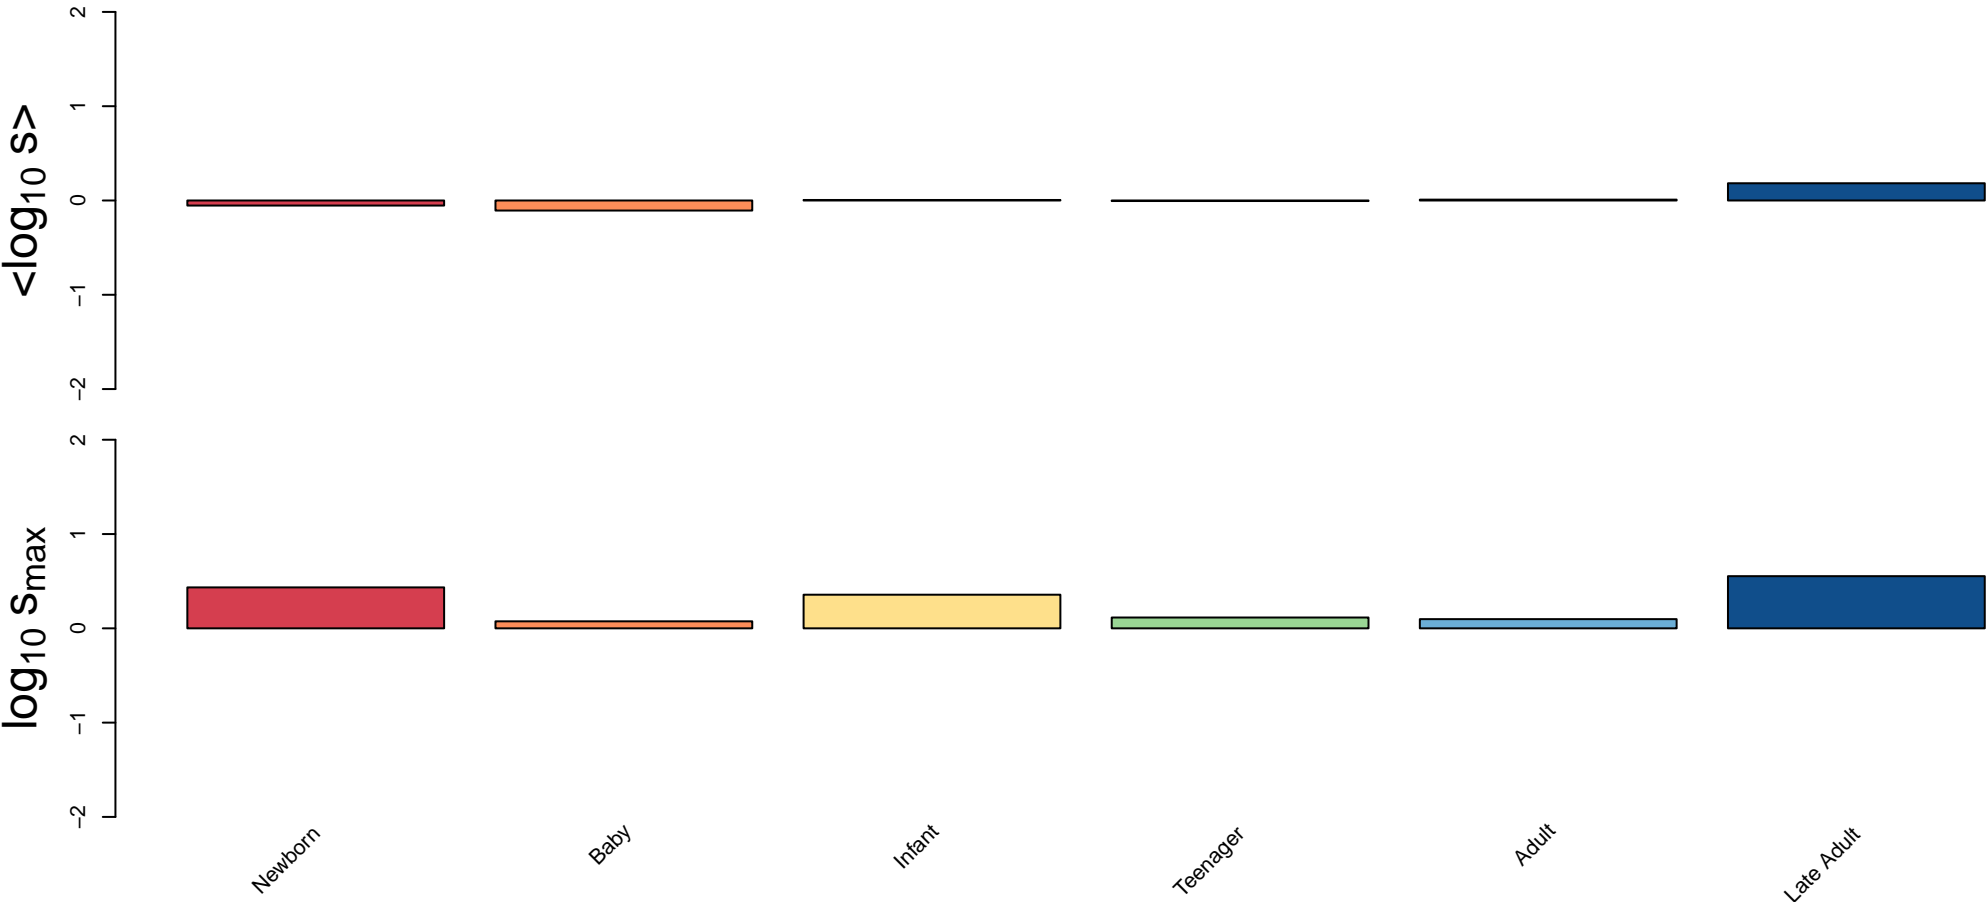

PPAR\_signaling\_pathway  
genes with data

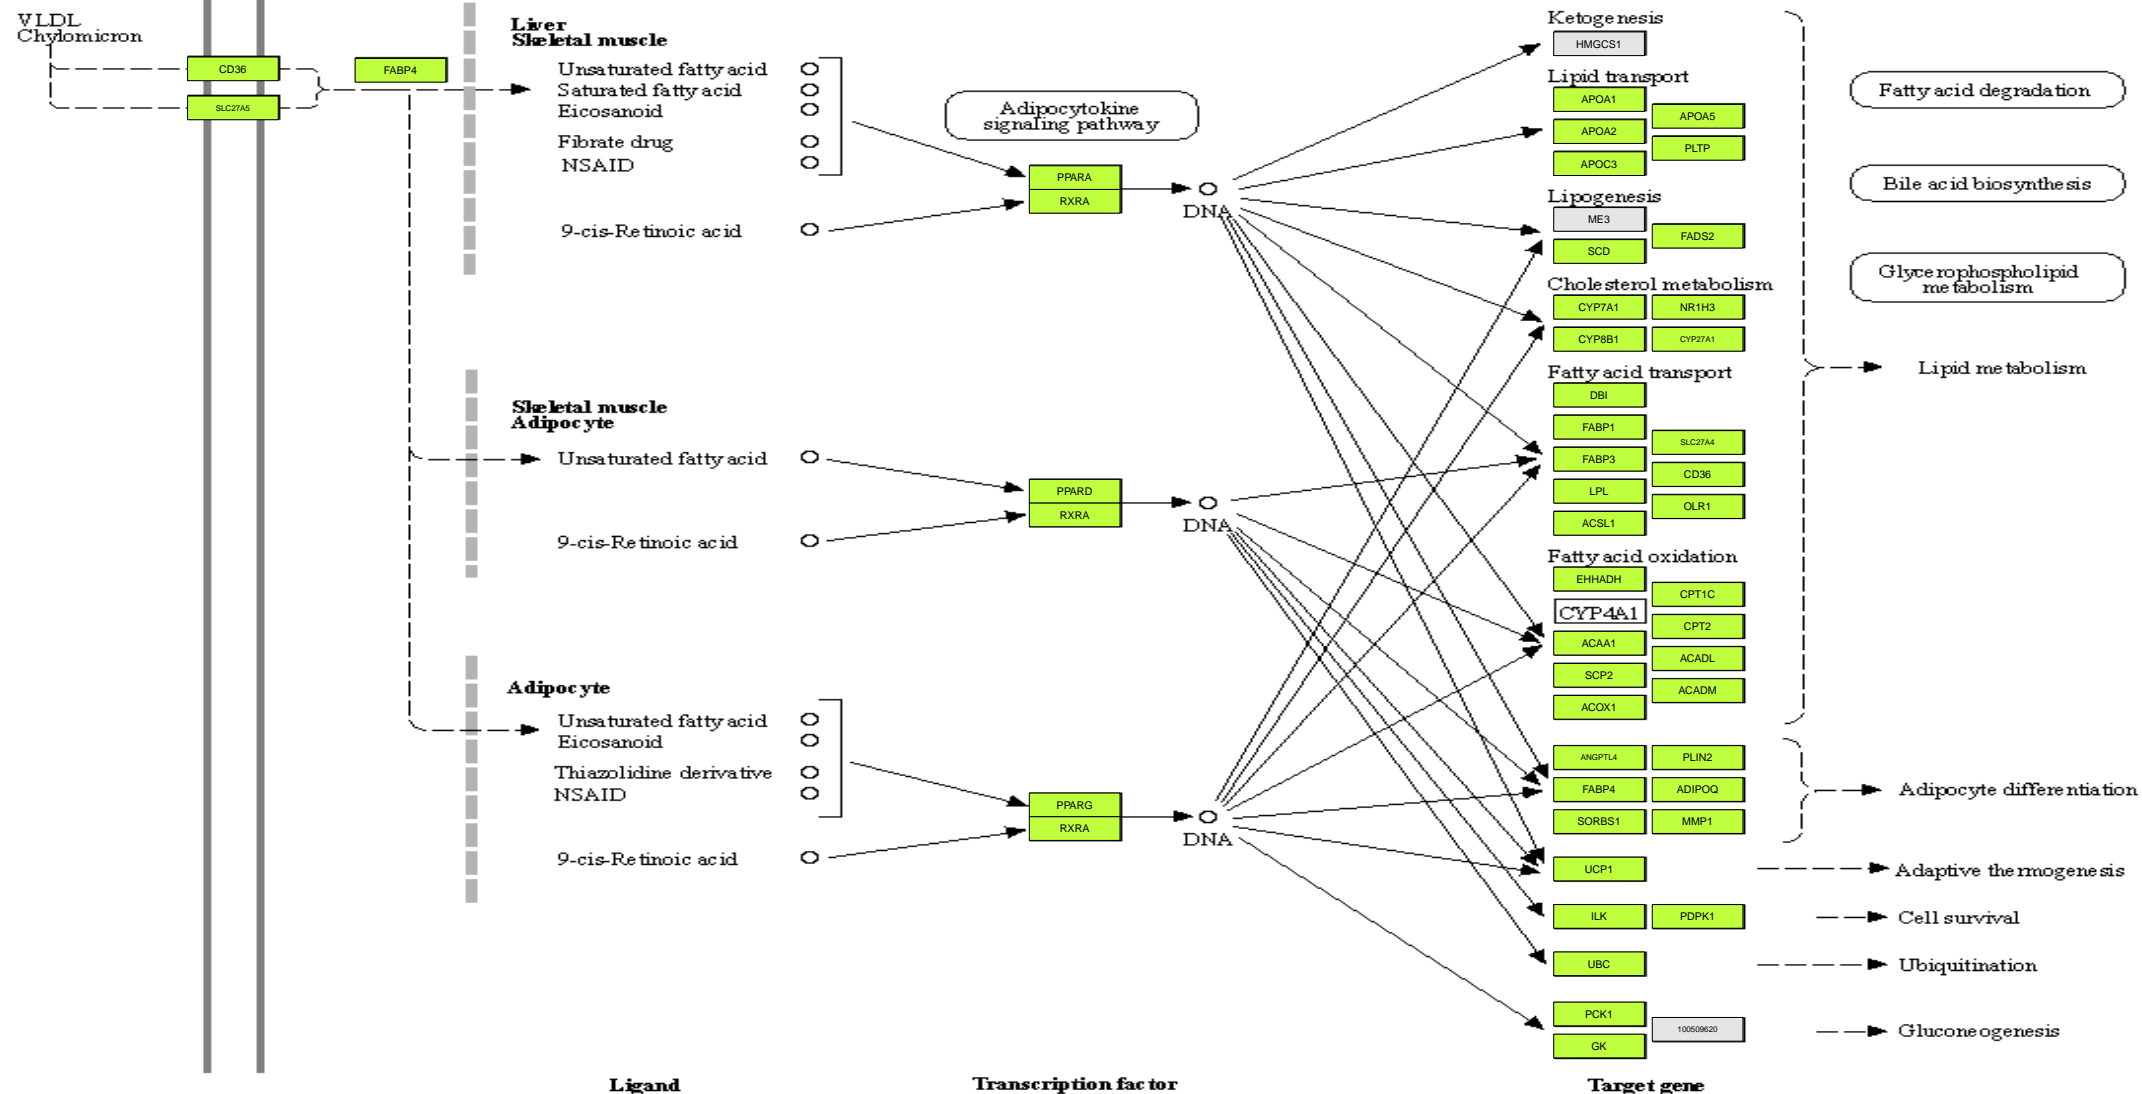

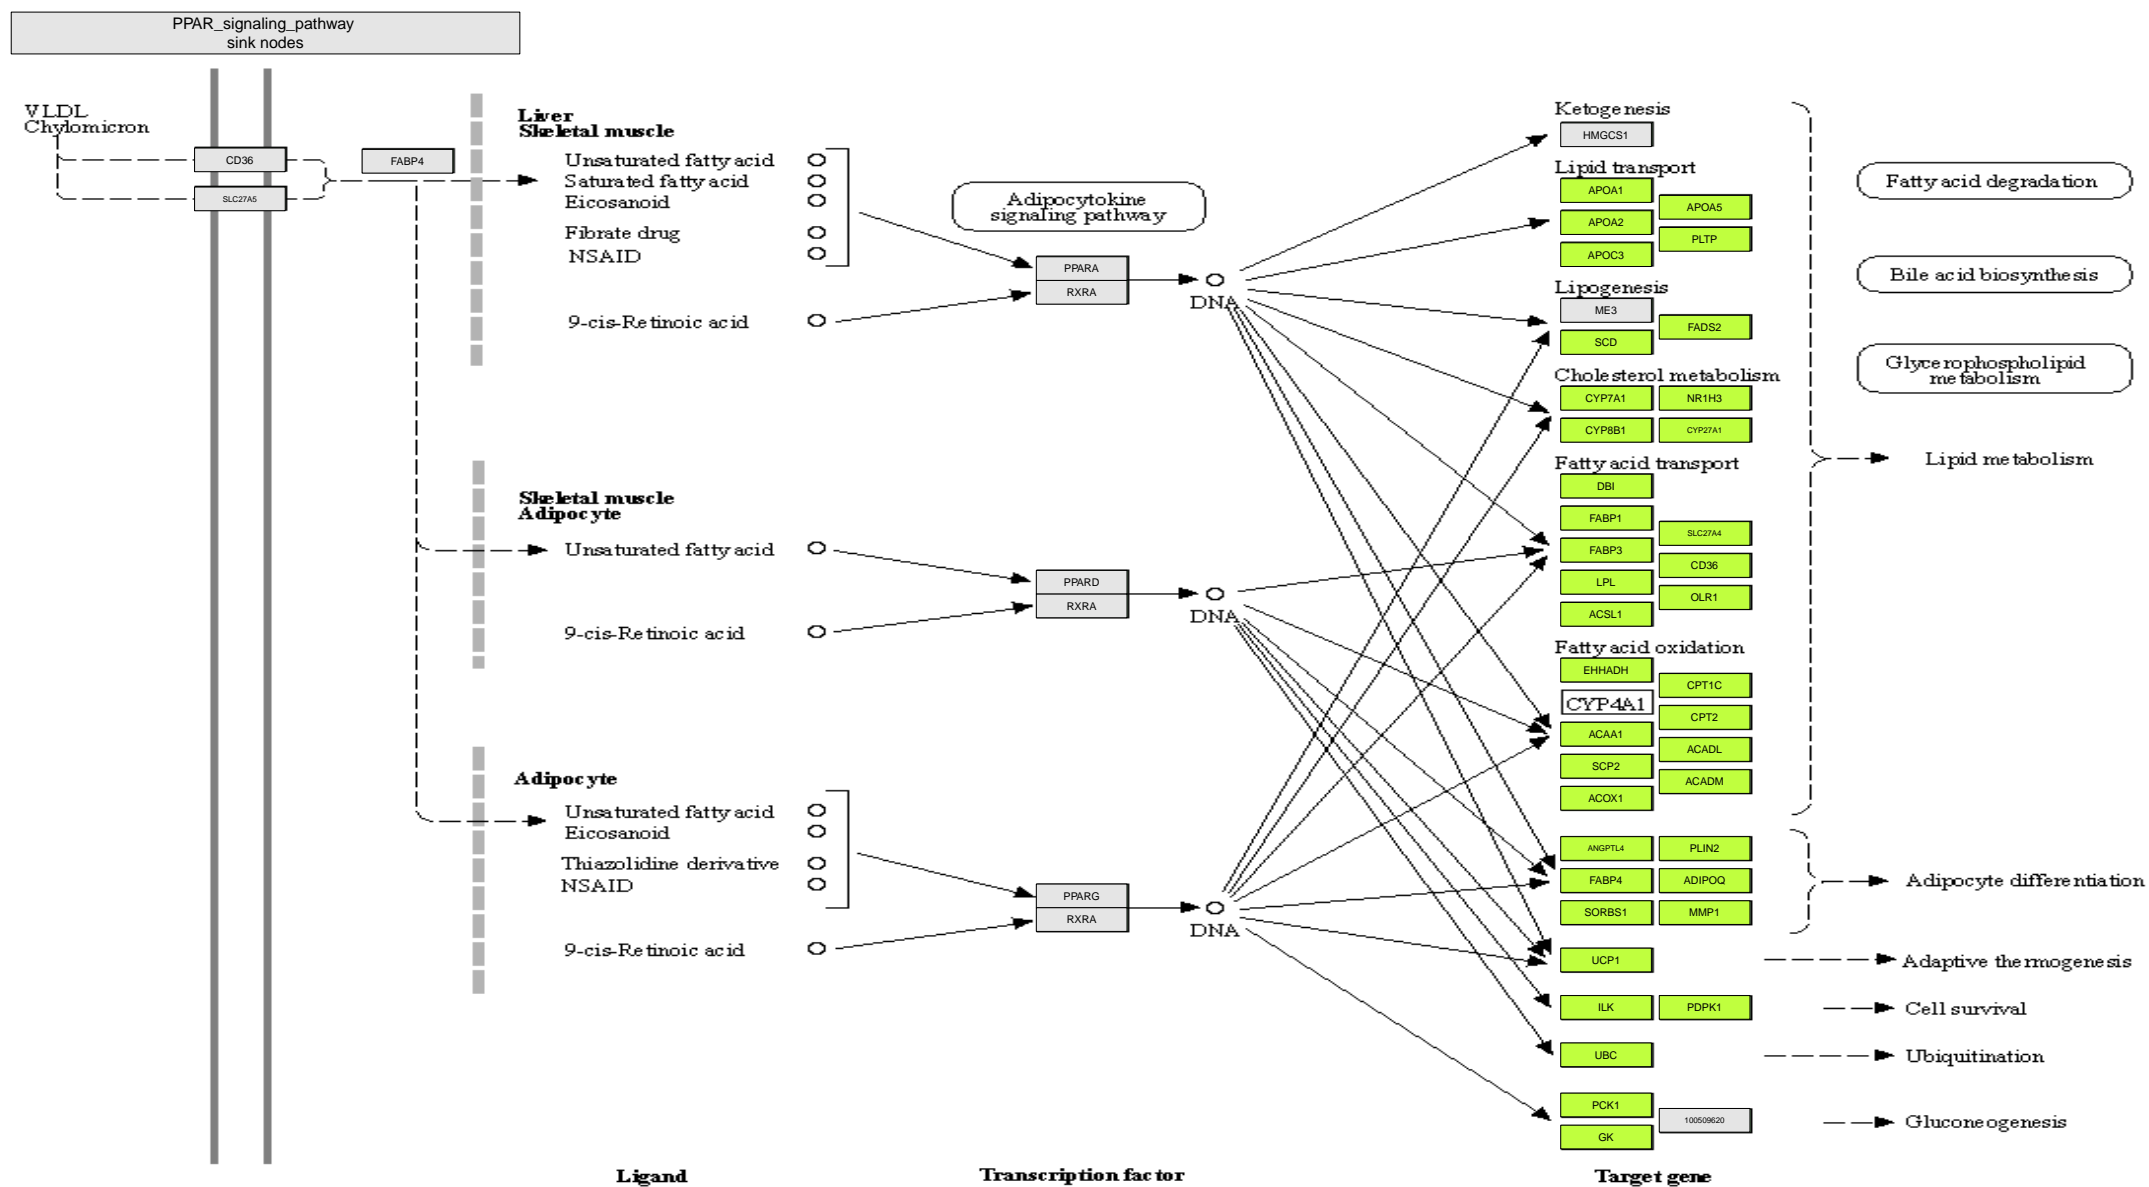

PPAR\_signaling\_pathway  
Newborn

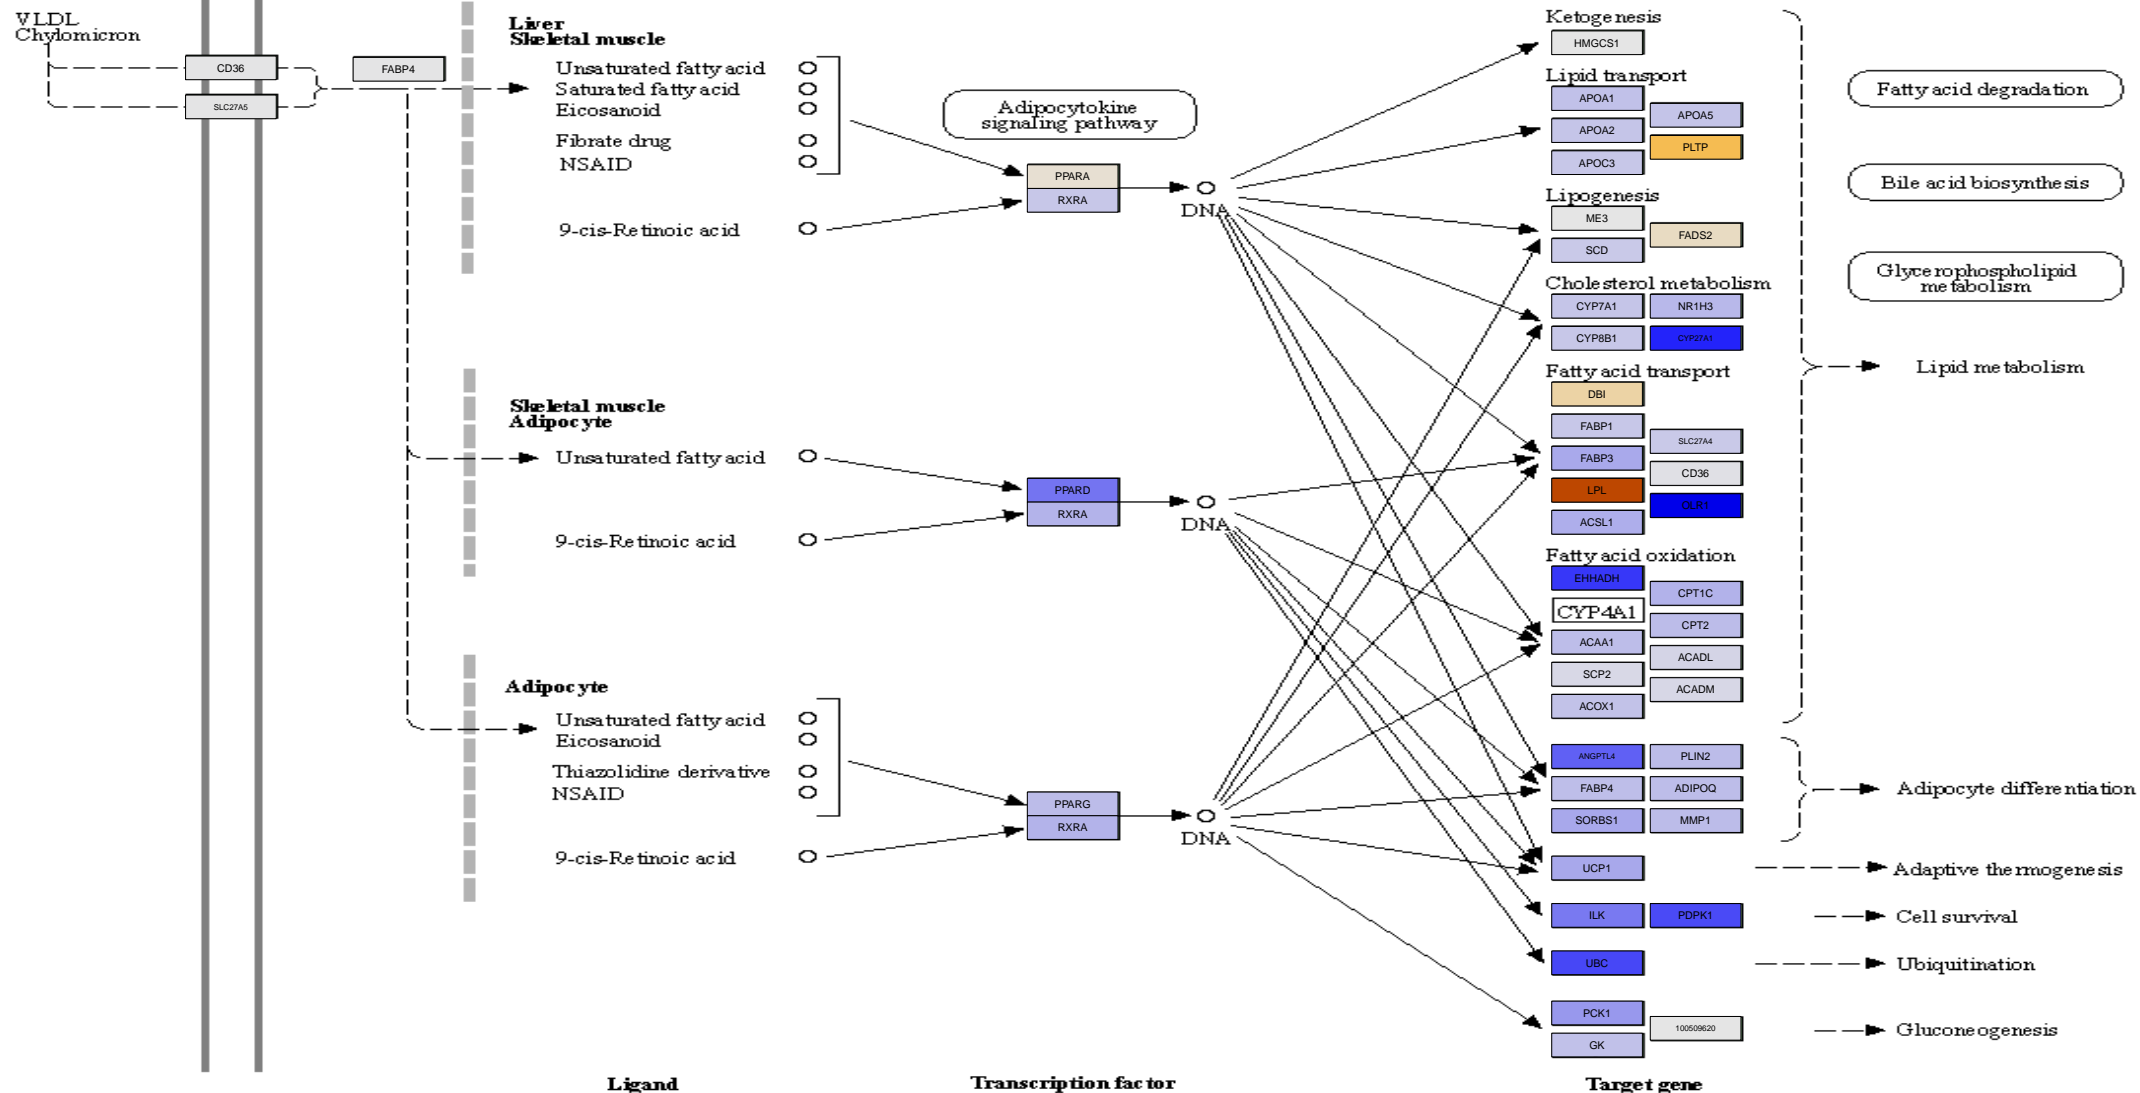

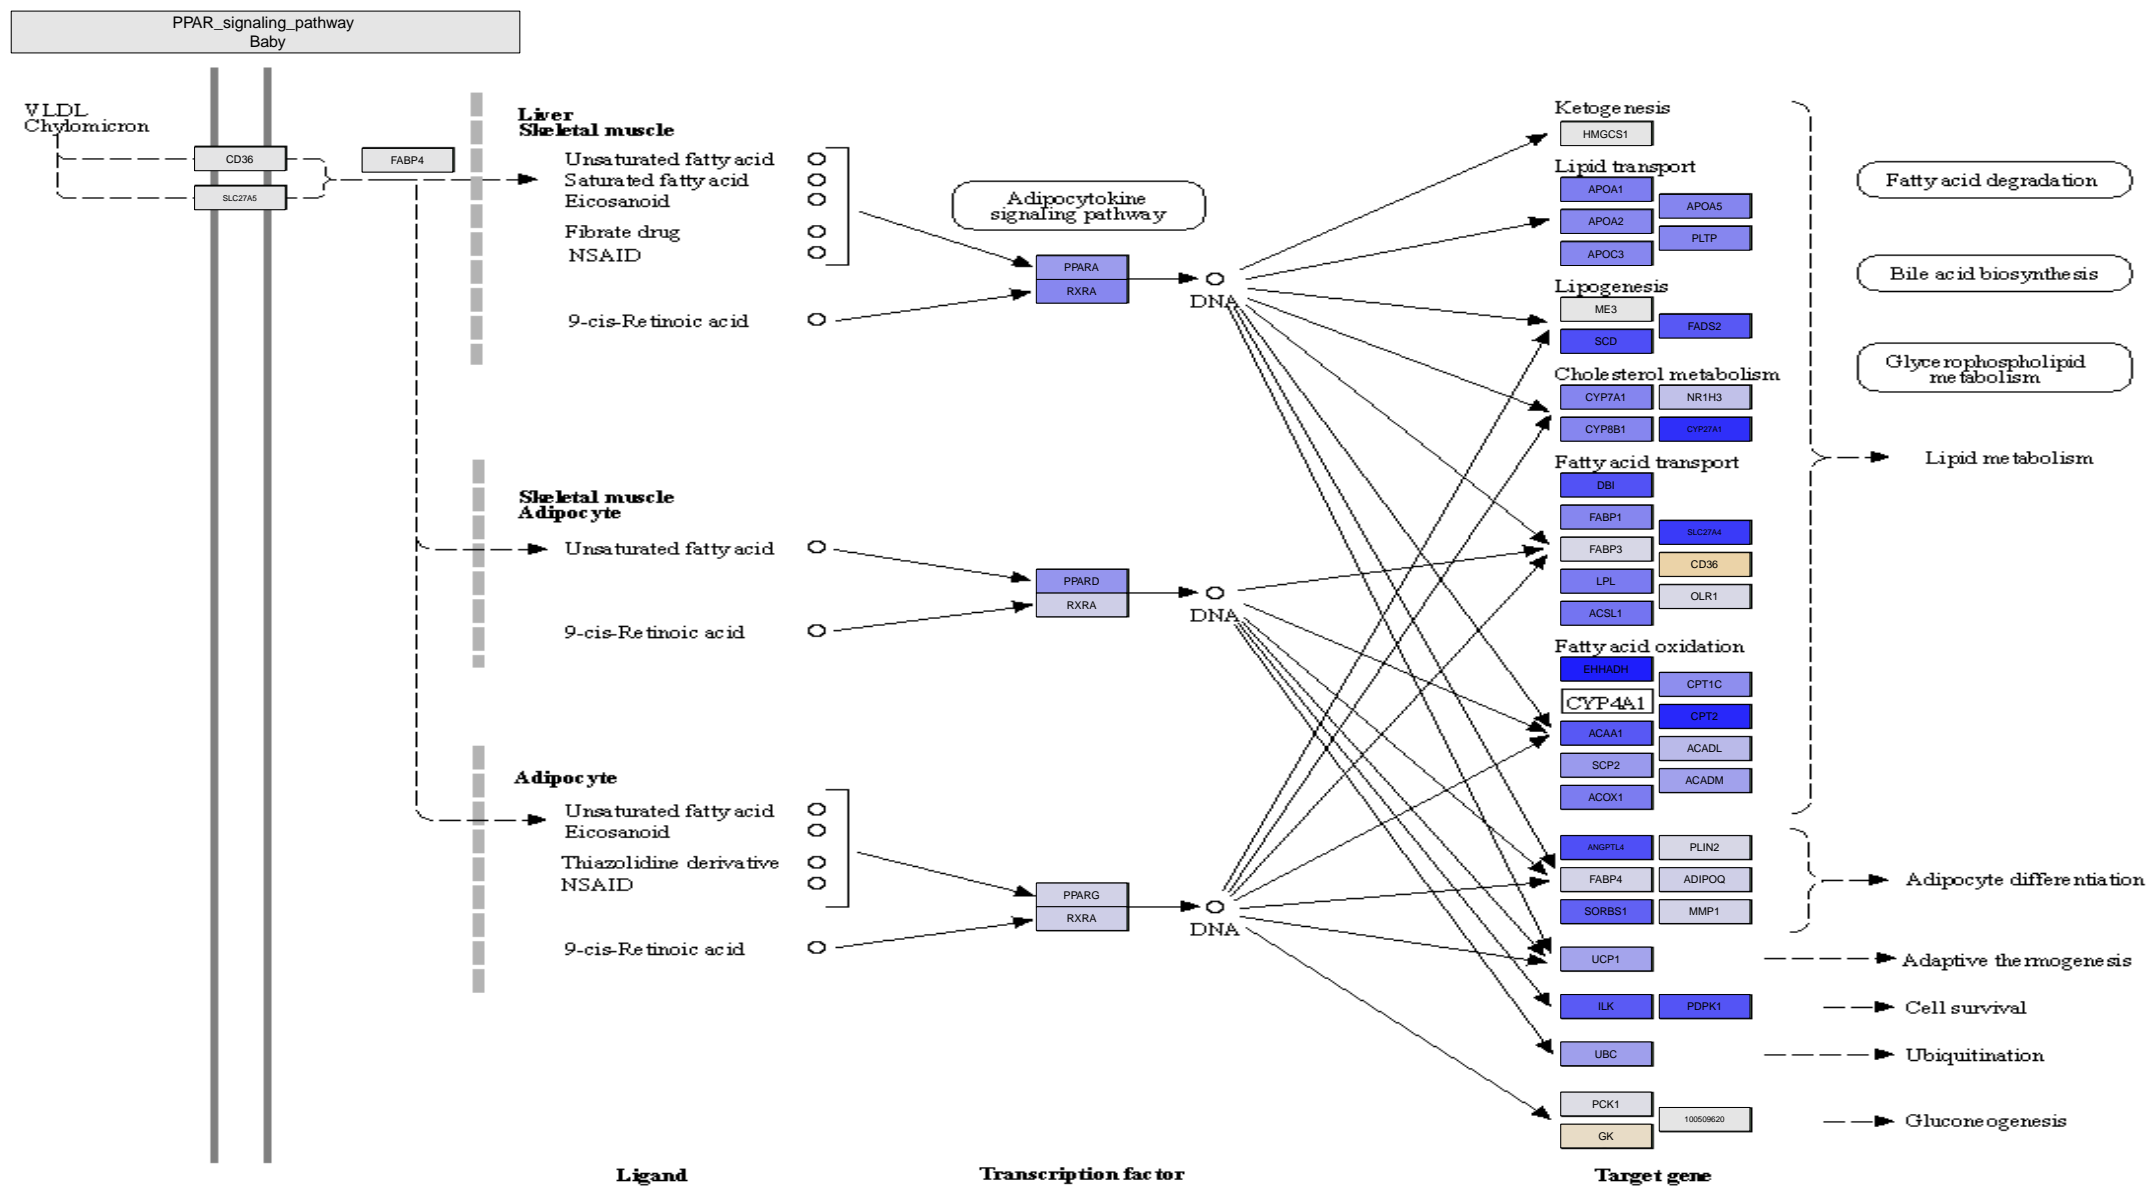

PPAR\_signaling\_pathway  
Infant

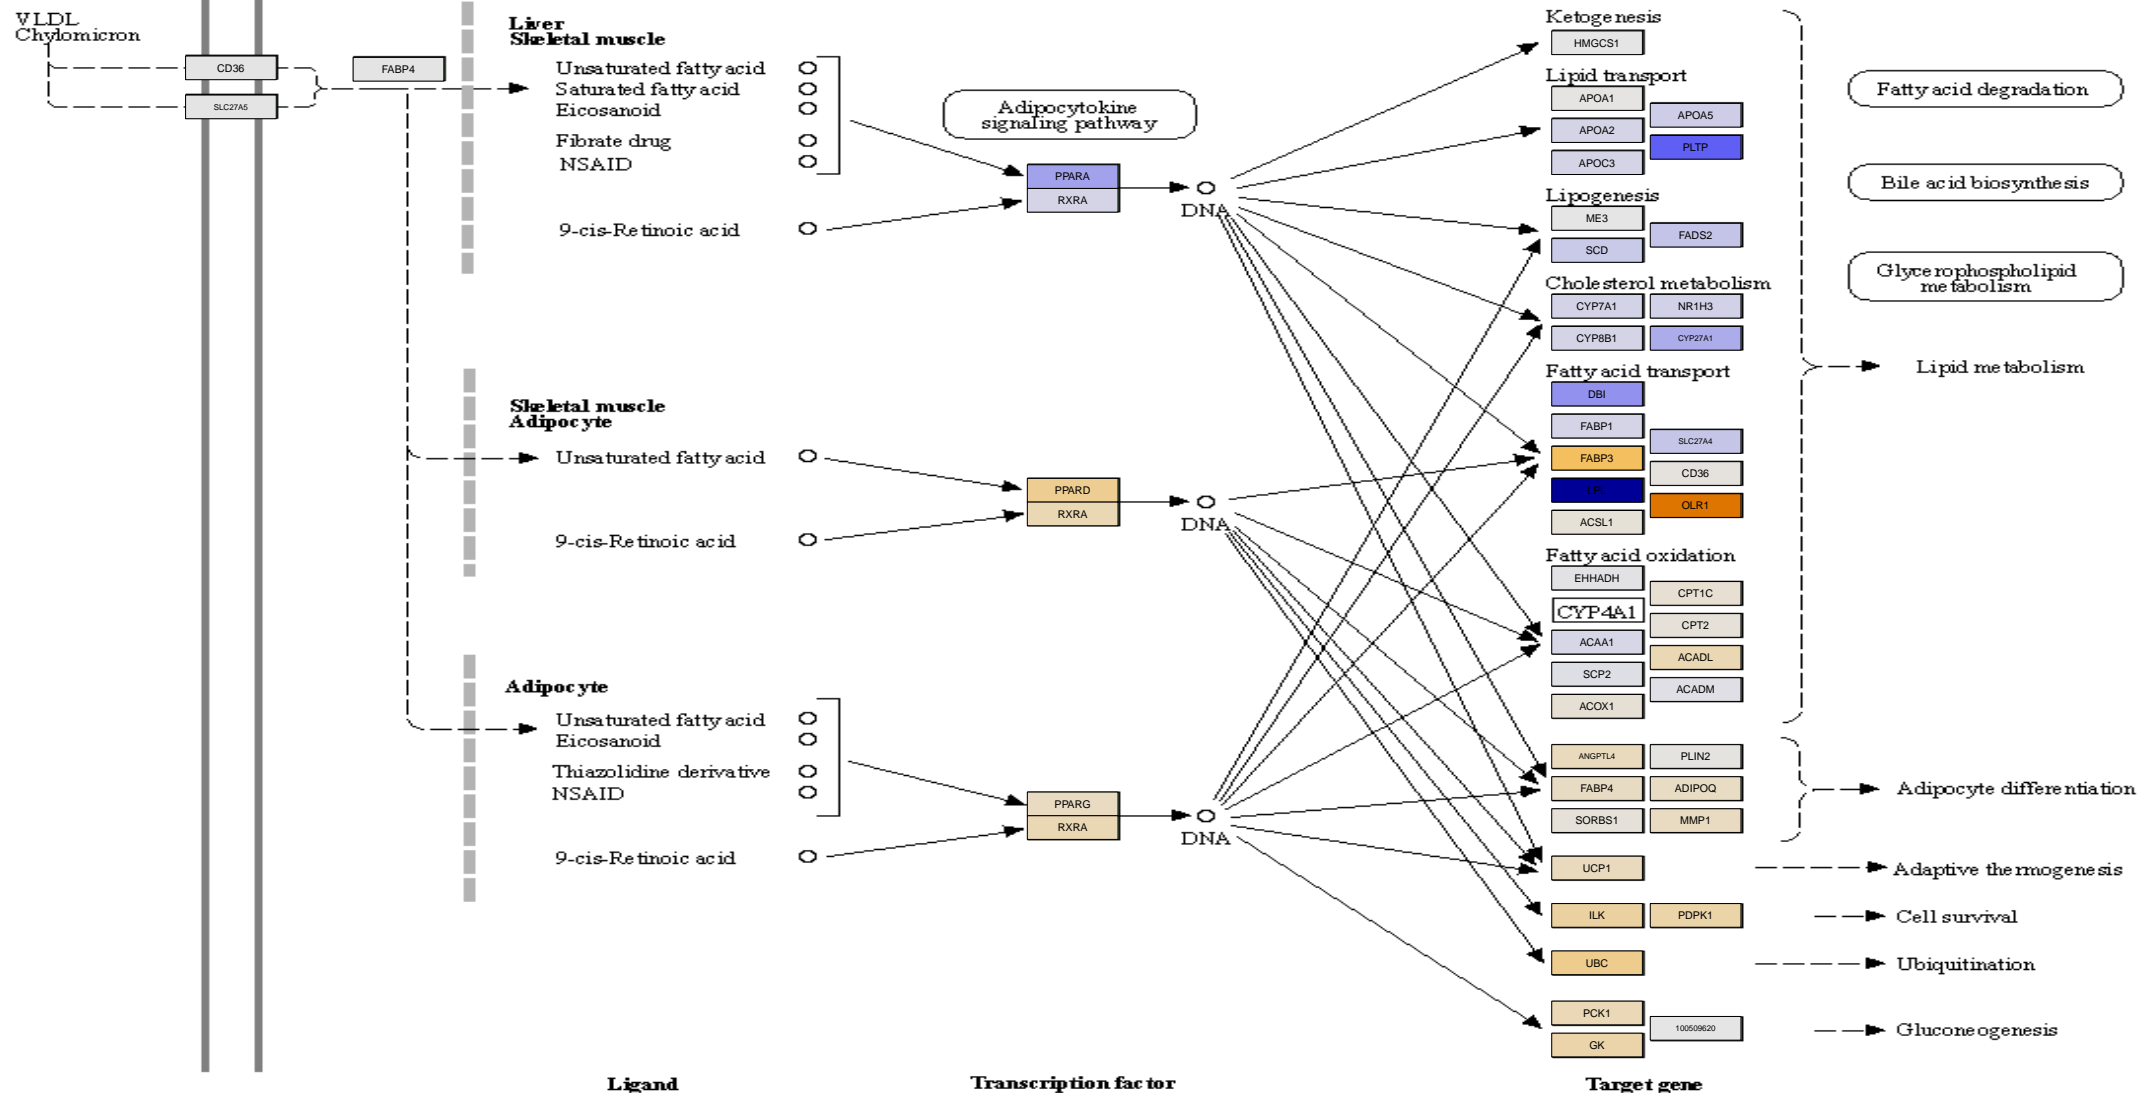

PPAR\_signaling\_pathway  
Teenager

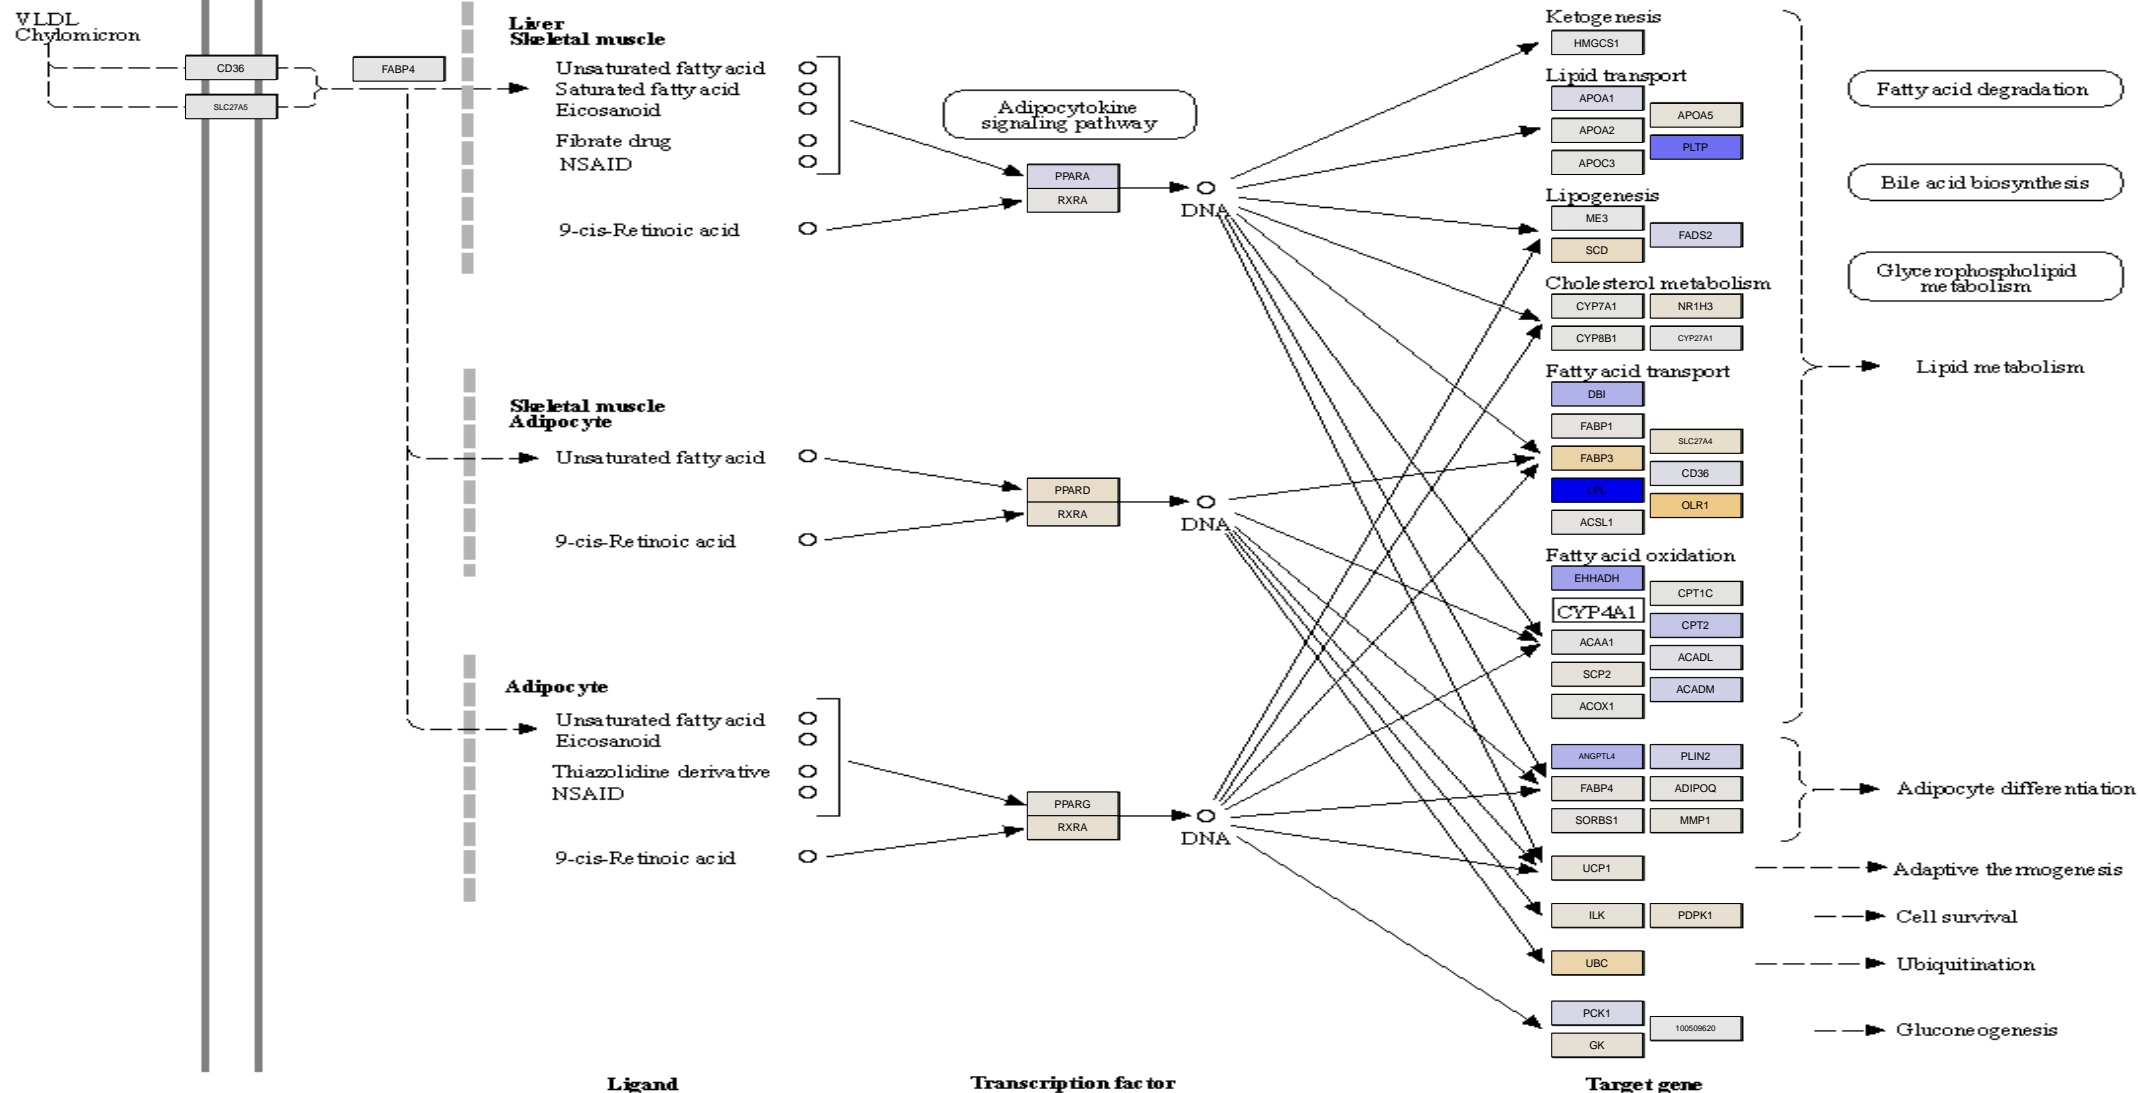

# PPAR\_signaling\_pathway Adult

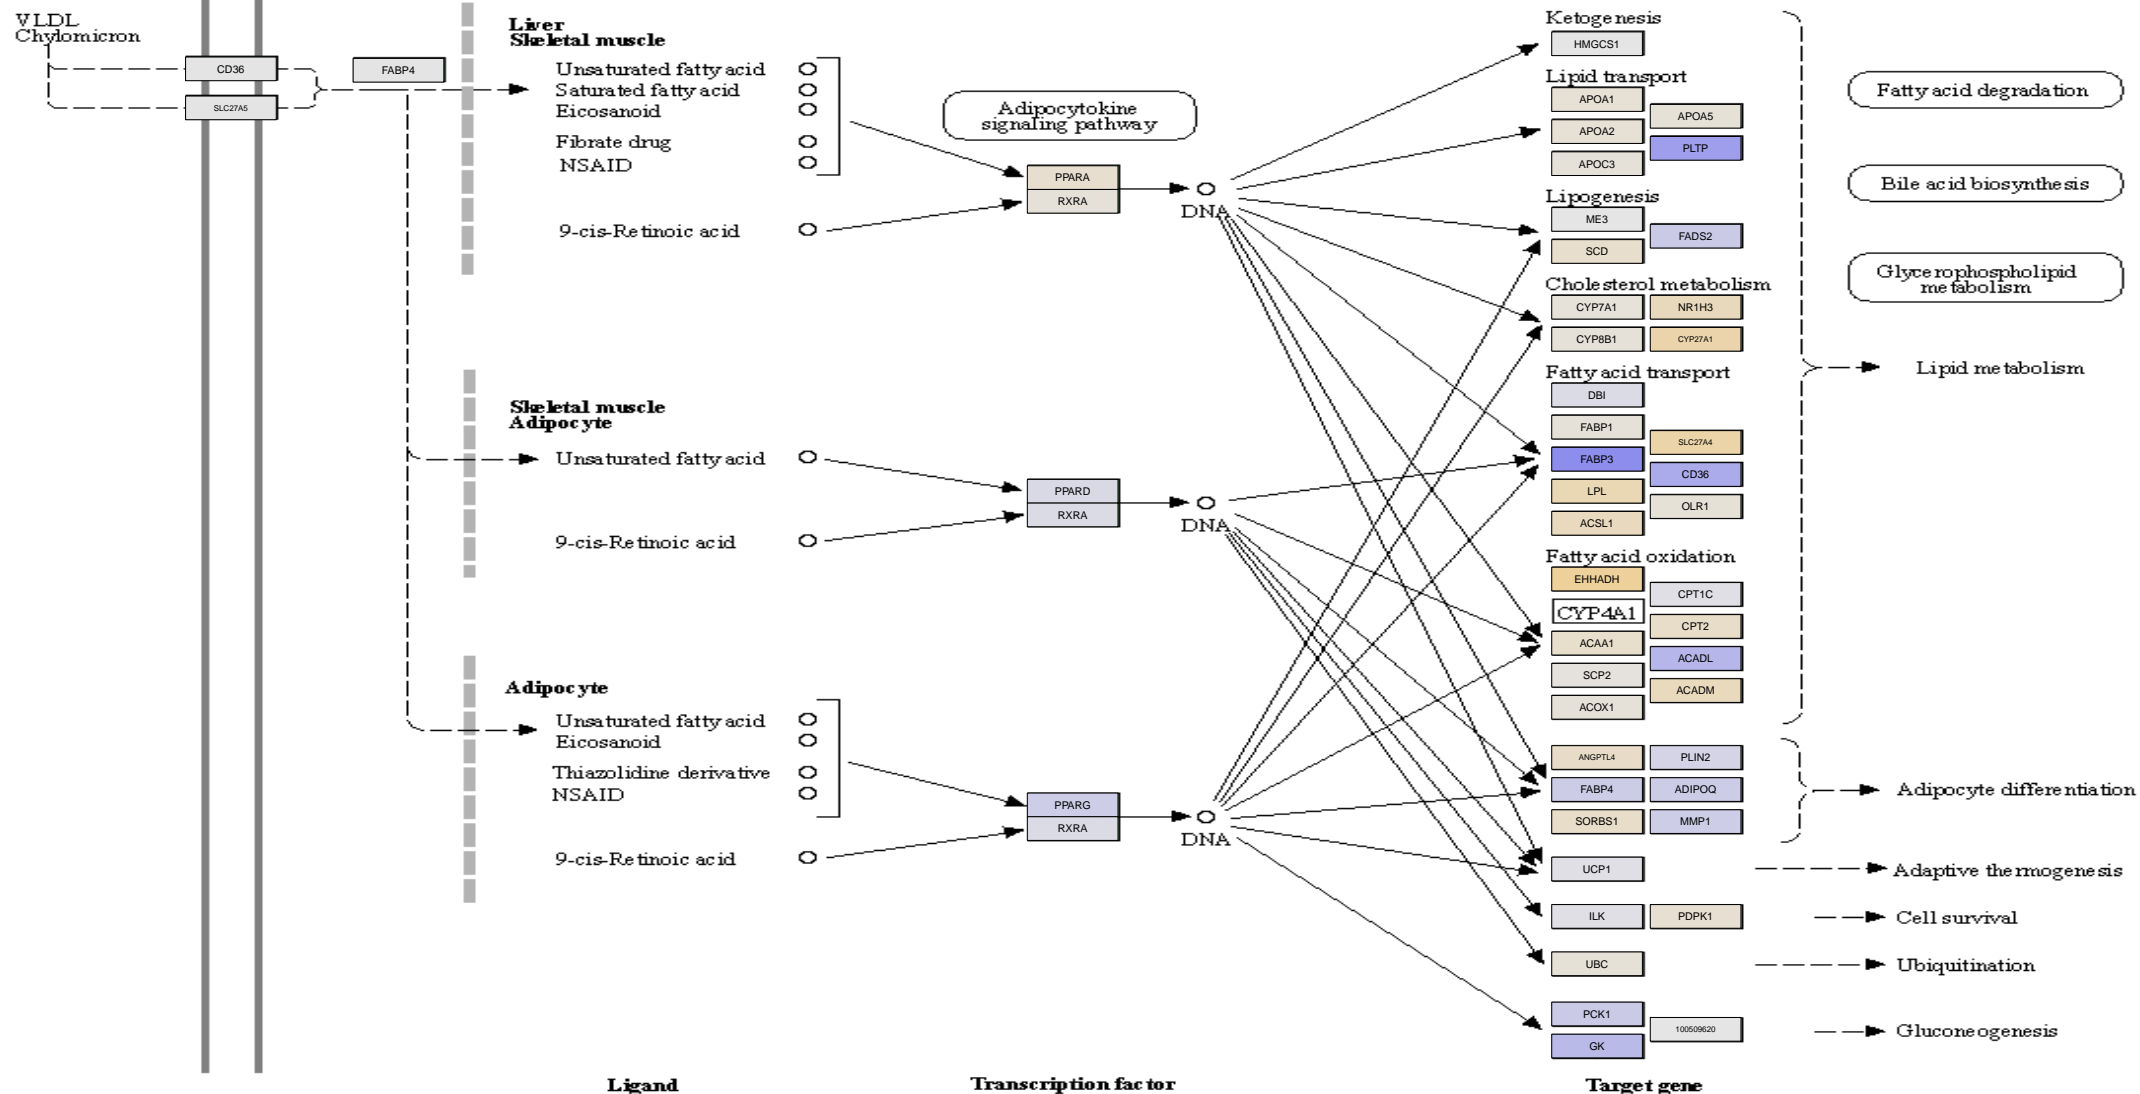

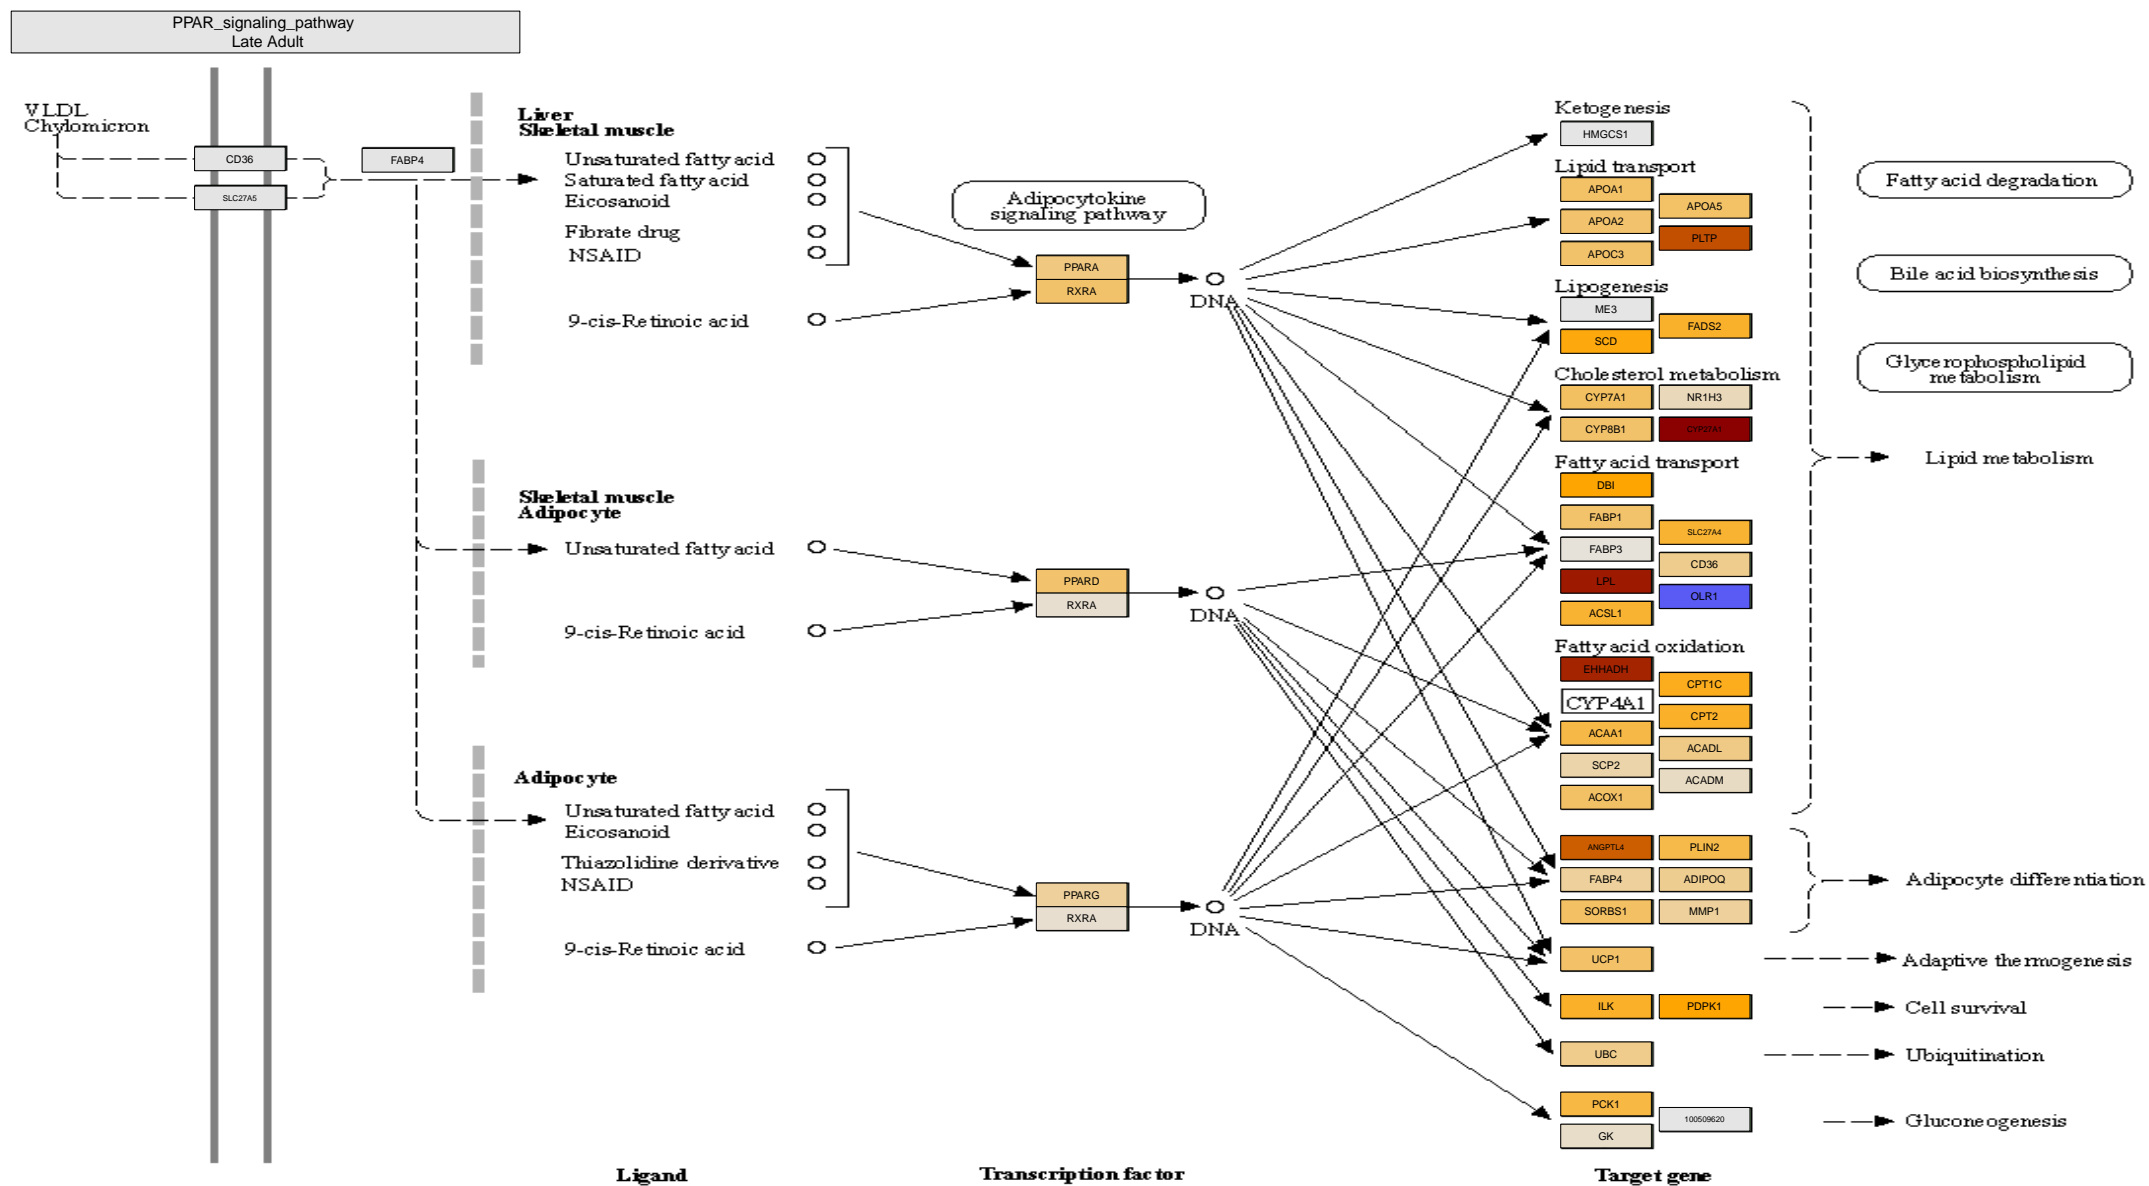

Supplement: Supplementary file 1 [file cells-11-00362-s001.zip › Suppl-Material-S3-Pathways-PSF_Expression/PPAR_signaling_pathway.pdf]
