# Supplementary material for: The Transcriptome and Methylome of the Developing and Aging Brain and Their Relations to Gliomas and Psychological Disorders
Source: Cells. 2022 Jan 21;11(3):362. doi: 10.3390/cells11030362 (PMC8834030; doi:10.3390/cells11030362)
Supplement: Supplementary file 1 [file cells-11-00362-s001.zip › Supplementary_Table-S2-Methylation_Spots.csv]

;Rank;ID;Symbol;mean expression;SD;max delta e;min delta e;correlation;->t.score;->p.value;Metagene;Chromosome;Description
ENSG00000104371;476;ENSG00000104371;DKK4;-0	222014168;0	23257464;0	19691556;-0	768383373;0	982656134;33	93101481;0 .;40 x 1;8 p11;"dickkopf WNT signaling pathway inhibitor 4 [Source:HGNC Symbol;Acc:HGNC:2894]"
ENSG00000163666;239;ENSG00000163666;HESX1;0	099067012;0	374328601;0	286857701;-1	273630841;0	980443985;31	90018876;0 .;40 x 1;3 p14;"HESX homeobox 1 [Source:HGNC Symbol;Acc:HGNC:4877]"
ENSG00000167103;526;ENSG00000167103;PIP5KL1;-0	532575089;0	232553121;0	174154417;-0	784852202;0	977150157;29	43688152;0 .;40 x 1;9 q34;"phosphatidylinositol-4-phosphate 5-kinase like 1 [Source:HGNC Symbol;Acc:HGNC:28711]"
ENSG00000181541;236;ENSG00000181541;MAB21L2;0	029885357;0	354721698;0	288748228;-1	231259954;0	971614132;26	29805936;0 .;40 x 1;4 q31;"mab-21 like 2 [Source:HGNC Symbol;Acc:HGNC:6758]"
ENSG00000019102;388;ENSG00000019102;VSIG2;0	079995675;0	232468608;0	227113052;-0	79512914;0	970094847;25	59113476;0 .;40 x 1;11 q24;"V-set and immunoglobulin domain containing 2 [Source:HGNC Symbol;Acc:HGNC:17149]"
ENSG00000091490;289;ENSG00000091490;SEL1L3;-0	590333974;0	288730397;0	264699457;-1	061044954;0	970023036;25	55903801;0 .;40 x 1;4 p15;"SEL1L family member 3 [Source:HGNC Symbol;Acc:HGNC:29108]"
ENSG00000140932;593;ENSG00000140932;CMTM2;-0	083294834;0	139869839;0	123822493;-0	500045059;0	969492715;25	32546963;0 .;38 x 4;16 q21;"CKLF like MARVEL transmembrane domain containing 2 [Source:HGNC Symbol;Acc:HGNC:19173]"
ENSG00000131096;238;ENSG00000131096;PYY;-0	721214184;0	260373094;0	287804366;-0	94674235;0	964590043;23	41725754;0 .;40 x 1;17 q21;"peptide YY [Source:HGNC Symbol;Acc:HGNC:9748]"
ENSG00000153046;445;ENSG00000153046;CDYL;0	624839891;0	302602921;0	204835937;-1	080667351;0	962950672;22	86394194;0 .;40 x 1;6 p25;"chromodomain Y like [Source:HGNC Symbol;Acc:HGNC:1811]"
ENSG00000144485;154;ENSG00000144485;HES6;-0	598200905;0	262747385;0	330213485;-0	909329565;0	961845333;22	51080137;0 .;40 x 1;2 q37;"hes family bHLH transcription factor 6 [Source:HGNC Symbol;Acc:HGNC:18254]"
ENSG00000162068;495;ENSG00000162068;NTN3;-0	47699274;0	269078653;0	189546982;-0	965836973;0	961366935;22	36259011;0 .;40 x 1;16 p13;"netrin 3 [Source:HGNC Symbol;Acc:HGNC:8030]"
ENSG00000163794;170;ENSG00000163794;UCN;-0	186294195;0	311338202;0	319648659;-1	057020293;0	960988693;22	2473051;0 .;40 x 1;2 p23;"urocortin [Source:HGNC Symbol;Acc:HGNC:12516]"
ENSG00000204580;313;ENSG00000204580;DDR1;-0	295543942;0	220622188;0	254161888;-0	768771764;0	960798812;22	19004871;0 .;40 x 1;6 p21;"discoidin domain receptor tyrosine kinase 1 [Source:HGNC Symbol;Acc:HGNC:2730]"
ENSG00000170788;179;ENSG00000170788;DYDC1;-0	425468507;0	23568359;0	313458374;-0	832050436;0	960302053;22	04216564;0 .;40 x 1;10 q23;"DPY30 domain containing 1 [Source:HGNC Symbol;Acc:HGNC:23460]"
ENSG00000074181;507;ENSG00000074181;NOTCH3;-0	482822275;0	178016766;0	184584121;-0	740941616;0	959846435;21	90890175;0 .;40 x 3;19 p13;"notch 3 [Source:HGNC Symbol;Acc:HGNC:7883]"
ENSG00000069011;202;ENSG00000069011;PITX1;-0	166758738;0	338212323;0	302479835;-1	157408216;0	959659704;21	85492488;0 .;40 x 1;5 q31;"paired like homeodomain 1 [Source:HGNC Symbol;Acc:HGNC:9004]"
ENSG00000105287;197;ENSG00000105287;PRKD2;-0	262633156;0	372195546;0	305012146;-1	366826409;0	959152034;21	71001357;0 .;40 x 1;19 q13;"protein kinase D2 [Source:HGNC Symbol;Acc:HGNC:17293]"
ENSG00000157111;398;ENSG00000157111;TMEM171;-0	712737246;0	265429466;0	22486758;-0	846340314;0	959051258;21	68156205;0 .;40 x 1;5 q13;"transmembrane protein 171 [Source:HGNC Symbol;Acc:HGNC:27031]"
ENSG00000184492;525;ENSG00000184492;FOXD4L1;0	062946581;0	187871112;0	174878367;-0	592716399;0	958133225;21	42702887;0 .;38 x 1;2 q14;"forkhead box D4 like 1 [Source:HGNC Symbol;Acc:HGNC:18521]"
ENSG00000068028;444;ENSG00000068028;RASSF1;-0	365804;0	195194981;0	204985427;-0	672503014;0	957366871;21	22074369;0 .;39 x 1;3 p21;"Ras association domain family member 1 [Source:HGNC Symbol;Acc:HGNC:9882]"
ENSG00000184451;456;ENSG00000184451;CCR10;-0	275802393;0	139029225;0	202215521;-0	512270763;0	956311152;20	94531464;0 .;38 x 4;17 q21;"C-C motif chemokine receptor 10 [Source:HGNC Symbol;Acc:HGNC:4474]"
ENSG00000108797;455;ENSG00000108797;CNTNAP1;-0	276124267;0	139037486;0	202253015;-0	512186299;0	956299734;20	94238906;0 .;38 x 4;17 q21;"contactin associated protein 1 [Source:HGNC Symbol;Acc:HGNC:8011]"
ENSG00000197520;389;ENSG00000197520;FAM177B;0	560681764;0	186189022;0	226548695;-0	620912425;0	955010464;20	61910255;0 .;39 x 1;1 q41;"family with sequence similarity 177 member B [Source:HGNC Symbol;Acc:HGNC:34395]"
ENSG00000159166;367;ENSG00000159166;LAD1;-0	466087817;0	25089583;0	232718005;-0	925854276;0	954931753;20	59980605;0 .;40 x 1;1 q32;"ladinin 1 [Source:HGNC Symbol;Acc:HGNC:6472]"
ENSG00000187260;322;ENSG00000187260;WDR86;-0	785000149;0	253441546;0	249433404;-0	834247146;0	954820386;20	57258765;0 .;40 x 1;7 q36;"WD repeat domain 86 [Source:HGNC Symbol;Acc:HGNC:28020]"
ENSG00000198768;327;ENSG00000198768;APCDD1L;-0	931693442;0	209994601;0	246606065;-0	729323912;0	951758303;19	86068838;0 .;40 x 1;20 q13;"APC down-regulated 1 like [Source:HGNC Symbol;Acc:HGNC:26892]"
ENSG00000135502;155;ENSG00000135502;SLC26A10;0	394926831;0	273878583;0	328214099;-0	996902009;0	95006313;19	49437861;0 .;40 x 1;12 q13;"solute carrier family 26 member 10 [Source:HGNC Symbol;Acc:HGNC:14470]"
ENSG00000113739;90;ENSG00000113739;STC2;0	42009906;0	390224526;0	382760733;-1	395467797;0	948880279;19	2493704;0 .;40 x 1;5 q35;"stanniocalcin 2 [Source:HGNC Symbol;Acc:HGNC:11374]"
ENSG00000164591;587;ENSG00000164591;MYOZ3;0	267036512;0	113890132;0	133887576;-0	419695947;0	948509266;19	17422095;0 .;38 x 6;5 q33;"myozenin 3 [Source:HGNC Symbol;Acc:HGNC:18565]"
ENSG00000157227;446;ENSG00000157227;MMP14;-0	645773595;0	235855503;0	204753202;-0	773721573;0	948503262;19	17301125;0 .;40 x 1;14 q11;"matrix metallopeptidase 14 [Source:HGNC Symbol;Acc:HGNC:7160]"
ENSG00000144031;419;ENSG00000144031;ANKRD53;-0	372570053;0	236212842;0	216565914;-0	926425597;0	948458795;19	16405909;0 .;40 x 2;2 p13;"ankyrin repeat domain 53 [Source:HGNC Symbol;Acc:HGNC:25691]"
ENSG00000117013;516;ENSG00000117013;KCNQ4;-0	614476182;0	181396868;0	1797475;-0	628173054;0	947573051;18	98805401;0 .;39 x 1;1 p34;"potassium voltage-gated channel subfamily Q member 4 [Source:HGNC Symbol;Acc:HGNC:6298]"
ENSG00000115138;142;ENSG00000115138;POMC;0	229559682;0	277862196;0	340287544;-0	932574875;0	946440026;18	76913841;0 .;40 x 1;2 p23;"proopiomelanocortin [Source:HGNC Symbol;Acc:HGNC:9201]"
ENSG00000121898;251;ENSG00000121898;CPXM2;-0	264486534;0	227740283;0	280787952;-0	825684971;0	945983161;18	68276771;0 .;40 x 1;10 q26;"carboxypeptidase X	M14 family member 2 [Source:HGNC Symbol;Acc:HGNC:26977]"
ENSG00000078900;314;ENSG00000078900;TP73;-1	015151853;0	265333657;0	253289058;-0	843500071;0	944920898;18	48600164;0 .;40 x 1;1 p36;"tumor protein p73 [Source:HGNC Symbol;Acc:HGNC:12003]"
ENSG00000198336;280;ENSG00000198336;MYL4;0	543096685;0	281977478;0	270417933;-0	852857501;0	944072957;18	33286227;0 .;40 x 1;17 q21;"myosin light chain 4 [Source:HGNC Symbol;Acc:HGNC:7585]"
ENSG00000169495;68;ENSG00000169495;HTRA4;0	233344072;0	423665696;0	414402228;-1	384456174;0	942922524;18	13041801;0 .;40 x 1;8 p11;"HtrA serine peptidase 4 [Source:HGNC Symbol;Acc:HGNC:26909]"
ENSG00000163828;321;ENSG00000163828;;0	004561898;0	248723363;0	249617964;-0	819417744;0	942847563;18	11743332;0 .;40 x 1; ;
ENSG00000134247;416;ENSG00000134247;PTGFRN;-0	661900106;0	222301271;0	217470335;-0	932772335;0	942180579;18	00298016;0 .;40 x 1;1 p13;"prostaglandin F2 receptor inhibitor [Source:HGNC Symbol;Acc:HGNC:9601]"
ENSG00000075290;342;ENSG00000075290;WNT8B;0	164855865;0	243325487;0	241043096;-0	782999979;0	941888973;17	95354304;0 .;40 x 1;10 q24;"Wnt family member 8B [Source:HGNC Symbol;Acc:HGNC:12789]"
ENSG00000162543;384;ENSG00000162543;UBXN10;-0	481540034;0	230044774;0	228634243;-0	844150241;0	941079636;17	81820359;0 .;40 x 1;1 p36;"UBX domain protein 10 [Source:HGNC Symbol;Acc:HGNC:26354]"
ENSG00000111664;258;ENSG00000111664;GNB3;0	168720824;0	161947995;0	278751073;-0	572349726;0	941018027;17	80801191;0 .;39 x 3;12 p13;"G protein subunit beta 3 [Source:HGNC Symbol;Acc:HGNC:4400]"
ENSG00000164185;252;ENSG00000164185;ZNF474;-0	261297576;0	225355726;0	280783908;-0	759477882;0	94064106;17	74598806;0 .;40 x 2;5 q23;"zinc finger protein 474 [Source:HGNC Symbol;Acc:HGNC:23245]"
ENSG00000127241;502;ENSG00000127241;MASP1;-0	12895624;0	232751728;0	18818766;-0	903590939;0	939764283;17	60391817;0 .;40 x 1;3 q27;"mannan binding lectin serine peptidase 1 [Source:HGNC Symbol;Acc:HGNC:6901]"
ENSG00000170049;528;ENSG00000170049;KCNAB3;-0	039496091;0	138063254;0	171945623;-0	454058767;0	938530686;17	40904237;0 .;37 x 4;17 p13;"potassium voltage-gated channel subfamily A regulatory beta subunit 3 [Source:HGNC Symbol;Acc:HGNC:6230]"
ENSG00000175707;530;ENSG00000175707;KDF1;-0	513387252;0	176707453;0	171474444;-0	584516876;0	937211997;17	20690877;0 .;40 x 3;1 p36;"keratinocyte differentiation factor 1 [Source:HGNC Symbol;Acc:HGNC:26624]"
ENSG00000125144;231;ENSG00000125144;MT1G;-0	57605047;0	262936995;0	289930963;-0	940855644;0	937196039;17	20450051;0 .;40 x 1;16 q13;"metallothionein 1G [Source:HGNC Symbol;Acc:HGNC:7399]"
ENSG00000183798;255;ENSG00000183798;EMILIN3;-0	369007492;0	23209789;0	280014317;-0	825259048;0	937099065;17	18988481;0 .;40 x 1;20 q12;"elastin microfibril interfacer 3 [Source:HGNC Symbol;Acc:HGNC:16123]"
ENSG00000101115;1;ENSG00000101115;SALL4;-0	08696884;0	425071823;0	897129163;-1	432915083;0	936810302;17	14655597;0 .;40 x 1;20 q13;"spalt like transcription factor 4 [Source:HGNC Symbol;Acc:HGNC:15924]"
ENSG00000171786;565;ENSG00000171786;NHLH1;0	68896516;0	157404225;0	15759964;-0	580382181;0	936475595;17	09669156;0 .;38 x 3;1 q23;"nescient helix-loop-helix 1 [Source:HGNC Symbol;Acc:HGNC:7817]"
ENSG00000124831;574;ENSG00000124831;LRRFIP1;0	040829227;0	172286893;0	149567294;-0	656372585;0	936174999;17	05223263;0 .;40 x 4;2 q37;"LRR binding FLII interacting protein 1 [Source:HGNC Symbol;Acc:HGNC:6702]"
ENSG00000149295;411;ENSG00000149295;DRD2;-0	723085776;0	231866748;0	218755084;-0	848945832;0	935422346;16	94223349;0 .;40 x 1;11 q23;"dopamine receptor D2 [Source:HGNC Symbol;Acc:HGNC:3023]"
ENSG00000159674;293;ENSG00000159674;SPON2;-0	131035941;0	272833699;0	26270345;-1	069726861;0	934700469;16	83846461;0 .;40 x 1;4 p16;"spondin 2 [Source:HGNC Symbol;Acc:HGNC:11253]"
ENSG00000124237;337;ENSG00000124237;C20orf85;0	16018169;0	212603117;0	243193438;-0	756031096;0	934083164;16	75103798;0 .;40 x 1;20 q13;"chromosome 20 open reading frame 85 [Source:HGNC Symbol;Acc:HGNC:16216]"
ENSG00000162383;357;ENSG00000162383;SLC1A7;0	979605622;0	203874648;0	236670774;-0	65913769;0	933657162;16	69139362;0 .;40 x 2;1 p32;"solute carrier family 1 member 7 [Source:HGNC Symbol;Acc:HGNC:10945]"
ENSG00000167644;151;ENSG00000167644;C19orf33;0	489382912;0	240651497;0	331388322;-0	852240392;0	933549651;16	6764288;0 .;40 x 1;19 q13;"chromosome 19 open reading frame 33 [Source:HGNC Symbol;Acc:HGNC:16668]"
ENSG00000125746;479;ENSG00000125746;EML2;-0	229752681;0	201959454;0	196532186;-0	631051591;0	931835252;16	44243386;0 .;38 x 1;19 q13;"echinoderm microtubule associated protein like 2 [Source:HGNC Symbol;Acc:HGNC:18035]"
ENSG00000199066;478;ENSG00000199066;;-0	230051511;0	201981612;0	196554919;-0	631084166;0	931811204;16	43921229;0 .;38 x 1; ;
ENSG00000142632;50;ENSG00000142632;ARHGEF19;-0	013069436;0	263391405;0	452559054;-0	848396668;0	930917405;16	32062963;0 .;40 x 1;1 p36;"Rho guanine nucleotide exchange factor 19 [Source:HGNC Symbol;Acc:HGNC:26604]"
ENSG00000178279;588;ENSG00000178279;TNP2;0	599899069;0	157600088;0	13272046;-0	51434235;0	93073345;16	29649885;0 .;40 x 5;16 p13;"transition protein 2 [Source:HGNC Symbol;Acc:HGNC:11952]"
ENSG00000131435;309;ENSG00000131435;PDLIM4;0	145627719;0	190819383;0	255572301;-0	574765089;0	930182072;16	22472244;0 .;38 x 1;5 q31;"PDZ and LIM domain 4 [Source:HGNC Symbol;Acc:HGNC:16501]"
ENSG00000135903;458;ENSG00000135903;PAX3;-0	925862783;0	159047738;0	20197837;-0	532734533;0	93011902;16	21656684;0 .;38 x 3;2 q36;"paired box 3 [Source:HGNC Symbol;Acc:HGNC:8617]"
ENSG00000174292;56;ENSG00000174292;TNK1;-0	656019125;0	227986785;0	434462554;-0	811525603;0	930068006;16	20997601;0 .;40 x 1;17 p13;"tyrosine kinase non receptor 1 [Source:HGNC Symbol;Acc:HGNC:11940]"
ENSG00000100078;15;ENSG00000100078;PLA2G3;-0	462613106;0	398375525;0	642324217;-1	313621853;0	928340867;15	99085624;0 .;40 x 1;22 q12;"phospholipase A2 group III [Source:HGNC Symbol;Acc:HGNC:17934]"
ENSG00000207243;316;ENSG00000207243;;-0	464188473;0	266666199;0	251394077;-0	937041544;0	92730718;15	8633287;0 .;40 x 1;16 p13;"Y RNA [Source:RFAM;Acc:RF00019]"
ENSG00000099617;345;ENSG00000099617;EFNA2;-0	613634405;0	155205446;0	240006356;-0	650654695;0	92655441;15	77209393;0 .;38 x 3;19 p13;"ephrin A2 [Source:HGNC Symbol;Acc:HGNC:3222]"
ENSG00000141696;519;ENSG00000141696;P3H4;-0	509810213;0	118349094;0	177974916;-0	42293176;0	926212382;15	73108514;0 .;36 x 5;17 q21;"prolyl 3-hydroxylase family member 4 (non-enzymatic) [Source:HGNC Symbol;Acc:HGNC:16946]"
ENSG00000105472;449;ENSG00000105472;CLEC11A;0	071680475;0	115202152;0	20373574;-0	359126234;0	925663648;15	66586202;0 .;36 x 5;19 q13;"C-type lectin domain containing 11A [Source:HGNC Symbol;Acc:HGNC:10576]"
ENSG00000136689;595;ENSG00000136689;IL1RN;0	747283323;0	16828073;0	110811088;-0	595452653;0	924722236;15	55556682;0 .;40 x 4;2 q14;"interleukin 1 receptor antagonist [Source:HGNC Symbol;Acc:HGNC:6000]"
ENSG00000205358;20;ENSG00000205358;MT1H;-0	531391065;0	319811691;0	580937354;-1	057308108;0	92363637;15	43079071;0 .;40 x 1;16 q13;"metallothionein 1H [Source:HGNC Symbol;Acc:HGNC:7400]"
ENSG00000132518;586;ENSG00000132518;GUCY2D;-0	565354686;0	144977143;0	137714575;-0	554215728;0	923405284;15	40456632;0 .;40 x 5;17 p13;"guanylate cyclase 2D	retinal [Source:HGNC Symbol;Acc:HGNC:4689]"
ENSG00000107821;498;ENSG00000107821;KAZALD1;0	000964216;0	135414531;0	188766158;-0	489887017;0	923185439;15	37972313;0 .;38 x 5;10 q24;"Kazal type serine peptidase inhibitor domain 1 [Source:HGNC Symbol;Acc:HGNC:25460]"
ENSG00000135436;47;ENSG00000135436;FAM186B;0	461015238;0	20533472;0	458069478;-0	699578641;0	923131063;15	37359426;0 .;40 x 1;12 q13;"family with sequence similarity 186 member B [Source:HGNC Symbol;Acc:HGNC:25296]"
ENSG00000122180;131;ENSG00000122180;MYOG;0	733792473;0	289437164;0	349933582;-0	911955497;0	922982599;15	35689217;0 .;40 x 1;1 q32;"myogenin [Source:HGNC Symbol;Acc:HGNC:7612]"
ENSG00000100373;224;ENSG00000100373;UPK3A;-0	676605728;0	175257141;0	292561085;-0	587601952;0	922394096;15	2911395;0 .;40 x 3;22 q13;"uroplakin 3A [Source:HGNC Symbol;Acc:HGNC:12580]"
ENSG00000180758;485;ENSG00000180758;GPR157;-0	803805458;0	16010797;0	194714421;-0	523034532;0	92211234;15	25991277;0 .;38 x 3;1 p36;"G protein-coupled receptor 157 [Source:HGNC Symbol;Acc:HGNC:23687]"
ENSG00000169594;156;ENSG00000169594;BNC1;-0	619608266;0	170936669;0	328016952;-0	629249915;0	922108371;15	25947401;0 .;38 x 2;15 q25;"basonuclin 1 [Source:HGNC Symbol;Acc:HGNC:1081]"
ENSG00000176597;405;ENSG00000176597;B3GNT5;-0	675618609;0	225210805;0	223450466;-0	788849566;0	920737513;15	10984155;0 .;40 x 2;3 q27;"UDP-GlcNAc:betaGal beta-1	3-N-acetylglucosaminyltransferase 5 [Source:HGNC Symbol;Acc:HGNC:15684]"
ENSG00000158286;261;ENSG00000158286;RNF207;-0	792793717;0	236521322;0	278248618;-0	789880703;0	92035887;15	06916636;0 .;40 x 1;1 p36;"ring finger protein 207 [Source:HGNC Symbol;Acc:HGNC:32947]"
ENSG00000107807;399;ENSG00000107807;TLX1;0	241316749;0	23684048;0	224656221;-0	802492769;0	919971155;15	02780365;0 .;40 x 1;10 q24;"T-cell leukemia homeobox 1 [Source:HGNC Symbol;Acc:HGNC:5056]"
ENSG00000124074;183;ENSG00000124074;ENKD1;-0	910567328;0	231990745;0	312604669;-0	793082488;0	919960335;15	02665348;0 .;40 x 1;16 q22;"enkurin domain containing 1 [Source:HGNC Symbol;Acc:HGNC:25246]"
ENSG00000159761;184;ENSG00000159761;C16orf86;-0	910840552;0	231921286;0	312539961;-0	792933258;0	919955968;15	0261893;0 .;40 x 1;16 q22;"chromosome 16 open reading frame 86 [Source:HGNC Symbol;Acc:HGNC:33755]"
ENSG00000182938;440;ENSG00000182938;OTOP3;-0	799501559;0	246409554;0	206417498;-0	854035955;0	919937584;15	02423572;0 .;40 x 2;17 q25;"otopetrin 3 [Source:HGNC Symbol;Acc:HGNC:19658]"
ENSG00000110944;424;ENSG00000110944;IL23A;-0	450062003;0	170181283;0	2143947;-0	634944017;0	919684439;14	99740071;0 .;40 x 3;12 q13;"interleukin 23 subunit alpha [Source:HGNC Symbol;Acc:HGNC:15488]"
ENSG00000138771;429;ENSG00000138771;SHROOM3;-0	074759069;0	200009004;0	21085265;-0	731380233;0	91956925;14	9852301;0 .;39 x 1;4 q21;"shroom family member 3 [Source:HGNC Symbol;Acc:HGNC:30422]"
ENSG00000134259;501;ENSG00000134259;NGF;-0	886391235;0	212894837;0	188474107;-0	824861715;0	919407802;14	96821408;0 .;40 x 2;1 p13;"nerve growth factor [Source:HGNC Symbol;Acc:HGNC:7808]"
ENSG00000167874;487;ENSG00000167874;TMEM88;0	175244744;0	185653178;0	193539009;-0	599840301;0	919266424;14	95335348;0 .;38 x 1;17 p13;"transmembrane protein 88 [Source:HGNC Symbol;Acc:HGNC:32371]"
ENSG00000175591;591;ENSG00000175591;P2RY2;-0	111754088;0	119603052;0	130811651;-0	426329051;0	919227198;14	94923691;0 .;37 x 5;11 q13;"purinergic receptor P2Y2 [Source:HGNC Symbol;Acc:HGNC:8541]"
ENSG00000179178;572;ENSG00000179178;TMEM125;-0	775894678;0	155038357;0	152010234;-0	601884114;0	918291253;14	85185929;0 .;39 x 4;1 p34;"transmembrane protein 125 [Source:HGNC Symbol;Acc:HGNC:28275]"
ENSG00000078295;194;ENSG00000078295;ADCY2;-0	536013401;0	241906737;0	305804792;-1	105223097;0	916960808;14	71616095;0 .;40 x 1;5 p15;"adenylate cyclase 2 [Source:HGNC Symbol;Acc:HGNC:233]"
ENSG00000111012;589;ENSG00000111012;CYP27B1;0	038352619;0	113693872;0	132002872;-0	399957632;0	916723832;14	69231779;0 .;38 x 6;12 q14;"cytochrome P450 family 27 subfamily B member 1 [Source:HGNC Symbol;Acc:HGNC:2606]"
ENSG00000120318;143;ENSG00000120318;ARAP3;-0	499090309;0	290257616;0	338867592;-1	013545337;0	916412201;14	66111107;0 .;40 x 1;5 q31;"ArfGAP with RhoGAP domain	ankyrin repeat and PH domain 3 [Source:HGNC Symbol;Acc:HGNC:24097]"
ENSG00000180638;336;ENSG00000180638;SLC47A2;0	683659245;0	179144565;0	243367467;-0	583962222;0	916395836;14	65947681;0 .;40 x 3;17 p11;"solute carrier family 47 member 2 [Source:HGNC Symbol;Acc:HGNC:26439]"
ENSG00000167656;187;ENSG00000167656;LY6D;0	800258126;0	220443132;0	310946022;-0	651067536;0	915824349;14	60269541;0 .;40 x 2;8 q24;"lymphocyte antigen 6 family member D [Source:HGNC Symbol;Acc:HGNC:13348]"
ENSG00000049540;153;ENSG00000049540;ELN;-0	516711759;0	298455474;0	331058262;-1	043528446;0	915664305;14	58689291;0 .;40 x 1;7 q11;"elastin [Source:HGNC Symbol;Acc:HGNC:3327]"
ENSG00000138308;412;ENSG00000138308;PLA2G12B;0	827334801;0	195379954;0	218509982;-0	656397847;0	915298765;14	55096072;0 .;40 x 4;10 q22;"phospholipase A2 group XIIB [Source:HGNC Symbol;Acc:HGNC:18555]"
ENSG00000104941;459;ENSG00000104941;RSPH6A;-0	115690876;0	205982368;0	201618184;-0	674354558;0	914325313;14	45634612;0 .;39 x 1;19 q13;"radial spoke head 6 homolog A [Source:HGNC Symbol;Acc:HGNC:14241]"
ENSG00000124215;529;ENSG00000124215;CDH26;0	656517421;0	179066039;0	171483034;-0	593933018;0	913038089;14	33357349;0 .;38 x 1;20 q13;"cadherin 26 [Source:HGNC Symbol;Acc:HGNC:15902]"
ENSG00000145692;214;ENSG00000145692;BHMT;-0	500592045;0	275625148;0	297769366;-0	930619476;0	911557667;14	19555182;0 .;40 x 1;5 q14;"betaine--homocysteine S-methyltransferase [Source:HGNC Symbol;Acc:HGNC:1047]"
ENSG00000148346;468;ENSG00000148346;LCN2;0	632268593;0	135462155;0	199090695;-0	474017135;0	911023648;14	14657315;0 .;39 x 5;9 q34;"lipocalin 2 [Source:HGNC Symbol;Acc:HGNC:6526]"
ENSG00000177098;368;ENSG00000177098;SCN4B;-0	434078439;0	228346038;0	23266297;-0	721718089;0	910846609;14	1304284;0 .;39 x 1;11 q23;"sodium voltage-gated channel beta subunit 4 [Source:HGNC Symbol;Acc:HGNC:10592]"
ENSG00000125255;223;ENSG00000125255;SLC10A2;0	076474364;0	24370612;0	292693261;-0	878861684;0	910487297;14	09780201;0 .;40 x 1;13 q33;"solute carrier family 10 member 2 [Source:HGNC Symbol;Acc:HGNC:10906]"
ENSG00000161610;178;ENSG00000161610;HCRT;0	611703041;0	338213959;0	31408568;-1	299053057;0	910469011;14	09614657;0 .;40 x 1;17 q21;"hypocretin neuropeptide precursor [Source:HGNC Symbol;Acc:HGNC:4847]"
ENSG00000154474;597;ENSG00000154474;;-0	042963142;0	12578914;0	103326034;-0	42715218;0	909691863;14	0262362;0 .;37 x 5; ;
ENSG00000132692;273;ENSG00000132692;BCAN;-0	446615495;0	212769124;0	273156283;-0	816776622;0	90967585;14	02480474;0 .;40 x 1;1 q23;"brevican [Source:HGNC Symbol;Acc:HGNC:23059]"
ENSG00000106070;594;ENSG00000106070;GRB10;-0	982088144;0	118343677;0	111598784;-0	436096613;0	908996469;13	96440511;0 .;38 x 6;7 p12;"growth factor receptor bound protein 10 [Source:HGNC Symbol;Acc:HGNC:4564]"
ENSG00000103740;182;ENSG00000103740;ACSBG1;0	361049894;0	212984647;0	312621654;-0	737660951;0	908899925;13	95587423;0 .;40 x 1;15 q25;"acyl-CoA synthetase bubblegum family member 1 [Source:HGNC Symbol;Acc:HGNC:29567]"
ENSG00000165140;279;ENSG00000165140;FBP1;-0	752343107;0	179829835;0	270443068;-0	635931849;0	908682348;13	93669587;0 .;40 x 4;9 q22;"fructose-bisphosphatase 1 [Source:HGNC Symbol;Acc:HGNC:3606]"
ENSG00000152767;325;ENSG00000152767;FARP1;-0	949227253;0	268828173;0	247260961;-0	800229767;0	908574575;13	92722037;0 .;40 x 1;13 q32;"FERM	ARH/RhoGEF and pleckstrin domain protein 1 [Source:HGNC Symbol;Acc:HGNC:3591]"
ENSG00000166145;421;ENSG00000166145;SPINT1;-0	332707547;0	218576091;0	216311954;-0	80226138;0	908218626;13	89603787;0 .;40 x 3;15 q15;"serine peptidase inhibitor	Kunitz type 1 [Source:HGNC Symbol;Acc:HGNC:11246]"
ENSG00000088836;472;ENSG00000088836;SLC4A11;0	317119184;0	187200803;0	198141517;-0	589850463;0	908070773;13	88313618;0 .;40 x 4;20 p13;"solute carrier family 4 member 11 [Source:HGNC Symbol;Acc:HGNC:16438]"
ENSG00000163497;470;ENSG00000163497;FEV;-0	540865056;0	189989674;0	198952248;-0	730217664;0	907609187;13	84304763;0 .;40 x 4;2 q35;"FEV	ETS transcription factor [Source:HGNC Symbol;Acc:HGNC:18562]"
ENSG00000134013;450;ENSG00000134013;LOXL2;-0	596971646;0	12110432;0	20356864;-0	389110482;0	907461951;13	83032043;0 .;37 x 6;8 p21;"lysyl oxidase like 2 [Source:HGNC Symbol;Acc:HGNC:6666]"
ENSG00000134668;581;ENSG00000134668;SPOCD1;0	018011563;0	120261029;0	147140461;-0	385095469;0	907267467;13	81355321;0 .;36 x 5;1 p35;"SPOC domain containing 1 [Source:HGNC Symbol;Acc:HGNC:26338]"
ENSG00000116745;496;ENSG00000116745;RPE65;-0	246030941;0	185869141;0	18920061;-0	65898727;0	906823223;13	77544074;0 .;40 x 3;1 p31;"RPE65	retinoid isomerohydrolase [Source:HGNC Symbol;Acc:HGNC:10294]"
ENSG00000142182;482;ENSG00000142182;DNMT3L;-0	254810387;0	166701284;0	195713637;-0	589083167;0	906309478;13	73168769;0 .;40 x 4;21 q22;"DNA methyltransferase 3 like [Source:HGNC Symbol;Acc:HGNC:2980]"
ENSG00000187553;73;ENSG00000187553;CYP26C1;0	472112546;0	206102806;0	405977426;-0	680606473;0	906044765;13	70927676;0 .;40 x 1;10 q23;"cytochrome P450 family 26 subfamily C member 1 [Source:HGNC Symbol;Acc:HGNC:20577]"
ENSG00000088367;499;ENSG00000088367;EPB41L1;0	767188145;0	146230573;0	188535038;-0	521813942;0	906017776;13	7069969;0 .;37 x 3;20 q11;"erythrocyte membrane protein band 4.1 like 1 [Source:HGNC Symbol;Acc:HGNC:3378]"
ENSG00000162676;63;ENSG00000162676;GFI1;-0	552746422;0	197899003;0	419458083;-0	686672;0	905960647;13	70217405;0 .;40 x 2;1 p22;"growth factor independent 1 transcriptional repressor [Source:HGNC Symbol;Acc:HGNC:4237]"
ENSG00000156574;11;ENSG00000156574;NODAL;0	034414052;0	286559733;0	666287222;-0	939740786;0	905707432;13	68084792;0 .;40 x 1;10 q22;"nodal growth differentiation factor [Source:HGNC Symbol;Acc:HGNC:7865]"
ENSG00000108839;12;ENSG00000108839;ALOX12;-0	071545671;0	458055751;0	654259302;-1	673499393;0	904990775;13	62092978;0 .;40 x 1;17 p13;"arachidonate 12-lipoxygenase	12S type [Source:HGNC Symbol;Acc:HGNC:429]"
ENSG00000166869;596;ENSG00000166869;CHP2;-0	248357712;0	153366617;0	108899572;-0	559054124;0	904860821;13	61013364;0 .;37 x 2;16 p12;"calcineurin like EF-hand protein 2 [Source:HGNC Symbol;Acc:HGNC:24927]"
ENSG00000169435;553;ENSG00000169435;RASSF6;-0	30108025;0	155896647;0	164516526;-0	482815855;0	904545635;13	58403593;0 .;40 x 5;4 q13;"Ras association domain family member 6 [Source:HGNC Symbol;Acc:HGNC:20796]"
ENSG00000167941;427;ENSG00000167941;SOST;0	797616372;0	18327694;0	212444451;-0	62207699;0	903524712;13	50033866;0 .;40 x 3;17 q21;"sclerostin [Source:HGNC Symbol;Acc:HGNC:13771]"
ENSG00000143409;371;ENSG00000143409;MINDY1;-0	966039089;0	204914334;0	232287028;-0	661796572;0	902663286;13	43069225;0 .;40 x 3;1 q21;"MINDY lysine 48 deubiquitinase 1 [Source:HGNC Symbol;Acc:HGNC:25648]"
ENSG00000109625;110;ENSG00000109625;CPZ;-0	964081204;0	298651142;0	361626979;-0	956592002;0	902412434;13	4105756;0 .;40 x 1;4 p16;"carboxypeptidase Z [Source:HGNC Symbol;Acc:HGNC:2333]"
ENSG00000130707;102;ENSG00000130707;ASS1;-0	825509611;0	182719429;0	367853246;-0	68178266;0	902029402;13	38000047;0 .;40 x 3;9 q34;"argininosuccinate synthase 1 [Source:HGNC Symbol;Acc:HGNC:758]"
ENSG00000170190;497;ENSG00000170190;SLC16A5;-0	201030047;0	178499337;0	188845489;-0	536000911;0	901833339;13	36441569;0 .;40 x 4;17 q25;"solute carrier family 16 member 5 [Source:HGNC Symbol;Acc:HGNC:10926]"
ENSG00000179761;400;ENSG00000179761;PIPOX;-0	485557764;0	205772485;0	224632066;-0	699503434;0	900611751;13	26830094;1.11022302462516e-16 .;38 x 1;17 q11;"pipecolic acid and sarcosine oxidase [Source:HGNC Symbol;Acc:HGNC:17804]"
ENSG00000166250;89;ENSG00000166250;CLMP;-0	513755722;0	177864943;0	383540418;-0	606997584;0	900426362;13	25386123;1.11022302462516e-16 .;40 x 4;11 q24;"CXADR like membrane protein [Source:HGNC Symbol;Acc:HGNC:24039]"
ENSG00000184254;296;ENSG00000184254;ALDH1A3;-0	514200367;0	22533744;0	260997239;-0	680324984;0	90042368;13	25365264;1.11022302462516e-16 .;40 x 1;15 q26;"aldehyde dehydrogenase 1 family member A3 [Source:HGNC Symbol;Acc:HGNC:409]"
ENSG00000197971;533;ENSG00000197971;MBP;-0	233603332;0	165132299;0	170927635;-0	613246496;0	900280295;13	24251119;1.11022302462516e-16 .;38 x 3;18 q23;"myelin basic protein [Source:HGNC Symbol;Acc:HGNC:6925]"
ENSG00000104903;562;ENSG00000104903;LYL1;-0	261935139;0	119688077;0	160176484;-0	36726526;0	900140178;13	23164564;1.11022302462516e-16 .;37 x 6;19 p13;"LYL1	basic helix-loop-helix family member [Source:HGNC Symbol;Acc:HGNC:6734]"
ENSG00000118849;161;ENSG00000118849;RARRES1;-0	535613606;0	217575939;0	326843289;-0	848267876;0	899125267;13	15358466;1.11022302462516e-16 .;40 x 1;3 q25;"retinoic acid receptor responder 1 [Source:HGNC Symbol;Acc:HGNC:9867]"
ENSG00000124134;518;ENSG00000124134;KCNS1;-0	270972519;0	138515775;0	179041483;-0	452285738;0	898828665;13	13098218;2.22044604925031e-16 .;36 x 3;20 q13;"potassium voltage-gated channel modifier subfamily S member 1 [Source:HGNC Symbol;Acc:HGNC:6300]"
ENSG00000105371;441;ENSG00000105371;ICAM4;-0	539505207;0	203706627;0	206353309;-0	676802669;0	898207891;13	08397938;2.22044604925031e-16 .;40 x 4;19 p13;"intercellular adhesion molecule 4 (Landsteiner-Wiener blood group) [Source:HGNC Symbol;Acc:HGNC:5347]"
ENSG00000132698;382;ENSG00000132698;RAB25;0	206689779;0	153747587;0	230190464;-0	526580519;0	896303369;12	942278;2.22044604925031e-16 .;40 x 5;1 q22;"RAB25	member RAS oncogene family [Source:HGNC Symbol;Acc:HGNC:18238]"
ENSG00000182795;545;ENSG00000182795;C1orf116;0	59323793;0	118367783;0	167418047;-0	429423723;0	895424353;12	87811566;2.22044604925031e-16 .;36 x 5;1 q32;"chromosome 1 open reading frame 116 [Source:HGNC Symbol;Acc:HGNC:28667]"
ENSG00000051523;118;ENSG00000051523;CYBA;-0	317169122;0	318582047;0	358420145;-1	091847859;0	894598482;12	81852512;3.33066907387547e-16 .;40 x 1;16 q24;"cytochrome b-245 alpha chain [Source:HGNC Symbol;Acc:HGNC:2577]"
ENSG00000129465;387;ENSG00000129465;RIPK3;0	082439542;0	201055719;0	227317076;-0	60149413;0	893505254;12	74065306;4.44089209850063e-16 .;40 x 4;14 q12;"receptor interacting serine/threonine kinase 3 [Source:HGNC Symbol;Acc:HGNC:10021]"
ENSG00000117971;16;ENSG00000117971;CHRNB4;-0	470251396;0	238685255;0	618425012;-0	719811639;0	89312586;12	71389239;4.44089209850063e-16 .;40 x 1;15 q25;"cholinergic receptor nicotinic beta 4 subunit [Source:HGNC Symbol;Acc:HGNC:1964]"
ENSG00000120913;592;ENSG00000120913;PDLIM2;-0	267551787;0	133326692;0	12614873;-0	489262278;0	893117867;12	71333006;4.44089209850063e-16 .;38 x 5;8 p21;"PDZ and LIM domain 2 [Source:HGNC Symbol;Acc:HGNC:13992]"
ENSG00000012223;230;ENSG00000012223;LTF;-0	570056211;0	222745204;0	290039069;-0	945038142;0	892497423;12	66985992;4.44089209850063e-16 .;40 x 2;3 p21;"lactotransferrin [Source:HGNC Symbol;Acc:HGNC:6720]"
ENSG00000168487;370;ENSG00000168487;BMP1;-0	724688043;0	218196766;0	232629205;-0	799670997;0	89241352;12	66400868;4.44089209850063e-16 .;39 x 1;8 p21;"bone morphogenetic protein 1 [Source:HGNC Symbol;Acc:HGNC:1067]"
ENSG00000074966;474;ENSG00000074966;TXK;0	092026722;0	255890318;0	197179212;-0	930668754;0	891864318;12	62586705;4.44089209850063e-16 .;40 x 3;4 p12;"TXK tyrosine kinase [Source:HGNC Symbol;Acc:HGNC:12434]"
ENSG00000184988;26;ENSG00000184988;TMEM106A;-0	068089094;0	277605689;0	558065834;-0	925137151;0	891644847;12	61070152;5.55111512312578e-16 .;40 x 1;17 q21;"transmembrane protein 106A [Source:HGNC Symbol;Acc:HGNC:28288]"
ENSG00000160606;264;ENSG00000160606;TLCD1;-0	650006135;0	158972725;0	277155237;-0	536569029;0	891495388;12	60039867;5.55111512312578e-16 .;37 x 3;17 q11;"TLC domain containing 1 [Source:HGNC Symbol;Acc:HGNC:25177]"
ENSG00000197353;340;ENSG00000197353;LYPD2;0	804255164;0	202079698;0	241589619;-0	61818899;0	890992472;12	5658774;6.66133814775094e-16 .;40 x 2;8 q24;"LY6/PLAUR domain containing 2 [Source:HGNC Symbol;Acc:HGNC:25215]"
ENSG00000121742;334;ENSG00000121742;GJB6;-0	267191667;0	223521679;0	243477232;-0	672342016;0	890788273;12	55192492;6.66133814775094e-16 .;39 x 1;13 q12;"gap junction protein beta 6 [Source:HGNC Symbol;Acc:HGNC:4288]"
ENSG00000183888;524;ENSG00000183888;C1orf64;0	348833136;0	170767016;0	175123333;-0	539973993;0	890689685;12	54520177;6.66133814775094e-16 .;40 x 4;1 p36;"chromosome 1 open reading frame 64 [Source:HGNC Symbol;Acc:HGNC:28339]"
ENSG00000100557;358;ENSG00000100557;C14orf105;0	094288649;0	164058355;0	236161774;-0	588628858;0	890562459;12	53653839;6.66133814775094e-16 .;40 x 4;14 q22;"chromosome 14 open reading frame 105 [Source:HGNC Symbol;Acc:HGNC:20189]"
ENSG00000167087;158;ENSG00000167087;;0	012858356;0	181911984;0	327815117;-0	583270702;0	890412962;12	52637662;6.66133814775094e-16 .;39 x 1; ;
ENSG00000213784;157;ENSG00000213784;;0	01250517;0	181899841;0	327856232;-0	58321476;0	890394724;12	52513822;6.66133814775094e-16 .;39 x 1; ;
ENSG00000180066;401;ENSG00000180066;;0	350269185;0	172378946;0	224544088;-0	500146429;0	890048537;12	50168739;6.66133814775094e-16 .;37 x 1;10 q26;"chromosome 10 open reading frame 91 [Source:HGNC Symbol;Acc:HGNC:27275]"
ENSG00000175592;354;ENSG00000175592;FOSL1;-0	516325669;0	206199028;0	237036037;-0	75771771;0	889291273;12	45075168;8.88178419700125e-16 .;39 x 1;11 q13;"FOS like 1	AP-1 transcription factor subunit [Source:HGNC Symbol;Acc:HGNC:13718]"
ENSG00000133256;86;ENSG00000133256;PDE6B;0	323989608;0	230840647;0	388982563;-0	733431001;0	888972746;12	4294734;8.88178419700125e-16 .;40 x 1;4 p16;"phosphodiesterase 6B [Source:HGNC Symbol;Acc:HGNC:8786]"
ENSG00000064547;246;ENSG00000064547;LPAR2;-0	491786599;0	23066422;0	283016282;-0	807506417;0	888944197;12	42757052;8.88178419700125e-16 .;40 x 3;19 p13;"lysophosphatidic acid receptor 2 [Source:HGNC Symbol;Acc:HGNC:3168]"
ENSG00000196966;75;ENSG00000196966;;-0	89995177;0	338422773;0	400714299;-1	131280786;0	888892632;12	4241352;8.88178419700125e-16 .;40 x 1; ;
ENSG00000100122;540;ENSG00000100122;CRYBB1;0	594448747;0	128512949;0	169217782;-0	464844181;0	888870711;12	42267545;8.88178419700125e-16 .;38 x 6;22 q12;"crystallin beta B1 [Source:HGNC Symbol;Acc:HGNC:2397]"
ENSG00000113520;410;ENSG00000113520;IL4;0	802685885;0	164649035;0	218787883;-0	589918967;0	888673144;12	40953792;8.88178419700125e-16 .;38 x 2;5 q31;"interleukin 4 [Source:HGNC Symbol;Acc:HGNC:6014]"
ENSG00000121075;531;ENSG00000121075;TBX4;-0	258899605;0	126275758;0	171139601;-0	452688515;0	888500138;12	39806055;8.88178419700125e-16 .;37 x 5;17 q23;"T-box 4 [Source:HGNC Symbol;Acc:HGNC:11603]"
ENSG00000163959;152;ENSG00000163959;SLC51A;0	471374621;0	169524642;0	331209062;-0	602096862;0	888497293;12	39787198;8.88178419700125e-16 .;38 x 2;3 q29;"solute carrier family 51 alpha subunit [Source:HGNC Symbol;Acc:HGNC:29955]"
ENSG00000180008;481;ENSG00000180008;SOCS4;-0	631863303;0	175365497;0	196029588;-0	634457295;0	887713817;12	34621032;1.11022302462516e-15 .;40 x 5;14 q22;"suppressor of cytokine signaling 4 [Source:HGNC Symbol;Acc:HGNC:19392]"
ENSG00000163132;548;ENSG00000163132;MSX1;-1	013610247;0	156328729;0	166432426;-0	532351025;0	887089795;12	30542535;1.11022302462516e-15 .;39 x 4;4 p16;"msh homeobox 1 [Source:HGNC Symbol;Acc:HGNC:7391]"
ENSG00000204248;494;ENSG00000204248;COL11A2;-0	782834027;0	162423337;0	189962734;-0	536813265;0	887074369;12	30442117;1.22124532708767e-15 .;37 x 2;6 p21;"collagen type XI alpha 2 chain [Source:HGNC Symbol;Acc:HGNC:2187]"
ENSG00000170454;503;ENSG00000170454;KRT75;0	525848683;0	160248492;0	187697304;-0	509547265;0	886704752;12	28041788;1.33226762955019e-15 .;38 x 3;12 q13;"keratin 75 [Source:HGNC Symbol;Acc:HGNC:24431]"
ENSG00000117298;541;ENSG00000117298;ECE1;-0	546777452;0	130819762;0	169154472;-0	529267105;0	886486601;12	26630267;1.33226762955019e-15 .;35 x 3;1 p36;"endothelin converting enzyme 1 [Source:HGNC Symbol;Acc:HGNC:3146]"
ENSG00000010030;38;ENSG00000010030;ETV7;-0	291144808;0	242781266;0	48735215;-0	786166966;0	886049503;12	23813554;1.4432899320127e-15 .;40 x 1;6 p21;"ETS variant 7 [Source:HGNC Symbol;Acc:HGNC:18160]"
ENSG00000113722;547;ENSG00000113722;CDX1;0	616823198;0	134952732;0	166863484;-0	474932998;0	886025921;12	23662023;1.4432899320127e-15 .;37 x 5;5 q32;"caudal type homeobox 1 [Source:HGNC Symbol;Acc:HGNC:1805]"
ENSG00000169717;432;ENSG00000169717;ACTRT2;0	370668088;0	154771592;0	210419769;-0	473152654;0	885934502;12	23075002;1.4432899320127e-15 .;39 x 4;1 p36;"actin related protein T2 [Source:HGNC Symbol;Acc:HGNC:24026]"
ENSG00000145794;404;ENSG00000145794;MEGF10;-0	939349528;0	23275186;0	223535281;-0	722378088;0	884901705;12	16488932;1.77635683940025e-15 .;40 x 2;5 q23;"multiple EGF like domains 10 [Source:HGNC Symbol;Acc:HGNC:29634]"
ENSG00000134470;426;ENSG00000134470;IL15RA;-0	572812874;0	155599522;0	213415971;-0	559385261;0	884772089;12	15668257;1.77635683940025e-15 .;38 x 4;10 p15;"interleukin 15 receptor subunit alpha [Source:HGNC Symbol;Acc:HGNC:5978]"
ENSG00000161653;195;ENSG00000161653;NAGS;-0	858732799;0	253566506;0	305187715;-0	805904611;0	884453764;12	13658267;1.88737914186277e-15 .;40 x 1;17 q21;"N-acetylglutamate synthase [Source:HGNC Symbol;Acc:HGNC:17996]"
ENSG00000162344;243;ENSG00000162344;FGF19;-0	798836273;0	295721038;0	28524212;-1	020329138;0	884117674;12	11544544;1.99840144432528e-15 .;40 x 2;11 q13;"fibroblast growth factor 19 [Source:HGNC Symbol;Acc:HGNC:3675]"
ENSG00000105427;285;ENSG00000105427;CNFN;-0	109947259;0	144895073;0	265289097;-0	440403634;0	883897974;12	10167479;1.99840144432528e-15 .;37 x 4;19 q13;"cornifelin [Source:HGNC Symbol;Acc:HGNC:30183]"
ENSG00000023892;517;ENSG00000023892;DEF6;-0	011139984;0	151772075;0	179527549;-0	51832082;0	883848271;12	09856452;1.99840144432528e-15 .;36 x 2;6 p21;"DEF6	guanine nucleotide exchange factor [Source:HGNC Symbol;Acc:HGNC:2760]"
ENSG00000169026;491;ENSG00000169026;MFSD7;-0	220846594;0	12009604;0	191087445;-0	330754625;0	883567879;12	08105342;2.22044604925031e-15 .;36 x 5;4 p16;"major facilitator superfamily domain containing 7 [Source:HGNC Symbol;Acc:HGNC:26177]"
ENSG00000167553;463;ENSG00000167553;TUBA1C;-0	670286781;0	163930655;0	20017146;-0	624819302;0	88353409;12	07894722;2.22044604925031e-15 .;40 x 4;12 q13;"tubulin alpha 1c [Source:HGNC Symbol;Acc:HGNC:20768]"
ENSG00000160181;585;ENSG00000160181;TFF2;0	583731363;0	126853593;0	139701097;-0	362807378;0	883240799;12	06070143;2.22044604925031e-15 .;37 x 5;21 q22;"trefoil factor 2 [Source:HGNC Symbol;Acc:HGNC:11756]"
ENSG00000176490;211;ENSG00000176490;DIRAS1;-0	410886415;0	267869362;0	29862602;-0	835185861;0	883075445;12	05044305;2.33146835171283e-15 .;39 x 1;19 p13;"DIRAS family GTPase 1 [Source:HGNC Symbol;Acc:HGNC:19127]"
ENSG00000087245;538;ENSG00000087245;MMP2;-0	977157837;0	152461501;0	170307049;-0	522350339;0	883030959;12	04768669;2.44249065417534e-15 .;36 x 1;16 q12;"matrix metallopeptidase 2 [Source:HGNC Symbol;Acc:HGNC:7166]"
ENSG00000076706;127;ENSG00000076706;MCAM;-0	850580974;0	1621388;0	351683825;-0	501398724;0	88298059;12	04456758;2.44249065417534e-15 .;38 x 4;11 q23;"melanoma cell adhesion molecule [Source:HGNC Symbol;Acc:HGNC:6934]"
ENSG00000108639;317;ENSG00000108639;SYNGR2;0	242563731;0	149886206;0	251393982;-0	473895653;0	882664363;12	02502816;2.44249065417534e-15 .;39 x 5;17 q25;"synaptogyrin 2 [Source:HGNC Symbol;Acc:HGNC:11499]"
ENSG00000124664;554;ENSG00000124664;SPDEF;0	757897304;0	131189306;0	164142192;-0	411102181;0	882432193;12	01072965;2.66453525910038e-15 .;37 x 5;6 p21;"SAM pointed domain containing ETS transcription factor [Source:HGNC Symbol;Acc:HGNC:17257]"
ENSG00000087494;510;ENSG00000087494;PTHLH;0	141170706;0	166895389;0	183612224;-0	534982736;0	882227854;11	99817803;2.66453525910038e-15 .;37 x 1;12 p11;"parathyroid hormone like hormone [Source:HGNC Symbol;Acc:HGNC:9607]"
ENSG00000128594;76;ENSG00000128594;LRRC4;-0	577700811;0	267401891;0	40069462;-0	909071116;0	882045231;11	98698618;2.77555756156289e-15 .;40 x 1;7 q32;"leucine rich repeat containing 4 [Source:HGNC Symbol;Acc:HGNC:15586]"
ENSG00000213694;394;ENSG00000213694;S1PR3;-1	021461508;0	203193509;0	225394145;-0	71445979;0	88105991;11	92701931;3.33066907387547e-15 .;40 x 2;9 q22;"sphingosine-1-phosphate receptor 3 [Source:HGNC Symbol;Acc:HGNC:3167]"
ENSG00000186354;393;ENSG00000186354;C9orf47;-1	021217793;0	203260824;0	2254861;-0	714587174;0	881014492;11	92427201;3.33066907387547e-15 .;40 x 2;9 q22;"chromosome 9 open reading frame 47 [Source:HGNC Symbol;Acc:HGNC:23669]"
ENSG00000105641;169;ENSG00000105641;SLC5A5;-0	879230626;0	254601877;0	320668416;-0	72961994;0	880615984;11	90022957;3.5527136788005e-15 .;40 x 1;19 p13;"solute carrier family 5 member 5 [Source:HGNC Symbol;Acc:HGNC:11040]"
ENSG00000119614;120;ENSG00000119614;VSX2;-0	636478973;0	180703498;0	357578988;-0	63074542;0	879292384;11	82117715;4.32986979603811e-15 .;38 x 1;14 q24;"visual system homeobox 2 [Source:HGNC Symbol;Acc:HGNC:1975]"
ENSG00000187021;380;ENSG00000187021;PNLIPRP1;0	78062381;0	137150088;0	2304844;-0	391606127;0	878898708;11	79789925;4.66293670342566e-15 .;37 x 4;10 q25;"pancreatic lipase related protein 1 [Source:HGNC Symbol;Acc:HGNC:9156]"
ENSG00000136535;67;ENSG00000136535;TBR1;-0	382731486;0	236121019;0	417635889;-0	78616203;0	87867853;11	7849264;4.77395900588817e-15 .;39 x 1;2 q24;"T-box	brain 1 [Source:HGNC Symbol;Acc:HGNC:11590]"
ENSG00000146618;234;ENSG00000146618;FERD3L;-0	680273116;0	217683516;0	289684668;-0	816755624;0	878673558;11	78463387;4.77395900588817e-15 .;40 x 3;7 p21;"Fer3 like bHLH transcription factor [Source:HGNC Symbol;Acc:HGNC:16660]"
ENSG00000162882;18;ENSG00000162882;HAAO;-0	107791087;0	231608801;0	589965927;-0	72712432;0	878582953;11	77930536;4.88498130835069e-15 .;40 x 2;2 p21;"3-hydroxyanthranilate 3	4-dioxygenase [Source:HGNC Symbol;Acc:HGNC:4796]"
ENSG00000084674;483;ENSG00000084674;APOB;-0	565358273;0	138242901;0	195578031;-0	468917031;0	87854675;11	77717777;4.88498130835069e-15 .;40 x 6;2 p24;"apolipoprotein B [Source:HGNC Symbol;Acc:HGNC:603]"
ENSG00000173530;430;ENSG00000173530;TNFRSF10D;-0	706401792;0	214215104;0	210514091;-0	77989848;0	878305675;11	76303309;5.10702591327572e-15 .;40 x 1;8 p21;"TNF receptor superfamily member 10d [Source:HGNC Symbol;Acc:HGNC:11907]"
ENSG00000172426;557;ENSG00000172426;RSPH9;-0	449094942;0	16919674;0	161963374;-0	529467439;0	877378147;11	70897624;5.88418203051333e-15 .;37 x 1;6 p21;"radial spoke head 9 homolog [Source:HGNC Symbol;Acc:HGNC:21057]"
ENSG00000154016;536;ENSG00000154016;GRAP;-0	135677162;0	130832261;0	170581565;-0	444662449;0	877376735;11	70889438;5.88418203051333e-15 .;40 x 7;17 p11;"GRB2-related adaptor protein [Source:HGNC Symbol;Acc:HGNC:4562]"
ENSG00000109113;457;ENSG00000109113;RAB34;-0	881935785;0	186804136;0	202206901;-0	622957844;0	877198552;11	69857559;5.99520433297585e-15 .;36 x 1;17 q11;"RAB34	member RAS oncogene family [Source:HGNC Symbol;Acc:HGNC:16519]"
ENSG00000157765;323;ENSG00000157765;SLC34A2;-0	334917848;0	165222256;0	249250647;-0	533441521;0	877030842;11	68888242;6.21724893790088e-15 .;40 x 4;4 p15;"solute carrier family 34 member 2 [Source:HGNC Symbol;Acc:HGNC:11020]"
ENSG00000154309;272;ENSG00000154309;DISP1;-0	26654929;0	276222649;0	273205047;-0	964519233;0	876613012;11	66481346;6.66133814775094e-15 .;40 x 1;1 q41;"dispatched RND transporter family member 1 [Source:HGNC Symbol;Acc:HGNC:19711]"
ENSG00000088386;361;ENSG00000088386;SLC15A1;-0	675611108;0	163424466;0	235765235;-0	502288203;0	876535014;11	66033306;6.66133814775094e-15 .;38 x 3;13 q32;"solute carrier family 15 member 1 [Source:HGNC Symbol;Acc:HGNC:10920]"
ENSG00000157992;167;ENSG00000157992;KRTCAP3;-0	177614669;0	175748201;0	32255269;-0	607847623;0	875371434;11	59396145;7.99360577730113e-15 .;40 x 4;2 p23;"keratinocyte associated protein 3 [Source:HGNC Symbol;Acc:HGNC:28943]"
ENSG00000173848;150;ENSG00000173848;NET1;-0	271660866;0	266377347;0	332427556;-0	82186525;0	874891533;11	56683969;8.65973959207622e-15 .;39 x 1;10 p15;"neuroepithelial cell transforming 1 [Source:HGNC Symbol;Acc:HGNC:14592]"
ENSG00000135480;377;ENSG00000135480;KRT7;-0	711539136;0	160872804;0	23061543;-0	48722436;0	874836581;11	56374337;8.65973959207622e-15 .;38 x 3;12 q13;"keratin 7 [Source:HGNC Symbol;Acc:HGNC:6445]"
ENSG00000161544;335;ENSG00000161544;CYGB;-0	635717931;0	165904775;0	243371357;-0	535587984;0	874518237;11	54584325;9.10382880192628e-15 .;40 x 4;17 q25;"cytoglobin [Source:HGNC Symbol;Acc:HGNC:16505]"
ENSG00000116819;500;ENSG00000116819;TFAP2E;-0	258502377;0	171878443;0	188518572;-0	572134085;0	874275157;11	53221795;9.54791801177635e-15 .;38 x 2;1 p34;"transcription factor AP-2 epsilon [Source:HGNC Symbol;Acc:HGNC:30774]"
ENSG00000171551;128;ENSG00000171551;ECEL1;0	287766997;0	164160727;0	351591483;-0	510869826;0	873769169;11	50397369;1.02140518265514e-14 .;38 x 4;2 q37;"endothelin converting enzyme like 1 [Source:HGNC Symbol;Acc:HGNC:3147]"
ENSG00000188505;420;ENSG00000188505;NCCRP1;-0	614537263;0	149218474;0	216491212;-0	417648018;0	873563056;11	49251384;1.06581410364015e-14 .;37 x 4;19 q13;"non-specific cytotoxic cell receptor protein 1 homolog (zebrafish) [Source:HGNC Symbol;Acc:HGNC:33739]"
ENSG00000197355;561;ENSG00000197355;UAP1L1;-0	363594993;0	133532085;0	160772314;-0	557708379;0	873213018;11	47311149;1.12132525487141e-14 .;35 x 3;9 q34;"UDP-N-acetylglucosamine pyrophosphorylase 1 like 1 [Source:HGNC Symbol;Acc:HGNC:28082]"
ENSG00000170279;409;ENSG00000170279;C7orf33;0	270931507;0	231246813;0	220097747;-0	811796656;0	873202442;11	47252646;1.12132525487141e-14 .;40 x 3;7 q36;"chromosome 7 open reading frame 33 [Source:HGNC Symbol;Acc:HGNC:21724]"
ENSG00000178217;374;ENSG00000178217;SH2D4B;0	310964367;0	146550965;0	231401332;-0	433643668;0	873134792;11	46878576;1.13242748511766e-14 .;39 x 5;10 q23;"SH2 domain containing 4B [Source:HGNC Symbol;Acc:HGNC:31440]"
ENSG00000124827;320;ENSG00000124827;GCM2;-0	717654147;0	195162818;0	249750442;-0	57384973;0	872572298;11	43779022;1.23234755733392e-14 .;40 x 1;6 p24;"glial cells missing homolog 2 [Source:HGNC Symbol;Acc:HGNC:4198]"
ENSG00000104635;492;ENSG00000104635;SLC39A14;0	029199309;0	147018441;0	191003653;-0	381047223;0	872478772;11	43265515;1.24344978758018e-14 .;37 x 3;8 p21;"solute carrier family 39 member 14 [Source:HGNC Symbol;Acc:HGNC:20858]"
ENSG00000165752;575;ENSG00000165752;STK32C;-0	943787093;0	14342249;0	14906739;-0	469315815;0	872478035;11	43261471;1.24344978758018e-14 .;37 x 3;10 q26;"serine/threonine kinase 32C [Source:HGNC Symbol;Acc:HGNC:21332]"
ENSG00000099994;568;ENSG00000099994;SUSD2;0	102131634;0	171696972;0	154665367;-0	595035243;0	871948958;11	40366448;1.35447209004269e-14 .;40 x 5;22 q11;"sushi domain containing 2 [Source:HGNC Symbol;Acc:HGNC:30667]"
ENSG00000174348;112;ENSG00000174348;PODN;-0	400472193;0	253649623;0	361035887;-0	765807382;0	871777427;11	39431446;1.38777878078145e-14 .;39 x 1;1 p32;"podocan [Source:HGNC Symbol;Acc:HGNC:23174]"
ENSG00000129749;489;ENSG00000129749;CHRNA10;0	40100747;0	132121527;0	192965539;-0	414993497;0	871417521;11	37475294;1.46549439250521e-14 .;39 x 6;11 p15;"cholinergic receptor nicotinic alpha 10 subunit [Source:HGNC Symbol;Acc:HGNC:13800]"
ENSG00000073067;462;ENSG00000073067;CYP2W1;0	507780129;0	135716029;0	200974469;-0	477747967;0	871207053;11	36334908;1.50990331349021e-14 .;39 x 6;7 p22;"cytochrome P450 family 2 subfamily W member 1 [Source:HGNC Symbol;Acc:HGNC:20243]"
ENSG00000128602;219;ENSG00000128602;SMO;-0	951936851;0	123487097;0	293933297;-0	456112168;0	870829772;11	34297167;1.59872115546023e-14 .;37 x 6;7 q32;"smoothened	frizzled class receptor [Source:HGNC Symbol;Acc:HGNC:11119]"
ENSG00000100302;229;ENSG00000100302;RASD2;-1	085406752;0	223418455;0	290339163;-0	663058757;0	87024943;11	31178842;1.7430501486615e-14 .;38 x 1;22 q12;"RASD family member 2 [Source:HGNC Symbol;Acc:HGNC:18229]"
ENSG00000223011;392;ENSG00000223011;;-0	630704129;0	215372202;0	225660499;-0	548114215;0	869770138;11	28618128;1.86517468137026e-14 .;37 x 1; ;
ENSG00000159113;92;ENSG00000159113;;-0	682217208;0	283904908;0	379241322;-0	971196345;0	869649254;11	27974359;1.90958360235527e-14 .;40 x 2; ;
ENSG00000080573;268;ENSG00000080573;COL5A3;-0	84802206;0	244600239;0	275542054;-0	917501956;0	869515073;11	27260747;1.94289029309402e-14 .;40 x 1;19 p13;"collagen type V alpha 3 chain [Source:HGNC Symbol;Acc:HGNC:14864]"
ENSG00000173917;473;ENSG00000173917;HOXB2;-0	667321547;0	111615777;0	197599082;-0	399795612;0	868534844;11	22078506;2.24265050974282e-14 .;36 x 6;17 q21;"homeobox B2 [Source:HGNC Symbol;Acc:HGNC:5113]"
ENSG00000139269;365;ENSG00000139269;INHBE;0	391161924;0	134295105;0	233908175;-0	458839526;0	868403203;11	21386659;2.28705943072782e-14 .;40 x 6;12 q13;"inhibin beta E subunit [Source:HGNC Symbol;Acc:HGNC:24029]"
ENSG00000168071;514;ENSG00000168071;CCDC88B;0	957939298;0	159855308;0	181122191;-0	599765445;0	868301831;11	20854546;2.32036612146658e-14 .;40 x 5;11 q13;"coiled-coil domain containing 88B [Source:HGNC Symbol;Acc:HGNC:26757]"
ENSG00000115488;580;ENSG00000115488;NEU2;0	812383676;0	122672478;0	147317009;-0	438638277;0	868118493;11	19893632;2.38697950294409e-14 .;35 x 4;2 q37;"neuraminidase 2 [Source:HGNC Symbol;Acc:HGNC:7759]"
ENSG00000090534;504;ENSG00000090534;THPO;0	607090671;0	120666336;0	186302594;-0	427379559;0	867254367;11	15389524;2.70894418008538e-14 .;35 x 4;3 q27;"thrombopoietin [Source:HGNC Symbol;Acc:HGNC:11795]"
ENSG00000164007;59;ENSG00000164007;CLDN19;0	642667247;0	148801447;0	428946482;-0	462065527;0	866985098;11	13994346;2.80886425230165e-14 .;38 x 5;1 p34;"claudin 19 [Source:HGNC Symbol;Acc:HGNC:2040]"
ENSG00000140285;106;ENSG00000140285;FGF7;-0	347786754;0	282056678;0	363722535;-0	92310337;0	865712587;11	07453845;3.37507799486048e-14 .;40 x 2;15 q21;"fibroblast growth factor 7 [Source:HGNC Symbol;Acc:HGNC:3685]"
ENSG00000168334;584;ENSG00000168334;XIRP1;0	757904489;0	124028028;0	145119606;-0	448768821;0	86536298;11	05672017;3.5527136788005e-14 .;38 x 6;3 p22;"xin actin binding repeat containing 1 [Source:HGNC Symbol;Acc:HGNC:14301]"
ENSG00000188756;248;ENSG00000188756;;-1	028114397;0	229381693;0	28282393;-0	669739249;0	865196777;11	04827192;3.63042929052426e-14 .;40 x 1; ;
ENSG00000213366;247;ENSG00000213366;GSTM2;-1	027888984;0	229443402;0	282927094;-0	669787283;0	865155574;11	04617977;3.65263375101677e-14 .;40 x 1;1 p13;"glutathione S-transferase mu 2 [Source:HGNC Symbol;Acc:HGNC:4634]"
ENSG00000172828;520;ENSG00000172828;CES3;0	568663507;0	191938917;0	177015985;-0	619504865;0	864829321;11	0296452;3.81916720471054e-14 .;37 x 1;16 q22;"carboxylesterase 3 [Source:HGNC Symbol;Acc:HGNC:1865]"
ENSG00000153807;27;ENSG00000153807;;-0	022280035;0	23840676;0	552687545;-0	770252544;0	863536239;10	96465338;4.59632332194815e-14 .;40 x 1; ;
ENSG00000068078;54;ENSG00000068078;FGFR3;-0	863342415;0	313545487;0	440200099;-0	882688605;0	863249276;10	95034628;4.77395900588817e-14 .;40 x 1;4 p16;"fibroblast growth factor receptor 3 [Source:HGNC Symbol;Acc:HGNC:3690]"
ENSG00000121377;364;ENSG00000121377;TAS2R7;0	013495326;0	137316806;0	233911578;-0	457336136;0	86324397;10	95008216;4.78506123613442e-14 .;38 x 6;12 p13;"taste 2 receptor member 7 [Source:HGNC Symbol;Acc:HGNC:14913]"
ENSG00000152804;556;ENSG00000152804;HHEX;-0	835433968;0	118998762;0	162015394;-0	323575346;0	862346615;10	90561314;5.41788836017076e-14 .;36 x 5;10 q23;"hematopoietically expressed homeobox [Source:HGNC Symbol;Acc:HGNC:4901]"
ENSG00000157423;221;ENSG00000157423;HYDIN;-0	727498647;0	138097539;0	293766196;-0	439909005;0	862344813;10	90552424;5.41788836017076e-14 .;40 x 6;16 q22;"HYDIN	axonemal central pair apparatus protein [Source:HGNC Symbol;Acc:HGNC:19368]"
ENSG00000055732;200;ENSG00000055732;MCOLN3;-1	048826841;0	174677125;0	303536374;-0	588286854;0	862250245;10	90086136;5.49560397189452e-14 .;38 x 1;1 p22;"mucolipin 3 [Source:HGNC Symbol;Acc:HGNC:13358]"
ENSG00000164938;163;ENSG00000164938;TP53INP1;-0	970764093;0	195183419;0	324037978;-0	619846872;0	862067514;10	89186409;5.6399329650958e-14 .;40 x 3;8 q22;"tumor protein p53 inducible nuclear protein 1 [Source:HGNC Symbol;Acc:HGNC:18022]"
ENSG00000115155;460;ENSG00000115155;OTOF;-0	137588213;0	110653101;0	201428992;-0	374496981;0	86124044;10	85134688;6.31716901011714e-14 .;36 x 6;2 p23;"otoferlin [Source:HGNC Symbol;Acc:HGNC:8515]"
ENSG00000127129;306;ENSG00000127129;EDN2;0	50214843;0	208664498;0	255992996;-0	631316798;0	860941599;10	83678941;6.58362253602718e-14 .;40 x 3;1 p34;"endothelin 2 [Source:HGNC Symbol;Acc:HGNC:3177]"
ENSG00000175664;35;ENSG00000175664;TEX26;-0	646177478;0	235744479;0	509613754;-0	772487755;0	860924587;10	835962;6.59472476627343e-14 .;40 x 2;13 q12;"testis expressed 26 [Source:HGNC Symbol;Acc:HGNC:28622]"
ENSG00000163520;521;ENSG00000163520;FBLN2;-0	502317236;0	168301464;0	176267803;-0	591008995;0	860647355;10	82249824;6.86117829218347e-14 .;37 x 1;3 p25;"fibulin 2 [Source:HGNC Symbol;Acc:HGNC:3601]"
ENSG00000170703;437;ENSG00000170703;TTLL6;0	683064902;0	130346477;0	209051508;-0	43700038;0	860201623;10	80092904;7.28306304154103e-14 .;37 x 6;17 q21;"tubulin tyrosine ligase like 6 [Source:HGNC Symbol;Acc:HGNC:26664]"
ENSG00000107165;267;ENSG00000107165;TYRP1;0	258166391;0	195272381;0	275601028;-0	580272275;0	85969776;10	7766614;7.80486786311485e-14 .;40 x 4;9 p23;"tyrosinase related protein 1 [Source:HGNC Symbol;Acc:HGNC:12450]"
ENSG00000164867;583;ENSG00000164867;NOS3;0	9759986;0	135536748;0	145124716;-0	458839547;0	859094712;10	74777512;8.47100167788994e-14 .;38 x 5;7 q36;"nitric oxide synthase 3 [Source:HGNC Symbol;Acc:HGNC:7876]"
ENSG00000089250;582;ENSG00000089250;NOS1;-0	256581552;0	141439907;0	146128436;-0	392284488;0	85880894;10	73414627;8.80406858527749e-14 .;35 x 1;12 q24;"nitric oxide synthase 1 [Source:HGNC Symbol;Acc:HGNC:7872]"
ENSG00000124635;205;ENSG00000124635;HIST1H2BJ;-0	748625568;0	127394883;0	300656462;-0	388508896;0	858497095;10	71931757;9.1926466438963e-14 .;36 x 6;6 p22;"histone cluster 1 H2B family member j [Source:HGNC Symbol;Acc:HGNC:4761]"
ENSG00000168309;555;ENSG00000168309;FAM107A;-0	510721031;0	125542452;0	162195351;-0	405695267;0	857868267;10	68955305;9.99200722162641e-14 .;37 x 5;3 p14;"family with sequence similarity 107 member A [Source:HGNC Symbol;Acc:HGNC:30827]"
ENSG00000136250;201;ENSG00000136250;AOAH;-0	070639547;0	2226561;0	30303228;-0	733262326;0	857176247;10	65700761;1.09690034832965e-13 .;39 x 1;7 p14;"acyloxyacyl hydrolase [Source:HGNC Symbol;Acc:HGNC:548]"
ENSG00000085552;324;ENSG00000085552;IGSF9;-0	291695777;0	131775891;0	247728648;-0	493332454;0	856110281;10	60730045;1.26343380202343e-13 .;39 x 6;1 q23;"immunoglobulin superfamily member 9 [Source:HGNC Symbol;Acc:HGNC:18132]"
ENSG00000005059;505;ENSG00000005059;MCUB;-0	451126859;0	211794868;0	185938709;-0	636420199;0	855912234;10	59812143;1.29674049276218e-13 .;40 x 3;4 q25;"mitochondrial calcium uniporter dominant negative beta subunit [Source:HGNC Symbol;Acc:HGNC:26076]"
ENSG00000178695;576;ENSG00000178695;KCTD12;-0	583887529;0	177988161;0	148439332;-0	557507336;0	855333942;10	57141851;1.40110145707695e-13 .;37 x 1;13 q22;"potassium channel tetramerization domain containing 12 [Source:HGNC Symbol;Acc:HGNC:14678]"
ENSG00000126266;573;ENSG00000126266;FFAR1;1	189653648;0	127870527;0	149992986;-0	415583214;0	854083629;10	51418603;1.64979141459298e-13 .;39 x 7;19 q13;"free fatty acid receptor 1 [Source:HGNC Symbol;Acc:HGNC:4498]"
ENSG00000149646;559;ENSG00000149646;CNBD2;0	589411126;0	158007692;0	161442025;-0	538447632;0	853755021;10	49925653;1.72195591119362e-13 .;37 x 1;20 q11;"cyclic nucleotide binding domain containing 2 [Source:HGNC Symbol;Acc:HGNC:16145]"
ENSG00000143851;566;ENSG00000143851;PTPN7;0	534949132;0	126694536;0	15725681;-0	379229518;0	853538644;10	48945126;1.77191594730175e-13 .;35 x 4;1 q32;"protein tyrosine phosphatase	non-receptor type 7 [Source:HGNC Symbol;Acc:HGNC:9659]"
ENSG00000198807;563;ENSG00000198807;PAX9;-0	88166688;0	170549642;0	159070431;-0	538506208;0	853230222;10	47550943;1.84297022087776e-13 .;37 x 1;14 q13;"paired box 9 [Source:HGNC Symbol;Acc:HGNC:8623]"
ENSG00000089876;85;ENSG00000089876;DHX32;-0	14792389;0	206226008;0	389952356;-0	698640678;0	852971655;10	46385242;1.90736315630602e-13 .;40 x 4;10 q26;"DEAH-box helicase 32 (putative) [Source:HGNC Symbol;Acc:HGNC:16717]"
ENSG00000130340;469;ENSG00000130340;SNX9;-1	056538982;0	149431443;0	199074592;-0	534999793;0	852183535;10	42849533;2.11053396981242e-13 .;37 x 4;6 q25;"sorting nexin 9 [Source:HGNC Symbol;Acc:HGNC:14973]"
ENSG00000121904;253;ENSG00000121904;CSMD2;-1	034514847;0	19836366;0	280490347;-0	58623151;0	852057513;10	42286583;2.1449508835758e-13 .;40 x 3;1 p35;"CUB and Sushi multiple domains 2 [Source:HGNC Symbol;Acc:HGNC:19290]"
ENSG00000070748;208;ENSG00000070748;CHAT;-0	84793556;0	205671552;0	299334078;-0	669668494;0	85118451;10	38404872;2.39919195621496e-13 .;40 x 4;10 q11;"choline O-acetyltransferase [Source:HGNC Symbol;Acc:HGNC:1912]"
ENSG00000149300;282;ENSG00000149300;C11orf52;0	045346646;0	125870275;0	268405075;-0	396157264;0	850346919;10	34710028;2.66897615119888e-13 .;38 x 7;11 q23;"chromosome 11 open reading frame 52 [Source:HGNC Symbol;Acc:HGNC:30531]"
ENSG00000069702;549;ENSG00000069702;TGFBR3;-0	364910428;0	12839301;0	165079871;-0	399019621;0	850334185;10	34654076;2.67341704329738e-13 .;39 x 6;1 p22;"transforming growth factor beta receptor 3 [Source:HGNC Symbol;Acc:HGNC:11774]"
ENSG00000148204;159;ENSG00000148204;CRB2;-0	044985;0	196201778;0	327444406;-0	725964693;0	849841871;10	32495879;2.8466118351389e-13 .;40 x 3;9 q33;"crumbs 2	cell polarity complex component [Source:HGNC Symbol;Acc:HGNC:18688]"
ENSG00000115318;537;ENSG00000115318;LOXL3;-0	75530159;0	116194237;0	170570593;-0	452086713;0	848328364;10	25921582;3.44391182238724e-13 .;39 x 7;2 p13;"lysyl oxidase like 3 [Source:HGNC Symbol;Acc:HGNC:13869]"
ENSG00000142765;4;ENSG00000142765;SYTL1;-0	02709891;0	285471117;0	775333824;-0	801100337;0	847732528;10	23358157;3.70925512527265e-13 .;40 x 1;1 p36;"synaptotagmin like 1 [Source:HGNC Symbol;Acc:HGNC:15584]"
ENSG00000188064;330;ENSG00000188064;WNT7B;-0	860858938;0	212186565;0	245315579;-0	54137483;0	847541543;10	22539412;3.79918319026729e-13 .;38 x 1;22 q13;"Wnt family member 7B [Source:HGNC Symbol;Acc:HGNC:12787]"
ENSG00000168000;577;ENSG00000168000;BSCL2;-0	640144884;0	162221711;0	148086046;-0	590788227;0	8471306;10	20782498;3.99680288865056e-13 .;40 x 5;11 q12;"BSCL2	seipin lipid droplet biogenesis associated [Source:HGNC Symbol;Acc:HGNC:15832]"
ENSG00000162188;578;ENSG00000162188;GNG3;-0	640490247;0	162166193;0	148008536;-0	590578276;0	847127676;10	20770022;3.99902333469981e-13 .;40 x 5;11 q12;"G protein subunit gamma 3 [Source:HGNC Symbol;Acc:HGNC:4405]"
ENSG00000111981;88;ENSG00000111981;ULBP1;-0	952896097;0	241900848;0	387109937;-0	635538429;0	847024055;10	20328048;4.05009359383257e-13 .;39 x 1;6 q25;"UL16 binding protein 1 [Source:HGNC Symbol;Acc:HGNC:14893]"
ENSG00000175206;250;ENSG00000175206;NPPA;-0	060090672;0	175084754;0	281552304;-0	587382235;0	846778288;10	1928142;4.17665901863984e-13 .;37 x 1;1 p36;"natriuretic peptide A [Source:HGNC Symbol;Acc:HGNC:7939]"
ENSG00000066382;570;ENSG00000066382;MPPED2;0	608425051;0	131249661;0	153892782;-0	518100276;0	846490948;10	18060672;4.32764934998886e-13 .;36 x 5;11 p14;"metallophosphoesterase domain containing 2 [Source:HGNC Symbol;Acc:HGNC:1180]"
ENSG00000171017;304;ENSG00000171017;LRRC8E;-0	271259886;0	205004347;0	256927066;-0	503875866;0	845411446;10	13502394;4.9427129056312e-13 .;40 x 2;19 p13;"leucine rich repeat containing 8 family member E [Source:HGNC Symbol;Acc:HGNC:26272]"
ENSG00000130201;436;ENSG00000130201;;0	050566896;0	194272338;0	209087935;-0	6700171;0	844825525;10	11046579;5.3090865037575e-13 .;40 x 4; ;
ENSG00000128709;433;ENSG00000128709;HOXD9;-1	126368466;0	146176973;0	209952168;-0	468001722;0	844480052;10	09604531;5.53779244683028e-13 .;40 x 5;2 q31;"homeobox D9 [Source:HGNC Symbol;Acc:HGNC:5140]"
ENSG00000185332;189;ENSG00000185332;TMEM105;0	906451528;0	144362391;0	309824868;-0	502740555;0	844357092;10	09092343;5.62105917367717e-13 .;39 x 6;17 q25;"transmembrane protein 105 [Source:HGNC Symbol;Acc:HGNC:26794]"
ENSG00000164695;274;ENSG00000164695;CHMP4C;-1	028618877;0	165942255;0	272195228;-0	495039521;0	844338627;10	09015473;5.63327162694804e-13 .;37 x 2;8 q21;"charged multivesicular body protein 4C [Source:HGNC Symbol;Acc:HGNC:30599]"
ENSG00000187714;539;ENSG00000187714;SLC18A3;-1	071638131;0	144082625;0	170096919;-0	488528685;0	844191878;10	08405021;5.73541214521356e-13 .;39 x 6;10 q11;"solute carrier family 18 member A3 [Source:HGNC Symbol;Acc:HGNC:10936]"
ENSG00000136931;372;ENSG00000136931;NR5A1;1	098459854;0	159253492;0	232235164;-0	531922264;0	844117234;10	08094816;5.78759262737094e-13 .;39 x 5;9 q33;"nuclear receptor subfamily 5 group A member 1 [Source:HGNC Symbol;Acc:HGNC:7983]"
ENSG00000133466;96;ENSG00000133466;C1QTNF6;0	312749108;0	126219937;0	37208186;-0	390487328;0	843962628;10	07452949;5.89750470680883e-13 .;36 x 6;22 q12;"C1q and TNF related 6 [Source:HGNC Symbol;Acc:HGNC:14343]"
ENSG00000042286;87;ENSG00000042286;AIFM2;-0	691937909;0	283649371;0	3878997;-0	78759357;0	842728643;10	02361027;6.84563516983872e-13 .;39 x 1;10 q22;"apoptosis inducing factor	mitochondria associated 2 [Source:HGNC Symbol;Acc:HGNC:21411]"
ENSG00000174226;305;ENSG00000174226;SNX31;-0	222096864;0	160068175;0	256143975;-0	512800809;0	842668925;10	02116;6.89448498292222e-13 .;40 x 6;8 q22;"sorting nexin 31 [Source:HGNC Symbol;Acc:HGNC:28605]"
ENSG00000157193;99;ENSG00000157193;LRP8;0	295646841;0	277429178;0	369750756;-0	780994067;0	841452643;9	971530624;7.97584220890712e-13 .;39 x 1;1 p32;"LDL receptor related protein 8 [Source:HGNC Symbol;Acc:HGNC:6700]"
ENSG00000133116;477;ENSG00000133116;KL;-0	276050786;0	166440194;0	196760147;-0	595603933;0	84093256;9	9504681;8.4865448002347e-13 .;40 x 5;13 q13;"klotho [Source:HGNC Symbol;Acc:HGNC:6344]"
ENSG00000158715;295;ENSG00000158715;SLC45A3;-0	945580806;0	186166225;0	261399995;-0	604451441;0	839778342;9	904059399;9.72888436479025e-13 .;40 x 5;1 q32;"solute carrier family 45 member 3 [Source:HGNC Symbol;Acc:HGNC:8642]"
ENSG00000099834;302;ENSG00000099834;CDHR5;1	182121574;0	189747246;0	257996023;-0	515307846;0	839459862;9	891334535;1.01008090780397e-12 .;39 x 2;11 p15;"cadherin related family member 5 [Source:HGNC Symbol;Acc:HGNC:7521]"
ENSG00000152503;512;ENSG00000152503;TRIM36;-0	691457494;0	118478163;0	182947993;-0	436259038;0	83862065;9	857968651;1.11455289442119e-12 .;36 x 5;5 q22;"tripartite motif containing 36 [Source:HGNC Symbol;Acc:HGNC:16280]"
ENSG00000158555;406;ENSG00000158555;GDPD5;-0	483021106;0	19589359;0	222458464;-0	706032834;0	838620153;9	857948977;1.11466391672366e-12 .;37 x 1;11 q13;"glycerophosphodiester phosphodiesterase domain containing 5 [Source:HGNC Symbol;Acc:HGNC:28804]"
ENSG00000170289;331;ENSG00000170289;CNGB3;0	57485886;0	214694854;0	24482076;-0	718986048;0	837969998;9	832262615;1.20259358027397e-12 .;39 x 1;8 q21;"cyclic nucleotide gated channel beta 3 [Source:HGNC Symbol;Acc:HGNC:2153]"
ENSG00000125551;122;ENSG00000125551;PLGLB2;0	194623654;0	16021159;0	3567261;-0	535575001;0	837201794;9	802093501;1.31472610576111e-12 .;40 x 6;2 p11;"plasminogen-like B2 [Source:HGNC Symbol;Acc:HGNC:9073]"
ENSG00000160161;180;ENSG00000160161;CILP2;-0	254633563;0	138081687;0	313401263;-0	401187864;0	835901107;9	751453674;1.52766688188422e-12 .;36 x 5;19 p13;"cartilage intermediate layer protein 2 [Source:HGNC Symbol;Acc:HGNC:24213]"
ENSG00000127377;527;ENSG00000127377;CRYGN;-0	562328551;0	137549096;0	172574386;-0	447386044;0	835634881;9	741156202;1.57507340503571e-12 .;40 x 7;7 q36;"crystallin gamma N [Source:HGNC Symbol;Acc:HGNC:20458]"
ENSG00000159556;62;ENSG00000159556;ISL2;-0	858600627;0	195101675;0	422096893;-0	608507706;0	835226132;9	725390355;1.65056857071022e-12 .;40 x 3;15 q24;"ISL LIM homeobox 2 [Source:HGNC Symbol;Acc:HGNC:18524]"
ENSG00000172164;567;ENSG00000172164;SNTB1;0	537938642;0	138564034;0	156887019;-0	439087674;0	835198268;9	724317565;1.65578661892596e-12 .;39 x 6;8 q24;"syntrophin beta 1 [Source:HGNC Symbol;Acc:HGNC:11168]"
ENSG00000151033;579;ENSG00000151033;LYZL2;0	56720826;0	124345599;0	147466197;-0	426848957;0	834705013;9	705367503;1.75170988825357e-12 .;39 x 7;10 p11;"lysozyme like 2 [Source:HGNC Symbol;Acc:HGNC:29613]"
ENSG00000172346;124;ENSG00000172346;CSDC2;-0	463822896;0	228920401;0	354238157;-0	774367322;0	834309376;9	690223463;1.83242310214382e-12 .;38 x 1;22 q13;"cold shock domain containing C2 [Source:HGNC Symbol;Acc:HGNC:30359]"
ENSG00000131183;560;ENSG00000131183;SLC34A1;0	685029246;0	141784925;0	161088975;-0	457177181;0	834050001;9	680321983;1.88715709725784e-12 .;37 x 4;5 q35;"solute carrier family 34 member 1 [Source:HGNC Symbol;Acc:HGNC:11019]"
ENSG00000112562;381;ENSG00000112562;SMOC2;-0	867013317;0	150449596;0	230437956;-0	449234987;0	833959211;9	67686111;1.90669702249124e-12 .;38 x 5;6 q27;"SPARC related modular calcium binding 2 [Source:HGNC Symbol;Acc:HGNC:20323]"
ENSG00000133106;319;ENSG00000133106;EPSTI1;-1	05233925;0	182048172;0	249951929;-0	513046317;0	833942751;9	676233932;1.91024973617004e-12 .;40 x 5;13 q14;"epithelial stromal interaction 1 [Source:HGNC Symbol;Acc:HGNC:16465]"
ENSG00000119737;376;ENSG00000119737;GPR75;-0	361818501;0	197503619;0	230863467;-0	736810488;0	833569188;9	662022927;1.99285032920216e-12 .;40 x 5;2 p16;"G protein-coupled receptor 75 [Source:HGNC Symbol;Acc:HGNC:4526]"
ENSG00000153563;552;ENSG00000153563;CD8A;-0	796320383;0	151144614;0	164591484;-0	527547984;0	831818249;9	595989104;2.42672548722567e-12 .;37 x 4;2 p11;"CD8a molecule [Source:HGNC Symbol;Acc:HGNC:1706]"
ENSG00000204262;395;ENSG00000204262;COL5A2;-0	740967298;0	131117639;0	225269511;-0	455943597;0	83176231;9	593894927;2.44182452036057e-12 .;38 x 6;2 q32;"collagen type V alpha 2 chain [Source:HGNC Symbol;Acc:HGNC:2210]"
ENSG00000130635;442;ENSG00000130635;COL5A1;-1	007518238;0	199098114;0	205130918;-0	535162058;0	831653683;9	589830951;2.47168951972299e-12 .;37 x 1;9 q34;"collagen type V alpha 1 chain [Source:HGNC Symbol;Acc:HGNC:2209]"
ENSG00000184157;508;ENSG00000184157;;0	302446529;0	1912411;0	184567762;-0	516136134;0	831514712;9	584636954;2.51032528097994e-12 .;39 x 3; ;
ENSG00000013306;461;ENSG00000013306;SLC25A39;-0	889770703;0	181231303;0	201097019;-0	569314016;0	83127826;9	575813028;2.57749377396976e-12 .;36 x 1;17 q21;"solute carrier family 25 member 39 [Source:HGNC Symbol;Acc:HGNC:24279]"
ENSG00000158486;333;ENSG00000158486;DNAH3;-0	360490461;0	136830439;0	243829804;-0	441566346;0	830279751;9	538735519;2.87969648127273e-12 .;40 x 6;16 p12;"dynein axonemal heavy chain 3 [Source:HGNC Symbol;Acc:HGNC:2949]"
ENSG00000111305;453;ENSG00000111305;GSG1;0	782712112;0	172855621;0	203129956;-0	503294155;0	830204064;9	535937133;2.90389934320956e-12 .;36 x 1;12 p13;"germ cell associated 1 [Source:HGNC Symbol;Acc:HGNC:19716]"
ENSG00000102802;193;ENSG00000102802;MEDAG;-0	865093196;0	222204796;0	308018526;-0	609617343;0	82993452;9	525985115;2.99182900675987e-12 .;40 x 1;13 q12;"mesenteric estrogen dependent adipogenesis [Source:HGNC Symbol;Acc:HGNC:25926]"
ENSG00000136574;443;ENSG00000136574;GATA4;-0	986300625;0	170984174;0	20511109;-0	475086268;0	829750943;9	519219386;3.05311331771918e-12 .;35 x 1;8 p23;"GATA binding protein 4 [Source:HGNC Symbol;Acc:HGNC:4173]"
ENSG00000052344;91;ENSG00000052344;PRSS8;0	131998224;0	206005685;0	379743863;-0	672863373;0	829601455;9	513717319;3.10373948764209e-12 .;40 x 5;16 p11;"protease	serine 8 [Source:HGNC Symbol;Acc:HGNC:9491]"
ENSG00000117245;129;ENSG00000117245;KIF17;-0	876586971;0	156631445;0	350551329;-0	427239206;0	829012381;9	492099681;3.31157323785192e-12 .;38 x 5;1 p36;"kinesin family member 17 [Source:HGNC Symbol;Acc:HGNC:19167]"
ENSG00000188508;535;ENSG00000188508;KRTDAP;0	561814213;0	146781851;0	170805316;-0	424289376;0	82889949;9	487968379;3.35287353436797e-12 .;40 x 6;19 q13;"keratinocyte differentiation associated protein [Source:HGNC Symbol;Acc:HGNC:16313]"
ENSG00000125458;310;ENSG00000125458;NT5C;-1	033851072;0	235856869;0	255154471;-0	815032398;0	828737677;9	482053252;3.41293660000019e-12 .;40 x 1;17 q25;"5'	3'-nucleotidase	cytosolic [Source:HGNC Symbol;Acc:HGNC:17144]"
ENSG00000163975;114;ENSG00000163975;MELTF;-0	943380989;0	259731952;0	360341084;-0	889413952;0	827676505;9	443449094;3.83248988100604e-12 .;40 x 2;3 q29;"melanotransferrin [Source:HGNC Symbol;Acc:HGNC:7037]"
ENSG00000160991;139;ENSG00000160991;ORAI2;-1	052849159;0	193310107;0	344971546;-0	605680293;0	826286065;9	393352611;4.45588010933307e-12 .;37 x 1;7 q22;"ORAI calcium release-activated calcium modulator 2 [Source:HGNC Symbol;Acc:HGNC:21667]"
ENSG00000171634;480;ENSG00000171634;BPTF;-1	042576939;0	11575529;0	196329183;-0	322671657;0	825580797;9	368149923;4.80748774123185e-12 .;36 x 6;17 q24;"bromodomain PHD finger transcription factor [Source:HGNC Symbol;Acc:HGNC:3581]"
ENSG00000117122;569;ENSG00000117122;MFAP2;0	914039081;0	15365344;0	154434509;-0	55462721;0	824712302;9	337303641;5.27622390222859e-12 .;39 x 5;1 p36;"microfibril associated protein 2 [Source:HGNC Symbol;Acc:HGNC:7033]"
ENSG00000139155;220;ENSG00000139155;SLCO1C1;-0	411943534;0	195910056;0	293870057;-0	698886268;0	824445135;9	327856342;5.42899059041702e-12 .;40 x 5;12 p12;"solute carrier organic anion transporter family member 1C1 [Source:HGNC Symbol;Acc:HGNC:13819]"
ENSG00000150054;98;ENSG00000150054;MPP7;0	490545989;0	166247362;0	370918233;-0	476295137;0	82409054;9	31534756;5.63793456365147e-12 .;38 x 4;10 p12;"membrane palmitoylated protein 7 [Source:HGNC Symbol;Acc:HGNC:26542]"
ENSG00000074590;329;ENSG00000074590;NUAK1;-0	919608689;0	158329581;0	245692105;-0	568779154;0	823794889;9	304944229;5.81801273824567e-12 .;36 x 3;12 q23;"NUAK family kinase 1 [Source:HGNC Symbol;Acc:HGNC:14311]"
ENSG00000157554;532;ENSG00000157554;ERG;-0	633579665;0	133556234;0	171114556;-0	529140857;0	82328721;9	287135064;6.1398663930845e-12 .;40 x 7;21 q22;"ERG	ETS transcription factor [Source:HGNC Symbol;Acc:HGNC:3446]"
ENSG00000126231;471;ENSG00000126231;PROZ;0	549015786;0	139832609;0	198292628;-0	430602791;0	823132556;9	281723648;6.24122975523278e-12 .;39 x 6;13 q34;"protein Z	vitamin K dependent plasma glycoprotein [Source:HGNC Symbol;Acc:HGNC:9460]"
ENSG00000163874;402;ENSG00000163874;ZC3H12A;-0	960708646;0	11779527;0	22438554;-0	39367136;0	82293846;9	274941226;6.37068175990407e-12 .;39 x 7;1 p34;"zinc finger CCCH-type containing 12A [Source:HGNC Symbol;Acc:HGNC:26259]"
ENSG00000179348;24;ENSG00000179348;GATA2;-1	043503915;0	326739168;0	566807264;-0	808387918;0	821530823;9	226052419;7.38753502815825e-12 .;40 x 1;3 q21;"GATA binding protein 2 [Source:HGNC Symbol;Acc:HGNC:4171]"
ENSG00000158104;558;ENSG00000158104;HPD;0	807588659;0	149169995;0	161564027;-0	587024254;0	82149857;9	224938364;7.41251504621232e-12 .;40 x 6;12 q24;"4-hydroxyphenylpyruvate dioxygenase [Source:HGNC Symbol;Acc:HGNC:5147]"
ENSG00000120820;484;ENSG00000120820;GLT8D2;-0	516931222;0	186493955;0	194825339;-0	732332162;0	821106507;9	21141773;7.72282238159505e-12 .;40 x 5;12 q23;"glycosyltransferase 8 domain containing 2 [Source:HGNC Symbol;Acc:HGNC:24890]"
ENSG00000148702;123;ENSG00000148702;HABP2;0	402229205;0	136744459;0	3562693;-0	43760785;0	821055941;9	209676817;7.76378961120372e-12 .;37 x 6;10 q25;"hyaluronan binding protein 2 [Source:HGNC Symbol;Acc:HGNC:4798]"
ENSG00000104879;148;ENSG00000104879;CKM;0	329455692;0	177525005;0	334772017;-0	582361483;0	820507103;9	190824041;8.22097945274436e-12 .;40 x 4;19 q13;"creatine kinase	M-type [Source:HGNC Symbol;Acc:HGNC:1994]"
ENSG00000185436;270;ENSG00000185436;IFNLR1;-0	337992663;0	136878039;0	273887325;-0	377449289;0	820503629;9	190704933;8.22386603260838e-12 .;36 x 3;1 p36;"interferon lambda receptor 1 [Source:HGNC Symbol;Acc:HGNC:18584]"
ENSG00000198951;506;ENSG00000198951;NAGA;-0	958273622;0	169244271;0	185425564;-0	490358238;0	820273082;9	182809011;8.42348413243599e-12 .;36 x 1;22 q13;"alpha-N-acetylgalactosaminidase [Source:HGNC Symbol;Acc:HGNC:7631]"
ENSG00000186522;308;ENSG00000186522;Sep 10;-0	010596424;0	168042534;0	255582722;-0	453307162;0	820048182;9	175119664;8.62265814305374e-12 .;36 x 1;2 q13;"septin 10 [Source:HGNC Symbol;Acc:HGNC:14349]"
ENSG00000044115;121;ENSG00000044115;CTNNA1;0	2243218;0	212254784;0	357004794;-0	646116998;0	819087936;9	142434281;9.52349310523459e-12 .;40 x 3;5 q31;"catenin alpha 1 [Source:HGNC Symbol;Acc:HGNC:2509]"
ENSG00000072682;373;ENSG00000072682;P4HA2;-0	51305062;0	169934567;0	231542317;-0	496137692;0	818051391;9	107413777;1.05950803686028e-11 .;36 x 1;5 q31;"prolyl 4-hydroxylase subunit alpha 2 [Source:HGNC Symbol;Acc:HGNC:8547]"
ENSG00000176842;287;ENSG00000176842;IRX5;-1	221796927;0	201550365;0	264890913;-0	544579767;0	817768895;9	097916116;1.09061648601028e-11 .;38 x 1;16 q12;"iroquois homeobox 5 [Source:HGNC Symbol;Acc:HGNC:14361]"
ENSG00000167791;109;ENSG00000167791;CABP2;0	195856612;0	163472152;0	363136611;-0	460697619;0	817174041;9	077981598;1.1589618154062e-11 .;40 x 5;11 q13;"calcium binding protein 2 [Source:HGNC Symbol;Acc:HGNC:1385]"
ENSG00000169413;571;ENSG00000169413;RNASE6;0	309792574;0	12795706;0	152854084;-0	349228879;0	816850756;9	067184456;1.19776411011685e-11 .;35 x 3;14 q11;"ribonuclease A family member k6 [Source:HGNC Symbol;Acc:HGNC:10048]"
ENSG00000145020;138;ENSG00000145020;AMT;-0	204331071;0	144298715;0	345363748;-0	435839403;0	816518799;9	05612443;1.23888677094897e-11 .;40 x 6;3 p21;"aminomethyltransferase [Source:HGNC Symbol;Acc:HGNC:473]"
ENSG00000172568;51;ENSG00000172568;FNDC9;0	22957017;0	247020417;0	447019713;-0	870877972;0	816490745;9	055190975;1.24242838239752e-11 .;40 x 1;5 q33;"fibronectin type III domain containing 9 [Source:HGNC Symbol;Acc:HGNC:33547]"
ENSG00000140506;383;ENSG00000140506;LMAN1L;0	805116084;0	12928218;0	229418316;-0	414674115;0	816458311;9	054112017;1.24652510535839e-11 .;39 x 7;15 q24;"lectin	mannose binding 1 like [Source:HGNC Symbol;Acc:HGNC:6632]"
ENSG00000106333;407;ENSG00000106333;PCOLCE;0	421840834;0	138308646;0	221340733;-0	514723052;0	816338807;9	050138783;1.26173516079575e-11 .;37 x 6;7 q22;"procollagen C-endopeptidase enhancer [Source:HGNC Symbol;Acc:HGNC:8738]"
ENSG00000105227;423;ENSG00000105227;PRX;-0	246420379;0	160127682;0	214571427;-0	509725057;0	815743195;9	03038794;1.34020572417626e-11 .;39 x 5;19 q13;"periaxin [Source:HGNC Symbol;Acc:HGNC:13797]"
ENSG00000149735;13;ENSG00000149735;GPHA2;0	300331022;0	226969366;0	649395563;-0	68271108;0	815690802;9	028654664;1.3473222537641e-11 .;40 x 1;11 q13;"glycoprotein hormone alpha 2 [Source:HGNC Symbol;Acc:HGNC:18054]"
ENSG00000154856;237;ENSG00000154856;APCDD1;-0	394377817;0	180479242;0	287827662;-0	685878005;0	815521542;9	023059731;1.37055922166951e-11 .;40 x 5;18 p11;"APC down-regulated 1 [Source:HGNC Symbol;Acc:HGNC:15718]"
ENSG00000110799;58;ENSG00000110799;VWF;0	411987062;0	208539416;0	430505773;-0	624542339;0	815416605;9	019594487;1.38515865444333e-11 .;38 x 1;12 p13;"von Willebrand factor [Source:HGNC Symbol;Acc:HGNC:12726]"
ENSG00000100276;351;ENSG00000100276;RASL10A;-0	019516986;0	122424739;0	237587283;-0	370537172;0	815334969;9	016900545;1.39661615605746e-11 .;36 x 6;22 q12;"RAS like family 10 member A [Source:HGNC Symbol;Acc:HGNC:16954]"
ENSG00000125966;348;ENSG00000125966;MMP24;-0	410720016;0	152031321;0	238470386;-0	448313487;0	814731255;8	997027865;1.48413503708866e-11 .;36 x 1;20 q11;"matrix metallopeptidase 24 [Source:HGNC Symbol;Acc:HGNC:7172]"
ENSG00000163909;356;ENSG00000163909;HEYL;-0	241129142;0	244337268;0	236781427;-0	704600329;0	814674186;8	995153816;1.49267265214803e-11 .;40 x 1;1 p34;"hes related family bHLH transcription factor with YRPW motif-like [Source:HGNC Symbol;Acc:HGNC:4882]"
ENSG00000204618;269;ENSG00000204618;RNF39;-0	805335113;0	208955539;0	274594688;-0	631479234;0	814298668;8	982841828;1.54998236467918e-11 .;40 x 5;6 p22;"ring finger protein 39 [Source:HGNC Symbol;Acc:HGNC:18064]"
ENSG00000168079;284;ENSG00000168079;SCARA5;-0	448912245;0	162477766;0	266025414;-0	380154256;0	813443425;8	954925889;1.68836056246846e-11 .;39 x 5;8 p21;"scavenger receptor class A member 5 [Source:HGNC Symbol;Acc:HGNC:28701]"
ENSG00000187210;218;ENSG00000187210;GCNT1;-1	206343569;0	162405619;0	29501427;-0	436574691;0	812703408;8	930909654;1.8173906823904e-11 .;35 x 1;9 q21;"glucosaminyl (N-acetyl) transferase 1	core 2 [Source:HGNC Symbol;Acc:HGNC:4203]"
ENSG00000132130;390;ENSG00000132130;;-1	404602446;0	152702852;0	22609701;-0	377455744;0	812644053;8	928988898;1.82812653903852e-11 .;35 x 1; ;
ENSG00000100320;209;ENSG00000100320;RBFOX2;-0	616345768;0	165940935;0	298805229;-0	57710058;0	81222832;8	915558494;1.90504279018455e-11 .;37 x 3;22 q12;"RNA binding protein	fox-1 homolog 2 [Source:HGNC Symbol;Acc:HGNC:9906]"
ENSG00000140511;448;ENSG00000140511;HAPLN3;-1	388914198;0	130645862;0	203853001;-0	409306706;0	811709202;8	898844233;2.00536254268968e-11 .;36 x 5;15 q26;"hyaluronan and proteoglycan link protein 3 [Source:HGNC Symbol;Acc:HGNC:21446]"
ENSG00000137868;451;ENSG00000137868;STRA6;0	277031149;0	145577351;0	203547026;-0	489290132;0	811630893;8	896328268;2.02091676726468e-11 .;37 x 5;15 q24;"stimulated by retinoic acid 6 [Source:HGNC Symbol;Acc:HGNC:30650]"
ENSG00000188523;72;ENSG00000188523;CFAP77;0	053388416;0	176197872;0	406485454;-0	556649228;0	810640724;8	864636104;2.22768470337087e-11 .;40 x 5;9 q34;"cilia and flagella associated protein 77 [Source:HGNC Symbol;Acc:HGNC:33776]"
ENSG00000213145;294;ENSG00000213145;CRIP1;-0	894109331;0	193382749;0	262380432;-0	526753956;0	810121025;8	848091126;2.34400276966085e-11 .;37 x 1;14 q32;"cysteine rich protein 1 [Source:HGNC Symbol;Acc:HGNC:2360]"
ENSG00000149564;543;ENSG00000149564;ESAM;-0	935604852;0	128046183;0	168106789;-0	37457304;0	80946558;8	827311046;2.49885667713556e-11 .;40 x 7;11 q24;"endothelial cell adhesion molecule [Source:HGNC Symbol;Acc:HGNC:17474]"
ENSG00000182218;534;ENSG00000182218;HHIPL1;-0	657462692;0	147325432;0	170884879;-0	51797632;0	809139398;8	817005597;2.5794477664931e-11 .;35 x 3;14 q32;"HHIP like 1 [Source:HGNC Symbol;Acc:HGNC:19710]"
ENSG00000184497;265;ENSG00000184497;TMEM255B;-1	20911546;0	171826682;0	276895046;-0	516074706;0	809058357;8	81444883;2.59985366568571e-11 .;40 x 5;13 q34;"transmembrane protein 255B [Source:HGNC Symbol;Acc:HGNC:28297]"
ENSG00000183092;422;ENSG00000183092;BEGAIN;0	138773849;0	13680978;0	215420922;-0	481799224;0	807851247;8	776537177;2.92225132980661e-11 .;40 x 7;14 q32;"brain enriched guanylate kinase associated [Source:HGNC Symbol;Acc:HGNC:24163]"
ENSG00000159217;303;ENSG00000159217;IGF2BP1;-1	185343732;0	137480789;0	257521003;-0	394961682;0	806714786;8	741135054;3.25980353821365e-11 .;36 x 4;17 q21;"insulin like growth factor 2 mRNA binding protein 1 [Source:HGNC Symbol;Acc:HGNC:28866]"
ENSG00000005513;359;ENSG00000005513;SOX8;-0	766693363;0	193266692;0	235952939;-0	721483379;0	805456306;8	702255794;3.67620378582956e-11 .;40 x 3;16 p13;"SRY-box 8 [Source:HGNC Symbol;Acc:HGNC:11203]"
ENSG00000173838;177;ENSG00000173838;MARCH10;-0	580852376;0	144531213;0	314213334;-0	482573994;0	805451402;8	702104948;3.67792463151773e-11 .;36 x 3;17 q23;"membrane associated ring-CH-type finger 10 [Source:HGNC Symbol;Acc:HGNC:26655]"
ENSG00000135925;363;ENSG00000135925;WNT10A;-0	687186939;0	131819361;0	234029828;-0	447460821;0	80529134;8	697184313;3.73434616562918e-11 .;40 x 7;2 q35;"Wnt family member 10A [Source:HGNC Symbol;Acc:HGNC:13829]"
ENSG00000106236;115;ENSG00000106236;NPTX2;-0	993391889;0	186264007;0	360278207;-0	518760859;0	805112929;8	691705979;3.79820619400562e-11 .;37 x 1;7 q22;"neuronal pentraxin 2 [Source:HGNC Symbol;Acc:HGNC:7953]"
ENSG00000146215;135;ENSG00000146215;CRIP3;-0	850022039;0	224393;0	346391456;-0	613366463;0	804106224;8	660919076;4.17821333087431e-11 .;37 x 1;6 p21;"cysteine rich protein 3 [Source:HGNC Symbol;Acc:HGNC:17751]"
ENSG00000219222;136;ENSG00000219222;;-0	85031456;0	224305037;0	346374801;-0	61313397;0	804098465;8	66068263;4.18127754642228e-11 .;37 x 1;6 p21;"ribosomal protein L12 pseudogene 47 [Source:HGNC Symbol;Acc:HGNC:51939]"
ENSG00000101204;475;ENSG00000101204;CHRNA4;-0	232152567;0	139174933;0	197056068;-0	394085795;0	803974834;8	656916538;4.23036050634096e-11 .;35 x 3;20 q13;"cholinergic receptor nicotinic alpha 4 subunit [Source:HGNC Symbol;Acc:HGNC:1958]"
ENSG00000160808;522;ENSG00000160808;MYL3;0	986942438;0	118236893;0	175227239;-0	431557887;0	803847792;8	653049872;4.28136415209224e-11 .;39 x 7;3 p21;"myosin light chain 3 [Source:HGNC Symbol;Acc:HGNC:7584]"
ENSG00000165863;542;ENSG00000165863;C10orf82;-0	404210698;0	150056451;0	168814508;-0	472855566;0	802687739;8	617896393;4.77460293524246e-11 .;35 x 1;10 q25;"chromosome 10 open reading frame 82 [Source:HGNC Symbol;Acc:HGNC:28500]"
ENSG00000135775;415;ENSG00000135775;COG2;-0	807199292;0	210210978;0	217513222;-0	574782352;0	802158925;8	601963052;5.01673147468296e-11 .;36 x 1;1 q42;"component of oligomeric golgi complex 2 [Source:HGNC Symbol;Acc:HGNC:6546]"
ENSG00000165807;61;ENSG00000165807;PPP1R36;-0	806517;0	176006504;0	42562207;-0	490418845;0	801327968;8	577040617;5.42063061104159e-11 .;37 x 3;14 q23;"protein phosphatase 1 regulatory subunit 36 [Source:HGNC Symbol;Acc:HGNC:20097]"
ENSG00000142583;266;ENSG00000142583;SLC2A5;-0	524901223;0	164762965;0	275963412;-0	582750679;0	800287147;8	546019354;5.96966920340947e-11 .;40 x 6;1 p36;"solute carrier family 2 member 5 [Source:HGNC Symbol;Acc:HGNC:11010]"
ENSG00000198754;46;ENSG00000198754;OXCT2;0	220091124;0	198211683;0	458536581;-0	575264257;0	79994056;8	535737293;6.16380280149542e-11 .;37 x 1;1 p34;"3-oxoacid CoA-transferase 2 [Source:HGNC Symbol;Acc:HGNC:18606]"
ENSG00000178038;17;ENSG00000178038;ALS2CL;-1	052984871;0	397634273;0	602909901;-1	061838923;0	799635894;8	526718458;6.33932906168866e-11 .;40 x 1;3 p21;"ALS2 C-terminal like [Source:HGNC Symbol;Acc:HGNC:20605]"
ENSG00000116661;21;ENSG00000116661;FBXO2;-0	131120979;0	262002113;0	577410861;-0	827333379;0	799508744;8	522959953;6.41395825340396e-11 .;39 x 1;1 p36;"F-box protein 2 [Source:HGNC Symbol;Acc:HGNC:13581]"
ENSG00000105664;375;ENSG00000105664;COMP;-0	887471706;0	194329317;0	230944932;-0	625930068;0	798890307;8	504724275;6.78890277328037e-11 .;37 x 1;19 p13;"cartilage oligomeric matrix protein [Source:HGNC Symbol;Acc:HGNC:2227]"
ENSG00000110786;347;ENSG00000110786;PTPN5;-0	061439947;0	148317942;0	239682255;-0	402463639;0	798029494;8	47946571;7.34514671307807e-11 .;36 x 3;11 p15;"protein tyrosine phosphatase	non-receptor type 5 [Source:HGNC Symbol;Acc:HGNC:9657]"
ENSG00000125046;493;ENSG00000125046;SSUH2;0	651793382;0	122044103;0	190699453;-0	395404783;0	797348538;8	459585981;7.81519293724386e-11 .;37 x 6;3 p25;"ssu-2 homolog (C. elegans) [Source:HGNC Symbol;Acc:HGNC:24809]"
ENSG00000138100;278;ENSG00000138100;TRIM54;0	196713501;0	151501948;0	27109296;-0	558598908;0	797304507;8	458303595;7.84654563545928e-11 .;40 x 6;2 p23;"tripartite motif containing 54 [Source:HGNC Symbol;Acc:HGNC:16008]"
ENSG00000173627;438;ENSG00000173627;APOBEC4;0	016528642;0	145048655;0	209007745;-0	500937391;0	796464095;8	433897983;8.46794856457223e-11 .;35 x 2;1 q25;"apolipoprotein B mRNA editing enzyme catalytic polypeptide like 4 [Source:HGNC Symbol;Acc:HGNC:32152]"
ENSG00000169436;166;ENSG00000169436;COL22A1;-1	113395814;0	168279476;0	32272785;-0	44519691;0	796079454;8	422772663;8.76749783884634e-11 .;39 x 5;8 q24;"collagen type XXII alpha 1 chain [Source:HGNC Symbol;Acc:HGNC:22989]"
ENSG00000197165;70;ENSG00000197165;SULT1A2;0	063101235;0	143487689;0	409426588;-0	380966344;0	79604984;8	421917275;8.79097905581716e-11 .;36 x 4;16 p11;"sulfotransferase family 1A member 2 [Source:HGNC Symbol;Acc:HGNC:11454]"
ENSG00000115107;81;ENSG00000115107;STEAP3;-0	669337381;0	209041792;0	395592795;-0	767335983;0	79476376;8	384927538;9.86911663503065e-11 .;40 x 5;2 q14;"STEAP3 metalloreductase [Source:HGNC Symbol;Acc:HGNC:24592]"
ENSG00000112039;299;ENSG00000112039;FANCE;-1	039391962;0	173962013;0	258514766;-0	391196935;0	794695456;8	382971602;9.92971260771469e-11 .;39 x 4;6 p21;"Fanconi anemia complementation group E [Source:HGNC Symbol;Acc:HGNC:3586]"
ENSG00000160190;369;ENSG00000160190;SLC37A1;0	592672348;0	119203902;0	232652861;-0	360891008;0	794660082;8	381959018;9.9612318393838e-11 .;36 x 6;21 q22;"solute carrier family 37 member 1 [Source:HGNC Symbol;Acc:HGNC:11024]"
ENSG00000143318;286;ENSG00000143318;CASQ1;0	697348063;0	145393192;0	264915379;-0	451973861;0	794604858;8	380378648;1.00106256617494e-10 .;37 x 6;1 q23;"calsequestrin 1 [Source:HGNC Symbol;Acc:HGNC:1512]"
ENSG00000183723;326;ENSG00000183723;CMTM4;-0	959514042;0	19009001;0	24688845;-0	693583587;0	79311921;8	338073748;1.142902439355e-10 .;37 x 1;16 q22;"CKLF like MARVEL transmembrane domain containing 4 [Source:HGNC Symbol;Acc:HGNC:19175]"
ENSG00000213445;215;ENSG00000213445;SIPA1;-0	955713184;0	18472761;0	296138954;-0	591021475;0	793016652;8	33516824;1.15335963002394e-10 .;40 x 5;11 q13;"signal-induced proliferation-associated 1 [Source:HGNC Symbol;Acc:HGNC:10885]"
ENSG00000124575;590;ENSG00000124575;HIST1H1D;-0	441628832;0	150044197;0	131497126;-0	430336769;0	792713286;8	326584882;1.18481890964972e-10 .;40 x 6;6 p22;"histone cluster 1 H1 family member d [Source:HGNC Symbol;Acc:HGNC:4717]"
ENSG00000187583;140;ENSG00000187583;PLEKHN1;-0	433717257;0	273322614;0	341786221;-0	796606962;0	792585691;8	32297972;1.19829035583052e-10 .;40 x 1;1 p36;"pleckstrin homology domain containing N1 [Source:HGNC Symbol;Acc:HGNC:25284]"
ENSG00000163430;464;ENSG00000163430;FSTL1;-0	369671895;0	167148679;0	199845285;-0	643357784;0	792377297;8	317097931;1.22060139773339e-10 .;37 x 3;3 q13;"follistatin like 1 [Source:HGNC Symbol;Acc:HGNC:3972]"
ENSG00000103266;332;ENSG00000103266;STUB1;-1	136872309;0	18810429;0	243961744;-0	490446994;0	791396926;8	289532191;1.3308931734457e-10 .;38 x 2;16 p13;"STIP1 homology and U-box containing protein 1 [Source:HGNC Symbol;Acc:HGNC:11427]"
ENSG00000179902;379;ENSG00000179902;C1orf194;-1	02898714;0	158672409;0	230568854;-0	476202947;0	790840592;8	273965669;1.39757205808166e-10 .;35 x 1;1 p13;"chromosome 1 open reading frame 194 [Source:HGNC Symbol;Acc:HGNC:32331]"
ENSG00000103126;386;ENSG00000103126;AXIN1;-1	281792924;0	148847081;0	227425332;-0	373568798;0	790744894;8	271293502;1.40935263459596e-10 .;35 x 2;16 p13;"axin 1 [Source:HGNC Symbol;Acc:HGNC:903]"
ENSG00000101198;488;ENSG00000101198;NKAIN4;-0	94436834;0	186201834;0	193439244;-0	610131997;0	790589319;8	266952858;1.4287049321382e-10 .;40 x 5;20 q13;"sodium/potassium transporting ATPase interacting 4 [Source:HGNC Symbol;Acc:HGNC:16191]"
ENSG00000167183;14;ENSG00000167183;PRR15L;-0	372968544;0	226558467;0	64796361;-0	724935584;0	789653421;8	240930579;1.55048418548631e-10 .;40 x 3;17 q21;"proline rich 15 like [Source:HGNC Symbol;Acc:HGNC:28149]"
ENSG00000111875;346;ENSG00000111875;ASF1A;-0	046480233;0	162434335;0	2398459;-0	538250764;0	789434034;8	234852759;1.58040691644601e-10 .;40 x 6;6 q22;"anti-silencing function 1A histone chaperone [Source:HGNC Symbol;Acc:HGNC:20995]"
ENSG00000086991;352;ENSG00000086991;NOX4;-1	035435234;0	167357167;0	237378143;-0	55316855;0	788451393;8	207732568;1.72120317998292e-10 .;40 x 6;11 q14;"NADPH oxidase 4 [Source:HGNC Symbol;Acc:HGNC:7891]"
ENSG00000178522;222;ENSG00000178522;AMBN;-0	093733774;0	217807218;0	292697871;-0	731019653;0	788174659;8	200124965;1.76292980214043e-10 .;40 x 5;4 q13;"ameloblastin [Source:HGNC Symbol;Acc:HGNC:452]"
ENSG00000134762;452;ENSG00000134762;DSC3;-1	282996846;0	140233773;0	20347617;-0	330601901;0	787956865;8	194146891;1.79643411257757e-10 .;36 x 4;18 q12;"desmocollin 3 [Source:HGNC Symbol;Acc:HGNC:3037]"
ENSG00000001626;5;ENSG00000001626;CFTR;-0	437195677;0	328911506;0	733498767;-0	866999284;0	787729466;8	187913833;1.83205450809965e-10 .;39 x 1;7 q31;"cystic fibrosis transmembrane conductance regulator [Source:HGNC Symbol;Acc:HGNC:1884]"
ENSG00000130377;249;ENSG00000130377;ACSBG2;0	259264472;0	210782189;0	282261424;-0	640971997;0	787023809;8	168627676;1.94685156884589e-10 .;40 x 5;19 p13;"acyl-CoA synthetase bubblegum family member 2 [Source:HGNC Symbol;Acc:HGNC:24174]"
ENSG00000054654;9;ENSG00000054654;SYNE2;0	322531396;0	254947586;0	695299305;-0	678505718;0	78646337;8	153370517;2.04279482218794e-10 .;40 x 3;14 q23;"spectrin repeat containing nuclear envelope protein 2 [Source:HGNC Symbol;Acc:HGNC:17084]"
ENSG00000106341;240;ENSG00000106341;PPP1R17;-0	115278577;0	156404555;0	28653132;-0	442185874;0	786303366;8	149024323;2.07099115634435e-10 .;36 x 1;7 p14;"protein phosphatase 1 regulatory subunit 17 [Source:HGNC Symbol;Acc:HGNC:16973]"
ENSG00000122711;360;ENSG00000122711;SPINK4;0	703145636;0	171705703;0	235872164;-0	534347748;0	785057413;8	115326874;2.30337304785166e-10 .;40 x 5;9 p13;"serine peptidase inhibitor	Kazal type 4 [Source:HGNC Symbol;Acc:HGNC:16646]"
ENSG00000176532;172;ENSG00000176532;PRR15;-1	00778548;0	229153523;0	319111796;-0	607588776;0	784743587;8	106879895;2.36564545730289e-10 .;38 x 1;7 p14;"proline rich 15 [Source:HGNC Symbol;Acc:HGNC:22310]"
ENSG00000171243;132;ENSG00000171243;SOSTDC1;-0	401915107;0	170133689;0	349700195;-0	494003675;0	784504389;8	100452516;2.41416664437111e-10 .;37 x 2;7 p21;"sclerostin domain containing 1 [Source:HGNC Symbol;Acc:HGNC:21748]"
ENSG00000124191;431;ENSG00000124191;TOX2;-0	662062869;0	180405911;0	210453369;-0	601822351;0	784391321;8	09741761;2.437425816737e-10 .;36 x 1;20 q13;"TOX high mobility group box family member 2 [Source:HGNC Symbol;Acc:HGNC:16095]"
ENSG00000189334;42;ENSG00000189334;S100A14;0	969971984;0	170949903;0	470145613;-0	561806627;0	783937244;8	085250579;2.53296716934415e-10 .;40 x 6;1 q21;"S100 calcium binding protein A14 [Source:HGNC Symbol;Acc:HGNC:18901]"
ENSG00000144642;203;ENSG00000144642;RBMS3;-0	67263321;0	168173363;0	301792368;-0	518000147;0	78383647;8	08255489;2.55464094323088e-10 .;40 x 5;3 p24;"RNA binding motif single stranded interacting protein 3 [Source:HGNC Symbol;Acc:HGNC:13427]"
ENSG00000130037;262;ENSG00000130037;KCNA5;-0	960774004;0	156461365;0	278016334;-0	567326124;0	783065834;8	061995231;2.72623479347089e-10 .;40 x 6;12 p13;"potassium voltage-gated channel subfamily A member 5 [Source:HGNC Symbol;Acc:HGNC:6224]"
ENSG00000110195;107;ENSG00000110195;FOLR1;0	465749692;0	131005962;0	36352823;-0	379429745;0	782526553;8	047664974;2.85267809374545e-10 .;36 x 6;11 q13;"folate receptor 1 [Source:HGNC Symbol;Acc:HGNC:3791]"
ENSG00000198624;10;ENSG00000198624;CCDC69;-0	259139587;0	190458953;0	673385065;-0	539278699;0	781539812;8	021565178;3.09839154333247e-10 .;38 x 2;5 q33;"coiled-coil domain containing 69 [Source:HGNC Symbol;Acc:HGNC:24487]"
ENSG00000105137;185;ENSG00000105137;SYDE1;-0	72167657;0	152720424;0	311829292;-0	480105141;0	780391436;7	991384712;3.40930950137874e-10 .;38 x 5;19 p13;"synapse defective Rho GTPase homolog 1 [Source:HGNC Symbol;Acc:HGNC:25824]"
ENSG00000104870;391;ENSG00000104870;FCGRT;-0	010884347;0	140213631;0	225865814;-0	532348804;0	780284867;7	988594503;3.43959971615959e-10 .;35 x 3;19 q13;"Fc fragment of IgG receptor and transporter [Source:HGNC Symbol;Acc:HGNC:3621]"
ENSG00000054179;378;ENSG00000054179;ENTPD2;-0	208423342;0	152477502;0	230604883;-0	618498851;0	78023997;7	987419542;3.45243611477031e-10 .;35 x 2;9 q34;"ectonucleoside triphosphate diphosphohydrolase 2 [Source:HGNC Symbol;Acc:HGNC:3364]"
ENSG00000163788;6;ENSG00000163788;SNRK;-0	155182491;0	247009377;0	726844555;-0	680020519;0	780233157;7	987241259;3.4543878868476e-10 .;39 x 1;3 p22;"SNF related kinase [Source:HGNC Symbol;Acc:HGNC:30598]"
ENSG00000112559;196;ENSG00000112559;MDFI;-0	835268274;0	198062776;0	305145386;-0	509618796;0	779753266;7	974702541;3.59450247344739e-10 .;36 x 1;6 p21;"MyoD family inhibitor [Source:HGNC Symbol;Acc:HGNC:6967]"
ENSG00000110514;434;ENSG00000110514;MADD;-1	008087531;0	179219401;0	209669245;-0	688646696;0	779301032;7	962919285;3.73140185416787e-10 .;40 x 5;11 p11;"MAP kinase activating death domain [Source:HGNC Symbol;Acc:HGNC:6766]"
ENSG00000187634;414;ENSG00000187634;SAMD11;-1	144293272;0	183461116;0	217674611;-0	597614831;0	779156711;7	959165575;3.7761094251465e-10 .;40 x 5;1 p36;"sterile alpha motif domain containing 11 [Source:HGNC Symbol;Acc:HGNC:28706]"
ENSG00000198053;312;ENSG00000198053;SIRPA;-1	239664835;0	181622492;0	254845382;-0	473579642;0	778830857;7	950702129;3.87890608521957e-10 .;37 x 3;20 p13;"signal regulatory protein alpha [Source:HGNC Symbol;Acc:HGNC:9662]"
ENSG00000129353;256;ENSG00000129353;SLC44A2;-0	724144536;0	229988191;0	279944213;-0	731166438;0	778059545;7	930733865;4.13277856381455e-10 .;40 x 4;19 p13;"solute carrier family 44 member 2 [Source:HGNC Symbol;Acc:HGNC:17292]"
ENSG00000067182;366;ENSG00000067182;TNFRSF1A;-0	468480561;0	17791012;0	233084371;-0	592163216;0	776835348;7	899227313;4.56791493519404e-10 .;40 x 5;12 p13;"TNF receptor superfamily member 1A [Source:HGNC Symbol;Acc:HGNC:11916]"
ENSG00000134853;397;ENSG00000134853;PDGFRA;-0	778608372;0	158347353;0	225063288;-0	521861841;0	775647429;7	868870396;5.03090680226137e-10 .;35 x 1;4 q12;"platelet derived growth factor receptor alpha [Source:HGNC Symbol;Acc:HGNC:8803]"
ENSG00000170370;428;ENSG00000170370;EMX2;-1	125940461;0	13947046;0	211707792;-0	412247313;0	7754944;7	864975103;5.09364994627504e-10 .;35 x 4;10 q26;"empty spiracles homeobox 2 [Source:HGNC Symbol;Acc:HGNC:3341]"
ENSG00000143340;344;ENSG00000143340;FAM163A;-1	268602363;0	153015316;0	240198326;-0	382776564;0	775228039;7	858203268;5.20461229669422e-10 .;36 x 3;1 q25;"family with sequence similarity 163 member A [Source:HGNC Symbol;Acc:HGNC:28274]"
ENSG00000125878;515;ENSG00000125878;TCF15;0	046420345;0	194985146;0	180070786;-0	588557757;0	7743034;7	834777063;5.60763657730945e-10 .;40 x 5;20 p13;"transcription factor 15 [Source:HGNC Symbol;Acc:HGNC:11627]"
ENSG00000144028;403;ENSG00000144028;SNRNP200;-1	079265745;0	134425967;0	224311337;-0	323119611;0	773677982;7	819002924;5.89662207950425e-10 .;36 x 6;2 q11;"small nuclear ribonucleoprotein U5 subunit 200 [Source:HGNC Symbol;Acc:HGNC:30859]"
ENSG00000162493;385;ENSG00000162493;PDPN;-1	004074927;0	177055357;0	227979355;-0	486873078;0	773410677;7	812278395;6.02434324648016e-10 .;40 x 6;1 p36;"podoplanin [Source:HGNC Symbol;Acc:HGNC:29602]"
ENSG00000175426;396;ENSG00000175426;PCSK1;-1	267041156;0	119428855;0	225203274;-0	320319194;0	772634501;7	792811015;6.41005248880333e-10 .;36 x 6;5 q15;"proprotein convertase subtilisin/kexin type 1 [Source:HGNC Symbol;Acc:HGNC:8743]"
ENSG00000136014;36;ENSG00000136014;USP44;-0	081105661;0	229917916;0	507560816;-0	673988273;0	77173536;7	770367881;6.88576196061774e-10 .;40 x 5;12 q22;"ubiquitin specific peptidase 44 [Source:HGNC Symbol;Acc:HGNC:20064]"
ENSG00000150782;7;ENSG00000150782;IL18;-0	005299943;0	235420051;0	718845931;-0	607309079;0	769718546;7	720444352;8.07573008465567e-10 .;40 x 3;11 q23;"interleukin 18 [Source:HGNC Symbol;Acc:HGNC:5986]"
ENSG00000126217;188;ENSG00000126217;MCF2L;-0	75440537;0	270887586;0	31056456;-0	687293834;0	769354919;7	711503963;8.30978397203808e-10 .;40 x 1;13 q34;"MCF.2 cell line derived transforming sequence like [Source:HGNC Symbol;Acc:HGNC:14576]"
ENSG00000115239;454;ENSG00000115239;ASB3;-0	50766703;0	135798333;0	202659423;-0	470436507;0	769280674;7	709680771;8.35834845780425e-10 .;40 x 7;2 p16;"ankyrin repeat and SOCS box containing 3 [Source:HGNC Symbol;Acc:HGNC:16013]"
ENSG00000107562;447;ENSG00000107562;CXCL12;-0	093413949;0	164781359;0	204368825;-0	592056733;0	76884656;7	699035861;8.6476648064604e-10 .;37 x 3;10 q11;"C-X-C motif chemokine ligand 12 [Source:HGNC Symbol;Acc:HGNC:10672]"
ENSG00000151651;49;ENSG00000151651;ADAM8;-1	081011673;0	257550419;0	453063987;-0	652058092;0	768304419;7	685778572;9.02215080422764e-10 .;40 x 3;10 q26;"ADAM metallopeptidase domain 8 [Source:HGNC Symbol;Acc:HGNC:215]"
ENSG00000124678;216;ENSG00000124678;TCP11;0	445400272;0	144011116;0	296125544;-0	353254027;0	767376752;7	663187295;9.69838431785774e-10 .;36 x 5;6 p21;"t-complex 11 [Source:HGNC Symbol;Acc:HGNC:11658]"
ENSG00000089327;300;ENSG00000089327;FXYD5;-0	729981106;0	208951928;0	258446141;-0	766444334;0	767209662;7	659130659;9.8251207170108e-10 .;40 x 6;19 q13;"FXYD domain containing ion transport regulator 5 [Source:HGNC Symbol;Acc:HGNC:4029]"
ENSG00000185100;168;ENSG00000185100;ADSSL1;-1	107480164;0	191040152;0	321755593;-0	511636467;0	766687398;7	646475456;1.02313268968146e-09 .;37 x 1;14 q32;"adenylosuccinate synthase like 1 [Source:HGNC Symbol;Acc:HGNC:20093]"
ENSG00000157680;171;ENSG00000157680;DGKI;-1	188674757;0	169077795;0	319426187;-0	528925083;0	766362919;7	638631428;1.04915631737867e-09 .;39 x 5;7 q33;"diacylglycerol kinase iota [Source:HGNC Symbol;Acc:HGNC:2855]"
ENSG00000171522;486;ENSG00000171522;PTGER4;-1	318253065;0	147325617;0	194086094;-0	457334605;0	766320041;7	637595959;1.05264108540837e-09 .;37 x 5;5 p13;"prostaglandin E receptor 4 [Source:HGNC Symbol;Acc:HGNC:9596]"
ENSG00000128606;210;ENSG00000128606;LRRC17;-0	462686039;0	211368486;0	298672227;-0	845957879;0	765259371;7	612059779;1.14237574955212e-09 .;40 x 4;7 q22;"leucine rich repeat containing 17 [Source:HGNC Symbol;Acc:HGNC:16895]"
ENSG00000213599;242;ENSG00000213599;SLX1A-SULT1A3;-1	006173706;0	233008465;0	285926428;-0	580833149;0	76512017;7	608719578;1.15467035932681e-09 .;36 x 1;16 p11;"SLX1A-SULT1A3 readthrough (NMD candidate) [Source:HGNC Symbol;Acc:HGNC:44437]"
ENSG00000169627;241;ENSG00000169627;BOLA2;-1	005938332;0	23308475;0	28595524;-0	580967987;0	765075714;7	607653369;1.15862275329448e-09 .;36 x 1;16 p11;"bolA family member 2B [Source:HGNC Symbol;Acc:HGNC:32479]"
ENSG00000157890;69;ENSG00000157890;MEGF11;-1	030695139;0	217483199;0	410238099;-0	632999658;0	76423849;7	587622864;1.23546572972089e-09 .;36 x 1;15 q22;"multiple EGF like domains 11 [Source:HGNC Symbol;Acc:HGNC:29635]"
ENSG00000154556;301;ENSG00000154556;SORBS2;0	101530337;0	157147789;0	258158078;-0	444807195;0	764005996;7	582076866;1.25763621738884e-09 .;35 x 3;4 q35;"sorbin and SH3 domain containing 2 [Source:HGNC Symbol;Acc:HGNC:24098]"
ENSG00000159307;275;ENSG00000159307;SCUBE1;-1	252574944;0	154235574;0	271624859;-0	426509448;0	762614471;7	549030581;1.39831257683909e-09 .;35 x 1;22 q13;"signal peptide	CUB domain and EGF like domain containing 1 [Source:HGNC Symbol;Acc:HGNC:13441]"
ENSG00000197859;271;ENSG00000197859;ADAMTSL2;-0	870351686;0	220839995;0	273764911;-0	688391283;0	762165941;7	538432326;1.44670841972783e-09 .;40 x 5;9 q34;"ADAMTS like 2 [Source:HGNC Symbol;Acc:HGNC:14631]"
ENSG00000137309;176;ENSG00000137309;HMGA1;-0	284981501;0	227783525;0	316735995;-0	699837951;0	762124285;7	537449359;1.45128176143317e-09 .;36 x 1;6 p21;"high mobility group AT-hook 1 [Source:HGNC Symbol;Acc:HGNC:5010]"
ENSG00000168032;52;ENSG00000168032;ENTPD3;-0	524391718;0	269955266;0	446653499;-0	692422296;0	761954998;7	533456956;1.4700068939888e-09 .;37 x 1;3 p22;"ectonucleoside triphosphate diphosphohydrolase 3 [Source:HGNC Symbol;Acc:HGNC:3365]"
ENSG00000129474;564;ENSG00000129474;AJUBA;-0	962067189;0	189008828;0	158785215;-0	926097703;0	759581983;7	477877129;1.75746661668086e-09 .;36 x 1;14 q11;"ajuba LIM protein [Source:HGNC Symbol;Acc:HGNC:20250]"
ENSG00000007545;186;ENSG00000007545;CRAMP1;-1	102560619;0	200001007;0	311292159;-0	497072228;0	757828474;7	437261654;2.00280325657332e-09 .;35 x 1;16 p13;"cramped chromatin regulator homolog 1 [Source:HGNC Symbol;Acc:HGNC:14122]"
ENSG00000166482;257;ENSG00000166482;MFAP4;-0	497517649;0	150887333;0	278861909;-0	496236514;0	757422978;7	427923527;2.06392658519405e-09 .;38 x 5;17 p11;"microfibril associated protein 4 [Source:HGNC Symbol;Acc:HGNC:7035]"
ENSG00000119943;353;ENSG00000119943;PYROXD2;-0	360795887;0	17343467;0	23709494;-0	639210183;0	755269305;7	378662768;2.41888775676102e-09 .;40 x 7;10 q24;"pyridine nucleotide-disulphide oxidoreductase domain 2 [Source:HGNC Symbol;Acc:HGNC:23517]"
ENSG00000185231;290;ENSG00000185231;MC2R;-0	196278003;0	184444683;0	264217971;-0	630025017;0	755128407;7	375459563;2.44399411819529e-09 .;38 x 3;18 p11;"melanocortin 2 receptor [Source:HGNC Symbol;Acc:HGNC:6930]"
ENSG00000172350;77;ENSG00000172350;ABCG4;-0	581954101;0	208153952;0	400359764;-0	669986306;0	754819867;7	368453397;2.49982645694757e-09 .;40 x 4;11 q23;"ATP binding cassette subfamily G member 4 [Source:HGNC Symbol;Acc:HGNC:13884]"
ENSG00000095752;22;ENSG00000095752;IL11;-0	471549469;0	190600643;0	571246492;-0	505211768;0	754271453;7	356028374;2.60202059898518e-09 .;40 x 5;19 q13;"interleukin 11 [Source:HGNC Symbol;Acc:HGNC:5966]"
ENSG00000127831;94;ENSG00000127831;VIL1;0	146504971;0	181044059;0	37847455;-0	496721118;0	754021173;7	350369825;2.64994592935608e-09 .;40 x 6;2 q35;"villin 1 [Source:HGNC Symbol;Acc:HGNC:12690]"
ENSG00000168269;467;ENSG00000168269;FOXI1;0	545098802;0	129967205;0	199112276;-0	339777052;0	752969236;7	326667665;2.86054868681163e-09 .;37 x 6;5 q35;"forkhead box I1 [Source:HGNC Symbol;Acc:HGNC:3815]"
ENSG00000100985;277;ENSG00000100985;MMP9;-0	297808564;0	180802371;0	271224397;-0	573846155;0	752710348;7	32085437;2.91472712632412e-09 .;40 x 6;20 q13;"matrix metallopeptidase 9 [Source:HGNC Symbol;Acc:HGNC:7176]"
ENSG00000160994;147;ENSG00000160994;CCDC105;-0	823608176;0	148103087;0	335371374;-0	405955176;0	75182873;7	301116398;3.10651016022234e-09 .;39 x 7;19 p13;"coiled-coil domain containing 105 [Source:HGNC Symbol;Acc:HGNC:26866]"
ENSG00000116254;292;ENSG00000116254;CHD5;-1	22882855;0	133327917;0	26296327;-0	322202152;0	751618142;7	296415037;3.15403458905905e-09 .;36 x 6;1 p36;"chromodomain helicase DNA binding protein 5 [Source:HGNC Symbol;Acc:HGNC:16816]"
ENSG00000125462;101;ENSG00000125462;C1orf61;-0	697060559;0	244921213;0	369351758;-0	652511289;0	749744188;7	254803773;3.60791396758486e-09 .;36 x 1;1 q22;"chromosome 1 open reading frame 61 [Source:HGNC Symbol;Acc:HGNC:30780]"
ENSG00000215848;100;ENSG00000215848;;-0	697393876;0	244851077;0	369359137;-0	652295728;0	749686216;7	253522886;3.62288354871509e-09 .;36 x 1; ;
ENSG00000081148;509;ENSG00000081148;IMPG2;0	422040519;0	164991898;0	183996373;-0	545394604;0	74921051;7	243026672;3.74793174273691e-09 .;38 x 5;3 q12;"interphotoreceptor matrix proteoglycan 2 [Source:HGNC Symbol;Acc:HGNC:18362]"
ENSG00000167641;119;ENSG00000167641;PPP1R14A;0	904253143;0	1417852;0	357944901;-0	412961198;0	748658216;7	230872608;3.89817067514286e-09 .;37 x 6;19 q13;"protein phosphatase 1 regulatory inhibitor subunit 14A [Source:HGNC Symbol;Acc:HGNC:14871]"
ENSG00000099869;191;ENSG00000099869;IGF2-AS;-0	972960561;0	1954423;0	309241088;-0	628159108;0	748280471;7	222579507;4.00414923440451e-09 .;38 x 3;11 p15;"IGF2 antisense RNA [Source:HGNC Symbol;Acc:HGNC:14062]"
ENSG00000115756;281;ENSG00000115756;HPCAL1;-0	727778244;0	167927321;0	270121879;-0	536309443;0	746789061;7	189992079;4.44944536770464e-09 .;35 x 1;2 p25;"hippocalcin like 1 [Source:HGNC Symbol;Acc:HGNC:5145]"
ENSG00000107485;226;ENSG00000107485;GATA3;-1	211334477;0	216528828;0	291954402;-0	523499037;0	746658976;7	187161398;4.4904033824622e-09 .;36 x 1;10 p14;"GATA binding protein 3 [Source:HGNC Symbol;Acc:HGNC:4172]"
ENSG00000197308;225;ENSG00000197308;GATA3-AS1;-1	21117839;0	21658012;0	292020671;-0	523525076;0	746608692;7	18606771;4.50632975379506e-09 .;36 x 1;10 p14;"GATA3 antisense RNA 1 [Source:HGNC Symbol;Acc:HGNC:33786]"
ENSG00000188305;190;ENSG00000188305;C19orf35;-0	077063858;0	158427568;0	309706311;-0	425796369;0	746425645;7	182088728;4.56475302001991e-09 .;36 x 1;19 p13;"chromosome 19 open reading frame 35 [Source:HGNC Symbol;Acc:HGNC:24793]"
ENSG00000111046;318;ENSG00000111046;MYF6;0	126429234;0	135896295;0	250371875;-0	473126239;0	745307213;7	157856516;4.93738361306839e-09 .;36 x 5;12 q21;"myogenic factor 6 [Source:HGNC Symbol;Acc:HGNC:7566]"
ENSG00000100106;108;ENSG00000100106;TRIOBP;-0	227163255;0	155233503;0	363256836;-0	470404943;0	745164338;7	15477078;4.9869818274928e-09 .;40 x 6;22 q13;"TRIO and F-actin binding protein [Source:HGNC Symbol;Acc:HGNC:17009]"
ENSG00000185024;207;ENSG00000185024;BRF1;-0	900713296;0	206743318;0	299494241;-0	537767271;0	745076608;7	152877129;5.01766717064811e-09 .;36 x 1;14 q32;"BRF1	RNA polymerase III transcription initiation factor subunit [Source:HGNC Symbol;Acc:HGNC:11551]"
ENSG00000184012;213;ENSG00000184012;TMPRSS2;-0	617260957;0	214679896;0	29803026;-0	571241451;0	744826538;7	147483952;5.10610487225449e-09 .;39 x 3;21 q22;"transmembrane protease	serine 2 [Source:HGNC Symbol;Acc:HGNC:11876]"
ENSG00000168421;105;ENSG00000168421;RHOH;-0	200452579;0	183010975;0	365604602;-0	562115935;0	744691583;7	144576219;5.15443521198478e-09 .;40 x 6;4 p14;"ras homolog family member H [Source:HGNC Symbol;Acc:HGNC:686]"
ENSG00000166402;311;ENSG00000166402;TUB;-0	395136587;0	136624026;0	255140511;-0	440903936;0	744544102;7	141400879;5.20773957290999e-09 .;39 x 7;11 p15;"tubby bipartite transcription factor [Source:HGNC Symbol;Acc:HGNC:12406]"
ENSG00000092067;198;ENSG00000092067;CEBPE;0	524253933;0	146824538;0	304641542;-0	554760482;0	743921773;7	128027565;5.43839273614566e-09 .;38 x 6;14 q11;"CCAAT/enhancer binding protein epsilon [Source:HGNC Symbol;Acc:HGNC:1836]"
ENSG00000162148;228;ENSG00000162148;PPP1R32;0	3971902;0	173841274;0	29077809;-0	541317387;0	742165395;7	090507736;6.14188477854327e-09 .;37 x 3;11 q12;"protein phosphatase 1 regulatory subunit 32 [Source:HGNC Symbol;Acc:HGNC:28869]"
ENSG00000116035;263;ENSG00000116035;VAX2;-1	216433031;0	133349009;0	277657617;-0	318119501;0	740721365;7	059904141;6.78300959844336e-09 .;35 x 4;2 p13;"ventral anterior homeobox 2 [Source:HGNC Symbol;Acc:HGNC:12661]"
ENSG00000187244;204;ENSG00000187244;BCAM;-0	81664627;0	143255493;0	301350456;-0	368138503;0	740588817;7	057105943;6.84488821178775e-09 .;40 x 7;19 q13;"basal cell adhesion molecule (Lutheran blood group) [Source:HGNC Symbol;Acc:HGNC:6722]"
ENSG00000198648;235;ENSG00000198648;STK39;-1	206228431;0	185500296;0	288972079;-0	512270969;0	739862409;7	041803154;7.19347270639048e-09 .;36 x 1;2 q24;"serine/threonine kinase 39 [Source:HGNC Symbol;Acc:HGNC:17717]"
ENSG00000160781;513;ENSG00000160781;PAQR6;-0	335782525;0	156868234;0	181797197;-0	499972897;0	739114507;7	026104443;7.56964146919614e-09 .;40 x 7;1 q22;"progestin and adipoQ receptor family member 6 [Source:HGNC Symbol;Acc:HGNC:30132]"
ENSG00000160410;425;ENSG00000160410;SHKBP1;-1	109224767;0	120732056;0	213597854;-0	316205987;0	738995183;7	023605099;7.63132967929181e-09 .;36 x 6;19 q13;"SH3KBP1 binding protein 1 [Source:HGNC Symbol;Acc:HGNC:19214]"
ENSG00000178209;174;ENSG00000178209;PLEC;-0	745326863;0	143554137;0	31734115;-0	473902112;0	737152998;6	985202744;8.64530291799781e-09 .;36 x 6;8 q24;"plectin [Source:HGNC Symbol;Acc:HGNC:9069]"
ENSG00000123892;523;ENSG00000123892;RAB38;-0	846014592;0	168349303;0	175166642;-0	596078501;0	736878028;6	979500086;8.80701955807695e-09 .;40 x 7;11 q14;"RAB38	member RAS oncogene family [Source:HGNC Symbol;Acc:HGNC:9776]"
ENSG00000113140;417;ENSG00000113140;SPARC;-0	776686005;0	158840691;0	217029856;-0	620222465;0	736210672;6	965691166;9.21132770059785e-09 .;40 x 7;5 q33;"secreted protein acidic and cysteine rich [Source:HGNC Symbol;Acc:HGNC:11219]"
ENSG00000008394;244;ENSG00000008394;MGST1;0	135944694;0	17321171;0	283320737;-0	576965087;0	736004252;6	961428917;9.33985089268674e-09 .;37 x 3;12 p12;"microsomal glutathione S-transferase 1 [Source:HGNC Symbol;Acc:HGNC:7061]"
ENSG00000116396;93;ENSG00000116396;KCNC4;-1	293815838;0	241684756;0	379000471;-0	478235632;0	733496925;6	909992506;1.10406674913577e-08 .;37 x 1;1 p13;"potassium voltage-gated channel subfamily C member 4 [Source:HGNC Symbol;Acc:HGNC:6236]"
ENSG00000111696;413;ENSG00000111696;NT5DC3;-1	263463924;0	152313836;0	218405775;-0	317812673;0	733235319;6	904661219;1.1233871832772e-08 .;35 x 1;12 q23;"5'-nucleotidase domain containing 3 [Source:HGNC Symbol;Acc:HGNC:30826]"
ENSG00000069696;146;ENSG00000069696;DRD4;-1	23280212;0	184413202;0	336103271;-0	46526977;0	732827695;6	896367451;1.15412127632553e-08 .;38 x 4;11 p15;"dopamine receptor D4 [Source:HGNC Symbol;Acc:HGNC:3025]"
ENSG00000215211;145;ENSG00000215211;;-1	232656402;0	18446665;0	336285347;-0	465302207;0	732742628;6	894638641;1.16063337829431e-08 .;38 x 4; ;
ENSG00000182118;111;ENSG00000182118;FAM89A;-0	08974866;0	229360695;0	361113868;-0	714854163;0	732652622;6	892810228;1.16756084800329e-08 .;37 x 1;1 q42;"family with sequence similarity 89 member A [Source:HGNC Symbol;Acc:HGNC:25057]"
ENSG00000185602;130;ENSG00000185602;;0	284106721;0	170464405;0	350159282;-0	547626419;0	732646628;6	892688494;1.16802354455103e-08 .;38 x 5; ;
ENSG00000149292;206;ENSG00000149292;TTC12;-1	049716741;0	170224252;0	299593541;-0	554030443;0	731844163;6	876421815;1.23153838238466e-08 .;40 x 6;11 q23;"tetratricopeptide repeat domain 12 [Source:HGNC Symbol;Acc:HGNC:23700]"
ENSG00000118276;181;ENSG00000118276;B4GALT6;-1	085597335;0	140265843;0	312749277;-0	338505452;0	730545731;6	850231694;1.34117508210352e-08 .;35 x 3;18 q12;"beta-1	4-galactosyltransferase 6 [Source:HGNC Symbol;Acc:HGNC:929]"
ENSG00000127564;315;ENSG00000127564;PKMYT1;-1	012338214;0	209198838;0	251796072;-0	675425926;0	728888628;6	817038178;1.4943360882036e-08 .;36 x 1;16 p13;"protein kinase	membrane associated tyrosine/threonine 1 [Source:HGNC Symbol;Acc:HGNC:29650]"
ENSG00000198339;82;ENSG00000198339;;-0	805752647;0	193299074;0	394336263;-0	417750492;0	727977448;6	798895464;1.58535551353367e-08 .;36 x 1; ;
ENSG00000196132;291;ENSG00000196132;MYT1;-0	439892396;0	182329476;0	263735074;-0	648426739;0	726981706;6	779156628;1.69072014166716e-08 .;40 x 7;20 q13;"myelin transcription factor 1 [Source:HGNC Symbol;Acc:HGNC:7622]"
ENSG00000184232;66;ENSG00000184232;OAF;-1	155716983;0	206608617;0	41791938;-0	513102238;0	726732161;6	774224082;1.71813048233105e-08 .;36 x 1;11 q23;"out at first homolog [Source:HGNC Symbol;Acc:HGNC:28752]"
ENSG00000135919;227;ENSG00000135919;SERPINE2;-1	109689985;0	159291007;0	290868823;-0	473253137;0	724171668;6	723939072;2.02435099794229e-08 .;36 x 2;2 q36;"serpin family E member 2 [Source:HGNC Symbol;Acc:HGNC:8951]"
ENSG00000105610;544;ENSG00000105610;KLF1;0	927095502;0	174470559;0	16762566;-0	528247768;0	723364686;6	708212747;2.13094462075958e-08 .;40 x 6;19 p13;"Kruppel like factor 1 [Source:HGNC Symbol;Acc:HGNC:6345]"
ENSG00000188191;408;ENSG00000188191;PRKAR1B;-1	20345276;0	162469478;0	221129509;-0	604749923;0	722214618;6	685899956;2.29192308465187e-08 .;36 x 2;7 p22;"protein kinase cAMP-dependent type I regulatory subunit beta [Source:HGNC Symbol;Acc:HGNC:9390]"
ENSG00000006638;550;ENSG00000006638;TBXA2R;-0	947751408;0	144571447;0	164940186;-0	469566119;0	7191565;6	627129284;2.77681421190223e-08 .;40 x 7;19 p13;"thromboxane A2 receptor [Source:HGNC Symbol;Acc:HGNC:11608]"
ENSG00000184261;283;ENSG00000184261;KCNK12;-1	643151425;0	159758873;0	267797514;-0	382985948;0	718008829;6	605280444;2.98226623396403e-08 .;36 x 3;2 p16;"potassium two pore domain channel subfamily K member 12 [Source:HGNC Symbol;Acc:HGNC:6274]"
ENSG00000028137;65;ENSG00000028137;TNFRSF1B;-0	896613725;0	187990928;0	419312519;-0	420602322;0	717854683;6	60235439;3.01091512833196e-08 .;39 x 5;1 p36;"TNF receptor superfamily member 1B [Source:HGNC Symbol;Acc:HGNC:11917]"
ENSG00000140548;84;ENSG00000140548;ZNF710;-0	851545527;0	1580041;0	390260069;-0	452189489;0	716852864;6	583386134;3.20344885063051e-08 .;40 x 7;15 q26;"zinc finger protein 710 [Source:HGNC Symbol;Acc:HGNC:25352]"
ENSG00000168994;125;ENSG00000168994;PXDC1;-1	09600555;0	180208304;0	353590027;-0	517842447;0	7148392;6	545512785;3.62561969335928e-08 .;35 x 1;6 p25;"PX domain containing 1 [Source:HGNC Symbol;Acc:HGNC:21361]"
ENSG00000182809;133;ENSG00000182809;CRIP2;-1	54407948;0	245080655;0	34868352;-0	648445553;0	713916472;6	528269542;3.83589779939797e-08 .;36 x 1;14 q32;"cysteine rich protein 2 [Source:HGNC Symbol;Acc:HGNC:2361]"
ENSG00000048540;33;ENSG00000048540;LMO3;-0	404569057;0	206624861;0	51596363;-0	739257929;0	713307751;6	516932257;3.9807754981247e-08 .;38 x 1;12 p12;"LIM domain only 3 [Source:HGNC Symbol;Acc:HGNC:6643]"
ENSG00000070808;39;ENSG00000070808;CAMK2A;-0	095658132;0	243703103;0	484675815;-0	783019098;0	713161081;6	514205048;4.01643718284106e-08 .;37 x 1;5 q32;"calcium/calmodulin dependent protein kinase II alpha [Source:HGNC Symbol;Acc:HGNC:1460]"
ENSG00000001617;298;ENSG00000001617;SEMA3F;-1	336124773;0	175559556;0	258623405;-0	408120957;0	71240948;6	500256942;4.20389739685945e-08 .;40 x 5;3 p21;"semaphorin 3F [Source:HGNC Symbol;Acc:HGNC:10728]"
ENSG00000216243;212;ENSG00000216243;;-0	796527512;0	15864091;0	298489748;-0	440425013;0	711673891;6	486649966;4.39522396256109e-08 .;35 x 3; ;
ENSG00000198075;439;ENSG00000198075;SULT1C4;-0	633909434;0	160175885;0	208605347;-0	535420901;0	710375829;6	462743614;4.75275667710662e-08 .;40 x 7;2 q12;"sulfotransferase family 1C member 4 [Source:HGNC Symbol;Acc:HGNC:11457]"
ENSG00000007402;19;ENSG00000007402;CACNA2D2;-0	063199248;0	155025208;0	583254763;-0	363487121;0	710299557;6	461343068;4.77458450554025e-08 .;36 x 6;3 p21;"calcium voltage-gated channel auxiliary subunit alpha2delta 2 [Source:HGNC Symbol;Acc:HGNC:1400]"
ENSG00000109132;116;ENSG00000109132;PHOX2B;-0	822956039;0	16449297;0	359052454;-0	454349049;0	709945372;6	454845374;4.87717453090397e-08 .;36 x 5;4 p13;"paired like homeobox 2b [Source:HGNC Symbol;Acc:HGNC:9143]"
ENSG00000085117;297;ENSG00000085117;CD82;-1	14731784;0	170222578;0	259518238;-0	400336149;0	709371086;6	444330792;5.04788746358287e-08 .;40 x 7;11 p11;"CD82 molecule [Source:HGNC Symbol;Acc:HGNC:6210]"
ENSG00000149926;80;ENSG00000149926;FAM57B;-0	571000444;0	215199376;0	396728019;-0	817748856;0	705996528;6	383063899;6.16868952585392e-08 .;37 x 1;16 p11;"family with sequence similarity 57 member B [Source:HGNC Symbol;Acc:HGNC:25295]"
ENSG00000170745;490;ENSG00000170745;KCNS3;-1	332342733;0	149050179;0	192937117;-0	415390093;0	704450008;6	355277178;6.75615313694422e-08 .;35 x 1;2 p24;"potassium voltage-gated channel modifier subfamily S member 3 [Source:HGNC Symbol;Acc:HGNC:6302]"
ENSG00000144711;276;ENSG00000144711;IQSEC1;-0	965814828;0	157594239;0	271390899;-0	482671716;0	703615855;6	340364497;7.09421856814885e-08 .;35 x 2;3 p25;"IQ motif and Sec7 domain 1 [Source:HGNC Symbol;Acc:HGNC:29112]"
ENSG00000167880;551;ENSG00000167880;EVPL;0	564752489;0	13418743;0	164738616;-0	394058866;0	703528929;6	338813461;7.13033863064538e-08 .;40 x 7;17 q25;"envoplakin [Source:HGNC Symbol;Acc:HGNC:3503]"
ENSG00000100987;41;ENSG00000100987;VSX1;-0	852207494;0	191214456;0	47590156;-0	540072507;0	702022883;6	312029834;7.78393982603376e-08 .;37 x 1;20 p11;"visual system homeobox 1 [Source:HGNC Symbol;Acc:HGNC:12723]"
ENSG00000112655;435;ENSG00000112655;PTK7;-1	462500946;0	142213648;0	209419752;-0	319557243;0	70174571;6	307118823;7.91013692325038e-08 .;35 x 4;6 p21;"protein tyrosine kinase 7 (inactive) [Source:HGNC Symbol;Acc:HGNC:9618]"
ENSG00000132702;288;ENSG00000132702;HAPLN2;-0	277728095;0	175207256;0	264851933;-0	509765449;0	700258294;6	280860554;8.62048106231583e-08 .;40 x 7;1 q23;"hyaluronan and proteoglycan link protein 2 [Source:HGNC Symbol;Acc:HGNC:17410]"
ENSG00000163412;260;ENSG00000163412;EIF4E3;-0	843837519;0	159675213;0	278317834;-0	446026818;0	700005535;6	276414456;8.74692975827429e-08 .;35 x 1;3 p13;"eukaryotic translation initiation factor 4E family member 3 [Source:HGNC Symbol;Acc:HGNC:31837]"
ENSG00000170837;259;ENSG00000170837;GPR27;-0	844131958;0	159616313;0	278345797;-0	445850782;0	699933437;6	275147069;8.78331366527263e-08 .;35 x 1;3 p13;"G protein-coupled receptor 27 [Source:HGNC Symbol;Acc:HGNC:4482]"
ENSG00000173253;141;ENSG00000173253;DMRT2;-0	725803532;0	161841539;0	341758889;-0	432802613;0	698789015;6	255080053;9.38000688233132e-08 .;35 x 2;9 p24;"doublesex and mab-3 related transcription factor 2 [Source:HGNC Symbol;Acc:HGNC:2935]"
ENSG00000163499;104;ENSG00000163499;CRYBA2;-1	516265548;0	192472208;0	36590768;-0	432132248;0	698315526;6	246805109;9.6377263836267e-08 .;39 x 5;2 q35;"crystallin beta A2 [Source:HGNC Symbol;Acc:HGNC:2395]"
ENSG00000122971;162;ENSG00000122971;ACADS;-1	180897757;0	151629824;0	32684248;-0	381296851;0	697289009;6	228920002;1.02192228235154e-07 .;36 x 5;12 q24;"acyl-CoA dehydrogenase	C-2 to C-3 short chain [Source:HGNC Symbol;Acc:HGNC:90]"
ENSG00000163053;30;ENSG00000163053;SLC16A14;-0	452509444;0	308689506;0	538436753;-0	897352433;0	696756941;6	219679141;1.05332978894701e-07 .;36 x 1;2 q36;"solute carrier family 16 member 14 [Source:HGNC Symbol;Acc:HGNC:26417]"
ENSG00000105707;29;ENSG00000105707;HPN;0	06540813;0	186763733;0	54671716;-0	498817947;0	696010895;6	206755501;1.09888098398514e-07 .;40 x 7;19 q13;"hepsin [Source:HGNC Symbol;Acc:HGNC:5155]"
ENSG00000172059;97;ENSG00000172059;KLF11;-0	879656935;0	164229604;0	371494294;-0	39722566;0	695983565;6	206282812;1.10058390401235e-07 .;35 x 3;2 p25;"Kruppel like factor 11 [Source:HGNC Symbol;Acc:HGNC:11811]"
ENSG00000140090;60;ENSG00000140090;SLC24A4;-0	66620997;0	173883057;0	428326634;-0	51971861;0	695269969;6	193959151;1.14592544120384e-07 .;40 x 6;14 q32;"solute carrier family 24 member 4 [Source:HGNC Symbol;Acc:HGNC:10978]"
ENSG00000165966;57;ENSG00000165966;PDZRN4;-0	451681911;0	214936647;0	430795436;-0	653865092;0	690883643;6	118979298;1.46500302777852e-07 .;40 x 6;12 q12;"PDZ domain containing ring finger 4 [Source:HGNC Symbol;Acc:HGNC:30552]"
ENSG00000181481;245;ENSG00000181481;RNF135;-1	121814177;0	208426337;0	283172145;-0	772219562;0	69003123;6	104559626;1.53587363271868e-07 .;37 x 1;17 q11;"ring finger protein 135 [Source:HGNC Symbol;Acc:HGNC:21158]"
ENSG00000105088;134;ENSG00000105088;OLFM2;-1	012784473;0	169760929;0	348575018;-0	520369552;0	689876688;6	10195056;1.54905834159891e-07 .;40 x 6;19 p13;"olfactomedin 2 [Source:HGNC Symbol;Acc:HGNC:17189]"
ENSG00000100253;338;ENSG00000100253;MIOX;0	600765197;0	175123278;0	242125009;-0	555457302;0	689752436;6	099854012;1.55973504556428e-07 .;40 x 6;22 q13;"myo-inositol oxygenase [Source:HGNC Symbol;Acc:HGNC:14522]"
ENSG00000015592;254;ENSG00000015592;STMN4;-0	510631982;0	204798322;0	280423373;-0	627454959;0	687466404;6	061463372;1.7687800502042e-07 .;40 x 6;8 p21;"stathmin 4 [Source:HGNC Symbol;Acc:HGNC:16078]"
ENSG00000184887;53;ENSG00000184887;BTBD6;-0	468881974;0	273378242;0	442563877;-0	673048642;0	686923499;6	052396512;1.82210752375234e-07 .;37 x 1;14 q32;"BTB domain containing 6 [Source:HGNC Symbol;Acc:HGNC:19897]"
ENSG00000184925;34;ENSG00000184925;LCN12;0	376158646;0	179429428;0	511916642;-0	687506043;0	686386228;6	043442625;1.87634741077858e-07 .;39 x 6;9 q34;"lipocalin 12 [Source:HGNC Symbol;Acc:HGNC:28733]"
ENSG00000196374;113;ENSG00000196374;;-1	027335623;0	221706426;0	36076115;-0	446373565;0	686188823;6	040157472;1.89664999039607e-07 .;36 x 1; ;
ENSG00000163602;350;ENSG00000163602;;-0	656456199;0	147615368;0	237593463;-0	431684742;0	685715331;6	032288049;1.9461811673338e-07 .;35 x 1;3 p13;"RING1 and YY1 binding protein [Source:HGNC Symbol;Acc:HGNC:10480]"
ENSG00000006327;137;ENSG00000006327;TNFRSF12A;-0	810499098;0	234198697;0	345602311;-0	666109081;0	685457849;6	028014768;1.9736171896767e-07 .;40 x 6;16 p13;"TNF receptor superfamily member 12A [Source:HGNC Symbol;Acc:HGNC:18152]"
ENSG00000101188;232;ENSG00000101188;NTSR1;-1	427192148;0	21803487;0	289735761;-0	687631646;0	683854812;6	001505746;2.1526640237024e-07 .;35 x 1;20 q13;"neurotensin receptor 1 [Source:HGNC Symbol;Acc:HGNC:8039]"
ENSG00000091436;74;ENSG00000091436;MAP3K20;-0	907440304;0	245641636;0	402353709;-0	696850695;0	682745924;5	983263998;2.28521160661188e-07 .;35 x 1;2 q31;"mitogen-activated protein kinase kinase kinase 20 [Source:HGNC Symbol;Acc:HGNC:17797]"
ENSG00000120094;165;ENSG00000120094;;-0	991454972;0	219949093;0	323755818;-0	675658171;0	68030219;5	943335815;2.60448094646648e-07 .;40 x 4;17 q21;"homeobox B1 [Source:HGNC Symbol;Acc:HGNC:5111]"
ENSG00000163956;173;ENSG00000163956;LRPAP1;-0	269131029;0	195976617;0	317951544;-0	813481842;0	678809391;5	919126962;2.8193674683763e-07 .;36 x 1;4 p16;"LDL receptor related protein associated protein 1 [Source:HGNC Symbol;Acc:HGNC:6701]"
ENSG00000111817;144;ENSG00000111817;DSE;-0	920559112;0	160167129;0	338741687;-0	48031393;0	678646339;5	916491006;2.84380863746492e-07 .;40 x 7;6 q22;"dermatan sulfate epimerase [Source:HGNC Symbol;Acc:HGNC:21144]"
ENSG00000004776;465;ENSG00000004776;HSPB6;-0	907316128;0	172056457;0	199729123;-0	477214407;0	673856472;5	839771331;3.65578772032471e-07 .;40 x 7;19 q13;"heat shock protein family B (small) member 6 [Source:HGNC Symbol;Acc:HGNC:26511]"
ENSG00000167595;466;ENSG00000167595;PROSER3;-0	907596781;0	171987912;0	199719168;-0	477028152;0	673824211;5	839259242;3.66192022260847e-07 .;40 x 7;19 q13;"proline and serine rich 3 [Source:HGNC Symbol;Acc:HGNC:25204]"
ENSG00000101180;192;ENSG00000101180;HRH3;-1	505686355;0	188607688;0	308635203;-0	436332105;0	672872394;5	824177928;3.84720179491538e-07 .;38 x 5;20 q13;"histamine receptor H3 [Source:HGNC Symbol;Acc:HGNC:5184]"
ENSG00000080166;8;ENSG00000080166;DCT;-0	137502684;0	262351082;0	701346937;-0	762179034;0	671222129;5	798154939;4.18916338063013e-07 .;40 x 6;13 q32;"dopachrome tautomerase [Source:HGNC Symbol;Acc:HGNC:2709]"
ENSG00000105131;341;ENSG00000105131;EPHX3;-0	88370866;0	134935359;0	241474776;-0	596779615;0	666073401;5	717964399;5.44547135494788e-07 .;38 x 7;19 p13;"epoxide hydrolase 3 [Source:HGNC Symbol;Acc:HGNC:23760]"
ENSG00000067606;546;ENSG00000067606;PRKCZ;-1	140488742;0	160113577;0	167357553;-0	501624394;0	665969286;5	716358177;5.47414302776161e-07 .;35 x 3;1 p36;"protein kinase C zeta [Source:HGNC Symbol;Acc:HGNC:9412]"
ENSG00000213085;79;ENSG00000213085;CFAP45;-0	790044564;0	186345969;0	398640069;-0	530869974;0	664165197;5	688620673;5.99368683795731e-07 .;40 x 6;1 q23;"cilia and flagella associated protein 45 [Source:HGNC Symbol;Acc:HGNC:17229]"
ENSG00000110931;40;ENSG00000110931;CAMKK2;-0	811278149;0	272085628;0	477057506;-0	859920019;0	663696443;5	681442869;6.13595395604349e-07 .;40 x 4;12 q24;"calcium/calmodulin dependent protein kinase kinase 2 [Source:HGNC Symbol;Acc:HGNC:1470]"
ENSG00000139737;328;ENSG00000139737;SLAIN1;-0	352421534;0	171520097;0	246355169;-0	50190955;0	66277078;5	667303758;6.42611292622774e-07 .;40 x 7;13 q22;"SLAIN motif family member 1 [Source:HGNC Symbol;Acc:HGNC:26387]"
ENSG00000130487;175;ENSG00000130487;KLHDC7B;-0	416482141;0	246615714;0	31727157;-0	713909592;0	660459033;5	632194439;7.20709708579292e-07 .;40 x 5;22 q13;"kelch domain containing 7B [Source:HGNC Symbol;Acc:HGNC:25145]"
ENSG00000099910;362;ENSG00000099910;KLHL22;-1	493399469;0	149499992;0	234794317;-0	353437039;0	660020752;5	625570298;7.36471518658632e-07 .;35 x 4;22 q11;"kelch like family member 22 [Source:HGNC Symbol;Acc:HGNC:25888]"
ENSG00000167996;355;ENSG00000167996;FTH1;-0	682305684;0	165207548;0	236970586;-0	561514658;0	659019417;5	61047433;7.73685947086378e-07 .;40 x 7;11 q12;"ferritin heavy chain 1 [Source:HGNC Symbol;Acc:HGNC:3976]"
ENSG00000122735;217;ENSG00000122735;DNAI1;-1	047770362;0	160768351;0	295357093;-0	394322732;0	658755757;5	606508229;7.83769938283996e-07 .;36 x 5;9 p13;"dynein axonemal intermediate chain 1 [Source:HGNC Symbol;Acc:HGNC:2954]"
ENSG00000183145;44;ENSG00000183145;RIPPLY3;0	545418232;0	176302398;0	464642591;-0	44195389;0	65750724;5	587776831;8.33192335347732e-07 .;40 x 7;21 q22;"ripply transcriptional repressor 3 [Source:HGNC Symbol;Acc:HGNC:3047]"
ENSG00000180549;23;ENSG00000180549;FUT7;0	823863318;0	165120719;0	567382635;-0	45939039;0	657364118;5	585634777;8.39038194255792e-07 .;40 x 7;9 q34;"fucosyltransferase 7 [Source:HGNC Symbol;Acc:HGNC:4018]"
ENSG00000004799;418;ENSG00000004799;PDK4;-0	859225209;0	168312212;0	21662939;-0	591128931;0	655470245;5	557389717;9.20049874286732e-07 .;40 x 7;7 q21;"pyruvate dehydrogenase kinase 4 [Source:HGNC Symbol;Acc:HGNC:8812]"
ENSG00000162374;199;ENSG00000162374;ELAVL4;0	114215063;0	164557905;0	304440978;-0	453739145;0	654829738;5	547878967;9.49043992726217e-07 .;35 x 1;1 p33;"ELAV like RNA binding protein 4 [Source:HGNC Symbol;Acc:HGNC:3315]"
ENSG00000173585;511;ENSG00000173585;CCR9;0	812492387;0	158939442;0	183438481;-0	552174121;0	653982101;5	535324745;9.88712983707174e-07 .;36 x 5;3 p21;"C-C motif chemokine receptor 9 [Source:HGNC Symbol;Acc:HGNC:1610]"
ENSG00000185155;3;ENSG00000185155;MIXL1;0	112075894;0	190202449;0	78839745;-0	38582048;0	650744051;5	487699954;1.15478243922773e-06 .;36 x 6;1 q42;"Mix paired-like homeobox [Source:HGNC Symbol;Acc:HGNC:13363]"
ENSG00000113749;95;ENSG00000113749;HRH2;0	219691734;0	204325637;0	373733652;-0	632635444;0	647733002;5	443880135;1.33196394802582e-06 .;36 x 1;5 q35;"histamine receptor H2 [Source:HGNC Symbol;Acc:HGNC:5183]"
ENSG00000079102;233;ENSG00000079102;RUNX1T1;-0	438755474;0	174543248;0	289696823;-0	665575512;0	643139502;5	37787442;1.6510931070135e-06 .;37 x 5;8 q21;"RUNX1 translocation partner 1 [Source:HGNC Symbol;Acc:HGNC:1535]"
ENSG00000129038;31;ENSG00000129038;LOXL1;-0	675813875;0	236793131;0	536085778;-0	683427698;0	628502345;5	174002073;3.19881511556819e-06 .;40 x 6;15 q24;"lysyl oxidase like 1 [Source:HGNC Symbol;Acc:HGNC:6665]"
ENSG00000144230;2;ENSG00000144230;GPR17;-0	189646724;0	262660168;0	862492266;-0	740950494;0	626315311;5	144343146;3.52081649790392e-06 .;40 x 6;2 q14;"G protein-coupled receptor 17 [Source:HGNC Symbol;Acc:HGNC:4471]"
ENSG00000068793;103;ENSG00000068793;;-0	989990369;0	19124743;0	367720099;-0	440683882;0	621460008;5	079209303;4.34499213119999e-06 .;35 x 1; ;
ENSG00000103852;71;ENSG00000103852;TTC23;-1	073561659;0	185316453;0	409049755;-0	420024505;0	620593289;5	067683467;4.50955387232277e-06 .;36 x 5;15 q26;"tetratricopeptide repeat domain 23 [Source:HGNC Symbol;Acc:HGNC:25730]"
ENSG00000188038;43;ENSG00000188038;NRN1L;-0	704483088;0	211290055;0	469695326;-0	70793261;0	618406956;5	038742925;4.95044709303283e-06 .;40 x 7;16 q22;"neuritin 1 like [Source:HGNC Symbol;Acc:HGNC:29811]"
ENSG00000143001;307;ENSG00000143001;TMEM61;0	564756039;0	163707411;0	255622264;-0	560858206;0	617877583;5	031764196;5.06299295477408e-06 .;35 x 4;1 p32;"transmembrane protein 61 [Source:HGNC Symbol;Acc:HGNC:27296]"
ENSG00000149782;149;ENSG00000149782;PLCB3;-1	492471559;0	202754941;0	334379839;-0	384067404;0	612906639;4	966766898;6.24052441033918e-06 .;37 x 5;11 q13;"phospholipase C beta 3 [Source:HGNC Symbol;Acc:HGNC:9056]"
ENSG00000184900;83;ENSG00000184900;SUMO3;-0	916999051;0	244653536;0	391329846;-0	457474123;0	611533871;4	9489851;6.60736860313982e-06 .;36 x 1;21 q22;"small ubiquitin-like modifier 3 [Source:HGNC Symbol;Acc:HGNC:11124]"
ENSG00000101004;160;ENSG00000101004;NINL;-1	222584421;0	17863333;0	326957508;-0	350622782;0	610339887;4	93357722;6.94241791654449e-06 .;35 x 1;20 p11;"ninein like [Source:HGNC Symbol;Acc:HGNC:29163]"
ENSG00000134369;45;ENSG00000134369;NAV1;-0	585501558;0	196820225;0	459579267;-0	401928198;0	60908405;4	917428961;7.31158750200134e-06 .;36 x 1;1 q32;"neuron navigator 1 [Source:HGNC Symbol;Acc:HGNC:15989]"
ENSG00000078725;55;ENSG00000078725;BRINP1;-0	799325666;0	25105884;0	435819086;-0	733742787;0	604244417;4	855743991;8.90905046835311e-06 .;35 x 1;9 q33;"BMP/retinoic acid inducible neural specific 1 [Source:HGNC Symbol;Acc:HGNC:2687]"
ENSG00000177272;25;ENSG00000177272;KCNA3;-0	461421999;0	220668323;0	563587796;-0	52387879;0	603850609;4	85076219;9.05217639313172e-06 .;36 x 1;1 p13;"potassium voltage-gated channel subfamily A member 3 [Source:HGNC Symbol;Acc:HGNC:6221]"
ENSG00000139438;343;ENSG00000139438;FAM222A;-0	286301229;0	180098283;0	240579305;-0	567507174;0	601518477;4	82137409;9.94385182750968e-06 .;40 x 7;12 q24;"family with sequence similarity 222 member A [Source:HGNC Symbol;Acc:HGNC:25915]"
ENSG00000185668;339;ENSG00000185668;POU3F1;-0	665529867;0	17549503;0	242096482;-0	681035846;0	595422898;4	745466381;1.26678006806547e-05 .;40 x 7;1 p34;"POU class 3 homeobox 1 [Source:HGNC Symbol;Acc:HGNC:9214]"
ENSG00000205426;32;ENSG00000205426;KRT81;0	09431359;0	169788931;0	531069634;-0	446161504;0	594401652;4	732874402;1.31858622500758e-05 .;36 x 6;12 q13;"keratin 81 [Source:HGNC Symbol;Acc:HGNC:6458]"
ENSG00000134184;48;ENSG00000134184;GSTM1;-0	501838705;0	269498883;0	453260326;-1	123757754;0	58810264;4	655981743;1.68336679495784e-05 .;40 x 4;1 p13;"glutathione S-transferase mu 1 [Source:HGNC Symbol;Acc:HGNC:4632]"
ENSG00000107338;64;ENSG00000107338;SHB;-0	476701124;0	230068919;0	419355963;-0	63698384;0	572012015;4	465327951;3.07148352332032e-05 .;40 x 7;9 p13;"SH2 domain containing adaptor protein B [Source:HGNC Symbol;Acc:HGNC:10838]"
ENSG00000167695;126;ENSG00000167695;FAM57A;-1	341494785;0	170303235;0	352497007;-0	392230391;0	570351042;4	446096788;3.26238650235622e-05 .;35 x 2;17 p13;"family with sequence similarity 57 member A [Source:HGNC Symbol;Acc:HGNC:29646]"
ENSG00000118785;78;ENSG00000118785;SPP1;-0	318430096;0	228289365;0	400337406;-0	700473728;0	563190686;4	364107778;4.2153352990848e-05 .;40 x 7;4 q22;"secreted phosphoprotein 1 [Source:HGNC Symbol;Acc:HGNC:11255]"
ENSG00000103067;28;ENSG00000103067;ESRP2;-0	984891384;0	227941245;0	547053486;-0	812244415;0	555781591;4	280785785;5.4617553103653e-05 .;35 x 1;16 q22;"epithelial splicing regulatory protein 2 [Source:HGNC Symbol;Acc:HGNC:26152]"
ENSG00000169884;349;ENSG00000169884;WNT10B;-0	640927982;0	213382397;0	238064409;-0	688423631;0	543200899;4	142652974;8.36347917367863e-05 .;40 x 7;12 q13;"Wnt family member 10B [Source:HGNC Symbol;Acc:HGNC:12775]"
ENSG00000148219;117;ENSG00000148219;ASTN2;-0	892303984;0	174101226;0	358533128;-0	325304627;0	47249389;3	432793094;0.00068891034763563 .;35 x 1;9 q33;"astrotactin 2 [Source:HGNC Symbol;Acc:HGNC:17021]"
ENSG00000179344;164;ENSG00000179344;HLA-DQB1;0	35122754;0	249312604;0	323912713;-0	530198629;0	46104113;3	326768391;0.000930781155999982 .;35 x 1;6 p21;"major histocompatibility complex	class II	DQ beta 1 [Source:HGNC Symbol;Acc:HGNC:4944]"
ENSG00000179046;37;ENSG00000179046;TRIML2;0	732868294;0	443828203;0	487568684;-1	271293114;0	330165043;2	23968194;0.0152982765539528 .;36 x 1;4 q35;"tripartite motif family like 2 [Source:HGNC Symbol;Acc:HGNC:26378]"
