# Supplementary material for: The Transcriptome and Methylome of the Developing and Aging Brain and Their Relations to Gliomas and Psychological Disorders
Source: Cells. 2022 Jan 21;11(3):362. doi: 10.3390/cells11030362 (PMC8834030; doi:10.3390/cells11030362)
Supplement: Supplementary file 1 [file cells-11-00362-s001.zip › Supplementary_Table_S1-Expression_Spots.csv]

;Rank;ID;Symbol;mean expression;SD;max delta e;min delta e;correlation;->t.score;->p.value;Metagene;Chromosome;Description
227084_at;930;227084_at;DTNA;2	150924875;0	144657817;0	346501722;-0	244213286;0	94522806;18	76708948;0 .;1 x 37;18 q12;"dystrobrevin alpha [Source:HGNC Symbol;Acc:HGNC:3057]"
201034_at;933;201034_at;ADD3;2	436664629;0	149495881;0	343297937;-0	285754006;0	936467346;17	30269274;0 .;1 x 37;10 q25;"adducin 3 [Source:HGNC Symbol;Acc:HGNC:245]"
212226_s_at;360;212226_s_at;PLPP3;1	948237342;0	27542841;0	583543885;-0	597682101;0	931407673;16	58401612;0 .;1 x 40;1 p32;"phospholipid phosphatase 3 [Source:HGNC Symbol;Acc:HGNC:9229]"
229975_at;439;229975_at;BMPR1B;1	185737927;0	301529598;0	550130551;-0	69314217;0	916822716;14	8804707;0 .;1 x 40;4 q22;"bone morphogenetic protein receptor type 1B [Source:HGNC Symbol;Acc:HGNC:1077]"
201976_s_at;891;201976_s_at;;1	93979829;0	19599371;0	374848079;-0	422349657;0	910526641;14	27229725;0 .;1 x 39;5 p15;"myosin X [Source:HGNC Symbol;Acc:HGNC:7593]"
240242_at;351;240242_at;;1	069703734;0	344732682;0	586995357;-0	916796651;0	904821463;13	77180575;0 .;1 x 40; ;
209355_s_at;340;209355_s_at;PLPP3;1	661127126;0	340709602;0	591342589;-0	683089779;0	899656486;13	35423977;0 .;1 x 40;1 p32;"phospholipid phosphatase 3 [Source:HGNC Symbol;Acc:HGNC:9229]"
202975_s_at;588;202975_s_at;RHOBTB3;1	642720587;0	233532851;0	49536261;-0	490876222;0	899434038;13	33694466;0 .;1 x 39;5 q15;"Rho related BTB domain containing 3 [Source:HGNC Symbol;Acc:HGNC:18757]"
225202_at;611;225202_at;RHOBTB3;1	963893832;0	231227902;0	487493845;-0	528128111;0	894215764;12	94618375;2.22044604925031e-16 .;1 x 40;5 q15;"Rho related BTB domain containing 3 [Source:HGNC Symbol;Acc:HGNC:18757]"
201753_s_at;919;201753_s_at;ADD3;2	267298369;0	153370755;0	358005368;-0	315796705;0	894074601;12	9359941;2.22044604925031e-16 .;1 x 38;10 q25;"adducin 3 [Source:HGNC Symbol;Acc:HGNC:245]"
201612_at;1011;201612_at;ALDH9A1;2	011902757;0	129967887;0	256527581;-0	219905869;0	891111553;12	72644909;2.22044604925031e-16 .;1 x 37;1 q24;"aldehyde dehydrogenase 9 family member A1 [Source:HGNC Symbol;Acc:HGNC:412]"
207761_s_at;773;207761_s_at;METTL7A;2	1219608;0	228949507;0	427934276;-0	483914747;0	889423893;12	61066786;3.33066907387547e-16 .;1 x 40;12 q13;"methyltransferase like 7A [Source:HGNC Symbol;Acc:HGNC:24550]"
224882_at;415;224882_at;ACSS1;0	949627416;0	244544995;0	557705162;-0	62434651;0	888834665;12	57083035;4.44089209850063e-16 .;1 x 40;20 p11;"acyl-CoA synthetase short chain family member 1 [Source:HGNC Symbol;Acc:HGNC:16091]"
201397_at;636;201397_at;PHGDH;1	25470528;0	281737295;0	478476;-0	603507477;0	887548828;12	48492129;4.44089209850063e-16 .;1 x 40;1 p12;"phosphoglycerate dehydrogenase [Source:HGNC Symbol;Acc:HGNC:8923]"
209513_s_at;905;209513_s_at;HSDL2;1	508349264;0	190287344;0	367363298;-0	459273904;0	887241649;12	46460305;5.55111512312578e-16 .;1 x 39;9 q32;"hydroxysteroid dehydrogenase like 2 [Source:HGNC Symbol;Acc:HGNC:18572]"
201667_at;465;201667_at;GJA1;2	518404026;0	30239894;0	542349031;-0	721359367;0	885433523;12	3465669;6.66133814775094e-16 .;1 x 40;6 q22;"gap junction protein alpha 1 [Source:HGNC Symbol;Acc:HGNC:4274]"
209167_at;603;209167_at;GPM6B;2	605560654;0	213546217;0	489258595;-0	410351975;0	885273196;12	33622739;6.66133814775094e-16 .;1 x 39;X p22;"glycoprotein M6B [Source:HGNC Symbol;Acc:HGNC:4461]"
201623_s_at;1030;201623_s_at;DARS;2	11943718;0	074663183;0	163508495;-0	131344931;0	885118496;12	32627002;7.7715611723761e-16 .;2 x 36;2 q21;"aspartyl-tRNA synthetase [Source:HGNC Symbol;Acc:HGNC:2678]"
201752_s_at;912;201752_s_at;ADD3;2	2574325;0	148348868;0	361658605;-0	310038082;0	884121659;12	26255785;8.88178419700125e-16 .;1 x 37;10 q25;"adducin 3 [Source:HGNC Symbol;Acc:HGNC:245]"
204379_s_at;289;204379_s_at;FGFR3;1	739576304;0	315274912;0	610954864;-0	893345555;0	88346196;12	22081637;9.99200722162641e-16 .;1 x 40;4 p16;"fibroblast growth factor receptor 3 [Source:HGNC Symbol;Acc:HGNC:3690]"
221588_x_at;711;221588_x_at;ALDH6A1;1	907691521;0	204184234;0	457160426;-0	4370597;0	882298702;12	14801692;1.22124532708767e-15 .;1 x 39;14 q24;"aldehyde dehydrogenase 6 family member A1 [Source:HGNC Symbol;Acc:HGNC:7179]"
223536_at;870;223536_at;PSD2;1	859118639;0	175161178;0	388552008;-0	357468666;0	879525461;11	97846911;1.99840144432528e-15 .;1 x 38;5 q31;"pleckstrin and Sec7 domain containing 2 [Source:HGNC Symbol;Acc:HGNC:19092]"
221796_at;350;221796_at;NTRK2;2	244637507;0	29531892;0	587524086;-0	644904194;0	87559462;11	7473162;3.77475828372553e-15 .;1 x 40;9 q21;"neurotrophic receptor tyrosine kinase 2 [Source:HGNC Symbol;Acc:HGNC:8032]"
227461_at;293;227461_at;STON2;1	084794183;0	361751339;0	6103414;-0	874505789;0	874920858;11	70872211;4.10782519111308e-15 .;1 x 40;14 q31;"stonin 2 [Source:HGNC Symbol;Acc:HGNC:30652]"
204963_at;490;204963_at;SSPN;1	411784763;0	213963446;0	533795866;-0	429545301;0	873740652;11	64181456;4.88498130835069e-15 .;1 x 38;12 p12;"sarcospan [Source:HGNC Symbol;Acc:HGNC:11322]"
238003_at;570;238003_at;HEPACAM;2	025161441;0	206367369;0	501350043;-0	433652611;0	873312104;11	61773572;5.32907051820075e-15 .;1 x 39;11 q24;"hepatic and glial cell adhesion molecule [Source:HGNC Symbol;Acc:HGNC:26361]"
205882_x_at;941;205882_x_at;ADD3;2	189743786;0	143194049;0	337241457;-0	298726154;0	867459731;11	29989537;1.28785870856518e-14 .;1 x 37;10 q25;"adducin 3 [Source:HGNC Symbol;Acc:HGNC:245]"
225342_at;993;225342_at;AK4;1	848908777;0	139910006;0	289003537;-0	29533053;0	867361329;11	29471921;1.31006316905768e-14 .;1 x 37;1 p31;"adenylate kinase 4 [Source:HGNC Symbol;Acc:HGNC:363]"
227082_at;945;227082_at;;1	519892394;0	177325349;0	333259955;-0	339498686;0	864959666;11	17002199;1.86517468137026e-14 .;1 x 38;3 q13;
221795_at;362;221795_at;NTRK2;2	080637022;0	270012522;0	581994592;-0	574292906;0	864144711;11	12840786;2.09832151654155e-14 .;1 x 40;9 q21;"neurotrophic receptor tyrosine kinase 2 [Source:HGNC Symbol;Acc:HGNC:8032]"
200648_s_at;690;200648_s_at;GLUL;2	425441722;0	282923487;0	463565413;-0	652499791;0	863970658;11	11956518;2.1538326677728e-14 .;1 x 40;1 q25;"glutamate-ammonia ligase [Source:HGNC Symbol;Acc:HGNC:4341]"
218062_x_at;809;218062_x_at;CDC42EP4;1	553369927;0	240261897;0	412140736;-0	465455218;0	863655644;11	1036009;2.24265050974282e-14 .;1 x 40;17 q25;"CDC42 effector protein 4 [Source:HGNC Symbol;Acc:HGNC:17147]"
226228_at;851;226228_at;AQP4;2	626735728;0	265961339;0	394818641;-0	800834494;0	863270622;11	08415829;2.37587727269783e-14 .;1 x 40;18 q11;"aquaporin 4 [Source:HGNC Symbol;Acc:HGNC:637]"
244403_at;373;244403_at;CRB1;0	877683026;0	262148032;0	579389076;-0	603300213;0	861683726;11	00482002;2.97539770599542e-14 .;1 x 40;1 q31;"crumbs 1	cell polarity complex component [Source:HGNC Symbol;Acc:HGNC:2343]"
226301_at;843;226301_at;SLC18B1;1	62161898;0	15718236;0	398389127;-0	311798373;0	858461948;10	84756476;4.68514116391816e-14 .;1 x 38;6 q23;"solute carrier family 18 member B1 [Source:HGNC Symbol;Acc:HGNC:21573]"
224624_at;980;224624_at;LRRC8A;2	038968531;0	095054781;0	304063308;-0	146212674;0	857195904;10	78712079;5.57331958361829e-14 .;1 x 35;9 q34;"leucine rich repeat containing 8 family member A [Source:HGNC Symbol;Acc:HGNC:19027]"
202976_s_at;397;202976_s_at;RHOBTB3;1	88485072;0	232123388;0	564862167;-0	560548717;0	856815821;10	76911938;5.86197757002083e-14 .;1 x 40;5 q15;"Rho related BTB domain containing 3 [Source:HGNC Symbol;Acc:HGNC:18757]"
200947_s_at;949;200947_s_at;GLUD1;2	280702165;0	146670476;0	330243546;-0	291702848;0	85540065;10	70267156;7.105427357601e-14 .;1 x 38;10 q23;"glutamate dehydrogenase 1 [Source:HGNC Symbol;Acc:HGNC:4335]"
223605_at;559;223605_at;SLC25A18;1	746776734;0	31126944;0	505037364;-0	819660657;0	854113;10	64298819;8.44879721739744e-14 .;1 x 40;22 q11;"solute carrier family 25 member 18 [Source:HGNC Symbol;Acc:HGNC:10988]"
200907_s_at;961;200907_s_at;PALLD;1	353173818;0	177759147;0	323053198;-0	30235953;0	853434299;10	6118222;9.24815779512755e-14 .;2 x 39;4 q32;"palladin	cytoskeletal associated protein [Source:HGNC Symbol;Acc:HGNC:17068]"
213156_at;808;213156_at;;1	725156912;0	177862698;0	412357359;-0	307544531;0	853038146;10	59372287;9.74775815620887e-14 .;1 x 38;3 q13;
208622_s_at;746;208622_s_at;EZR;1	146727804;0	339599745;0	442885179;-1	029307394;0	85287014;10	58606736;9.96980276113391e-14 .;1 x 40;6 q25;"ezrin [Source:HGNC Symbol;Acc:HGNC:12691]"
226360_at;816;226360_at;ZNRF3;1	576009157;0	185086716;0	409708874;-0	470407187;0	852145057;10	55316556;1.09690034832965e-13 .;2 x 39;22 q12;"zinc and ring finger 3 [Source:HGNC Symbol;Acc:HGNC:18126]"
202935_s_at;192;202935_s_at;SOX9;1	629995681;0	358378607;0	665859703;-0	942537452;0	85166436;10	5314757;1.16795462190566e-13 .;1 x 40;17 q24;"SRY-box 9 [Source:HGNC Symbol;Acc:HGNC:11204]"
218298_s_at;1015;218298_s_at;C14orf159;1	608796628;0	103685219;0	252977237;-0	236274542;0	851495271;10	52386915;1.19459997449667e-13 .;1 x 36;14 q32;"chromosome 14 open reading frame 159 [Source:HGNC Symbol;Acc:HGNC:20498]"
217853_at;869;217853_at;TNS3;1	940493768;0	200009702;0	389176112;-0	380633638;0	851021866;10	50263626;1.2712053631958e-13 .;1 x 39;7 p12;"tensin 3 [Source:HGNC Symbol;Acc:HGNC:21616]"
213721_at;841;213721_at;SOX2;1	546352643;0	20479728;0	39955588;-0	470508305;0	85051272;10	47990391;1.35891298214119e-13 .;2 x 40;3 q26;"SRY-box 2 [Source:HGNC Symbol;Acc:HGNC:11195]"
218502_s_at;703;218502_s_at;TRPS1;1	491690188;0	175175282;0	460035147;-0	352480215;0	848513997;10	39168639;1.75970349403087e-13 .;1 x 38;8 q23;"transcriptional repressor GATA binding 1 [Source:HGNC Symbol;Acc:HGNC:12340]"
225575_at;618;225575_at;LIFR;1	782531543;0	209709569;0	486568205;-0	591325152;0	84842635;10	38785463;1.7785772854495e-13 .;1 x 38;5 p13;"LIF receptor alpha [Source:HGNC Symbol;Acc:HGNC:6597]"
213629_x_at;482;213629_x_at;MT1F;1	559917995;0	257165206;0	537226874;-0	576203019;0	848328901;10	38359794;1.80189196896663e-13 .;1 x 39;16 q13;"metallothionein 1F [Source:HGNC Symbol;Acc:HGNC:7398]"
218285_s_at;560;218285_s_at;SLC9B2;1	490190713;0	197579587;0	504443287;-0	404300091;0	847846034;10	36256122;1.91624494050302e-13 .;1 x 38;4 q24;"solute carrier family 9 member B2 [Source:HGNC Symbol;Acc:HGNC:25143]"
225627_s_at;956;225627_s_at;CACHD1;1	530378737;0	186167605;0	325306572;-0	701955621;0	847735975;10	35777918;1.94400051611865e-13 .;1 x 39;1 p31;"cache domain containing 1 [Source:HGNC Symbol;Acc:HGNC:29314]"
205328_at;239;205328_at;CLDN10;1	508710536;0	423430242;0	633747898;-1	188441387;0	847568355;10	3505053;1.98507876802978e-13 .;1 x 40;13 q32;"claudin 10 [Source:HGNC Symbol;Acc:HGNC:2033]"
203845_at;943;203845_at;KAT2B;1	644158629;0	181691178;0	335223495;-0	46106052;0	847540313;10	34928951;1.99285032920216e-13 .;1 x 38;3 p24;"lysine acetyltransferase 2B [Source:HGNC Symbol;Acc:HGNC:8638]"
226110_at;940;226110_at;PTAR1;1	727090256;0	144184179;0	338664863;-0	288610631;0	845428885;10	258619;2.60236276972137e-13 .;1 x 38;9 q21;"protein prenyltransferase alpha subunit repeat containing 1 [Source:HGNC Symbol;Acc:HGNC:30449]"
223062_s_at;986;223062_s_at;PSAT1;2	141773566;0	182616605;0	298137473;-0	41609844;0	844808456;10	2322992;2.81330514440015e-13 .;2 x 40;9 q21;"phosphoserine aminotransferase 1 [Source:HGNC Symbol;Acc:HGNC:19129]"
226932_at;53;226932_at;SSPN;0	872315598;0	307495413;0	809464412;-0	640047939;0	844538812;10	22090538;2.90989454754254e-13 .;1 x 40;12 p12;"sarcospan [Source:HGNC Symbol;Acc:HGNC:11322]"
212412_at;944;212412_at;PDLIM5;1	75179435;0	1872079;0	333415253;-0	40991239;0	843820895;10	19070172;3.1818991885757e-13 .;1 x 40;4 q22;"PDZ and LIM domain 5 [Source:HGNC Symbol;Acc:HGNC:17468]"
202936_s_at;442;202936_s_at;SOX9;1	426014523;0	301888366;0	549258245;-0	725726709;0	843636286;10	18296578;3.25517390820096e-13 .;1 x 40;17 q24;"SRY-box 9 [Source:HGNC Symbol;Acc:HGNC:11204]"
204290_s_at;861;204290_s_at;ALDH6A1;1	79479178;0	205929699;0	39178014;-0	525002211;0	843585212;10	18082776;3.27737836869346e-13 .;1 x 40;14 q24;"aldehyde dehydrogenase 6 family member A1 [Source:HGNC Symbol;Acc:HGNC:7179]"
223582_at;303;223582_at;ADGRV1;1	23613627;0	349706779;0	605869638;-1	145618803;0	84282815;10	14924827;3.59823282281013e-13 .;1 x 40;5 q14;"adhesion G protein-coupled receptor V1 [Source:HGNC Symbol;Acc:HGNC:17416]"
208949_s_at;601;208949_s_at;LGALS3;1	784673316;0	177997124;0	49006388;-0	327317913;0	842304977;10	12754675;3.83693077310454e-13 .;1 x 38;14 q22;"galectin 3 [Source:HGNC Symbol;Acc:HGNC:6563]"
225511_at;592;225511_at;GPRC5B;1	702782817;0	261023645;0	493992262;-0	561659663;0	841045906;10	07572206;4.47641923528863e-13 .;1 x 40;16 p12;"G protein-coupled receptor class C group 5 member B [Source:HGNC Symbol;Acc:HGNC:13308]"
221589_s_at;955;221589_s_at;ALDH6A1;1	928189914;0	178189287;0	32625352;-0	435223184;0	840584921;10	05688795;4.73399097700167e-13 .;1 x 39;14 q24;"aldehyde dehydrogenase 6 family member A1 [Source:HGNC Symbol;Acc:HGNC:7179]"
202686_s_at;605;202686_s_at;AXL;1	253944656;0	232225825;0	489020902;-0	361088879;0	839652262;10	01901022;5.3002047195605e-13 .;1 x 40;19 q13;"AXL receptor tyrosine kinase [Source:HGNC Symbol;Acc:HGNC:905]"
202800_at;599;202800_at;SLC1A3;2	655579113;0	315210076;0	492328159;-0	745289149;0	839393905;10	00857098;5.46895861930352e-13 .;1 x 40;5 p13;"solute carrier family 1 member 3 [Source:HGNC Symbol;Acc:HGNC:10941]"
215001_s_at;923;215001_s_at;GLUL;2	9242345;0	202265893;0	356218634;-0	460665338;0	838314596;9	965207536;6.22391027604863e-13 .;1 x 40;1 q25;"glutamate-ammonia ligase [Source:HGNC Symbol;Acc:HGNC:4341]"
203908_at;769;203908_at;SLC4A4;2	038305324;0	28517913;0	430517674;-0	736359467;0	83749062;9	932368305;6.86783963033122e-13 .;1 x 40;4 q13;"solute carrier family 4 member 4 [Source:HGNC Symbol;Acc:HGNC:11030]"
1553126_a_at;213;1553126_a_at;SLC39A12;1	328629839;0	469660086;0	654683633;-1	257606362;0	836477613;9	89230595;7.74269537373584e-13 .;1 x 40;10 p12;"solute carrier family 39 member 12 [Source:HGNC Symbol;Acc:HGNC:20860]"
218901_at;305;218901_at;PLSCR4;1	282297709;0	298405749;0	604989375;-0	598751118;0	835376347;9	849136066;8.81517081552374e-13 .;1 x 40;3 q24;"phospholipid scramblase 4 [Source:HGNC Symbol;Acc:HGNC:16497]"
207547_s_at;581;207547_s_at;FAM107A;2	208224961;0	220136574;0	497898315;-0	465399501;0	835135966;9	839765502;9.06608121908903e-13 .;1 x 40;3 p14;"family with sequence similarity 107 member A [Source:HGNC Symbol;Acc:HGNC:30827]"
209074_s_at;522;209074_s_at;FAM107A;2	374129824;0	234188636;0	521465536;-0	54625294;0	83434327;9	808996183;9.94537785459215e-13 .;1 x 39;3 p14;"family with sequence similarity 107 member A [Source:HGNC Symbol;Acc:HGNC:30827]"
214680_at;113;214680_at;NTRK2;1	264336292;0	399732523;0	723505854;-1	17152088;0	834264164;9	805936622;1.0037526365636e-12 .;1 x 40;9 q21;"neurotrophic receptor tyrosine kinase 2 [Source:HGNC Symbol;Acc:HGNC:8032]"
201885_s_at;1017;201885_s_at;CYB5R3;2	106997063;0	090739082;0	246731226;-0	262734094;0	831645912;9	70578146;1.35780275911657e-12 .;2 x 36;22 q13;"cytochrome b5 reductase 3 [Source:HGNC Symbol;Acc:HGNC:2873]"
232424_at;170;232424_at;PRDM16;0	653838297;0	397045849;0	67885371;-0	653838297;0	831596647;9	703917313;1.36546329798648e-12 .;1 x 40;1 p36;"PR/SET domain 16 [Source:HGNC Symbol;Acc:HGNC:14000]"
204422_s_at;312;204422_s_at;FGF2;1	039428336;0	293562449;0	602775459;-0	608876603;0	831544075;9	701928884;1.37367894836871e-12 .;1 x 40;4 q28;"fibroblast growth factor 2 [Source:HGNC Symbol;Acc:HGNC:3676]"
225684_at;1028;225684_at;SKA2;1	710594425;0	089169737;0	21352348;-0	129261513;0	829575229;9	628063035;1.71795910830497e-12 .;2 x 36;17 q22;"spindle and kinetochore associated complex subunit 2 [Source:HGNC Symbol;Acc:HGNC:28006]"
223843_at;371;223843_at;SCARA3;0	617566691;0	33626895;0	579500735;-0	606775662;0	829087314;9	609937117;1.81510362295967e-12 .;1 x 40;8 p21;"scavenger receptor class A member 3 [Source:HGNC Symbol;Acc:HGNC:19000]"
200845_s_at;698;200845_s_at;PRDX6;2	039573305;0	160357606;0	461352193;-0	314402891;0	82712778;9	537843388;2.25974794432204e-12 .;1 x 38;1 q25;"peroxiredoxin 6 [Source:HGNC Symbol;Acc:HGNC:16753]"
242579_at;153;242579_at;BMPR1B;0	902490325;0	398505055;0	691676012;-0	902209697;0	826176419;9	503240682;2.51088039249225e-12 .;1 x 40;4 q22;"bone morphogenetic protein receptor type 1B [Source:HGNC Symbol;Acc:HGNC:1077]"
209170_s_at;962;209170_s_at;GPM6B;2	976193225;0	176507308;0	322131346;-0	409784681;0	825803255;9	489738155;2.61635157983164e-12 .;1 x 38;X p22;"glycoprotein M6B [Source:HGNC Symbol;Acc:HGNC:4461]"
212850_s_at;1003;212850_s_at;LRP4;1	682152725;0	222248771;0	276628618;-0	559187431;0	825340194;9	473037265;2.75313105646546e-12 .;1 x 40;11 p11;"LDL receptor related protein 4 [Source:HGNC Symbol;Acc:HGNC:6696]"
202003_s_at;758;202003_s_at;;1	209683801;0	265035739;0	436233426;-0	66057233;0	824668153;9	448905771;2.96362934193439e-12 .;1 x 40;X p11;
201349_at;414;201349_at;SLC9A3R1;0	884572069;0	363275471;0	5577271;-0	865328379;0	823241993;9	398108523;3.46167539078124e-12 .;1 x 40;17 q25;"SLC9A3 regulator 1 [Source:HGNC Symbol;Acc:HGNC:11075]"
208623_s_at;901;208623_s_at;EZR;1	637103087;0	251173756;0	3686712;-0	653683639;0	823162668;9	395299412;3.49154039014365e-12 .;1 x 40;6 q25;"ezrin [Source:HGNC Symbol;Acc:HGNC:12691]"
203296_s_at;852;203296_s_at;ATP1A2;2	820782468;0	182939212;0	393451064;-0	387282443;0	821316496;9	330399741;4.26003676778919e-12 .;1 x 40;1 q23;"ATPase Na+/K+ transporting subunit alpha 2 [Source:HGNC Symbol;Acc:HGNC:800]"
214279_s_at;257;214279_s_at;NDRG2;1	913651628;0	37060078;0	626771495;-0	933797442;0	820610463;9	305819475;4.59399185359644e-12 .;1 x 40;14 q11;"NDRG family member 2 [Source:HGNC Symbol;Acc:HGNC:14460]"
201360_at;868;201360_at;CST3;2	710042452;0	253262176;0	39016201;-0	634838661;0	819641939;9	272312703;5.09237096935067e-12 .;1 x 40;20 p11;"cystatin C [Source:HGNC Symbol;Acc:HGNC:2475]"
203120_at;755;203120_at;TP53BP2;1	545127353;0	24587112;0	437462927;-0	558917678;0	819631823;9	271964012;5.09792208447379e-12 .;1 x 40;1 q41;"tumor protein p53 binding protein 2 [Source:HGNC Symbol;Acc:HGNC:12000]"
225491_at;907;225491_at;SLC1A2;3	123906613;0	210468232;0	365537857;-0	573021592;0	819461972;9	26611342;5.19051468472753e-12 .;1 x 40;11 p13;"solute carrier family 1 member 2 [Source:HGNC Symbol;Acc:HGNC:10940]"
224970_at;877;224970_at;NFIA;1	595313294;0	166733735;0	381892969;-0	379214342;0	819444869;9	265524709;5.19984055813438e-12 .;1 x 38;1 p31;"nuclear factor I A [Source:HGNC Symbol;Acc:HGNC:7784]"
224156_x_at;388;224156_x_at;IL17RB;1	017555778;0	282366257;0	568782482;-0	768444297;0	818958692;9	248821228;5.47428768982172e-12 .;1 x 40;3 p21;"interleukin 17 receptor B [Source:HGNC Symbol;Acc:HGNC:18015]"
212811_x_at;1016;212811_x_at;SLC1A4;1	78173001;0	129724692;0	247881596;-0	305583684;0	818266024;9	225127734;5.88873394491429e-12 .;1 x 37;2 p14;"solute carrier family 1 member 4 [Source:HGNC Symbol;Acc:HGNC:10942]"
202377_at;651;202377_at;LEPROT;1	367633951;0	188225565;0	47554663;-0	340447342;0	817420999;9	196387271;6.43440856151756e-12 .;1 x 37;1 p31;"leptin receptor overlapping transcript [Source:HGNC Symbol;Acc:HGNC:29477]"
226614_s_at;678;226614_s_at;FAM167A;1	167445612;0	332270636;0	467465525;-0	768682047;0	81651732;9	165849836;7.07056635462777e-12 .;1 x 40;8 p23;"family with sequence similarity 167 member A [Source:HGNC Symbol;Acc:HGNC:15549]"
223673_at;196;223673_at;RFX4;1	278177633;0	422997251;0	66170683;-1	192073405;0	816299447;9	158517715;7.23254789392058e-12 .;1 x 40;12 q23;"regulatory factor X4 [Source:HGNC Symbol;Acc:HGNC:9985]"
207174_at;367;207174_at;GPC5;1	173864943;0	382335835;0	580800678;-1	07548593;0	815240163;9	12303584;8.07121036672243e-12 .;1 x 40;13 q31;"glypican 5 [Source:HGNC Symbol;Acc:HGNC:4453]"
213656_s_at;619;213656_s_at;KLC1;1	481021206;0	151645844;0	486268929;-0	277466547;0	814245003;9	089950688;8.94173624033101e-12 .;1 x 36;14 q32;"kinesin light chain 1 [Source:HGNC Symbol;Acc:HGNC:6387]"
205646_s_at;705;205646_s_at;PAX6;1	327813259;0	244594044;0	458382723;-0	700933034;0	814186167;9	08800209;8.99591512393272e-12 .;1 x 40;11 p13;"paired box 6 [Source:HGNC Symbol;Acc:HGNC:8620]"
222651_s_at;829;222651_s_at;TRPS1;1	381017822;0	182011706;0	404162905;-0	395643046;0	814024618;9	08265602;9.14623932146696e-12 .;1 x 38;8 q23;"transcriptional repressor GATA binding 1 [Source:HGNC Symbol;Acc:HGNC:12340]"
212259_s_at;359;212259_s_at;PBXIP1;0	919471995;0	340180346;0	584236784;-0	785505058;0	813100768;9	052203062;1.00519592649562e-11 .;1 x 40;1 q21;"PBX homeobox interacting protein 1 [Source:HGNC Symbol;Acc:HGNC:21199]"
217202_s_at;565;217202_s_at;GLUL;2	225651061;0	336011735;0	502300957;-0	918602529;0	812891601;9	04533637;1.02684527547581e-11 .;1 x 40;1 q25;"glutamate-ammonia ligase [Source:HGNC Symbol;Acc:HGNC:4341]"
216048_s_at;154;216048_s_at;RHOBTB3;0	799503049;0	338192284;0	691535554;-0	775555997;0	812808653;9	042616143;1.03554942398887e-11 .;1 x 40;5 q15;"Rho related BTB domain containing 3 [Source:HGNC Symbol;Acc:HGNC:18757]"
212859_x_at;416;212859_x_at;MT1E;2	060887393;0	248872466;0	557487432;-0	556094128;0	812012857;9	016600757;1.1226686247312e-11 .;1 x 39;16 q13;"metallothionein 1E [Source:HGNC Symbol;Acc:HGNC:7397]"
204363_at;882;204363_at;F3;1	793422269;0	267870669;0	377589263;-0	765668726;0	811179754;8	989523878;1.22124532708767e-11 .;1 x 40;1 p21;"coagulation factor III	tissue factor [Source:HGNC Symbol;Acc:HGNC:3541]"
204284_at;579;204284_at;PPP1R3C;1	809440007;0	239774013;0	500193637;-0	500511531;0	810956256;8	982287246;1.24904531162429e-11 .;1 x 40;10 q23;"protein phosphatase 1 regulatory subunit 3C [Source:HGNC Symbol;Acc:HGNC:9293]"
205363_at;187;205363_at;BBOX1;0	906601363;0	413808928;0	66779242;-0	887400364;0	810937172;8	98166983;1.25144339335748e-11 .;1 x 40;11 p14;"gamma-butyrobetaine hydroxylase 1 [Source:HGNC Symbol;Acc:HGNC:964]"
213388_at;897;213388_at;PDE4DIP;1	629567592;0	11706208;0	370451756;-0	251085106;0	810933363;8	981546636;1.25193189148831e-11 .;1 x 36;1 q21;"phosphodiesterase 4D interacting protein [Source:HGNC Symbol;Acc:HGNC:15580]"
205150_s_at;265;205150_s_at;TRIL;1	208900571;0	358513685;0	622637627;-1	086104804;0	810860498;8	979190192;1.26113564036245e-11 .;1 x 40;7 p14;"TLR4 interactor with leucine rich repeats [Source:HGNC Symbol;Acc:HGNC:22200]"
208964_s_at;685;208964_s_at;FADS1;1	637614703;0	208061103;0	464483036;-0	561216748;0	810430913;8	965322285;1.31674671166593e-11 .;2 x 40;11 q12;"fatty acid desaturase 1 [Source:HGNC Symbol;Acc:HGNC:3574]"
212230_at;701;212230_at;PLPP3;1	843061225;0	292133839;0	460404539;-0	697012023;0	810323339;8	961856184;1.33103528199285e-11 .;1 x 40;1 p32;"phospholipid phosphatase 3 [Source:HGNC Symbol;Acc:HGNC:9229]"
203638_s_at;491;203638_s_at;FGFR2;1	886294005;0	285086293;0	533792728;-0	812698082;0	809854707;8	94678725;1.39498412821126e-11 .;1 x 40;10 q26;"fibroblast growth factor receptor 2 [Source:HGNC Symbol;Acc:HGNC:3689]"
213249_at;663;213249_at;FBXL7;1	073001164;0	21287277;0	471166006;-0	427179115;0	809184452;8	925321559;1.49148471351168e-11 .;1 x 40;5 p15;"F-box and leucine rich repeat protein 7 [Source:HGNC Symbol;Acc:HGNC:13604]"
207443_at;903;207443_at;NR2E1;1	331605218;0	242975312;0	367818858;-0	527011643;0	808611675;8	907057719;1.57889257224042e-11 .;1 x 40;6 q21;"nuclear receptor subfamily 2 group E member 1 [Source:HGNC Symbol;Acc:HGNC:7973]"
208962_s_at;920;208962_s_at;FADS1;1	843487973;0	141190088;0	35702578;-0	388293795;0	807181011;8	861757353;1.81876735894093e-11 .;1 x 37;11 q12;"fatty acid desaturase 1 [Source:HGNC Symbol;Acc:HGNC:3574]"
203903_s_at;199;203903_s_at;HEPH;0	939029267;0	411750508;0	660952035;-0	890813831;0	806767083;8	848734734;1.89430693353643e-11 .;1 x 40;X q12;"hephaestin [Source:HGNC Symbol;Acc:HGNC:4866]"
205384_at;361;205384_at;;1	49786854;0	242720164;0	583465688;-0	456194984;0	805920604;8	822219557;2.05810923858962e-11 .;1 x 39;19 q13;
208951_at;981;208951_at;ALDH7A1;1	520101505;0	147113561;0	30385074;-0	351409205;0	8048575;8	789137293;2.28272956093178e-11 .;1 x 37;5 q23;"aldehyde dehydrogenase 7 family member A1 [Source:HGNC Symbol;Acc:HGNC:877]"
225424_at;398;225424_at;GPAM;1	021158292;0	374565725;0	564646526;-0	806707627;0	804422006;8	77565492;2.38125075213702e-11 .;1 x 40;10 q25;"glycerol-3-phosphate acyltransferase	mitochondrial [Source:HGNC Symbol;Acc:HGNC:24865]"
200946_x_at;991;200946_x_at;GLUD1;2	055222434;0	16147658;0	289464538;-0	340288455;0	803651659;8	751903907;2.56537013854086e-11 .;1 x 39;10 q23;"glutamate dehydrogenase 1 [Source:HGNC Symbol;Acc:HGNC:4335]"
210357_s_at;629;210357_s_at;SMOX;1	115491595;0	208522761;0	482554821;-0	325239982;0	803555928;8	74896106;2.58916221795857e-11 .;1 x 38;20 p13;"spermine oxidase [Source:HGNC Symbol;Acc:HGNC:15862]"
201007_at;862;201007_at;HADHB;2	05180745;0	167415027;0	391713656;-0	317610225;0	803481131;8	746663083;2.60790278261425e-11 .;1 x 38;2 p23;"hydroxyacyl-CoA dehydrogenase/3-ketoacyl-CoA thiolase/enoyl-CoA hydratase (trifunctional protein)	beta subunit [Source:HGNC Symbol;Acc:HGNC:4803]"
208389_s_at;423;208389_s_at;SLC1A2;1	887131349;0	263094967;0	554545875;-0	623349285;0	802863568;8	727734342;2.7675417513251e-11 .;1 x 40;11 p13;"solute carrier family 1 member 2 [Source:HGNC Symbol;Acc:HGNC:10940]"
202834_at;444;202834_at;AGT;2	021569897;0	28010849;0	548698274;-0	66367849;0	80248849;8	716276587;2.86894952239436e-11 .;1 x 40;1 q42;"angiotensinogen [Source:HGNC Symbol;Acc:HGNC:333]"
227197_at;432;227197_at;ARHGEF26;1	339456585;0	306770508;0	552564073;-0	679408501;0	802151439;8	706005196;2.9630298215011e-11 .;1 x 40;3 q25;"Rho guanine nucleotide exchange factor 26 [Source:HGNC Symbol;Acc:HGNC:24490]"
219255_x_at;460;219255_x_at;IL17RB;1	023309598;0	292730183;0	545208894;-0	779349344;0	802082085;8	703894603;2.98274738241844e-11 .;1 x 40;3 p21;"interleukin 17 receptor B [Source:HGNC Symbol;Acc:HGNC:18015]"
217165_x_at;467;217165_x_at;MT1F;1	763078252;0	288731939;0	541799196;-0	661667559;0	801759852;8	694101203;3.07600611648695e-11 .;1 x 40;16 q13;"metallothionein 1F [Source:HGNC Symbol;Acc:HGNC:7398]"
211596_s_at;842;211596_s_at;LRIG1;1	912084698;0	219964454;0	399351645;-0	544019801;0	798069534;8	583436766;4.35884661698083e-11 .;1 x 40;3 p14;"leucine rich repeats and immunoglobulin like domains 1 [Source:HGNC Symbol;Acc:HGNC:17360]"
212076_at;914;212076_at;KMT2A;1	417959297;0	142913719;0	36020374;-0	156193828;0	79788994;8	578120005;4.43260983473692e-11 .;1 x 35;11 q23;"lysine methyltransferase 2A [Source:HGNC Symbol;Acc:HGNC:7132]"
206465_at;395;206465_at;ACSBG1;1	414270022;0	441047674;0	56546357;-1	290344999;0	797195016;8	557606372;4.72923922245627e-11 .;1 x 40;15 q25;"acyl-CoA synthetase bubblegum family member 1 [Source:HGNC Symbol;Acc:HGNC:29567]"
210524_x_at;393;210524_x_at;MT1F;1	431345645;0	276360373;0	56722194;-0	642706637;0	796872332;8	548112747;4.87323514875015e-11 .;1 x 39;16 q13;"metallothionein 1F [Source:HGNC Symbol;Acc:HGNC:7398]"
224704_at;977;224704_at;TNRC6A;1	631573552;0	11476127;0	307814598;-0	276822303;0	796651703;8	541633184;4.97404339938612e-11 .;2 x 36;16 p12;"trinucleotide repeat containing 6A [Source:HGNC Symbol;Acc:HGNC:11969]"
203295_s_at;631;203295_s_at;ATP1A2;2	346394179;0	21207708;0	480175467;-0	42491349;0	796174503;8	527650478;5.19884135741222e-11 .;1 x 40;1 q23;"ATPase Na+/K+ transporting subunit alpha 2 [Source:HGNC Symbol;Acc:HGNC:800]"
229645_at;452;229645_at;FAM69C;1	001362728;0	28467164;0	547492304;-0	735997171;0	795727465;8	514590994;5.41807709808495e-11 .;1 x 40;18 q22;"family with sequence similarity 69 member C [Source:HGNC Symbol;Acc:HGNC:31729]"
208920_at;963;208920_at;SRI;2	111803211;0	123787845;0	321696815;-0	220785579;0	794802053;8	487676943;5.89981397070005e-11 .;1 x 38;7 q21;"sorcin [Source:HGNC Symbol;Acc:HGNC:11292]"
242281_at;232;242281_at;GLUL;1	303433017;0	317309351;0	640417998;-0	786425651;0	794745937;8	486050079;5.93028959272601e-11 .;1 x 40;1 q25;"glutamate-ammonia ligase [Source:HGNC Symbol;Acc:HGNC:4341]"
224996_at;667;224996_at;ASPH;1	055305897;0	164949613;0	47022646;-0	220051705;0	794329179;8	47398636;6.16126039076903e-11 .;1 x 33;8 q12;"aspartate beta-hydroxylase [Source:HGNC Symbol;Acc:HGNC:757]"
1559590_at;525;1559590_at;CHDH;0	271993174;0	203333344;0	520817512;-0	271993174;0	791088978;8	38128717;8.26803070452797e-11 .;1 x 36;3 p21;"choline dehydrogenase [Source:HGNC Symbol;Acc:HGNC:24288]"
213395_at;648;213395_at;MLC1;1	494704363;0	368334825;0	476253359;-0	876833062;0	790160462;8	355073958;8.98655594383513e-11 .;1 x 40;22 q13;"megalencephalic leukoencephalopathy with subcortical cysts 1 [Source:HGNC Symbol;Acc:HGNC:17082]"
201876_at;761;201876_at;PON2;2	316217197;0	231733223;0	435295488;-0	553738306;0	78887905;8	319149212;1.00749630860264e-10 .;1 x 40;7 q21;"paraoxonase 2 [Source:HGNC Symbol;Acc:HGNC:9205]"
205151_s_at;338;205151_s_at;TRIL;1	310512196;0	274172994;0	591994791;-0	889291469;0	787699911;8	28634564;1.11848530437442e-10 .;1 x 40;7 p14;"TLR4 interactor with leucine rich repeats [Source:HGNC Symbol;Acc:HGNC:22200]"
202619_s_at;509;202619_s_at;PLOD2;0	886287602;0	18469822;0	525573791;-0	312941314;0	787337589;8	276314217;1.15483400620064e-10 .;1 x 37;3 q24;"procollagen-lysine	2-oxoglutarate 5-dioxygenase 2 [Source:HGNC Symbol;Acc:HGNC:9082]"
210068_s_at;654;210068_s_at;AQP4;1	596311238;0	37465158;0	473843833;-1	214108388;0	787161454;8	271445814;1.17290177570339e-10 .;1 x 40;18 q11;"aquaporin 4 [Source:HGNC Symbol;Acc:HGNC:637]"
227626_at;692;227626_at;PAQR8;2	049905007;0	207958503;0	463204034;-0	465252831;0	786013679;8	239850887;1.29730781672777e-10 .;1 x 39;6 p12;"progestin and adipoQ receptor family member 8 [Source:HGNC Symbol;Acc:HGNC:15708]"
209292_at;214;209292_at;;1	481606292;0	361249917;0	654282728;-0	799823444;0	784780415;8	206151126;1.44473877305984e-10 .;1 x 40; ;
213331_s_at;965;213331_s_at;NEK1;1	338772608;0	125956963;0	3208995;-0	212296761;0	784289652;8	192811482;1.50767176521072e-10 .;1 x 36;4 q33;"NIMA related kinase 1 [Source:HGNC Symbol;Acc:HGNC:7744]"
206453_s_at;819;206453_s_at;NDRG2;2	455758129;0	253551813;0	40874057;-0	633087866;0	783976961;8	184332963;1.5491041782667e-10 .;1 x 40;14 q11;"NDRG family member 2 [Source:HGNC Symbol;Acc:HGNC:14460]"
235489_at;433;235489_at;RHOJ;0	898845461;0	296566086;0	552547462;-0	788554725;0	783424867;8	169402492;1.62488023036644e-10 .;1 x 40;14 q23;"ras homolog family member J [Source:HGNC Symbol;Acc:HGNC:688]"
232531_at;553;232531_at;EMX2OS;1	343230748;0	28796921;0	507408917;-0	642199316;0	783259569;8	16494205;1.64823710235851e-10 .;1 x 40;10 q26;"EMX2 opposite strand/antisense RNA [Source:HGNC Symbol;Acc:HGNC:18511]"
217203_at;519;217203_at;;0	971408468;0	263978602;0	521644867;-0	818412479;0	783251793;8	164732322;1.64934288449103e-10 .;1 x 39;9 p13;"glutamate-ammonia ligase pseudogene 4 [Source:HGNC Symbol;Acc:HGNC:4345]"
203423_at;831;203423_at;RBP1;1	310500816;0	187840661;0	403380551;-0	566640797;0	782329712;8	139933764;1.78560832786445e-10 .;1 x 38;3 q23;"retinol binding protein 1 [Source:HGNC Symbol;Acc:HGNC:9919]"
209590_at;370;209590_at;BMP7;0	929576024;0	278223588;0	580380998;-0	610427984;0	781328478;8	113162593;1.94551041943214e-10 .;1 x 40;20 q13;"bone morphogenetic protein 7 [Source:HGNC Symbol;Acc:HGNC:1074]"
226134_s_at;1019;226134_s_at;MSI2;1	613016512;0	15107033;0	245707073;-0	347348927;0	781008069;8	104629489;1.9994572664217e-10 .;2 x 39;17 q22;"musashi RNA binding protein 2 [Source:HGNC Symbol;Acc:HGNC:18585]"
217546_at;83;217546_at;MT1M;1	371145784;0	330211974;0	756555971;-0	683517318;0	779602824;8	067398173;2.25308216528219e-10 .;1 x 40;16 q13;"metallothionein 1M [Source:HGNC Symbol;Acc:HGNC:14296]"
201184_s_at;902;201184_s_at;CHD4;1	467061119;0	114308608;0	36823031;-0	202981981;0	779306756;8	059593785;2.31023422614385e-10 .;1 x 34;12 p13;"chromodomain helicase DNA binding protein 4 [Source:HGNC Symbol;Acc:HGNC:1919]"
210830_s_at;598;210830_s_at;PON2;1	934166102;0	244318916;0	492452079;-0	504035853;0	779223299;8	057396325;2.32659003174263e-10 .;1 x 40;7 q21;"paraoxonase 2 [Source:HGNC Symbol;Acc:HGNC:9205]"
43427_at;333;43427_at;ACACB;0	565661923;0	242879524;0	59349912;-0	532329198;0	777964331;8	024379036;2.58688293008902e-10 .;1 x 39;12 q24;"acetyl-CoA carboxylase beta [Source:HGNC Symbol;Acc:HGNC:85]"
206461_x_at;352;206461_x_at;MT1H;1	82266114;0	313314781;0	58590244;-0	77329404;0	77686354;7	995710806;2.83663759148567e-10 .;1 x 40;16 q13;"metallothionein 1H [Source:HGNC Symbol;Acc:HGNC:7400]"
209703_x_at;879;209703_x_at;METTL7A;1	658573064;0	186597192;0	381421531;-0	504716752;0	77400476;7	922116774;3.59509533254254e-10 .;1 x 38;12 q13;"methyltransferase like 7A [Source:HGNC Symbol;Acc:HGNC:24550]"
228038_at;777;228038_at;SOX2;2	152363409;0	235564794;0	426179162;-0	508076853;0	773668204;7	913533019;3.69595909432974e-10 .;1 x 40;3 q26;"SRY-box 2 [Source:HGNC Symbol;Acc:HGNC:11195]"
222121_at;529;222121_at;ARHGEF26;0	312876979;0	239090409;0	519860688;-0	312725324;0	773399044;7	906680192;3.77853082156321e-10 .;1 x 39;3 q25;"Rho guanine nucleotide exchange factor 26 [Source:HGNC Symbol;Acc:HGNC:24490]"
225420_at;864;225420_at;GPAM;1	379082015;0	268220369;0	39082859;-0	870049984;0	772356408;7	880234745;4.1150127749745e-10 .;1 x 40;10 q25;"glycerol-3-phosphate acyltransferase	mitochondrial [Source:HGNC Symbol;Acc:HGNC:24865]"
220460_at;156;220460_at;SLCO1C1;1	479516108;0	408837318;0	690872455;-1	09174449;0	771006075;7	846219243;4.59266624730503e-10 .;1 x 40;12 p12;"solute carrier organic anion transporter family member 1C1 [Source:HGNC Symbol;Acc:HGNC:13819]"
216733_s_at;992;216733_s_at;GATM;2	065657029;0	136656036;0	28907535;-0	266228167;0	770909438;7	843794958;4.62877292051189e-10 .;1 x 37;15 q21;"glycine amidinotransferase [Source:HGNC Symbol;Acc:HGNC:4175]"
201656_at;936;201656_at;ITGA6;1	119290551;0	1486111;0	342504736;-0	254793509;0	770140971;7	824564271;4.92551111008765e-10 .;1 x 36;2 q31;"integrin subunit alpha 6 [Source:HGNC Symbol;Acc:HGNC:6142]"
204964_s_at;59;204964_s_at;SSPN;0	545962176;0	355688198;0	799627116;-0	531812295;0	768653976;7	78758976;5.55105961197455e-10 .;1 x 40;12 p12;"sarcospan [Source:HGNC Symbol;Acc:HGNC:11322]"
210138_at;732;210138_at;RGS20;1	364555278;0	272970097;0	448121689;-0	966319616;0	767972213;7	770741014;5.86211745812193e-10 .;1 x 40;8 q11;"regulator of G protein signaling 20 [Source:HGNC Symbol;Acc:HGNC:14600]"
209605_at;141;209605_at;TST;0	858290856;0	295082792;0	702466948;-0	793537617;0	767262542;7	753270957;6.20322571087684e-10 .;1 x 40;22 q12;"thiosulfate sulfurtransferase [Source:HGNC Symbol;Acc:HGNC:12388]"
234755_x_at;922;234755_x_at;;0	212610575;0	146099205;0	356450079;-0	207603112;0	766486023;7	73423461;6.59775123423856e-10 .;1 x 34; ;
207055_at;295;207055_at;GPR37L1;0	485901519;0	345759268;0	608574478;-0	47298354;0	766160985;7	726290778;6.76977807145818e-10 .;1 x 40;1 q32;"G protein-coupled receptor 37 like 1 [Source:HGNC Symbol;Acc:HGNC:14923]"
231015_at;292;231015_at;KLF15;1	117199038;0	25502923;0	610603438;-0	656515339;0	764655587;7	689685665;7.62281349153682e-10 .;2 x 40;3 q21;"Kruppel like factor 15 [Source:HGNC Symbol;Acc:HGNC:14536]"
216336_x_at;978;216336_x_at;;1	954461038;0	239476687;0	306508376;-0	630665774;0	764138783;7	677189248;7.93819565636511e-10 .;1 x 40; ;
202330_s_at;666;202330_s_at;UNG;1	235558956;0	164969043;0	470395431;-0	336397837;0	764135984;7	677121661;7.93993648606772e-10 .;1 x 37;12 q24;"uracil DNA glycosylase [Source:HGNC Symbol;Acc:HGNC:12572]"
211552_s_at;487;211552_s_at;ALDH4A1;0	716903669;0	275459187;0	535520331;-0	709421688;0	763444613;7	660459953;8.38109803780185e-10 .;1 x 40;1 p36;"aldehyde dehydrogenase 4 family member A1 [Source:HGNC Symbol;Acc:HGNC:406]"
231994_at;390;231994_at;CHDH;0	813985789;0	199586833;0	568283105;-0	669099068;0	762119323;7	628697218;9.29173404884409e-10 .;1 x 37;3 p21;"choline dehydrogenase [Source:HGNC Symbol;Acc:HGNC:24288]"
209291_at;814;209291_at;ID4;1	871217212;0	235614147;0	41032181;-0	4537614;0	762089832;7	627993032;9.31301480378011e-10 .;2 x 40;6 p22;"inhibitor of DNA binding 4	HLH protein [Source:HGNC Symbol;Acc:HGNC:5363]"
229926_at;1029;229926_at;MIR3682;1	517397057;0	12417082;0	17633209;-0	336113559;0	758286374;7	538110938;1.24752141950069e-09 .;1 x 37;2 p16;"microRNA 3682 [Source:HGNC Symbol;Acc:HGNC:38916]"
202887_s_at;23;202887_s_at;DDIT4;1	370436134;0	37951318;0	887361005;-0	719446589;0	758079717;7	533279818;1.26730115290741e-09 .;1 x 40;10 q22;"DNA damage inducible transcript 4 [Source:HGNC Symbol;Acc:HGNC:24944]"
236360_at;48;236360_at;LINC00982;0	496196566;0	375734086;0	819064188;-0	496196566;0	757828894;7	527423361;1.29170296681025e-09 .;1 x 40;1 p36;"long intergenic non-protein coding RNA 982 [Source:HGNC Symbol;Acc:HGNC:48664]"
58780_s_at;742;58780_s_at;ARHGEF40;1	015687088;0	219580213;0	444276212;-0	655606939;0	757623665;7	522637331;1.31199573427665e-09 .;2 x 40;14 q11;"Rho guanine nucleotide exchange factor 40 [Source:HGNC Symbol;Acc:HGNC:25516]"
214203_s_at;37;214203_s_at;PRODH;0	686273512;0	427533437;0	83606217;-0	686273512;0	756660259;7	500240002;1.41131306641284e-09 .;1 x 40;22 q11;"proline dehydrogenase 1 [Source:HGNC Symbol;Acc:HGNC:9453]"
221950_at;402;221950_at;EMX2;1	158381841;0	424390709;0	563358931;-1	04500215;0	756163309;7	488731641;1.46525613864412e-09 .;1 x 40;10 q26;"empty spiracles homeobox 2 [Source:HGNC Symbol;Acc:HGNC:3341]"
203790_s_at;1001;203790_s_at;RIDA;1	640622019;0	140485195;0	282009522;-0	293539324;0	754881584;7	459188753;1.61343605142861e-09 .;1 x 37;8 q22;"reactive intermediate imine deaminase A homolog [Source:HGNC Symbol;Acc:HGNC:16897]"
226527_at;1023;226527_at;RPRD2;1	563573205;0	099851109;0	225540313;-0	164999321;0	753014819;7	416515791;1.85453341572384e-09 .;2 x 34;1 q21;"regulation of nuclear pre-mRNA domain containing 2 [Source:HGNC Symbol;Acc:HGNC:29039]"
214433_s_at;174;214433_s_at;SELENBP1;0	899963221;0	314997761;0	676097676;-0	786438587;0	753002747;7	416241203;1.85619697390393e-09 .;1 x 40;1 q21;"selenium binding protein 1 [Source:HGNC Symbol;Acc:HGNC:10719]"
202443_x_at;848;202443_x_at;NOTCH2;1	600879272;0	214186894;0	396335742;-0	433474444;0	752828802;7	412286359;1.88032300840746e-09 .;2 x 40;1 p12;"notch 2 [Source:HGNC Symbol;Acc:HGNC:7882]"
227506_at;166;227506_at;SLC16A9;0	57324046;0	394784838;0	680743002;-0	573238451;0	752187383;7	397733957;1.97184912842374e-09 .;1 x 40;10 q21;"solute carrier family 16 member 9 [Source:HGNC Symbol;Acc:HGNC:23520]"
209960_at;219;209960_at;HGF;0	472330189;0	345170002;0	651544113;-0	46788057;0	752172129;7	397388454;1.97407579172193e-09 .;1 x 40;7 q21;"hepatocyte growth factor [Source:HGNC Symbol;Acc:HGNC:4893]"
212884_x_at;844;212884_x_at;APOE;2	107585754;0	246767841;0	398141864;-0	583135378;0	751542112;7	383142997;2.06812256209332e-09 .;1 x 40;19 q13;"apolipoprotein E [Source:HGNC Symbol;Acc:HGNC:613]"
203556_at;556;203556_at;ZHX2;1	333925207;0	218606241;0	505461089;-0	54837596;0	747779375;7	299019489;2.72310018978317e-09 .;1 x 38;8 q24;"zinc fingers and homeoboxes 2 [Source:HGNC Symbol;Acc:HGNC:18513]"
210906_x_at;680;210906_x_at;AQP4;1	560756423;0	390100903;0	466772701;-1	09798296;0	747266122;7	287669682;2.82618706215487e-09 .;1 x 40;18 q11;"aquaporin 4 [Source:HGNC Symbol;Acc:HGNC:637]"
217055_x_at;365;217055_x_at;;0	522903797;0	278691813;0	581063907;-0	515032181;0	746214608;7	264509123;3.04889535840402e-09 .;1 x 40; ;
236575_at;696;236575_at;ARHGEF26-AS1;1	322741935;0	248130073;0	462135715;-0	694178112;0	744718241;7	23176149;3.39426908801954e-09 .;1 x 40;3 q25;"ARHGEF26 antisense RNA 1 [Source:HGNC Symbol;Acc:HGNC:41048]"
204642_at;405;204642_at;S1PR1;1	123976664;0	370144962;0	562641505;-1	051184734;0	741703041;7	166514816;4.20425627645216e-09 .;1 x 40;1 p21;"sphingosine-1-phosphate receptor 1 [Source:HGNC Symbol;Acc:HGNC:3165]"
205208_at;339;205208_at;ALDH1L1;1	127870342;0	304772614;0	591772284;-0	797609983;0	741470911;7	161532095;4.27357915722126e-09 .;1 x 40;3 q21;"aldehyde dehydrogenase 1 family member L1 [Source:HGNC Symbol;Acc:HGNC:3978]"
229281_at;486;229281_at;NPAS3;1	417330283;0	268435019;0	535599102;-0	429716571;0	740296211;7	136404227;4.6410904008809e-09 .;2 x 40;14 q13;"neuronal PAS domain protein 3 [Source:HGNC Symbol;Acc:HGNC:19311]"
1558010_s_at;661;1558010_s_at;SLC1A2;2	227423322;0	298173981;0	471447469;-0	79488498;0	740229756;7	134987022;4.6627404159949e-09 .;1 x 40;11 p13;"solute carrier family 1 member 2 [Source:HGNC Symbol;Acc:HGNC:10940]"
202119_s_at;1021;202119_s_at;CPNE3;1	644287182;0	104443069;0	236011462;-0	204913048;0	739300239;7	11521286;4.97563279466817e-09 .;1 x 36;8 q21;"copine 3 [Source:HGNC Symbol;Acc:HGNC:2316]"
212377_s_at;798;212377_s_at;NOTCH2;1	467490634;0	269395873;0	415927485;-0	618823269;0	739039229;7	109676398;5.0669624052091e-09 .;1 x 40;1 p12;"notch 2 [Source:HGNC Symbol;Acc:HGNC:7882]"
1552661_at;227;1552661_at;PCDHGB7;0	095914715;0	156034098;0	644124239;-0	095914715;0	738830835;7	105261074;5.14100428894437e-09 .;1 x 33;5 q31;"protocadherin gamma subfamily B	7 [Source:HGNC Symbol;Acc:HGNC:8714]"
214721_x_at;791;214721_x_at;CDC42EP4;1	510982307;0	272552909;0	417331253;-0	761113598;0	738761967;7	103802934;5.16569453878901e-09 .;1 x 40;17 q25;"CDC42 effector protein 4 [Source:HGNC Symbol;Acc:HGNC:17147]"
242407_at;407;242407_at;;1	109402144;0	167855977;0	560625848;-0	273560514;0	738697797;7	102444715;5.1888000562883e-09 .;2 x 35; ;
205125_at;898;205125_at;PLCD1;1	25067559;0	178195693;0	370144551;-0	274297702;0	738459277;7	097399892;5.27553400964109e-09 .;1 x 38;3 p22;"phospholipase C delta 1 [Source:HGNC Symbol;Acc:HGNC:9060]"
233296_x_at;1026;233296_x_at;;1	588781734;0	105214418;0	220651854;-0	19998328;0	738442187;7	097038644;5.28180055248129e-09 .;2 x 36; ;
230720_at;298;230720_at;RNF182;1	281444022;0	354290119;0	607187485;-0	735702302;0	73566062;7	038641006;6.3998258914566e-09 .;1 x 40;6 p23;"ring finger protein 182 [Source:HGNC Symbol;Acc:HGNC:28522]"
238178_at;264;238178_at;;0	409404103;0	303523744;0	62300453;-0	409404103;0	735497657;7	035243952;6.47174469570189e-09 .;1 x 40; ;
227095_at;789;227095_at;LEPROT;1	157527067;0	169030913;0	417950264;-0	281853852;0	734845993;7	021686158;6.76695854906484e-09 .;1 x 36;1 p31;"leptin receptor overlapping transcript [Source:HGNC Symbol;Acc:HGNC:29477]"
208430_s_at;683;208430_s_at;DTNA;0	838241054;0	289093735;0	465548908;-0	800806598;0	733989844;7	003938313;7.17396331229025e-09 .;1 x 40;18 q12;"dystrobrevin alpha [Source:HGNC Symbol;Acc:HGNC:3057]"
241744_x_at;410;241744_x_at;;0	20540956;0	18717865;0	559477895;-0	205407602;0	733490145;6	993613105;7.42197592273897e-09 .;1 x 33; ;
205201_at;989;205201_at;GLI3;0	785307623;0	165550659;0	294955752;-0	332465353;0	732667149;6	976661119;7.84799114583734e-09 .;1 x 37;7 p14;"GLI family zinc finger 3 [Source:HGNC Symbol;Acc:HGNC:4319]"
218902_at;794;218902_at;NOTCH1;1	186542155;0	15730014;0	416631037;-0	378651175;0	732419475;6	971572529;7.98060373341514e-09 .;1 x 37;9 q34;"notch 1 [Source:HGNC Symbol;Acc:HGNC:7881]"
217234_s_at;394;217234_s_at;EZR;0	940525851;0	386650956;0	566174887;-0	921826169;0	731695565;6	956733542;8.3803159967033e-09 .;1 x 40;6 q25;"ezrin [Source:HGNC Symbol;Acc:HGNC:12691]"
215794_x_at;959;215794_x_at;GLUD1;1	61086253;0	215842978;0	323292341;-0	520300621;0	731432319;6	951350021;8.53025095004512e-09 .;1 x 40;10 q23;"glutamate dehydrogenase 1 [Source:HGNC Symbol;Acc:HGNC:4335]"
224296_x_at;446;224296_x_at;;0	206786881;0	191558329;0	548348638;-0	201032636;0	731011435;6	942756576;8.77518946396094e-09 .;1 x 33; ;
203381_s_at;622;203381_s_at;APOE;2	197573104;0	251460809;0	484120311;-0	606855937;0	730228052;6	926807034;9.24868182039518e-09 .;1 x 40;19 q13;"apolipoprotein E [Source:HGNC Symbol;Acc:HGNC:613]"
1557136_at;76;1557136_at;ATP13A4;0	483661447;0	306659749;0	765400761;-0	483644447;0	729553924;6	913128775;9.67514190985952e-09 .;1 x 40;3 q29;"ATPase 13A4 [Source:HGNC Symbol;Acc:HGNC:25422]"
221605_s_at;734;221605_s_at;PIPOX;0	783940849;0	328326506;0	44783123;-0	775670474;0	729442023;6	910862459;9.74768465944464e-09 .;1 x 40;17 q11;"pipecolic acid and sarcosine oxidase [Source:HGNC Symbol;Acc:HGNC:17804]"
223839_s_at;776;223839_s_at;;1	778925104;0	206730779;0	426714796;-0	613329092;0	728988629;6	901691993;1.00468441344148e-08 .;1 x 38; ;
204137_at;1022;204137_at;GPR137B;1	614438466;0	140623977;0	230961442;-0	337176225;0	728883286;6	899564087;1.01175687827748e-08 .;1 x 38;1 q42;"G protein-coupled receptor 137B [Source:HGNC Symbol;Acc:HGNC:11862]"
241727_x_at;801;241727_x_at;DHFR2;1	123505659;0	151586952;0	415066257;-0	27899564;0	728732867;6	896527452;1.02193635775905e-08 .;1 x 35;3 q11;"dihydrofolate reductase 2 [Source:HGNC Symbol;Acc:HGNC:27309]"
208228_s_at;822;208228_s_at;FGFR2;1	662746339;0	236161942;0	408289734;-0	575663372;0	727654991;6	874829597;1.09772884115955e-08 .;1 x 40;10 q26;"fibroblast growth factor receptor 2 [Source:HGNC Symbol;Acc:HGNC:3689]"
203382_s_at;534;203382_s_at;APOE;2	085839163;0	299706897;0	518892501;-0	867510297;0	727163973;6	864981253;1.13396845247138e-08 .;1 x 40;19 q13;"apolipoprotein E [Source:HGNC Symbol;Acc:HGNC:613]"
214176_s_at;132;214176_s_at;;0	521679414;0	253248207;0	711312593;-0	50553074;0	726872766;6	85915108;1.15598581817977e-08 .;1 x 39; ;
231992_x_at;979;231992_x_at;;1	350545292;0	102502029;0	306012337;-0	187853758;0	726209372;6	845898725;1.20764291899889e-08 .;2 x 35; ;
243573_at;168;243573_at;;0	146505794;0	189072302;0	679780465;-0	146504553;0	724369678;6	809358865;1.36240061454629e-08 .;1 x 34; ;
37512_at;91;37512_at;HSD17B6;1	068710003;0	419845454;0	746979093;-0	996804401;0	72312697;6	784849802;1.47721341825502e-08 .;1 x 40;12 q13;"hydroxysteroid 17-beta dehydrogenase 6 [Source:HGNC Symbol;Acc:HGNC:23316]"
203722_at;262;203722_at;ALDH4A1;0	716773998;0	357371129;0	625018554;-0	713793117;0	722407846;6	770730197;1.54771586657887e-08 .;1 x 40;1 p36;"aldehyde dehydrogenase 4 family member A1 [Source:HGNC Symbol;Acc:HGNC:406]"
201624_at;932;201624_at;DARS;1	344079294;0	133083015;0	343437224;-0	271188778;0	722042501;6	76357447;1.58472573952295e-08 .;1 x 37;2 q21;"aspartyl-tRNA synthetase [Source:HGNC Symbol;Acc:HGNC:2678]"
224894_at;720;224894_at;YAP1;1	160065719;0	19671483;0	453101427;-0	367198291;0	721886899;6	760530403;1.60073794219784e-08 .;2 x 40;11 q22;"Yes associated protein 1 [Source:HGNC Symbol;Acc:HGNC:16262]"
236594_at;854;236594_at;LLGL1;1	320914584;0	151066654;0	393228434;-0	339855543;0	721864118;6	760084926;1.60309479024789e-08 .;1 x 35;17 p11;"LLGL1	scribble cell polarity complex component [Source:HGNC Symbol;Acc:HGNC:6628]"
231925_at;27;231925_at;P2RY1;0	790661151;0	382165506;0	877362649;-0	749948975;0	721270574;6	748494175;1.66565639059257e-08 .;1 x 40;3 q25;"purinergic receptor P2Y1 [Source:HGNC Symbol;Acc:HGNC:8539]"
1559039_at;824;1559039_at;DHX36;0	821064928;0	184732504;0	406621645;-0	534487824;0	718910445;6	702710452;1.93767488720908e-08 .;1 x 36;CHR_HSCHR3_2_CTG2_1 ;"DEAH-box helicase 36 [Source:HGNC Symbol;Acc:HGNC:14410]"
226490_at;171;226490_at;NHSL1;0	990902448;0	389559623;0	678476144;-0	976992949;0	718890298;6	702321715;1.94016585020051e-08 .;1 x 40;6 q24;"NHS like 1 [Source:HGNC Symbol;Acc:HGNC:21021]"
203242_s_at;319;203242_s_at;PDLIM5;0	568502349;0	332380043;0	600403369;-0	564009118;0	717364401;6	672979756;2.13776190083337e-08 .;1 x 40;4 q22;"PDZ and LIM domain 5 [Source:HGNC Symbol;Acc:HGNC:17468]"
226510_at;893;226510_at;HEATR5A;1	128167548;0	176233784;0	373110995;-0	387403105;0	716848341;6	663101182;2.20873155321044e-08 .;2 x 39;14 q12;"HEAT repeat containing 5A [Source:HGNC Symbol;Acc:HGNC:20276]"
1558620_at;669;1558620_at;ZNF621;0	777783396;0	154680739;0	469842635;-0	291312653;0	716612134;6	658587153;2.24194329767613e-08 .;2 x 36;3 p22;"zinc finger protein 621 [Source:HGNC Symbol;Acc:HGNC:24787]"
244689_at;443;244689_at;PPARA;0	375804965;0	247040794;0	548939652;-0	357321971;0	716240875;6	651501725;2.29508708704529e-08 .;1 x 38;22 q13;"peroxisome proliferator activated receptor alpha [Source:HGNC Symbol;Acc:HGNC:9232]"
209253_at;867;209253_at;SORBS3;1	055186922;0	182745953;0	390205809;-0	338446802;0	715694416;6	641093738;2.37545128012329e-08 .;1 x 37;8 p21;"sorbin and SH3 domain containing 3 [Source:HGNC Symbol;Acc:HGNC:30907]"
1566600_at;66;1566600_at;;0	10760484;0	171338309;0	791830261;-0	10760484;0	71508592;6	629533588;2.46802447367855e-08 .;1 x 32; ;
203215_s_at;1027;203215_s_at;MYO6;1	773167668;0	09241782;0	219579719;-0	199887895;0	714862781;6	625302148;2.50280691727056e-08 .;2 x 36;6 q14;"myosin VI [Source:HGNC Symbol;Acc:HGNC:7605]"
221590_s_at;288;221590_s_at;ALDH6A1;1	139710631;0	312178665;0	611152915;-0	784933343;0	714265531;6	613996703;2.59816805847635e-08 .;1 x 40;14 q24;"aldehyde dehydrogenase 6 family member A1 [Source:HGNC Symbol;Acc:HGNC:7179]"
231771_at;167;231771_at;GJB6;1	691471488;0	367494804;0	679943207;-0	769339081;0	713988641;6	60876542;2.643518581813e-08 .;1 x 40;13 q12;"gap junction protein beta 6 [Source:HGNC Symbol;Acc:HGNC:4288]"
202704_at;719;202704_at;TOB1;1	859158028;0	13853026;0	453494198;-0	198517031;0	7131264;6	592515567;2.78951515220172e-08 .;1 x 36;17 q21;"transducer of ERBB2	1 [Source:HGNC Symbol;Acc:HGNC:11979]"
200885_at;699;200885_at;RHOC;1	222825564;0	19016418;0	461117497;-0	31181459;0	712935416;6	588924522;2.82285435027063e-08 .;1 x 37;1 p13;"ras homolog family member C [Source:HGNC Symbol;Acc:HGNC:669]"
232168_x_at;875;232168_x_at;MACF1;1	320699451;0	141171078;0	384292541;-0	264482086;0	712842822;6	587184558;2.83915152499148e-08 .;2 x 35;1 p34;"microtubule-actin crosslinking factor 1 [Source:HGNC Symbol;Acc:HGNC:13664]"
203216_s_at;1010;203216_s_at;MYO6;1	717404826;0	132950525;0	257443623;-0	351525039;0	712563552;6	581940956;2.88883785781735e-08 .;1 x 37;6 q14;"myosin VI [Source:HGNC Symbol;Acc:HGNC:7605]"
241114_s_at;30;241114_s_at;ACAA2;0	370307587;0	271446272;0	868117142;-0	369782047;0	71247805;6	58033684;2.90421127147056e-08 .;1 x 40;18 q21;"acetyl-CoA acyltransferase 2 [Source:HGNC Symbol;Acc:HGNC:83]"
224275_at;656;224275_at;ADGRV1;0	398760632;0	248365645;0	473355113;-0	397676812;0	712017409;6	571704884;2.9883568730682e-08 .;1 x 40;5 q14;"adhesion G protein-coupled receptor V1 [Source:HGNC Symbol;Acc:HGNC:17416]"
205316_at;704;205316_at;SLC15A2;1	350585101;0	283158382;0	459354731;-0	624635242;0	71169525;6	565678166;3.04855103383517e-08 .;1 x 40;3 q13;"solute carrier family 15 member 2 [Source:HGNC Symbol;Acc:HGNC:10921]"
220892_s_at;947;220892_s_at;PSAT1;1	58725915;0	225961914;0	332709647;-0	790955138;0	711526399;6	562522791;3.08054979303307e-08 .;1 x 40;9 q21;"phosphoserine aminotransferase 1 [Source:HGNC Symbol;Acc:HGNC:19129]"
218149_s_at;628;218149_s_at;ZNF395;1	024233731;0	204769695;0	482610548;-0	435169628;0	711372436;6	559647628;3.11000001307349e-08 .;1 x 37;8 p21;"zinc finger protein 395 [Source:HGNC Symbol;Acc:HGNC:18737]"
234473_at;730;234473_at;;0	053925887;0	115736421;0	449490797;-0	053925887;0	708839647;6	512621996;3.63377600232084e-08 .;2 x 33;13 q12;
1558387_at;878;1558387_at;UG0898H09;1	160204183;0	233086627;0	381814836;-0	585456438;0	707090823;6	480448186;4.04222020300438e-08 .;2 x 40;8 q12;"uncharacterized LOC643763 [Source:NCBI gene;Acc:643763]"
208849_at;788;208849_at;;0	081530294;0	129273888;0	418375348;-0	081530294;0	706491202;6	469471654;4.19184318367627e-08 .;1 x 34; ;
1555884_at;687;1555884_at;PSMD6;0	123025144;0	139365099;0	46427701;-0	123025144;0	704534421;6	433844007;4.71679819646909e-08 .;1 x 35;3 p14;"proteasome 26S subunit	non-ATPase 6 [Source:HGNC Symbol;Acc:HGNC:9564]"
202075_s_at;582;202075_s_at;PLTP;1	164223665;0	265649974;0	497209253;-0	64946727;0	704492802;6	433089407;4.72860162137323e-08 .;2 x 40;20 q13;"phospholipid transfer protein [Source:HGNC Symbol;Acc:HGNC:9093]"
205700_at;41;205700_at;HSD17B6;1	085861117;0	461202005;0	829188018;-1	085861117;0	703831453;6	421116249;4.91989374795665e-08 .;1 x 40;12 q13;"hydroxysteroid 17-beta dehydrogenase 6 [Source:HGNC Symbol;Acc:HGNC:23316]"
223437_at;715;223437_at;PPARA;0	723430028;0	282104531;0	456210223;-0	62547528;0	703293963;6	41140985;5.08064481596904e-08 .;1 x 40;22 q13;"peroxisome proliferator activated receptor alpha [Source:HGNC Symbol;Acc:HGNC:9232]"
209821_at;391;209821_at;IL33;0	563214063;0	278095102;0	568215839;-0	542573263;0	698560773;6	326862717;6.7230859657208e-08 .;1 x 40;9 p24;"interleukin 33 [Source:HGNC Symbol;Acc:HGNC:16028]"
238955_at;884;238955_at;RFTN2;0	945107393;0	233818526;0	376808132;-0	745170167;0	698528299;6	326288314;6.7358943534046e-08 .;1 x 39;2 q33;"raftlin family member 2 [Source:HGNC Symbol;Acc:HGNC:26402]"
1557383_a_at;158;1557383_a_at;;0	108785971;0	163146946;0	688501005;-0	108785971;0	698124024;6	319143952;6.8972595190786e-08 .;1 x 34;1 p35;
219313_at;595;219313_at;GRAMD1C;0	990154155;0	27875461;0	493807152;-0	606768071;0	697845778;6	314233641;7.01040345774118e-08 .;1 x 40;3 q13;"GRAM domain containing 1C [Source:HGNC Symbol;Acc:HGNC:25252]"
214177_s_at;917;214177_s_at;PBXIP1;1	462512269;0	226520742;0	358994465;-0	481228726;0	697662576;6	311003638;7.08584053654704e-08 .;1 x 40;1 q21;"PBX homeobox interacting protein 1 [Source:HGNC Symbol;Acc:HGNC:21199]"
210067_at;299;210067_at;AQP4;1	472968736;0	453187541;0	606977038;-1	465936398;0	69715622;6	302088712;7.29829175982744e-08 .;1 x 40;18 q11;"aquaporin 4 [Source:HGNC Symbol;Acc:HGNC:637]"
52255_s_at;820;52255_s_at;COL5A3;0	87141597;0	281860243;0	408546566;-0	611928004;0	696427174;6	289285314;7.61460914322498e-08 .;1 x 39;19 p13;"collagen type V alpha 3 chain [Source:HGNC Symbol;Acc:HGNC:14864]"
232244_at;191;232244_at;KIAA1161;0	896119963;0	36748484;0	666005889;-0	729094699;0	696278001;6	286670226;7.68088500580077e-08 .;1 x 40;9 p13;"KIAA1161 [Source:HGNC Symbol;Acc:HGNC:19918]"
215300_s_at;543;215300_s_at;FMO5;0	063934989;0	124082774;0	512672264;-0	063934989;0	696131528;6	28410401;7.74648336587802e-08 .;2 x 33;1 q21;"flavin containing monooxygenase 5 [Source:HGNC Symbol;Acc:HGNC:3773]"
235469_at;624;235469_at;;0	646927916;0	185225593;0	483442043;-0	376725722;0	695476581;6	272647897;8.04623292438578e-08 .;1 x 35; ;
219155_at;647;219155_at;PITPNC1;1	111774135;0	208650758;0	476280681;-0	45172605;0	695132577;6	266642832;8.20796358658171e-08 .;1 x 40;17 q24;"phosphatidylinositol transfer protein	cytoplasmic 1 [Source:HGNC Symbol;Acc:HGNC:21045]"
1566749_at;775;1566749_at;;0	2099654;0	194647969;0	427876778;-0	2099654;0	695114045;6	266319556;8.21676184870057e-08 .;1 x 35; ;
233903_s_at;913;233903_s_at;ARHGEF26;0	951863514;0	210835208;0	360311844;-0	526503654;0	694598317;6	257333079;8.4651507026301e-08 .;2 x 40;3 q25;"Rho guanine nucleotide exchange factor 26 [Source:HGNC Symbol;Acc:HGNC:24490]"
213591_at;1008;213591_at;ALDH7A1;0	955582904;0	175954167;0	266372533;-0	39231217;0	694323925;6	252559455;8.60013582570929e-08 .;1 x 37;5 q23;"aldehyde dehydrogenase 7 family member A1 [Source:HGNC Symbol;Acc:HGNC:877]"
211493_x_at;505;211493_x_at;DTNA;0	681626628;0	284916241;0	527384988;-0	667955307;0	693073073;6	230864754;9.24124962109474e-08 .;1 x 40;18 q12;"dystrobrevin alpha [Source:HGNC Symbol;Acc:HGNC:3057]"
209512_at;969;209512_at;HSDL2;1	175004115;0	198489637;0	316429286;-0	514035785;0	692908719;6	22802228;9.32871766501364e-08 .;1 x 40;9 q32;"hydroxysteroid dehydrogenase like 2 [Source:HGNC Symbol;Acc:HGNC:18572]"
230889_at;975;230889_at;;1	387673017;0	176563977;0	308533111;-0	341490336;0	692012754;6	212559509;9.81924388465671e-08 .;2 x 39;CHR_HSCHR18_2_CTG2_1 ;"long intergenic non-protein coding RNA 1896 [Source:HGNC Symbol;Acc:HGNC:52715]"
201579_at;938;201579_at;FAT1;1	517887614;0	201390803;0	340534396;-0	408330684;0	691930405;6	211141082;9.86551238479905e-08 .;1 x 38;4 q35;"FAT atypical cadherin 1 [Source:HGNC Symbol;Acc:HGNC:3595]"
1556889_s_at;480;1556889_s_at;;0	110446659;0	15650453;0	537892687;-0	110446659;0	691907039;6	210738694;9.87867778690088e-08 .;1 x 32; ;
205854_at;813;205854_at;TULP3;1	07865841;0	195395547;0	41104537;-0	414579743;0	691416567;6	202300915;1.01588294887378e-07 .;1 x 37;12 p13;"tubby like protein 3 [Source:HGNC Symbol;Acc:HGNC:12425]"
1559653_at;52;1559653_at;;0	074294285;0	166891124;0	810411492;-0	074294285;0	690859985;6	192745735;1.04856862193081e-07 .;1 x 32;13 q34;"GRTP1 antisense RNA 1 [Source:HGNC Symbol;Acc:HGNC:39917]"
210473_s_at;721;210473_s_at;ADGRA3;1	371195943;0	3423434;0	4529141;-1	170704364;0	69077868;6	191351686;1.05342439549183e-07 .;1 x 40;4 p15;"adhesion G protein-coupled receptor A3 [Source:HGNC Symbol;Acc:HGNC:13839]"
201651_s_at;900;201651_s_at;PACSIN2;1	693704034;0	102535819;0	368989243;-0	173832375;0	690479368;6	186223577;1.07148100614296e-07 .;2 x 32;22 q13;"protein kinase C and casein kinase substrate in neurons 2 [Source:HGNC Symbol;Acc:HGNC:8571]"
226435_at;72;226435_at;PAPLN;0	61524611;0	391419785;0	771559765;-0	61524611;0	690248558;6	182273261;1.08560122891177e-07 .;1 x 40;14 q24;"papilin	proteoglycan like sulfated glycoprotein [Source:HGNC Symbol;Acc:HGNC:19262]"
225693_s_at;1012;225693_s_at;CAMTA1;1	836647839;0	109748033;0	255298238;-0	210749477;0	690243521;6	182187094;1.08591129532876e-07 .;1 x 37;1 p36;"calmodulin binding transcription activator 1 [Source:HGNC Symbol;Acc:HGNC:18806]"
215436_at;437;215436_at;;0	345488316;0	276104012;0	551210428;-0	344121112;0	690033314;6	178592613;1.09892492994312e-07 .;1 x 39; ;
205160_at;1013;205160_at;PEX11A;0	943779115;0	175961522;0	253144989;-0	435900679;0	689880559;6	175982416;1.10847264034319e-07 .;1 x 37;15 q26;"peroxisomal biogenesis factor 11 alpha [Source:HGNC Symbol;Acc:HGNC:8852]"
208144_s_at;863;208144_s_at;TCEANC2;0	078266786;0	116969288;0	390968043;-0	078266786;0	689719074;6	173224745;1.1186499038196e-07 .;1 x 33;1 p32;"transcription elongation factor A N-terminal and central domain containing 2 [Source:HGNC Symbol;Acc:HGNC:26494]"
1555192_at;637;1555192_at;ZNF277;0	530745957;0	182335085;0	478390602;-0	337027145;0	688574042;6	153721432;1.19334429005136e-07 .;1 x 35;7 q31;"zinc finger protein 277 [Source:HGNC Symbol;Acc:HGNC:13070]"
241545_x_at;124;241545_x_at;;0	647031883;0	180480705;0	715525882;-0	351036037;0	6874126;6	134028022;1.27382671633036e-07 .;1 x 33; ;
209684_at;1006;209684_at;RIN2;1	56600926;0	129361019;0	27034877;-0	26035304;0	682807759;6	056818527;1.6452300388714e-07 .;1 x 37;20 p11;"Ras and Rab interactor 2 [Source:HGNC Symbol;Acc:HGNC:18750]"
201125_s_at;1024;201125_s_at;ITGB5;1	215325142;0	133493936;0	224048992;-0	236359963;0	681276961;6	031453562;1.78947247242434e-07 .;1 x 36;3 q21;"integrin subunit beta 5 [Source:HGNC Symbol;Acc:HGNC:6160]"
227376_at;252;227376_at;GLI3;0	287391554;0	31436989;0	62763002;-0	287391554;0	681134728;6	029104303;1.80345476996635e-07 .;1 x 40;7 p14;"GLI family zinc finger 3 [Source:HGNC Symbol;Acc:HGNC:4319]"
218979_at;136;218979_at;RMI1;0	852370187;0	228050426;0	707264973;-0	364556799;0	680548705;6	019438455;1.86214123898409e-07 .;1 x 37;9 q21;"RecQ mediated genome instability 1 [Source:HGNC Symbol;Acc:HGNC:25764]"
207838_x_at;536;207838_x_at;PBXIP1;0	552755964;0	284814667;0	516353419;-0	521527594;0	679440917;6	001225338;1.97795438472426e-07 .;1 x 40;1 q21;"PBX homeobox interacting protein 1 [Source:HGNC Symbol;Acc:HGNC:21199]"
1556155_at;924;1556155_at;GPR37L1;0	837248933;0	216128982;0	35495936;-0	724032641;0	678418059;5	984476248;2.09079539681412e-07 .;1 x 39;1 q32;"G protein-coupled receptor 37 like 1 [Source:HGNC Symbol;Acc:HGNC:14923]"
1559591_s_at;306;1559591_s_at;CHDH;0	816573279;0	256275042;0	603970064;-0	511928742;0	67652449;5	953639214;2.31562363506299e-07 .;1 x 40;3 p21;"choline dehydrogenase [Source:HGNC Symbol;Acc:HGNC:24288]"
223592_s_at;323;223592_s_at;RNF135;0	404109692;0	303657987;0	598645629;-0	403038154;0	675875608;5	943122347;2.39769379684063e-07 .;1 x 38;17 q11;"ring finger protein 135 [Source:HGNC Symbol;Acc:HGNC:21158]"
219550_at;302;219550_at;ROBO3;0	736924792;0	251591106;0	605925238;-0	524858184;0	675627154;5	93910223;2.42982688525295e-07 .;1 x 36;11 q24;"roundabout guidance receptor 3 [Source:HGNC Symbol;Acc:HGNC:13433]"
241303_x_at;765;241303_x_at;;1	530823783;0	130585658;0	432474395;-0	215783598;0	674129607;5	914949707;2.63213091322712e-07 .;3 x 34; ;
223842_s_at;387;223842_s_at;SCARA3;0	659526548;0	28535797;0	569569887;-0	54504394;0	673858974;5	910599228;2.67031809331186e-07 .;1 x 40;8 p21;"scavenger receptor class A member 3 [Source:HGNC Symbol;Acc:HGNC:19000]"
1552858_at;6;1552858_at;MAGEB6;0	094887708;0	183718588;0	990406327;-0	09478055;0	673070502;5	897949209;2.78452549462571e-07 .;1 x 31;X p21;"MAGE family member B6 [Source:HGNC Symbol;Acc:HGNC:23796]"
211162_x_at;290;211162_x_at;SCD;0	637928228;0	356268675;0	610905302;-0	616224833;0	671881868;5	87894852;2.96528923082739e-07 .;1 x 40;10 q24;"stearoyl-CoA desaturase [Source:HGNC Symbol;Acc:HGNC:10571]"
212665_at;561;212665_at;TIPARP;1	213358401;0	239318704;0	50401728;-0	352806837;0	671786169;5	87742235;2.98030657042148e-07 .;1 x 38;3 q25;"TCDD inducible poly(ADP-ribose) polymerase [Source:HGNC Symbol;Acc:HGNC:23696]"
205577_at;152;205577_at;PYGM;0	386456705;0	342041726;0	692112582;-0	386456705;0	6716168;5	874722634;3.00705749856078e-07 .;1 x 40;11 q13;"glycogen phosphorylase	muscle associated [Source:HGNC Symbol;Acc:HGNC:9726]"
226423_at;802;226423_at;PAQR8;1	800624736;0	192143815;0	414712056;-0	535169369;0	670860191;5	862682899;3.12930260926159e-07 .;1 x 38;6 p12;"progestin and adipoQ receptor family member 8 [Source:HGNC Symbol;Acc:HGNC:15708]"
1566966_at;462;1566966_at;;0	093995213;0	137676598;0	54334326;-0	093995213;0	670688945;5	85996253;3.15760321445424e-07 .;3 x 34; ;
234074_at;267;234074_at;;0	228840013;0	226789044;0	621839574;-0	22158507;0	670661996;5	859534566;3.16207859007989e-07 .;1 x 37; ;
216804_s_at;526;216804_s_at;PDLIM5;0	973271082;0	286982985;0	520738385;-0	779967651;0	669731226;5	844779768;3.32030557048668e-07 .;1 x 40;4 q22;"PDZ and LIM domain 5 [Source:HGNC Symbol;Acc:HGNC:17468]"
1559965_at;111;1559965_at;ZFHX4-AS1;0	259876765;0	231033192;0	725441029;-0	259300314;0	666821965;5	798981903;3.86348620651233e-07 .;1 x 37;8 q21;"ZFHX4 antisense RNA 1 [Source:HGNC Symbol;Acc:HGNC:44165]"
1569128_at;886;1569128_at;;0	96482658;0	136286309;0	376593809;-0	234330146;0	665754288;5	78229474;4.08270032670188e-07 .;2 x 32; ;
233461_x_at;948;233461_x_at;ZNF226;1	226847273;0	139400556;0	332557568;-0	31652238;0	665264777;5	774665328;4.18701344928607e-07 .;1 x 35;19 q13;"zinc finger protein 226 [Source:HGNC Symbol;Acc:HGNC:13019]"
219468_s_at;593;219468_s_at;CUEDC1;0	695831779;0	212056251;0	493945353;-0	452933322;0	663592491;5	748701939;4.56230353163001e-07 .;1 x 37;17 q22;"CUE domain containing 1 [Source:HGNC Symbol;Acc:HGNC:31350]"
227085_at;927;227085_at;;0	762465824;0	209052105;0	352130639;-0	67968284;0	661143656;5	710959412;5.16840491404658e-07 .;1 x 39; ;
1563498_s_at;255;1563498_s_at;;0	153212484;0	197822658;0	627016941;-0	153212484;0	659704;5	688922541;5.55871275231823e-07 .;1 x 33; ;
210756_s_at;431;210756_s_at;NOTCH2;0	750820278;0	323332081;0	553060412;-0	617663001;0	659399931;5	684282368;5.64456645424372e-07 .;1 x 40;1 p12;"notch 2 [Source:HGNC Symbol;Acc:HGNC:7882]"
241510_at;473;241510_at;;0	12176823;0	18736582;0	540345902;-0	12176823;0	658879566;5	676352899;5.79434668690482e-07 .;1 x 33;3 q24;
235795_at;535;235795_at;PAX6;0	88073661;0	332682229;0	518552426;-0	865487183;0	658856144;5	675996319;5.80117435422522e-07 .;1 x 40;11 p13;"paired box 6 [Source:HGNC Symbol;Acc:HGNC:8620]"
239752_at;55;239752_at;CECR2;0	456011772;0	268373646;0	807229993;-0	450304114;0	658815994;5	675385157;5.81289531842444e-07 .;1 x 36;22 q11;"CECR2	histone acetyl-lysine reader [Source:HGNC Symbol;Acc:HGNC:1840]"
228594_at;1000;228594_at;NADK2;1	84736569;0	12062084;0	282045662;-0	250940099;0	658369885;5	668600192;5.94461314840089e-07 .;2 x 36;5 p13;"NAD kinase 2	mitochondrial [Source:HGNC Symbol;Acc:HGNC:26404]"
1558557_at;189;1558557_at;C16orf62;0	241876854;0	198248448;0	667557089;-0	241105076;0	657956595;5	662323799;6.06910226630397e-07 .;1 x 33;16 p12;"chromosome 16 open reading frame 62 [Source:HGNC Symbol;Acc:HGNC:24641]"
217678_at;916;217678_at;SLC7A11;1	757980098;0	217368347;0	359757498;-0	441104554;0	657598643;5	656895077;6.17886956266744e-07 .;2 x 40;4 q28;"solute carrier family 7 member 11 [Source:HGNC Symbol;Acc:HGNC:11059]"
217536_x_at;447;217536_x_at;;0	505550512;0	253173888;0	548274319;-0	460769779;0	657297273;5	652329723;6.27270821951242e-07 .;1 x 36; ;
202822_at;971;202822_at;LPP;1	08060467;0	155288909;0	315015141;-0	314351439;0	656863483;5	645766755;6.41009792801128e-07 .;1 x 36;3 q27;"LIM domain containing preferred translocation partner in lipoma [Source:HGNC Symbol;Acc:HGNC:6679]"
229719_s_at;538;229719_s_at;;0	150905632;0	168864876;0	515409945;-0	150607134;0	656213355;5	63594918;6.62123148087446e-07 .;1 x 33; ;
1563012_x_at;87;1563012_x_at;;0	581447394;0	255937827;0	750964754;-0	526224167;0	65486945;5	615724647;7.07823901380245e-07 .;1 x 33; ;
232993_at;508;232993_at;;0	119883249;0	157809103;0	525786429;-0	1196267;0	654478281;5	609855481;7.21664560110469e-07 .;1 x 33; ;
233270_x_at;411;233270_x_at;;1	015917298;0	172465065;0	5593296;-0	268372293;0	653825639;5	600080656;7.45315822947568e-07 .;3 x 34; ;
231544_s_at;7;231544_s_at;;0	222142996;0	228769346;0	985543212;-0	220066532;0	653588338;5	596531941;7.5409184185915e-07 .;1 x 32; ;
204101_at;163;204101_at;MTM1;0	640202156;0	217141688;0	683665945;-0	594606397;0	653352896;5	593013884;7.62893524242081e-07 .;1 x 34;X q28;"myotubularin 1 [Source:HGNC Symbol;Acc:HGNC:7448]"
37802_r_at;960;37802_r_at;MINDY2;0	988407587;0	122684532;0	3231559;-0	311165151;0	653106347;5	589332895;7.72212282784679e-07 .;1 x 34;15 q21;"MINDY lysine 48 deubiquitinase 2 [Source:HGNC Symbol;Acc:HGNC:26954]"
215734_at;164;215734_at;IZUMO4;0	410557957;0	238139546;0	683345479;-0	395663073;0	652405859;5	578891439;7.9926655160989e-07 .;1 x 36;19 p13;"IZUMO family member 4 [Source:HGNC Symbol;Acc:HGNC:26950]"
214282_at;709;214282_at;CP;0	105867016;0	154427607;0	457681639;-0	105867016;0	651402548;5	563979468;8.39546819841885e-07 .;1 x 34;3 q25;"ceruloplasmin [Source:HGNC Symbol;Acc:HGNC:2295]"
211792_s_at;382;211792_s_at;CDKN2C;0	469146073;0	25594407;0	573801574;-0	459788548;0	651093105;5	559390543;8.52344073098976e-07 .;1 x 36;1 p32;"cyclin dependent kinase inhibitor 2C [Source:HGNC Symbol;Acc:HGNC:1789]"
243901_at;69;243901_at;ALDOB;0	055747126;0	138523789;0	781606575;-0	055747126;0	650355693;5	548474358;8.83571402932048e-07 .;1 x 30;9 q31;"aldolase	fructose-bisphosphate B [Source:HGNC Symbol;Acc:HGNC:417]"
241909_at;642;241909_at;;0	133880711;0	156981988;0	477767309;-0	133880711;0	649622749;5	537651248;9.15655469890808e-07 .;2 x 34; ;
229876_at;106;229876_at;PHKA1;0	462332565;0	324743101;0	730971566;-0	462323821;0	64944277;5	534997654;9.23697039523219e-07 .;1 x 40;X q13;"phosphorylase kinase regulatory subunit alpha 1 [Source:HGNC Symbol;Acc:HGNC:8925]"
208238_x_at;988;208238_x_at;;1	4335116;0	150806971;0	295440076;-0	267982455;0	649069917;5	529505467;9.40564583329362e-07 .;2 x 35; ;
204311_at;668;204311_at;ATP1B2;2	019558513;0	245315947;0	470187026;-0	637802784;0	648980441;5	528188496;9.44654568124648e-07 .;1 x 40;17 p13;"ATPase Na+/K+ transporting subunit beta 2 [Source:HGNC Symbol;Acc:HGNC:805]"
225510_at;682;225510_at;OAF;1	025931275;0	260020416;0	465629393;-0	424545045;0	648459154;5	520523691;9.68811767254607e-07 .;1 x 40;11 q23;"out at first homolog [Source:HGNC Symbol;Acc:HGNC:28752]"
202662_s_at;771;202662_s_at;ITPR2;0	678047291;0	240328192;0	429142042;-0	521040719;0	648279415;5	517883991;9.77272718860611e-07 .;2 x 40;12 p11;"inositol 1	4	5-trisphosphate receptor type 2 [Source:HGNC Symbol;Acc:HGNC:6181]"
213712_at;589;213712_at;ELOVL2;1	608072353;0	301214062;0	494749709;-0	827988318;0	648147753;5	515951371;9.83513834373895e-07 .;1 x 40;6 p24;"ELOVL fatty acid elongase 2 [Source:HGNC Symbol;Acc:HGNC:14416]"
1569663_at;551;1569663_at;;0	092493129;0	139407538;0	509210716;-0	092493129;0	647387712;5	504811663;1.02026813919576e-06 .;1 x 33; ;
228692_at;768;228692_at;PREX2;1	498728602;0	210544975;0	431110338;-0	495301208;0	647202378;5	502099563;1.02942118318516e-06 .;1 x 39;8 q13;"phosphatidylinositol-3	4	5-trisphosphate dependent Rac exchange factor 2 [Source:HGNC Symbol;Acc:HGNC:22950]"
226225_at;691;226225_at;MCC;1	328052229;0	18320416;0	463560197;-0	284114474;0	645707279;5	48028213;1.10608450953897e-06 .;2 x 40;5 q22;"mutated in colorectal cancers [Source:HGNC Symbol;Acc:HGNC:6935]"
212070_at;751;212070_at;ADGRG1;1	939847375;0	198227537;0	439433012;-0	501223508;0	64545573;5	476622038;1.11949017878032e-06 .;2 x 40;16 q21;"adhesion G protein-coupled receptor G1 [Source:HGNC Symbol;Acc:HGNC:4512]"
214761_at;495;214761_at;ZNF423;1	448476351;0	222137379;0	530657204;-0	521219164;0	645293301;5	474260265;1.12822613307362e-06 .;1 x 38;16 q12;"zinc finger protein 423 [Source:HGNC Symbol;Acc:HGNC:16762]"
1559534_at;459;1559534_at;LOC100996419;0	295723368;0	222582964;0	545570115;-0	292600438;0	644415934;5	461525068;1.17651308173539e-06 .;1 x 34;5 q35;
212876_at;823;212876_at;B4GALT4;1	055783847;0	136975806;0	406623096;-0	264215142;0	643773021;5	452216466;1.21310161382837e-06 .;1 x 33;3 q13;"beta-1	4-galactosyltransferase 4 [Source:HGNC Symbol;Acc:HGNC:927]"
206466_at;238;206466_at;ACSBG1;0	41579719;0	304199908;0	636777176;-0	41578348;0	643461899;5	447718867;1.23118284700574e-06 .;1 x 40;15 q25;"acyl-CoA synthetase bubblegum family member 1 [Source:HGNC Symbol;Acc:HGNC:29567]"
219805_at;193;219805_at;CXorf56;0	825954255;0	189334842;0	664526119;-0	324663996;0	642850793;5	438898117;1.26742509376498e-06 .;1 x 32;X q24;"chromosome X open reading frame 56 [Source:HGNC Symbol;Acc:HGNC:26239]"
1558189_a_at;796;1558189_a_at;GPR37L1;1	222102677;0	210831091;0	416208446;-0	434086264;0	642184807;5	429305357;1.30804318931865e-06 .;1 x 40;1 q32;"G protein-coupled receptor 37 like 1 [Source:HGNC Symbol;Acc:HGNC:14923]"
225817_at;757;225817_at;CGNL1;1	154582566;0	202114035;0	436998663;-0	435797009;0	641779599;5	423479061;1.33334163021637e-06 .;1 x 37;15 q21;"cingulin like 1 [Source:HGNC Symbol;Acc:HGNC:25931]"
1559126_at;200;1559126_at;RRP12;0	776763852;0	197335798;0	660639508;-0	533090359;0	640900121;5	410859984;1.38981345532141e-06 .;1 x 34;10 q24;"ribosomal RNA processing 12 homolog [Source:HGNC Symbol;Acc:HGNC:29100]"
244039_x_at;803;244039_x_at;;0	67574851;0	172268638;0	414521874;-0	293163924;0	640140617;5	399991448;1.44035123783581e-06 .;1 x 34; ;
1552783_at;112;1552783_at;ZNF417;0	425086965;0	250773826;0	725212243;-0	392467547;0	640046413;5	398645255;1.44673660540384e-06 .;1 x 34;19 q13;"zinc finger protein 417 [Source:HGNC Symbol;Acc:HGNC:20646]"
224361_s_at;223;224361_s_at;IL17RB;0	726484081;0	304428292;0	647298483;-0	695805672;0	639432286;5	389879372;1.48900861329793e-06 .;1 x 40;3 p21;"interleukin 17 receptor B [Source:HGNC Symbol;Acc:HGNC:18015]"
217446_x_at;908;217446_x_at;;1	050786313;0	171458457;0	363936664;-0	38091;0	638905364;5	382372155;1.52618430504514e-06 .;1 x 34; ;
1562953_s_at;385;1562953_s_at;WDFY3-AS2;0	377995839;0	294491964;0	571264291;-0	377995839;0	638660202;5	378883611;1.54377174887976e-06 .;1 x 39;4 q21;"WDFY3 antisense RNA 2 [Source:HGNC Symbol;Acc:HGNC:21603]"
229169_at;144;229169_at;CFAP70;0	155701408;0	224994026;0	696884516;-0	155701408;0	638379117;5	374887313;1.56416642427271e-06 .;1 x 33;10 q22;"cilia and flagella associated protein 70 [Source:HGNC Symbol;Acc:HGNC:30726]"
235852_at;386;235852_at;;0	540676123;0	30930026;0	570687482;-0	540579519;0	638364532;5	374680057;1.56523139360765e-06 .;1 x 40; ;
235178_x_at;477;235178_x_at;ESCO2;0	227539576;0	192681666;0	539035601;-0	225746412;0	638292232;5	373652777;1.57052065563601e-06 .;1 x 34;8 p21;"establishment of sister chromatid cohesion N-acetyltransferase 2 [Source:HGNC Symbol;Acc:HGNC:27230]"
1558388_a_at;739;1558388_a_at;UG0898H09;1	686415079;0	272979652;0	445695162;-0	773787138;0	638128053;5	371320903;1.58259295712782e-06 .;1 x 40;8 q12;"uncharacterized LOC643763 [Source:NCBI gene;Acc:643763]"
1569916_at;550;1569916_at;;0	456420875;0	237142568;0	509215672;-0	45354972;0	638098812;5	370905726;1.58475200162655e-06 .;1 x 36; ;
239539_at;2;239539_at;NEK3;0	119096141;0	248163026;1	307133997;-0	119096141;0	637127798;5	357140757;1.65801359208739e-06 .;1 x 30;13 q14;"NIMA related kinase 3 [Source:HGNC Symbol;Acc:HGNC:7746]"
223321_s_at;4;223321_s_at;FGFRL1;0	391917218;0	290820795;1	049228202;-0	391120351;0	636752104;5	351826504;1.68718871451645e-06 .;1 x 40;4 p16;"fibroblast growth factor receptor like 1 [Source:HGNC Symbol;Acc:HGNC:3693]"
1560540_x_at;10;1560540_x_at;;0	300965045;0	261710001;0	975709634;-0	299353491;0	636694855;5	35101728;1.69167581276497e-06 .;1 x 33; ;
233367_at;75;233367_at;;0	184922898;0	236077262;0	766357175;-0	184922898;0	63643683;5	347371847;1.71203684096177e-06 .;1 x 33; ;
243834_at;380;243834_at;;0	839621245;0	239020434;0	574963127;-0	514860483;0	635282311;5	331097493;1.80594198151418e-06 .;1 x 33; ;
237000_at;364;237000_at;;0	258919033;0	220329323;0	581133927;-0	253164788;0	634417516;5	318946433;1.87937161144625e-06 .;1 x 33; ;
230790_x_at;564;230790_x_at;;0	649770577;0	179432978;0	502699295;-0	481304822;0	6333149;5	303502249;1.97699105675131e-06 .;1 x 35; ;
204554_at;952;204554_at;PPP1R3D;0	779030031;0	223684643;0	327033511;-0	650365383;0	631800979;5	282384749;2.11865840693548e-06 .;1 x 40;20 q13;"protein phosphatase 1 regulatory subunit 3D [Source:HGNC Symbol;Acc:HGNC:9294]"
222765_x_at;684;222765_x_at;ESF1;1	109041119;0	138334123;0	464848414;-0	305931413;0	631343284;5	276020265;2.16329670887916e-06 .;1 x 33;20 p12;"ESF1 nucleolar pre-rRNA processing protein homolog [Source:HGNC Symbol;Acc:HGNC:15898]"
230353_at;109;230353_at;MIR497HG;0	177693259;0	232477931;0	728654599;-0	177693259;0	630950809;5	270570008;2.20226342118046e-06 .;1 x 32;17 p13;"mir-497-195 cluster host gene [Source:HGNC Symbol;Acc:HGNC:39523]"
242235_x_at;996;242235_x_at;NRDC;1	691567005;0	117465094;0	287709739;-0	195515484;0	630429744;5	263344428;2.25499776096427e-06 .;2 x 34;1 p32;"nardilysin convertase [Source:HGNC Symbol;Acc:HGNC:7995]"
1557751_at;594;1557751_at;;0	933497323;0	158921804;0	493815618;-0	286115137;0	630055002;5	258155185;2.29364100234886e-06 .;1 x 33; ;
232681_at;1020;232681_at;;1	384535695;0	142672164;0	245487404;-0	41707717;0	629147286;5	245610826;2.38978952982194e-06 .;2 x 36; ;
218581_at;677;218581_at;ABHD4;0	584785136;0	225930009;0	467511518;-0	560875246;0	628774378;5	240467667;2.43035557923044e-06 .;1 x 36;14 q11;"abhydrolase domain containing 4 [Source:HGNC Symbol;Acc:HGNC:20154]"
242879_x_at;1009;242879_x_at;AKT3;1	071827586;0	117266428;0	260522919;-0	191087412;0	628727388;5	23981999;2.43551220879823e-06 .;2 x 36;1 q44;"AKT serine/threonine kinase 3 [Source:HGNC Symbol;Acc:HGNC:393]"
215464_s_at;953;215464_s_at;;0	742410294;0	176858724;0	326621958;-0	386253731;0	628010009;5	229944109;2.51549815988295e-06 .;1 x 36;17 p13;"P2RX5-TAX1BP3 readthrough (NMD candidate) [Source:HGNC Symbol;Acc:HGNC:49191]"
212158_at;926;212158_at;SDC2;1	686596144;0	174977223;0	353518625;-0	285407625;0	627705706;5	225761541;2.55015312156104e-06 .;1 x 39;8 q22;"syndecan 2 [Source:HGNC Symbol;Acc:HGNC:10659]"
217528_at;224;217528_at;CLCA2;0	143480137;0	193830015;0	646489207;-0	143278959;0	62751282;5	223112424;2.57234690659303e-06 .;1 x 34;1 p22;"chloride channel accessory 2 [Source:HGNC Symbol;Acc:HGNC:2016]"
241647_x_at;155;241647_x_at;;0	09807101;0	15521897;0	691364622;-0	09807101;0	627197521;5	21878548;2.60900960635801e-06 .;1 x 31; ;
206405_x_at;554;206405_x_at;USP6;1	58953093;0	148019121;0	506147494;-0	315116012;0	627071088;5	217051591;2.62384596139142e-06 .;2 x 33;17 p13;"ubiquitin specific peptidase 6 [Source:HGNC Symbol;Acc:HGNC:12629]"
201147_s_at;968;201147_s_at;TIMP3;1	019655834;0	160680816;0	316671586;-0	397850168;0	626143773;5	204355215;2.73506264858447e-06 .;1 x 38;22 q12;"TIMP metallopeptidase inhibitor 3 [Source:HGNC Symbol;Acc:HGNC:11822]"
232457_at;638;232457_at;;0	891988482;0	158562469;0	478331935;-0	262016436;0	626011042;5	2025409;2.75133240679182e-06 .;1 x 33; ;
229222_at;309;229222_at;ACSS3;0	803951236;0	302686678;0	603492578;-0	54843452;0	625818096;5	199904831;2.77514222601916e-06 .;1 x 40;12 q21;"acyl-CoA synthetase short chain family member 3 [Source:HGNC Symbol;Acc:HGNC:24723]"
217579_x_at;767;217579_x_at;;1	310218821;0	158319626;0	431210865;-0	294943583;0	624706547;5	184749078;2.91604822266756e-06 .;2 x 34; ;
1564656_at;129;1564656_at;;0	150251692;0	188562548;0	71343413;-0	150251692;0	624588703;5	183145336;2.93136701889907e-06 .;1 x 32; ;
242039_at;738;242039_at;;0	67132944;0	200777159;0	445848895;-0	453244161;0	623973663;5	174784647;3.0125279496529e-06 .;1 x 33; ;
1555939_at;93;1555939_at;;0	122893306;0	169165013;0	74453707;-0	122893306;0	623102733;5	162972393;3.13100172677494e-06 .;1 x 31;17 q24;"PRKCA antisense RNA 1 [Source:HGNC Symbol;Acc:HGNC:51347]"
1562431_x_at;47;1562431_x_at;;0	227145814;0	208772277;0	819919314;-0	225350871;0	622746528;5	15815031;3.18068193050358e-06 .;1 x 32; ;
209436_at;341;209436_at;SPON1;1	571574452;0	324805247;0	590083301;-0	86519127;0	622653523;5	156892128;3.19377245494579e-06 .;1 x 40;11 p15;"spondin 1 [Source:HGNC Symbol;Acc:HGNC:11252]"
203243_s_at;964;203243_s_at;PDLIM5;1	418250136;0	261959222;0	321659142;-0	780270473;0	622467723;5	154379666;3.22007275332936e-06 .;1 x 40;4 q22;"PDZ and LIM domain 5 [Source:HGNC Symbol;Acc:HGNC:17468]"
237108_x_at;575;237108_x_at;LINC00982;0	770549695;0	287485169;0	500586745;-0	648181804;0	622417763;5	153704341;3.22717850165244e-06 .;1 x 40;1 p36;"long intergenic non-protein coding RNA 982 [Source:HGNC Symbol;Acc:HGNC:48664]"
227804_at;209;227804_at;TLCD1;0	129294713;0	222987016;0	656091018;-0	129294713;0	62236052;5	15293068;3.23533804125198e-06 .;1 x 38;17 q11;"TLC domain containing 1 [Source:HGNC Symbol;Acc:HGNC:25177]"
215392_at;348;215392_at;;0	192665286;0	188195045;0	587955732;-0	192663051;0	622313741;5	152298552;3.24202003798568e-06 .;1 x 34; ;
203633_at;899;203633_at;CPT1A;1	330076203;0	176087306;0	369968659;-0	346103973;0	621971714;5	147679416;3.29126381726219e-06 .;1 x 38;11 q13;"carnitine palmitoyltransferase 1A [Source:HGNC Symbol;Acc:HGNC:2328]"
240676_at;345;240676_at;;0	191978871;0	214452999;0	589302582;-0	191978871;0	621004368;5	134641244;3.4342927919262e-06 .;1 x 33; ;
204712_at;276;204712_at;WIF1;2	053264221;0	289640377;0	618569546;-0	594787865;0	620591071;5	12908236;3.49712931213553e-06 .;1 x 40;12 q14;"WNT inhibitory factor 1 [Source:HGNC Symbol;Acc:HGNC:18081]"
238049_at;71;238049_at;;0	428876787;0	316375223;0	774487551;-0	428532705;0	619948857;5	120458326;3.59687329487546e-06 .;1 x 40; ;
221964_at;322;221964_at;TULP3;0	308394533;0	248412817;0	599226389;-0	308394533;0	619726875;5	117481305;3.63195470898248e-06 .;1 x 39;12 p13;"tubby like protein 3 [Source:HGNC Symbol;Acc:HGNC:12425]"
224999_at;489;224999_at;EGFR;1	280545271;0	251333473;0	534515269;-0	574735914;0	619357571;5	112532945;3.69101737329736e-06 .;2 x 40;7 p11;"epidermal growth factor receptor [Source:HGNC Symbol;Acc:HGNC:3236]"
238108_at;492;238108_at;;0	975661226;0	154594005;0	5332597;-0	204305707;0	619157524;5	109854791;3.72337877374562e-06 .;1 x 33; ;
221527_s_at;95;221527_s_at;PARD3;0	23602487;0	257642667;0	741644796;-0	23602487;0	618711012;5	103882865;3.79655513338406e-06 .;2 x 40;10 p11;"par-3 family cell polarity regulator [Source:HGNC Symbol;Acc:HGNC:16051]"
1561073_at;18;1561073_at;;0	254145757;0	250042276;0	899956834;-0	247698103;0	618346716;5	099016489;3.85723578100183e-06 .;1 x 32; ;
227113_at;532;227113_at;ADHFE1;1	067285276;0	222659223;0	51911467;-0	675451668;0	617055582;5	081811888;4.07956200176862e-06 .;1 x 38;8 q13;"alcohol dehydrogenase	iron containing 1 [Source:HGNC Symbol;Acc:HGNC:16354]"
1563055_at;356;1563055_at;;0	091898722;0	135951811;0	584576775;-0	091854555;0	615611162;5	062643241;4.34222380241156e-06 .;1 x 33; ;
1555411_a_at;1002;1555411_a_at;CCNL1;1	40520372;0	123578996;0	278226494;-0	253163973;0	615223704;5	057515359;4.41528147954173e-06 .;3 x 34;3 q25;"cyclin L1 [Source:HGNC Symbol;Acc:HGNC:20569]"
206028_s_at;688;206028_s_at;MERTK;0	819622748;0	296973252;0	463959911;-0	683256045;0	614619653;5	049532701;4.53143796663724e-06 .;1 x 40;2 q13;"MER proto-oncogene	tyrosine kinase [Source:HGNC Symbol;Acc:HGNC:7027]"
227119_at;1025;227119_at;CNOT6L;1	318120554;0	119913688;0	221206524;-0	328775346;0	614590243;5	049144411;4.53716445714125e-06 .;2 x 36;4 q21;"CCR4-NOT transcription complex subunit 6 like [Source:HGNC Symbol;Acc:HGNC:18042]"
1559895_x_at;92;1559895_x_at;;0	149905071;0	179028589;0	746793674;-0	149905071;0	61351325;5	034948337;4.75151431711396e-06 .;1 x 31; ;
241175_at;14;241175_at;;0	105018227;0	200796542;0	922058642;-0	105018227;0	613505844;5	034850874;4.75302001690103e-06 .;1 x 34; ;
220868_s_at;497;220868_s_at;SLC7A10;0	595765305;0	354704596;0	529856999;-0	594728354;0	613378646;5	033177266;4.7789491111061e-06 .;1 x 40;19 q13;"solute carrier family 7 member 10 [Source:HGNC Symbol;Acc:HGNC:11058]"
240659_x_at;384;240659_x_at;;0	169534076;0	179730613;0	572911638;-0	169085465;0	613238258;5	03133084;4.80771795841051e-06 .;1 x 34; ;
1556888_at;245;1556888_at;;0	261975694;0	231218554;0	629894028;-0	261712972;0	613023927;5	028513375;4.85194674904044e-06 .;1 x 38; ;
219909_at;662;219909_at;MMP28;0	540662023;0	212992109;0	471410661;-0	534515034;0	612320419;5	019277961;4.99976461787455e-06 .;1 x 36;CHR_HSCHR17_7_CTG4 ;"matrix metallopeptidase 28 [Source:HGNC Symbol;Acc:HGNC:14366]"
203505_at;347;203505_at;;0	930100139;0	275673146;0	588246169;-0	476197294;0	611553219;5	009228151;5.16567839792259e-06 .;1 x 39; ;
1554460_at;425;1554460_at;ST8SIA4;0	10928881;0	156093594;0	553858048;-0	10928881;0	611000767;5	002005381;5.2882701462309e-06 .;1 x 33;5 q21;"ST8 alpha-N-acetyl-neuraminide alpha-2	8-sialyltransferase 4 [Source:HGNC Symbol;Acc:HGNC:10871]"
1555630_a_at;493;1555630_a_at;RAB34;0	520782679;0	346698961;0	532921826;-0	520782679;0	609394583;4	981072185;5.66004653190788e-06 .;1 x 40;17 q11;"RAB34	member RAS oncogene family [Source:HGNC Symbol;Acc:HGNC:16519]"
243579_at;770;243579_at;MSI2;0	531906621;0	268022478;0	429737059;-0	525891804;0	609132709;4	977668499;5.72289046874008e-06 .;1 x 40;17 q22;"musashi RNA binding protein 2 [Source:HGNC Symbol;Acc:HGNC:18585]"
217028_at;78;217028_at;CXCR4;0	589662937;0	357836119;0	762571796;-0	58443066;0	608517533;4	96968295;5.87305064514432e-06 .;1 x 40;2 q22;"C-X-C motif chemokine receptor 4 [Source:HGNC Symbol;Acc:HGNC:2561]"
1562076_at;81;1562076_at;;0	170265926;0	225945264;0	758342431;-0	170265926;0	60781031;4	960520135;6.05014840249218e-06 .;1 x 32; ;
208630_at;1005;208630_at;HADHA;1	361078047;0	154423923;0	271657785;-0	468728695;0	607364389;4	954752388;6.16432159716851e-06 .;1 x 36;2 p23;"hydroxyacyl-CoA dehydrogenase/3-ketoacyl-CoA thiolase/enoyl-CoA hydratase (trifunctional protein)	alpha subunit [Source:HGNC Symbol;Acc:HGNC:4801]"
224710_at;438;224710_at;RAB34;0	704674577;0	292035492;0	550917138;-0	704661016;0	607068247;4	950926051;6.24123599024529e-06 .;1 x 40;17 q11;"RAB34	member RAS oncogene family [Source:HGNC Symbol;Acc:HGNC:16519]"
239493_at;25;239493_at;RPL7;0	586828071;0	265937529;0	881262094;-0	501993428;0	606592181;4	944781831;6.3667306069437e-06 .;1 x 34;8 q21;"ribosomal protein L7 [Source:HGNC Symbol;Acc:HGNC:10363]"
231861_at;134;231861_at;LRP10;0	183368408;0	20025176;0	707716347;-0	183368408;0	606112631;4	938601162;6.49548361697505e-06 .;1 x 35;14 q11;"LDL receptor related protein 10 [Source:HGNC Symbol;Acc:HGNC:14553]"
52741_at;929;52741_at;TRMT61A;1	039444574;0	13259371;0	347051924;-0	258564717;0	606074782;4	938113709;6.50574674687654e-06 .;1 x 34;14 q32;"tRNA methyltransferase 61A [Source:HGNC Symbol;Acc:HGNC:23790]"
204865_at;500;204865_at;CA3;0	138675464;0	172998577;0	528693352;-0	138675464;0	605310467;4	928281496;6.7162130581444e-06 .;1 x 32;8 q21;"carbonic anhydrase 3 [Source:HGNC Symbol;Acc:HGNC:1374]"
202661_at;422;202661_at;;0	310860458;0	269987416;0	555357097;-0	309863678;0	605122783;4	925870406;6.76884243100417e-06 .;1 x 40;12 p11;
202035_s_at;11;202035_s_at;SFRP1;0	128984877;0	231022484;0	973304524;-0	128984877;0	603761945;4	908427014;7.16192008165528e-06 .;1 x 31;8 p11;"secreted frizzled related protein 1 [Source:HGNC Symbol;Acc:HGNC:10776]"
1563173_at;38;1563173_at;;0	154079125;0	207011352;0	835133973;-0	154046216;0	601824954;4	883714744;7.75764399896239e-06 .;1 x 32; ;
241368_at;806;241368_at;PLIN5;0	498203476;0	186456674;0	413677746;-0	419562981;0	601799727;4	883393801;7.76569390759096e-06 .;1 x 36;19 p13;"perilipin 5 [Source:HGNC Symbol;Acc:HGNC:33196]"
228574_at;318;228574_at;TMTC2;1	000058403;0	25992466;0	600701097;-0	688014332;0	601641075;4	88137586;7.81649720660305e-06 .;1 x 37;12 q21;"transmembrane and tetratricopeptide repeat containing 2 [Source:HGNC Symbol;Acc:HGNC:25440]"
1560908_at;180;1560908_at;;0	73162409;0	19419145;0	671048504;-0	431817516;0	601507302;4	879675062;7.85957074944665e-06 .;1 x 32; ;
209293_x_at;700;209293_x_at;ID4;1	187559911;0	243838746;0	460752778;-0	516742599;0	600670386;4	869049074;8.13403153199221e-06 .;1 x 40;6 p22;"inhibitor of DNA binding 4	HLH protein [Source:HGNC Symbol;Acc:HGNC:5363]"
1565935_at;320;1565935_at;;0	365780713;0	195402564;0	600079918;-0	365780713;0	600629997;4	868536904;8.14749672328752e-06 .;1 x 31; ;
227502_at;231;227502_at;;0	710029783;0	241436575;0	642130444;-0	575727517;0	599455564;4	853669484;8.54809823613856e-06 .;1 x 36;CHR_HSCHR7_1_CTG6 ;
243731_at;633;243731_at;;0	056506004;0	114847702;0	479947372;-0	056506004;0	598328865;4	839452341;8.94932708550567e-06 .;1 x 31;19 q13;
219564_at;440;219564_at;KCNJ16;1	483844929;0	270409947;0	549978926;-0	640489812;0	597754319;4	832219722;9.16051347688018e-06 .;1 x 40;17 q24;"potassium voltage-gated channel subfamily J member 16 [Source:HGNC Symbol;Acc:HGNC:6262]"
218975_at;665;218975_at;COL5A3;0	659221103;0	333219288;0	470526398;-0	637290646;0	597713254;4	831703222;9.17578148318388e-06 .;1 x 40;19 p13;"collagen type V alpha 3 chain [Source:HGNC Symbol;Acc:HGNC:14864]"
242296_x_at;99;242296_x_at;;0	270148177;0	225449162;0	73670153;-0	250849826;0	597579902;4	830026378;9.22552301840796e-06 .;1 x 32; ;
203504_s_at;574;203504_s_at;ABCA1;0	575186688;0	251354268;0	500816302;-0	536635958;0	596995153;4	822680784;9.4465730804405e-06 .;1 x 38;9 q31;"ATP binding cassette subfamily A member 1 [Source:HGNC Symbol;Acc:HGNC:29]"
213722_at;540;213722_at;SOX2;0	685305893;0	270348261;0	514404511;-0	657878735;0	596835696;4	820679763;9.50768928820178e-06 .;1 x 40;3 q26;"SRY-box 2 [Source:HGNC Symbol;Acc:HGNC:11195]"
200831_s_at;987;200831_s_at;SCD;1	944809855;0	195388062;0	297178543;-0	652776248;0	596819319;4	820474299;9.51398670412384e-06 .;1 x 38;10 q24;"stearoyl-CoA desaturase [Source:HGNC Symbol;Acc:HGNC:10571]"
234744_x_at;990;234744_x_at;;0	574038736;0	210775096;0	293192663;-0	533499993;0	596724571;4	819285783;9.55049518869266e-06 .;1 x 37; ;
1561170_at;146;1561170_at;;0	148264079;0	190648266;0	696442656;-0	148264079;0	595309086;4	801567186;1.01114329422725e-05 .;1 x 32;15 q13;
215202_at;832;215202_at;;0	153718619;0	161531738;0	402690789;-0	153718619;0	594994072;4	797633385;1.02403082014035e-05 .;1 x 34;22 q11;
1568686_at;496;1568686_at;ATP8B5P;0	04983804;0	11047133;0	530228199;-0	04983804;0	594802975;4	795248688;1.03192200486824e-05 .;1 x 30;9 p13;"ATPase phospholipid transporting 8B5	pseudogene [Source:HGNC Symbol;Acc:HGNC:27245]"
220905_at;792;220905_at;HERPUD2;1	017451938;0	174420036;0	417257823;-0	500668034;0	593877628;4	783719058;1.07092799888076e-05 .;2 x 35;7 p14;"HERPUD family member 2 [Source:HGNC Symbol;Acc:HGNC:21915]"
227252_at;548;227252_at;LRP10;0	809003215;0	258232646;0	50994906;-0	520025243;0	593738137;4	781983579;1.07692377585566e-05 .;2 x 40;14 q11;"LDL receptor related protein 10 [Source:HGNC Symbol;Acc:HGNC:14553]"
34187_at;790;34187_at;;0	601591251;0	168344306;0	417943008;-0	45179811;0	593388671;4	777638605;1.09208035836694e-05 .;1 x 35;12 q22;"RNA binding motif single stranded interacting protein 2 pseudogene 1 [Source:HGNC Symbol;Acc:HGNC:30994]"
239710_at;635;239710_at;FIGN;0	87439343;0	259592332;0	478587204;-0	800483112;0	593216222;4	775496067;1.09963136206703e-05 .;1 x 39;2 q24;"fidgetin	microtubule severing factor [Source:HGNC Symbol;Acc:HGNC:13285]"
204273_at;573;204273_at;EDNRB;1	633400466;0	304561209;0	500832189;-0	976019588;0	592804002;4	77037865;1.11787561276611e-05 .;1 x 40;13 q22;"endothelin receptor type B [Source:HGNC Symbol;Acc:HGNC:3180]"
203702_s_at;626;203702_s_at;TTLL4;0	442191034;0	240594356;0	482991272;-0	438188654;0	591224016;4	750817675;1.19040267936299e-05 .;2 x 40;2 q35;"tubulin tyrosine ligase like 4 [Source:HGNC Symbol;Acc:HGNC:28976]"
1556607_at;127;1556607_at;EHD4;0	198973748;0	19393804;0	714103555;-0	198396734;0	590671026;4	743991312;1.21678852993412e-05 .;1 x 31;15 q15;"EH domain containing 4 [Source:HGNC Symbol;Acc:HGNC:3245]"
207416_s_at;681;207416_s_at;;0	698017447;0	190714599;0	465753758;-0	368525869;0	59050785;4	741978945;1.22467624799061e-05 .;1 x 32;16 q22;
242331_x_at;62;242331_x_at;FRG1;0	731621057;0	211174058;0	796325404;-0	440713295;0	589958485;4	735210503;1.25157728100289e-05 .;1 x 31;4 q35;"FSHD region gene 1 [Source:HGNC Symbol;Acc:HGNC:3954]"
230865_at;476;230865_at;LIX1;1	280521997;0	260594885;0	539839545;-0	750468222;0	589613169;4	730961195;1.26876251620445e-05 .;2 x 40;5 q15;"limb and CNS expressed 1 [Source:HGNC Symbol;Acc:HGNC:18581]"
233847_x_at;135;233847_x_at;;0	128286808;0	159462257;0	707348277;-0	128251519;0	588748789;4	720341949;1.31273170742574e-05 .;1 x 31; ;
228758_at;280;228758_at;;0	788184227;0	310346713;0	61560123;-0	545120688;0	588069619;4	712015478;1.34825382736015e-05 .;2 x 40; ;
244639_at;181;244639_at;;0	308582887;0	251138356;0	67095314;-0	303744459;0	587270592;4	702239085;1.3911705545766e-05 .;1 x 32; ;
209628_at;102;209628_at;NXT2;0	800567336;0	291514683;0	735266777;-0	585246116;0	587127944;4	700495947;1.39896263704475e-05 .;2 x 40;X q23;"nuclear transport factor 2 like export factor 2 [Source:HGNC Symbol;Acc:HGNC:18151]"
228312_at;671;228312_at;PI16;0	439641563;0	21632542;0	469282986;-0	395662882;0	586475022;4	69252583;1.43514090500396e-05 .;1 x 35;6 p21;"peptidase inhibitor 16 [Source:HGNC Symbol;Acc:HGNC:21245]"
207914_x_at;946;207914_x_at;EVX1;0	796012687;0	186756966;0	333135315;-0	505948422;0	585882888;4	685309816;1.46868932321409e-05 .;2 x 35;7 p15;"even-skipped homeobox 1 [Source:HGNC Symbol;Acc:HGNC:3506]"
241674_s_at;378;241674_s_at;;0	0467703;0	142107113;0	576241657;-0	0467703;0	585784014;4	684106004;1.47436065084383e-05 .;1 x 31; ;
1569300_at;833;1569300_at;MFAP3L;0	102671642;0	132377963;0	402230158;-0	102671642;0	585732291;4	683476396;1.47733540386552e-05 .;1 x 33;4 q33;"microfibril associated protein 3 like [Source:HGNC Symbol;Acc:HGNC:29083]"
1556944_at;343;1556944_at;;0	277585673;0	195496905;0	589645726;-0	264385133;0	585353992;4	678874109;1.49926020935887e-05 .;1 x 32;1 q23;
1569192_at;412;1569192_at;;0	199504315;0	212001556;0	559274502;-0	199304572;0	584807169;4	672229816;1.53147868089398e-05 .;1 x 33; ;
1561926_at;740;1561926_at;;0	26130998;0	203391475;0	445343929;-0	260139432;0	58446028;4	668019884;1.55224432696333e-05 .;1 x 32; ;
1558009_at;587;1558009_at;SLC1A2;1	877573059;0	323961356;0	495449615;-1	066570047;0	583888359;4	661087396;1.58704422021927e-05 .;1 x 40;11 p13;"solute carrier family 1 member 2 [Source:HGNC Symbol;Acc:HGNC:10940]"
200686_s_at;859;200686_s_at;SRSF11;2	308290979;0	13359676;0	392007652;-0	183869384;0	583330569;4	654336328;1.6216705225669e-05 .;3 x 33;1 p31;"serine and arginine rich splicing factor 11 [Source:HGNC Symbol;Acc:HGNC:10782]"
227991_x_at;958;227991_x_at;ZBTB43;1	152080101;0	150720012;0	323515087;-0	387623555;0	583146206;4	652107143;1.63326639710526e-05 .;2 x 35;9 q33;"zinc finger and BTB domain containing 43 [Source:HGNC Symbol;Acc:HGNC:17908]"
1552325_at;307;1552325_at;CFAP53;0	317200441;0	214128551;0	603921665;-0	31645812;0	58294493;4	649674691;1.64601268084485e-05 .;1 x 33;18 q21;"cilia and flagella associated protein 53 [Source:HGNC Symbol;Acc:HGNC:26530]"
209309_at;45;209309_at;AZGP1;0	081054036;0	189021164;0	823120924;-0	081054036;0	582759795;4	647438458;1.65781703211909e-05 .;1 x 31;7 q22;"alpha-2-glycoprotein 1	zinc-binding [Source:HGNC Symbol;Acc:HGNC:910]"
205255_x_at;881;205255_x_at;TCF7;1	342459524;0	129568226;0	378439495;-0	201984333;0	582670194;4	646356564;1.66355784350092e-05 .;2 x 33;5 q31;"transcription factor 7 [Source:HGNC Symbol;Acc:HGNC:11639]"
233808_at;42;233808_at;;0	074629814;0	176999925;0	827987276;-0	074629814;0	581595413;4	633399001;1.7338517553811e-05 .;1 x 33; ;
230615_at;316;230615_at;DUOXA2;0	34244125;0	240921425;0	601528246;-0	341649832;0	58135518;4	630507775;1.74993056489825e-05 .;1 x 33;15 q21;"dual oxidase maturation factor 2 [Source:HGNC Symbol;Acc:HGNC:32698]"
210066_s_at;311;210066_s_at;AQP4;1	248659125;0	415653531;0	603341658;-1	248657992;0	579926324;4	613349069;1.84841488577447e-05 .;1 x 40;18 q11;"aquaporin 4 [Source:HGNC Symbol;Acc:HGNC:637]"
201261_x_at;754;201261_x_at;BGN;0	925056498;0	181506028;0	438324398;-0	302584044;0	579760679;4	611364043;1.86015393290884e-05 .;1 x 34;X q28;"biglycan [Source:HGNC Symbol;Acc:HGNC:1044]"
242436_at;646;242436_at;PLEKHH2;0	340156338;0	216437651;0	476587266;-0	294851032;0	579696704;4	610597626;1.86470595164856e-05 .;1 x 36;2 p21;"pleckstrin homology	MyTH4 and FERM domain containing H2 [Source:HGNC Symbol;Acc:HGNC:30506]"
1562947_x_at;32;1562947_x_at;;0	349050243;0	224577759;0	863396619;-0	304643157;0	579233644;4	605054;1.89795902141299e-05 .;1 x 32; ;
210605_s_at;693;210605_s_at;MFGE8;1	035395989;0	245009511;0	463075536;-0	588501691;0	578573862;4	597166856;1.94627598262276e-05 .;1 x 39;15 q26;"milk fat globule-EGF factor 8 protein [Source:HGNC Symbol;Acc:HGNC:7036]"
221606_s_at;994;221606_s_at;HMGN5;0	966927727;0	146256013;0	288878296;-0	437360603;0	577629002;4	585895458;2.01742911836167e-05 .;1 x 36;X q21;"high mobility group nucleosome binding domain 5 [Source:HGNC Symbol;Acc:HGNC:8013]"
234801_s_at;15;234801_s_at;;0	22479102;0	305755307;0	920428986;-0	22479102;0	577492842;4	584273462;2.02787644114633e-05 .;2 x 40; ;
219416_at;890;219416_at;SCARA3;0	929980004;0	227958592;0	375676215;-0	486580776;0	577278519;4	581721526;2.04442122768711e-05 .;1 x 40;8 p21;"scavenger receptor class A member 3 [Source:HGNC Symbol;Acc:HGNC:19000]"
1569537_at;632;1569537_at;;0	093349344;0	139854771;0	480160353;-0	093349344;0	576827237;4	576352764;2.07966223942924e-05 .;2 x 34; ;
228844_at;19;228844_at;SLC13A5;0	388978823;0	358027867;0	895721693;-0	388978823;0	57674907;4	575423467;2.08582251460809e-05 .;1 x 40;17 p13;"solute carrier family 13 member 5 [Source:HGNC Symbol;Acc:HGNC:23089]"
1562997_a_at;857;1562997_a_at;CD200;0	102868414;0	135397173;0	392100545;-0	102868414;0	576480905;4	572236813;2.1070831279113e-05 .;1 x 33;3 q13;"CD200 molecule [Source:HGNC Symbol;Acc:HGNC:7203]"
242377_x_at;1007;242377_x_at;;1	350781061;0	126540295;0	267761775;-0	274690115;0	575511;4	560729701;2.18564271071697e-05 .;2 x 34; ;
202040_s_at;800;202040_s_at;KDM5A;1	160427827;0	18711844;0	415200129;-0	317453116;0	575456869;4	560088336;2.1901049671591e-05 .;2 x 35;12 p13;"lysine demethylase 5A [Source:HGNC Symbol;Acc:HGNC:9886]"
241088_at;708;241088_at;;0	09063706;0	134908303;0	457783371;-0	09063706;0	575199372;4	557038609;2.21144597345457e-05 .;2 x 33; ;
228028_at;126;228028_at;GAREM2;0	745542243;0	29828512;0	714337625;-0	54422391;0	575021946;4	55493841;2.2262610763546e-05 .;1 x 40;2 p23;"GRB2 associated regulator of MAPK1 subtype 2 [Source:HGNC Symbol;Acc:HGNC:27172]"
206734_at;865;206734_at;JRKL;1	030095194;0	133538425;0	390311133;-0	304725296;0	574820541;4	552555523;2.24318833763615e-05 .;2 x 36;11 q21;"JRK like [Source:HGNC Symbol;Acc:HGNC:6200]"
202252_at;982;202252_at;RAB13;1	595842083;0	176528946;0	303280513;-0	349675244;0	573595621;4	538089688;2.34869438711094e-05 .;1 x 37;1 q21;"RAB13	member RAS oncogene family [Source:HGNC Symbol;Acc:HGNC:9762]"
1565446_at;724;1565446_at;;0	305213225;0	179217428;0	451073049;-0	301085809;0	573566424;4	537745439;2.35126359031668e-05 .;1 x 33; ;
203658_at;458;203658_at;SLC25A20;0	553746232;0	295873217;0	545781545;-0	549073657;0	572923519;4	530171729;2.40849100590079e-05 .;1 x 40;3 p21;"solute carrier family 25 member 20 [Source:HGNC Symbol;Acc:HGNC:1421]"
202563_at;237;202563_at;ERG28;0	258313832;0	216080942;0	637095837;-0	256222662;0	572507573;4	525278325;2.44619052852668e-05 .;1 x 36;14 q24;"ergosterol biosynthesis 28 homolog [Source:HGNC Symbol;Acc:HGNC:1187]"
1566129_at;260;1566129_at;;0	140227528;0	185785258;0	625813631;-0	140227528;0	571763473;4	516537313;2.51497901970765e-05 .;1 x 33; ;
1554354_at;332;1554354_at;SIAE;0	312514373;0	205841179;0	593586572;-0	312463148;0	571560061;4	514150701;2.53408833403856e-05 .;1 x 34;11 q24;"sialic acid acetylesterase [Source:HGNC Symbol;Acc:HGNC:18187]"
210739_x_at;242;210739_x_at;SLC4A4;0	676048752;0	314148864;0	631148287;-0	665029663;0	571495277;4	513390854;2.54020219186968e-05 .;1 x 40;4 q13;"solute carrier family 4 member 4 [Source:HGNC Symbol;Acc:HGNC:11030]"
234650_at;336;234650_at;;0	207774673;0	197014116;0	592636658;-0	206295069;0	571359754;4	511801725;2.55303540410701e-05 .;1 x 35; ;
1562459_at;786;1562459_at;;0	143568146;0	163699098;0	419329646;-0	143568146;0	571254731;4	510570611;2.56302113317286e-05 .;1 x 33;5 q11;"RNA	U6 small nuclear 480	pseudogene [Source:HGNC Symbol;Acc:HGNC:47443]"
201445_at;766;201445_at;CNN3;1	536399746;0	261071066;0	431800612;-0	627853421;0	571105676;4	508823905;2.57725468144621e-05 .;2 x 40;1 p21;"calponin 3 [Source:HGNC Symbol;Acc:HGNC:2157]"
241559_at;68;241559_at;;0	077803983;0	160234143;0	788998513;-0	077803983;0	570866193;4	506018892;2.60027457978929e-05 .;1 x 30; ;
1557285_at;895;1557285_at;;0	356214726;0	197073654;0	371840855;-0	346897136;0	569669489;4	492027716;2.7181422997069e-05 .;1 x 33; ;
1559492_at;713;1559492_at;;0	170648173;0	15822265;0	456938278;-0	167531805;0	569507007;4	490131334;2.73451625009136e-05 .;1 x 33;12 q14;
206960_at;96;206960_at;LPAR4;0	229228003;0	194653478;0	741005699;-0	229228003;0	569314563;4	487886261;2.75402599483332e-05 .;1 x 31;X q21;"lysophosphatidic acid receptor 4 [Source:HGNC Symbol;Acc:HGNC:4478]"
209600_s_at;995;209600_s_at;ACOX1;0	924896088;0	15039484;0	288473934;-0	345772523;0	568857312;4	482556316;2.80089177109311e-05 .;2 x 36;17 q25;"acyl-CoA oxidase 1 [Source:HGNC Symbol;Acc:HGNC:119]"
242427_at;125;242427_at;WAC;0	259129095;0	216274667;0	714741436;-0	259129095;0	56878726;4	481740299;2.80813564126348e-05 .;1 x 32;10 p12;"WW domain containing adaptor with coiled-coil [Source:HGNC Symbol;Acc:HGNC:17327]"
1561415_at;140;1561415_at;;0	112532977;0	182258151;0	702631539;-0	112532977;0	568775107;4	481598749;2.80939406849257e-05 .;1 x 31; ;
233193_x_at;285;233193_x_at;INTS4;0	948365991;0	298419771;0	612066757;-0	647640392;0	56870642;4	480798787;2.81651637539237e-05 .;1 x 37;11 q14;"integrator complex subunit 4 [Source:HGNC Symbol;Acc:HGNC:25048]"
226933_s_at;325;226933_s_at;;0	722750458;0	310971118;0	597693009;-0	670403751;0	567916547;4	471609588;2.89961134752881e-05 .;1 x 40; ;
227081_at;244;227081_at;DNALI1;0	28098248;0	253010818;0	630309942;-0	28098248;0	567294468;4	464385306;2.9666215494939e-05 .;1 x 39;1 p34;"dynein axonemal light intermediate chain 1 [Source:HGNC Symbol;Acc:HGNC:14353]"
1561765_at;90;1561765_at;;0	070127738;0	140174621;0	747184978;-0	070127738;0	566928943;4	460145665;3.00665161427904e-05 .;1 x 30; ;
1561775_at;89;1561775_at;;0	166645292;0	221042275;0	747716155;-0	166645292;0	566544788;4	455694142;3.04925206930928e-05 .;1 x 32; ;
244290_at;931;244290_at;;0	477730393;0	176261576;0	346012835;-0	387352636;0	566504195;4	455223998;3.05378567172498e-05 .;1 x 35; ;
232397_at;283;232397_at;LOC101927482;0	036726426;0	114453874;0	612601784;-0	036726426;0	566294048;4	452790905;3.0773538100437e-05 .;1 x 30;2 q32;
210926_at;915;210926_at;;1	170334241;0	1465242;0	359897331;-0	349680105;0	565065482;4	438592034;3.21848900343147e-05 .;1 x 33;2 q21;"POTE ankyrin domain family member K	pseudogene [Source:HGNC Symbol;Acc:HGNC:30182]"
243636_s_at;836;243636_s_at;;0	463718981;0	212095442;0	401085736;-0	447246153;0	564913684;4	436840674;3.2363308499761e-05 .;1 x 36; ;
213900_at;39;213900_at;FAM189A2;0	622274571;0	285346401;0	831684563;-0	587607552;0	564819195;4	435750855;3.24748217797044e-05 .;1 x 40;9 q21;"family with sequence similarity 189 member A2 [Source:HGNC Symbol;Acc:HGNC:24820]"
217533_x_at;518;217533_x_at;;0	300027119;0	20360677;0	52239684;-0	296425788;0	564603851;4	433268057;3.27302763114545e-05 .;1 x 34; ;
232954_at;856;232954_at;;0	614241699;0	197244941;0	392529626;-0	395749478;0	564424575;4	431202127;3.29443393469742e-05 .;1 x 36; ;
1560369_at;317;1560369_at;;0	12761281;0	156458373;0	601306628;-0	12761281;0	562445996;4	40846235;3.53930824212867e-05 .;1 x 30; ;
211078_s_at;723;211078_s_at;STK3;0	107685995;0	148733056;0	452532001;-0	107685995;0	562216137;4	405827788;3.56880597446319e-05 .;1 x 32;8 q22;"serine/threonine kinase 3 [Source:HGNC Symbol;Acc:HGNC:11406]"
222720_x_at;850;222720_x_at;C1orf27;0	806837591;0	161539842;0	395481182;-0	489088707;0	561895003;4	402149565;3.61039205061253e-05 .;1 x 35;1 q31;"chromosome 1 open reading frame 27 [Source:HGNC Symbol;Acc:HGNC:24299]"
218636_s_at;805;218636_s_at;MAN1B1;0	935310559;0	149476327;0	414113374;-0	377119946;0	561099471;4	393050179;3.71531962102267e-05 .;3 x 32;9 q34;"mannosidase alpha class 1B member 1 [Source:HGNC Symbol;Acc:HGNC:6823]"
228440_at;639;228440_at;;0	305226199;0	2147384;0	478172258;-0	305216127;0	560892574;4	390686583;3.74305981634127e-05 .;1 x 33;4 q31;
204264_at;880;204264_at;CPT2;0	363965466;0	199872033;0	38132509;-0	344483391;0	560715079;4	388659829;3.76700811020036e-05 .;1 x 37;1 p32;"carnitine palmitoyltransferase 2 [Source:HGNC Symbol;Acc:HGNC:2330]"
235031_at;379;235031_at;;0	104724192;0	165452305;0	575700945;-0	104724192;0	560630266;4	387691689;3.77850060755414e-05 .;1 x 32; ;
212916_at;676;212916_at;PHF8;0	519421043;0	222126391;0	467715559;-0	410176579;0	560465726;4	385814044;3.80088749152296e-05 .;1 x 35;X p11;"PHD finger protein 8 [Source:HGNC Symbol;Acc:HGNC:20672]"
1563680_at;331;1563680_at;;0	206577438;0	189731294;0	594084074;-0	205779528;0	559745597;4	377605213;3.90029441723616e-05 .;1 x 31;2 p11;
1559849_at;424;1559849_at;ZNF605;0	156029625;0	179049602;0	554058785;-0	155968565;0	559729455;4	377421379;3.9025494819267e-05 .;1 x 32;12 q24;"zinc finger protein 605 [Source:HGNC Symbol;Acc:HGNC:28068]"
211708_s_at;31;211708_s_at;SCD;0	640890359;0	384004638;0	865953919;-0	640854996;0	559573748;4	375648425;3.92436369615057e-05 .;1 x 39;10 q24;"stearoyl-CoA desaturase [Source:HGNC Symbol;Acc:HGNC:10571]"
236163_at;337;236163_at;LIX1;0	254912051;0	274320382;0	592046709;-0	254912051;0	559348857;4	373088904;3.95606638270429e-05 .;2 x 40;5 q15;"limb and CNS expressed 1 [Source:HGNC Symbol;Acc:HGNC:18581]"
244298_at;51;244298_at;;0	441715328;0	233223352;0	815636726;-0	441702565;0	557892632;4	356549297;4.16705647137139e-05 .;1 x 31; ;
232261_at;115;232261_at;;0	099345567;0	157415885;0	720747105;-0	099345567;0	557169358;4	348356203;4.27561207145821e-05 .;1 x 30; ;
1560997_at;383;1560997_at;;0	322643718;0	193477064;0	573624711;-0	286353867;0	556556137;4	341421004;4.36965909194065e-05 .;1 x 32; ;
239900_x_at;471;239900_x_at;;0	766877403;0	193077758;0	54039498;-0	283978599;0	556219292;4	337615842;4.42211682643023e-05 .;1 x 34; ;
1568925_at;826;1568925_at;MYLK3;0	502080364;0	18987206;0	404931763;-0	384003643;0	555966984;4	334767683;4.46178393258556e-05 .;1 x 35;16 q11;"myosin light chain kinase 3 [Source:HGNC Symbol;Acc:HGNC:29826]"
209113_s_at;714;209113_s_at;HMG20B;0	298627184;0	211633582;0	456434441;-0	291859122;0	555585368;4	330463132;4.52239586660186e-05 .;1 x 38;19 p13;"high mobility group 20B [Source:HGNC Symbol;Acc:HGNC:5002]"
236982_at;523;236982_at;;0	09860855;0	151625029;0	520947047;-0	09860855;0	555389723;4	328257827;4.55375974556249e-05 .;1 x 32; ;
1570308_at;101;1570308_at;;0	048747871;0	158422859;0	735925247;-0	048747871;0	554631167;4	319717244;4.67724337886999e-05 .;1 x 31; ;
227148_at;472;227148_at;PLEKHH2;0	604053687;0	215400016;0	540367822;-0	604053687;0	554130554;4	314089365;4.76039706700515e-05 .;1 x 35;2 p21;"pleckstrin homology	MyTH4 and FERM domain containing H2 [Source:HGNC Symbol;Acc:HGNC:30506]"
236716_at;609;236716_at;;0	76773861;0	195973;0	487992828;-0	617006333;0	553610096;4	308245546;4.84827056558279e-05 .;1 x 36;4 p12;
241443_at;655;241443_at;ADI1;0	254653268;0	20848272;0	473476539;-0	254653268;0	553532342;4	307373135;4.8615242981942e-05 .;1 x 35;CHR_HSCHR2_1_CTG1 ;"acireductone dioxygenase 1 [Source:HGNC Symbol;Acc:HGNC:30576]"
244842_x_at;818;244842_x_at;;1	078643968;0	167305474;0	409392919;-0	310772414;0	553427828;4	306200722;4.87939150402017e-05 .;2 x 34;10 q26;
1556713_at;186;1556713_at;;0	060421018;0	132759458;0	667923087;-0	060421018;0	553299631;4	304763038;4.90138895723469e-05 .;1 x 30; ;
240587_x_at;107;240587_x_at;;0	302682176;0	242973929;0	730943445;-0	302682176;0	552853333;4	299761428;4.97867453286283e-05 .;1 x 33; ;
238336_s_at;281;238336_s_at;;0	202066286;0	177043627;0	613959422;-0	202066286;0	552559746;4	29647413;5.03011763908212e-05 .;1 x 31; ;
201353_s_at;546;201353_s_at;BAZ2A;0	787612909;0	201716175;0	510937969;-0	618806473;0	552552297;4	296390755;5.03142910491805e-05 .;2 x 35;12 q13;"bromodomain adjacent to zinc finger domain 2A [Source:HGNC Symbol;Acc:HGNC:962]"
1569543_at;499;1569543_at;;0	48828781;0	206563897;0	52898425;-0	386897651;0	552348123;4	294106015;5.06749793718342e-05 .;1 x 35; ;
211627_x_at;616;211627_x_at;;0	326725518;0	210182606;0	486880469;-0	326725518;0	551673321;4	286562778;5.18838518612785e-05 .;1 x 35; ;
241061_at;542;241061_at;;0	046022489;0	112443586;0	514195506;-0	046022489;0	551668052;4	286503935;5.18933920086173e-05 .;1 x 31; ;
238545_at;400;238545_at;BRD7;0	123755254;0	157943109;0	564013405;-0	123640044;0	551430956;4	283856469;5.23243943642004e-05 .;3 x 32;16 q12;"bromodomain containing 7 [Source:HGNC Symbol;Acc:HGNC:14310]"
230341_x_at;840;230341_x_at;ADAMTS10;1	199882649;0	152394049;0	399718831;-0	360023159;0	551213117;4	281425356;5.27232540499245e-05 .;2 x 34;19 p13;"ADAM metallopeptidase with thrombospondin type 1 motif 10 [Source:HGNC Symbol;Acc:HGNC:13201]"
232395_x_at;249;232395_x_at;AGBL3;0	264856379;0	205393839;0	629266292;-0	264855617;0	550814878;4	276984206;5.34595735679488e-05 .;3 x 33;7 q33;"ATP/GTP binding protein like 3 [Source:HGNC Symbol;Acc:HGNC:27981]"
208621_s_at;297;208621_s_at;EZR;0	844717036;0	390447789;0	607264203;-0	844717036;0	550497147;4	273443891;5.40537267395003e-05 .;1 x 40;6 q25;"ezrin [Source:HGNC Symbol;Acc:HGNC:12691]"
42361_g_at;430;42361_g_at;CCHCR1;0	103536546;0	127565378;0	553178495;-0	103536546;0	550048817;4	268452891;5.49023108292745e-05 .;1 x 30;CHR_HSCHR6_MHC_MCF_CTG1 ;"coiled-coil alpha-helical rod protein 1 [Source:HGNC Symbol;Acc:HGNC:13930]"
238384_x_at;469;238384_x_at;;0	120200898;0	144613509;0	54156638;-0	119488501;0	549733646;4	264947455;5.5506079720824e-05 .;1 x 30; ;
207986_x_at;970;207986_x_at;CYB561;1	180311757;0	113560702;0	315165833;-0	223963413;0	549660828;4	264137915;5.56464323132611e-05 .;3 x 34;17 q23;"cytochrome b561 [Source:HGNC Symbol;Acc:HGNC:2571]"
1565876_x_at;673;1565876_x_at;;0	332747627;0	209381106;0	469133959;-0	332747044;0	549540655;4	262802225;5.58787631164126e-05 .;1 x 33; ;
215698_at;116;215698_at;KDM5A;0	471162226;0	259967625;0	720504258;-0	467848293;0	549495526;4	262300727;5.59662385978266e-05 .;1 x 34;12 p13;"lysine demethylase 5A [Source:HGNC Symbol;Acc:HGNC:9886]"
241306_at;34;241306_at;;0	10763802;0	189057967;0	851328989;-0	10763802;0	548786112;4	25442435;5.73577720357488e-05 .;1 x 30; ;
225692_at;983;225692_at;CAMTA1;1	687192256;0	143985703;0	30124785;-0	2754715;0	548775083;4	254301997;5.73796526261994e-05 .;1 x 38;1 p36;"calmodulin binding transcription activator 1 [Source:HGNC Symbol;Acc:HGNC:18806]"
1562365_at;24;1562365_at;LOC286177;0	226824426;0	241936326;0	884539178;-0	226824426;0	548761973;4	254156569;5.74056704385484e-05 .;1 x 31;CHR_HSCHR8_1_CTG6 ;
222071_s_at;448;222071_s_at;SLCO4C1;0	360241148;0	23211159;0	548040912;-0	35998067;0	548446087;4	25065383;5.80358188364549e-05 .;1 x 37;5 q21;"solute carrier organic anion transporter family member 4C1 [Source:HGNC Symbol;Acc:HGNC:23612]"
210713_at;481;210713_at;;0	095489909;0	14818242;0	537747453;-0	095489909;0	547917563;4	244799043;5.91042152742194e-05 .;1 x 30; ;
241700_at;435;241700_at;ZFHX4;0	219304421;0	191797656;0	551853088;-0	21033097;0	547419911;4	239292891;6.01264992410311e-05 .;1 x 38;8 q21;"zinc finger homeobox 4 [Source:HGNC Symbol;Acc:HGNC:30939]"
1569054_at;123;1569054_at;SLC1A3;0	181023859;0	273269872;0	715599113;-0	181023859;0	546172279;4	225516941;6.27603738547755e-05 .;2 x 40;5 p13;"solute carrier family 1 member 3 [Source:HGNC Symbol;Acc:HGNC:10941]"
1564705_at;653;1564705_at;GLS2;0	224991444;0	207170719;0	474461147;-0	222808616;0	545691401;4	220217962;6.38032096460517e-05 .;2 x 34;12 q13;"glutaminase 2 [Source:HGNC Symbol;Acc:HGNC:29570]"
233869_x_at;860;233869_x_at;;0	729278014;0	208630672;0	391914974;-0	53385429;0	545485713;4	217953222;6.42540491851973e-05 .;2 x 35; ;
234517_at;234;234517_at;;0	520836349;0	227325663;0	638987571;-0	461800943;0	545123219;4	213964593;6.50556310840544e-05 .;1 x 32; ;
1562921_at;282;1562921_at;;0	081871941;0	147683364;0	613921606;-0	081871941;0	544925804;4	211793794;6.54959811117184e-05 .;1 x 30; ;
228433_at;966;228433_at;;1	071143568;0	164223328;0	318103368;-0	317943486;0	544892128;4	21142358;6.55713692179205e-05 .;2 x 36; ;
239623_at;613;239623_at;C5orf63;0	201548753;0	178974027;0	487144759;-0	200791563;0	544598798;4	208200185;6.62313498034361e-05 .;2 x 32;5 q23;"chromosome 5 open reading frame 63 [Source:HGNC Symbol;Acc:HGNC:40051]"
209672_s_at;537;209672_s_at;MIOS;0	176123824;0	165956586;0	515647228;-0	175683275;0	544231517;4	204167229;6.7066216668632e-05 .;2 x 31;7 p21;"meiosis regulator for oocyte development [Source:HGNC Symbol;Acc:HGNC:21905]"
217663_at;572;217663_at;ZNF234;0	197391154;0	194951684;0	501050609;-0	197391154;0	544136413;4	203123497;6.7283947517649e-05 .;1 x 32;19 q13;"zinc finger protein 234 [Source:HGNC Symbol;Acc:HGNC:13027]"
243768_at;935;243768_at;;1	538099566;0	170221189;0	342839324;-0	431422905;0	5440344;4	202004188;6.75182106453232e-05 .;3 x 34;6 q14;"RNA	U6 small nuclear 1016	pseudogene [Source:HGNC Symbol;Acc:HGNC:47979]"
232559_at;321;232559_at;;0	498605501;0	225309327;0	599649447;-0	466030179;0	543785423;4	199273481;6.80930704105576e-05 .;1 x 33; ;
1563863_x_at;577;1563863_x_at;TCEANC;0	168260934;0	190568882;0	500522943;-0	168260934;0	543438173;4	195467584;6.8902245970115e-05 .;1 x 32;X p22;"transcription elongation factor A N-terminal and central domain containing [Source:HGNC Symbol;Acc:HGNC:28277]"
225925_s_at;872;225925_s_at;USP48;1	259555526;0	130529874;0	387218531;-0	234571944;0	54187034;4	178321883;7.26654008665895e-05 .;3 x 32;1 p36;"ubiquitin specific peptidase 48 [Source:HGNC Symbol;Acc:HGNC:18533]"
244682_at;294;244682_at;CAMSAP1;0	271816307;0	244975923;0	610078876;-0	266711788;0	541157836;4	170550439;7.44363847451357e-05 .;2 x 34;9 q34;"calmodulin regulated spectrin associated protein 1 [Source:HGNC Symbol;Acc:HGNC:19946]"
232015_at;210;232015_at;GAREM2;0	33908576;0	311473997;0	656048411;-0	33908576;0	540870175;4	16741645;7.51624127670603e-05 .;1 x 40;2 p23;"GRB2 associated regulator of MAPK1 subtype 2 [Source:HGNC Symbol;Acc:HGNC:27172]"
1562528_at;44;1562528_at;;0	326802026;0	231926947;0	824071439;-0	308512795;0	540295646;4	161163307;7.66317152766094e-05 .;1 x 31; ;
36888_at;70;36888_at;HAUS5;0	144156559;0	203969132;0	775902566;-0	144156559;0	540215289;4	160289368;7.6839281750618e-05 .;1 x 32;19 q13;"HAUS augmin like complex subunit 5 [Source:HGNC Symbol;Acc:HGNC:29130]"
233004_x_at;279;233004_x_at;;0	599211438;0	217614208;0	61619971;-0	532355451;0	540054779;4	158544178;7.72554169861106e-05 .;1 x 36; ;
205222_at;261;205222_at;EHHADH;0	265967088;0	233659608;0	625521909;-0	262850721;0	539845212;4	156266563;7.78018121122548e-05 .;1 x 32;3 q27;"enoyl-CoA hydratase and 3-hydroxyacyl CoA dehydrogenase [Source:HGNC Symbol;Acc:HGNC:3247]"
239014_at;483;239014_at;SNORD98;0	328877406;0	254348953;0	53690382;-0	325927385;0	539552217;4	153084059;7.85715999922498e-05 .;2 x 34;10 q21;"small nucleolar RNA	C/D box 98 [Source:HGNC Symbol;Acc:HGNC:32761]"
226122_at;733;226122_at;PLEKHG1;0	40633636;0	255295471;0	447837013;-0	406293032;0	53892592;4	146288385;8.02402703916627e-05 .;2 x 40;6 q25;"pleckstrin homology and RhoGEF domain containing G1 [Source:HGNC Symbol;Acc:HGNC:20884]"
228152_s_at;178;228152_s_at;DDX60L;0	109967931;0	155284276;0	67237227;-0	109967931;0	538860661;4	145580853;8.04159760459111e-05 .;1 x 30;4 q32;"DEAD-box helicase 60 like [Source:HGNC Symbol;Acc:HGNC:26429]"
215772_x_at;951;215772_x_at;SUCLG2;1	080323206;0	192327574;0	327455789;-0	379093803;0	538852942;4	145497167;8.04367829052577e-05 .;1 x 39;3 p14;"succinate-CoA ligase GDP-forming beta subunit [Source:HGNC Symbol;Acc:HGNC:11450]"
223899_at;608;223899_at;;0	698248029;0	202931192;0	488303143;-0	563945762;0	538422192;4	140829688;8.16056074565141e-05 .;1 x 33; ;
236946_at;855;236946_at;;0	435805219;0	208829907;0	392679429;-0	435166809;0	538335902;4	139895232;8.18415927875682e-05 .;1 x 36; ;
1560665_at;552;1560665_at;SCPEP1;0	051156552;0	114700841;0	507523771;-0	051156552;0	537716361;4	133191402;8.35541615181734e-05 .;1 x 30;17 q22;"serine carboxypeptidase 1 [Source:HGNC Symbol;Acc:HGNC:29507]"
223019_at;182;223019_at;FAM129B;0	5461382;0	211748931;0	6703636;-0	398767374;0	536787061;4	12315342;8.61839143750931e-05 .;1 x 31;9 q34;"family with sequence similarity 129 member B [Source:HGNC Symbol;Acc:HGNC:25282]"
215870_s_at;278;215870_s_at;PLA2G5;0	600039805;0	33150059;0	616271134;-0	599994175;0	536160328;4	116395581;8.79995482960805e-05 .;1 x 40;1 p36;"phospholipase A2 group V [Source:HGNC Symbol;Acc:HGNC:9038]"
37424_at;596;37424_at;CCHCR1;0	646856711;0	174029432;0	49377371;-0	434558469;0	536024389;4	114931059;8.83979047470174e-05 .;3 x 33;CHR_HSCHR6_MHC_MCF_CTG1 ;"coiled-coil alpha-helical rod protein 1 [Source:HGNC Symbol;Acc:HGNC:13930]"
1558608_a_at;759;1558608_a_at;;0	142380433;0	13464733;0	436112653;-0	141978655;0	535398287;4	108191626;9.02538023921373e-05 .;1 x 31; ;
211040_x_at;652;211040_x_at;GTSE1;1	122431058;0	258104302;0	475389522;-1	052200634;0	535278953;4	106908179;9.06115111749539e-05 .;1 x 35;22 q13;"G2 and S-phase expressed 1 [Source:HGNC Symbol;Acc:HGNC:13698]"
203977_at;103;203977_at;TAZ;0	363434627;0	264690278;0	73307778;-0	332264444;0	535160011;4	105629298;9.09693198135608e-05 .;1 x 34;X q28;"tafazzin [Source:HGNC Symbol;Acc:HGNC:11577]"
1559848_at;165;1559848_at;NSUN4;0	376306426;0	211019586;0	682649748;-0	353366044;0	534729019;4	100998056;9.22766058217839e-05 .;1 x 33;1 p33;"NOP2/Sun RNA methyltransferase family member 4 [Source:HGNC Symbol;Acc:HGNC:31802]"
217911_s_at;1;217911_s_at;BAG3;1	100539066;0	42650503;1	464972437;-0	834746416;0	53423093;4	095651398;9.38085830957114e-05 .;1 x 40;10 q26;"BCL2 associated athanogene 3 [Source:HGNC Symbol;Acc:HGNC:939]"
1563033_x_at;175;1563033_x_at;;0	154609107;0	197675053;0	674432921;-0	154608597;0	533245621;4	085092319;9.69071218461792e-05 .;1 x 31; ;
1569815_x_at;873;1569815_x_at;;0	396078591;0	216072094;0	386427003;-0	388591784;0	532892916;4	081318209;9.80386037032766e-05 .;1 x 35; ;
1558523_at;334;1558523_at;;0	498576296;0	308777531;0	593217839;-0	4782001;0	532392133;4	075964691;9.96656667119344e-05 .;2 x 40; ;
206061_s_at;939;206061_s_at;DICER1;1	377625;0	142968865;0	338886709;-0	319041491;0	532294368;4	074920247;9.99861464867635e-05 .;3 x 33;14 q32;"dicer 1	ribonuclease III [Source:HGNC Symbol;Acc:HGNC:17098]"
238634_x_at;376;238634_x_at;;0	328005068;0	203465219;0	578797047;-0	310791779;0	53204973;4	072307741;0.000100792170510955 .;1 x 33; ;
1564640_at;621;1564640_at;;0	176893248;0	162427645;0	484616101;-0	175407179;0	531962726;4	071378964;0.000101080241781681 .;2 x 32; ;
1568892_at;36;1568892_at;LOC100996251;0	303952428;0	249647255;0	846711652;-0	303952428;0	531917808;4	070899524;0.000101229258966717 .;1 x 31;1 p13;
240829_at;640;240829_at;;0	513199726;0	2169868;0	47781422;-0	40290899;0	5317726;4	069349962;0.000101712348919092 .;1 x 35; ;
229953_x_at;727;229953_x_at;LCA5;0	382835991;0	207637767;0	450407116;-0	382148855;0	530892899;4	059973082;0.000104683872155009 .;1 x 35;6 q14;"LCA5	lebercilin [Source:HGNC Symbol;Acc:HGNC:31923]"
1560884_at;40;1560884_at;SLC17A1;0	139774535;0	18637366;0	830200261;-0	139774535;0	530819842;4	059195171;0.000104934149176783 .;1 x 30;6 p22;"solute carrier family 17 member 1 [Source:HGNC Symbol;Acc:HGNC:10929]"
242135_at;784;242135_at;;0	06920176;0	123003041;0	422345577;-0	06920176;0	530341486;4	054104794;0.000106586293684652 .;1 x 31; ;
227750_at;967;227750_at;KALRN;0	973885366;0	221525139;0	317989402;-0	494450123;0	530288905;4	053545589;0.000106769325239675 .;2 x 40;3 q21;"kalirin RhoGEF kinase [Source:HGNC Symbol;Acc:HGNC:4814]"
202210_x_at;456;202210_x_at;GSK3A;1	108204603;0	242454033;0	545951585;-0	510507557;0	529049934;4	040387737;0.000111165231588828 .;1 x 33;19 q13;"glycogen synthase kinase 3 alpha [Source:HGNC Symbol;Acc:HGNC:4616]"
1559678_s_at;229;1559678_s_at;GS1-24F4.2;0	203004898;0	210100004;0	643592695;-0	202396306;0	528397828;4	03347681;0.000113544063333304 .;2 x 35;8 p23;"uncharacterized LOC100652791 [Source:NCBI gene;Acc:100652791]"
1560721_at;149;1560721_at;;0	381083851;0	247345881;0	692784659;-0	380295975;0	528372885;4	033212671;0.000113635957950886 .;1 x 32; ;
1562876_s_at;206;1562876_s_at;;0	20337158;0	187718699;0	657043584;-0	202247969;0	528060712;4	029907997;0.000114791791469671 .;1 x 31;2 q13;
234623_x_at;429;234623_x_at;;0	048580174;0	128789529;0	55328899;-0	048580174;0	527892792;4	028131321;0.000115417909971494 .;1 x 30; ;
240774_at;205;240774_at;;0	507748271;0	266516451;0	657559302;-0	496172303;0	527760241;4	026729334;0.000115914326149213 .;1 x 32;12 p13;
213463_s_at;921;213463_s_at;FAM149B1;1	055672714;0	1495895;0	356523667;-0	306208306;0	527698678;4	026078323;0.00011614554077255 .;1 x 36;10 q22;"family with sequence similarity 149 member B1 [Source:HGNC Symbol;Acc:HGNC:29162]"
242562_at;26;242562_at;;0	482421995;0	262840808;0	881206264;-0	478187225;0	527661588;4	025686154;0.000116285041002917 .;1 x 32; ;
202259_s_at;568;202259_s_at;N4BP2L2;1	301666444;0	190239029;0	501438359;-0	564248897;0	527650116;4	02556486;0.000116328219930462 .;1 x 33;13 q13;"NEDD4 binding protein 2 like 2 [Source:HGNC Symbol;Acc:HGNC:26916]"
214212_x_at;179;214212_x_at;FERMT2;1	089223271;0	355783245;0	671823555;-0	790860482;0	527628848;4	025339992;0.000116408310744998 .;1 x 40;14 q22;"fermitin family member 2 [Source:HGNC Symbol;Acc:HGNC:15767]"
215177_s_at;614;215177_s_at;ITGA6;0	835235276;0	216290254;0	487130816;-0	51408163;0	527375646;4	022663793;0.000117365612946729 .;1 x 38;2 q31;"integrin subunit alpha 6 [Source:HGNC Symbol;Acc:HGNC:6142]"
244763_at;230;244763_at;MTRF1;0	158304288;0	180349151;0	642295917;-0	157798341;0	526762173;4	016185876;0.000119714598986076 .;1 x 35;13 q14;"mitochondrial translation release factor 1 [Source:HGNC Symbol;Acc:HGNC:7469]"
226525_at;198;226525_at;STK17B;0	818556093;0	339445284;0	661397217;-0	782077163;0	526646249;4	014962762;0.000120163214756053 .;1 x 40;2 q32;"serine/threonine kinase 17b [Source:HGNC Symbol;Acc:HGNC:11396]"
219682_s_at;401;219682_s_at;TBX3;0	082477929;0	145610666;0	563403052;-0	082477929;0	526165908;4	009897992;0.00012203832348634 .;3 x 32;12 q24;"T-box 3 [Source:HGNC Symbol;Acc:HGNC:11602]"
243277_x_at;43;243277_x_at;;0	134119449;0	181912003;0	827270176;-0	134119449;0	52607003;4	008887677;0.000122415753833316 .;1 x 30; ;
221120_at;266;221120_at;;0	500238851;0	245129211;0	622497806;-0	4997679;0	525720582;4	005207156;0.000123800322199052 .;1 x 32; ;
236879_at;84;236879_at;;0	176284746;0	212475418;0	755841997;-0	176284746;0	525360017;4	001412493;0.000125243749777626 .;3 x 34; ;
219573_at;887;219573_at;CARMIL1;1	056200927;0	227326346;0	376182004;-0	471586881;0	525090808;3	998581215;0.00012633135395701 .;2 x 40;6 p22;"capping protein regulator and myosin 1 linker 1 [Source:HGNC Symbol;Acc:HGNC:21581]"
1564909_at;533;1564909_at;LOC101928495;0	027831088;0	108608429;0	519050294;-0	027831088;0	525075797;3	998423392;0.000126392249089946 .;1 x 30;X q25;
236348_at;363;236348_at;;0	407383321;0	215580935;0	581910865;-0	331065642;0	524859071;3	996145365;0.000127274393503019 .;1 x 34; ;
225545_at;468;225545_at;EEF2K;0	972283531;0	174835637;0	541786354;-0	225568048;0	524704387;3	994520114;0.000127907407769468 .;3 x 32;16 p12;"eukaryotic elongation factor 2 kinase [Source:HGNC Symbol;Acc:HGNC:24615]"
1553759_at;342;1553759_at;MCM9;0	166476259;0	173208075;0	589899402;-0	16532184;0	524621785;3	993652451;0.000128246601660775 .;3 x 32;6 q22;"minichromosome maintenance 9 homologous recombination repair factor [Source:HGNC Symbol;Acc:HGNC:21484]"
239428_at;225;239428_at;;0	359338529;0	238275831;0	645120185;-0	33958457;0	524154667;3	988748694;0.000130180096227894 .;1 x 32; ;
236612_at;484;236612_at;;0	241983849;0	215768665;0	536199915;-0	238808071;0	524120339;3	988388517;0.000130323220327355 .;1 x 33; ;
1563546_at;12;1563546_at;;0	111098787;0	181144877;0	953961957;-0	111098787;0	524116661;3	988349929;0.000130338563060883 .;1 x 30; ;
240941_at;50;240941_at;;0	171739554;0	193906295;0	815742838;-0	171730027;0	523647131;3	983426263;0.000132310694240356 .;1 x 31; ;
242335_at;188;242335_at;SLC25A37;0	149640709;0	170639875;0	667790024;-0	148815205;0	523634456;3	983293418;0.000132364303564003 .;1 x 31;8 p21;"solute carrier family 25 member 37 [Source:HGNC Symbol;Acc:HGNC:29786]"
211494_s_at;327;211494_s_at;SLC4A4;0	727106779;0	343255196;0	596391933;-0	710014459;0	523433895;3	981191837;0.000133215200359915 .;1 x 40;4 q13;"solute carrier family 4 member 4 [Source:HGNC Symbol;Acc:HGNC:11030]"
243216_x_at;121;243216_x_at;ARHGAP12;0	83180771;0	339084252;0	71775743;-0	730555456;0	523397152;3	980806921;0.00013337162100191 .;1 x 37;10 p11;"Rho GTPase activating protein 12 [Source:HGNC Symbol;Acc:HGNC:16348]"
1566102_at;399;1566102_at;;0	084019047;0	156610781;0	564320298;-0	084019047;0	523290511;3	979689952;0.000133826540245963 .;1 x 31; ;
237950_s_at;208;237950_s_at;;0	173058082;0	17024916;0	65668677;-0	173058082;0	523030201;3	976964497;0.000134942893783796 .;1 x 31;1 q21;"long intergenic non-protein coding RNA 1719 [Source:HGNC Symbol;Acc:HGNC:52506]"
210400_at;372;210400_at;GRIN2C;0	568204827;0	333275234;0	579422734;-0	53728308;0	522794151;3	974494374;0.000135962466362272 .;1 x 40;17 q25;"glutamate ionotropic receptor NMDA type subunit 2C [Source:HGNC Symbol;Acc:HGNC:4587]"
214835_s_at;625;214835_s_at;;0	726585576;0	240649646;0	483056968;-0	547682653;0	522101566;3	967254127;0.000138994221592581 .;1 x 38;12 q22;"succinate-CoA ligase GDP-forming beta subunit pseudogene 2 [Source:HGNC Symbol;Acc:HGNC:43997]"
226073_at;911;226073_at;TMEM218;0	7922698;0	154620008;0	3619208;-0	39618015;0	522085055;3	96708166;0.000139067234188328 .;1 x 36;11 q24;"transmembrane protein 218 [Source:HGNC Symbol;Acc:HGNC:27344]"
1569262_x_at;184;1569262_x_at;UBE3D;0	269628404;0	240901826;0	669540174;-0	249741648;0	521016054;3	955927949;0.000143868899322386 .;1 x 33;6 q14;"ubiquitin protein ligase E3D [Source:HGNC Symbol;Acc:HGNC:21381]"
228171_s_at;57;228171_s_at;PLEKHG4;0	098691616;0	184075243;0	801330171;-0	098691616;0	520575923;3	951343161;0.000145888949188544 .;1 x 30;16 q22;"pleckstrin homology and RhoGEF domain containing G4 [Source:HGNC Symbol;Acc:HGNC:24501]"
242792_at;419;242792_at;;0	047333906;0	120281391;0	556105119;-0	047333906;0	520155255;3	946965148;0.000147843556012051 .;1 x 30; ;
212629_s_at;1018;212629_s_at;PKN2;1	556911691;0	124361118;0	246277603;-0	25050018;0	518999767;3	934959898;0.000153334619054979 .;3 x 34;1 p22;"protein kinase N2 [Source:HGNC Symbol;Acc:HGNC:9406]"
215320_at;866;215320_at;;0	110583208;0	137136544;0	390209285;-0	110583208;0	518520562;3	929989745;0.000155665335206945 .;3 x 32;9 q22;"SPATA31 subfamily C member 1 [Source:HGNC Symbol;Acc:HGNC:27846]"
1562142_at;65;1562142_at;;0	126119763;0	17272324;0	794765496;-0	126119763;0	517982616;3	924416386;0.000158319773573279 .;1 x 30; ;
1556803_at;119;1556803_at;;0	160527481;0	189356094;0	71831623;-0	159769515;0	517846952;3	923011849;0.000158995606761581 .;1 x 31; ;
243644_at;517;243644_at;PUS7L;0	148140498;0	147527546;0	522486572;-0	148140498;0	517580112;3	920250428;0.000160332506358274 .;1 x 31;12 q12;"pseudouridylate synthase 7 like [Source:HGNC Symbol;Acc:HGNC:25276]"
37170_at;464;37170_at;BMP2K;1	00553629;0	156633024;0	542523354;-0	347538134;0	517324489;3	917606542;0.000161622708032105 .;1 x 31;4 q21;"BMP2 inducible kinase [Source:HGNC Symbol;Acc:HGNC:18041]"
243751_at;287;243751_at;CHD2;0	232442258;0	215106481;0	611731193;-0	232442258;0	516446543;3	908536937;0.000166125529926342 .;1 x 33;15 q26;"chromodomain helicase DNA binding protein 2 [Source:HGNC Symbol;Acc:HGNC:1917]"
209730_at;463;209730_at;SEMA3F;0	411745975;0	221603523;0	542737701;-0	385061935;0	516200138;3	905994483;0.000167409451619971 .;1 x 33;3 p21;"semaphorin 3F [Source:HGNC Symbol;Acc:HGNC:10728]"
228762_at;728;228762_at;LFNG;0	638610359;0	25237528;0	449761568;-0	617527058;0	516038364;3	90432598;0.000168257253278625 .;1 x 37;7 p22;"LFNG O-fucosylpeptide 3-beta-N-acetylglucosaminyltransferase [Source:HGNC Symbol;Acc:HGNC:6560]"
228686_at;531;228686_at;LINC01184;0	946484404;0	159475056;0	519654013;-0	39921023;0	515800141;3	901870049;0.000169512735252675 .;3 x 34;5 q23;"long intergenic non-protein coding RNA 1184 [Source:HGNC Symbol;Acc:HGNC:49565]"
229263_at;396;229263_at;IL17RD;0	191750213;0	183478291;0	565171846;-0	191750213;0	515712701;3	900968902;0.00016997567749244 .;2 x 33;3 p14;"interleukin 17 receptor D [Source:HGNC Symbol;Acc:HGNC:17616]"
230419_at;428;230419_at;SOX9-AS1;0	135771458;0	182276343;0	553387054;-0	135771458;0	514683055;3	890369969;0.000175513366167723 .;1 x 38;17 q24;"SOX9 antisense RNA 1 [Source:HGNC Symbol;Acc:HGNC:49321]"
239662_x_at;274;239662_x_at;;0	650840215;0	260022633;0	619265125;-0	566612139;0	51454166;3	888916271;0.000176286383497759 .;1 x 36; ;
229350_x_at;620;229350_x_at;PARP10;0	354042233;0	198886969;0	485452839;-0	351387126;0	514008532;3	88343901;0.000179228689663358 .;2 x 34;8 q24;"poly(ADP-ribose) polymerase family member 10 [Source:HGNC Symbol;Acc:HGNC:25895]"
1558842_at;450;1558842_at;;0	546624449;0	234378573;0	547647066;-0	529742368;0	5136369;3	879624549;0.000181305793844344 .;2 x 36; ;
206756_at;17;206756_at;CHST7;0	610419125;0	432978436;0	909816633;-0	610419125;0	513594309;3	879187585;0.000181545217996182 .;1 x 40;X p11;"carbohydrate sulfotransferase 7 [Source:HGNC Symbol;Acc:HGNC:13817]"
209252_at;999;209252_at;HARS2;1	321246649;0	111182717;0	282324954;-0	214636793;0	513479393;3	878008781;0.000182192644408774 .;3 x 33;5 q31;"histidyl-tRNA synthetase 2	mitochondrial [Source:HGNC Symbol;Acc:HGNC:4817]"
223468_s_at;774;223468_s_at;RGMA;1	401917607;0	241186711;0	427908307;-0	440120925;0	513327291;3	876448961;0.00018305277044095 .;2 x 40;15 q26;"repulsive guidance molecule family member a [Source:HGNC Symbol;Acc:HGNC:30308]"
1570244_at;240;1570244_at;;0	455919488;0	228319684;0	632925606;-0	363704623;0	512668969;3	869703538;0.000186817845077791 .;2 x 33; ;
210738_s_at;100;210738_s_at;SLC4A4;0	727300093;0	424521034;0	73623318;-0	722911148;0	511811627;3	860932746;0.000191825650461608 .;1 x 40;4 q13;"solute carrier family 4 member 4 [Source:HGNC Symbol;Acc:HGNC:11030]"
227963_at;716;227963_at;LRRC75A-AS1;0	529727118;0	222720231;0	455792686;-0	520909857;0	511776196;3	860570617;0.000192035181227235 .;1 x 35;17 p11;"LRRC75A antisense RNA 1 [Source:HGNC Symbol;Acc:HGNC:28619]"
235484_at;997;235484_at;PTAR1;1	248871309;0	158597714;0	285501224;-0	41061655;0	511230749;3	854999129;0.000195286941869099 .;1 x 37;9 q21;"protein prenyltransferase alpha subunit repeat containing 1 [Source:HGNC Symbol;Acc:HGNC:30449]"
203939_at;403;203939_at;NT5E;1	210856915;0	226875667;0	562844042;-0	561106613;0	511217434;3	854863196;0.000195366940092701 .;2 x 40;6 q14;"5'-nucleotidase ecto [Source:HGNC Symbol;Acc:HGNC:8021]"
237251_at;216;237251_at;LRRC71;0	26968418;0	272152095;0	653431764;-0	269350185;0	511126785;3	853937898;0.000195912333754933 .;1 x 39;1 q23;"leucine rich repeat containing 71 [Source:HGNC Symbol;Acc:HGNC:26556]"
216580_at;474;216580_at;;0	188207201;0	163628185;0	540002785;-0	18820575;0	510231403;3	844807618;0.000201373528612825 .;1 x 31;6 q14;"ribosomal protein L7 pseudogene 27 [Source:HGNC Symbol;Acc:HGNC:36649]"
220900_at;645;220900_at;;0	151458464;0	159375175;0	476814155;-0	151458464;0	510022337;3	842678189;0.000202668247765492 .;1 x 35;5 q15;
232915_at;56;232915_at;DDX49;0	244819193;0	224345821;0	806821753;-0	24328086;0	509654553;3	838934383;0.000204964075662839 .;1 x 32;19 p13;"DEAD-box helicase 49 [Source:HGNC Symbol;Acc:HGNC:18684]"
205891_at;49;205891_at;ADORA2B;0	662645497;0	454222155;0	818983564;-0	662645497;0	509479095;3	83714934;0.000206067559620937 .;1 x 40;17 p12;"adenosine A2b receptor [Source:HGNC Symbol;Acc:HGNC:264]"
243421_at;161;243421_at;;0	099828155;0	147380836;0	68437676;-0	099813422;0	509387395;3	836216674;0.000206646401918698 .;1 x 30;2 p12;
240542_at;235;240542_at;;0	064173423;0	133030923;0	638029283;-0	064173423;0	509365108;3	835990019;0.000206787308342782 .;1 x 30; ;
242472_x_at;918;242472_x_at;FNBP4;0	808631031;0	168031493;0	358183961;-0	432406737;0	508424376;3	826432606;0.000212814248447213 .;3 x 34;11 p11;"formin binding protein 4 [Source:HGNC Symbol;Acc:HGNC:19752]"
221435_x_at;760;221435_x_at;HYI;0	529948623;0	189007413;0	43575164;-0	495121643;0	507995607;3	822082644;0.000215613264725967 .;1 x 34;1 p34;"hydroxypyruvate isomerase (putative) [Source:HGNC Symbol;Acc:HGNC:26948]"
205191_at;937;205191_at;RP2;0	761728872;0	170143837;0	340951654;-0	570219142;0	5078505;3	820611362;0.000216568001837558 .;2 x 36;X p11;"RP2	ARL3 GTPase activating protein [Source:HGNC Symbol;Acc:HGNC:10274]"
1555729_a_at;511;1555729_a_at;CD209;0	307804744;0	208603562;0	524862135;-0	307804744;0	507675352;3	818836073;0.000217725454868978 .;1 x 32;19 p13;"CD209 molecule [Source:HGNC Symbol;Acc:HGNC:1641]"
242724_x_at;871;242724_x_at;;0	086893452;0	119056183;0	387634812;-0	086893452;0	50745819;3	816635829;0.000219168269914638 .;2 x 31; ;
1557864_x_at;228;1557864_x_at;PLA2G4E-AS1;0	150430719;0	175562014;0	644054634;-0	150430719;0	507067124;3	812676071;0.000221788205517992 .;1 x 31;15 q15;"PLA2G4E antisense RNA 1 [Source:HGNC Symbol;Acc:HGNC:51419]"
214801_at;780;214801_at;TOR1AIP2;1	222860078;0	134656154;0	423364655;-0	283593484;0	506965302;3	811645588;0.000222474962724206 .;2 x 32;1 q25;"torsin 1A interacting protein 2 [Source:HGNC Symbol;Acc:HGNC:24055]"
1569934_at;63;1569934_at;;0	434280683;0	223845958;0	795707353;-0	376566376;0	506862956;3	810610022;0.000223167177349382 .;1 x 30; ;
230575_at;825;230575_at;MSRB2;0	377893336;0	213646607;0	405087123;-0	358180995;0	506081518;3	802710331;0.00022851658767542 .;1 x 36;10 p12;"methionine sulfoxide reductase B2 [Source:HGNC Symbol;Acc:HGNC:17061]"
231696_x_at;3;231696_x_at;;0	229421146;0	325600553;1	109114373;-0	229421146;0	505797373;3	799840979;0.000230490124679461 .;1 x 30; ;
237286_at;530;237286_at;INTS9;0	167065371;0	187286104;0	519845887;-0	167065371;0	505449946;3	796334856;0.000232923993314649 .;1 x 31;8 p21;"integrator complex subunit 9 [Source:HGNC Symbol;Acc:HGNC:25592]"
242549_at;528;242549_at;PRKD3;0	271627342;0	205040342;0	519872777;-0	262949958;0	504965036;3	791445449;0.000236359597164171 .;1 x 32;2 p22;"protein kinase D3 [Source:HGNC Symbol;Acc:HGNC:9408]"
1568935_at;150;1568935_at;;0	165051629;0	202619769;0	692581032;-0	165000729;0	503827765;3	77999707;0.00024459649859021 .;2 x 34; ;
215892_at;374;215892_at;ZNF440;0	286266249;0	236200168;0	579125233;-0	265772979;0	503802665;3	779744698;0.000244781162410668 .;2 x 34;19 p13;"zinc finger protein 440 [Source:HGNC Symbol;Acc:HGNC:20874]"
1565875_at;202;1565875_at;;0	397958482;0	214472051;0	659997077;-0	318809884;0	503646693;3	778176744;0.00024593147388885 .;1 x 33; ;
205276_s_at;315;205276_s_at;GTPBP1;0	672411692;0	193978755;0	601867799;-0	354042254;0	50193827;3	761034578;0.000258852974181711 .;1 x 31;22 q13;"GTP binding protein 1 [Source:HGNC Symbol;Acc:HGNC:4669]"
236894_at;88;236894_at;L1TD1;0	35029769;0	244895147;0	749554685;-0	35029769;0	501615183;3	757799387;0.000261364039085166 .;1 x 32;1 p31;"LINE1 type transposase domain containing 1 [Source:HGNC Symbol;Acc:HGNC:25595]"
231046_at;514;231046_at;LINC01023;0	45810004;0	233318254;0	523915036;-0	422585878;0	501446322;3	756109356;0.000262685125710371 .;1 x 33;5 q21;"long intergenic non-protein coding RNA 1023 [Source:HGNC Symbol;Acc:HGNC:49004]"
1561059_a_at;241;1561059_a_at;LINC00691;0	056129738;0	141159587;0	631839092;-0	056129738;0	501143505;3	753080067;0.000265069243892913 .;1 x 30;3 p24;"long intergenic non-protein coding RNA 691 [Source:HGNC Symbol;Acc:HGNC:44514]"
233945_at;314;233945_at;UGGT2;0	610031914;0	236969029;0	602035728;-0	606993597;0	501075502;3	752400047;0.000265607297811221 .;1 x 33;13 q32;"UDP-glucose glycoprotein glucosyltransferase 2 [Source:HGNC Symbol;Acc:HGNC:15664]"
225602_at;328;225602_at;GLIPR2;0	775768305;0	250128504;0	595422548;-0	581543875;0	500669798;3	748344944;0.000268837769738406 .;1 x 35;9 p13;"GLI pathogenesis related 2 [Source:HGNC Symbol;Acc:HGNC:18007]"
233106_at;743;233106_at;FRMD6-AS1;0	767875487;0	147394382;0	443885342;-0	287550893;0	500489284;3	746541732;0.000270286432661804 .;3 x 33;14 q22;"FRMD6 antisense RNA 1 [Source:HGNC Symbol;Acc:HGNC:20129]"
1561595_x_at;217;1561595_x_at;LOC101928238;0	318675235;0	252400434;0	652985927;-0	318675235;0	500437066;3	746020233;0.000270706796056119 .;1 x 32;19 p13;
1560695_at;21;1560695_at;QTRT2;0	205109086;0	219227191;0	89355612;-0	205094574;0	500029637;3	741953101;0.000274006889249279 .;1 x 31;3 q13;"queuine tRNA-ribosyltransferase accessory subunit 2 [Source:HGNC Symbol;Acc:HGNC:25771]"
1558409_at;221;1558409_at;;0	338680175;0	23881151;0	650808583;-0	32597916;0	499868657;3	740347052;0.000275320705198645 .;2 x 33; ;
231372_at;142;231372_at;SLC25A48;0	277974037;0	298426058;0	700386543;-0	277974037;0	499830339;3	739964836;0.000275634268015912 .;1 x 40;5 q31;"solute carrier family 25 member 48 [Source:HGNC Symbol;Acc:HGNC:30451]"
1552803_a_at;634;1552803_a_at;STMN1;0	552473599;0	270473465;0	479578231;-0	543912028;0	49905002;3	732187709;0.00028208979102895 .;1 x 36;1 p36;"stathmin 1 [Source:HGNC Symbol;Acc:HGNC:6510]"
1560760_s_at;301;1560760_s_at;LINC01527;0	252370342;0	211407381;0	606078477;-0	246895741;0	498607926;3	727786907;0.000285807085550482 .;1 x 32;1 q21;"long intergenic non-protein coding RNA 1527 [Source:HGNC Symbol;Acc:HGNC:51266]"
230774_at;906;230774_at;PTGR2;0	648454775;0	160400623;0	366571793;-0	327733555;0	49851943;3	726906438;0.000286556454912157 .;1 x 32;14 q24;"prostaglandin reductase 2 [Source:HGNC Symbol;Acc:HGNC:20149]"
1555391_a_at;657;1555391_a_at;CARF;0	29376403;0	182854729;0	473007284;-0	293490577;0	498429561;3	726012469;0.000287319251639495 .;1 x 32;2 q33;"calcium responsive transcription factor [Source:HGNC Symbol;Acc:HGNC:14435]"
1558797_at;515;1558797_at;;0	242968233;0	212655689;0	523424952;-0	242968233;0	497671601;3	718479072;0.000293825500128353 .;1 x 33; ;
55662_at;954;55662_at;C10orf76;0	961254667;0	142982334;0	326342536;-0	528775815;0	497487909;3	716655053;0.000295422050081262 .;1 x 35;10 q24;"chromosome 10 open reading frame 76 [Source:HGNC Symbol;Acc:HGNC:25788]"
230456_at;520;230456_at;;0	194417957;0	190549983;0	521540186;-0	194417957;0	497245434;3	714248342;0.0002975414255878 .;1 x 37; ;
243733_at;77;243733_at;;0	074384573;0	15162335;0	763785791;-0	074384573;0	497209012;3	713886934;0.000297860947647721 .;1 x 30; ;
215585_at;641;215585_at;;0	412250474;0	238715126;0	477789444;-0	412047876;0	497195951;3	713757338;0.000297975604995893 .;1 x 35; ;
1554504_at;335;1554504_at;NAALAD2;0	326855977;0	202906;0	592873406;-0	326533071;0	497165023;3	713450474;0.000298247264801432 .;1 x 32;11 q14;"N-acetylated alpha-linked acidic dipeptidase 2 [Source:HGNC Symbol;Acc:HGNC:14526]"
234335_s_at;706;234335_s_at;;0	181488108;0	195091295;0	458363524;-0	181488108;0	496802451;3	709854474;0.000301448570943608 .;1 x 35; ;
211632_at;300;211632_at;;0	386551845;0	22335725;0	606521934;-0	33721619;0	496667516;3	708516838;0.000302647818596569 .;1 x 31; ;
223617_x_at;747;223617_x_at;ATAD3B;0	776457905;0	13537199;0	442764545;-0	22411808;0	496391706;3	7057838;0.000305112413721886 .;1 x 31;1 p36;"ATPase family	AAA domain containing 3B [Source:HGNC Symbol;Acc:HGNC:24007]"
1567697_at;355;1567697_at;;0	322152326;0	185744832;0	585347772;-0	313081894;0	496236612;3	704247607;0.00030650619751138 .;1 x 31; ;
243183_at;950;243183_at;;0	885902561;0	157466243;0	327672724;-0	392313682;0	495859138;3	700510727;0.000309922320949507 .;2 x 35; ;
233431_x_at;650;233431_x_at;;0	978618715;0	174569131;0	475684637;-0	345550497;0	495599297;3	697939988;0.000312293665762242 .;3 x 33; ;
1566932_x_at;555;1566932_x_at;;0	14153011;0	142522577;0	505921906;-0	140142207;0	495543811;3	697391209;0.000312802140001178 .;1 x 30; ;
235771_at;455;235771_at;;0	21034387;0	186145198;0	546265307;-0	208902664;0	495313418;3	695113174;0.000314921401876056 .;1 x 32; ;
1559133_at;494;1559133_at;ZNF546;0	285513736;0	20463354;0	53104804;-0	276298942;0	492855307;3	670872338;0.000338346489240582 .;1 x 31;19 q13;"zinc finger protein 546 [Source:HGNC Symbol;Acc:HGNC:28671]"
232858_at;263;232858_at;;0	518038024;0	27128323;0	624675476;-0	500824735;0	492254832;3	664968421;0.000344300831606636 .;1 x 33; ;
242293_at;957;242293_at;ING3;0	817189898;0	179379294;0	323590813;-0	516295523;0	492068121;3	663134066;0.000346171299811182 .;1 x 35;7 q31;"inhibitor of growth family member 3 [Source:HGNC Symbol;Acc:HGNC:14587]"
241724_x_at;783;241724_x_at;;1	033218527;0	195165222;0	422407531;-0	581048777;0	491526142;3	657813151;0.000351652461225482 .;3 x 34; ;
236437_at;105;236437_at;;0	532801057;0	228931559;0	730981007;-0	392076166;0	491144434;3	654069067;0.000355559257456228 .;1 x 32; ;
235846_at;834;235846_at;;0	568326034;0	233857882;0	401959776;-0	531602892;0	490798725;3	650680479;0.000359131082909636 .;1 x 37;8 q22;
1559285_at;811;1559285_at;;0	112175474;0	135900731;0	411770171;-0	112175474;0	490665718;3	649377366;0.000360513830555576 .;1 x 30;14 q32;
1559103_s_at;576;1559103_s_at;;0	329922796;0	181198941;0	500553517;-0	311735537;0	490663426;3	649354918;0.000360537695123675 .;1 x 32;4 q25;
216206_x_at;284;216206_x_at;MAP2K7;0	7533163;0	247060834;0	612496099;-0	630827788;0	490527748;3	648025995;0.000361953194159659 .;1 x 34;19 p13;"mitogen-activated protein kinase kinase 7 [Source:HGNC Symbol;Acc:HGNC:6847]"
1566544_at;389;1566544_at;PPP5D1;0	127212061;0	146288946;0	568514448;-0	127212061;0	49024934;3	645300164;0.000364873354497641 .;1 x 31;19 q13;"PPP5 tetratricopeptide repeat domain containing 1 [Source:HGNC Symbol;Acc:HGNC:44209]"
220371_s_at;251;220371_s_at;SLC12A9;0	603219357;0	21427926;0	627975251;-0	509068144;0	489869747;3	641586026;0.000368888776881571 .;1 x 37;7 q22;"solute carrier family 12 member 9 [Source:HGNC Symbol;Acc:HGNC:17435]"
231560_at;752;231560_at;;0	328285601;0	187811303;0	43939626;-0	295182046;0	489647229;3	639410056;0.000371260966647968 .;1 x 34;3 q26;
238869_at;420;238869_at;;0	830694614;0	192445015;0	555938924;-0	60221499;0	489235064;3	63538204;0.000375690979664722 .;2 x 36; ;
204421_s_at;434;204421_s_at;FGF2;0	255013897;0	230764157;0	552123453;-0	254973253;0	488781068;3	630948908;0.000380625290672731 .;1 x 39;4 q28;"fibroblast growth factor 2 [Source:HGNC Symbol;Acc:HGNC:3676]"
232270_at;392;232270_at;C9orf3;0	228717112;0	172782951;0	567903409;-0	227361137;0	487722569;3	620628042;0.000392355519248211 .;1 x 31;9 q22;"chromosome 9 open reading frame 3 [Source:HGNC Symbol;Acc:HGNC:1361]"
241199_x_at;79;241199_x_at;;0	396851601;0	286093567;0	761702305;-0	396365065;0	487518494;3	618640631;0.000394653873028616 .;1 x 32; ;
211692_s_at;883;211692_s_at;BBC3;0	884401111;0	208295942;0	377200895;-0	598672684;0	486544609;3	609167003;0.000405788715138189 .;2 x 35;19 q13;"BCL2 binding component 3 [Source:HGNC Symbol;Acc:HGNC:17868]"
1552899_at;344;1552899_at;;0	450883444;0	198905913;0	589623241;-0	392781462;0	486427642;3	608030375;0.000407144760589784 .;1 x 32;6 q23;"long intergenic non-protein coding RNA 1312 [Source:HGNC Symbol;Acc:HGNC:28525]"
212154_at;839;212154_at;SDC2;1	015045256;0	206676452;0	40010053;-0	377203078;0	486390234;3	607666913;0.000407579303606909 .;1 x 39;8 q22;"syndecan 2 [Source:HGNC Symbol;Acc:HGNC:10659]"
1562999_x_at;207;1562999_x_at;;0	118441543;0	185416241;0	656798256;-0	117836592;0	48624994;3	606304037;0.000409212685965832 .;2 x 31; ;
219285_s_at;97;219285_s_at;;0	170542218;0	230066556;0	739724737;-0	170542218;0	48609883;3	604836497;0.000410978537591311 .;1 x 31; ;
1559722_at;545;1559722_at;;0	332949295;0	21184969;0	511690899;-0	298871798;0	486091325;3	604763625;0.000411066413305683 .;1 x 33; ;
243850_at;60;243850_at;;0	234400266;0	222077807;0	798414367;-0	234400266;0	485515394;3	599174299;0.000417860565259387 .;1 x 30;15 q25;
214807_at;304;214807_at;PLXDC2;1	038093971;0	166746976;0	605291906;-0	250816007;0	485394688;3	598003644;0.000419297162407073 .;3 x 32;10 p12;"plexin domain containing 2 [Source:HGNC Symbol;Acc:HGNC:21013]"
234536_at;910;234536_at;;0	184380561;0	164818674;0	363034495;-0	184380561;0	485245721;3	596559273;0.000421076196826742 .;2 x 35; ;
241401_at;617;241401_at;WDFY3-AS2;0	775728305;0	250950835;0	48671906;-0	643184517;0	48430349;3	587432954;0.000432485843787411 .;1 x 39;4 q21;"WDFY3 antisense RNA 2 [Source:HGNC Symbol;Acc:HGNC:21603]"
232797_at;827;232797_at;;1	084997253;0	188713858;0	4045653;-0	372485939;0	483735265;3	581937101;0.0004394993015715 .;1 x 37; ;
232271_at;259;232271_at;HNF4G;0	099929775;0	161746817;0	625948262;-0	099929775;0	483582671;3	580462221;0.000441399954733912 .;1 x 30;8 q21;"hepatocyte nuclear factor 4 gamma [Source:HGNC Symbol;Acc:HGNC:5026]"
46947_at;853;46947_at;;0	236256773;0	162665564;0	393369686;-0	235992397;0	483172382;3	576498737;0.000446546801294856 .;3 x 33; ;
209718_at;114;209718_at;NCAPH2;0	387920881;0	249363857;0	722427462;-0	360392697;0	483133768;3	576125871;0.000447033946403663 .;1 x 32;22 q13;"non-SMC condensin II complex subunit H2 [Source:HGNC Symbol;Acc:HGNC:25071]"
226105_at;1004;226105_at;C1GALT1;0	897971356;0	154721512;0	274092197;-0	449294421;0	483018299;3	575011055;0.000448493483747203 .;1 x 35;7 p22;"core 1 synthase	glycoprotein-N-acetylgalactosamine 3-beta-galactosyltransferase 1 [Source:HGNC Symbol;Acc:HGNC:24337]"
1560516_at;201;1560516_at;;0	100586079;0	173608752;0	660296835;-0	100586079;0	481978553;3	564983538;0.00046182889419677 .;2 x 31;10 q21;"TMEM26 antisense RNA 1 [Source:HGNC Symbol;Acc:HGNC:51209]"
1558893_a_at;16;1558893_a_at;DEUP1;0	13901401;0	198848141;0	917699033;-0	13901401;0	48197032;3	564904219;0.000461935879997655 .;1 x 30;11 q21;"deuterosome assembly protein 1 [Source:HGNC Symbol;Acc:HGNC:26344]"
216791_at;354;216791_at;;0	428287225;0	222615295;0	585628921;-0	409407507;0	481461456;3	560003866;0.000468591844862143 .;1 x 32; ;
243945_at;904;243945_at;TRIM2;0	589255825;0	199669767;0	367384868;-0	46591974;0	48082974;3	553926977;0.000476973706019623 .;1 x 36;4 q31;"tripartite motif containing 2 [Source:HGNC Symbol;Acc:HGNC:15974]"
233372_at;453;233372_at;;0	194375381;0	207988053;0	546693339;-0	193846507;0	479832565;3	544349129;0.000490477079132967 .;1 x 37;13 q31;
215070_x_at;973;215070_x_at;GPR21;1	044718505;0	133906036;0	310199417;-0	398021091;0	479510105;3	541255724;0.00049491610631569 .;1 x 32;9 q33;"RAB GTPase activating protein 1 [Source:HGNC Symbol;Acc:HGNC:17155]"
242958_x_at;35;242958_x_at;;0	235499125;0	202069909;0	848112678;-0	220553861;0	478867172;3	535093543;0.000503873876348981 .;1 x 30; ;
209663_s_at;273;209663_s_at;ITGA7;0	457260501;0	296029703;0	619497172;-0	454667644;0	478701116;3	533503189;0.000506210834158916 .;2 x 40;12 q13;"integrin subunit alpha 7 [Source:HGNC Symbol;Acc:HGNC:6143]"
1569600_at;159;1569600_at;;0	137438991;0	152661082;0	687394525;-0	137438991;0	47849842;3	531562585;0.000509076544499609 .;1 x 31; ;
1562962_at;86;1562962_at;;0	234330843;0	228493827;0	753944853;-0	232392631;0	478014916;3	526936482;0.000515970809078725 .;1 x 32; ;
226873_at;985;226873_at;MINDY2;1	668112649;0	142569343;0	299293836;-0	325468967;0	477833784;3	525204514;0.000518574903685565 .;2 x 36;15 q21;"MINDY lysine 48 deubiquitinase 2 [Source:HGNC Symbol;Acc:HGNC:26954]"
232455_x_at;846;232455_x_at;;1	153883045;0	179412768;0	397842653;-0	346294504;0	476959751;3	516855238;0.000531306116855923 .;2 x 34; ;
229954_at;222;229954_at;CHDH;0	15721072;0	198319396;0	649539116;-0	15721072;0	476490111;3	512374547;0.0005382613194993 .;2 x 39;3 p21;"choline dehydrogenase [Source:HGNC Symbol;Acc:HGNC:24288]"
230469_at;248;230469_at;RTKN2;0	096786571;0	15818622;0	629631763;-0	096786571;0	476269012;3	510266455;0.000541563717749272 .;1 x 30;10 q21;"rhotekin 2 [Source:HGNC Symbol;Acc:HGNC:19364]"
218687_s_at;418;218687_s_at;MUC13;0	335374475;0	215646041;0	557171831;-0	335139353;0	475435974;3	502331491;0.000554168951166667 .;1 x 32;3 q21;"mucin 13	cell surface associated [Source:HGNC Symbol;Acc:HGNC:7511]"
216982_x_at;607;216982_x_at;;0	37521809;0	194787614;0	488553751;-0	301167205;0	475271584;3	500767061;0.000556687093502317 .;1 x 31; ;
243342_at;815;243342_at;;0	402785097;0	187477023;0	4102892;-0	346973181;0	474129572;3	489912073;0.000574463674349213 .;1 x 33; ;
1560869_a_at;731;1560869_a_at;;0	419567709;0	214232034;0	44902143;-0	385659294;0	47404727;3	489130657;0.000575764105140042 .;1 x 36; ;
244119_at;247;244119_at;;0	071125195;0	14000236;0	629661469;-0	071125195;0	473697066;3	485806982;0.000581326905144341 .;1 x 31;13 q33;"long intergenic non-protein coding RNA 551 [Source:HGNC Symbol;Acc:HGNC:43691]"
238635_at;441;238635_at;;0	237712627;0	217689071;0	549939935;-0	237647338;0	473209798;3	48118601;0.000589146504407112 .;1 x 33; ;
219044_at;5;219044_at;THNSL2;0	41297488;0	350221324;1	014898855;-0	41297488;0	473101105;3	480155792;0.00059090350805624 .;1 x 33;2 p11;"threonine synthase like 2 [Source:HGNC Symbol;Acc:HGNC:25602]"
1555111_at;417;1555111_at;CCDC181;0	085353128;0	141888734;0	557363676;-0	085130013;0	473050972;3	47968069;0.000591715466921161 .;1 x 31;1 q24;"coiled-coil domain containing 181 [Source:HGNC Symbol;Acc:HGNC:28051]"
237963_x_at;527;237963_x_at;;0	254062028;0	221342504;0	519984556;-0	254062028;0	47290859;3	478331595;0.000594026920519131 .;1 x 34; ;
232980_at;694;232980_at;;0	140032104;0	154261884;0	462414048;-0	139758299;0	472833402;3	477619312;0.000595250784484191 .;1 x 33; ;
237825_x_at;502;237825_x_at;;0	413052421;0	212110702;0	52830642;-0	373787224;0	472515637;3	4746101;0.000600447963998718 .;1 x 32; ;
1558560_s_at;157;1558560_s_at;BLZF1;0	485992489;0	228587634;0	689693652;-0	343075083;0	472274623;3	472328881;0.000604416733873903 .;1 x 32;1 q24;"basic leucine zipper nuclear factor 1 [Source:HGNC Symbol;Acc:HGNC:1065]"
236441_at;838;236441_at;ZNF385C;0	292244707;0	188053632;0	400425454;-0	291583951;0	472248402;3	472080753;0.000604849925551987 .;2 x 36;17 q21;"chromosome 17 open reading frame 113 [Source:HGNC Symbol;Acc:HGNC:53437]"
240882_at;498;240882_at;LOC100506289;0	112348116;0	158424108;0	529763538;-0	112348116;0	471585617;3	465812902;0.000615891632496868 .;1 x 31;7 p15;
209495_at;885;209495_at;CEP250;0	337209404;0	202431869;0	376619098;-0	337209404;0	471524648;3	465236703;0.000616916308938897 .;1 x 33;20 q11;"centrosomal protein 250 [Source:HGNC Symbol;Acc:HGNC:1859]"
230307_at;567;230307_at;SLC25A21-AS1;0	40920372;0	219733704;0	501459591;-0	343733435;0	469442576;3	445598053;0.000652831393057163 .;1 x 32;14 q13;"SLC25A21 antisense RNA 1 [Source:HGNC Symbol;Acc:HGNC:44298]"
1556651_at;313;1556651_at;;0	34483306;0	215572529;0	602158857;-0	338708704;0	468653279;3	438172508;0.000666924985546657 .;1 x 33; ;
1553199_at;686;1553199_at;DCAF4L2;0	603322804;0	184434515;0	46442661;-0	467386764;0	468105811;3	433028236;0.000676858707383654 .;1 x 31;8 q21;"DDB1 and CUL4 associated factor 4 like 2 [Source:HGNC Symbol;Acc:HGNC:26657]"
1554264_at;82;1554264_at;CKAP2;0	341963966;0	224888907;0	756772468;-0	323623606;0	46751902;3	427520097;0.000687651701889891 .;1 x 30;13 q14;"cytoskeleton associated protein 2 [Source:HGNC Symbol;Acc:HGNC:1990]"
209591_s_at;110;209591_s_at;BMP7;0	27091708;0	270863924;0	726445718;-0	270887295;0	467294453;3	425413648;0.000691822504117257 .;2 x 40;20 q13;"bone morphogenetic protein 7 [Source:HGNC Symbol;Acc:HGNC:1074]"
238389_s_at;176;238389_s_at;;0	185229232;0	221848028;0	673294308;-0	185229232;0	466890123;3	421623149;0.000699388670356571 .;1 x 35; ;
208470_s_at;147;208470_s_at;HPR;0	529484446;0	292710554;0	696257689;-0	528980851;0	465908214;3	412429388;0.000718069834707347 .;1 x 37;16 q22;"haptoglobin-related protein [Source:HGNC Symbol;Acc:HGNC:5156]"
220522_at;143;220522_at;CRB1;0	228448607;0	24496675;0	698941583;-0	228448607;0	465090938;3	404789403;0.000733955270739717 .;1 x 40;1 q31;"crumbs 1	cell polarity complex component [Source:HGNC Symbol;Acc:HGNC:2343]"
205178_s_at;892;205178_s_at;RBBP6;1	116982889;0	185765728;0	373741233;-0	506836969;0	465052442;3	40442981;0.000734711158325241 .;2 x 34;16 p12;"RB binding protein 6	ubiquitin ligase [Source:HGNC Symbol;Acc:HGNC:9889]"
240922_at;61;240922_at;CEP112;0	221828787;0	231340365;0	797113916;-0	221828787;0	464925093;3	403240414;0.000737216642641703 .;3 x 33;17 q24;"centrosomal protein 112 [Source:HGNC Symbol;Acc:HGNC:28514]"
239438_at;330;239438_at;RAPGEF6;0	189573946;0	185427858;0	594955386;-0	189162695;0	464065193;3	395216334;0.000754333767560067 .;1 x 31;5 q31;"Rap guanine nucleotide exchange factor 6 [Source:HGNC Symbol;Acc:HGNC:20655]"
212459_x_at;778;212459_x_at;SUCLG2;1	007758311;0	208668506;0	425320516;-0	495911269;0	463907794;3	393748897;0.000757504869453918 .;1 x 39;3 p14;"succinate-CoA ligase GDP-forming beta subunit [Source:HGNC Symbol;Acc:HGNC:11450]"
243711_at;296;243711_at;;0	281001775;0	209566523;0	607512946;-0	280910086;0	463756621;3	392339905;0.000760561637337842 .;1 x 32;1 p22;
218588_s_at;896;218588_s_at;FAM114A2;0	652868365;0	186373351;0	371678335;-0	453216422;0	463278414;3	387885287;0.000770303392521487 .;3 x 34;5 q33;"family with sequence similarity 114 member A2 [Source:HGNC Symbol;Acc:HGNC:1333]"
1554793_at;461;1554793_at;UBE3C;0	382538909;0	188590495;0	543694221;-0	292325197;0	462524839;3	380873184;0.000785879572961057 .;3 x 33;7 q36;"ubiquitin protein ligase E3C [Source:HGNC Symbol;Acc:HGNC:16803]"
224101_x_at;874;224101_x_at;MRS2;0	683466288;0	174104352;0	385053105;-0	478583277;0	462285592;3	378648925;0.000790882805002835 .;1 x 32;6 p22;"MRS2	magnesium transporter [Source:HGNC Symbol;Acc:HGNC:13785]"
242501_at;604;242501_at;;0	524319811;0	183010049;0	489086817;-0	393525902;0	462233596;3	378165638;0.000791973915329258 .;2 x 32; ;
229490_s_at;122;229490_s_at;;0	415178089;0	256146679;0	717135036;-0	380351109;0	461632559;3	372582475;0.000804683460604916 .;1 x 32; ;
239477_at;74;239477_at;EFHB;0	105386913;0	200167098;0	770286302;-0	105386913;0	461516556;3	371505582;0.000807157170300776 .;1 x 35;3 p24;"EF-hand domain family member B [Source:HGNC Symbol;Acc:HGNC:26330]"
244213_at;148;244213_at;;0	118665025;0	163099568;0	69387491;-0	117404769;0	461274597;3	369260096;0.000812338565068349 .;1 x 30; ;
225237_s_at;976;225237_s_at;MSI2;1	284109669;0	178357423;0	308222479;-0	368429847;0	460353487;3	360720523;0.00083233436905128 .;1 x 39;17 q22;"musashi RNA binding protein 2 [Source:HGNC Symbol;Acc:HGNC:18585]"
1559128_at;421;1559128_at;;0	313461921;0	252381501;0	555603628;-0	313461921;0	460277595;3	360017552;0.000834001136618356 .;1 x 33; ;
233548_at;349;233548_at;;0	213489171;0	185213033;0	587670481;-0	213449902;0	458811213;3	346452982;0.000866792660926707 .;2 x 35; ;
220764_at;744;220764_at;;0	450027248;0	195231008;0	443295535;-0	398867792;0	458596149;3	344466475;0.000871696791702847 .;1 x 32; ;
1556657_at;451;1556657_at;;0	13169014;0	192841037;0	54763056;-0	131689982;0	45807535;3	339659045;0.000883674559606917 .;1 x 32; ;
1568866_at;750;1568866_at;;0	739440595;0	17871673;0	440699248;-0	461355553;0	456444897;3	324636614;0.000922121031958101 .;3 x 34; ;
243548_x_at;324;243548_x_at;;0	280691229;0	210535273;0	598491578;-0	278648059;0	455818233;3	318874026;0.000937287240518891 .;1 x 30; ;
217453_at;326;217453_at;;0	308755147;0	231005734;0	597592711;-0	308755147;0	455817872;3	318870704;0.000937296051156666 .;1 x 33;10 q22;
205296_at;131;205296_at;RBL1;0	167849452;0	186128942;0	712817816;-0	167849452;0	455725172;3	318018803;0.000939558174028132 .;2 x 31;20 q11;"RB transcriptional corepressor like 1 [Source:HGNC Symbol;Acc:HGNC:9893]"
237959_at;516;237959_at;;0	367460895;0	219096328;0	523262659;-0	329185381;0	455347668;3	314550965;0.000948820310171516 .;2 x 35; ;
1556831_at;404;1556831_at;DYNC1H1;0	734999719;0	199978738;0	562722268;-0	468708213;0	453764281;3	300030146;0.000988554996302127 .;2 x 31;14 q32;"dynein cytoplasmic 1 heavy chain 1 [Source:HGNC Symbol;Acc:HGNC:2961]"
204932_at;366;204932_at;TNFRSF11B;0	127993452;0	163470182;0	580966434;-0	127993452;0	45333522;3	296102131;0.000999572448247776 .;1 x 30;8 q24;"TNF receptor superfamily member 11b [Source:HGNC Symbol;Acc:HGNC:11909]"
233918_at;797;233918_at;DCDC2B;0	523761042;0	219798471;0	416022162;-0	402654341;0	453130888;3	294232499;0.00100485736712785 .;1 x 32;1 p35;"doublecortin domain containing 2B [Source:HGNC Symbol;Acc:HGNC:32576]"
234419_x_at;812;234419_x_at;;0	140826199;0	162645038;0	411513625;-0	140826199;0	452541938;3	288847298;0.00102022860400375 .;3 x 33; ;
207756_at;821;207756_at;;0	304140559;0	204478419;0	408432445;-0	304140559;0	452015693;3	284040031;0.00103413872295111 .;1 x 35; ;
1554920_at;256;1554920_at;SCEL;0	162449079;0	19029396;0	626924474;-0	162388469;0	450799255;3	272944297;0.00106693589746543 .;2 x 32;13 q22;"sciellin [Source:HGNC Symbol;Acc:HGNC:10573]"
208916_at;547;208916_at;SLC1A5;0	16186553;0	176867396;0	510777263;-0	16186553;0	450566002;3	270819301;0.00107332871502808 .;1 x 32;19 q13;"solute carrier family 1 member 5 [Source:HGNC Symbol;Acc:HGNC:10943]"
233377_at;133;233377_at;;0	193839356;0	188406147;0	710416248;-0	193389783;0	449793366;3	26378638;0.00109474684119937 .;1 x 31; ;
1559007_s_at;660;1559007_s_at;;0	544902941;0	230977502;0	471581272;-0	443803053;0	449076547;3	257269748;0.00111495425385066 .;2 x 34;5 p13;
230728_at;817;230728_at;FKBP14;1	021618346;0	16996114;0	409435999;-0	342244025;0	4487477;3	254282824;0.00112433424710601 .;2 x 36;7 p14;"FK506 binding protein 14 [Source:HGNC Symbol;Acc:HGNC:18625]"
233609_at;889;233609_at;;0	704800649;0	248104832;0	376065131;-0	654650011;0	447632227;3	244163269;0.00115667286042942 .;1 x 36; ;
218807_at;513;218807_at;VAV3;0	582111262;0	271135057;0	523952279;-0	506582223;0	446596665;3	234785629;0.00118742649500869 .;2 x 40;1 p13;"vav guanine nucleotide exchange factor 3 [Source:HGNC Symbol;Acc:HGNC:12659]"
243162_at;357;243162_at;;0	158466635;0	184607656;0	584269178;-0	158465866;0	446537329;3	234248795;0.00118921028257746 .;1 x 30; ;
237218_at;268;237218_at;;0	239698952;0	210890948;0	621724731;-0	239698952;0	445836258;3	227910028;0.00121046567882555 .;3 x 34; ;
211920_at;358;211920_at;CFB;0	59344003;0	193695725;0	584247645;-0	454783385;0	445569557;3	225500579;0.00121863919614806 .;1 x 31;CHR_HSCHR6_MHC_COX_CTG1 ;"complement factor B [Source:HGNC Symbol;Acc:HGNC:1037]"
236022_at;643;236022_at;MYO19;0	586406182;0	220297492;0	477071096;-0	583289815;0	44397054;3	211077084;0.00126867195076308 .;3 x 34;17 q12;"myosin XIX [Source:HGNC Symbol;Acc:HGNC:26234]"
238370_x_at;275;238370_x_at;;0	202766608;0	182743545;0	61898529;-0	202092609;0	443704467;3	208680757;0.00127717064547705 .;1 x 30; ;
1563032_at;270;1563032_at;;0	238157391;0	180113223;0	620887055;-0	237528523;0	443565149;3	20742644;0.0012816406123537 .;1 x 31; ;
225807_at;406;225807_at;AJUBA;0	098301636;0	139340417;0	561604724;-0	098301636;0	443452302;3	206410665;0.00128527134990453 .;1 x 30;14 q11;"ajuba LIM protein [Source:HGNC Symbol;Acc:HGNC:20250]"
234094_x_at;672;234094_x_at;DNAJC21;0	412992358;0	258755474;0	469143995;-0	412992358;0	443151419;3	203703241;0.00129499628035767 .;1 x 32;5 p13;"DnaJ heat shock protein family (Hsp40) member C21 [Source:HGNC Symbol;Acc:HGNC:27030]"
222856_at;894;222856_at;APLN;0	709332935;0	226780407;0	372842201;-0	529469146;0	441679223;3	190475398;0.00134352009355054 .;1 x 37;X q26;"apelin [Source:HGNC Symbol;Acc:HGNC:16665]"
1569552_at;8;1569552_at;;0	158504784;0	222094022;0	983711967;-0	158504784;0	441409605;3	188056327;0.00135257810079992 .;2 x 31; ;
205317_s_at;212;205317_s_at;SLC15A2;0	413760825;0	326751084;0	654970757;-0	413760825;0	441295919;3	187036634;0.00135641354332938 .;1 x 40;3 q13;"solute carrier family 15 member 2 [Source:HGNC Symbol;Acc:HGNC:10921]"
215618_at;847;215618_at;;0	483214685;0	218285305;0	397452582;-0	43264688;0	440614549;3	180929159;0.00137960229497103 .;1 x 35; ;
238309_x_at;470;238309_x_at;;0	158347024;0	165367283;0	540405309;-0	158308363;0	440287258;3	177997898;0.00139086437914937 .;1 x 31; ;
237997_s_at;466;237997_s_at;;0	169745735;0	18887746;0	542212293;-0	169745735;0	440196276;3	177183334;0.0013940093879703 .;2 x 33; ;
210341_at;644;210341_at;MYT1;0	516057014;0	212683844;0	47687413;-0	480392029;0	439984264;3	175285654;0.00140136238994359 .;2 x 35;20 q13;"myelin transcription factor 1 [Source:HGNC Symbol;Acc:HGNC:7622]"
217548_at;254;217548_at;ARPIN;0	504851591;0	22583479;0	627326993;-0	40724914;0	439224833;3	168493516;0.00142798182205139 .;1 x 33;15 q26;"actin related protein 2/3 complex inhibitor [Source:HGNC Symbol;Acc:HGNC:28782]"
1562428_at;984;1562428_at;LOC654780;0	708750398;0	159616777;0	300676721;-0	436234584;0	438630169;3	163180885;0.00144913531912105 .;3 x 33;16 q24;
1557024_at;13;1557024_at;;0	238389412;0	224063039;0	938473499;-0	238389412;0	436922671;3	147954931;0.00151141395559007 .;1 x 30;16 q21;
1559780_at;571;1559780_at;;0	314331413;0	215080501;0	501289903;-0	300943938;0	436669136;3	145697719;0.00152085906740984 .;1 x 33; ;
243866_x_at;610;243866_x_at;;0	36992683;0	229676248;0	487865634;-0	361147728;0	435532871;3	135592983;0.00156382900962648 .;1 x 33; ;
216612_x_at;73;216612_x_at;;0	184133311;0	212959983;0	770966612;-0	184117578;0	434629415;3	127571808;0.00159875214528071 .;1 x 30; ;
241265_x_at;600;241265_x_at;;0	232760255;0	185391661;0	49169521;-0	232489955;0	434413266;3	125654497;0.00160720819486948 .;2 x 33; ;
223158_s_at;909;223158_s_at;NEK6;0	867725438;0	197525315;0	363190981;-0	467607216;0	433915604;3	1212426;0.00162682688012605 .;1 x 38;9 q33;"NIMA related kinase 6 [Source:HGNC Symbol;Acc:HGNC:7749]"
1554476_x_at;749;1554476_x_at;ZNF808;0	460883783;0	198667264;0	441800095;-0	438686831;0	433859179;3	120742603;0.00162906444957001 .;3 x 32;19 q13;"zinc finger protein 808 [Source:HGNC Symbol;Acc:HGNC:33230]"
1558830_at;934;1558830_at;;0	690234003;0	160122436;0	343242346;-0	281510741;0	433240483;3	115263111;0.00165377713612536 .;3 x 33; ;
243930_x_at;46;243930_x_at;KRR1;0	288636396;0	222504089;0	820590039;-0	283954606;0	433224329;3	11512012;0.00165442674340854 .;1 x 30;12 q21;"KRR1	small subunit processome component homolog [Source:HGNC Symbol;Acc:HGNC:5176]"
236098_at;772;236098_at;SMIM6;0	110263681;0	152110871;0	428734909;-0	110263681;0	432763004;3	111038018;0.00167307345815515 .;1 x 30;17 q25;"small integral membrane protein 6 [Source:HGNC Symbol;Acc:HGNC:40032]"
217148_x_at;253;217148_x_at;;0	371476892;0	22402549;0	627376473;-0	371476892;0	432462471;3	108380332;0.00168531989941179 .;1 x 32;22 q11;"immunoglobulin lambda variable 2-14 [Source:HGNC Symbol;Acc:HGNC:5888]"
235817_at;737;235817_at;TMEM184A;0	55615656;0	230260378;0	446531862;-0	517116964;0	432105498;3	105225183;0.00169996836287911 .;1 x 34;7 p22;"transmembrane protein 184A [Source:HGNC Symbol;Acc:HGNC:28797]"
1561600_at;807;1561600_at;;0	198985621;0	172229838;0	412940927;-0	194998875;0	431973562;3	104059506;0.00170541057513796 .;2 x 32; ;
227432_s_at;1014;227432_s_at;;1	786546409;0	151718488;0	253012109;-0	438525112;0	431777654;3	102329073;0.0017135197713265 .;2 x 35; ;
238271_x_at;735;238271_x_at;;0	215966779;0	197930654;0	446789719;-0	211037166;0	431279109;3	097927929;0.00173430862826041 .;2 x 31; ;
213771_at;413;213771_at;IRF2BP1;0	550723059;0	192842587;0	558677294;-0	427351102;0	430997515;3	09544356;0.00174614831606501 .;1 x 31;19 q13;"interferon regulatory factor 2 binding protein 1 [Source:HGNC Symbol;Acc:HGNC:21728]"
231240_at;203;231240_at;;1	486257698;0	371212015;0	659790978;-0	93729572;0	4308568;3	09420252;0.00175209119474928 .;1 x 40; ;
230246_at;729;230246_at;PLAC9;0	152347598;0	173687793;0	449574742;-0	152347598;0	430403034;3	090202392;0.00177137631181057 .;1 x 32;10 q22;"placenta specific 9 [Source:HGNC Symbol;Acc:HGNC:19255]"
1556925_at;272;1556925_at;;0	149794754;0	167383535;0	620442428;-0	149782223;0	430354685;3	089776342;0.00177344210034647 .;3 x 34; ;
1554882_at;753;1554882_at;ERCC8;0	181995079;0	166644543;0	438437508;-0	180052909;0	429700758;3	08401722;0.00180158995973889 .;1 x 32;5 q12;"ERCC excision repair 8	CSA ubiquitin ligase complex subunit [Source:HGNC Symbol;Acc:HGNC:3439]"
240039_at;717;240039_at;PLA2R1;0	388382026;0	231917596;0	454524;-0	387980248;0	429663914;3	083692908;0.00180318749460118 .;1 x 33;2 q24;"phospholipase A2 receptor 1 [Source:HGNC Symbol;Acc:HGNC:9042]"
1558076_at;763;1558076_at;SLF1;0	319597723;0	211904688;0	434843555;-0	319466994;0	428635759;3	074650515;0.00184827054632863 .;1 x 33;5 q15;"SMC5-SMC6 complex localization factor 1 [Source:HGNC Symbol;Acc:HGNC:25408]"
231852_at;785;231852_at;ERI1;0	207678023;0	162923445;0	422294023;-0	200676406;0	428209309;3	070904277;0.00186725750114269 .;3 x 32;8 p23;"exoribonuclease 1 [Source:HGNC Symbol;Acc:HGNC:23994]"
242853_at;830;242853_at;;0	743930907;0	219211237;0	404055967;-0	669559696;0	426794626;3	058494671;0.00193147251209502 .;1 x 35; ;
204188_s_at;718;204188_s_at;RARG;0	288245036;0	237679086;0	453565315;-0	287971231;0	426481344;3	055750279;0.00194595156378319 .;1 x 33;12 q13;"retinoic acid receptor gamma [Source:HGNC Symbol;Acc:HGNC:9866]"
226424_at;233;226424_at;CAPS;0	606631897;0	238338058;0	639131823;-0	606607776;0	425726126;3	049139995;0.00198124679849532 .;1 x 31;19 p13;"calcyphosine [Source:HGNC Symbol;Acc:HGNC:1487]"
242718_at;615;242718_at;;0	451713487;0	20362209;0	486957544;-0	442510411;0	425337696;3	045743167;0.00199961730436859 .;1 x 31; ;
215417_at;211;215417_at;EXOC6B;0	394582069;0	213505994;0	65538202;-0	393740168;0	425153282;3	044131183;0.00200839105936113 .;1 x 30;2 p13;"exocyst complex component 6B [Source:HGNC Symbol;Acc:HGNC:17085]"
1560909_x_at;33;1560909_x_at;;0	459746523;0	248234797;0	851982522;-0	401478756;0	424755171;3	040652831;0.00202744660395626 .;1 x 31; ;
241502_x_at;173;241502_x_at;;0	215205219;0	196989759;0	676230715;-0	214213245;0	424335336;3	036987004;0.00204771306607465 .;1 x 30; ;
1555719_a_at;286;1555719_a_at;MAATS1;0	126002288;0	166324234;0	611795736;-0	126002288;0	424143415;3	035312023;0.00205703641106947 .;1 x 30;3 q13;"MYCBP associated and testis expressed 1 [Source:HGNC Symbol;Acc:HGNC:24010]"
221179_at;597;221179_at;PRORY;0	569549202;0	20828895;0	492975146;-0	559320735;0	423452555;3	029286702;0.00209090570123371 .;1 x 32;Y q11;"proline rich	Y-linked [Source:HGNC Symbol;Acc:HGNC:38732]"
222847_s_at;563;222847_s_at;EGLN3;0	490132754;0	243541055;0	503525658;-0	455478179;0	422546041;3	021390332;0.00213608609240401 .;2 x 40;14 q13;"egl-9 family hypoxia inducible factor 3 [Source:HGNC Symbol;Acc:HGNC:14661]"
203084_at;29;203084_at;TGFB1;0	329763847;0	29063079;0	869879992;-0	325624605;0	422523715;3	021195995;0.0021372094999087 .;1 x 30;19 q13;"transforming growth factor beta 1 [Source:HGNC Symbol;Acc:HGNC:11766]"
203780_at;369;203780_at;MPZL2;0	117272402;0	148535508;0	580505302;-0	117272402;0	422199194;3	018371968;0.0021535971493637 .;1 x 30;11 q23;"myelin protein zero like 2 [Source:HGNC Symbol;Acc:HGNC:3496]"
212545_s_at;810;212545_s_at;ZHX3;0	483632154;0	16662457;0	411999443;-0	344877476;0	421716663;3	014175539;0.00217816684750161 .;1 x 37;20 q12;"zinc fingers and homeoboxes 3 [Source:HGNC Symbol;Acc:HGNC:15935]"
232392_at;128;232392_at;;0	408667796;0	285008538;0	713977679;-0	408667796;0	421602226;3	01318077;0.00218402958635577 .;1 x 34; ;
213956_at;793;213956_at;CEP350;1	067034187;0	17753972;0	417154449;-0	39609273;0	420567075;3	004190427;0.00223769085343251 .;2 x 34;1 q25;"centrosomal protein 350 [Source:HGNC Symbol;Acc:HGNC:24238]"
225571_at;928;225571_at;LIFR;1	430351636;0	207882273;0	347399203;-0	522521938;0	420476571;3	003405079;0.00224243671302382 .;2 x 39;5 p13;"LIF receptor alpha [Source:HGNC Symbol;Acc:HGNC:6597]"
220237_at;236;220237_at;ATG3;0	42895287;0	25980122;0	637992777;-0	401986316;0	42024544;3	001399916;0.00225459679094597 .;1 x 33;3 q13;"autophagy related 3 [Source:HGNC Symbol;Acc:HGNC:20962]"
219214_s_at;998;219214_s_at;NT5C;0	671056226;0	182763605;0	284493274;-0	466737274;0	419549694;2	995368319;0.002291548721706 .;2 x 35;17 q25;"5'	3'-nucleotidase	cytosolic [Source:HGNC Symbol;Acc:HGNC:17144]"
1561564_at;172;1561564_at;;0	170655445;0	183262909;0	67801192;-0	166347049;0	418887924;2	989637201;0.0023271854697634 .;1 x 32; ;
1555444_a_at;606;1555444_a_at;;0	151067479;0	180846346;0	488648028;-0	150996659;0	418812037;2	988980366;0.002331302781577 .;1 x 30;Y q11;"protein phosphatase 1 regulatory subunit 12B pseudogene 1 [Source:HGNC Symbol;Acc:HGNC:18498]"
239140_at;54;239140_at;;0	202620794;0	211264793;0	807389839;-0	202620794;0	418809411;2	988957642;0.0023314453475326 .;1 x 30; ;
1560968_at;888;1560968_at;;0	193850919;0	158181387;0	376159934;-0	19373495;0	418099156;2	982813798;0.00237029179657289 .;2 x 31; ;
238906_s_at;702;238906_s_at;RHOJ;0	456295483;0	233085343;0	460261162;-0	405874739;0	418071577;2	982575369;0.00237181150153765 .;1 x 39;14 q23;"ras homolog family member J [Source:HGNC Symbol;Acc:HGNC:688]"
242506_at;787;242506_at;;0	63538095;0	258460522;0	419176536;-0	620383756;0	41694248;2	972822506;0.00243476315175373 .;1 x 34; ;
1553214_a_at;578;1553214_a_at;CCDC7;0	43580544;0	196170072;0	500307609;-0	391077195;0	415565772;2	960953364;0.00251348650658312 .;3 x 33;10 p11;"coiled-coil domain containing 7 [Source:HGNC Symbol;Acc:HGNC:26533]"
1554154_at;858;1554154_at;GDAP2;0	992249379;0	190886289;0	392065533;-0	325462576;0	415337755;2	958989919;0.00252673681433868 .;2 x 34;1 p12;"ganglioside induced differentiation associated protein 2 [Source:HGNC Symbol;Acc:HGNC:18010]"
236062_at;478;236062_at;;0	348993827;0	232738806;0	538685545;-0	348993827;0	415259963;2	958320208;0.00253127129936614 .;2 x 34; ;
230837_at;585;230837_at;;0	387634721;0	190627148;0	496149258;-0	307636545;0	414819875;2	954532974;0.00255705761952019 .;1 x 32;1 q21;
225683_x_at;215;225683_x_at;PHPT1;0	503762987;0	35097973;0	653459579;-0	503762987;0	413879481;2	946448693;0.00261292627737197 .;1 x 35;9 q34;"phosphohistidine phosphatase 1 [Source:HGNC Symbol;Acc:HGNC:30033]"
242012_at;506;242012_at;;0	372065028;0	214109672;0	526276351;-0	372065028;0	413868313;2	946352746;0.00261359614994894 .;1 x 32;X q26;
237931_at;670;237931_at;PRR5;0	187401658;0	181276203;0	469455519;-0	187401658;0	413506118;2	943242153;0.0026354006969973 .;1 x 32;22 q13;"proline rich 5 [Source:HGNC Symbol;Acc:HGNC:31682]"
211495_x_at;118;211495_x_at;TNFSF12-TNFSF13;0	244760923;0	26021031;0	719405946;-0	244760923;0	412952188;2	938488169;0.00266905408112517 .;1 x 39;17 p13;"TNFSF12-TNFSF13 readthrough [Source:HGNC Symbol;Acc:HGNC:33537]"
232648_at;695;232648_at;;0	316672802;0	181313543;0	462195043;-0	288138693;0	412584867;2	935337887;0.00269157585713375 .;2 x 33;14 q23;
244222_at;583;244222_at;;0	583924683;0	211504673;0	496644531;-0	58339975;0	412556313;2	935093071;0.00269333349853729 .;1 x 32; ;
211794_at;98;211794_at;FYB1;0	244531899;0	225722485;0	738245371;-0	244358575;0	412344609;2	933278275;0.00270639623875324 .;1 x 31;5 p13;"FYN binding protein 1 [Source:HGNC Symbol;Acc:HGNC:4036]"
1558999_x_at;139;1558999_x_at;;0	491577881;0	221117667;0	702990967;-0	470337685;0	412181355;2	931879196;0.00271650709128424 .;1 x 31;16 q23;
241402_at;584;241402_at;TSEN54;0	540129402;0	243967974;0	496426186;-0	493096628;0	411706222;2	927809284;0.00274612067170976 .;3 x 34;17 q25;"tRNA splicing endonuclease subunit 54 [Source:HGNC Symbol;Acc:HGNC:27561]"
227196_at;138;227196_at;RHPN2;0	784398304;0	322356989;0	703812838;-0	695077787;0	410867498;2	920631914;0.00279908136736728 .;1 x 40;19 q13;"rhophilin Rho GTPase binding protein 2 [Source:HGNC Symbol;Acc:HGNC:19974]"
242136_x_at;194;242136_x_at;;0	604418817;0	241542756;0	663717057;-0	604418398;0	410646419;2	91874152;0.00281318825314847 .;1 x 32; ;
1553792_at;710;1553792_at;KIAA1109;0	11911008;0	156968041;0	45764924;-0	119109599;0	410018486;2	913375596;0.00285359367153504 .;1 x 31;4 q27;"KIAA1109 [Source:HGNC Symbol;Acc:HGNC:26953]"
1553387_at;475;1553387_at;ATM;0	184168698;0	19445185;0	539861389;-0	184168698;0	409174246;2	906169087;0.00290871196246034 .;3 x 34;11 q22;"ATM serine/threonine kinase [Source:HGNC Symbol;Acc:HGNC:795]"
240582_x_at;120;240582_x_at;;0	23551745;0	21431377;0	717927109;-0	233060161;0	408479002;2	900241148;0.00295479473720961 .;1 x 31; ;
241065_x_at;748;241065_x_at;CMAS;1	047063321;0	169053557;0	441980049;-0	518560773;0	408293799;2	898663057;0.00296717690868586 .;3 x 33;12 p12;"cytidine monophosphate N-acetylneuraminic acid synthetase [Source:HGNC Symbol;Acc:HGNC:18290]"
224895_at;726;224895_at;YAP1;0	756988825;0	264555987;0	450417467;-0	690101099;0	407250043;2	889777351;0.00303780558259703 .;1 x 40;11 q22;"Yes associated protein 1 [Source:HGNC Symbol;Acc:HGNC:16262]"
231424_at;804;231424_at;SLC5A12;0	399991893;0	220680463;0	414153378;-0	392578183;0	405650367;2	876185313;0.00314888322187312 .;1 x 34;11 p14;"solute carrier family 5 member 12 [Source:HGNC Symbol;Acc:HGNC:28750]"
206593_s_at;197;206593_s_at;MED22;0	552345012;0	199655166;0	661471239;-0	442752202;0	405546701;2	875305581;0.00315620152610574 .;3 x 32;9 q34;"mediator complex subunit 22 [Source:HGNC Symbol;Acc:HGNC:11477]"
205774_at;271;205774_at;F12;0	554845741;0	301533633;0	620692017;-0	553854818;0	405174274;2	872146187;0.00318261478918258 .;1 x 34;5 q35;"coagulation factor XII [Source:HGNC Symbol;Acc:HGNC:3530]"
242383_at;479;242383_at;;0	253471158;0	220960903;0	538613194;-0	253469973;0	404617687;2	867427706;0.0032224462096031 .;1 x 33; ;
209670_at;627;209670_at;;0	423592949;0	240372069;0	482818377;-0	423592949;0	404318434;2	864892355;0.00324403994325162 .;1 x 35;14 q11;"T-cell receptor alpha constant [Source:HGNC Symbol;Acc:HGNC:12029]"
217067_s_at;277;217067_s_at;DMP1;0	35267659;0	238260822;0	617441722;-0	342942509;0	402614258;2	850475053;0.0033694173781571 .;1 x 32;4 q22;"dentin matrix acidic phosphoprotein 1 [Source:HGNC Symbol;Acc:HGNC:2932]"
1552974_at;795;1552974_at;;0	103605793;0	139156564;0	41634089;-0	103605793;0	401954761;2	844905226;0.00341905124967012 .;2 x 31; ;
236499_at;566;236499_at;FAAP20;0	420252417;0	209814168;0	501685829;-0	362333231;0	399631154;2	82532302;0.00359900414219139 .;3 x 34;1 p36;"Fanconi anemia core complex associated protein 20 [Source:HGNC Symbol;Acc:HGNC:26428]"
243473_at;381;243473_at;;0	300161969;0	222347107;0	57484096;-0	300136223;0	399456025;2	823849754;0.00361289300982237 .;1 x 30; ;
241274_at;722;241274_at;;0	209165962;0	170577674;0	452740953;-0	209165962;0	399342209;2	822892484;0.00362194412555916 .;1 x 32; ;
203568_s_at;501;203568_s_at;TRIM38;0	268598823;0	189616867;0	528377526;-0	259193325;0	397892687;2	810714506;0.00373894289144028 .;1 x 31;6 p22;"tripartite motif containing 38 [Source:HGNC Symbol;Acc:HGNC:10059]"
242622_x_at;485;242622_x_at;PTEN;0	451965731;0	218126361;0	535937945;-0	385449575;0	39687172;2	802152001;0.00382329780235402 .;1 x 31;10 q23;"phosphatase and tensin homolog [Source:HGNC Symbol;Acc:HGNC:9588]"
203876_s_at;310;203876_s_at;MMP11;0	135999002;0	187477986;0	603376817;-0	135840206;0	396213118;2	796635086;0.00387858093092408 .;1 x 32;22 q11;"matrix metallopeptidase 11 [Source:HGNC Symbol;Acc:HGNC:7157]"
204129_at;541;204129_at;BCL9;0	63241713;0	20372743;0	514205762;-0	579974328;0	396151118;2	79611599;0.00388382062231241 .;1 x 31;1 q21;"B-cell CLL/lymphoma 9 [Source:HGNC Symbol;Acc:HGNC:1008]"
1568764_x_at;204;1568764_x_at;;0	25921814;0	225148316;0	658815492;-0	254817775;0	395702592;2	792362082;0.00392190808114945 .;1 x 30;5 p15;
207281_x_at;151;207281_x_at;VCX3A;0	480261061;0	263757211;0	692411175;-0	468360688;0	395017362;2	786631667;0.00398071812635725 .;1 x 32;X p22;"variable charge	X-linked 3A [Source:HGNC Symbol;Acc:HGNC:18159]"
238713_at;353;238713_at;;0	334461591;0	2156849;0	585801907;-0	311482731;0	394494662;2	78226415;0.00402608917499581 .;1 x 31; ;
238525_at;756;238525_at;;0	699787259;0	177409989;0	437065066;-0	460168858;0	394245608;2	780184264;0.00404786377657251 .;2 x 33; ;
1570082_x_at;220;1570082_x_at;HIPK1-AS1;0	216785187;0	211838399;0	651215158;-0	210685107;0	392749117;2	767702075;0.00418085172861826 .;1 x 32;1 p13;"HIPK1 antisense RNA 1 [Source:HGNC Symbol;Acc:HGNC:50576]"
215390_at;779;215390_at;;0	175055505;0	162714694;0	423519057;-0	175055505;0	392469668;2	765374085;0.00420609818897921 .;3 x 34; ;
211913_s_at;524;211913_s_at;MERTK;0	270509051;0	252270347;0	520919642;-0	270509051;0	392446608;2	765182023;0.00420818735058126 .;2 x 40;2 q13;"MER proto-oncogene	tyrosine kinase [Source:HGNC Symbol;Acc:HGNC:7027]"
241789_at;712;241789_at;RBMS3;0	337618769;0	203876952;0	457118268;-0	337187181;0	39067373;2	750434312;0.00437150654532759 .;2 x 35;3 p24;"RNA binding motif single stranded interacting protein 3 [Source:HGNC Symbol;Acc:HGNC:13427]"
1556487_a_at;569;1556487_a_at;MAATS1;0	134935304;0	170367628;0	501437645;-0	13482776;0	389834895;2	743469061;0.00445066360250412 .;1 x 31;3 q13;"MYCBP associated and testis expressed 1 [Source:HGNC Symbol;Acc:HGNC:24010]"
241864_x_at;623;241864_x_at;;0	64548992;0	199095541;0	483976457;-0	46841759;0	388124701;2	72929341;0.00461587481336978 .;2 x 31; ;
1557350_at;185;1557350_at;G3BP1;0	424806665;0	229724905;0	668565396;-0	375575699;0	386251844;2	713807529;0.00480282288728595 .;1 x 34;5 q33;"G3BP stress granule assembly factor 1 [Source:HGNC Symbol;Acc:HGNC:30292]"
214532_x_at;845;214532_x_at;POU5F1B;0	776579199;0	179635474;0	39788305;-0	307190021;0	385384145;2	706646272;0.00489161791400106 .;1 x 32;8 q24;"POU class 5 homeobox 1B [Source:HGNC Symbol;Acc:HGNC:9223]"
1563941_at;630;1563941_at;;0	348184759;0	249728568;0	480510343;-0	347801363;0	384889508;2	702567733;0.00494286401708932 .;1 x 34; ;
231831_at;602;231831_at;COX19;0	713322818;0	218002156;0	489534564;-0	387026566;0	38394715;2	694805066;0.00504177174982834 .;3 x 32;7 p22;"COX19	cytochrome c oxidase assembly factor [Source:HGNC Symbol;Acc:HGNC:28074]"
236450_at;782;236450_at;;0	335551832;0	245330688;0	42303298;-0	335551832;0	383621588;2	692125549;0.00507633435247201 .;2 x 33; ;
217662_x_at;20;217662_x_at;;0	668009788;0	277156828;0	893630489;-0	519057151;0	383183743;2	688523749;0.0051231376152755 .;3 x 34; ;
1570087_at;799;1570087_at;;0	376520198;0	200382641;0	415564155;-0	328513014;0	383044834;2	687381495;0.00513806341867817 .;3 x 34; ;
206368_at;108;206368_at;CPLX2;0	229336765;0	273834696;0	729697816;-0	229336765;0	382036291;2	67909464;0.00524755365684126 .;2 x 35;5 q35;"complexin 2 [Source:HGNC Symbol;Acc:HGNC:2310]"
1557185_at;160;1557185_at;TPCN1;0	367923132;0	218677773;0	685646859;-0	367642964;0	381982598;2	67865378;0.00525343832730774 .;1 x 31;12 q24;"two pore segment channel 1 [Source:HGNC Symbol;Acc:HGNC:18182]"
1561789_at;557;1561789_at;;0	151083789;0	174688633;0	50538536;-0	150712327;0	381725435;2	676542707;0.00528170163091213 .;1 x 32; ;
1556743_at;504;1556743_at;ZNF654;0	472755887;0	190763091;0	527564391;-0	420944252;0	381357712;2	673525299;0.0053223423084241 .;1 x 32;3 p11;"zinc finger protein 654 [Source:HGNC Symbol;Acc:HGNC:25612]"
204271_s_at;707;204271_s_at;EDNRB;1	497766047;0	254863245;0	458095407;-0	760195359;0	380809007;2	669025581;0.00538348308761305 .;1 x 40;13 q22;"endothelin receptor type B [Source:HGNC Symbol;Acc:HGNC:3180]"
207475_at;512;207475_at;FABP2;0	560223968;0	29102726;0	524744534;-0	560223968;0	380194154;2	663987325;0.00545270841852097 .;1 x 32;4 q26;"fatty acid binding protein 2 [Source:HGNC Symbol;Acc:HGNC:3556]"
1564004_at;828;1564004_at;;0	250839707;0	19330607;0	404485095;-0	250839707;0	379961786;2	662084317;0.00547906815160726 .;1 x 30; ;
240068_at;510;240068_at;LINC00323;0	143961886;0	15462644;0	525348192;-0	143955263;0	379607972;2	659187852;0.00551941404501199 .;1 x 31;21 q22;"long intergenic non-protein coding RNA 323 [Source:HGNC Symbol;Acc:HGNC:19720]"
234133_s_at;521;234133_s_at;TMEM116;0	204064139;0	183423486;0	521508673;-0	200898415;0	379297701;2	656648958;0.00555500385038687 .;3 x 33;12 q24;"transmembrane protein 116 [Source:HGNC Symbol;Acc:HGNC:25084]"
241384_x_at;246;241384_x_at;GK5;0	302964104;0	211519526;0	629707834;-0	296127177;0	378800211;2	652580279;0.00561247849229018 .;1 x 32;3 q23;"glycerol kinase 5 (putative) [Source:HGNC Symbol;Acc:HGNC:28635]"
232597_x_at;679;232597_x_at;SCAF11;1	452155094;0	158722724;0	466997437;-0	365162162;0	377350552;2	640739657;0.00578286669731209 .;3 x 32;12 q12;"SR-related CTD associated factor 11 [Source:HGNC Symbol;Acc:HGNC:10784]"
1568867_x_at;9;1568867_x_at;;0	43256479;0	259205229;0	983235239;-0	417809786;0	37503635;2	621884401;0.00606403299261171 .;1 x 30; ;
209661_at;664;209661_at;KIFC3;0	232504742;0	201573681;0	471134812;-0	232504742;0	373986382;2	613348504;0.00619539987395923 .;3 x 34;16 q21;"kinesin family member C3 [Source:HGNC Symbol;Acc:HGNC:6326]"
204436_at;269;204436_at;PLEKHO2;0	599043374;0	300323303;0	621086927;-0	59334764;0	373910746;2	612734063;0.0062049560956754 .;1 x 40;15 q22;"pleckstrin homology domain containing O2 [Source:HGNC Symbol;Acc:HGNC:30026]"
214358_at;104;214358_at;ACACA;0	139324894;0	19079789;0	731948209;-0	139324894;0	373384357;2	60845951;0.0062718120586025 .;1 x 30;17 q12;"acetyl-CoA carboxylase alpha [Source:HGNC Symbol;Acc:HGNC:84]"
206178_at;558;206178_at;PLA2G5;0	517817823;0	271138458;0	505346804;-0	482181962;0	373343289;2	608126143;0.00627705373083731 .;1 x 40;1 p36;"phospholipase A2 group V [Source:HGNC Symbol;Acc:HGNC:9038]"
230826_at;308;230826_at;MMD2;0	866638627;0	352554651;0	603638378;-0	86255704;0	370922951;2	588510363;0.00659264680852778 .;1 x 40;7 p22;"monocyte to macrophage differentiation associated 2 [Source:HGNC Symbol;Acc:HGNC:30133]"
230235_at;736;230235_at;MCTS1;0	996406192;0	155976725;0	446700919;-0	300400848;0	370579397;2	585730981;0.00663852077515781 .;3 x 33;X q24;"MCTS1	re-initiation and release factor [Source:HGNC Symbol;Acc:HGNC:23357]"
1558107_at;58;1558107_at;;0	140024696;0	205909179;0	800981172;-0	139685188;0	369808397;2	579498;0.00674246123396727 .;1 x 30; ;
234135_x_at;177;234135_x_at;;0	6751819;0	280207821;0	673141371;-0	569286311;0	369693146;2	578566807;0.0067581169626435 .;2 x 34;4 q32;"RNA	U6 small nuclear 853	pseudogene [Source:HGNC Symbol;Acc:HGNC:47816]"
1562582_at;408;1562582_at;;0	167492771;0	181253131;0	560132062;-0	16745527;0	368086666;2	56560129;0.00697958394927711 .;2 x 32; ;
229103_at;250;229103_at;WNT3;0	66505854;0	270094577;0	628032596;-0	58807773;0	367780556;2	563133775;0.00702247645080201 .;3 x 33;CHR_HSCHR17_2_CTG5 ;"Wnt family member 3 [Source:HGNC Symbol;Acc:HGNC:12782]"
228676_at;849;228676_at;ORAOV1;0	540751178;0	200400553;0	395760923;-0	534873199;0	367347302;2	559643006;0.00708356766948692 .;1 x 33;11 q13;"oral cancer overexpressed 1 [Source:HGNC Symbol;Acc:HGNC:17589]"
204727_at;781;204727_at;WDHD1;0	237341095;0	16789945;0	423122238;-0	237243457;0	366539244;2	553137551;0.00719871598971344 .;3 x 32;14 q22;"WD repeat and HMG-box DNA binding protein 1 [Source:HGNC Symbol;Acc:HGNC:23170]"
241851_x_at;145;241851_x_at;;0	438944207;0	274910523;0	696630557;-0	438569961;0	366505255;2	552864062;0.00720359406474813 .;1 x 31; ;
1565765_x_at;764;1565765_x_at;;0	806416181;0	17774437;0	433622545;-0	509259954;0	365375429;2	543779717;0.00736735254277043 .;2 x 32; ;
241298_x_at;427;241298_x_at;RCL1;0	465259996;0	226879253;0	55356146;-0	458753603;0	365198614;2	542359216;0.00739326422450937 .;1 x 34;9 p24;"RNA terminal phosphate cyclase like 1 [Source:HGNC Symbol;Acc:HGNC:17687]"
243204_at;67;243204_at;;0	292306103;0	223515036;0	79045058;-0	291655553;0	364897179;2	53993827;0.00743761703561641 .;1 x 30;15 q13;"long intergenic non-protein coding RNA 2352 [Source:HGNC Symbol;Acc:HGNC:53274]"
242171_at;539;242171_at;;0	813347526;0	216755911;0	514431259;-0	599626422;0	364064978;2	533259308;0.00756124051635498 .;3 x 33; ;
208345_s_at;835;208345_s_at;POU3F1;0	415166185;0	206686965;0	401938049;-0	405939686;0	362597037;2	521495149;0.00778355471468573 .;3 x 34;1 p34;"POU class 3 homeobox 1 [Source:HGNC Symbol;Acc:HGNC:9214]"
215212_at;697;215212_at;;0	679607684;0	207947181;0	461418581;-0	642973668;0	361736335;2	514607497;0.00791646374500554 .;2 x 32; ;
221259_s_at;94;221259_s_at;TEX11;0	209689477;0	196184338;0	74396146;-0	209686156;0	361626812;2	513731581;0.00793351342012472 .;1 x 30;X q13;"testis expressed 11 [Source:HGNC Symbol;Acc:HGNC:11733]"
241330_x_at;590;241330_x_at;;0	103078468;0	127270788;0	494294325;-0	103078468;0	360939975;2	508241315;0.00804114522106802 .;1 x 30; ;
235266_at;942;235266_at;ATAD2;0	450195739;0	172745289;0	336782942;-0	414592308;0	360229352;2	502565863;0.0081538034641182 .;2 x 31;8 q24;"ATPase family	AAA domain containing 2 [Source:HGNC Symbol;Acc:HGNC:30123]"
217481_x_at;549;217481_x_at;;0	200914019;0	184436703;0	509900838;-0	200914019;0	359860372;2	499620937;0.00821282486103891 .;1 x 30;17 p12;
1557437_a_at;562;1557437_a_at;;0	356084699;0	199042582;0	503971241;-0	330541468;0	359792746;2	499081348;0.0082236811963976 .;2 x 32; ;
243461_at;586;243461_at;;0	631563782;0	20842831;0	496042627;-0	528626893;0	358772238;2	490944114;0.0083889902830202 .;2 x 31; ;
1553440_at;649;1553440_at;;0	147652101;0	202278535;0	476212566;-0	147652101;0	358370913;2	487746874;0.00845476539714518 .;1 x 31;18 q11;"AQP4 antisense RNA 1 [Source:HGNC Symbol;Acc:HGNC:26399]"
243625_at;449;243625_at;;0	214102915;0	171404267;0	548001556;-0	197307086;0	358026176;2	485001725;0.00851161359614983 .;1 x 30; ;
1562169_at;658;1562169_at;;0	162918228;0	174880208;0	472553608;-0	162904009;0	354780861;2	459216033;0.00906279894361806 .;1 x 31; ;
240000_at;243;240000_at;;0	688191962;0	235752466;0	630521547;-0	538714283;0	354080559;2	45366517;0.00918560790918987 .;3 x 33; ;
1555437_at;674;1555437_at;EARS2;0	513310092;0	209152833;0	46831974;-0	501252667;0	34857459;2	410185874;0.0102009538869909 .;1 x 31;16 p12;"glutamyl-tRNA synthetase 2	mitochondrial [Source:HGNC Symbol;Acc:HGNC:29419]"
224029_x_at;80;224029_x_at;SCN11A;0	169750595;0	221392623;0	760146468;-0	169750595;0	348301419;2	408036171;0.010253691267917 .;1 x 30;3 p22;"sodium voltage-gated channel alpha subunit 11 [Source:HGNC Symbol;Acc:HGNC:10583]"
243906_at;544;243906_at;;0	601677319;0	212561411;0	512529318;-0	379999036;0	347335076;2	400437174;0.0104420926771975 .;1 x 31; ;
216842_x_at;445;216842_x_at;;0	372856341;0	259546924;0	548538661;-0	372856341;0	346612797;2	394763099;0.0105848014742145 .;1 x 32;Y p11;
1558053_s_at;675;1558053_s_at;;0	365629772;0	184474161;0	46773228;-0	359445413;0	346287594;2	392209949;0.0106495880401267 .;3 x 33; ;
220553_s_at;974;220553_s_at;PRPF39;1	21669766;0	157079059;0	309943266;-0	308151334;0	345984561;2	389831746;0.0107102569040536 .;3 x 33;14 q21;"pre-mRNA processing factor 39 [Source:HGNC Symbol;Acc:HGNC:20314]"
1565920_at;659;1565920_at;;0	138533831;0	161135159;0	472093367;-0	138533831;0	34549791;2	386014276;0.0108082940128189 .;1 x 31; ;
1561953_at;329;1561953_at;;0	261308648;0	216249068;0	59502589;-0	257835306;0	342150212;2	35981266;0.0115032993912958 .;1 x 31; ;
237937_x_at;436;237937_x_at;;0	788238324;0	205716014;0	551736313;-0	434398867;0	340967495;2	350580238;0.0117576127727559 .;2 x 33; ;
1557520_a_at;346;1557520_a_at;;0	314881208;0	230926249;0	589236832;-0	307762279;0	33729081;2	321959963;0.012578400730605 .;1 x 30; ;
1567044_s_at;488;1567044_s_at;;0	481870653;0	236932197;0	534764261;-0	406498377;0	335722884;2	309791408;0.0129426811534208 .;3 x 33; ;
1559479_at;876;1559479_at;;0	492036876;0	217507058;0	384258554;-0	366487583;0	335695091;2	309575901;0.0129492169173293 .;3 x 33;4 p15;
1560327_at;137;1560327_at;;0	483366021;0	338387751;0	704627401;-0	483195621;0	33368423;2	294001904;0.0134294318107004 .;1 x 40; ;
1568858_at;741;1568858_at;;0	346160758;0	194037365;0	445197948;-0	332337608;0	33117082;2	27458519;0.0140504049839496 .;3 x 32;16 p12;
1558667_at;454;1558667_at;;0	134688509;0	17517689;0	546315588;-0	133920009;0	33094977;2	272880138;0.0141061407901382 .;1 x 30;17 p13;
243062_at;117;243062_at;FLCN;0	247087312;0	237496636;0	719699763;-0	247057996;0	327879843;2	249243711;0.0148993632500758 .;1 x 30;17 p11;"folliculin [Source:HGNC Symbol;Acc:HGNC:27310]"
235577_at;503;235577_at;;0	766261451;0	214999156;0	527707553;-0	507427072;0	322573493;2	208575866;0.0163574620541456 .;2 x 33; ;
1561899_at;169;1561899_at;CLECL1;0	356843372;0	241887795;0	679342885;-0	355442348;0	319935267;2	188443395;0.0171250893631678 .;1 x 31;12 p13;"C-type lectin like 1 [Source:HGNC Symbol;Acc:HGNC:24462]"
1556282_at;258;1556282_at;FGFR1OP2;0	337840751;0	226255906;0	626255558;-0	325740566;0	318527313;2	177722463;0.0175467414492014 .;1 x 31;12 p11;"FGFR1 oncogene partner 2 [Source:HGNC Symbol;Acc:HGNC:23098]"
210456_at;426;210456_at;PCYT1B;0	309854789;0	187404691;0	55364329;-0	300182004;0	317609383;2	170741491;0.0178262126505864 .;1 x 30;X p22;"phosphate cytidylyltransferase 1	choline	beta [Source:HGNC Symbol;Acc:HGNC:8755]"
238456_at;130;238456_at;;0	404301773;0	24049783;0	713119077;-0	395356878;0	315506996;2	154778091;0.0184801048220609 .;2 x 31; ;
1552518_s_at;409;1552518_s_at;MTBP;0	339168284;0	200088963;0	559653022;-0	300841688;0	315342862;2	153533307;0.0185319720351389 .;1 x 31;8 q24;"MDM2 binding protein [Source:HGNC Symbol;Acc:HGNC:7417]"
1570388_a_at;64;1570388_a_at;;0	50818156;0	358610485;0	794916845;-0	50818156;0	314443084;2	146713273;0.0188184317489023 .;1 x 32;9 p11;
244638_at;745;244638_at;SUCLG1;0	365322094;0	203503174;0	443096837;-0	335511197;0	31407079;2	143893275;0.018938015152362 .;1 x 31;2 p11;"succinate-CoA ligase alpha subunit [Source:HGNC Symbol;Acc:HGNC:11449]"
235666_at;85;235666_at;ITGA8;0	650238083;0	248851544;0	755645919;-0	638000645;0	312213288;2	129839723;0.0195439982021766 .;3 x 32;10 p13;"integrin subunit alpha 8 [Source:HGNC Symbol;Acc:HGNC:6144]"
244550_at;226;244550_at;;0	278925972;0	189119609;0	645018474;-0	278925972;0	308899151;2	10483256;0.0206645645507042 .;1 x 30; ;
226499_at;291;226499_at;;1	063016577;0	237241422;0	61062887;-0	780068454;0	307744309;2	096138566;0.0210671419663035 .;2 x 39; ;
228996_at;28;228996_at;RC3H1;0	3253601;0	362780677;0	876958673;-0	3253601;0	306376533;2	085854778;0.0215521955783287 .;1 x 32;1 q25;"ring finger and CCCH-type domains 1 [Source:HGNC Symbol;Acc:HGNC:29434]"
209546_s_at;689;209546_s_at;APOL1;0	650806578;0	216250931;0	463731913;-0	514827009;0	302677136;2	058111566;0.0229098217449626 .;1 x 31;22 q12;"apolipoprotein L1 [Source:HGNC Symbol;Acc:HGNC:618]"
237032_x_at;580;237032_x_at;SIPA1L1;0	182466879;0	181771249;0	498537219;-0	182460873;0	298977014;2	030465354;0.0243363474365452 .;1 x 31;14 q24;"signal induced proliferation associated 1 like 1 [Source:HGNC Symbol;Acc:HGNC:20284]"
1570255_s_at;375;1570255_s_at;;0	394206767;0	252965277;0	579003751;-0	394092963;0	297994232;2	023139275;0.0247270837537119 .;3 x 34;21 p11;
1557224_at;837;1557224_at;;0	657778384;0	249514728;0	400941535;-0	482026422;0	29550337;2	004602877;0.0257401536476081 .;1 x 32;12 p11;
214310_s_at;190;214310_s_at;ZFPL1;0	437282254;0	248340598;0	667431088;-0	437282254;0	284610011;1	924056127;0.0305706804130397 .;1 x 30;11 q13;"zinc finger protein like 1 [Source:HGNC Symbol;Acc:HGNC:12868]"
1559060_a_at;762;1559060_a_at;FNIP1;0	300174948;0	23451989;0	43518076;-0	300174948;0	284195476;1	921007315;0.0307678813098989 .;2 x 32;5 q31;"folliculin interacting protein 1 [Source:HGNC Symbol;Acc:HGNC:29418]"
235902_at;612;235902_at;;1	080659677;0	258048296;0	487207729;-0	668516501;0	282365434;1	907561724;0.0316506231807692 .;2 x 33;15 q13;
212816_s_at;591;212816_s_at;CBS;0	927499452;0	323814244;0	494273821;-0	909324348;0	273928412;1	845863118;0.0359842639223061 .;2 x 40;21 q22;"cystathionine-beta-synthase [Source:HGNC Symbol;Acc:HGNC:1550]"
202626_s_at;183;202626_s_at;LYN;0	759022443;0	337282062;0	670053779;-0	639932262;0	270566895;1	821410354;0.0378361261059678 .;1 x 40;8 q12;"LYN proto-oncogene	Src family tyrosine kinase [Source:HGNC Symbol;Acc:HGNC:6735]"
244610_x_at;972;244610_x_at;;1	138368126;0	158608543;0	310867262;-0	488247737;0	270303656;1	819498519;0.0379842508760696 .;3 x 33; ;
211527_x_at;22;211527_x_at;VEGFA;0	431457842;0	289570795;0	890303908;-0	431449053;0	267307722;1	797770716;0.0397023741549589 .;1 x 39;6 p21;"vascular endothelial growth factor A [Source:HGNC Symbol;Acc:HGNC:12680]"
232772_at;368;232772_at;;0	367974392;0	221021182;0	580513319;-0	314740525;0	264945225;1	780676511;0.0410996933205552 .;1 x 31; ;
238905_at;925;238905_at;RHOJ;0	586824715;0	201338537;0	353548988;-0	585011884;0	258148862;1	731691244;0.045334332097879 .;2 x 39;14 q23;"ras homolog family member J [Source:HGNC Symbol;Acc:HGNC:688]"
233519_at;457;233519_at;;0	860208935;0	258472739;0	545875256;-0	797172593;0	25716464;1	724620468;0.0459746293232424 .;1 x 38; ;
1558444_at;195;1558444_at;;0	273041607;0	315123763;0	663207504;-0	273041607;0	246794082;1	650460587;0.0531541924402801 .;1 x 30; ;
1552961_at;377;1552961_at;;0	63498125;0	230767677;0	576608104;-0	547901819;0	237132909;1	581917583;0.0605853513229591 .;1 x 30;8 q24;
228326_at;507;228326_at;WDR27;0	547401999;0	282234892;0	525856628;-0	5406988;0	232532446;1	549455158;0.0643877856152851 .;2 x 32;6 q27;"WD repeat domain 27 [Source:HGNC Symbol;Acc:HGNC:21248]"
224522_s_at;162;224522_s_at;DCAKD;0	611825871;0	298272836;0	68421479;-0	611345788;0	231002354;1	538682815;0.0656912472008677 .;2 x 33;17 q21;"dephospho-CoA kinase domain containing [Source:HGNC Symbol;Acc:HGNC:26238]"
204590_x_at;725;204590_x_at;VPS33A;0	617089989;0	219306331;0	450739707;-0	596691405;0	184973915;1	219817848;0.114669770522122 .;1 x 30;12 q24;"VPS33A	CORVET/HOPS core subunit [Source:HGNC Symbol;Acc:HGNC:18179]"
1558253_x_at;218;1558253_x_at;ZNF587;0	350749068;0	209506393;0	652396474;-0	35074624;0	157578396;1	034144834;0.153493272243813 .;1 x 30;19 q13;"zinc finger protein 587 [Source:HGNC Symbol;Acc:HGNC:30955]"
