# Supplementary figures and images for: The Transcriptome and Methylome of the Developing and Aging Brain and Their Relations to Gliomas and Psychological Disorders
Source: MDPI journal article supplement (doi:10.3390/cells11030362), 2022-01-21

Toll-like receptor signaling pathway

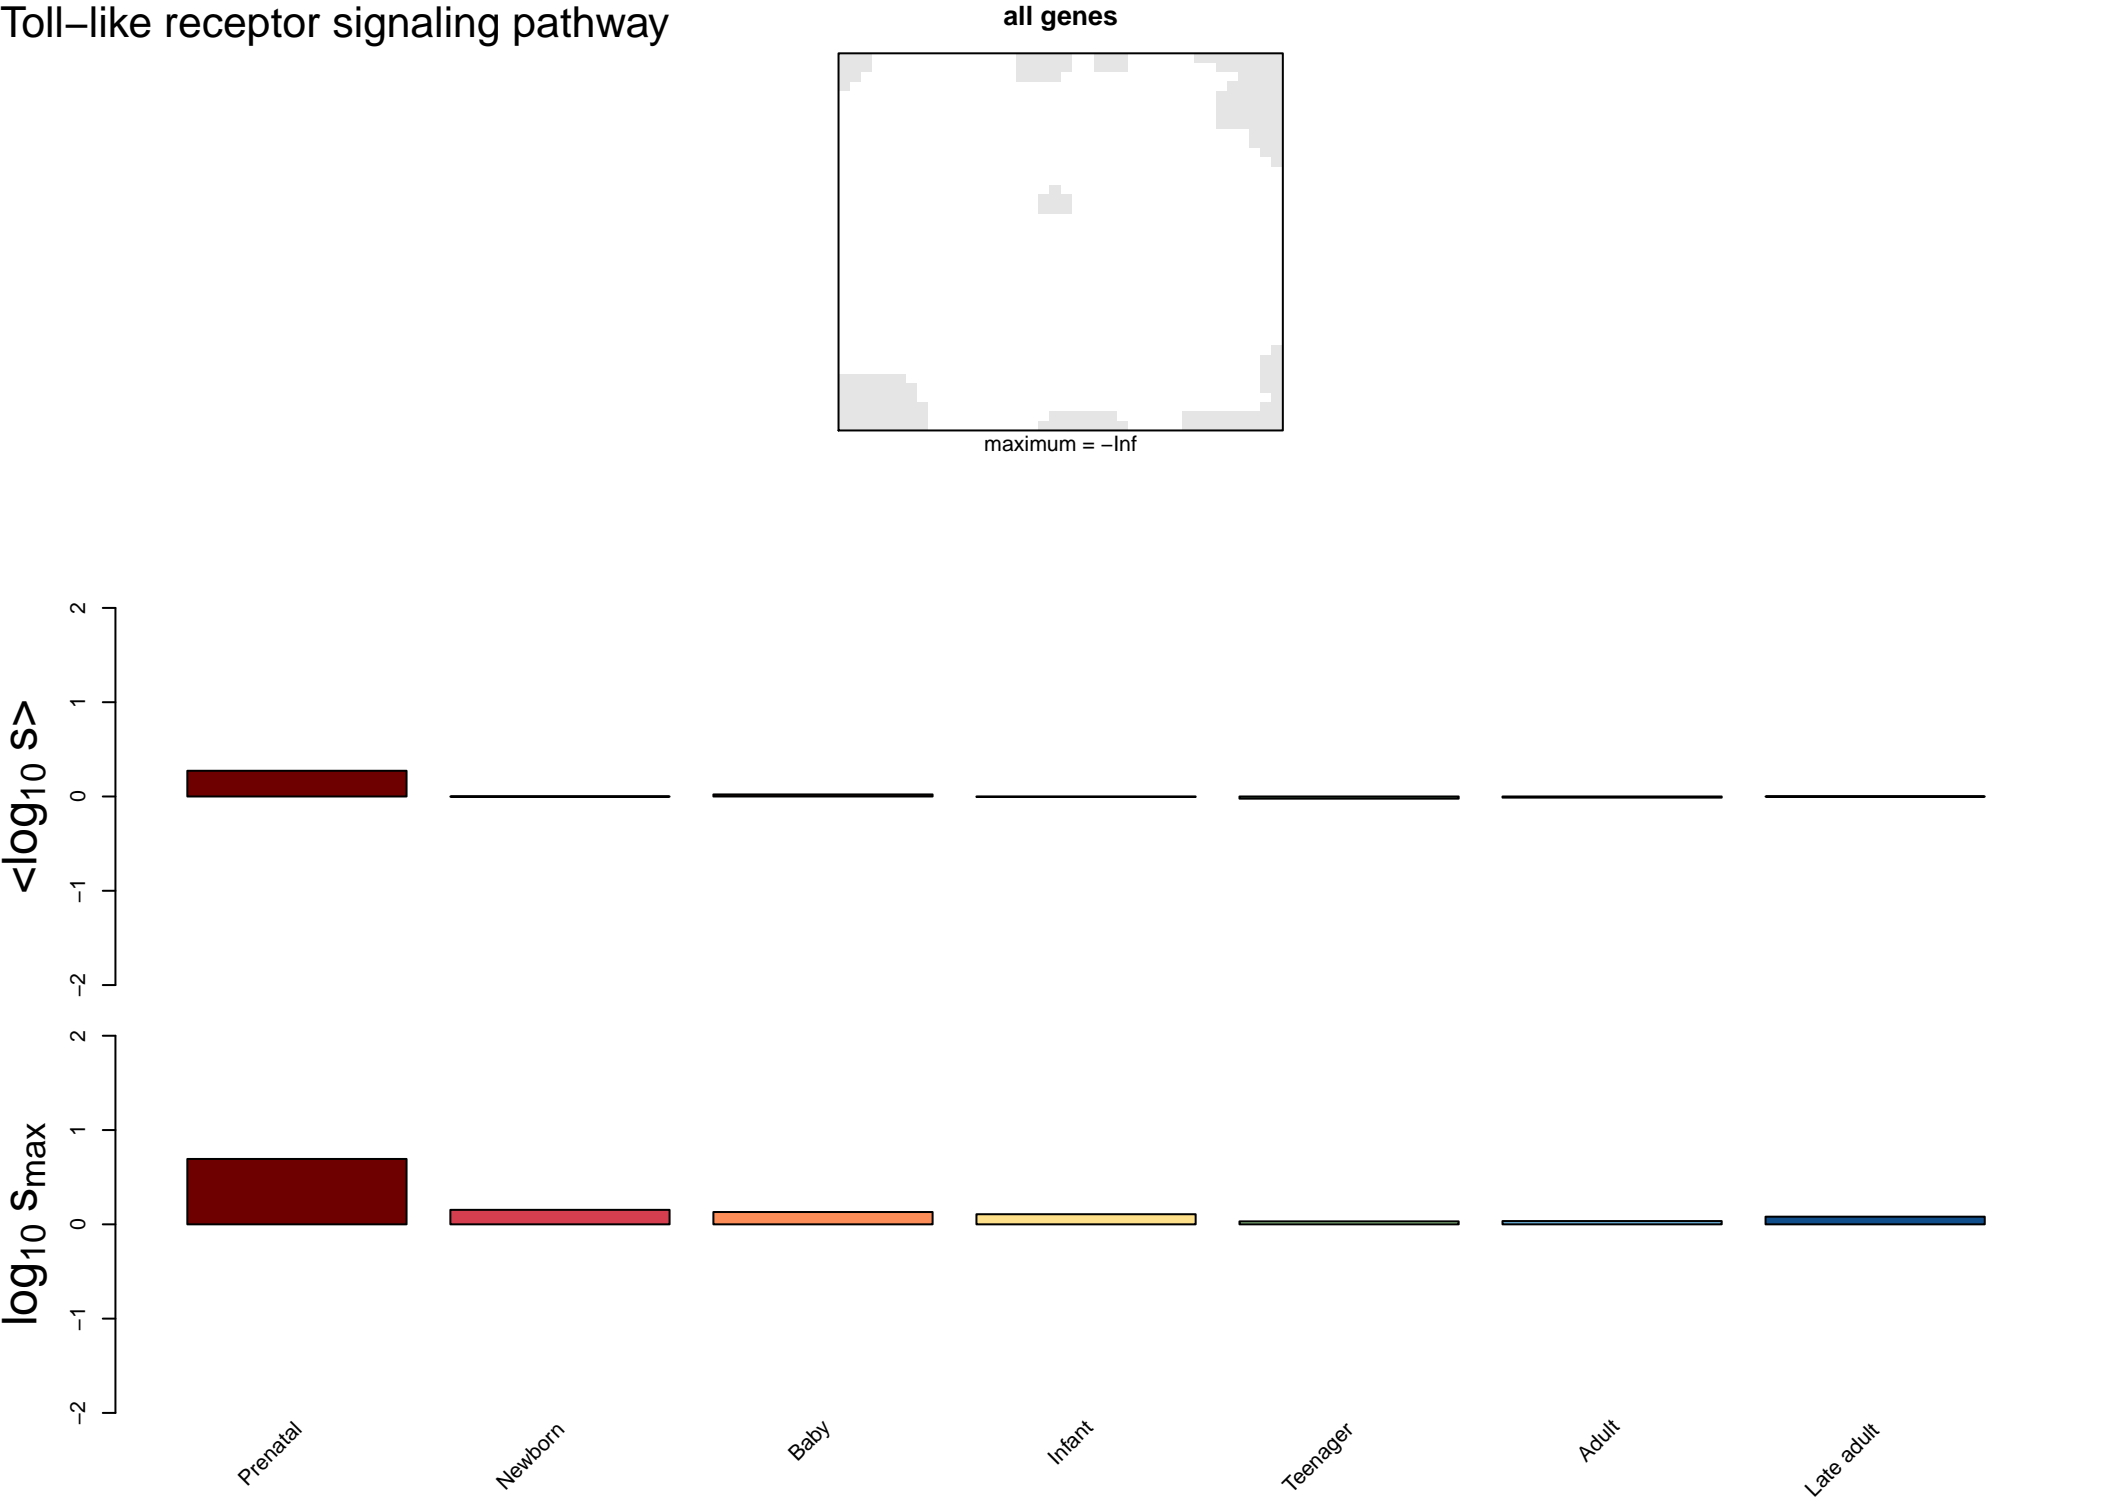

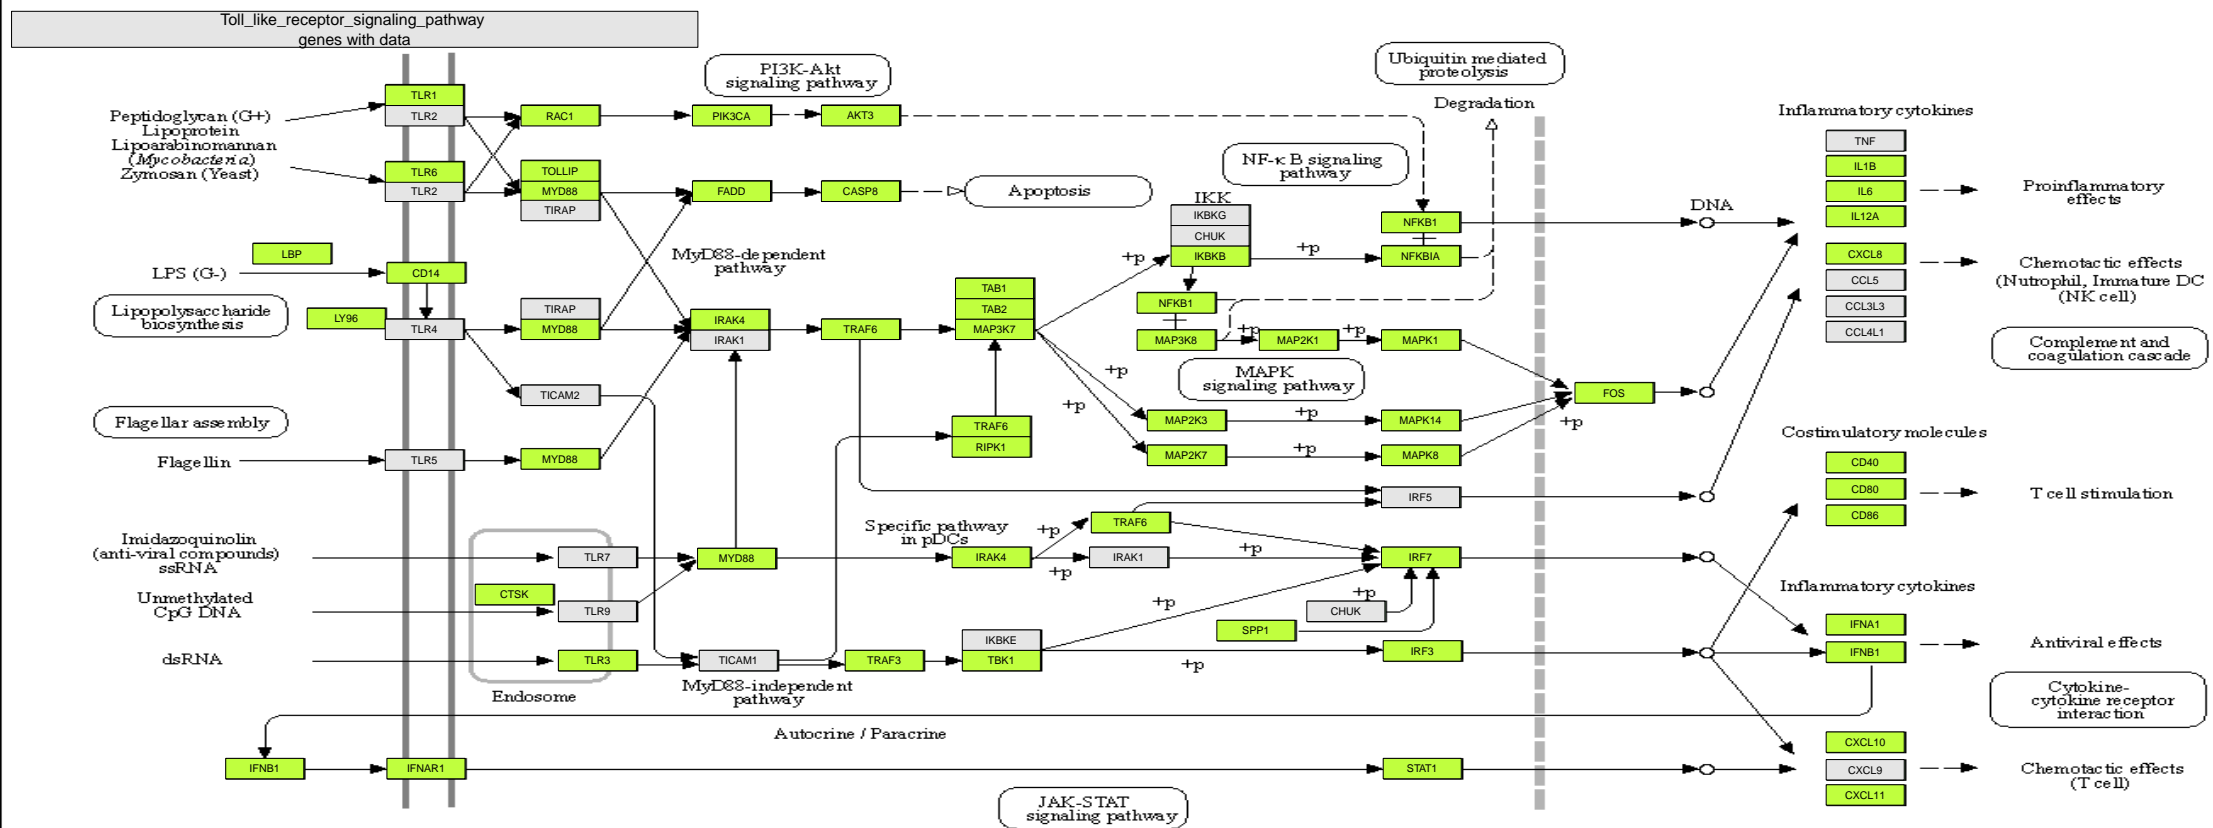

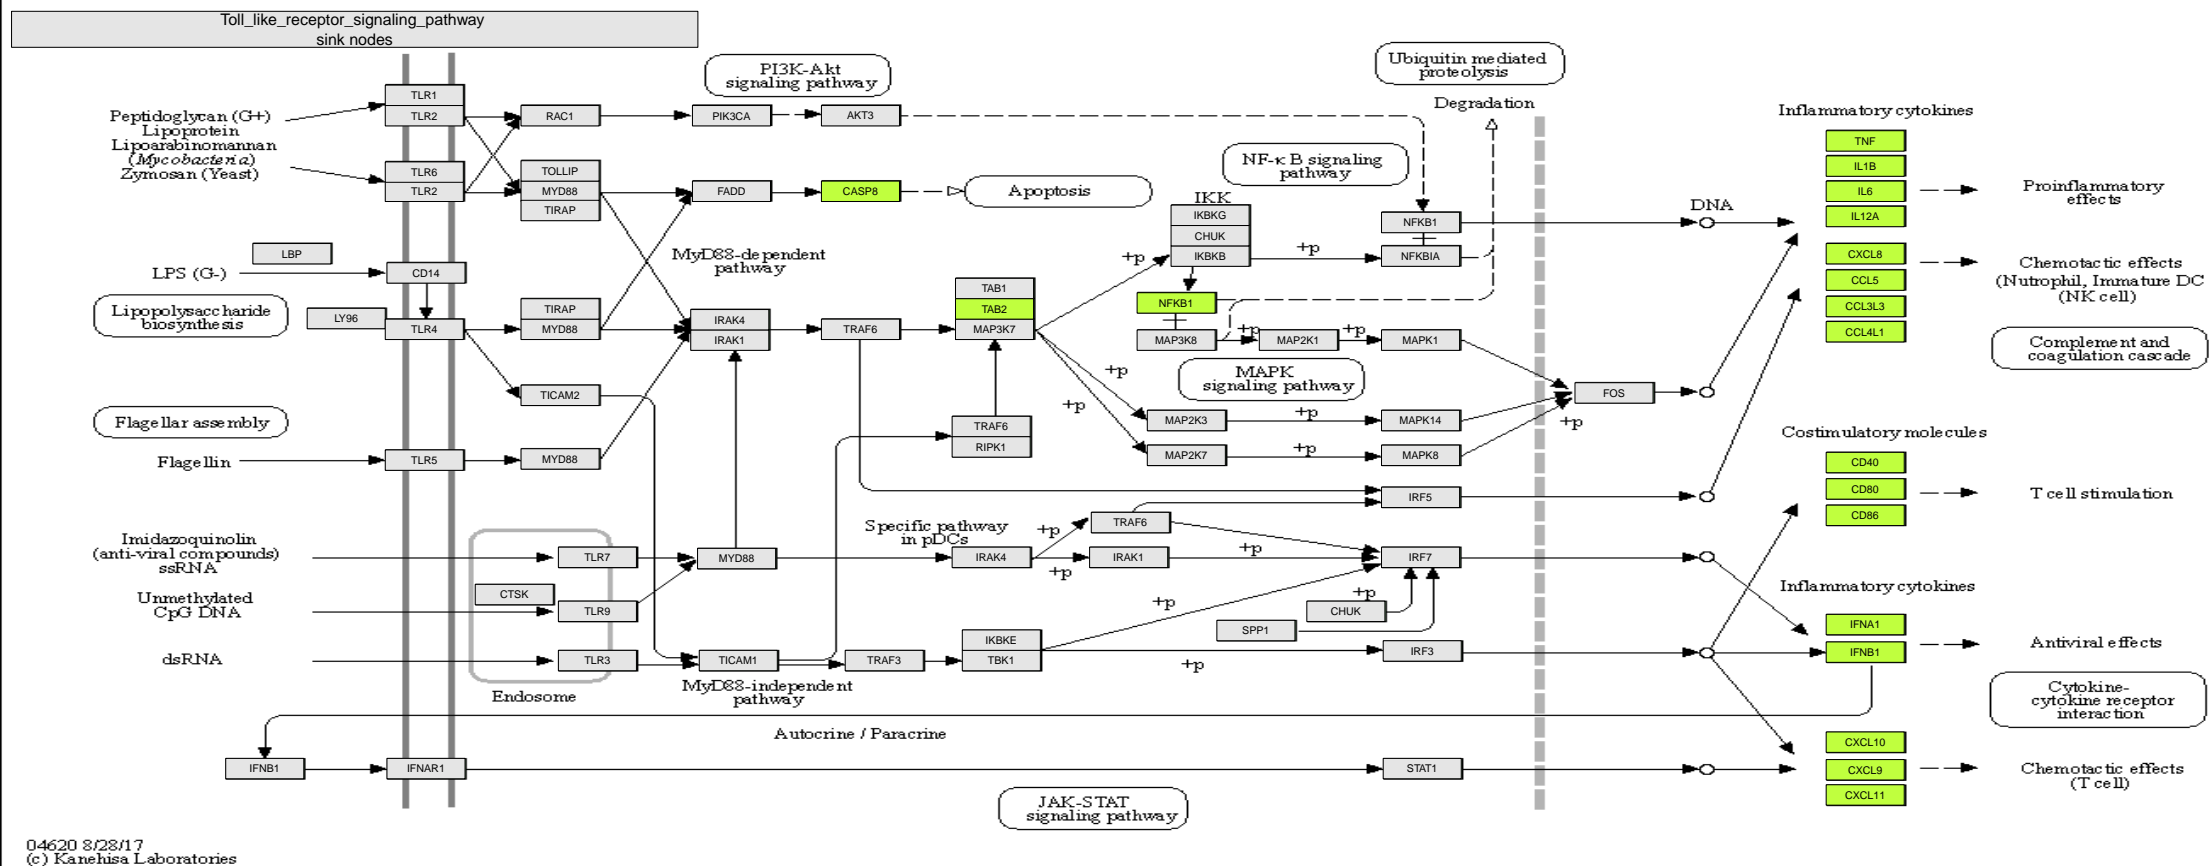

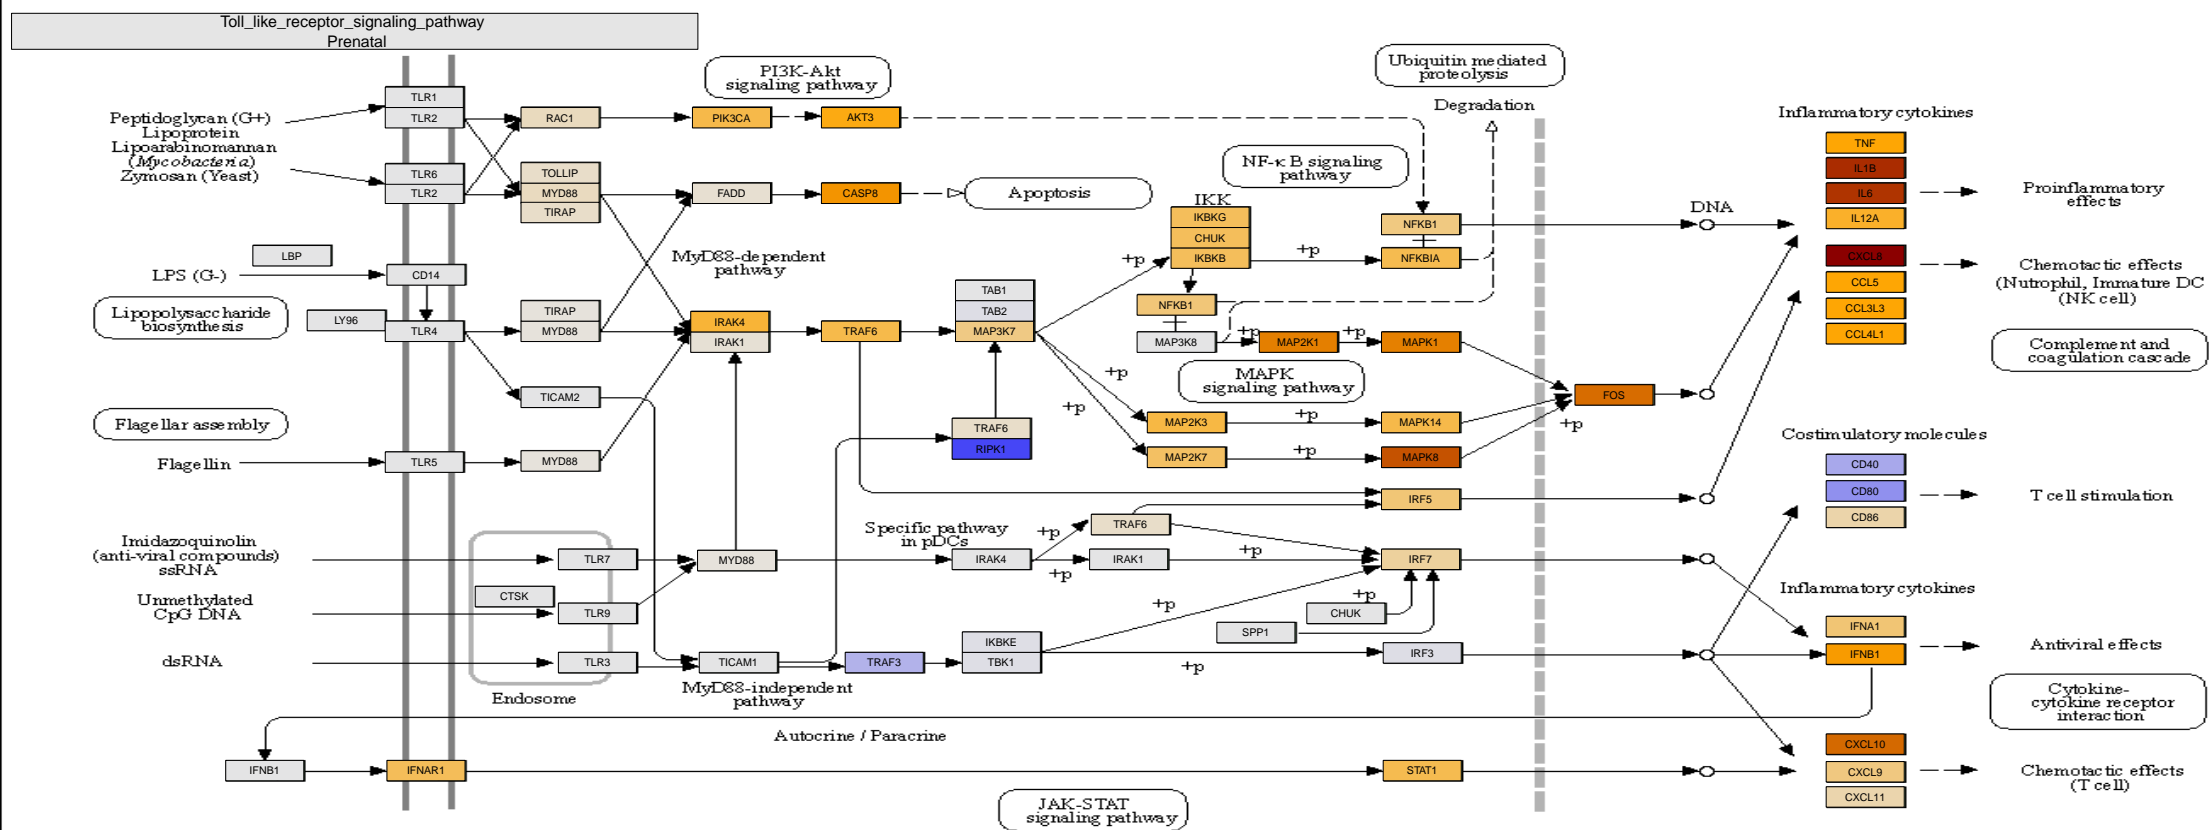

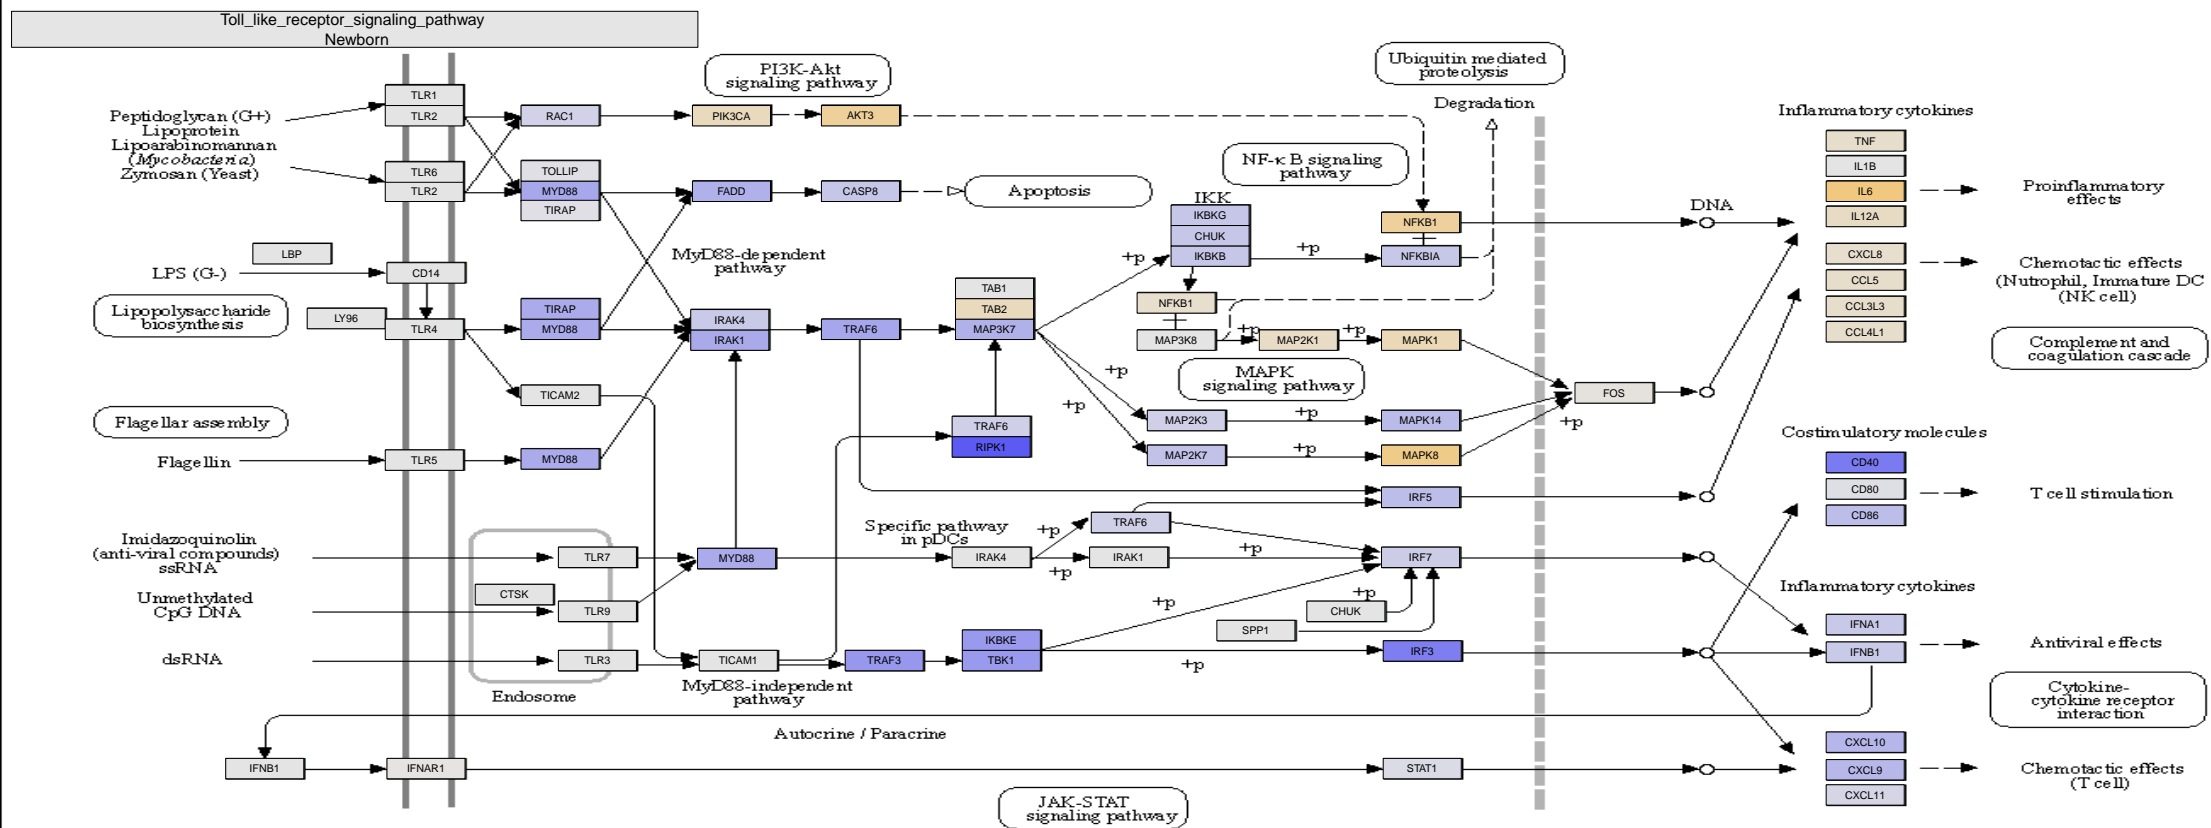

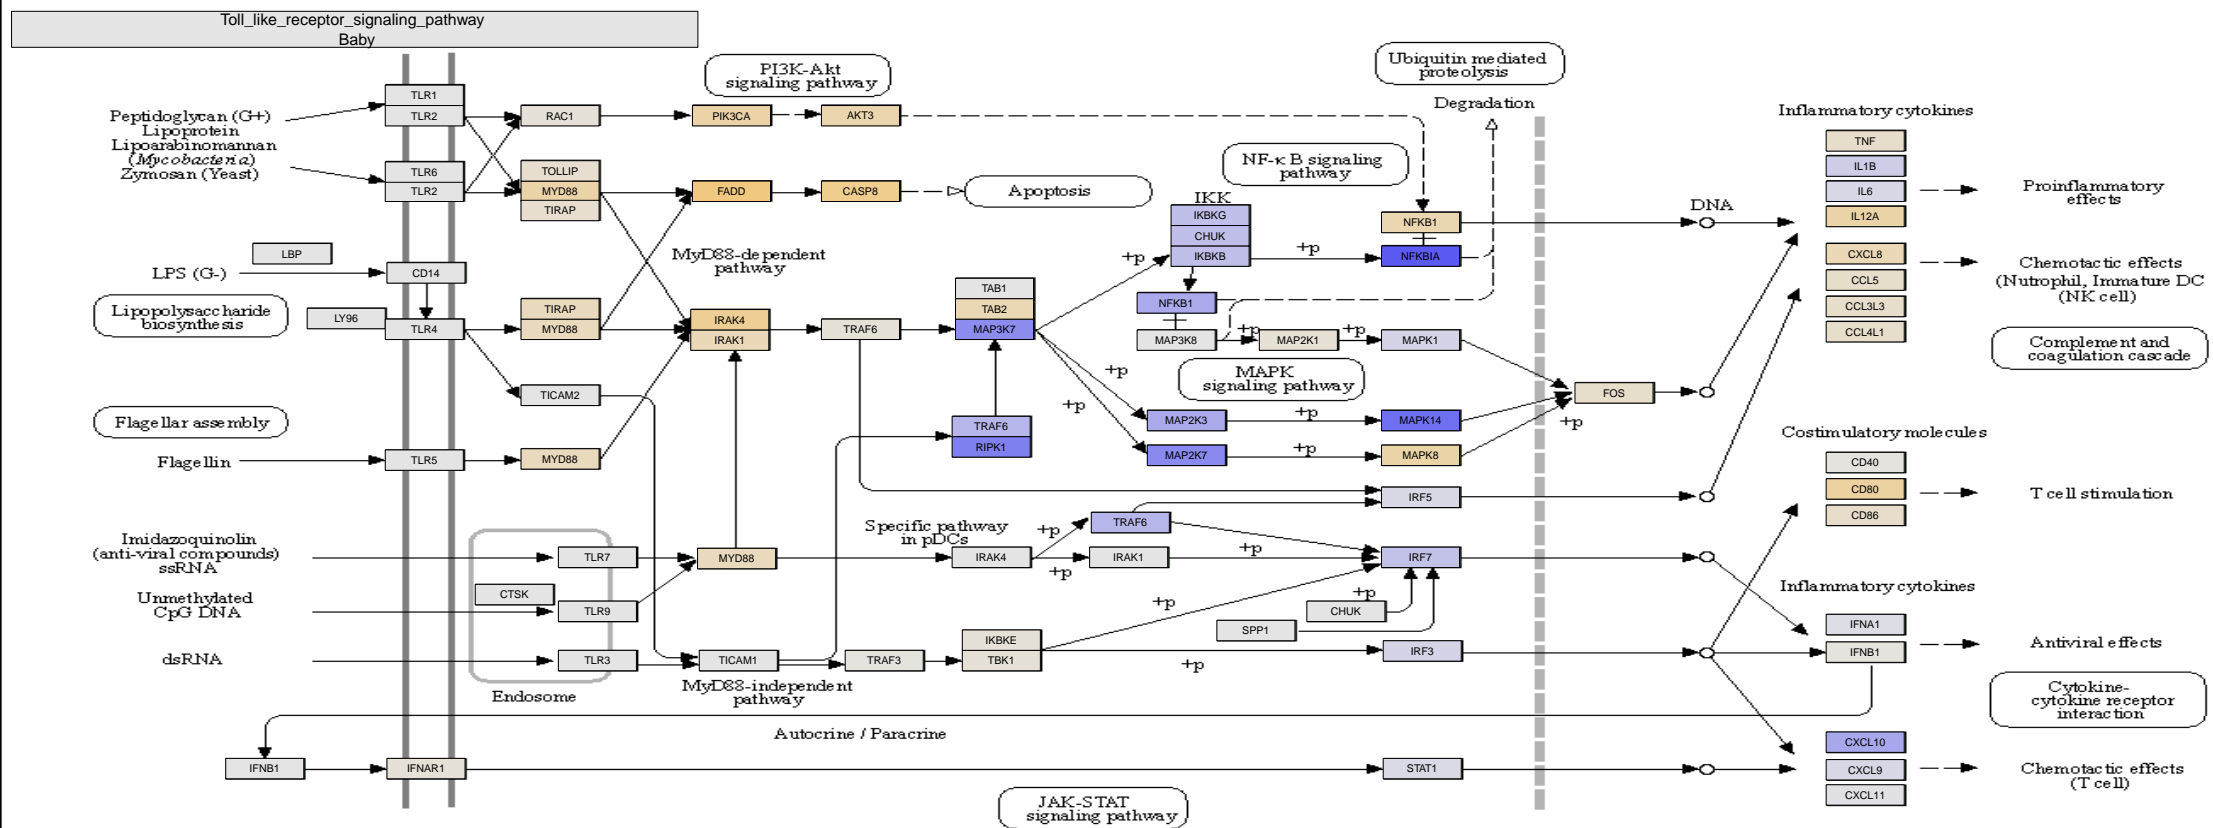

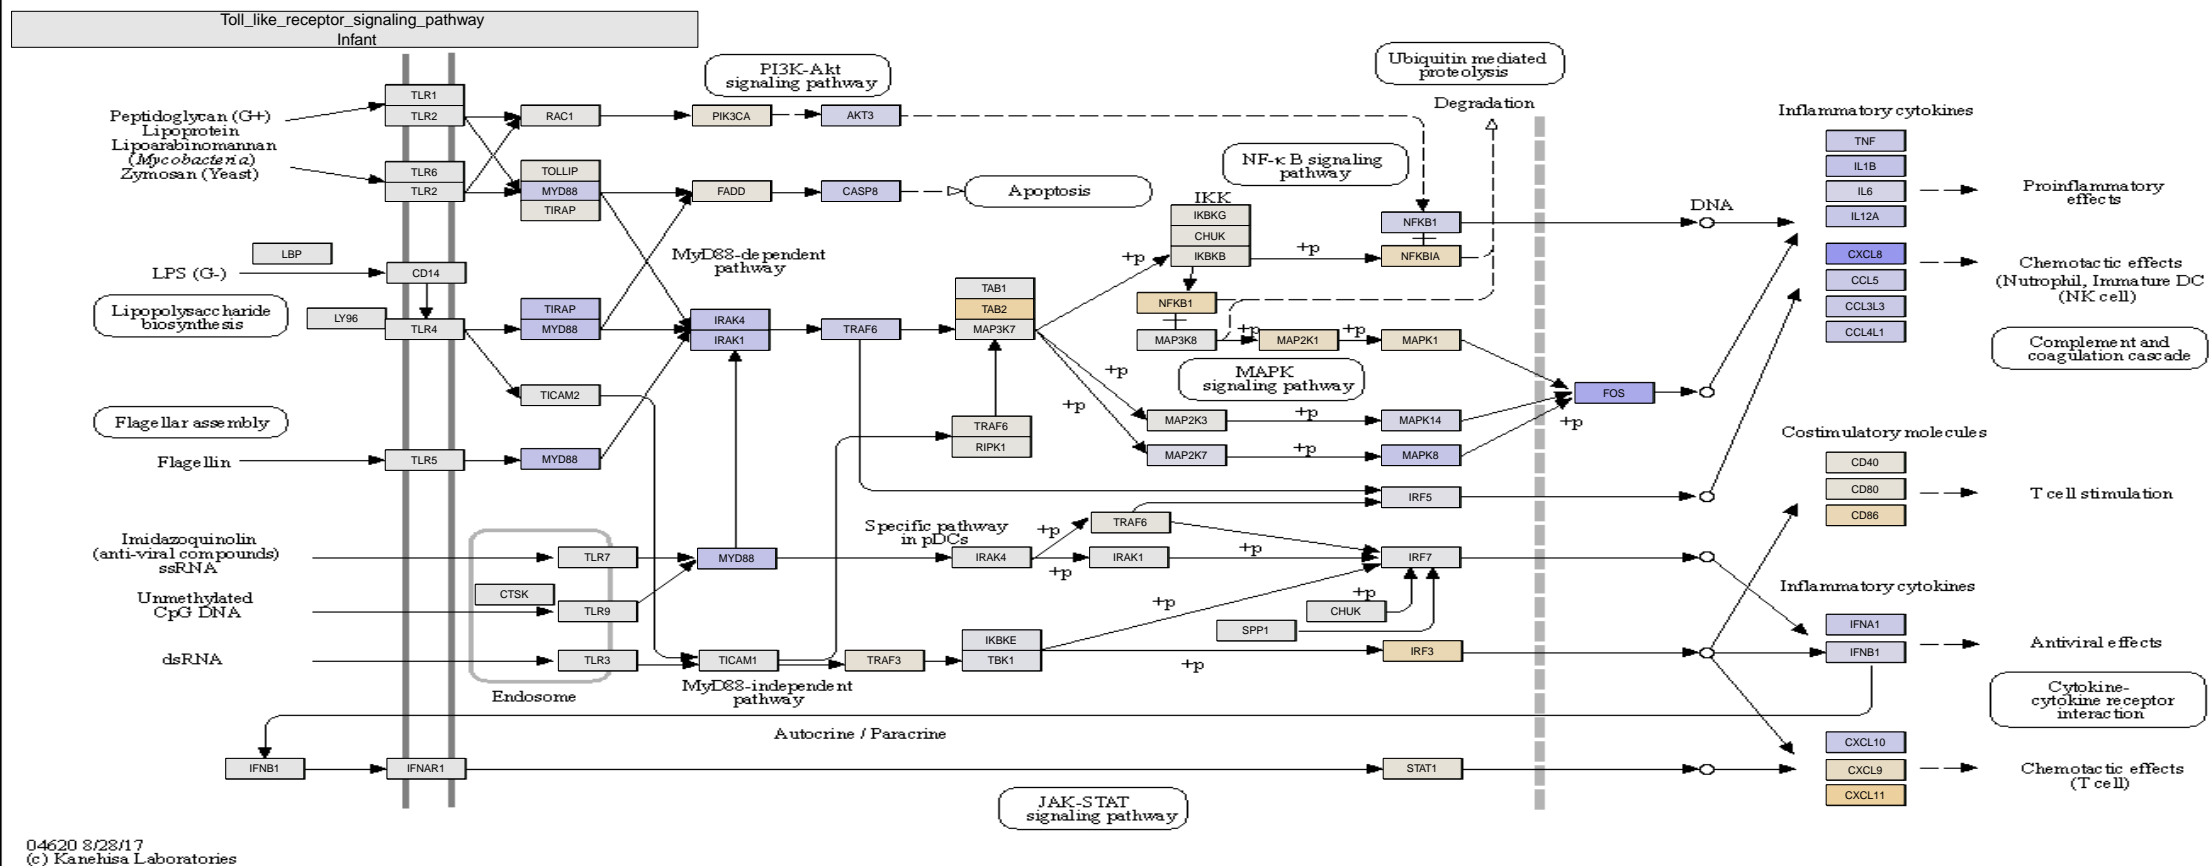

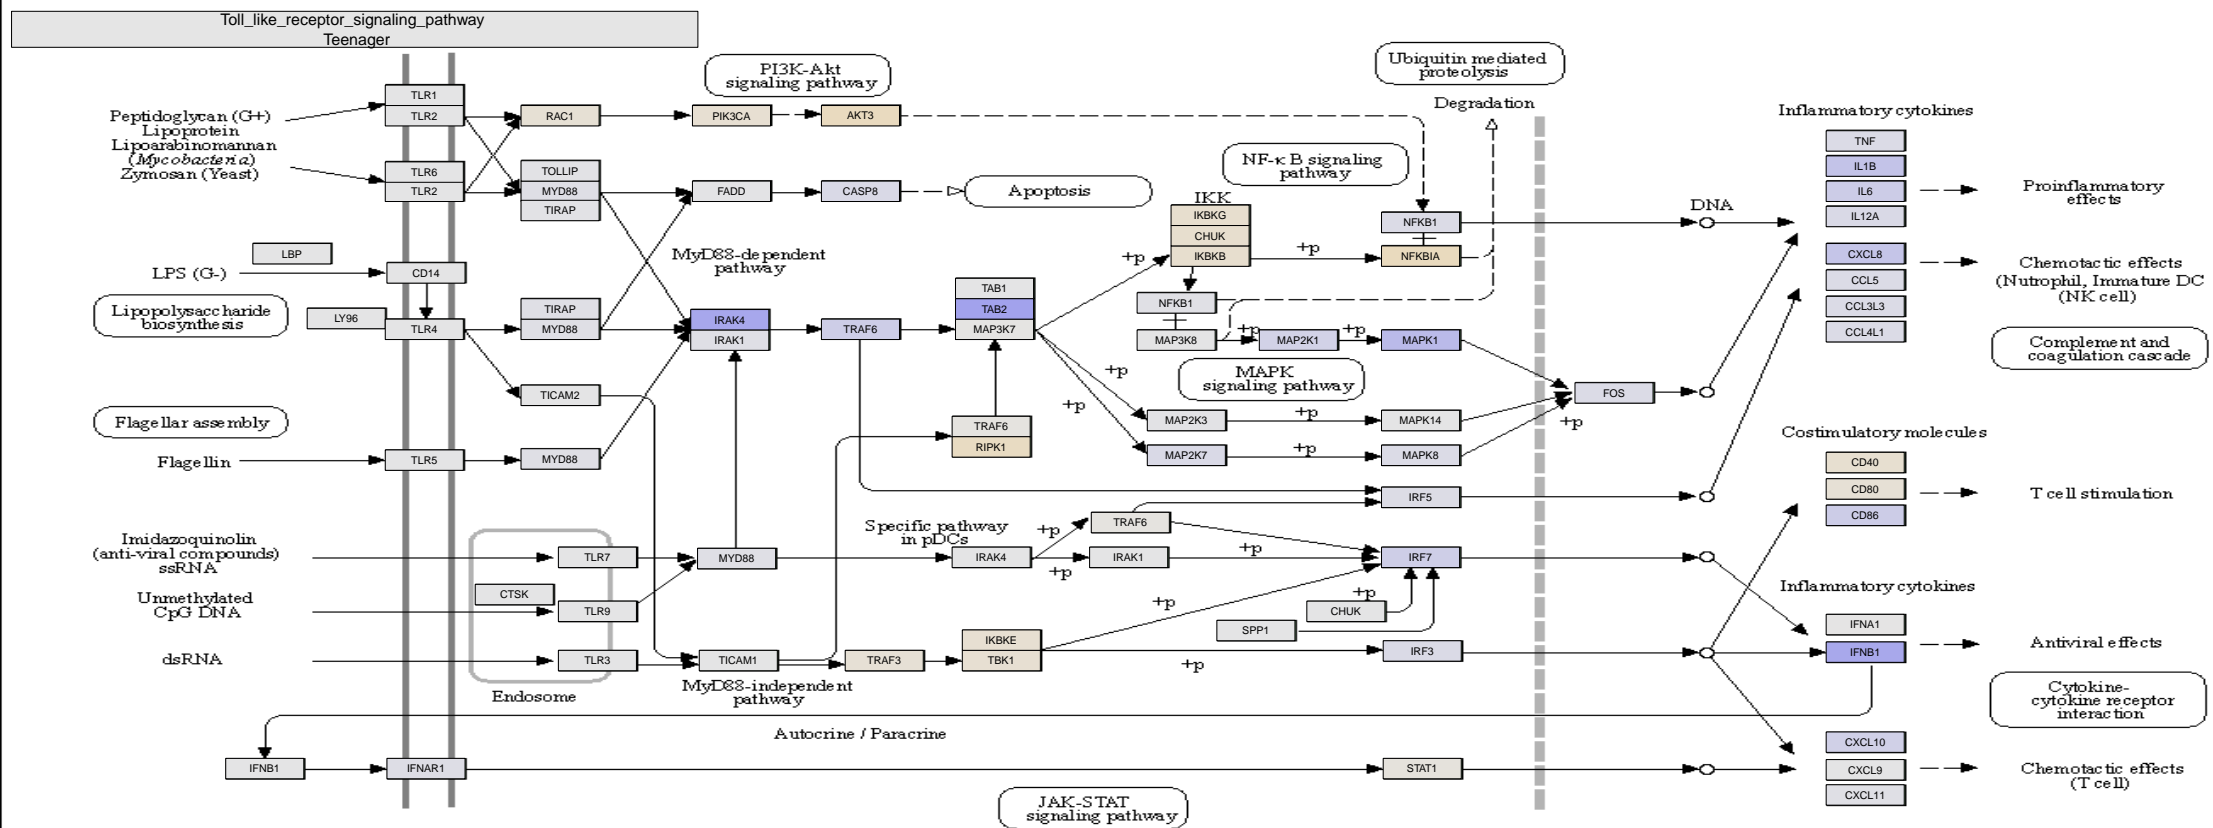





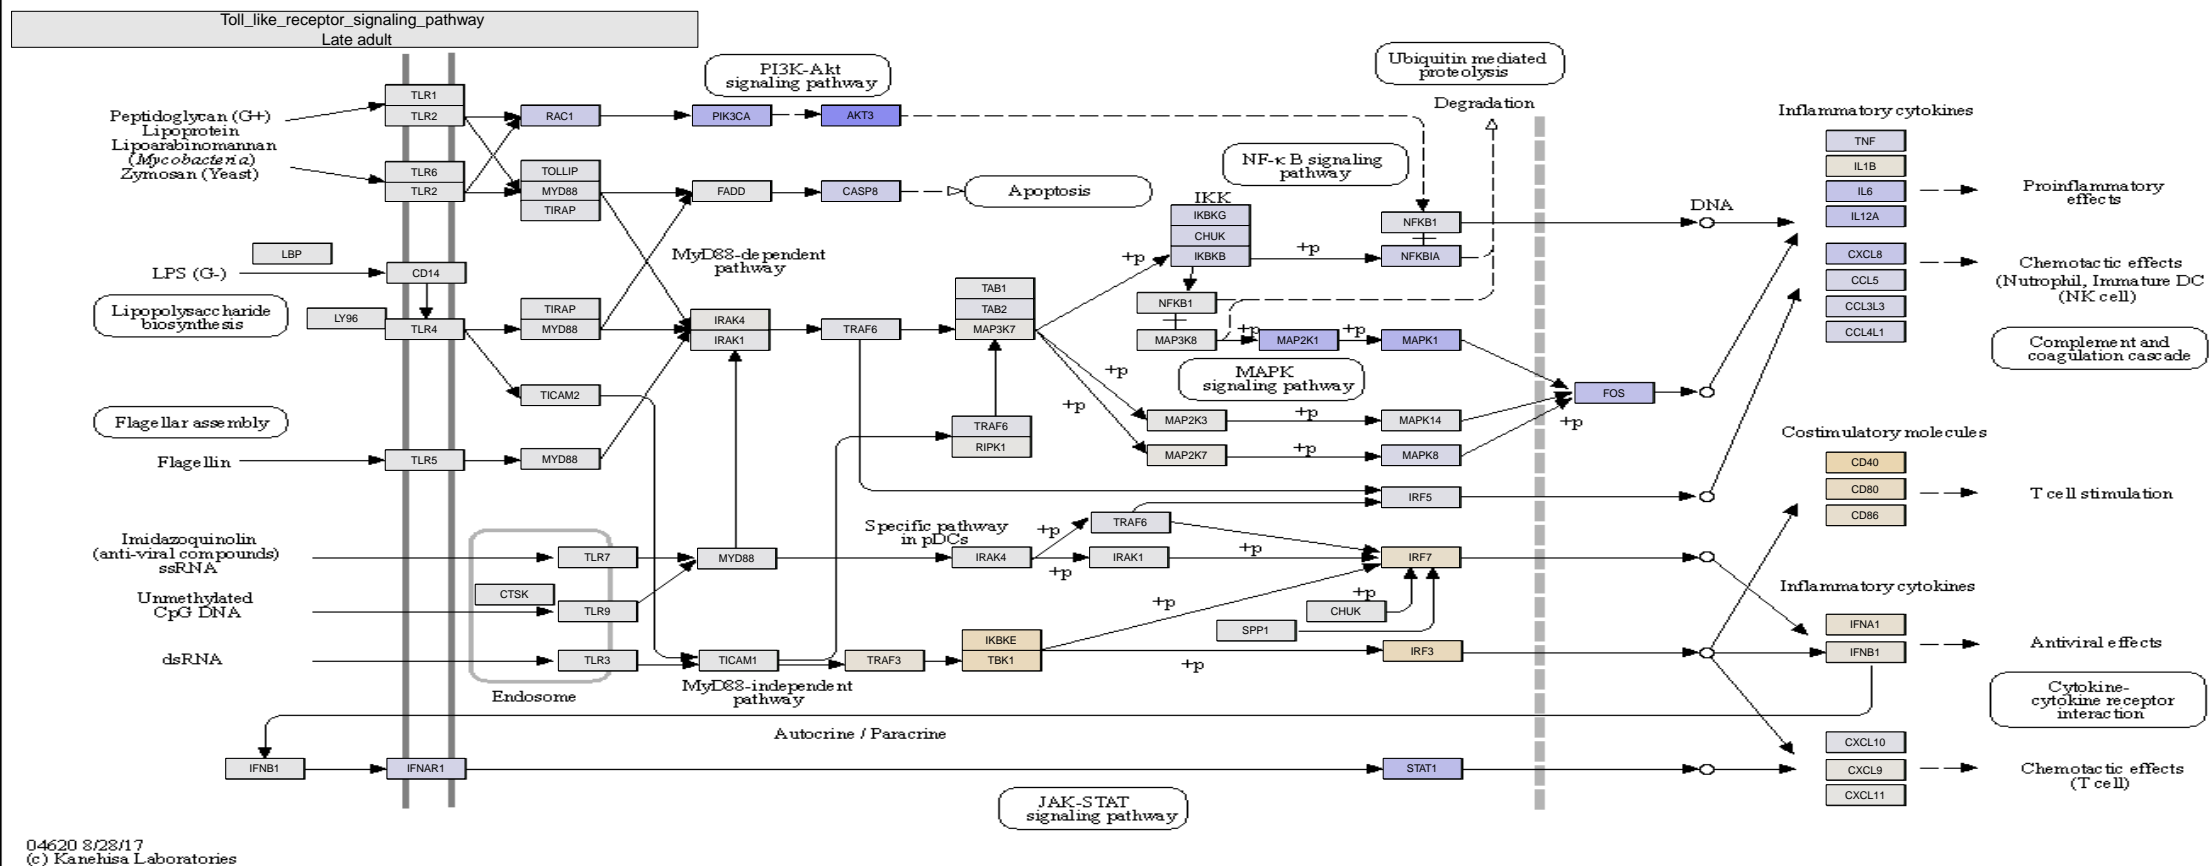

Supplement: s1 [file s1]

# Wnt signaling pathway

**all genes**

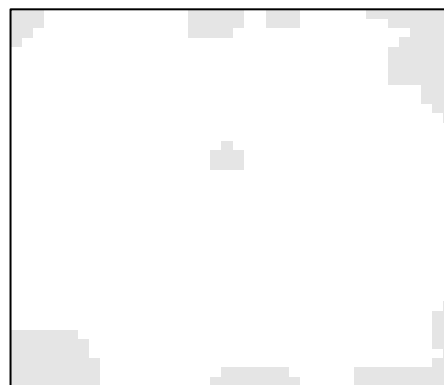

maximum =  $-\ln f$

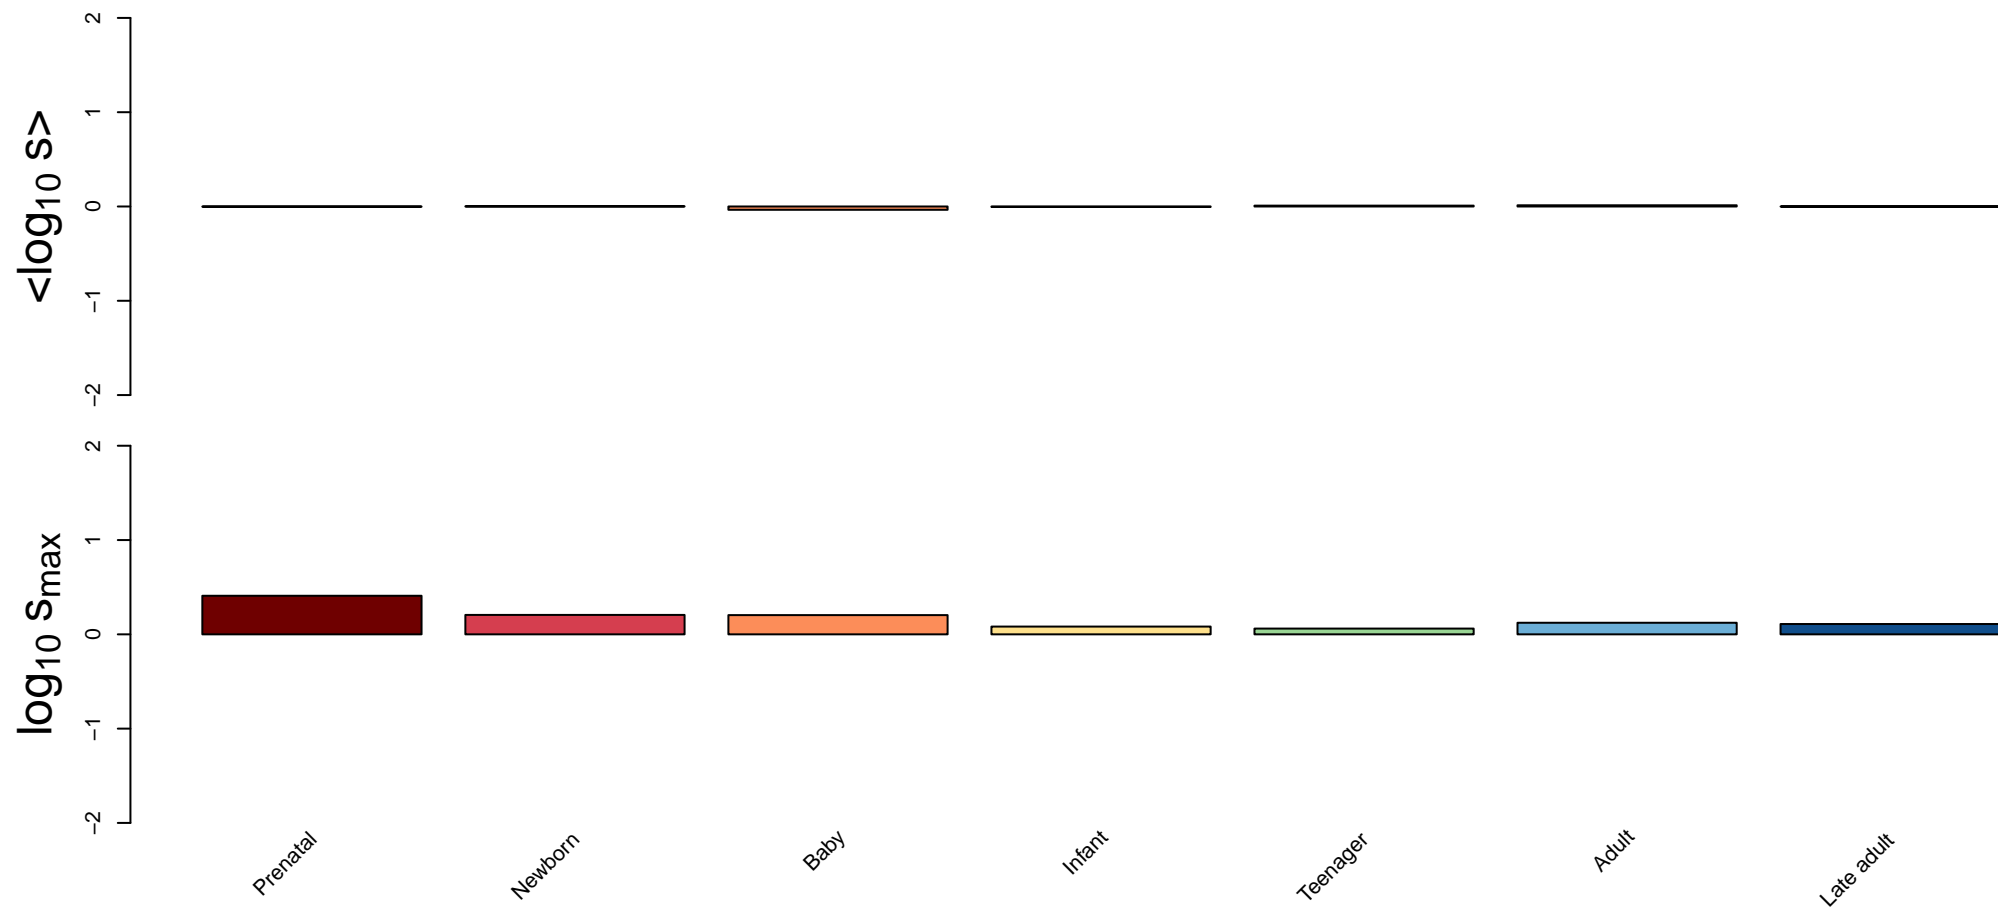

Wnt\_signaling\_pathway  
genes with data

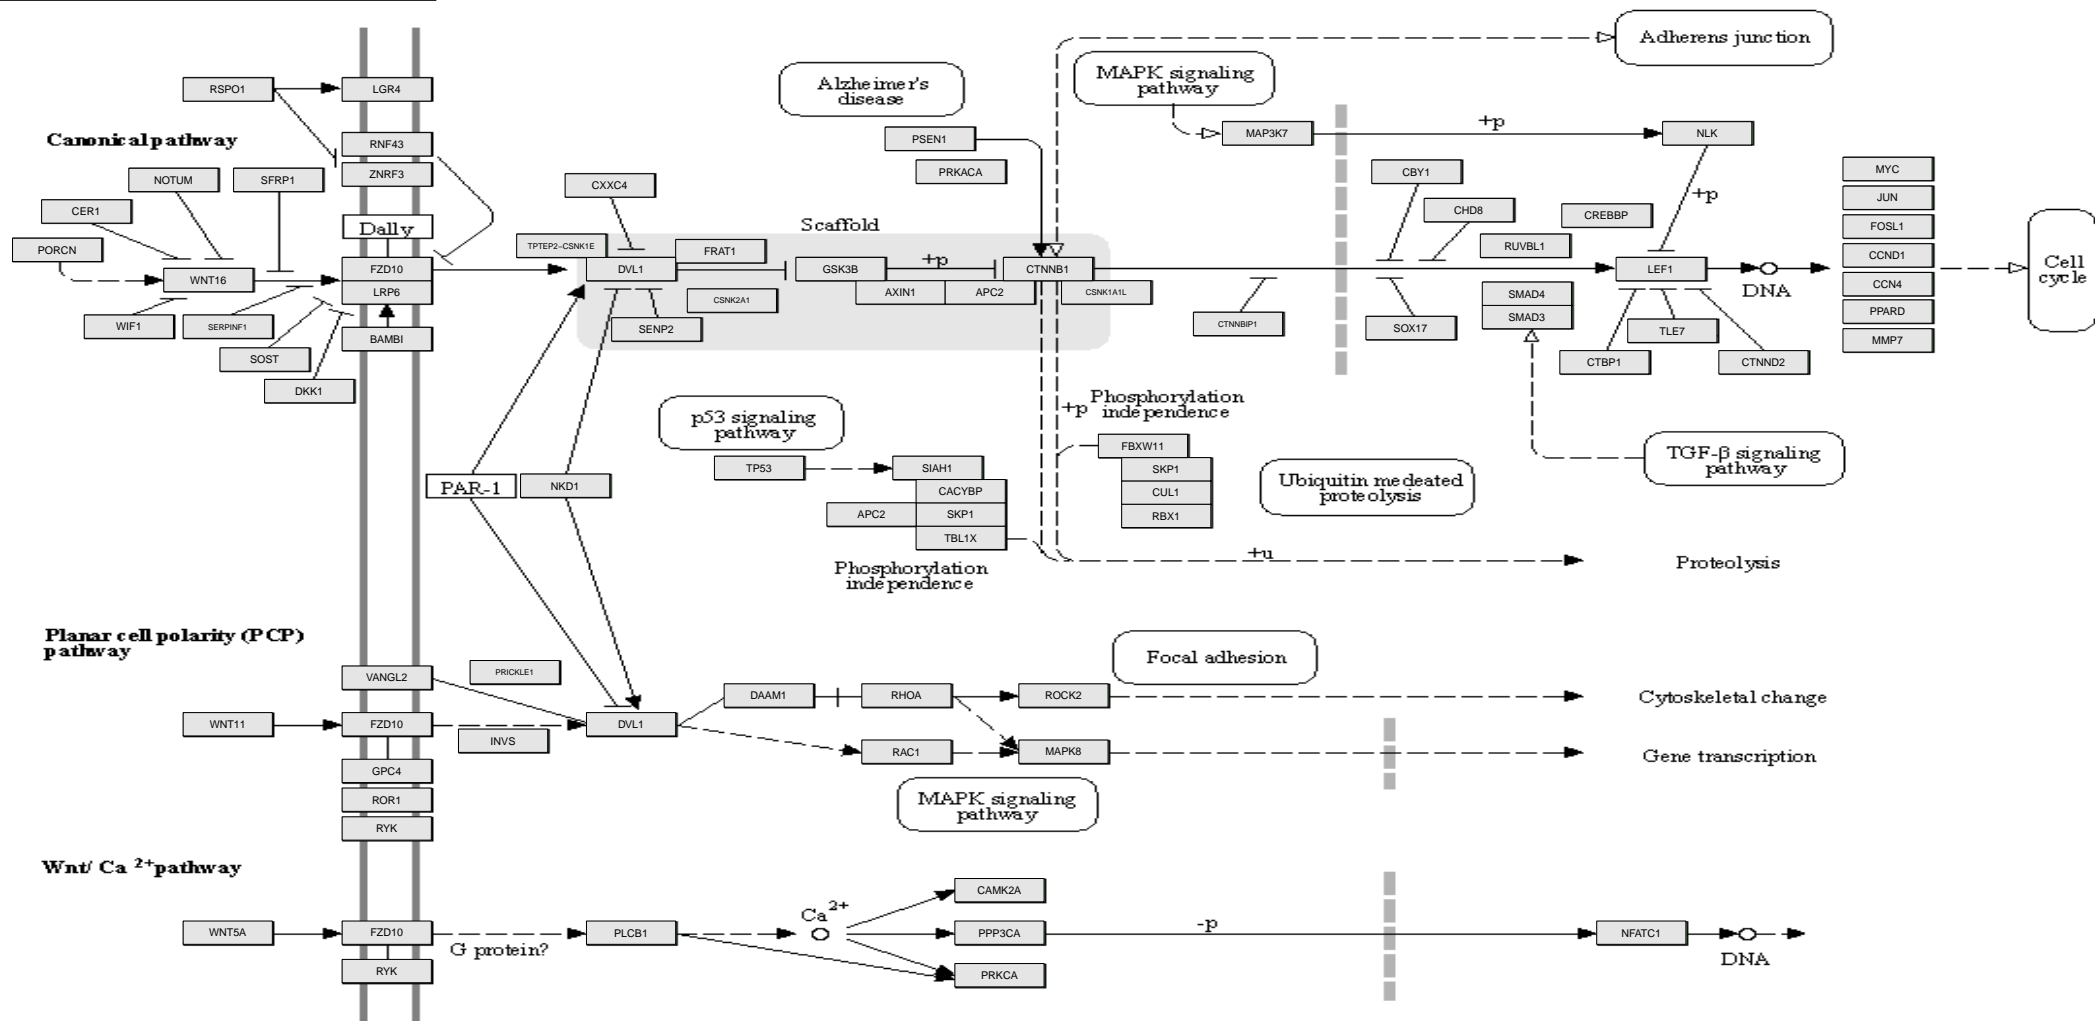

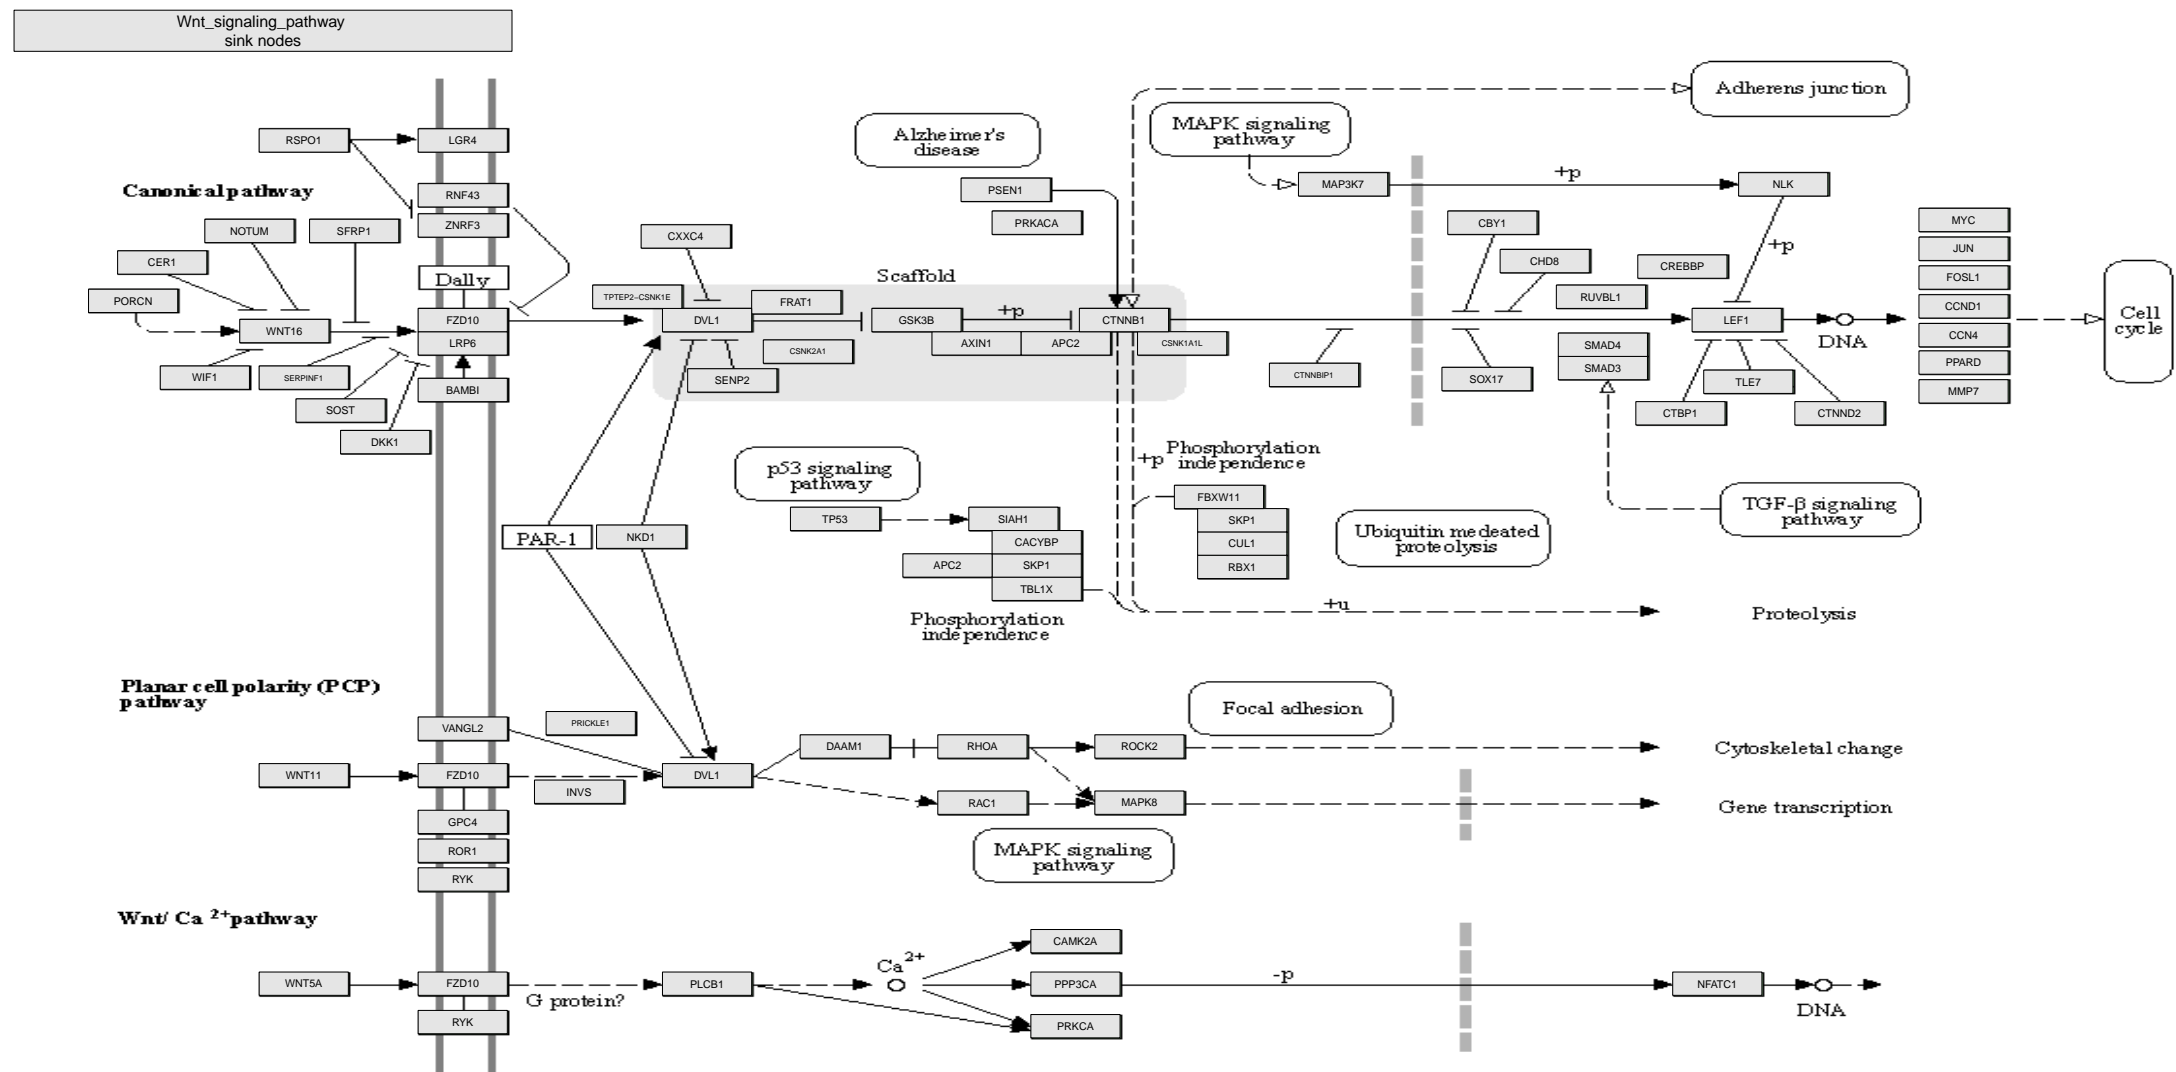





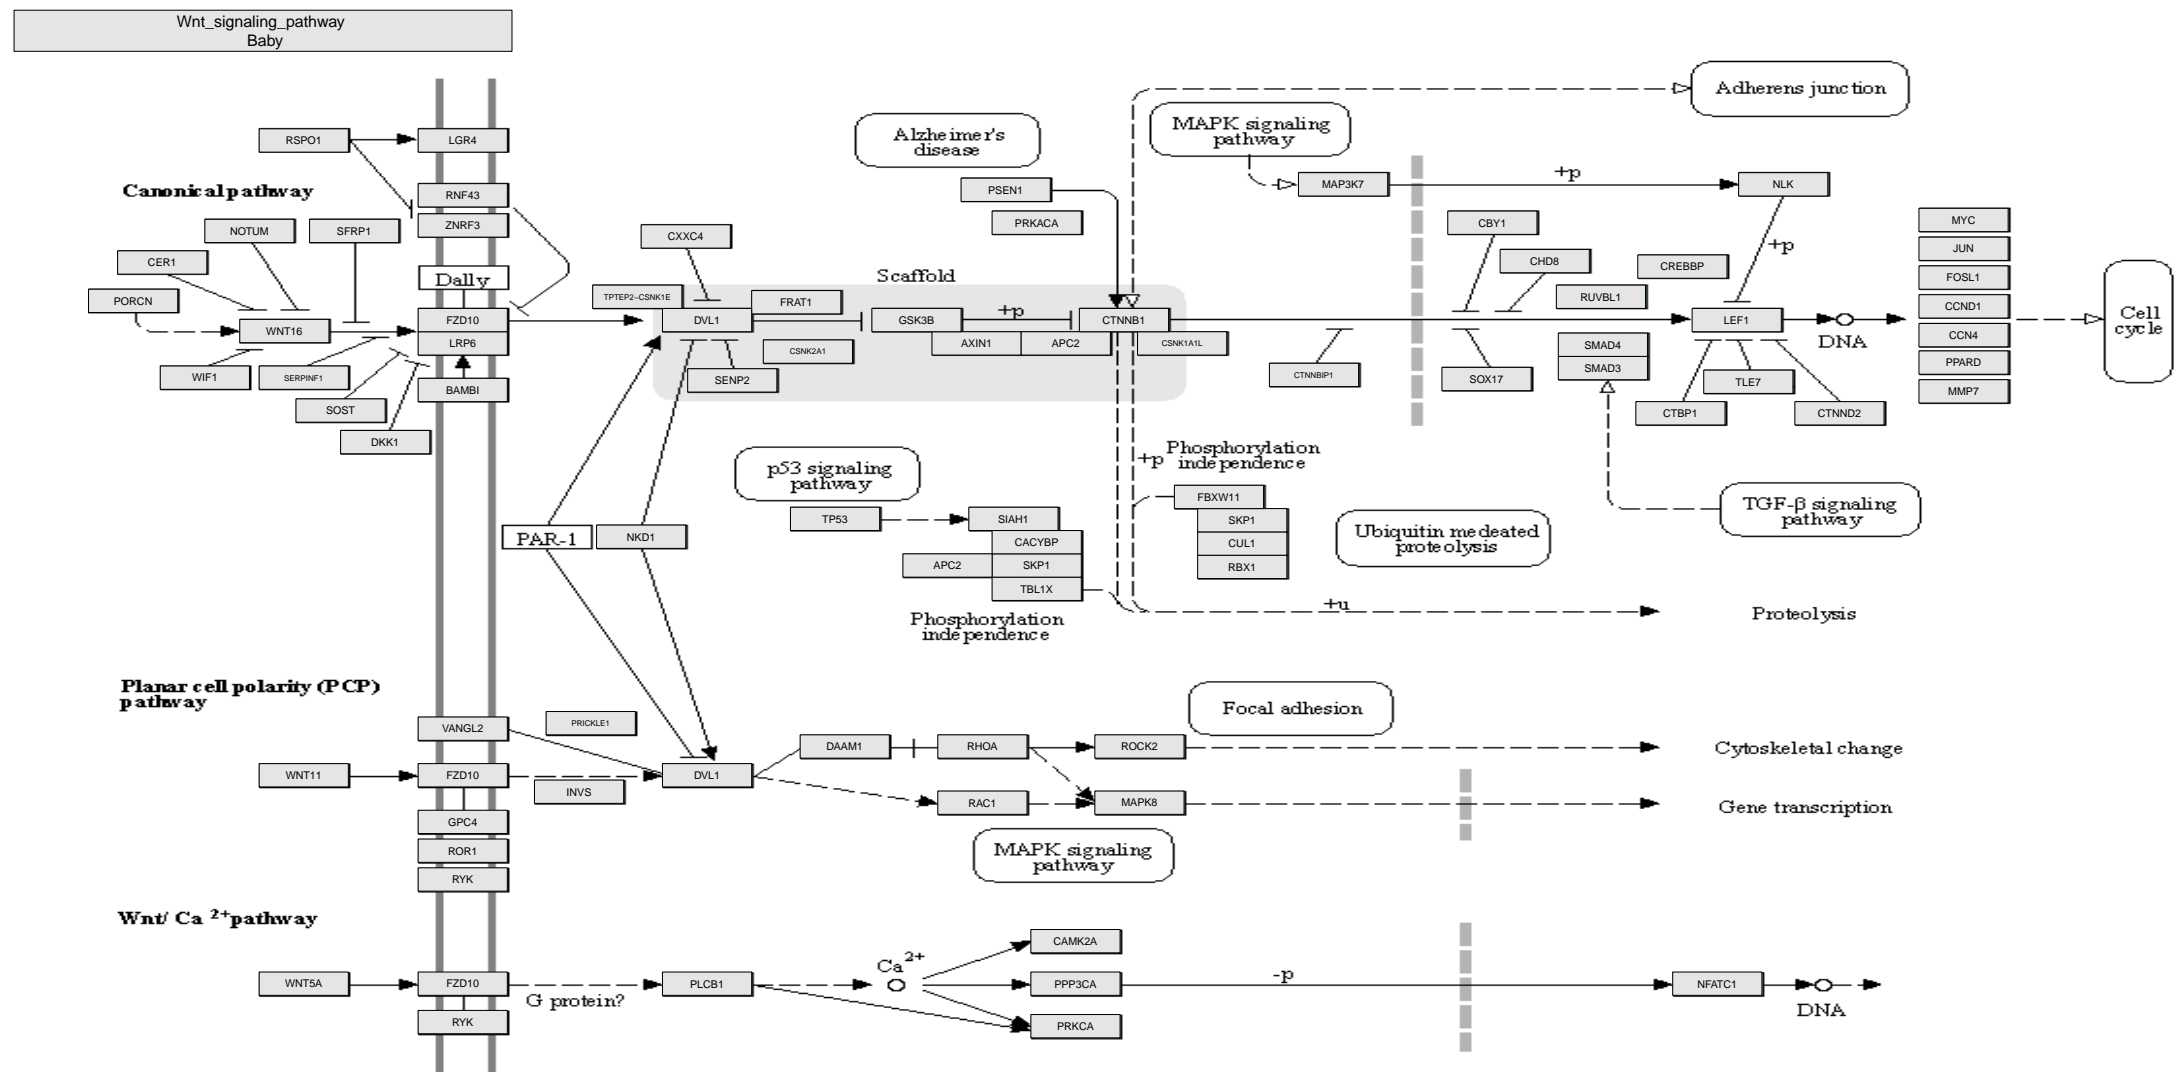

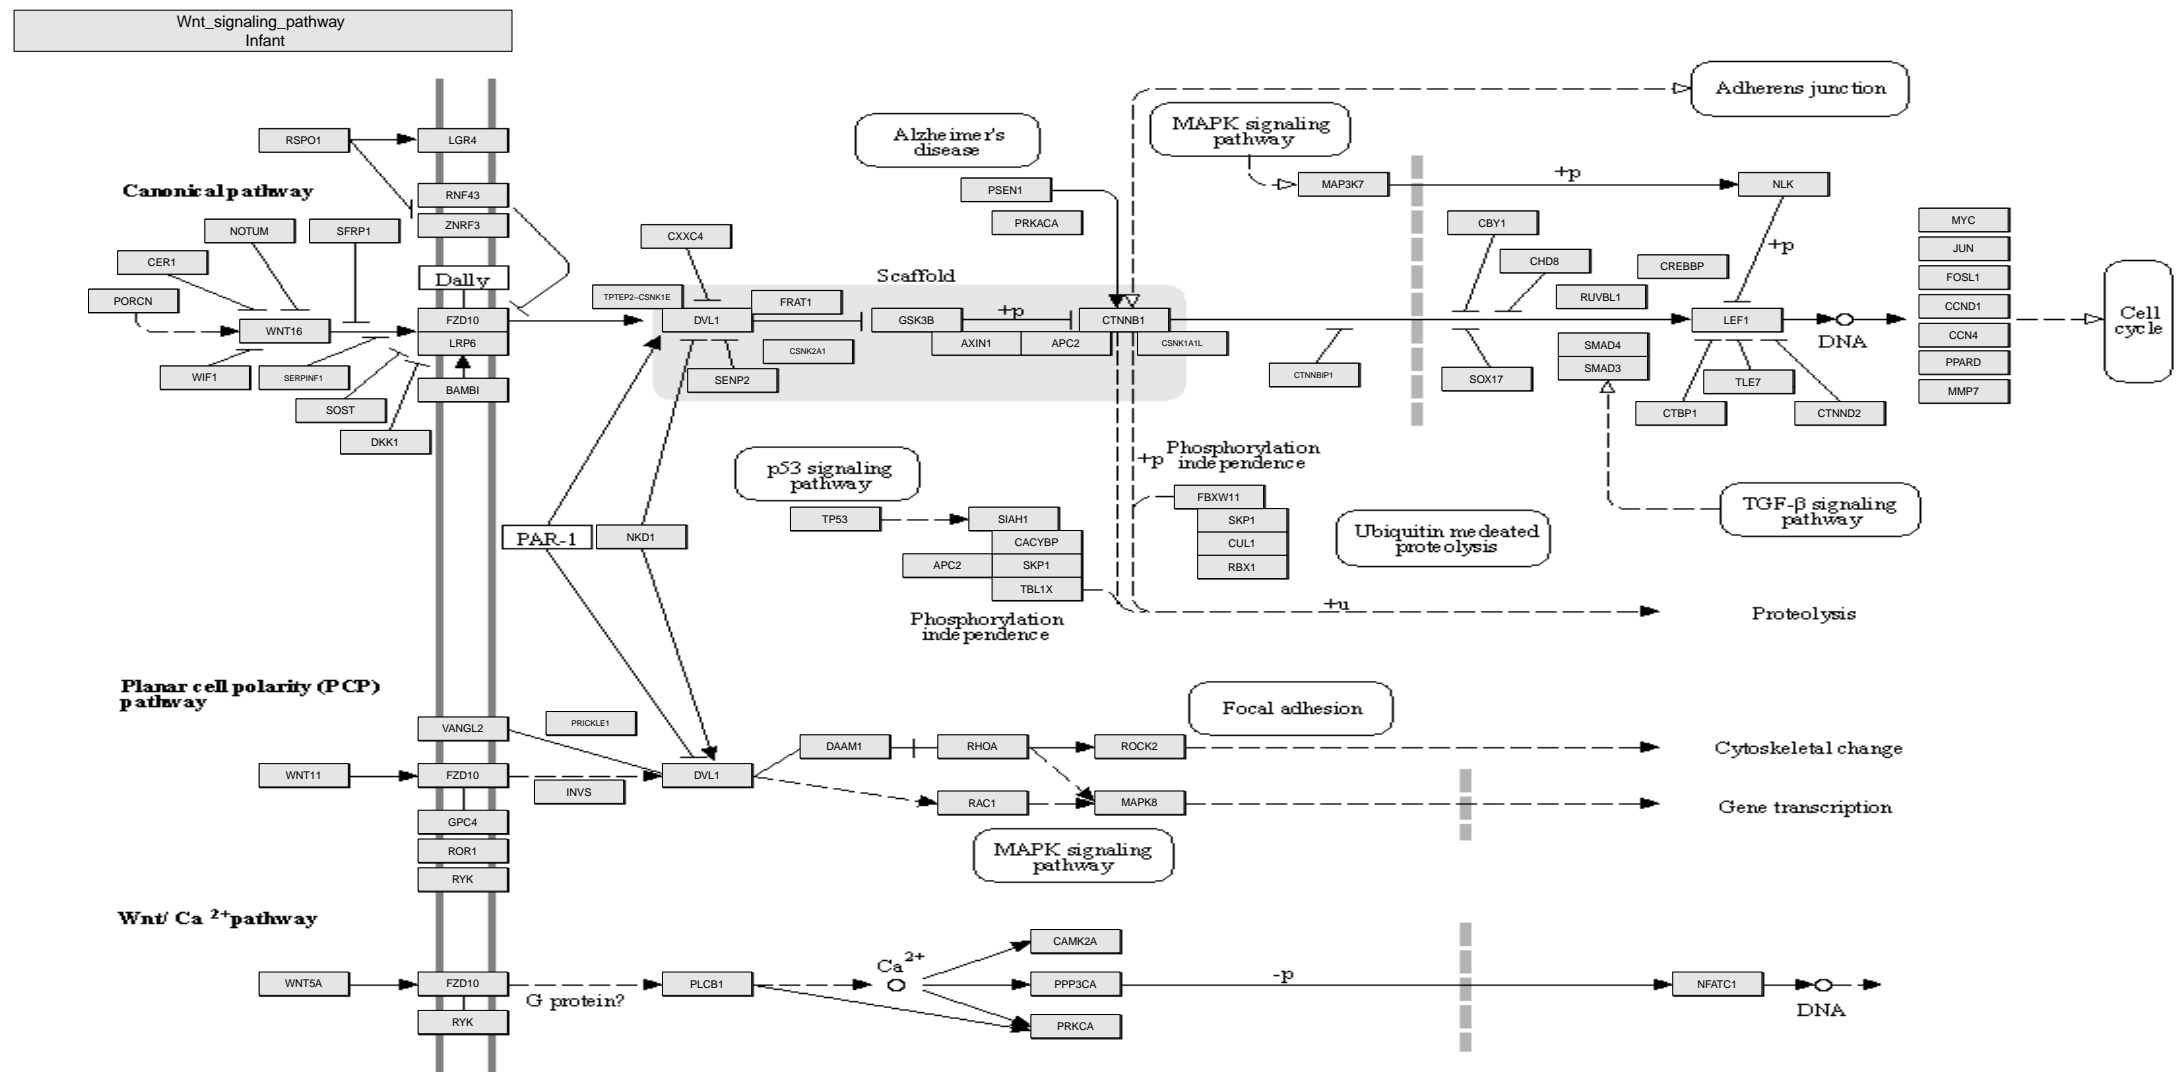

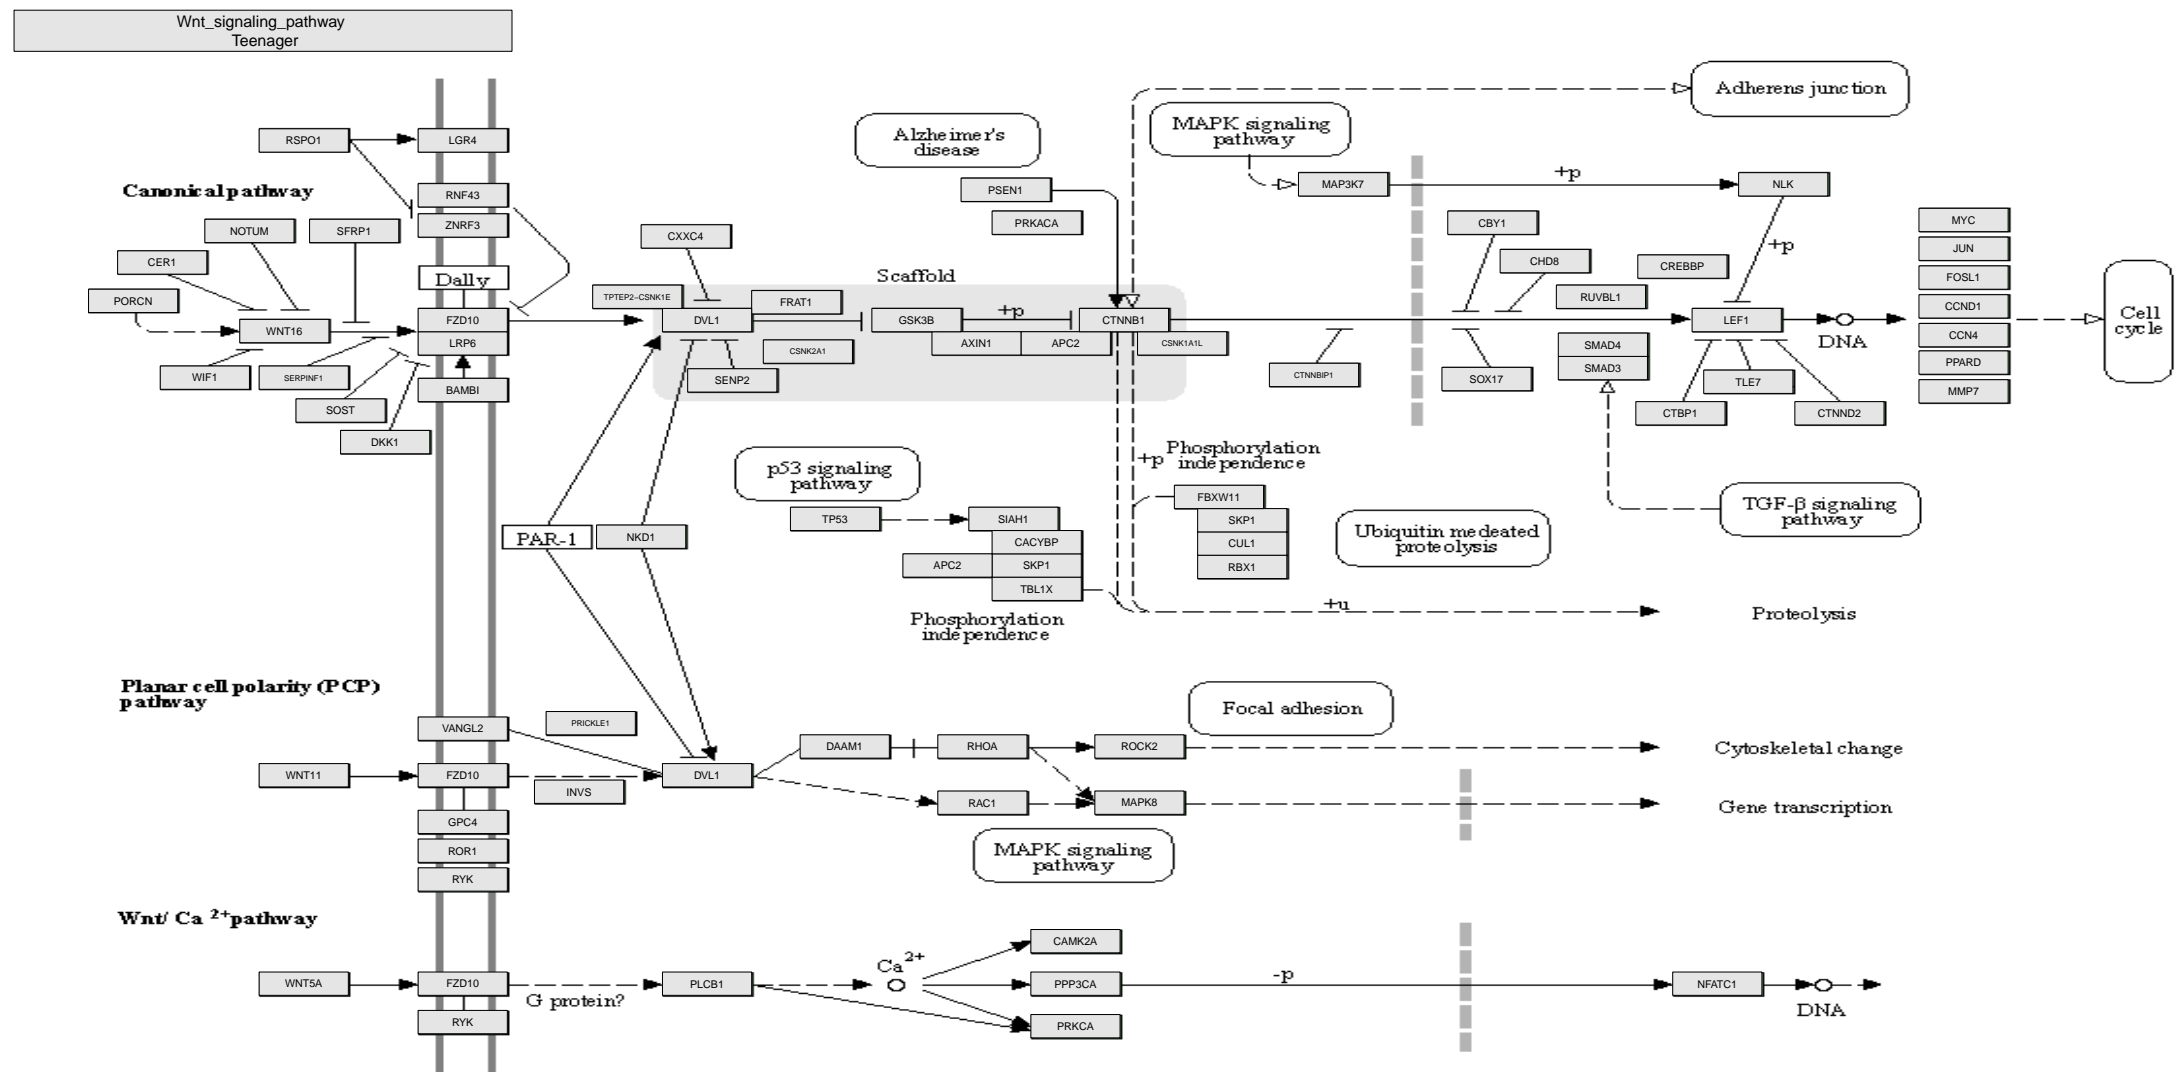



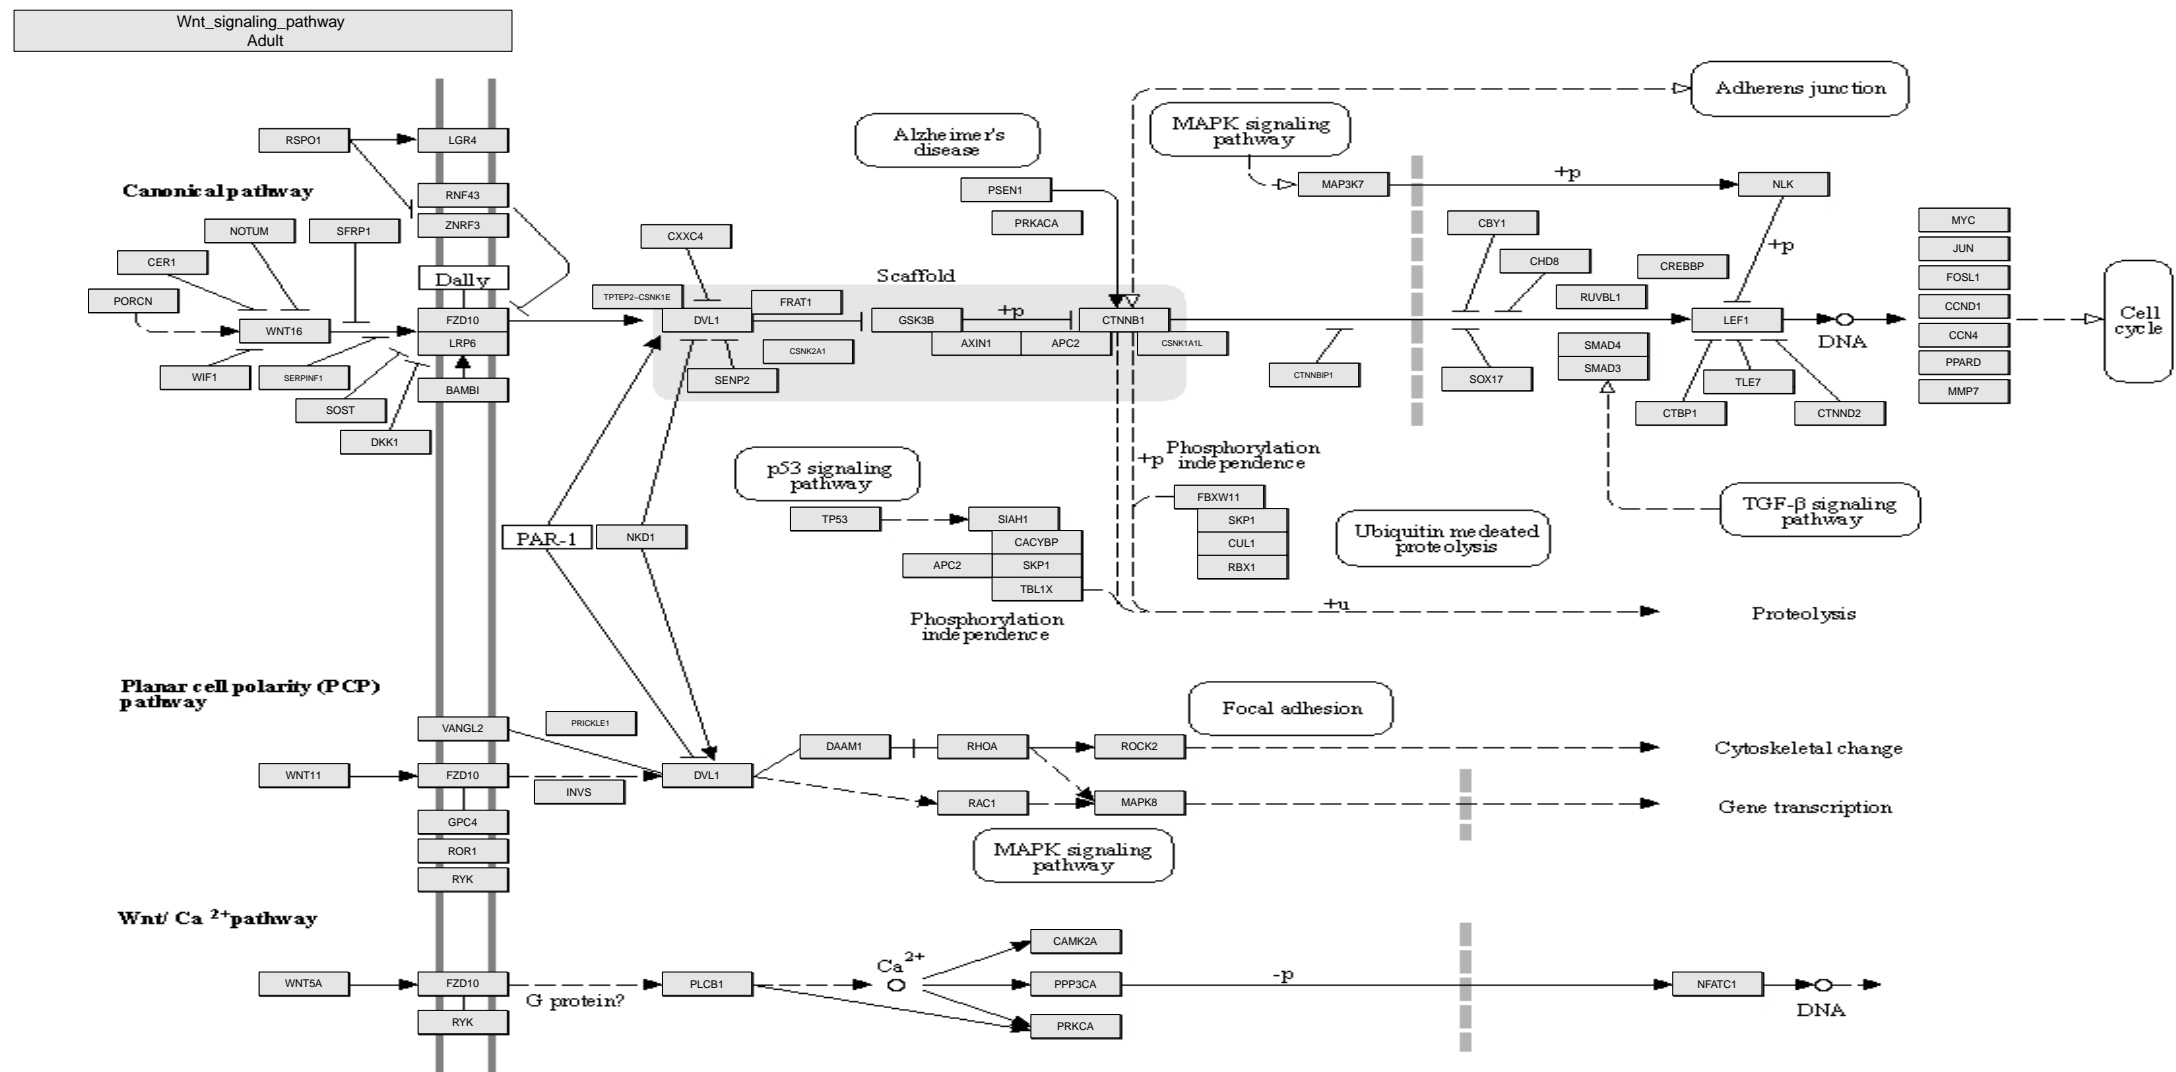

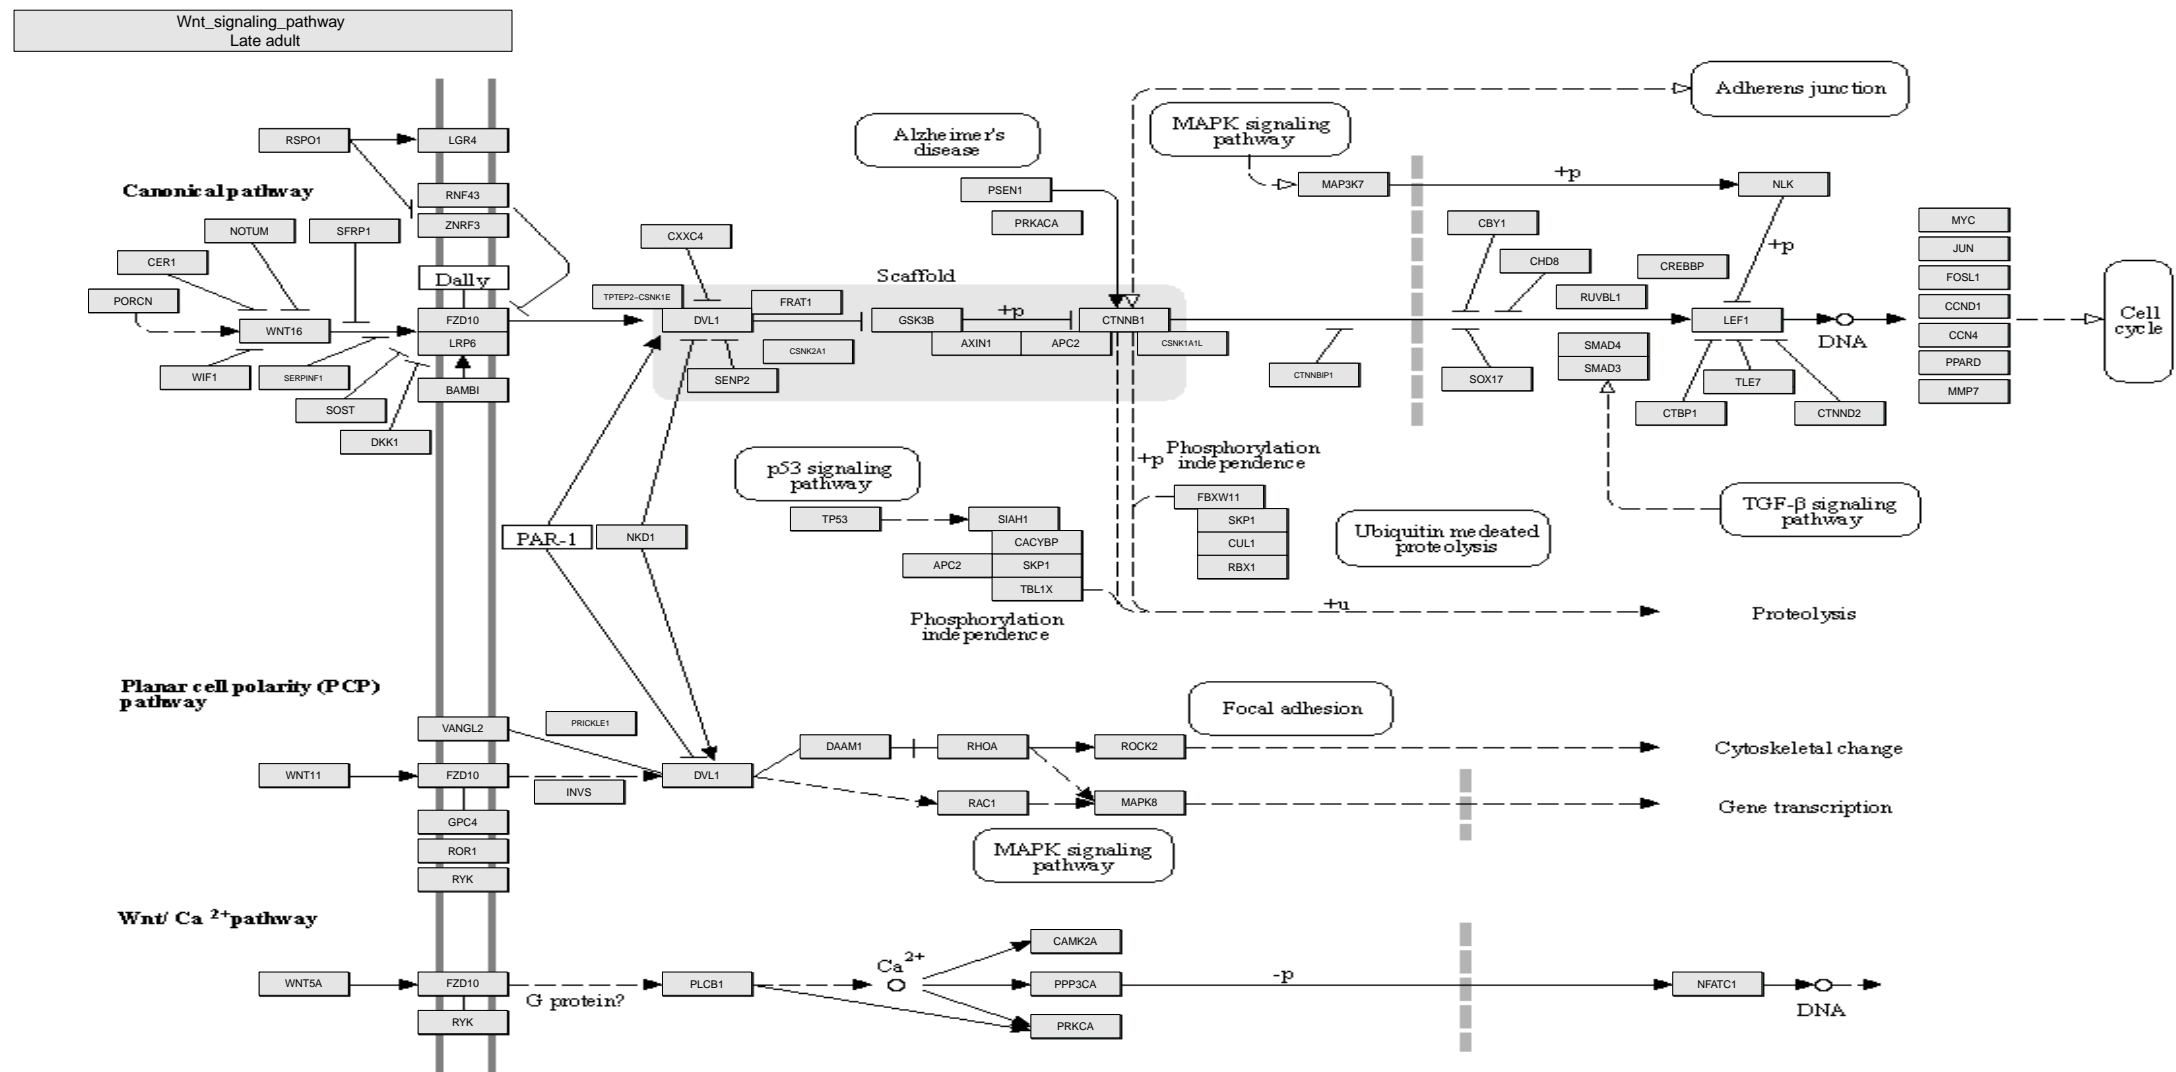

Supplement: s1 [file s1]

PPAR signaling pathway

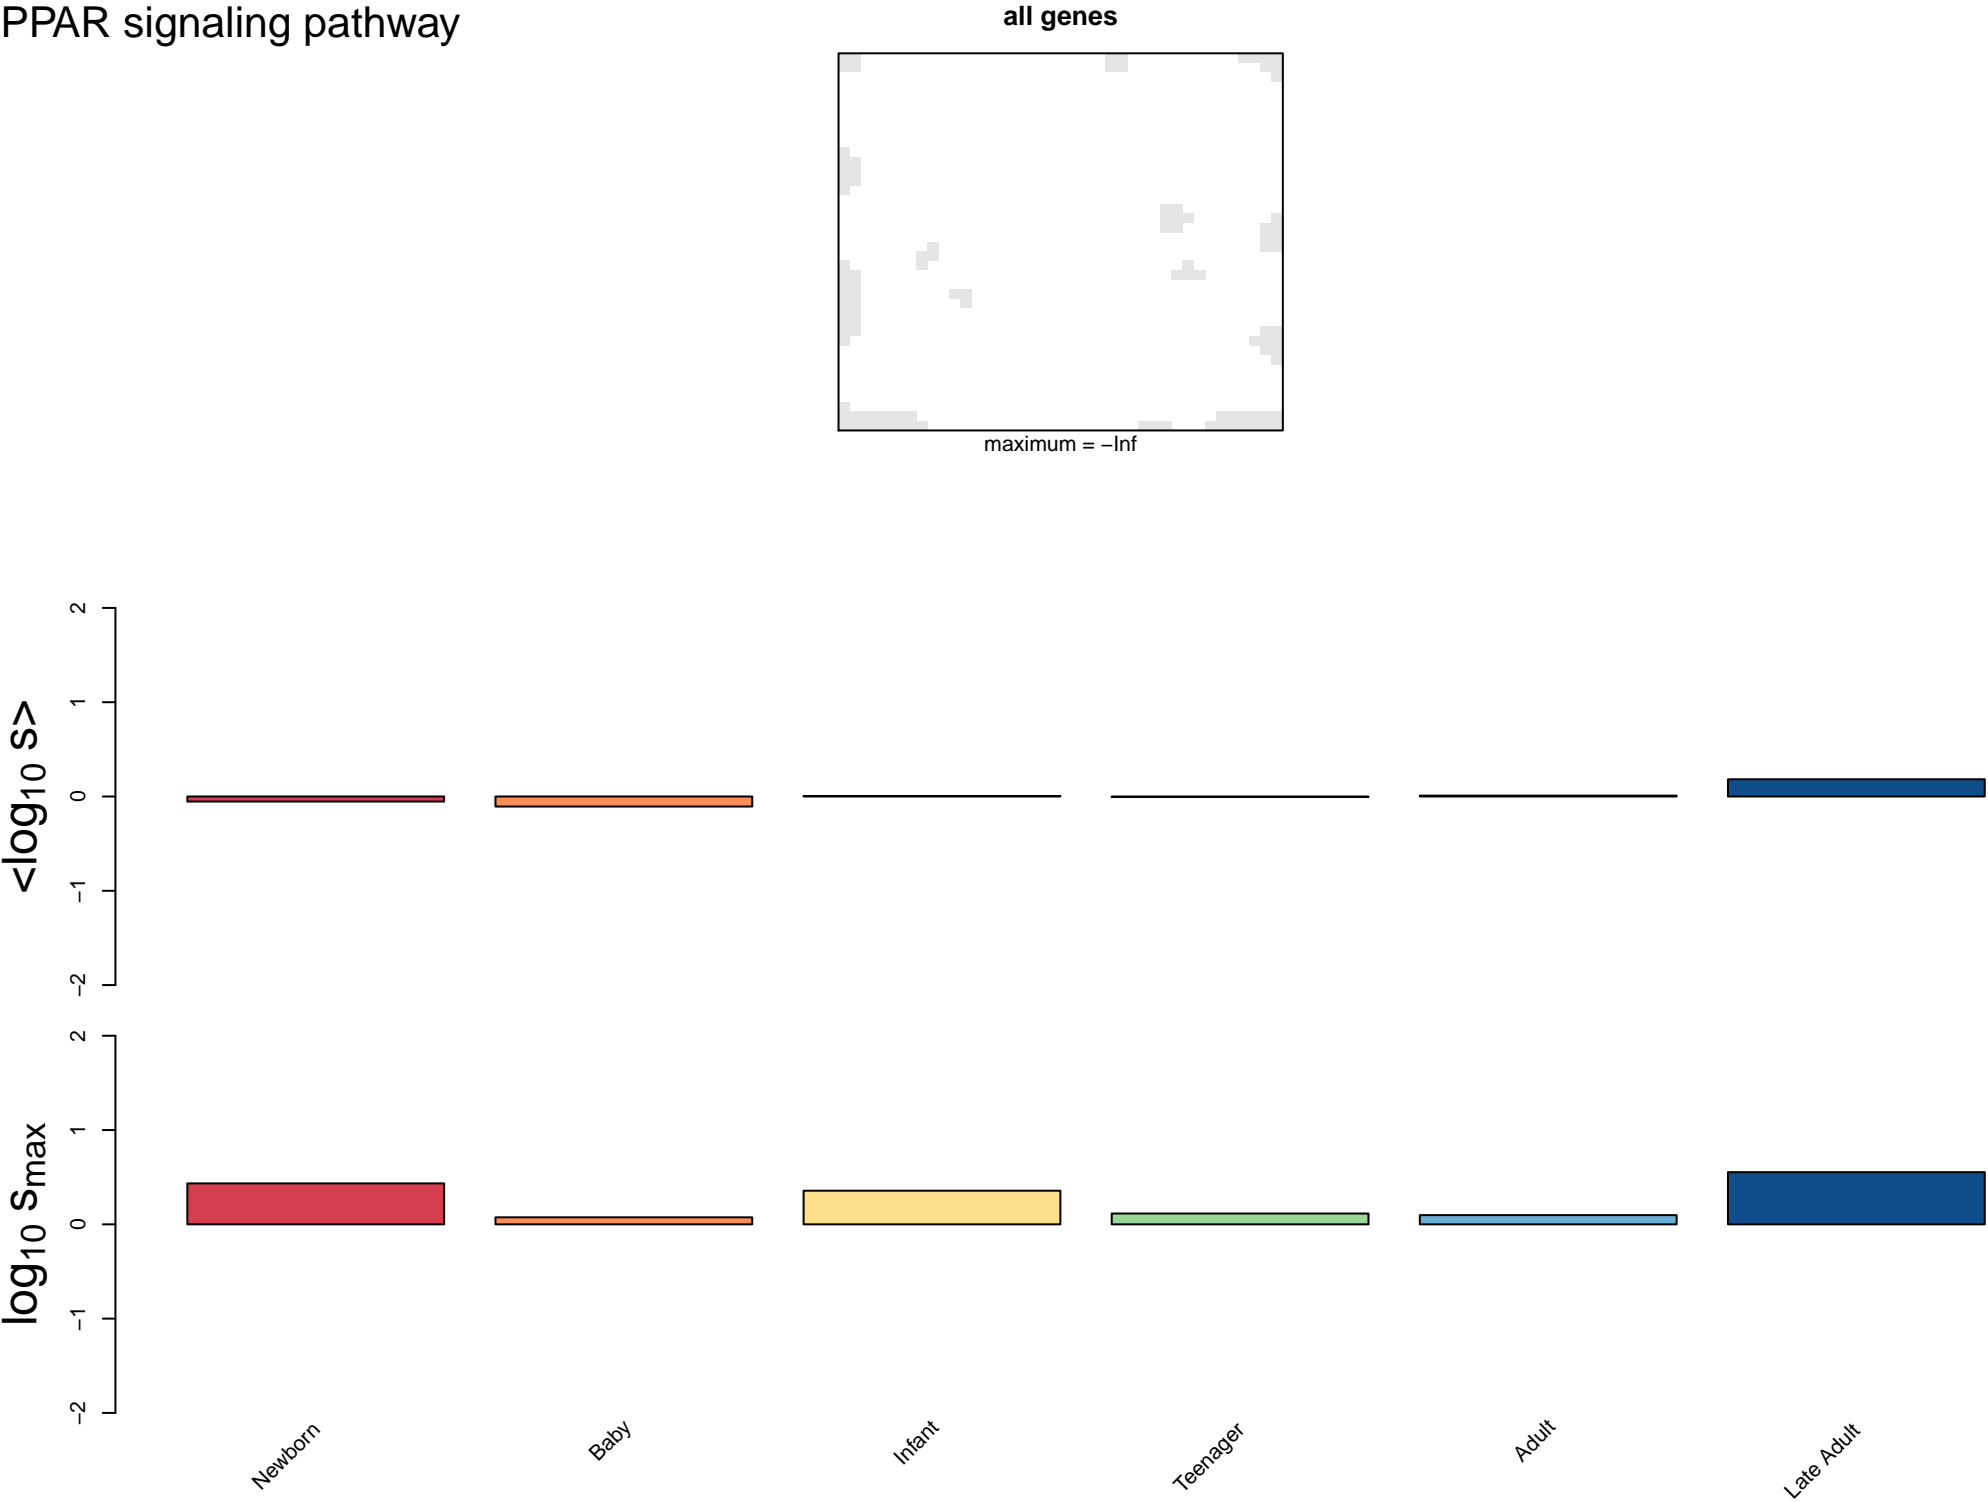

PPAR\_signaling\_pathway  
genes with data

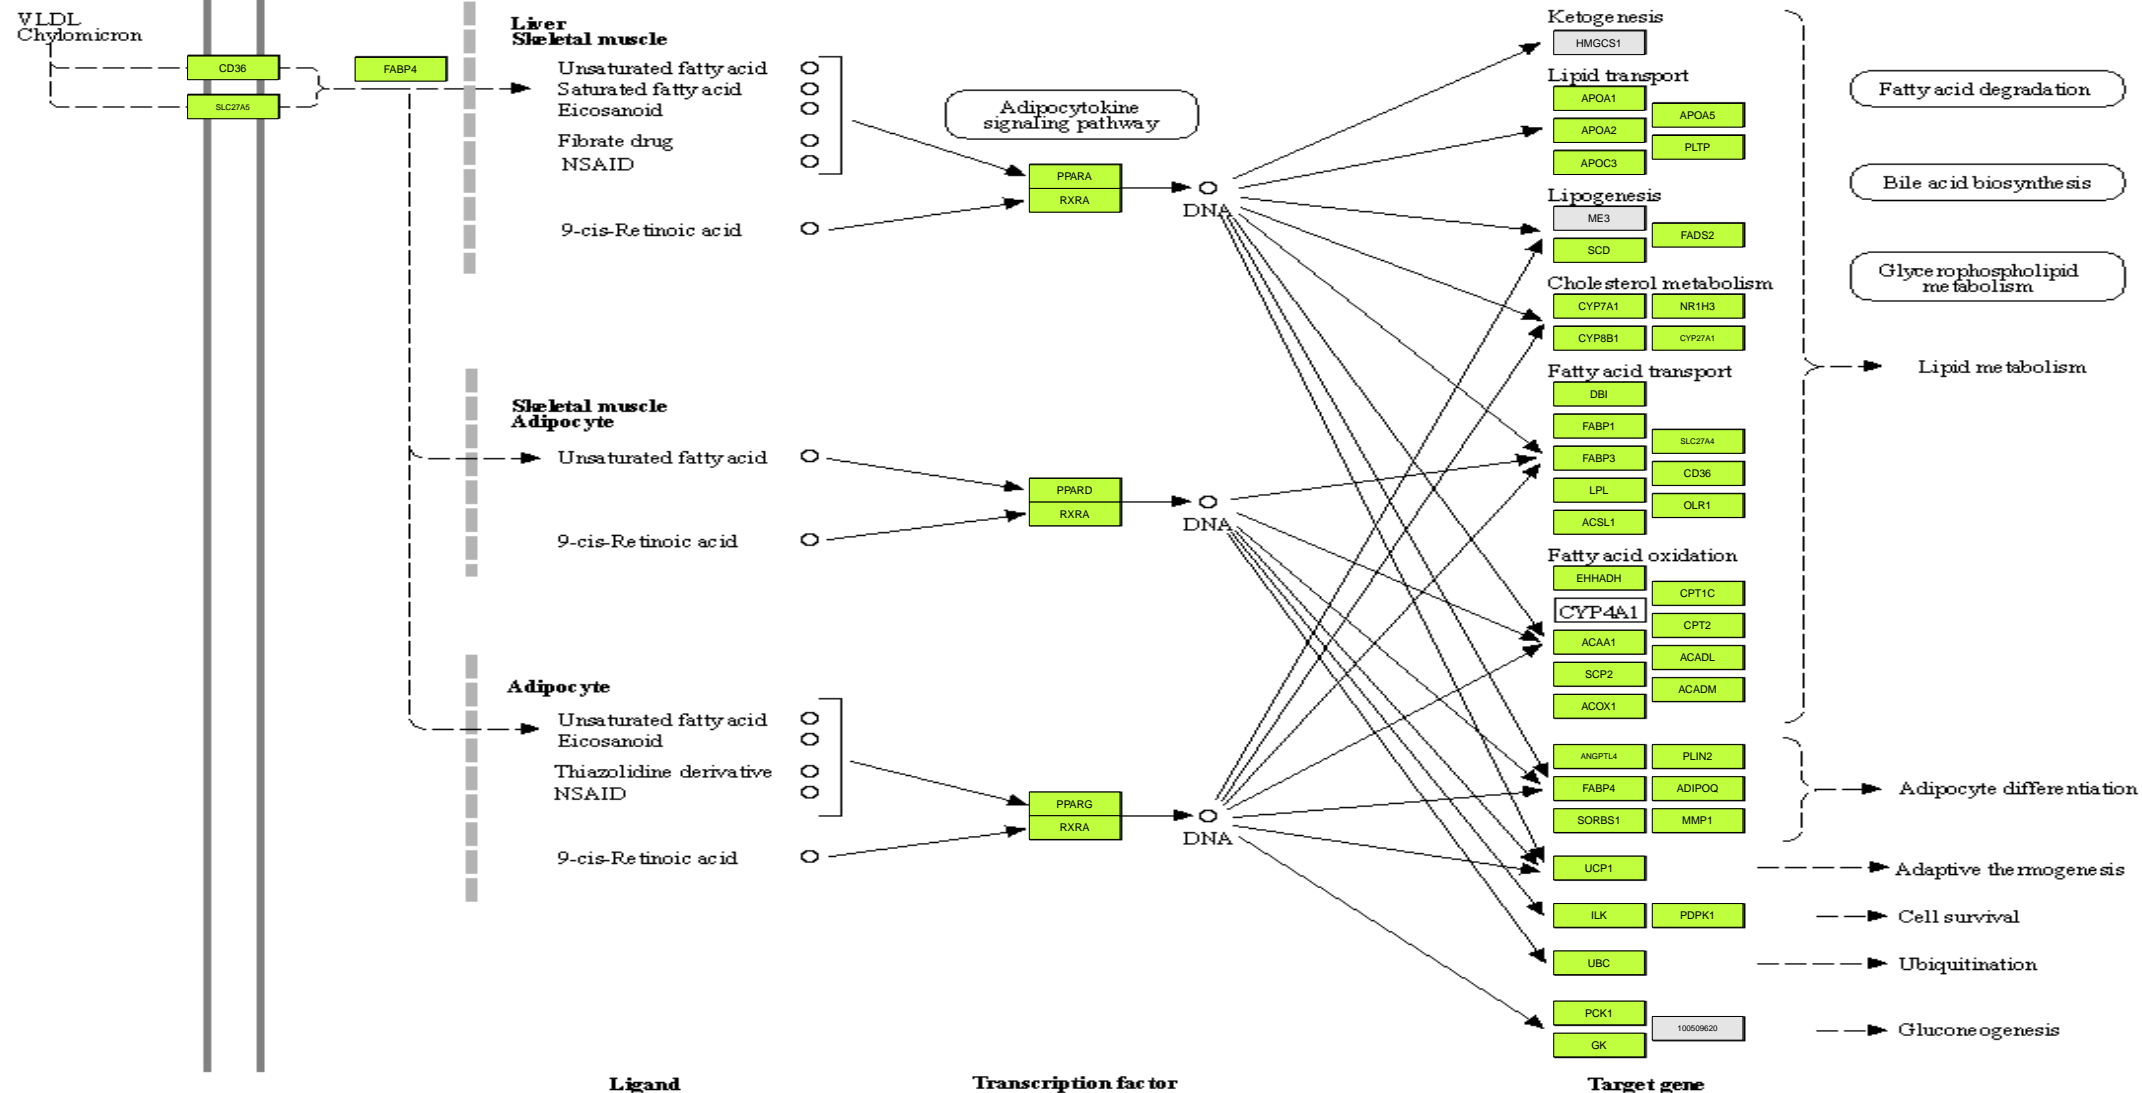

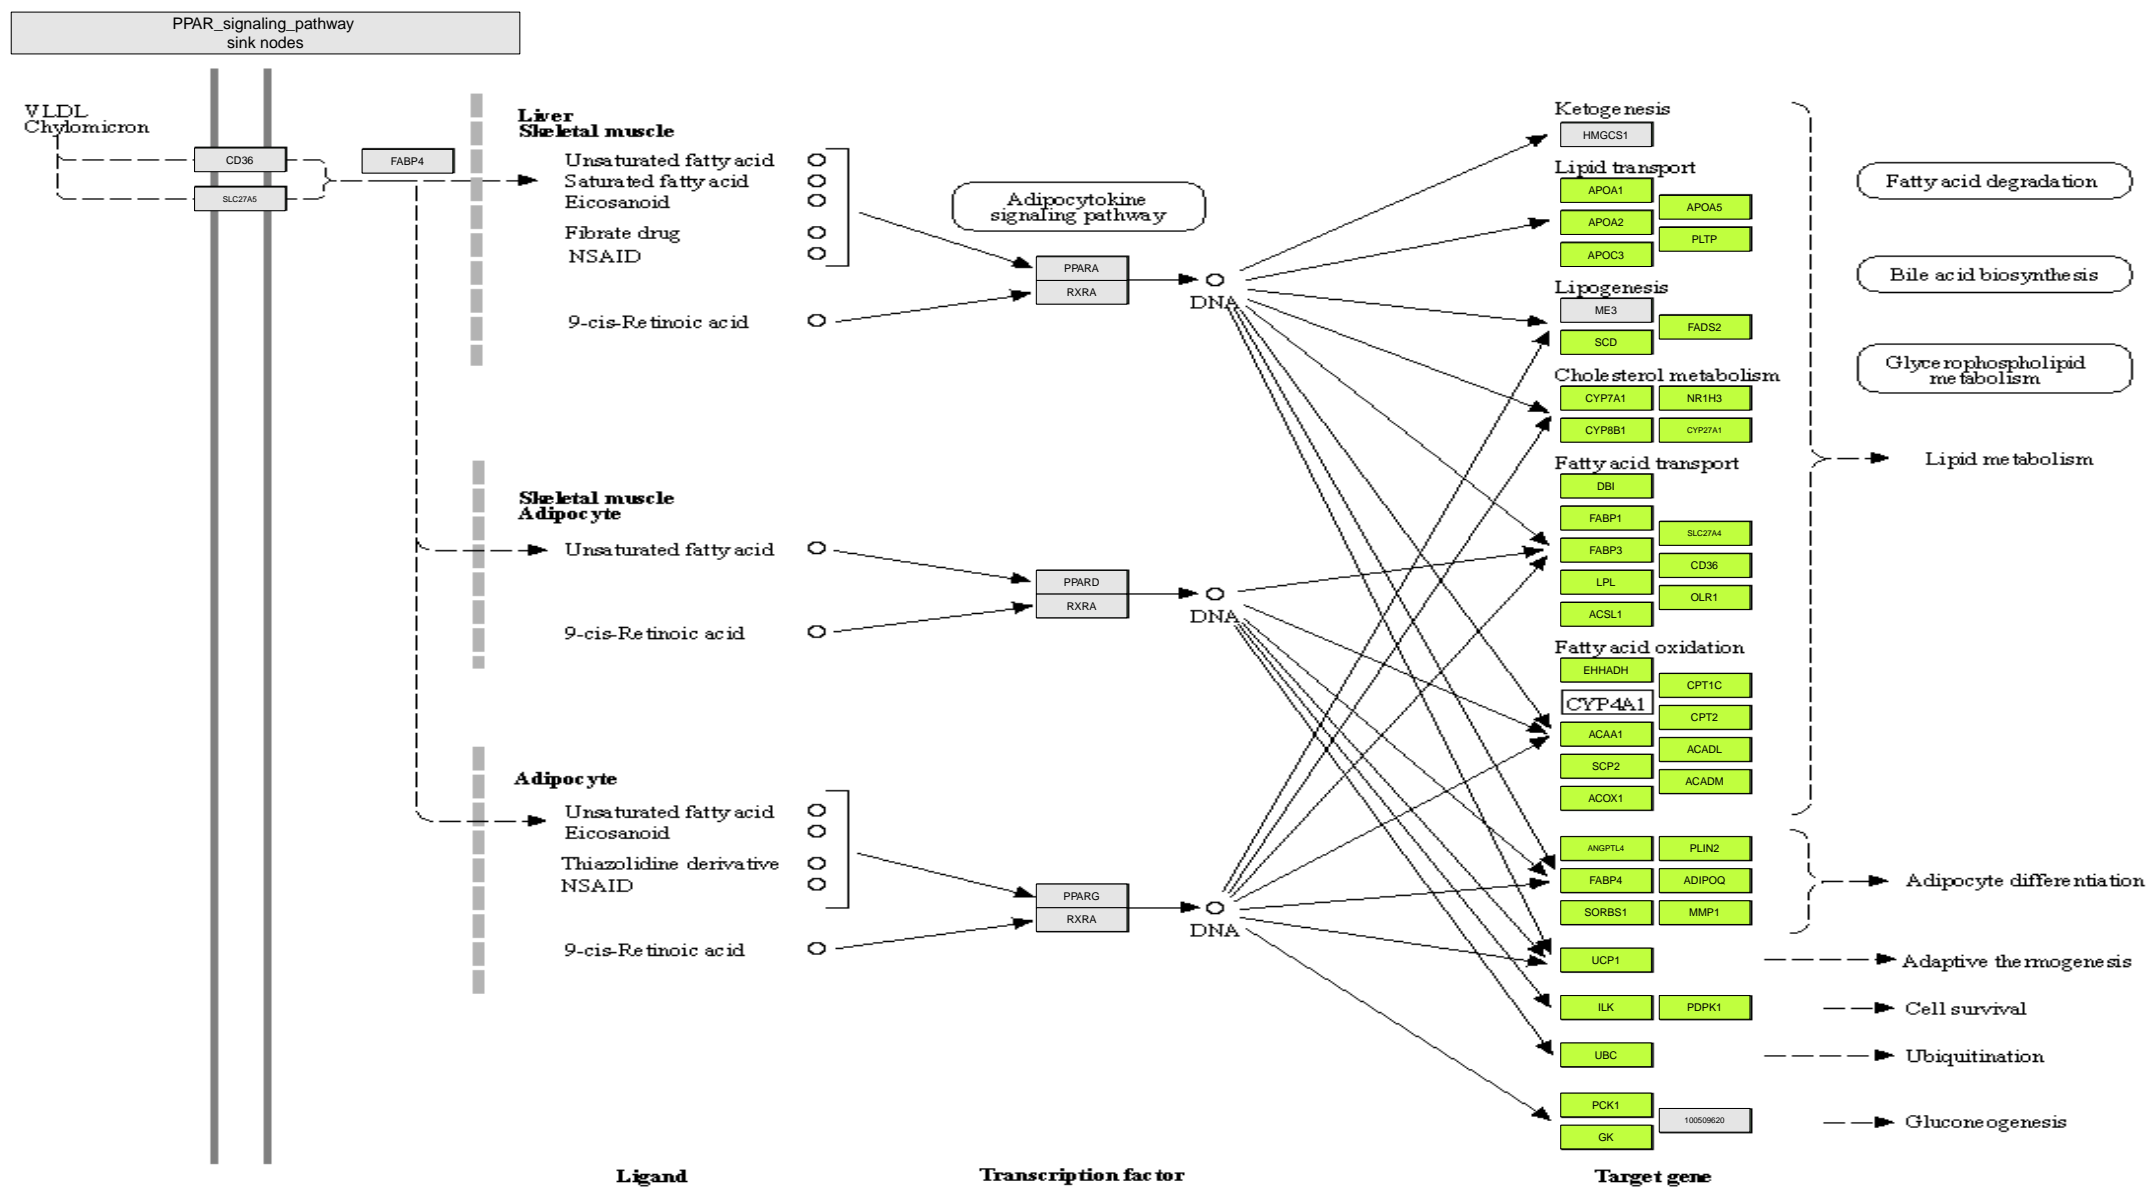



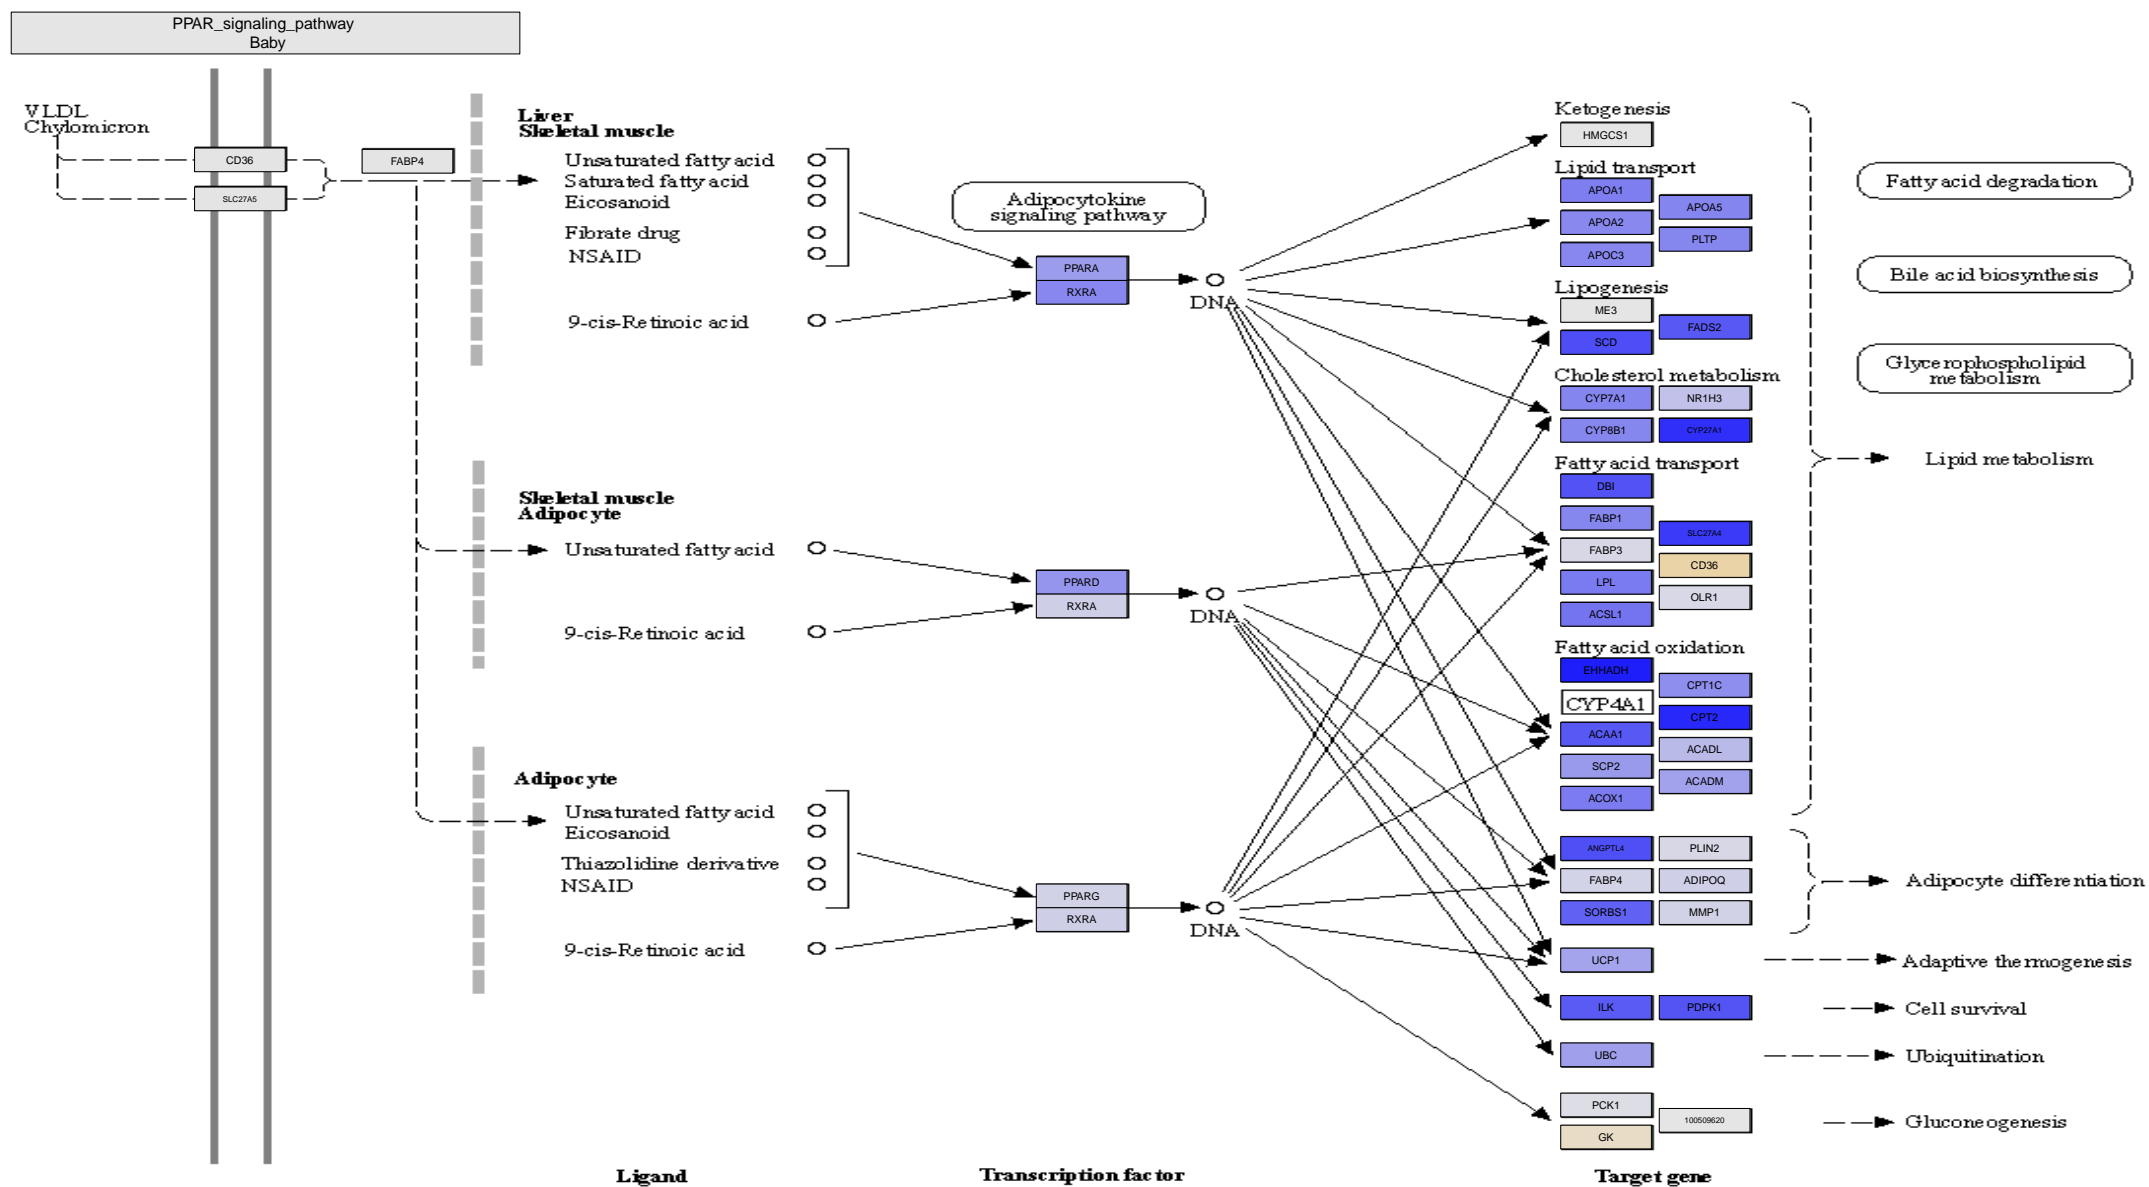



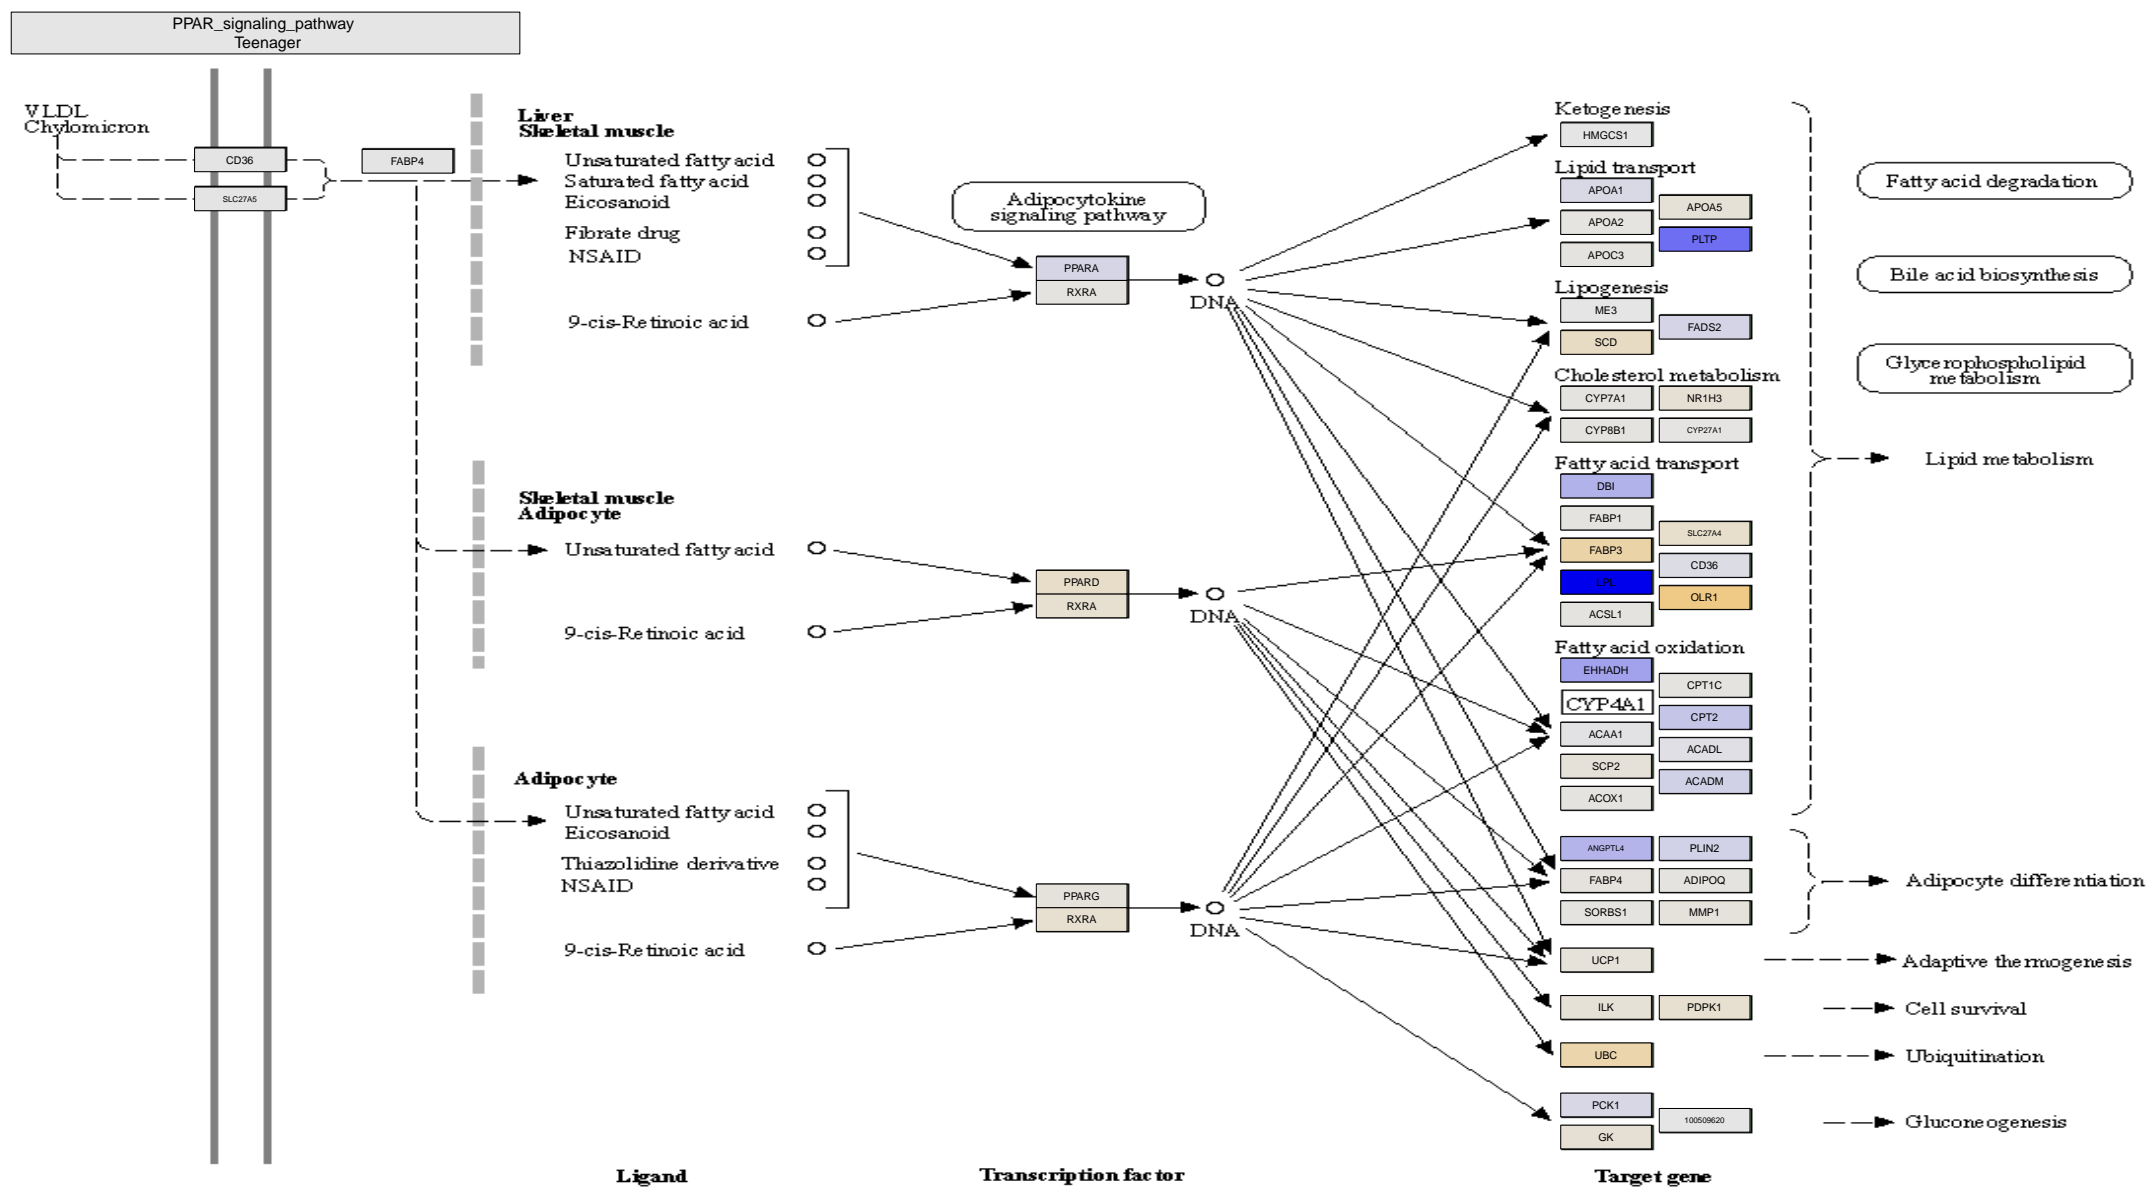

PPAR\_signaling\_pathway  
Adult

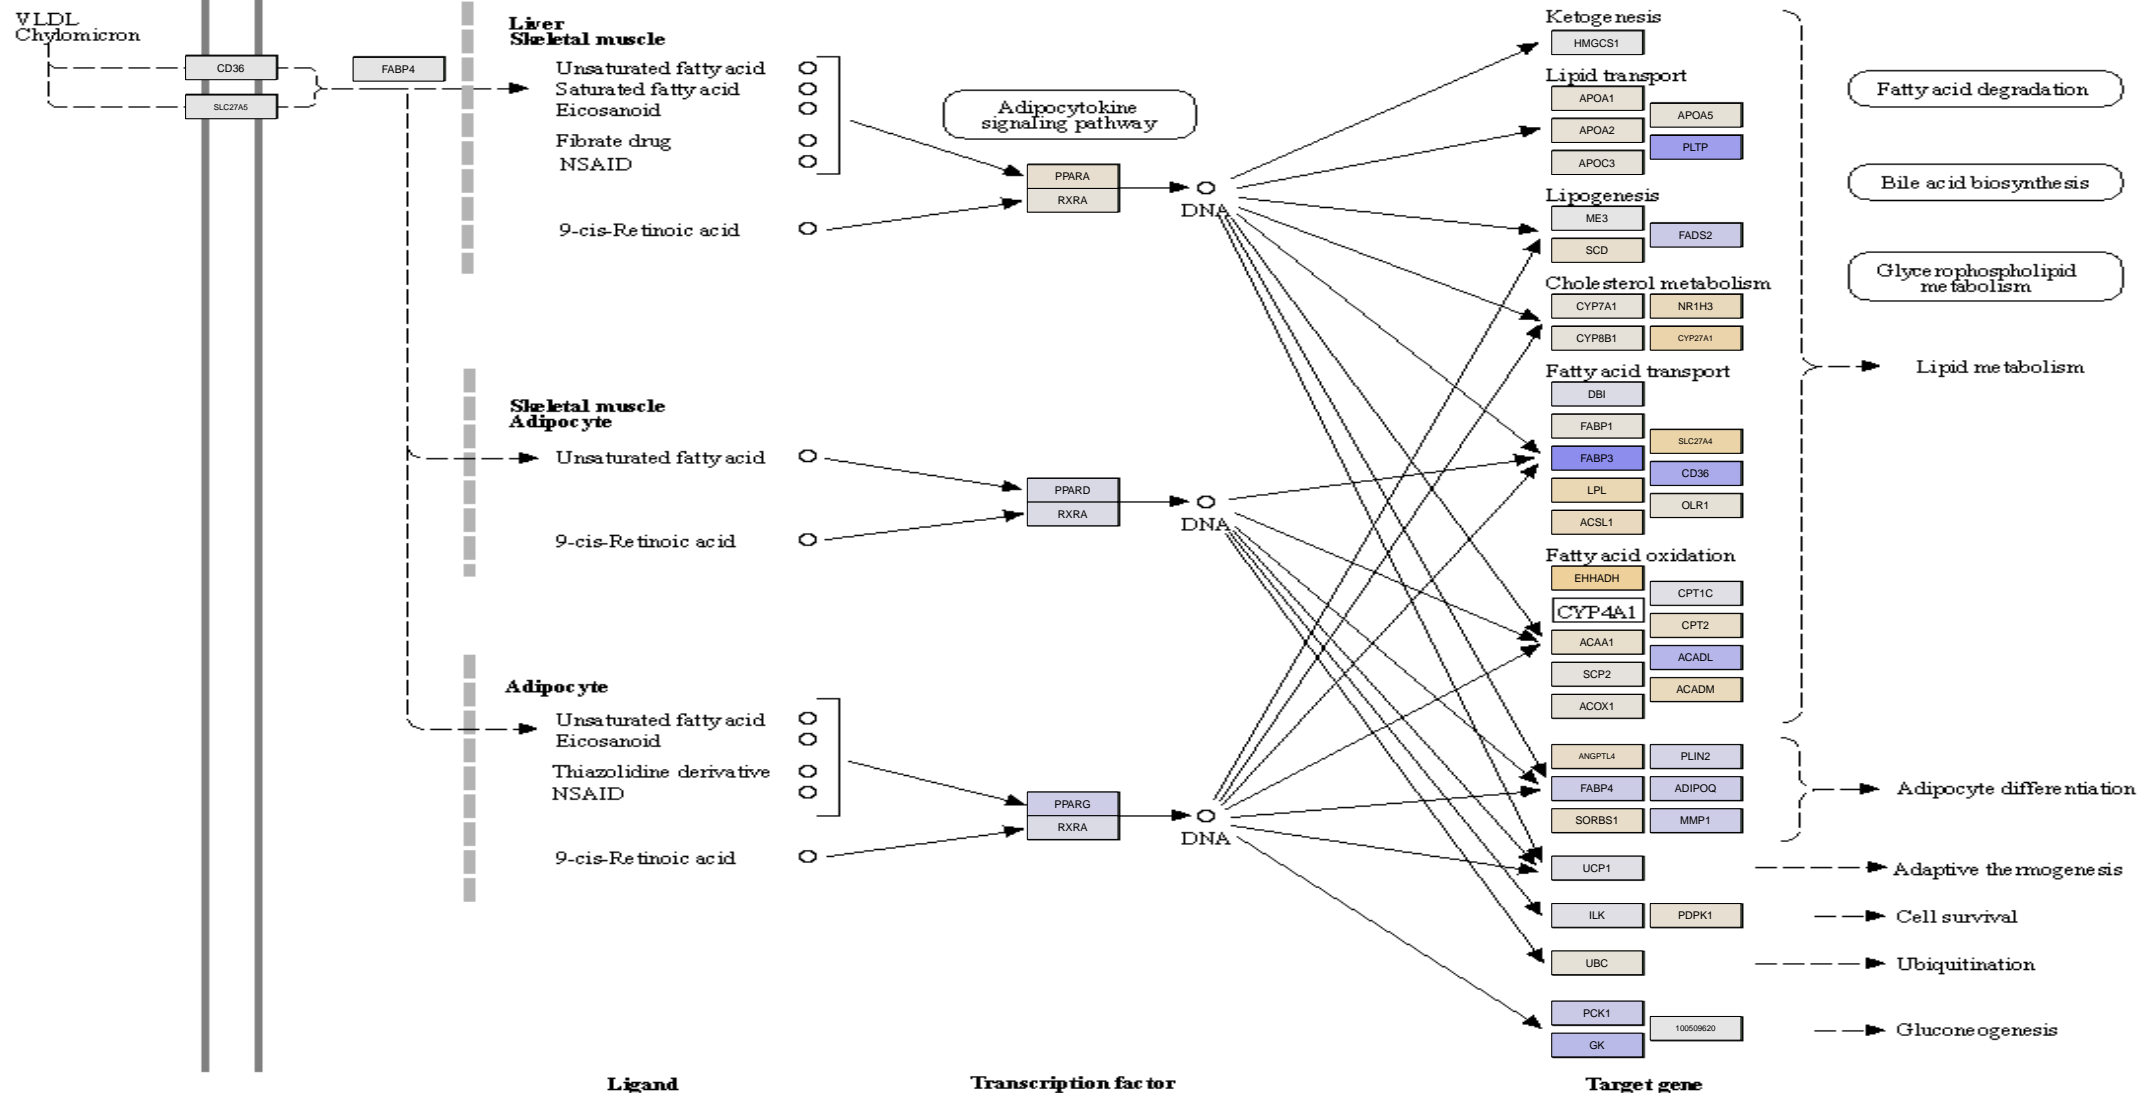



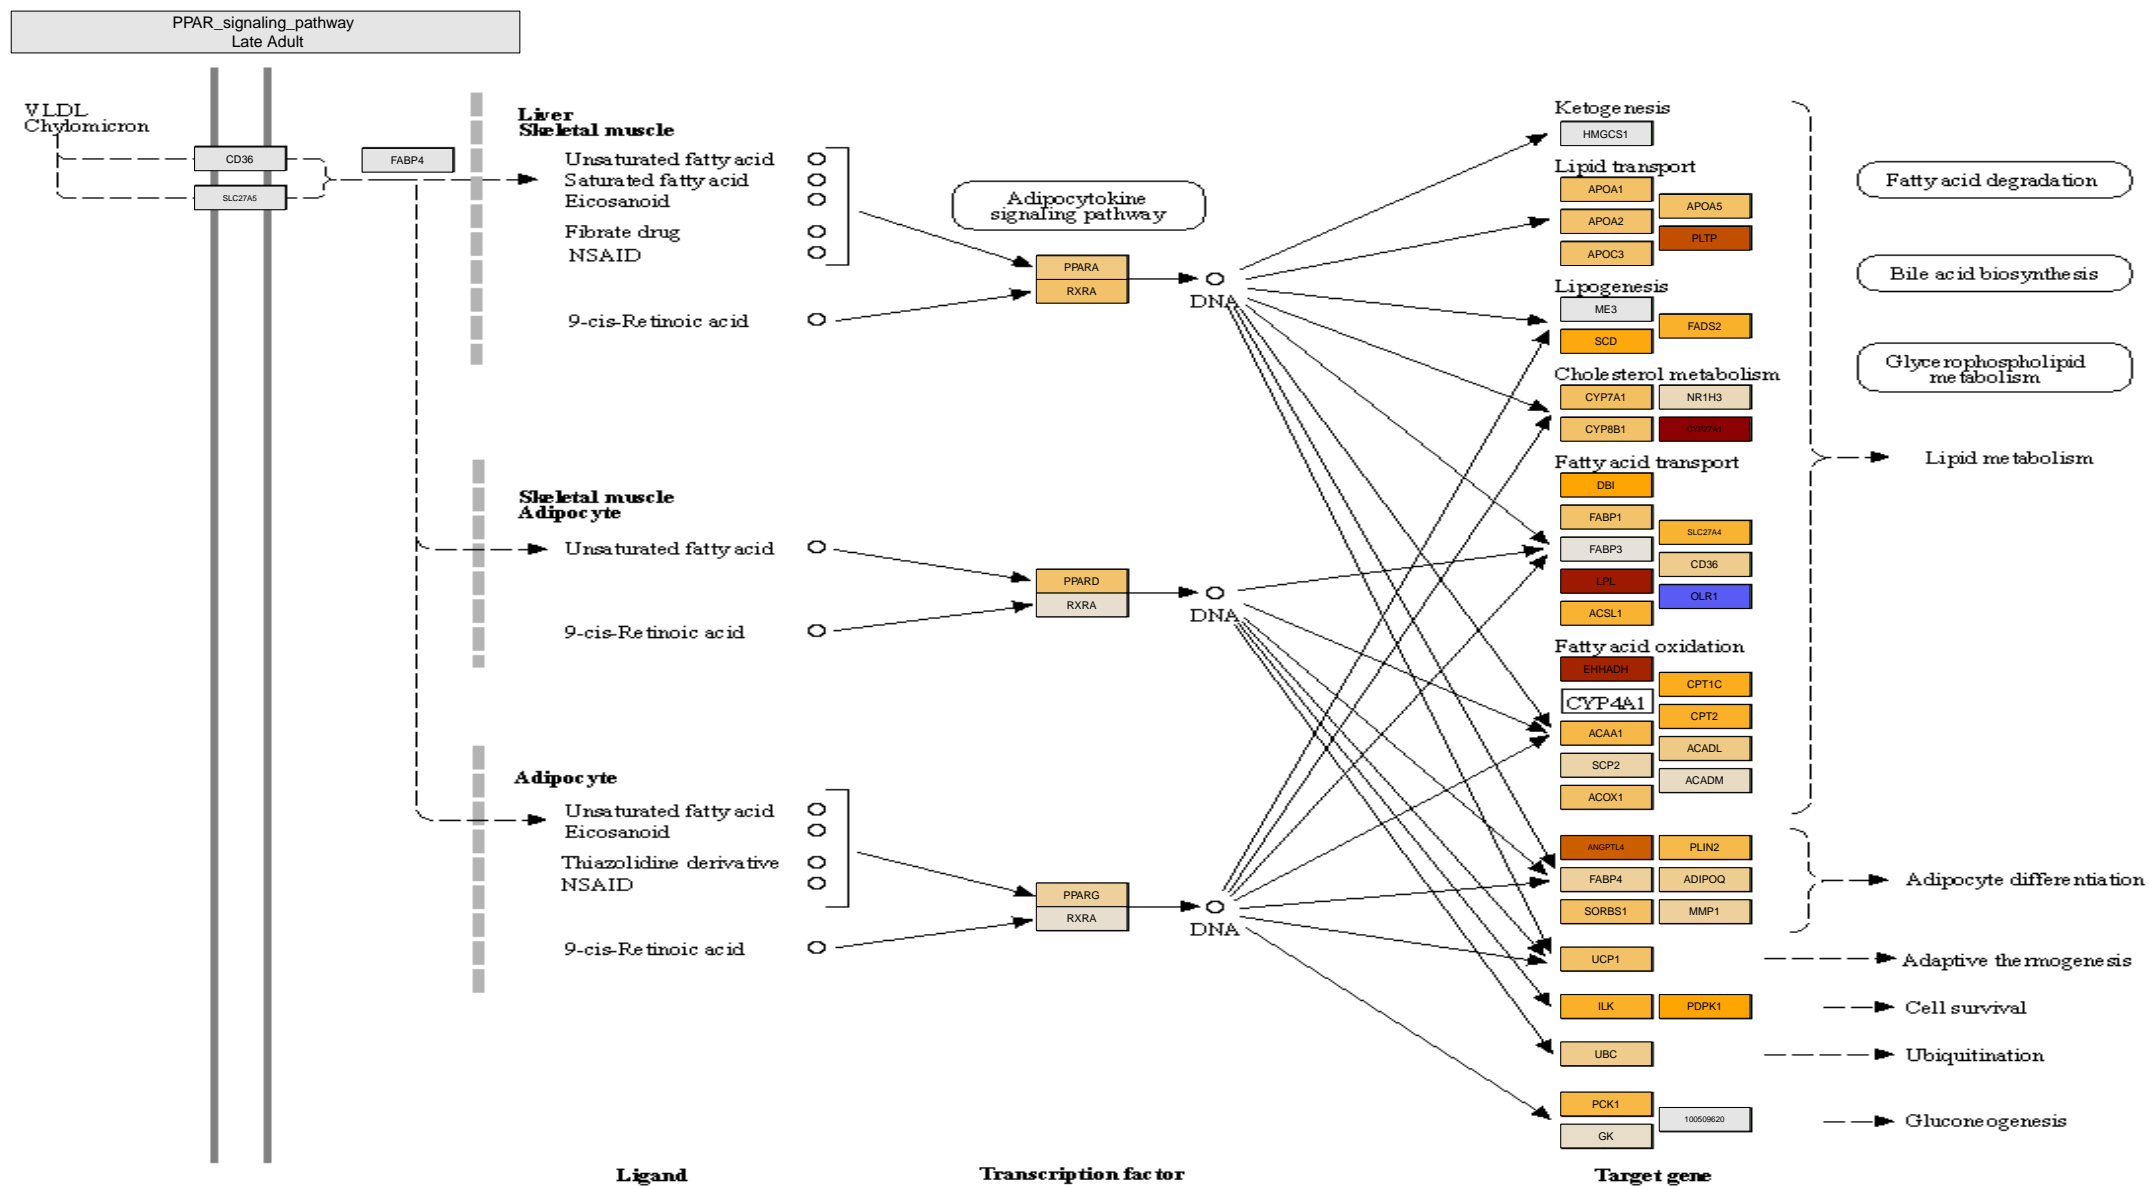

Supplement: s1 [file s1]

Epithelial cell signaling in Helicobact

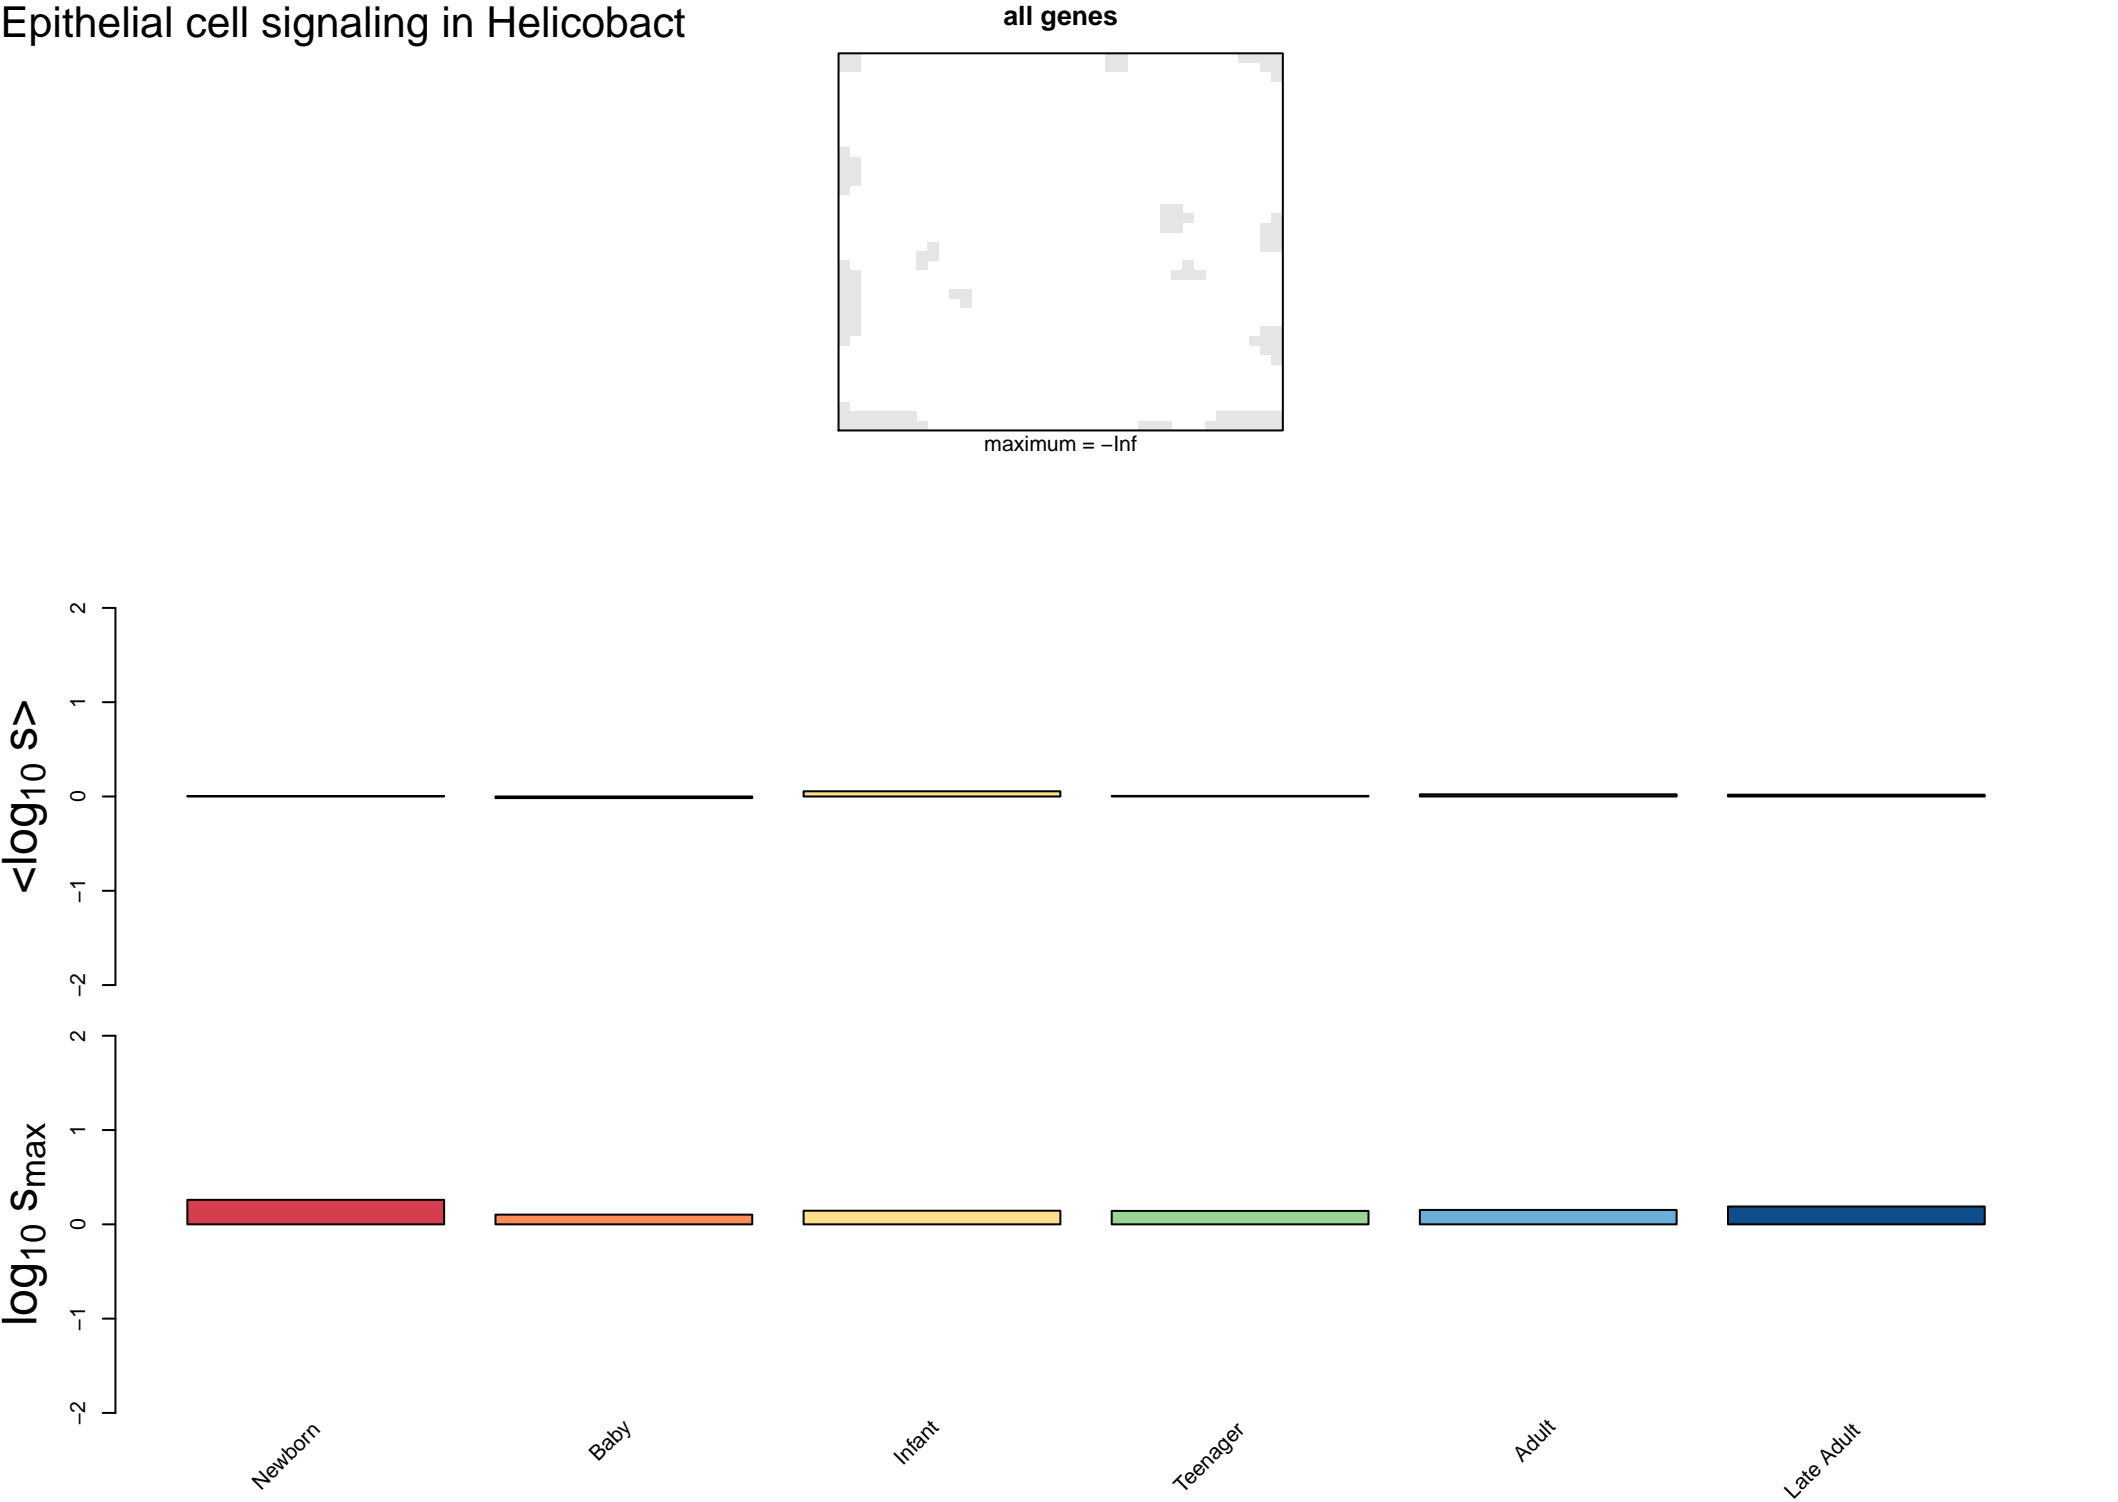

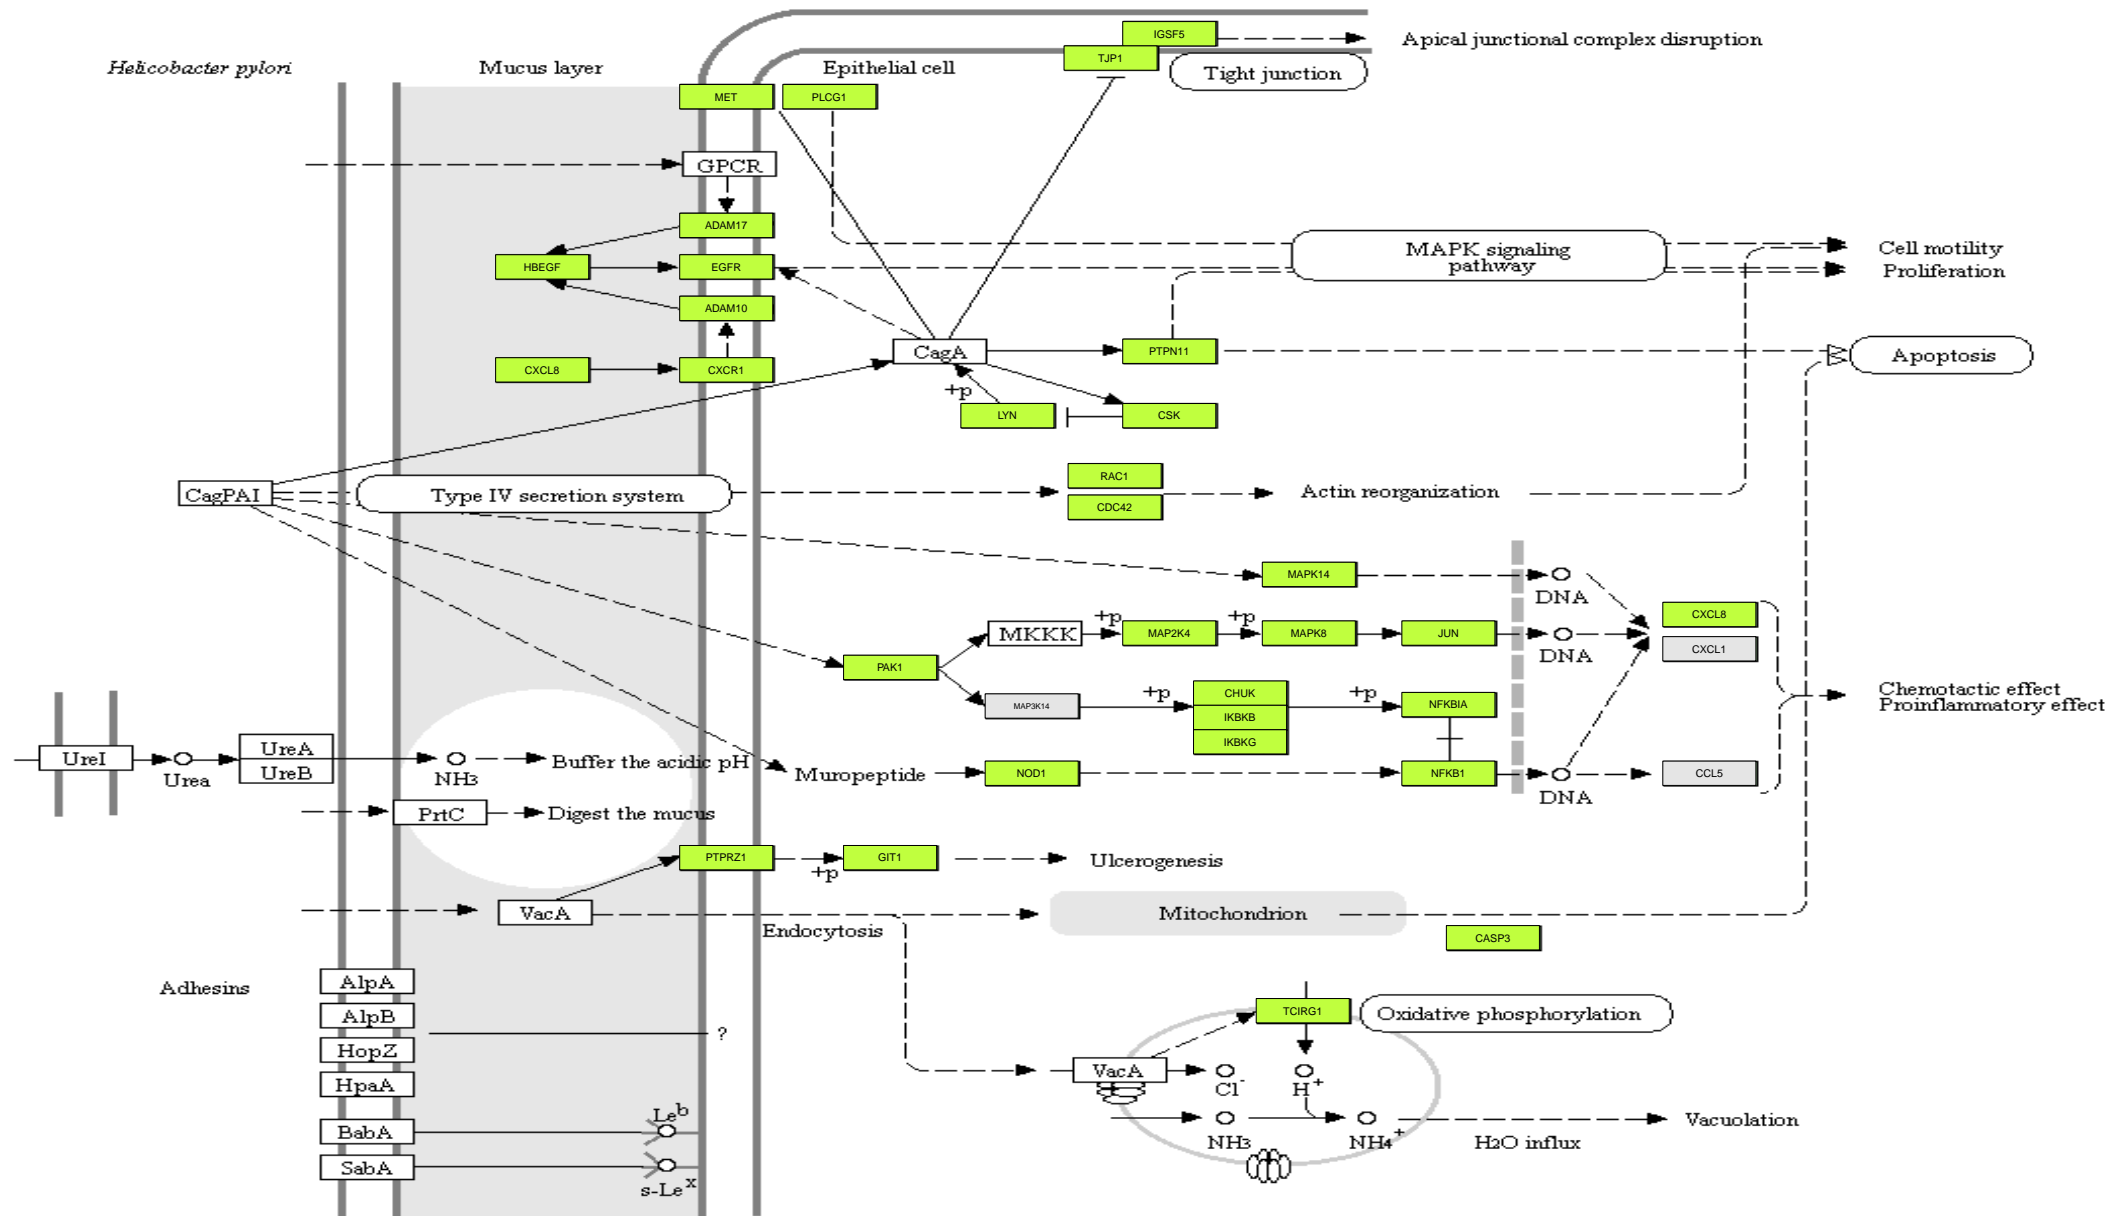

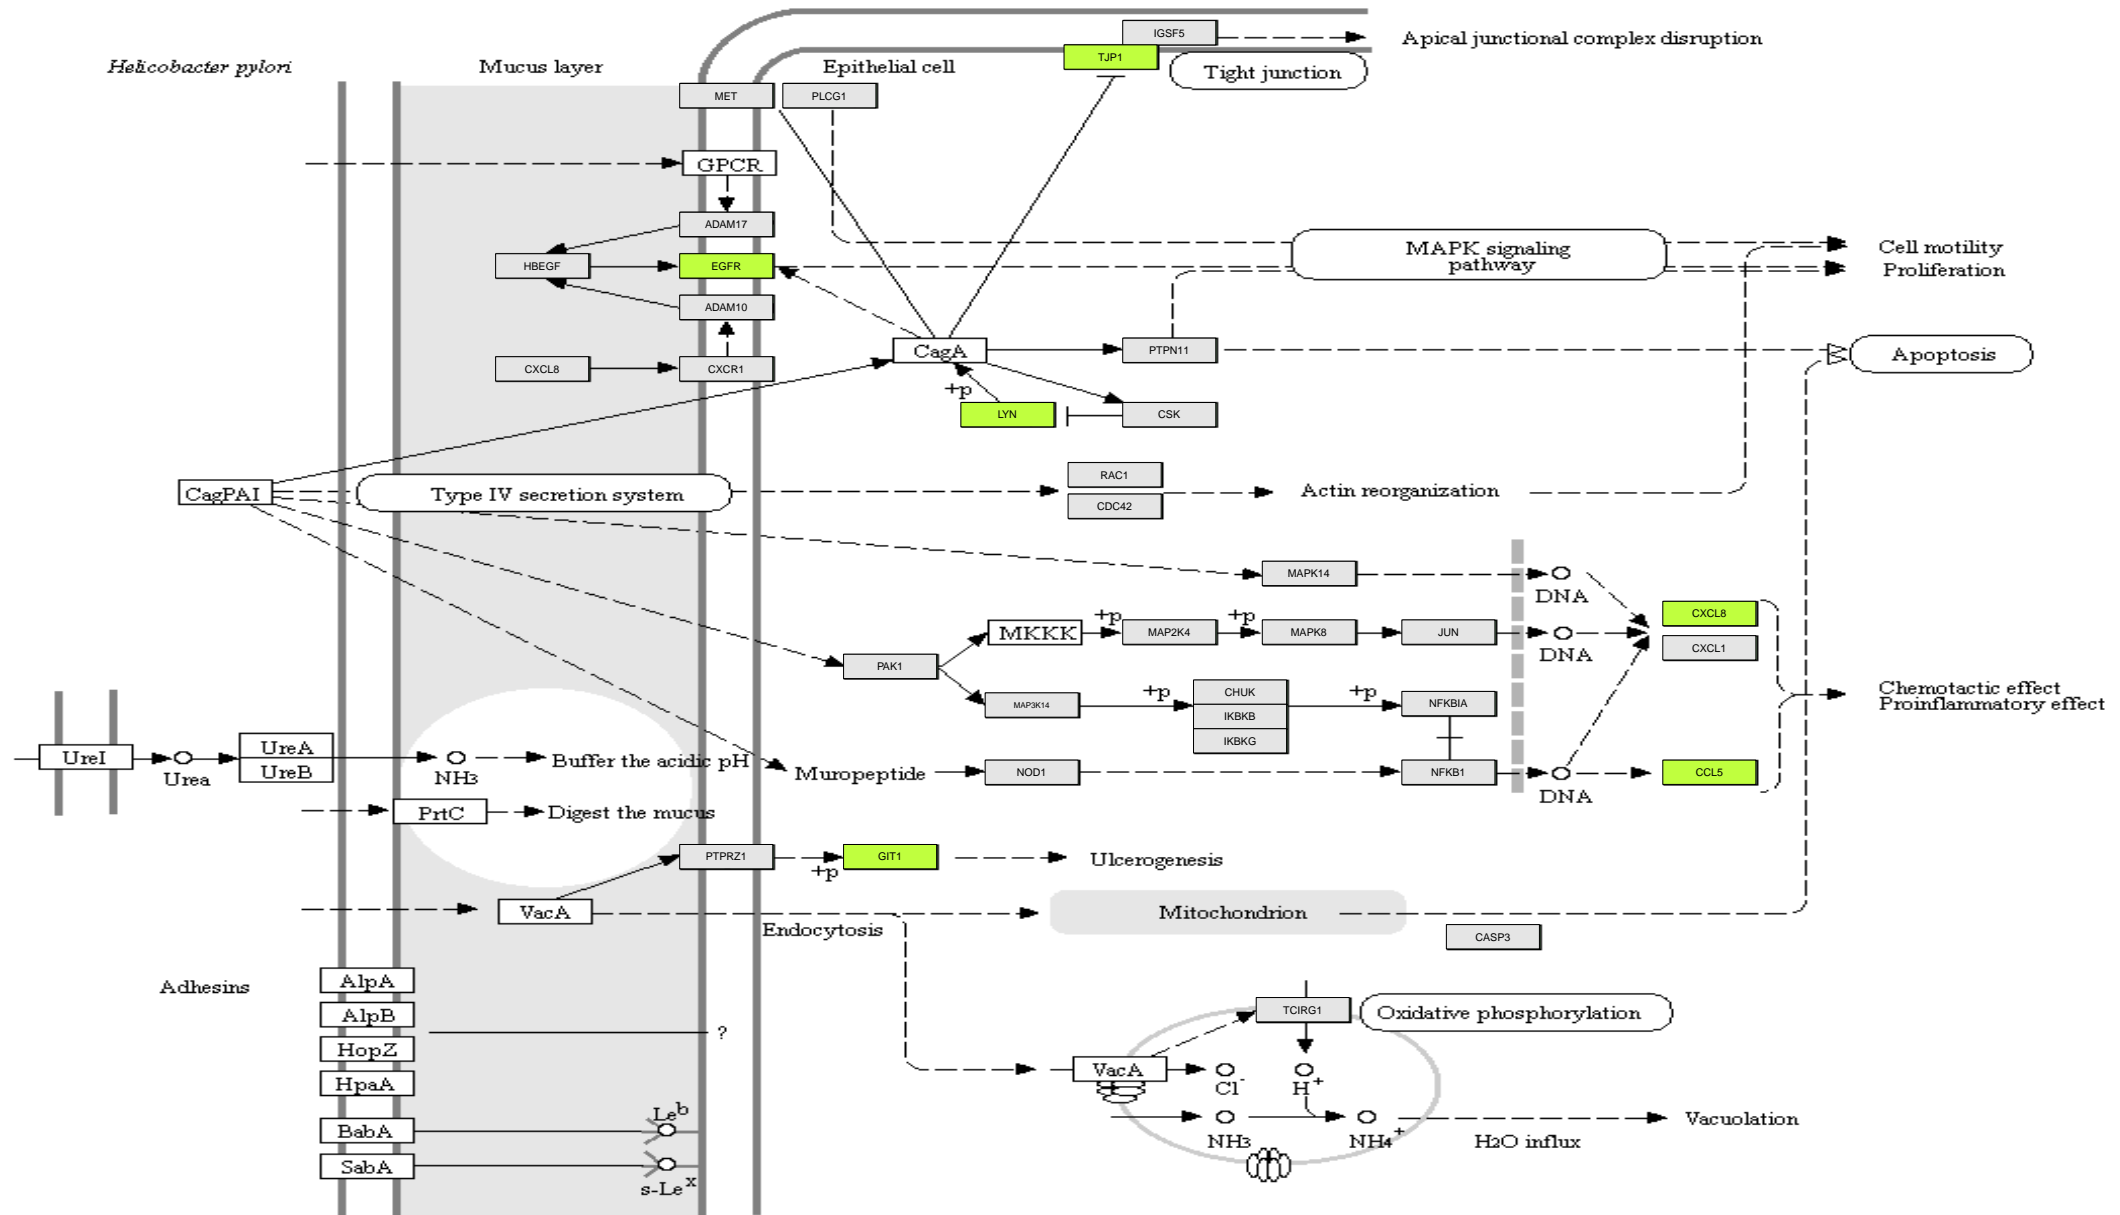

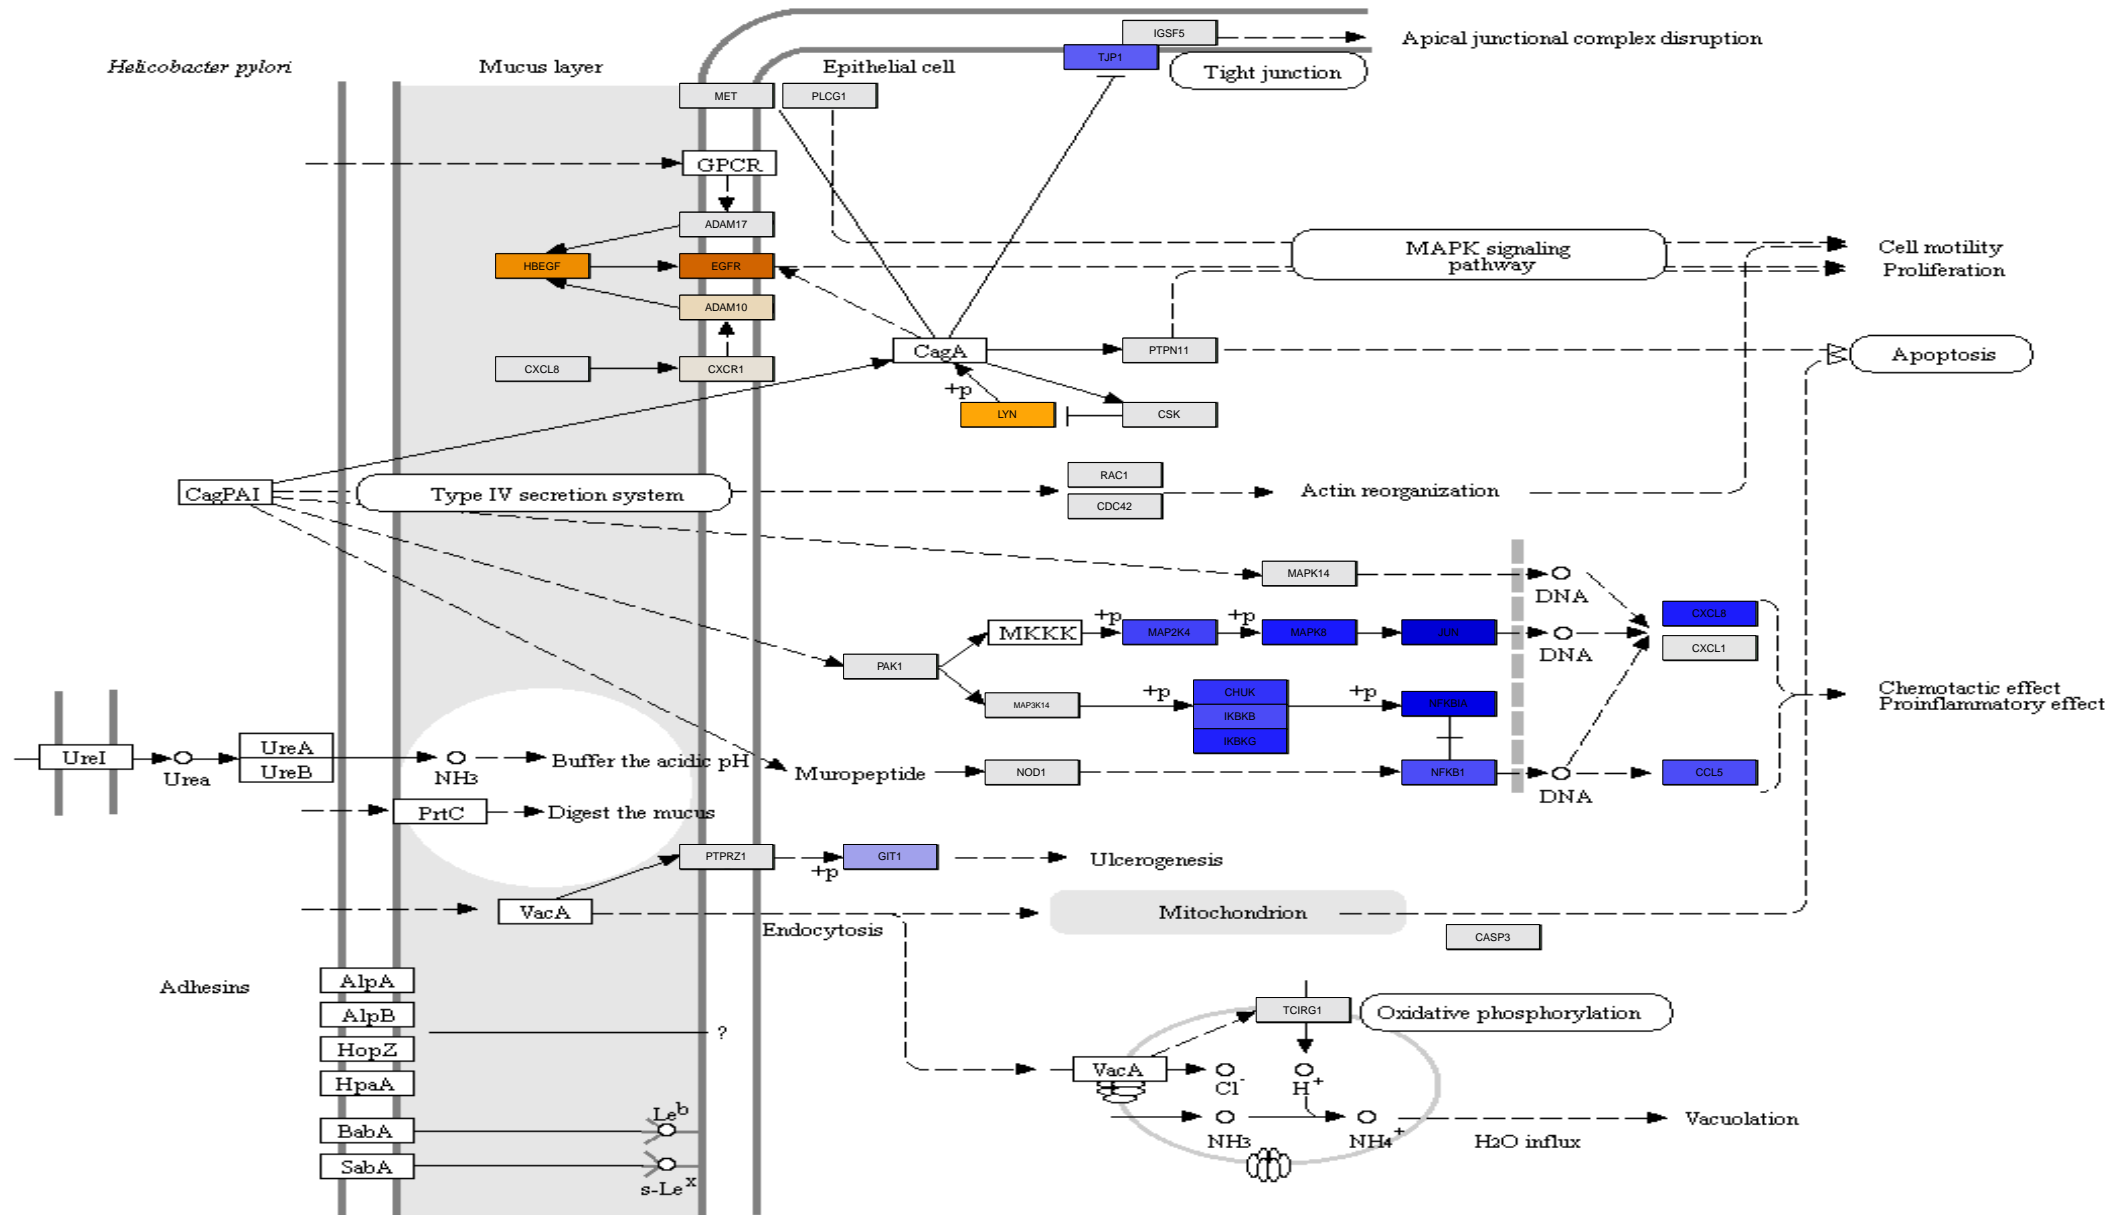

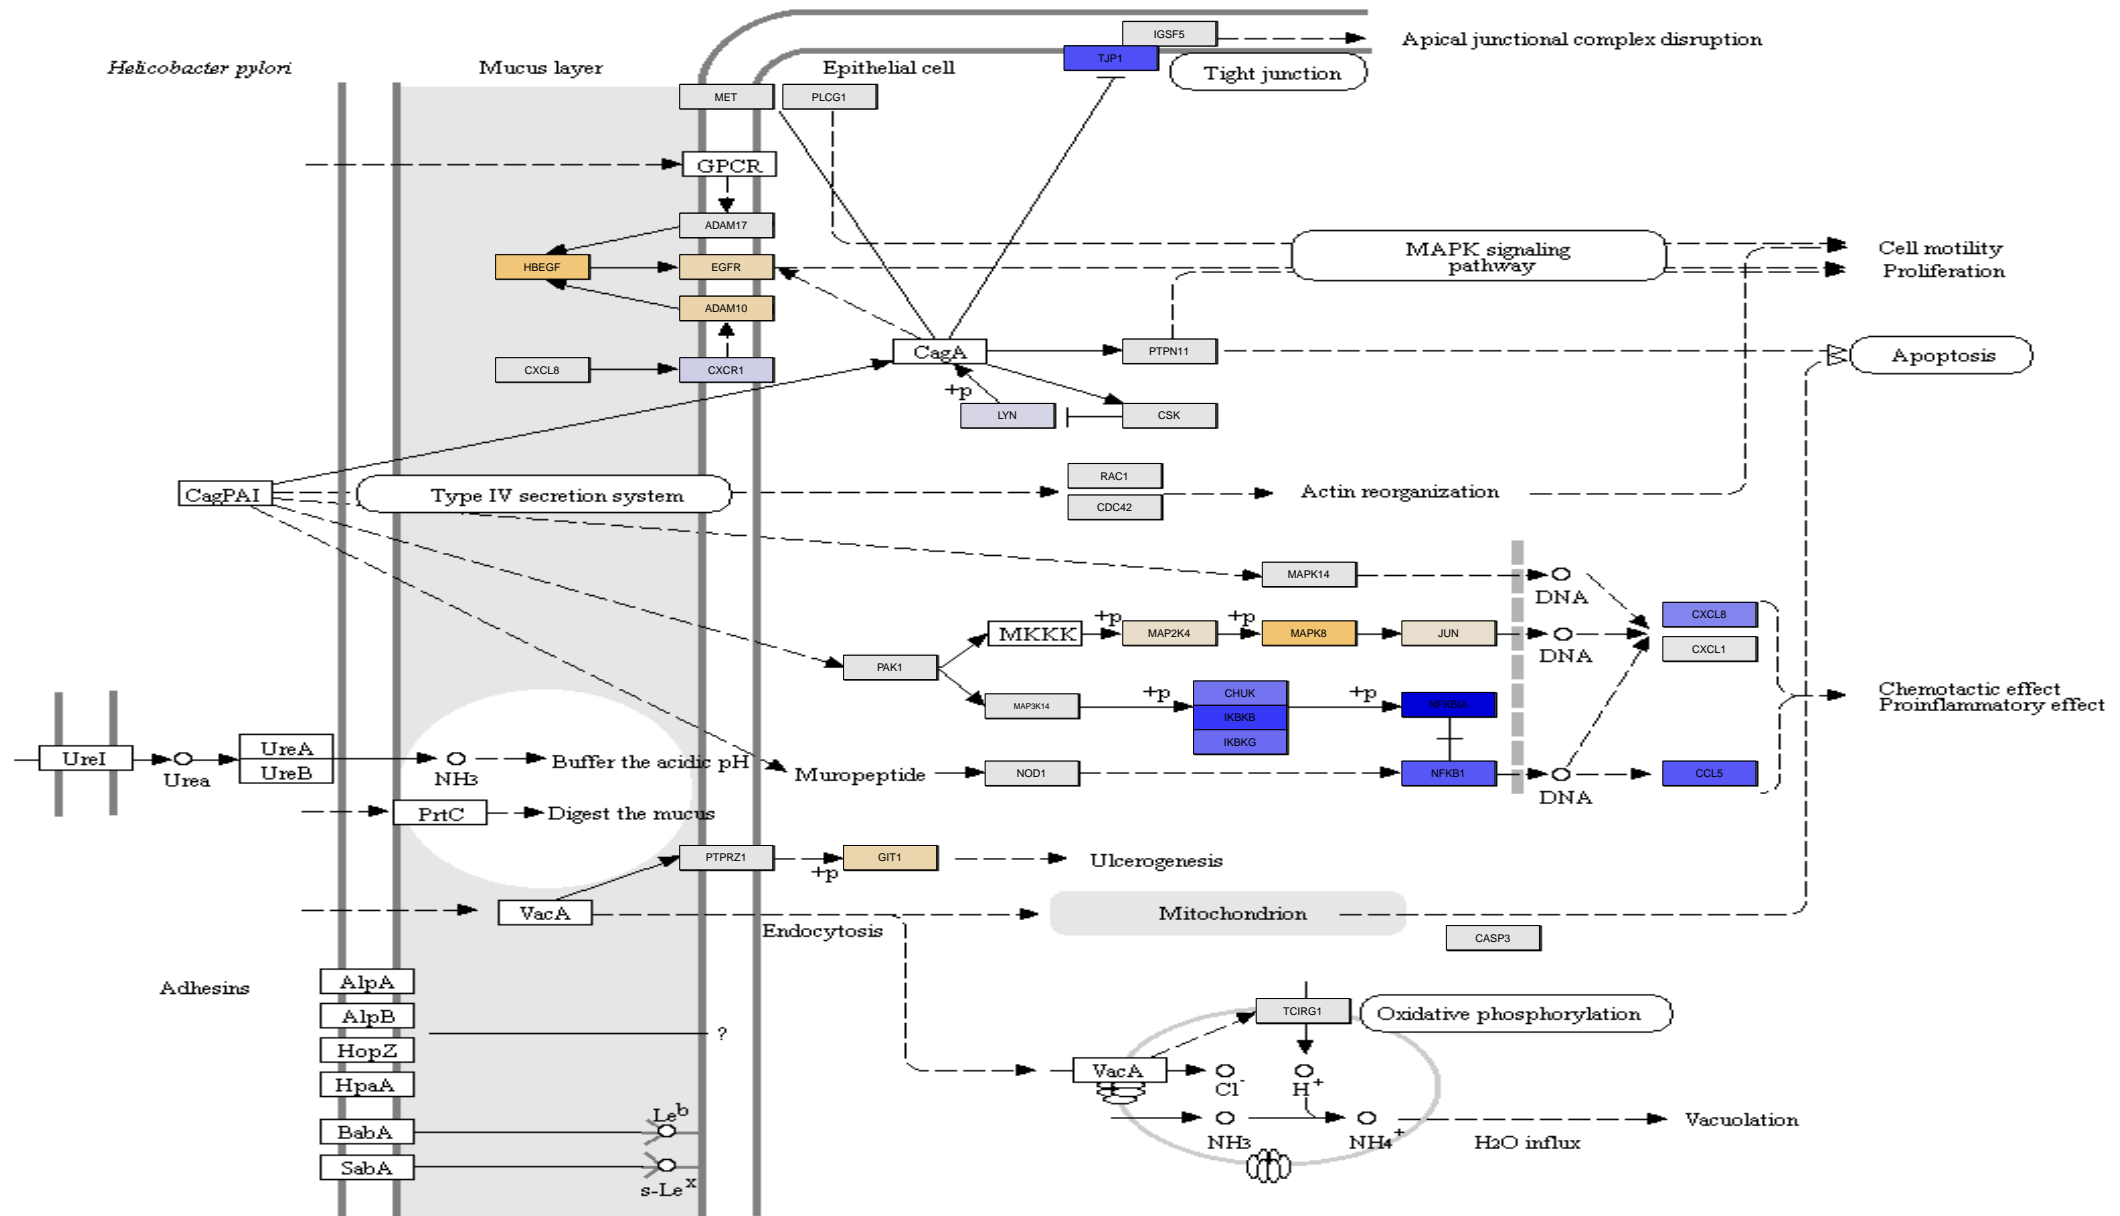

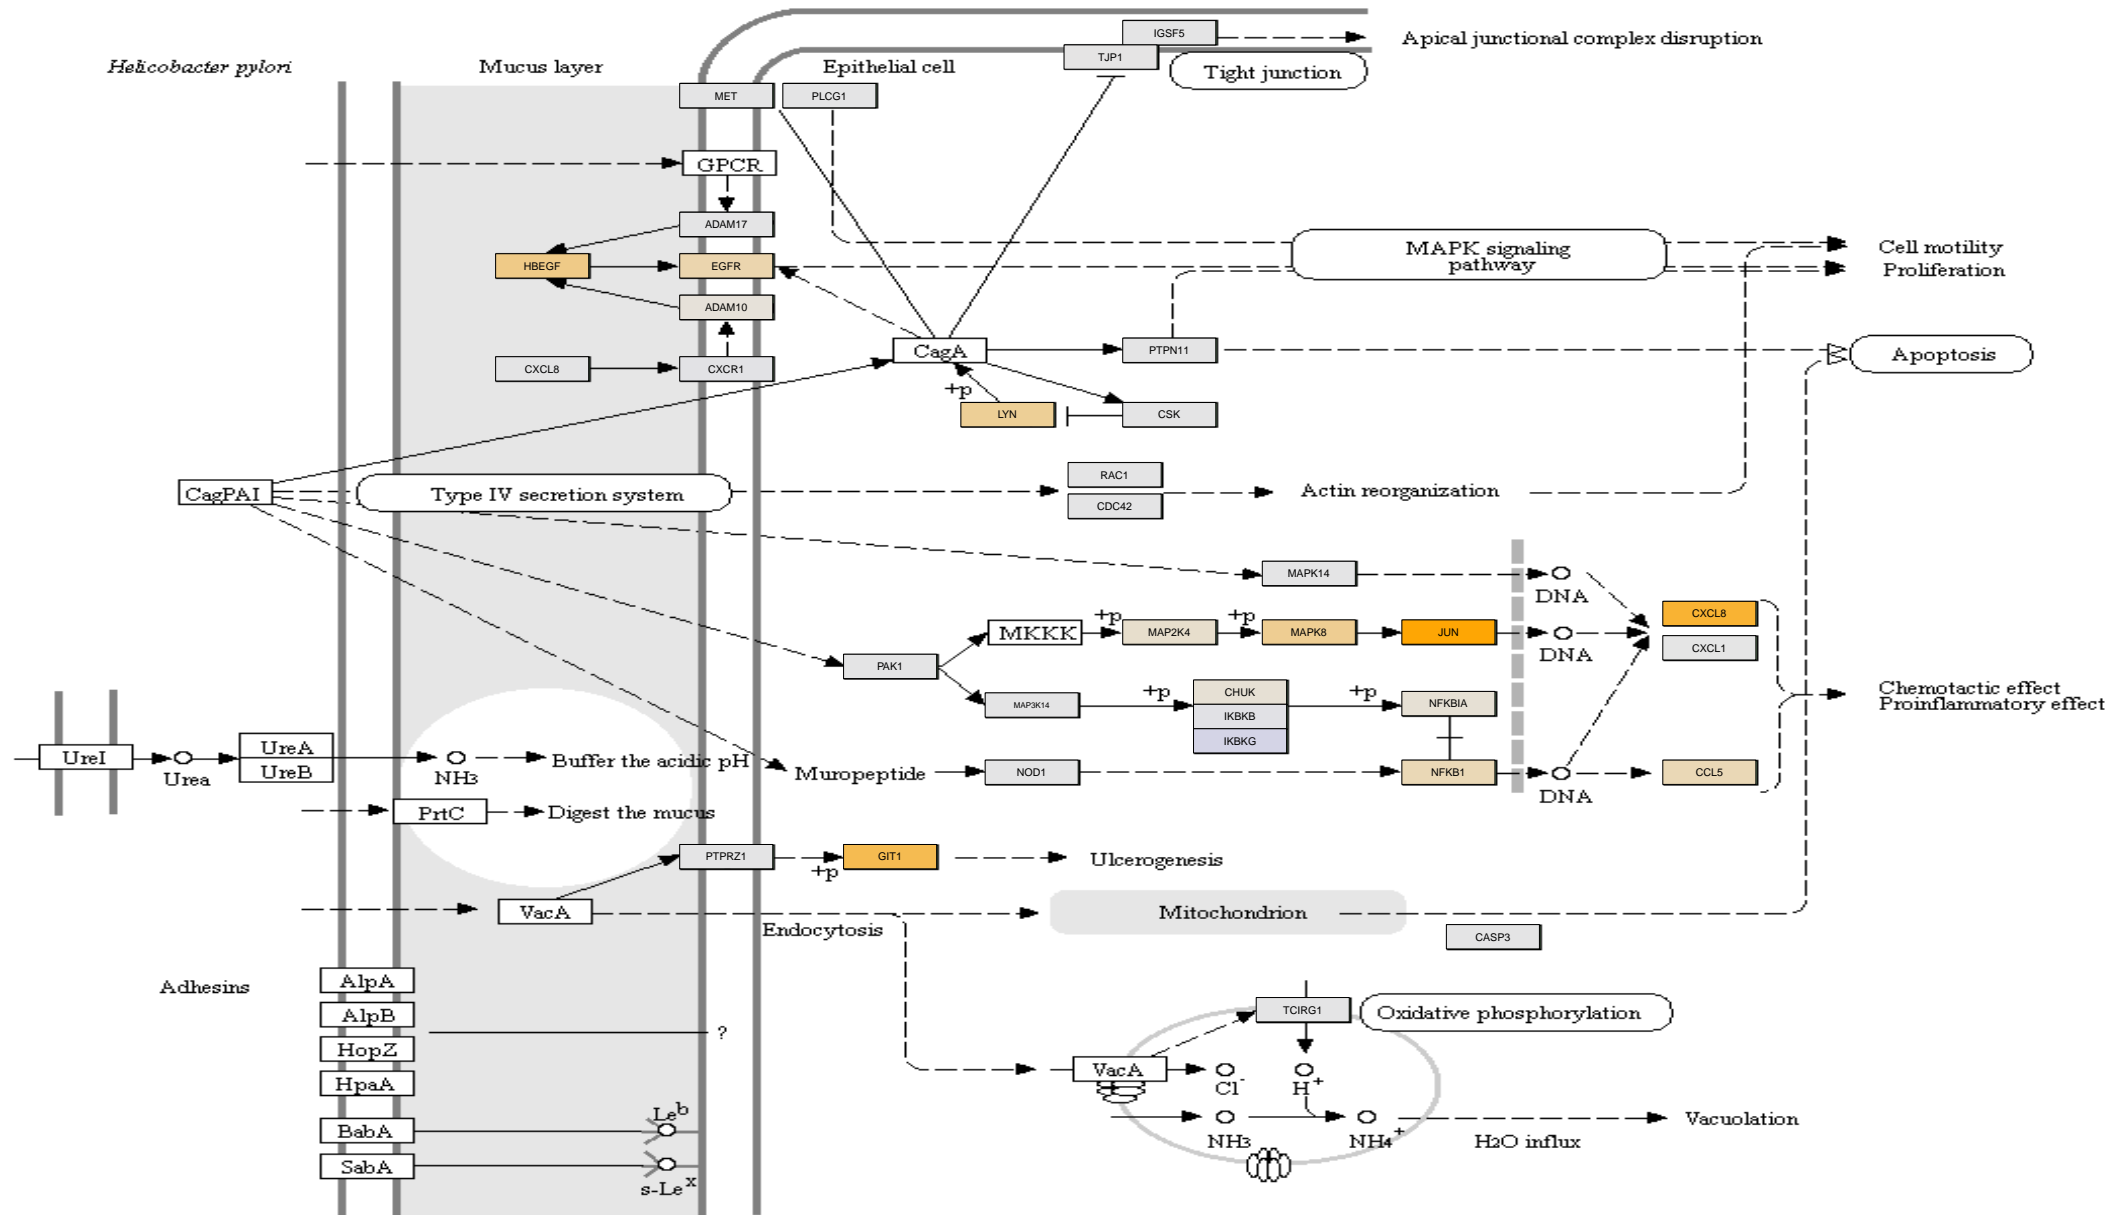

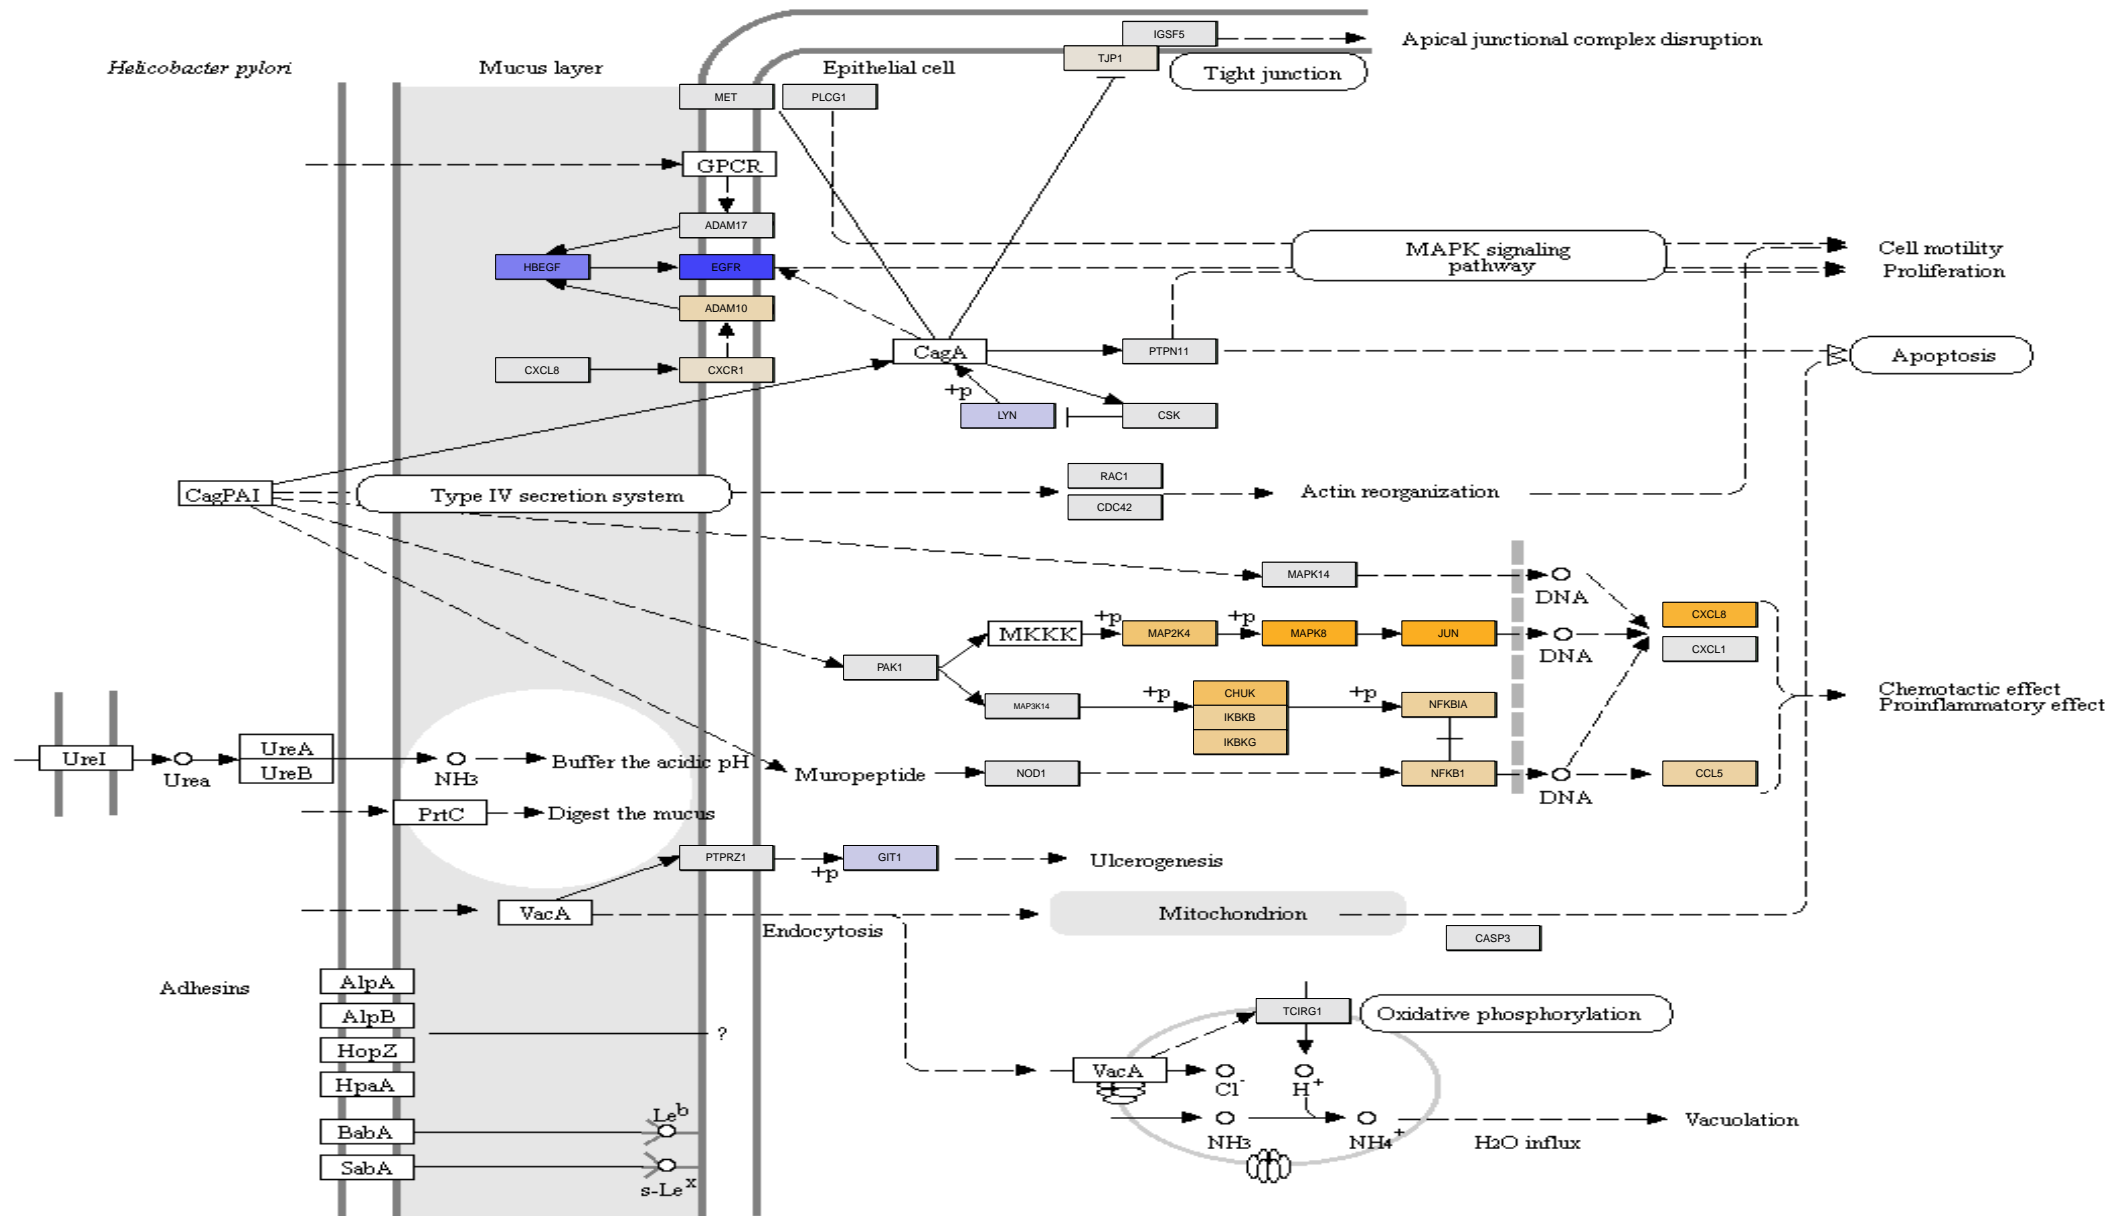

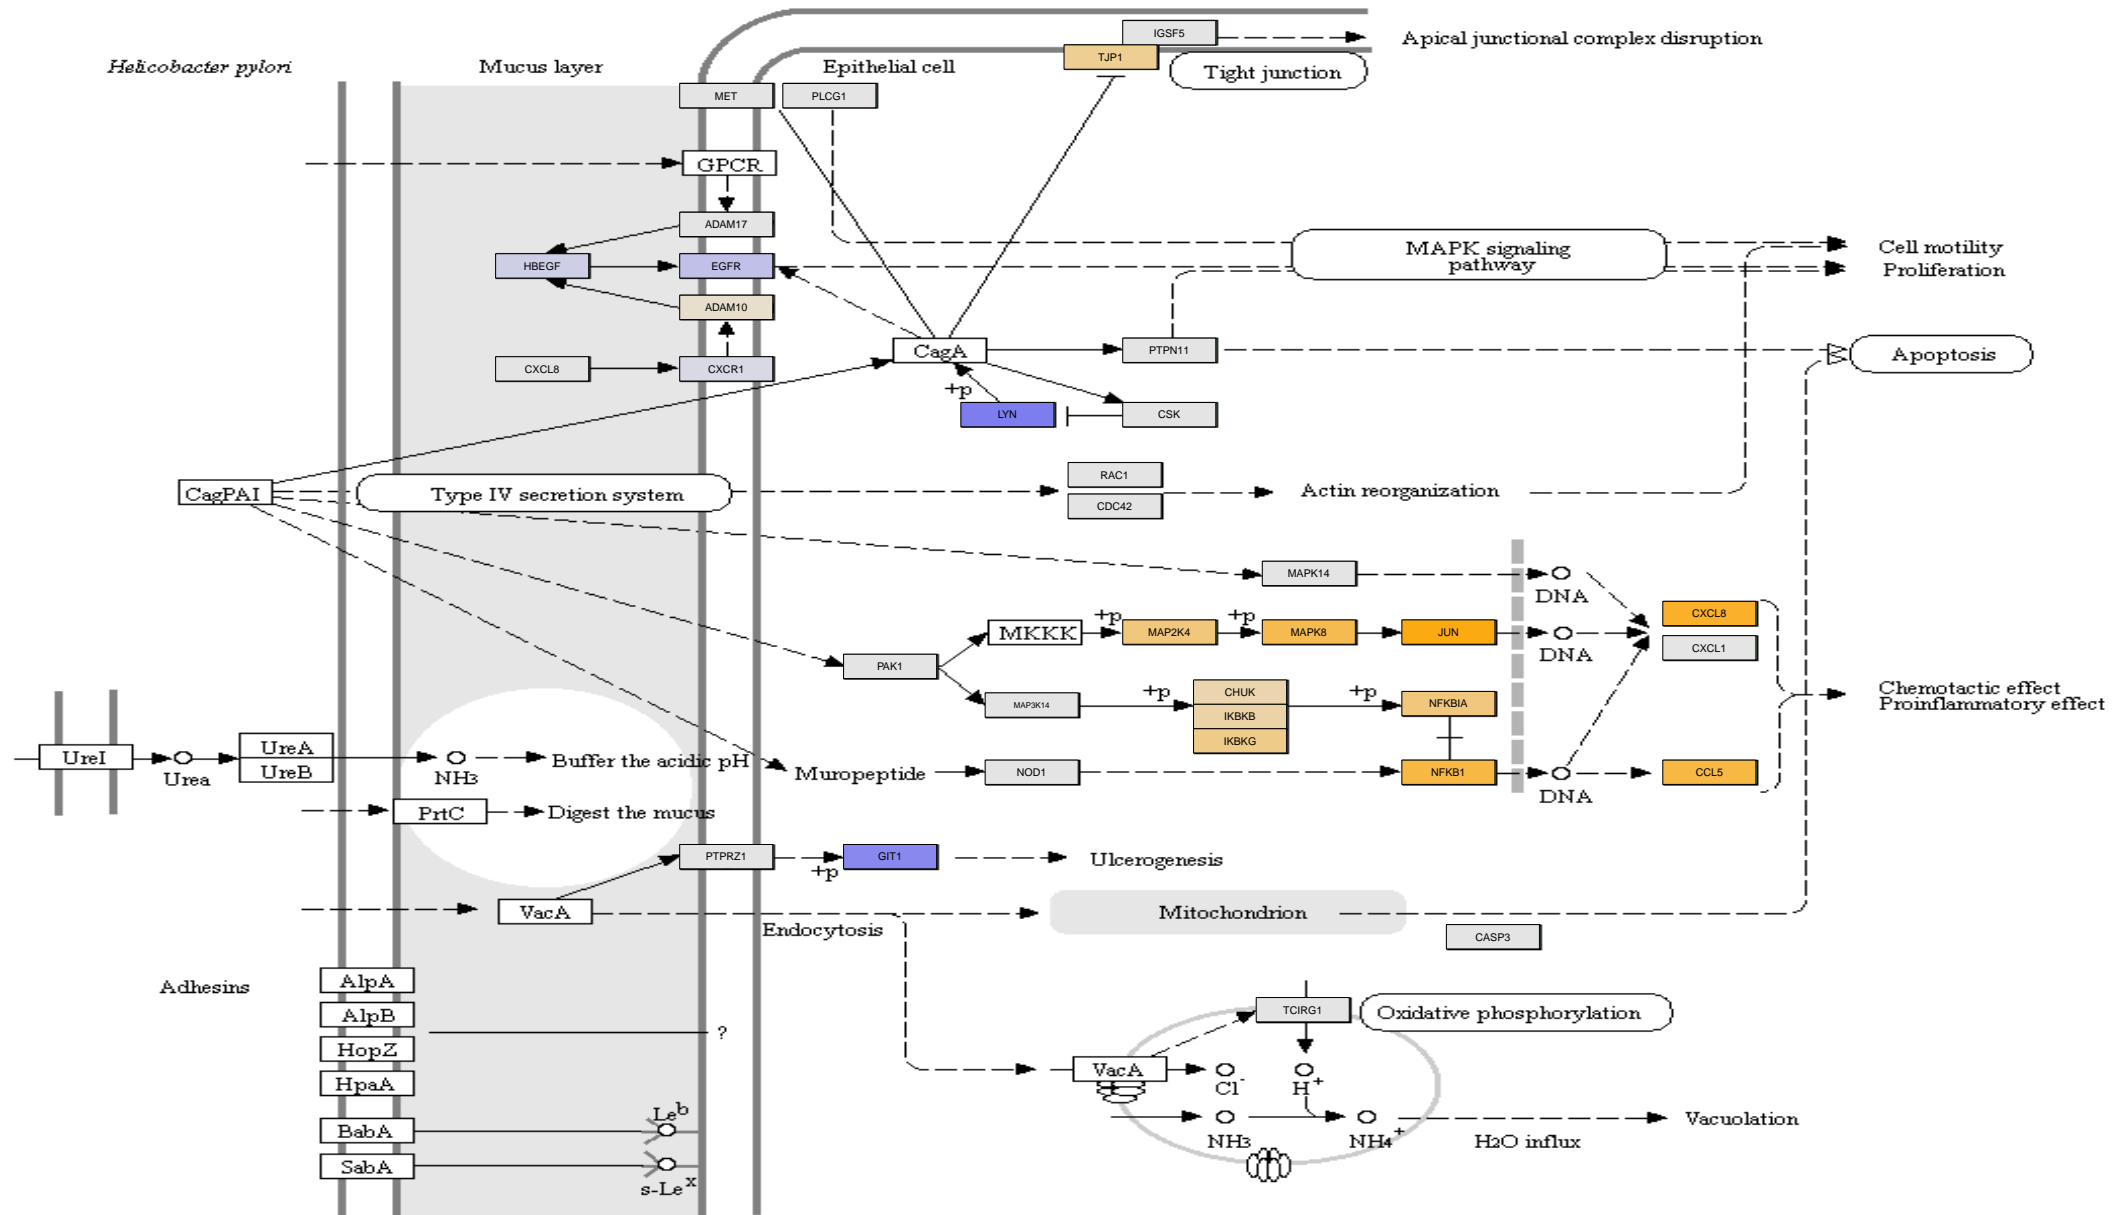



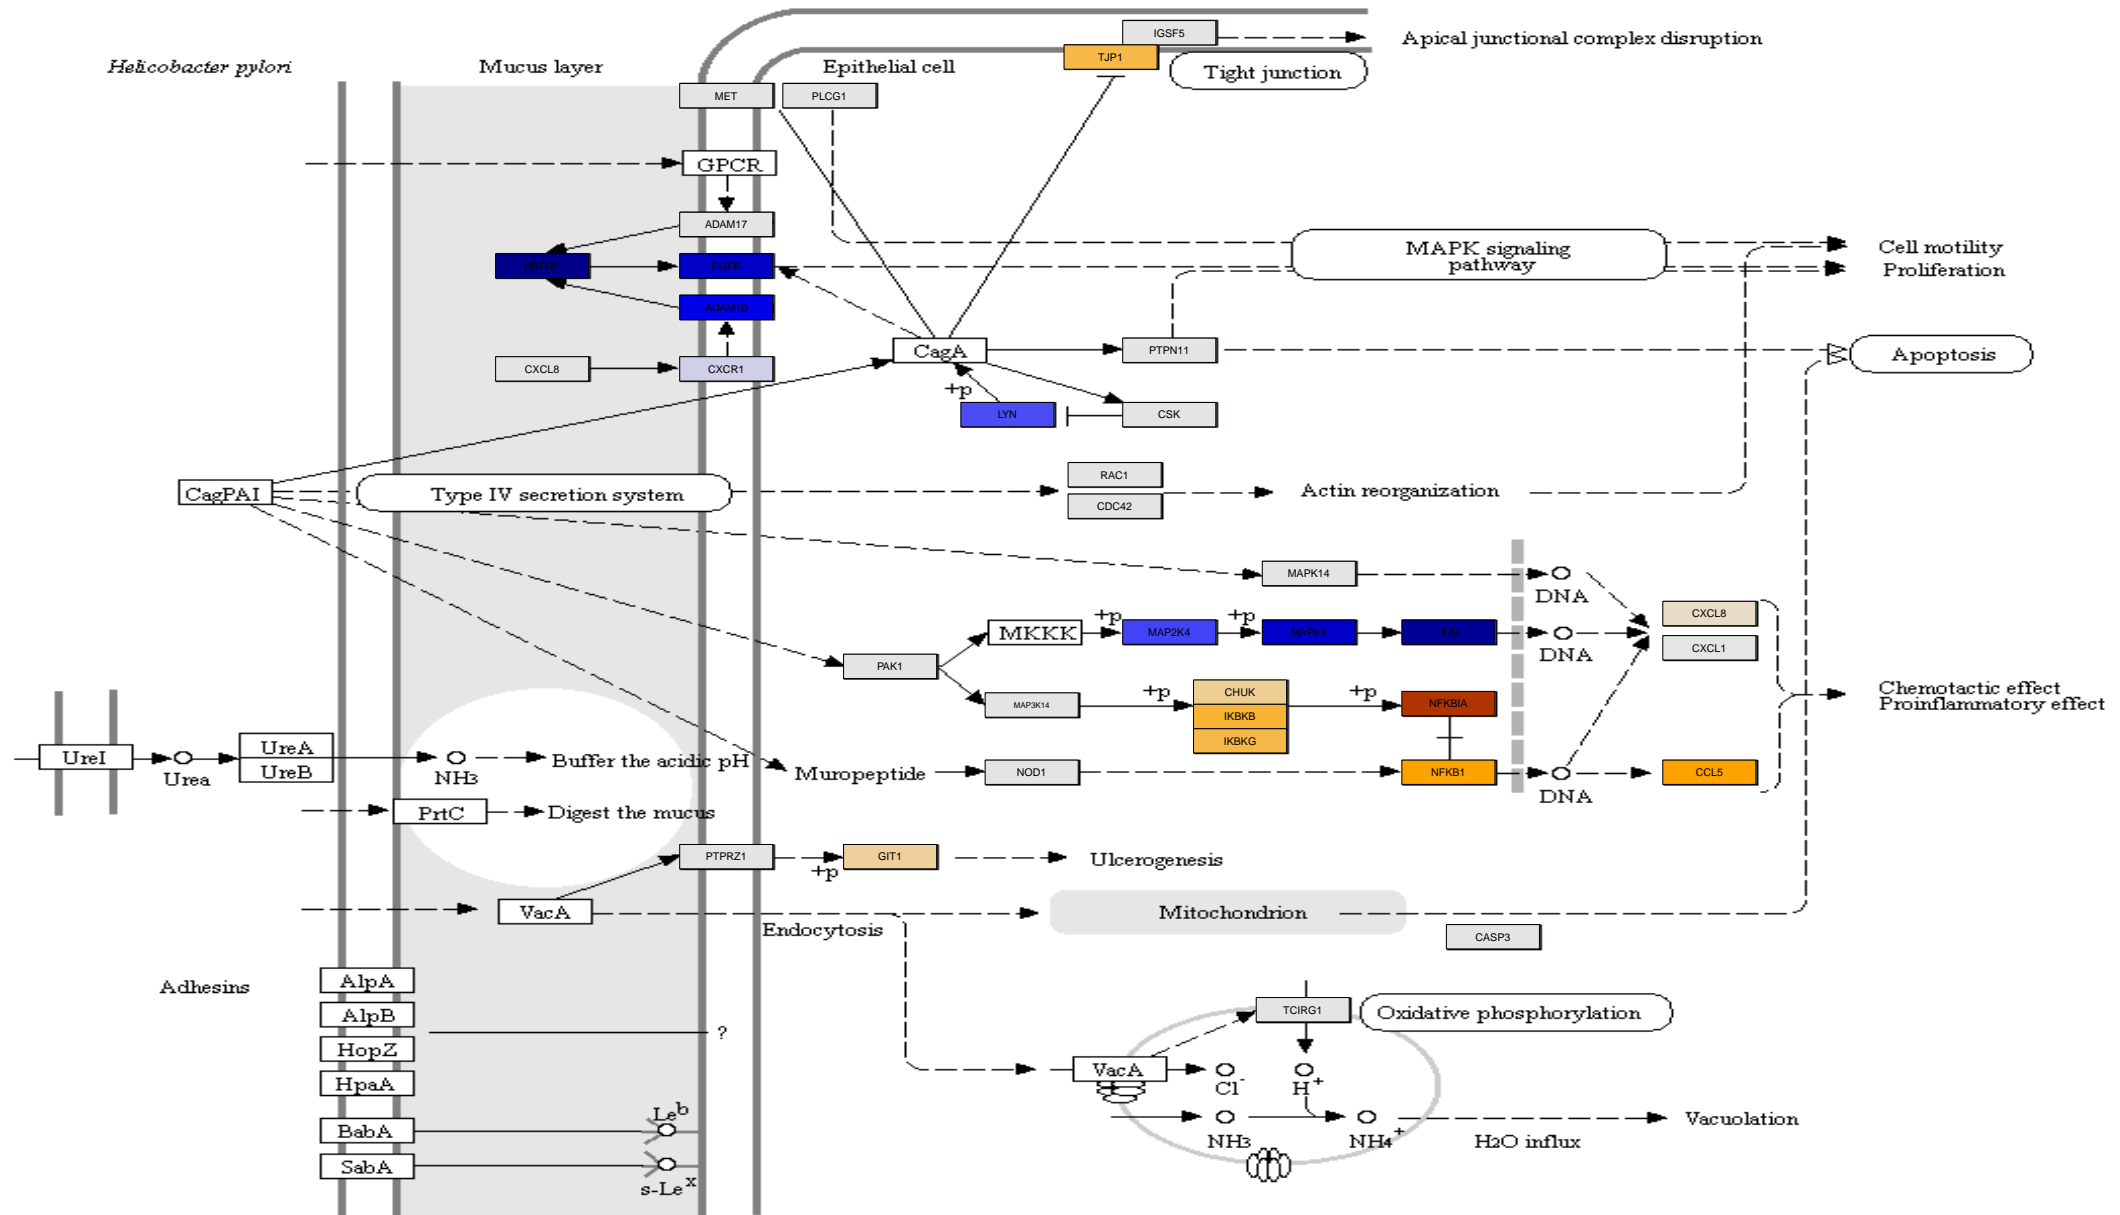

Supplement: s1 [file s1]

Epithelial cell signaling in Helicobact

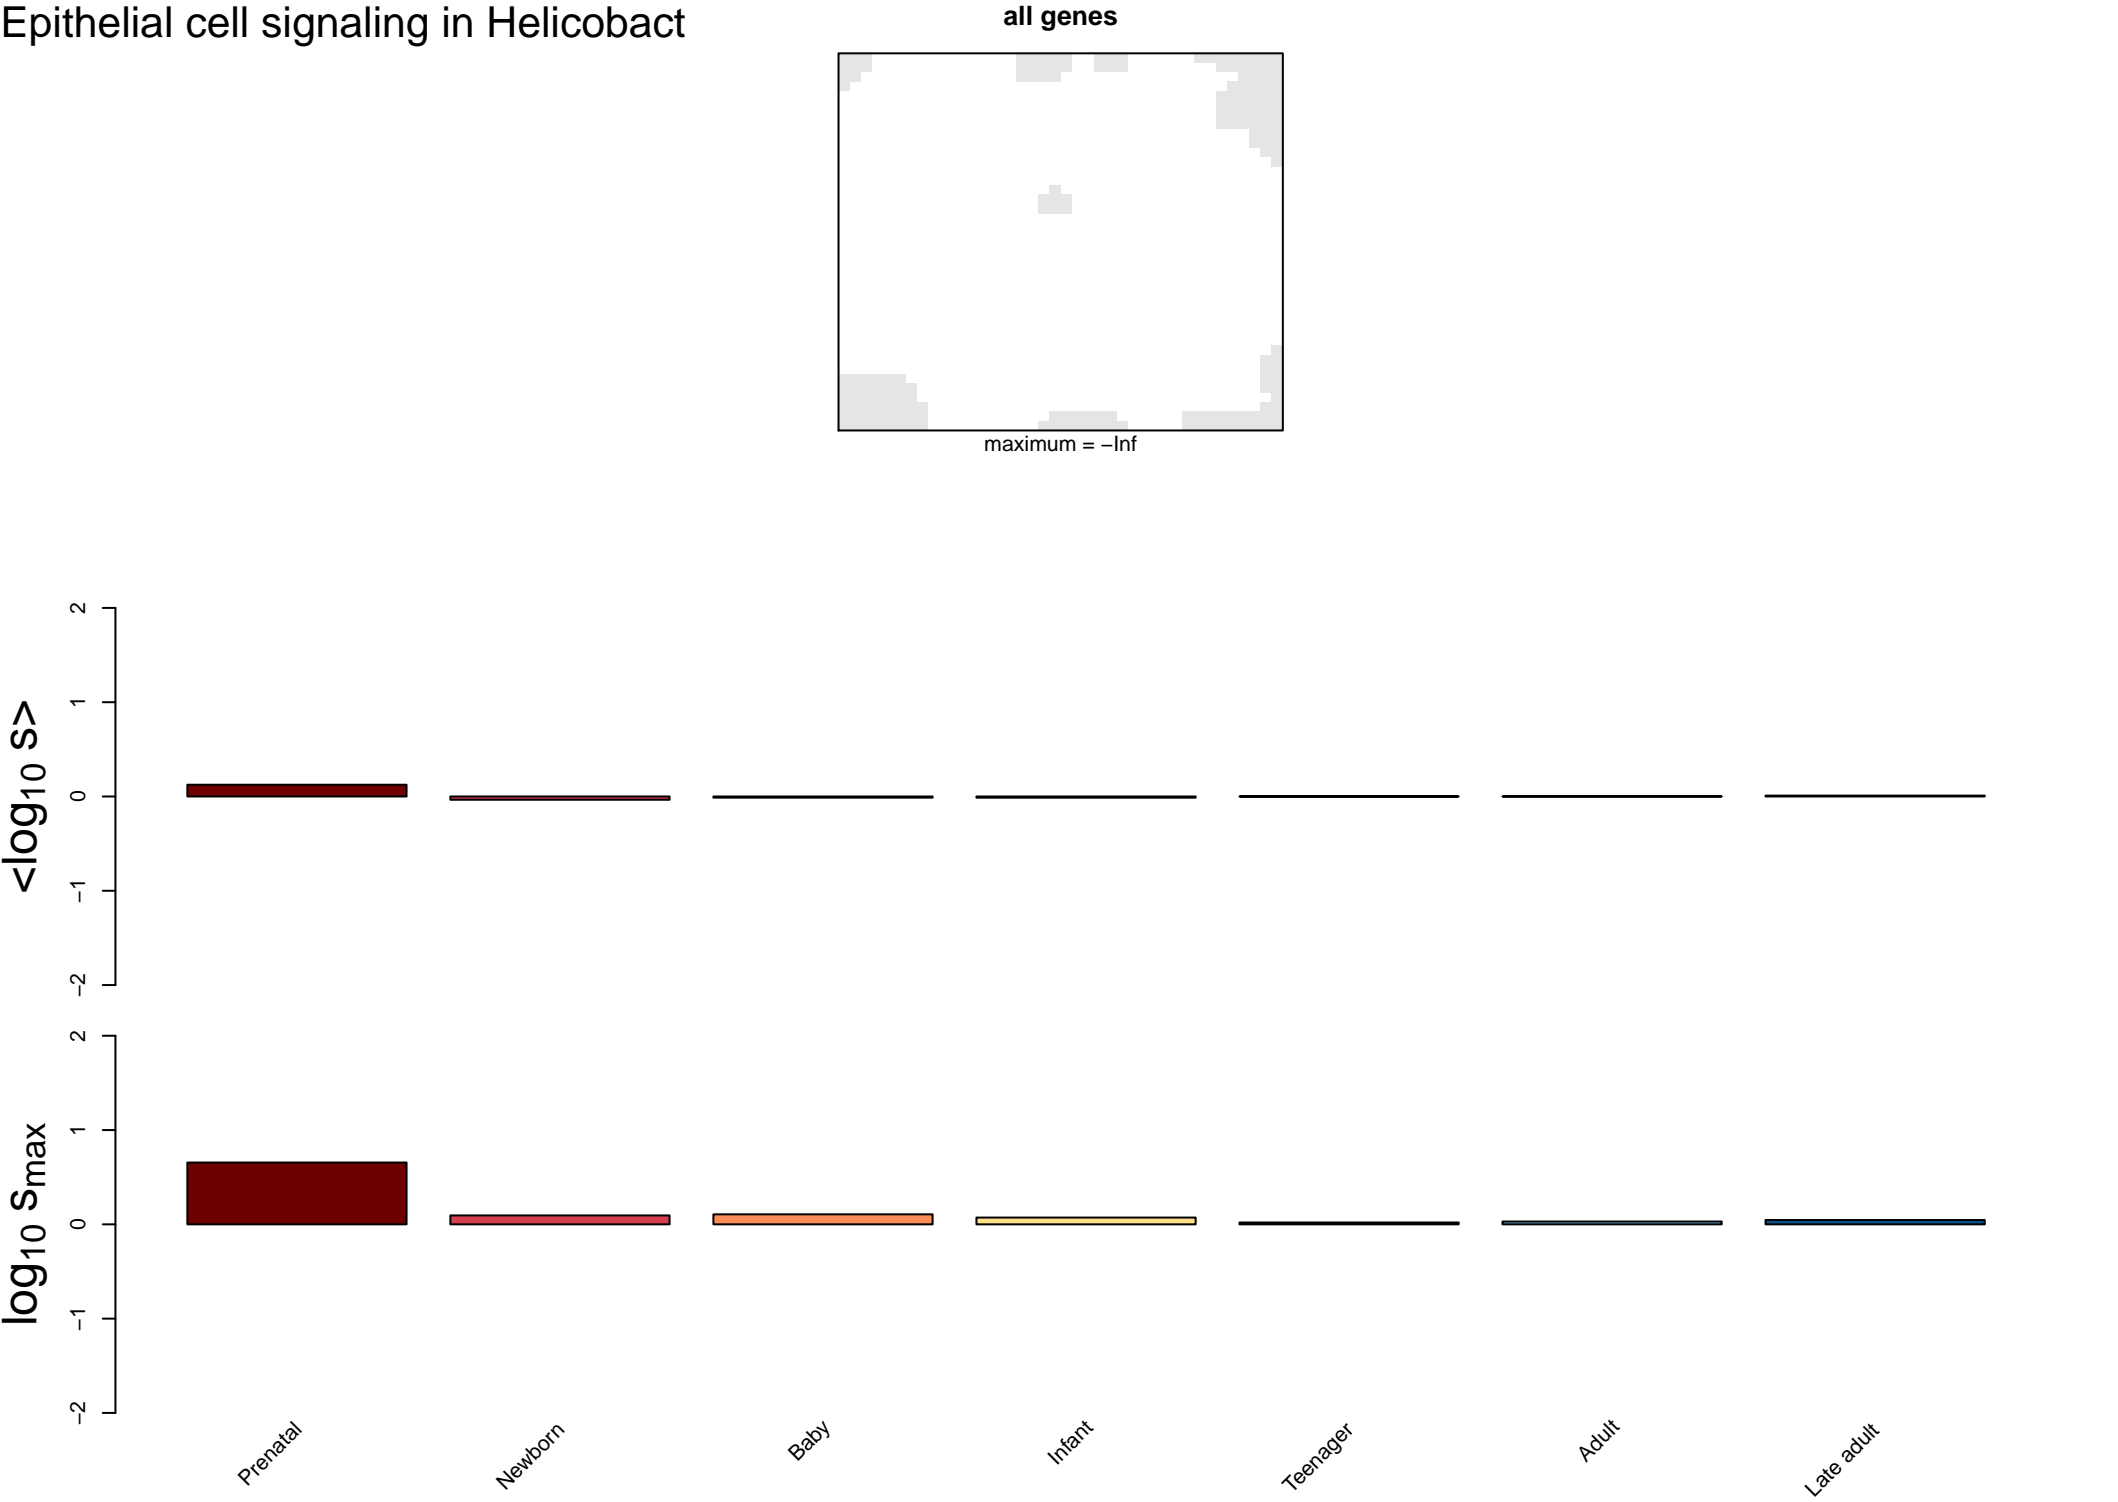

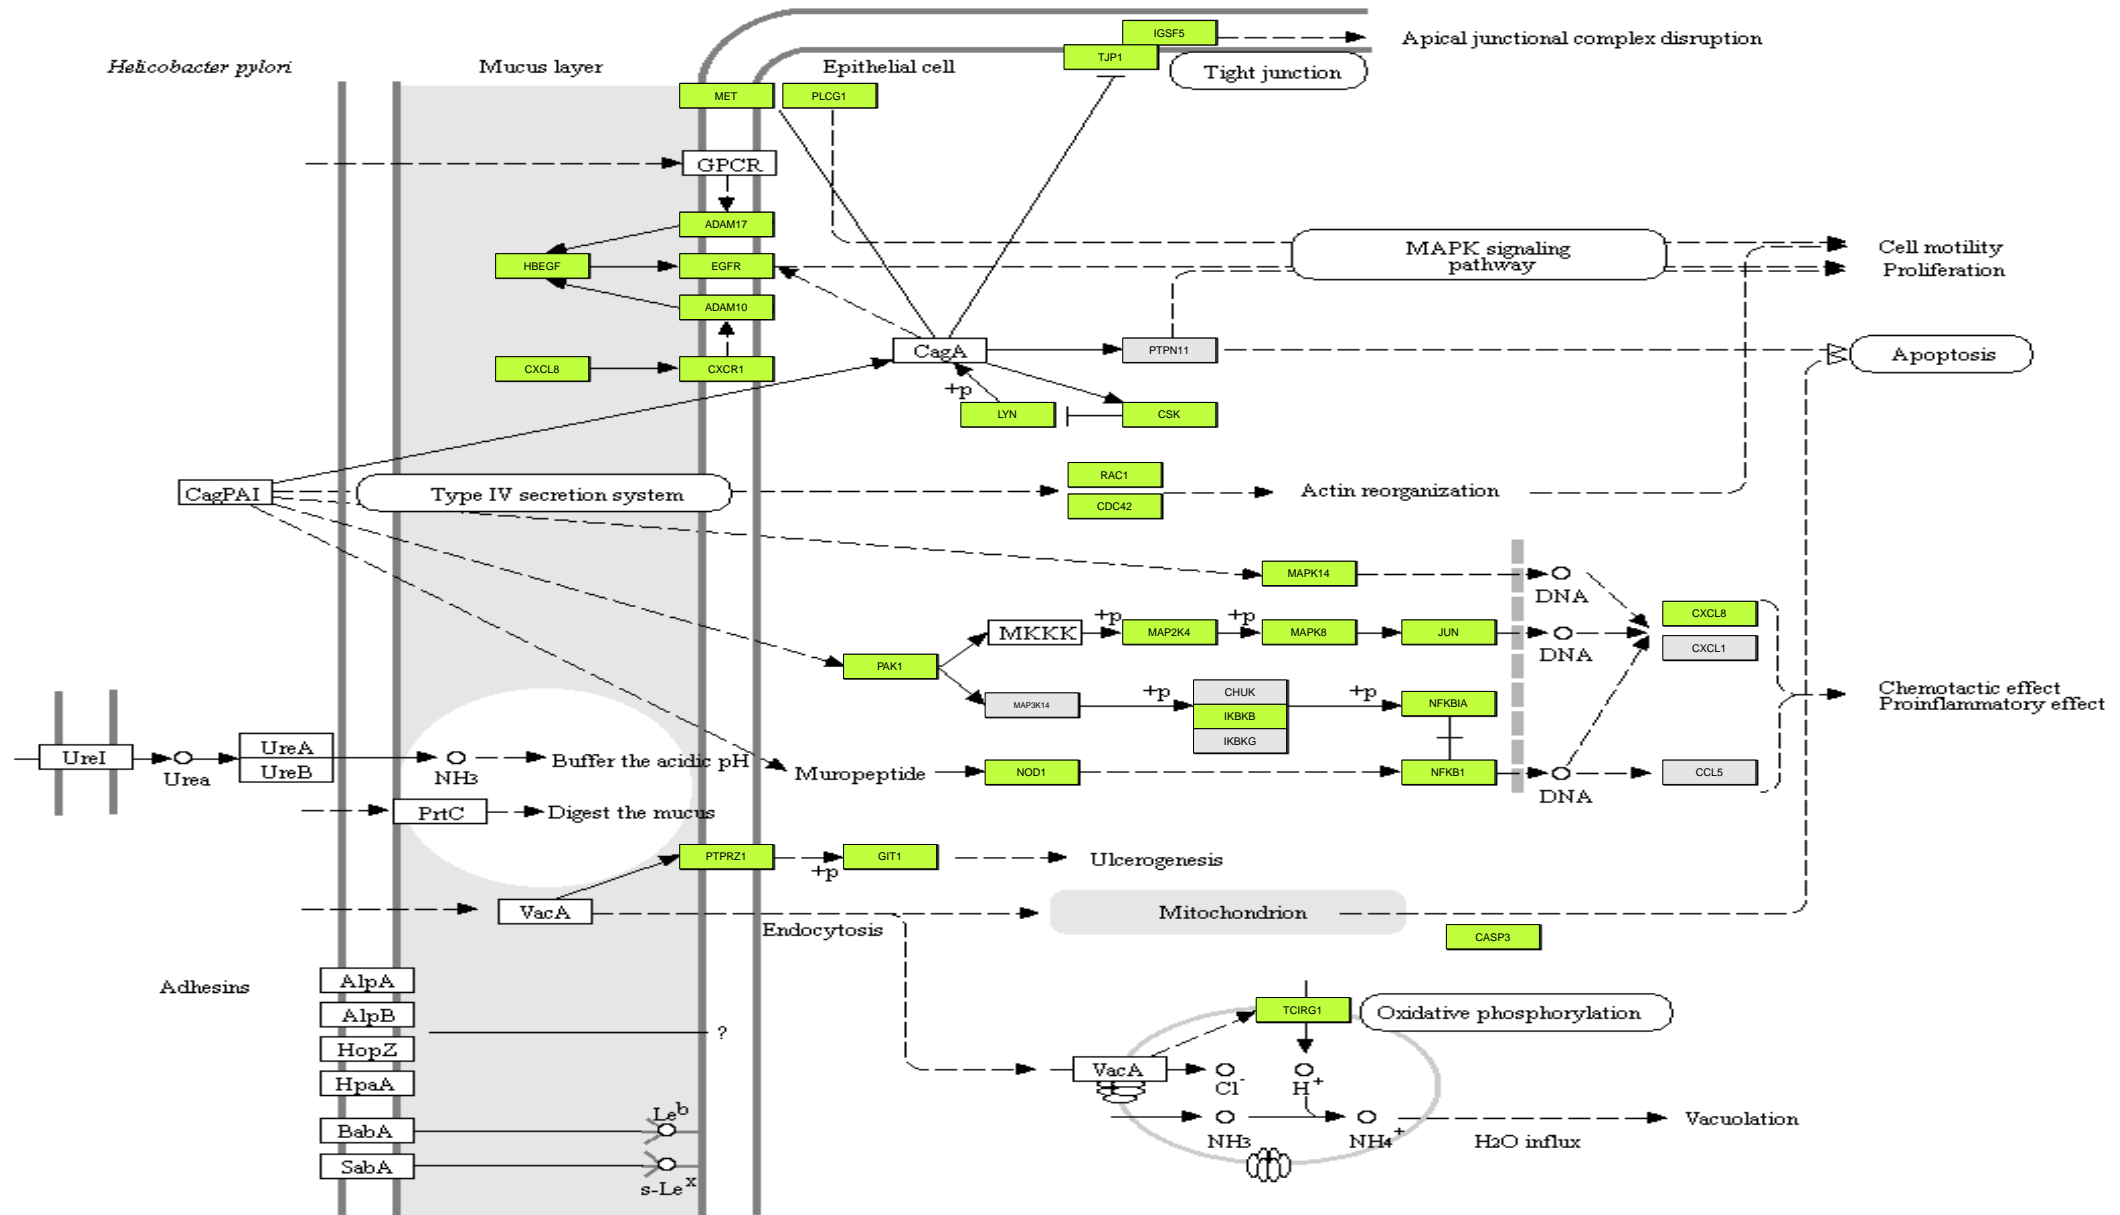



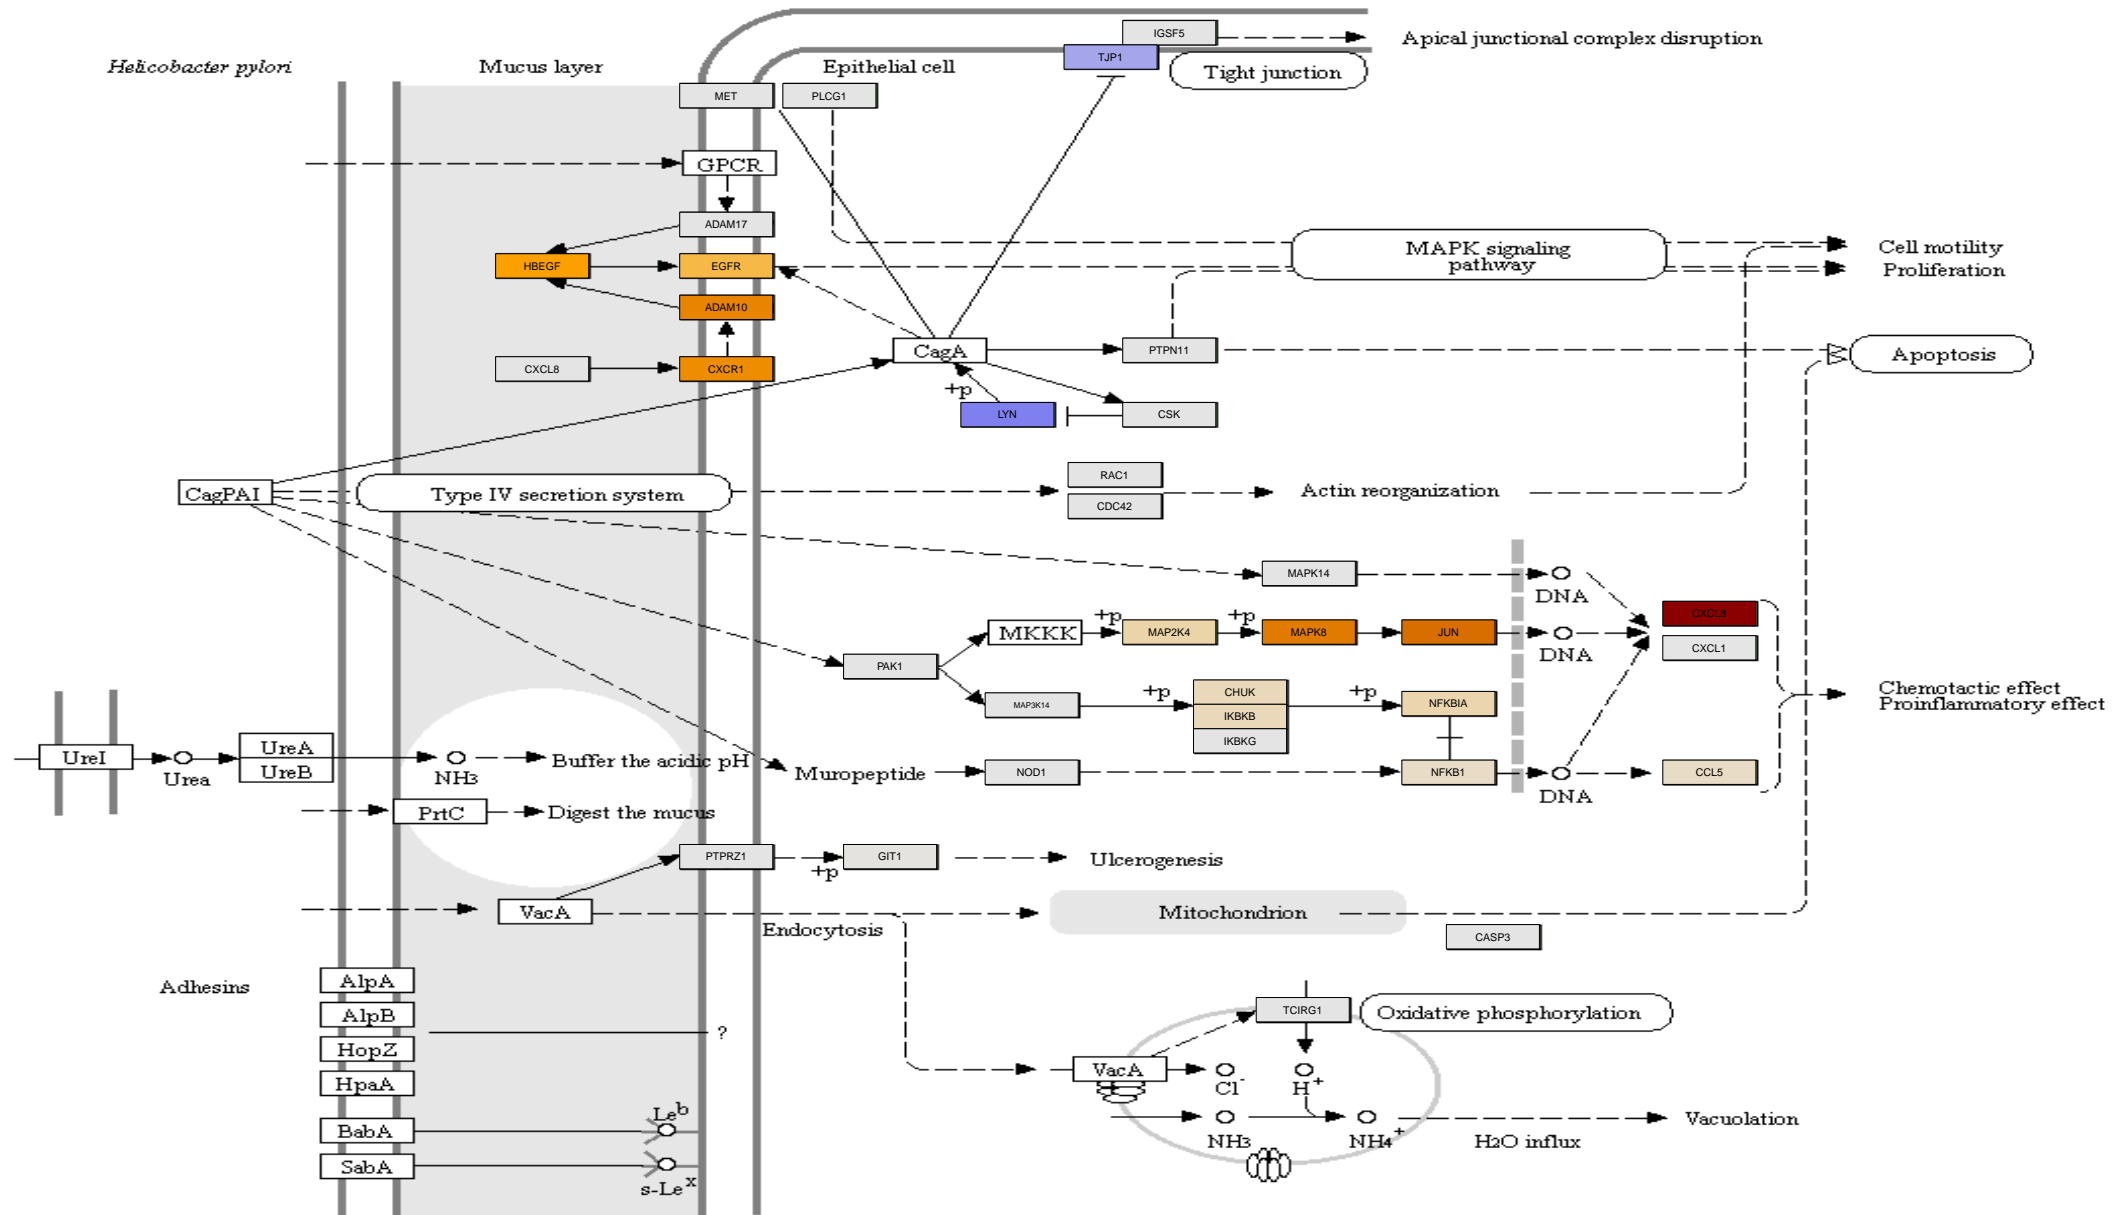

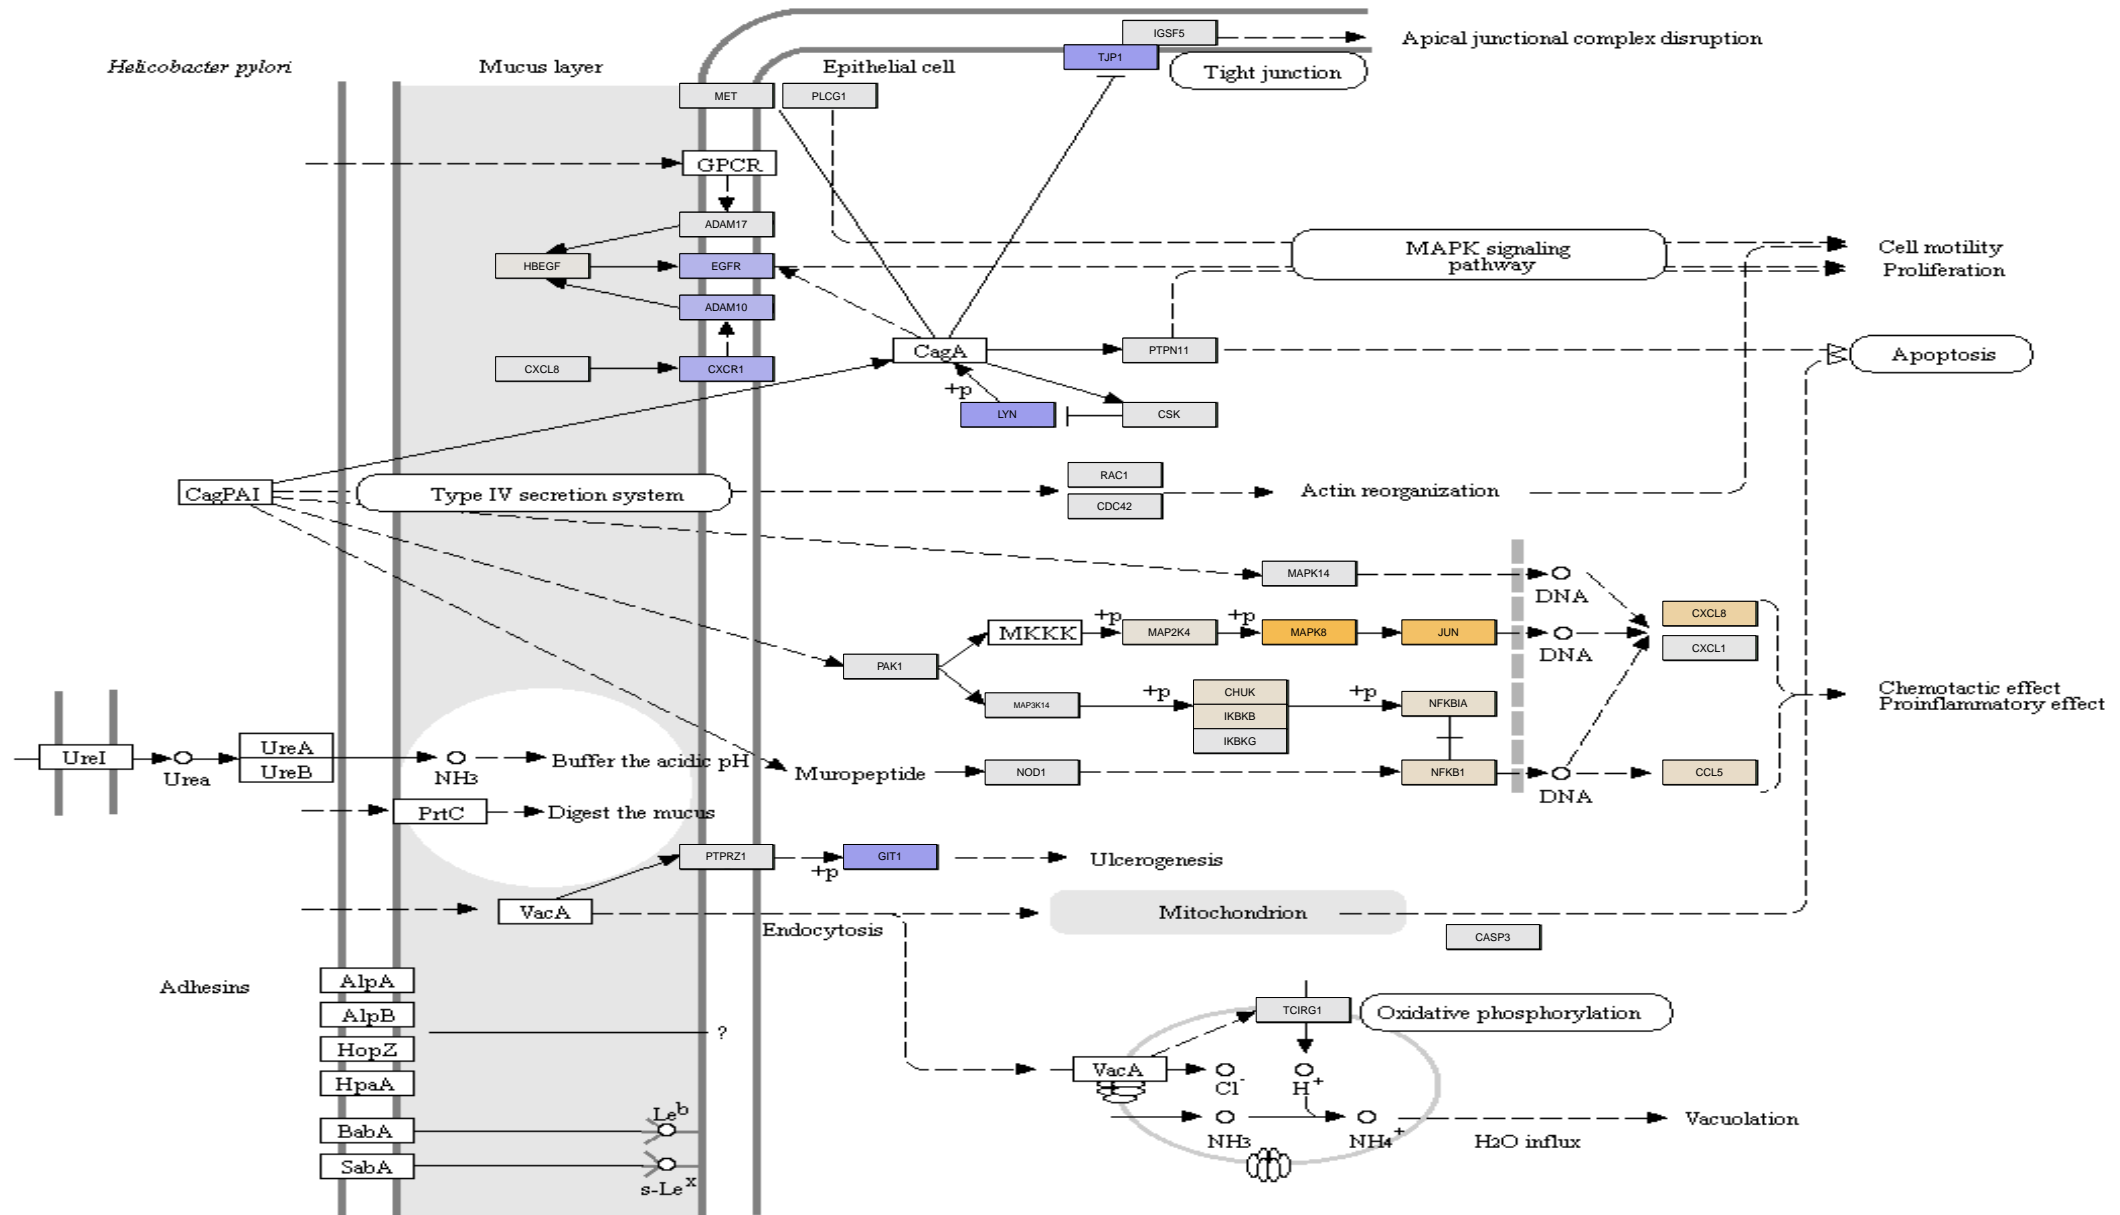

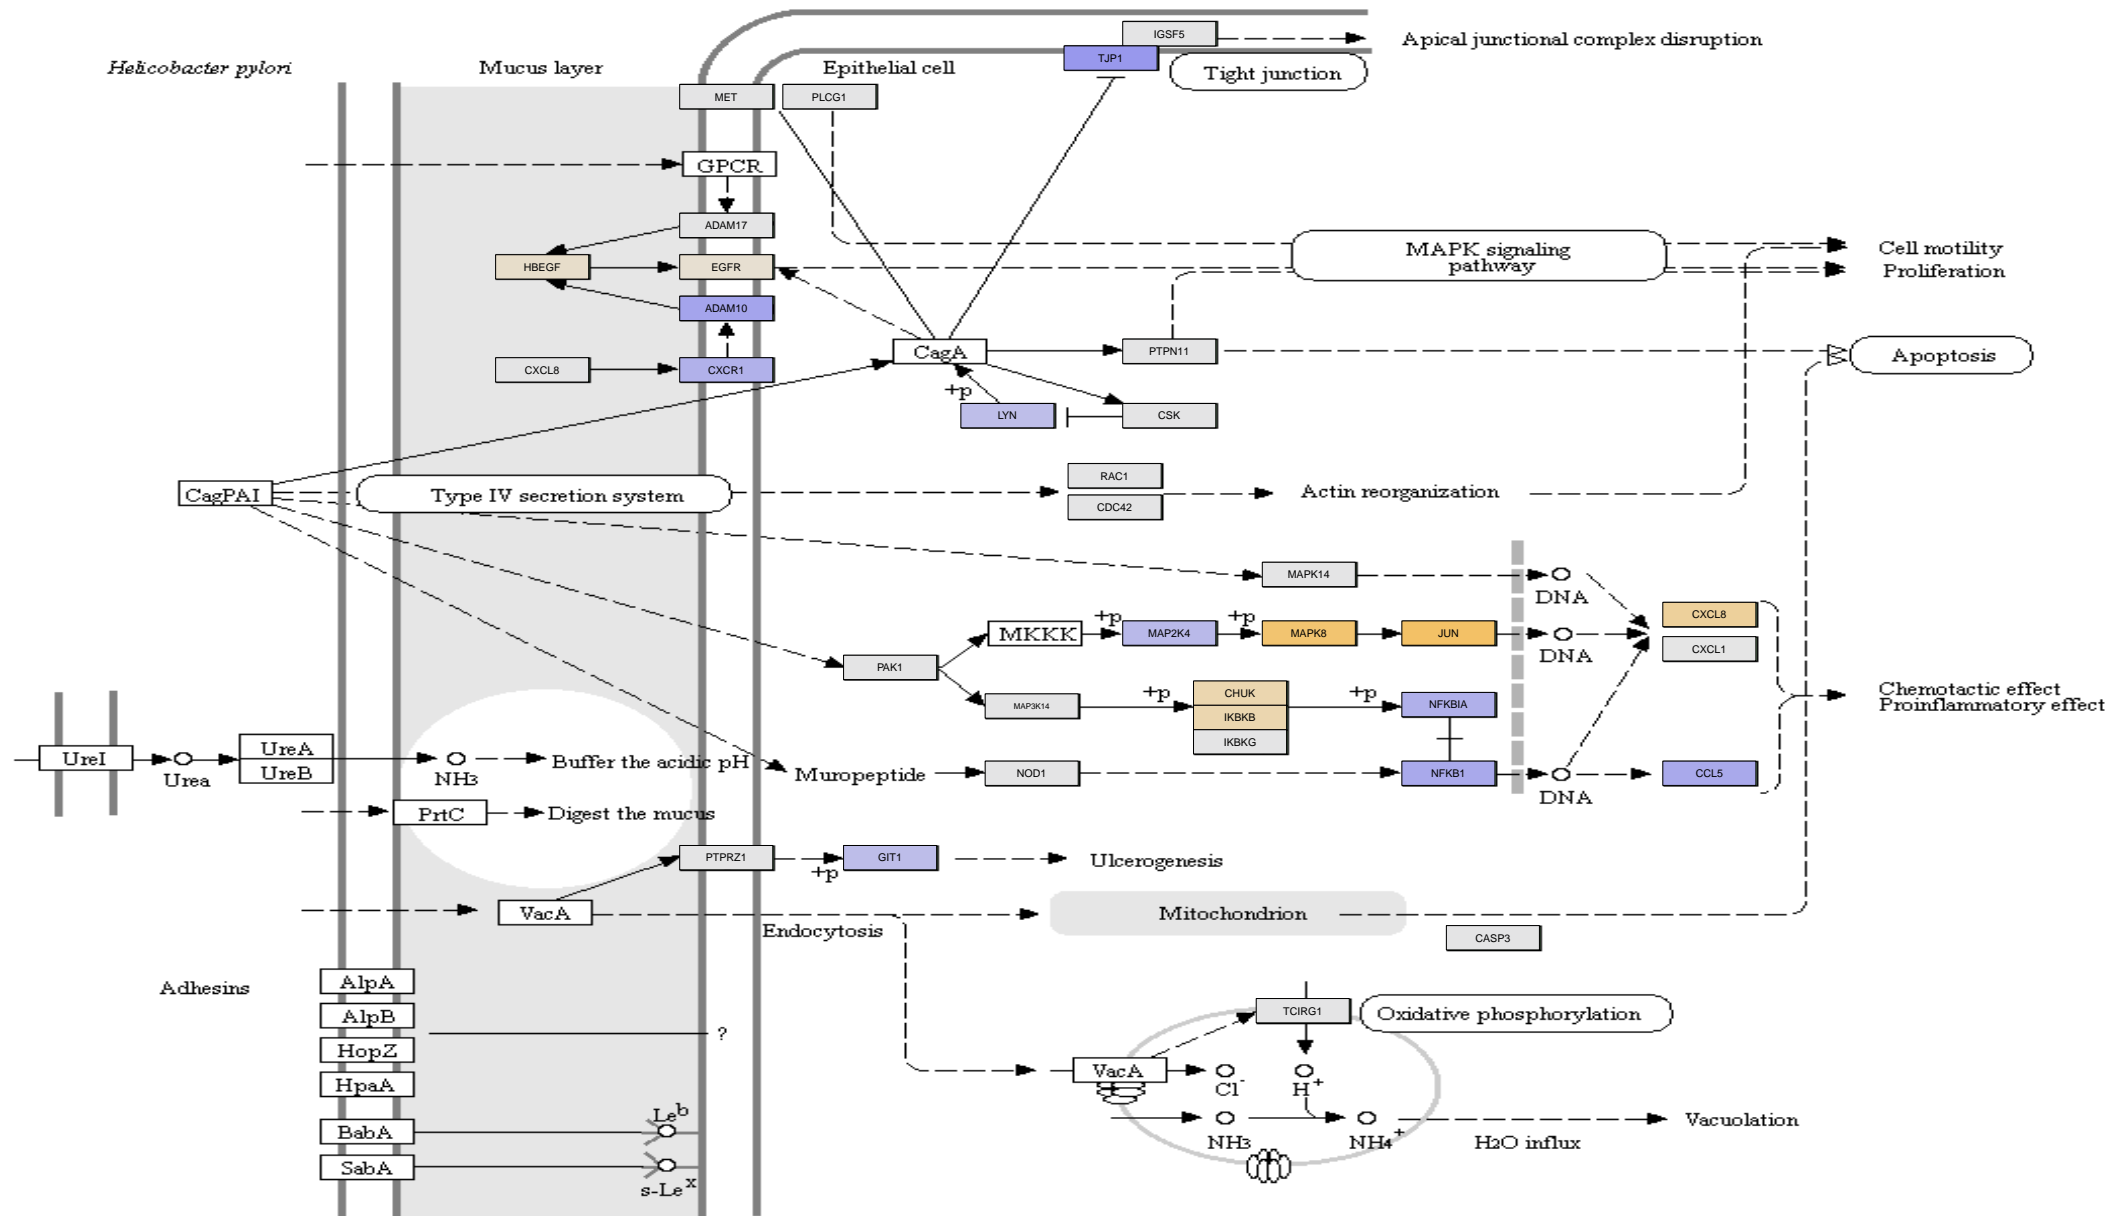

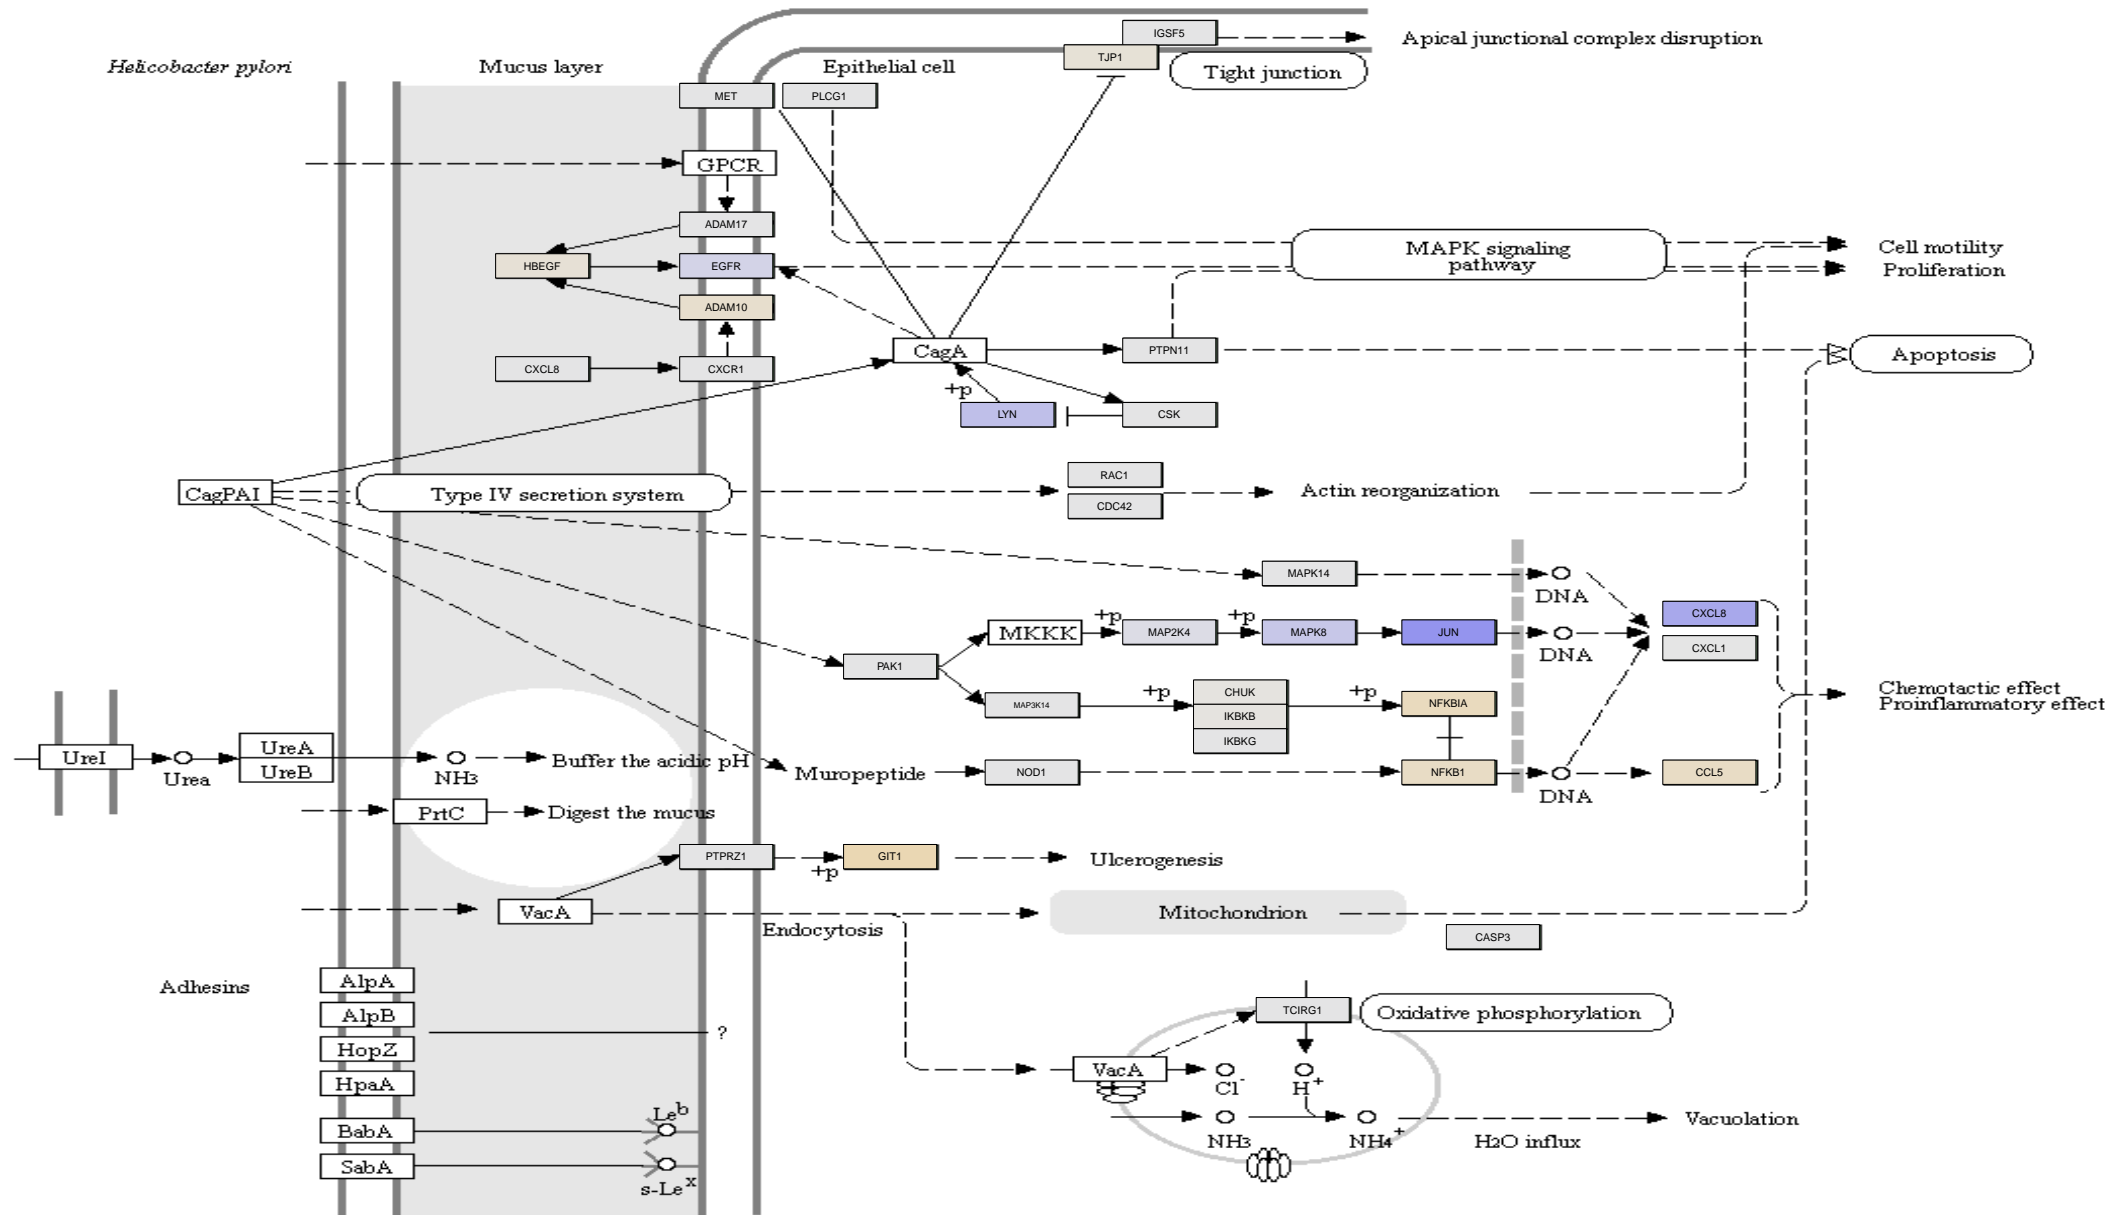

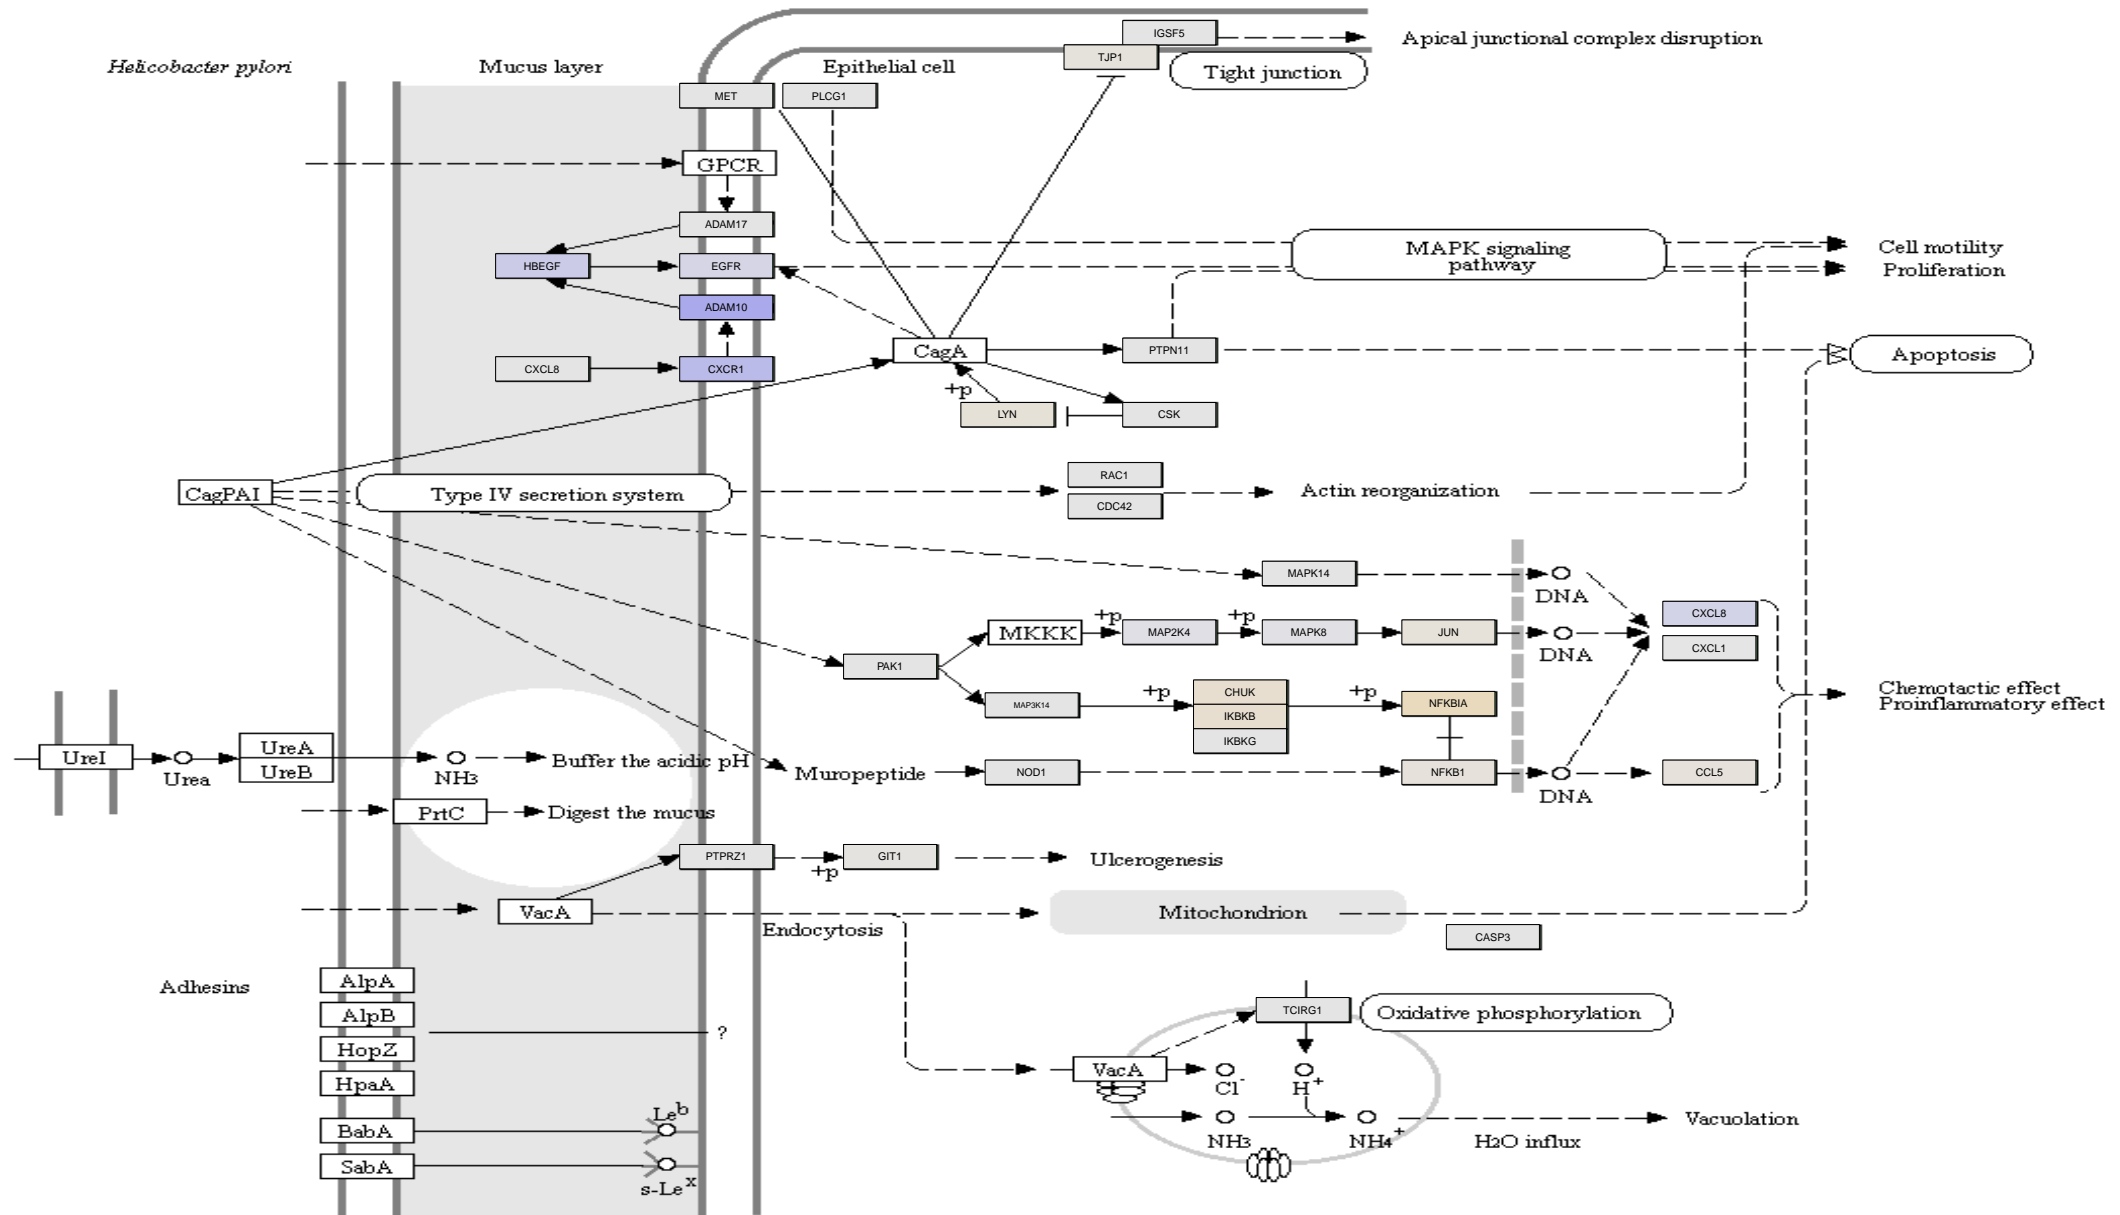



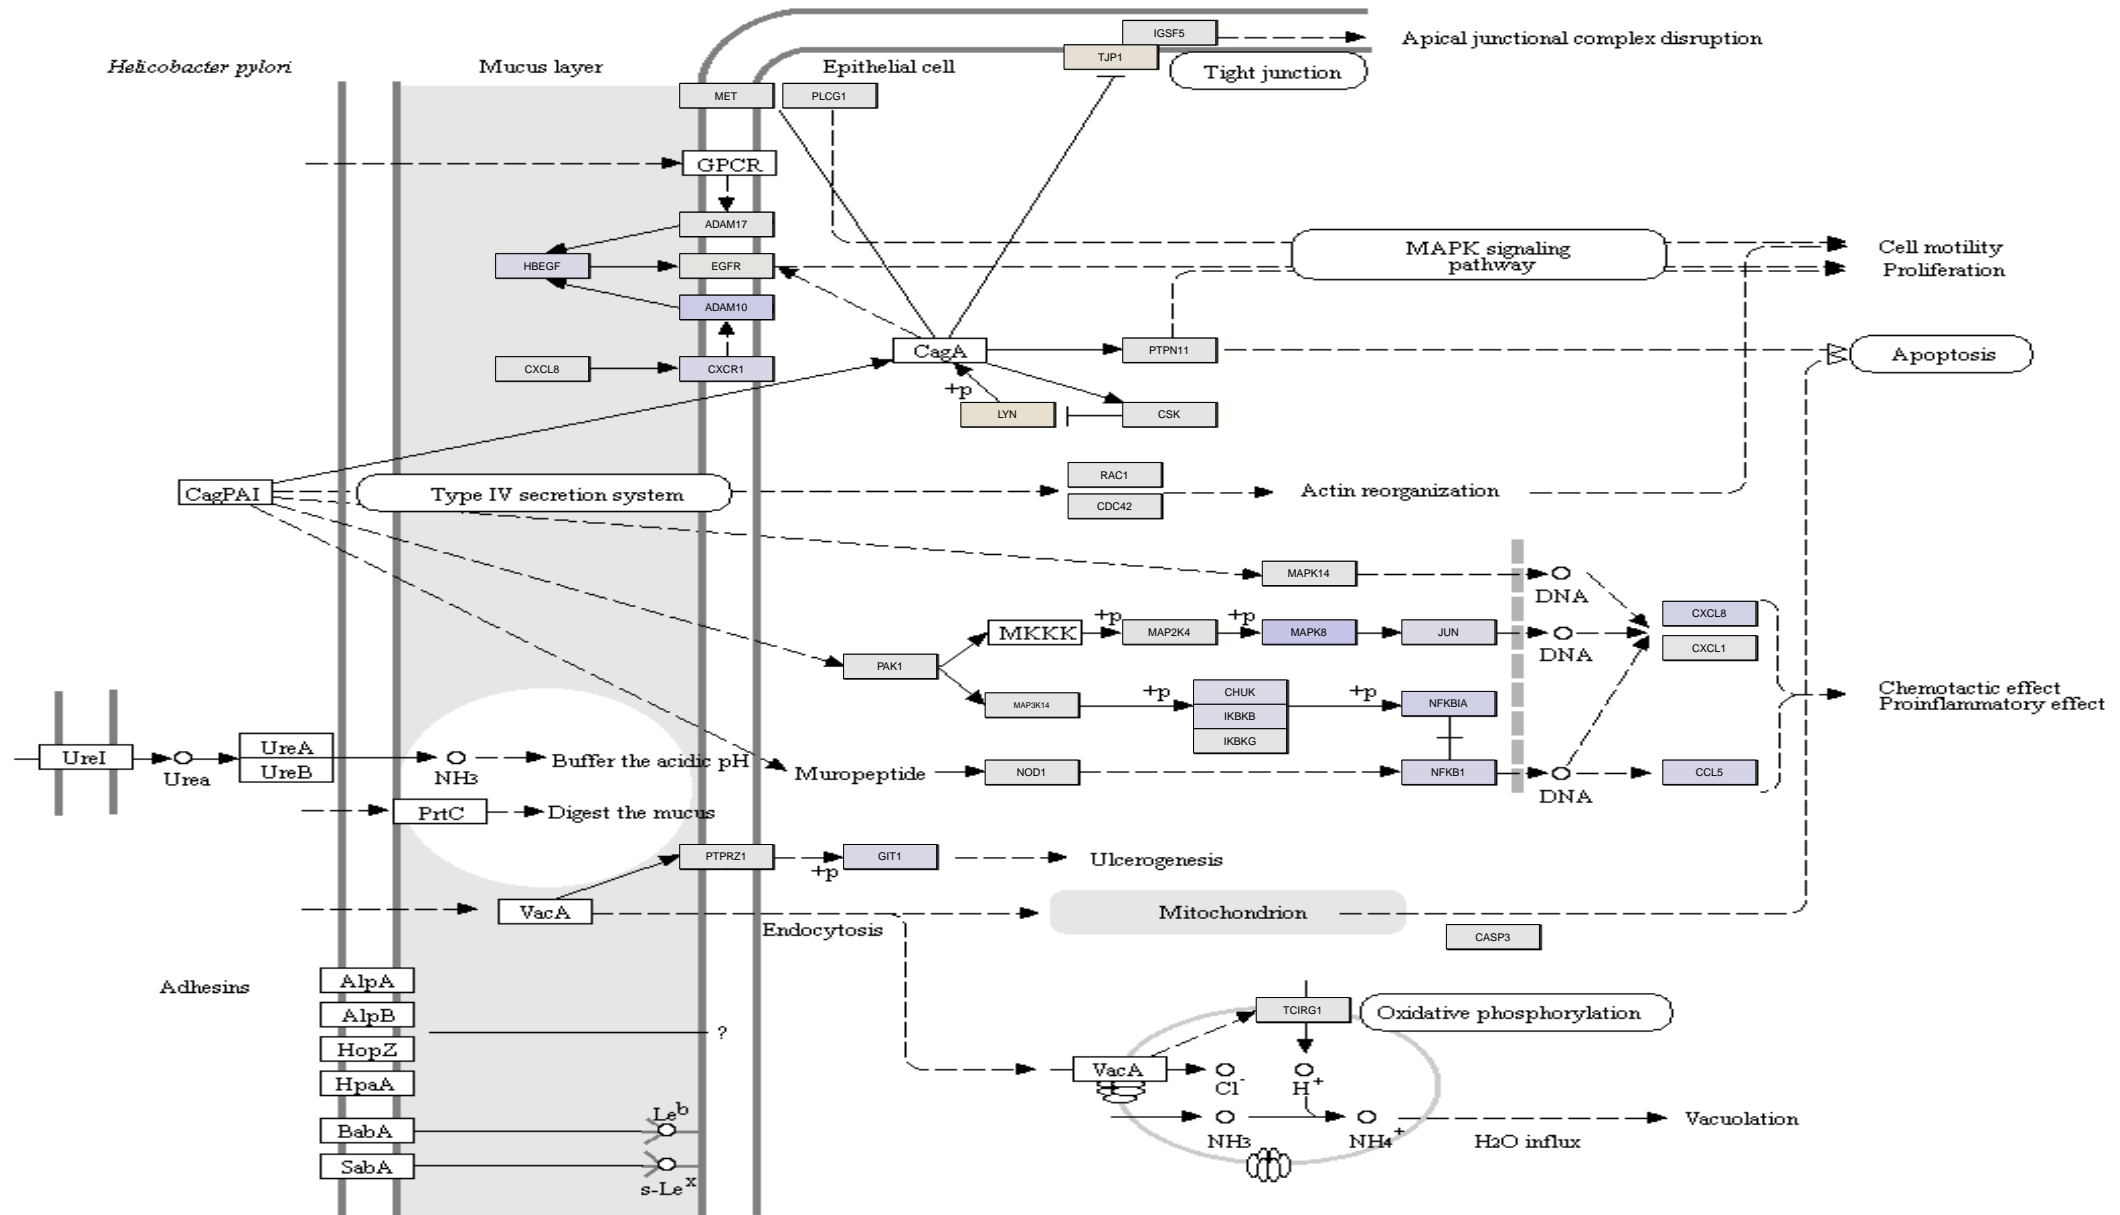

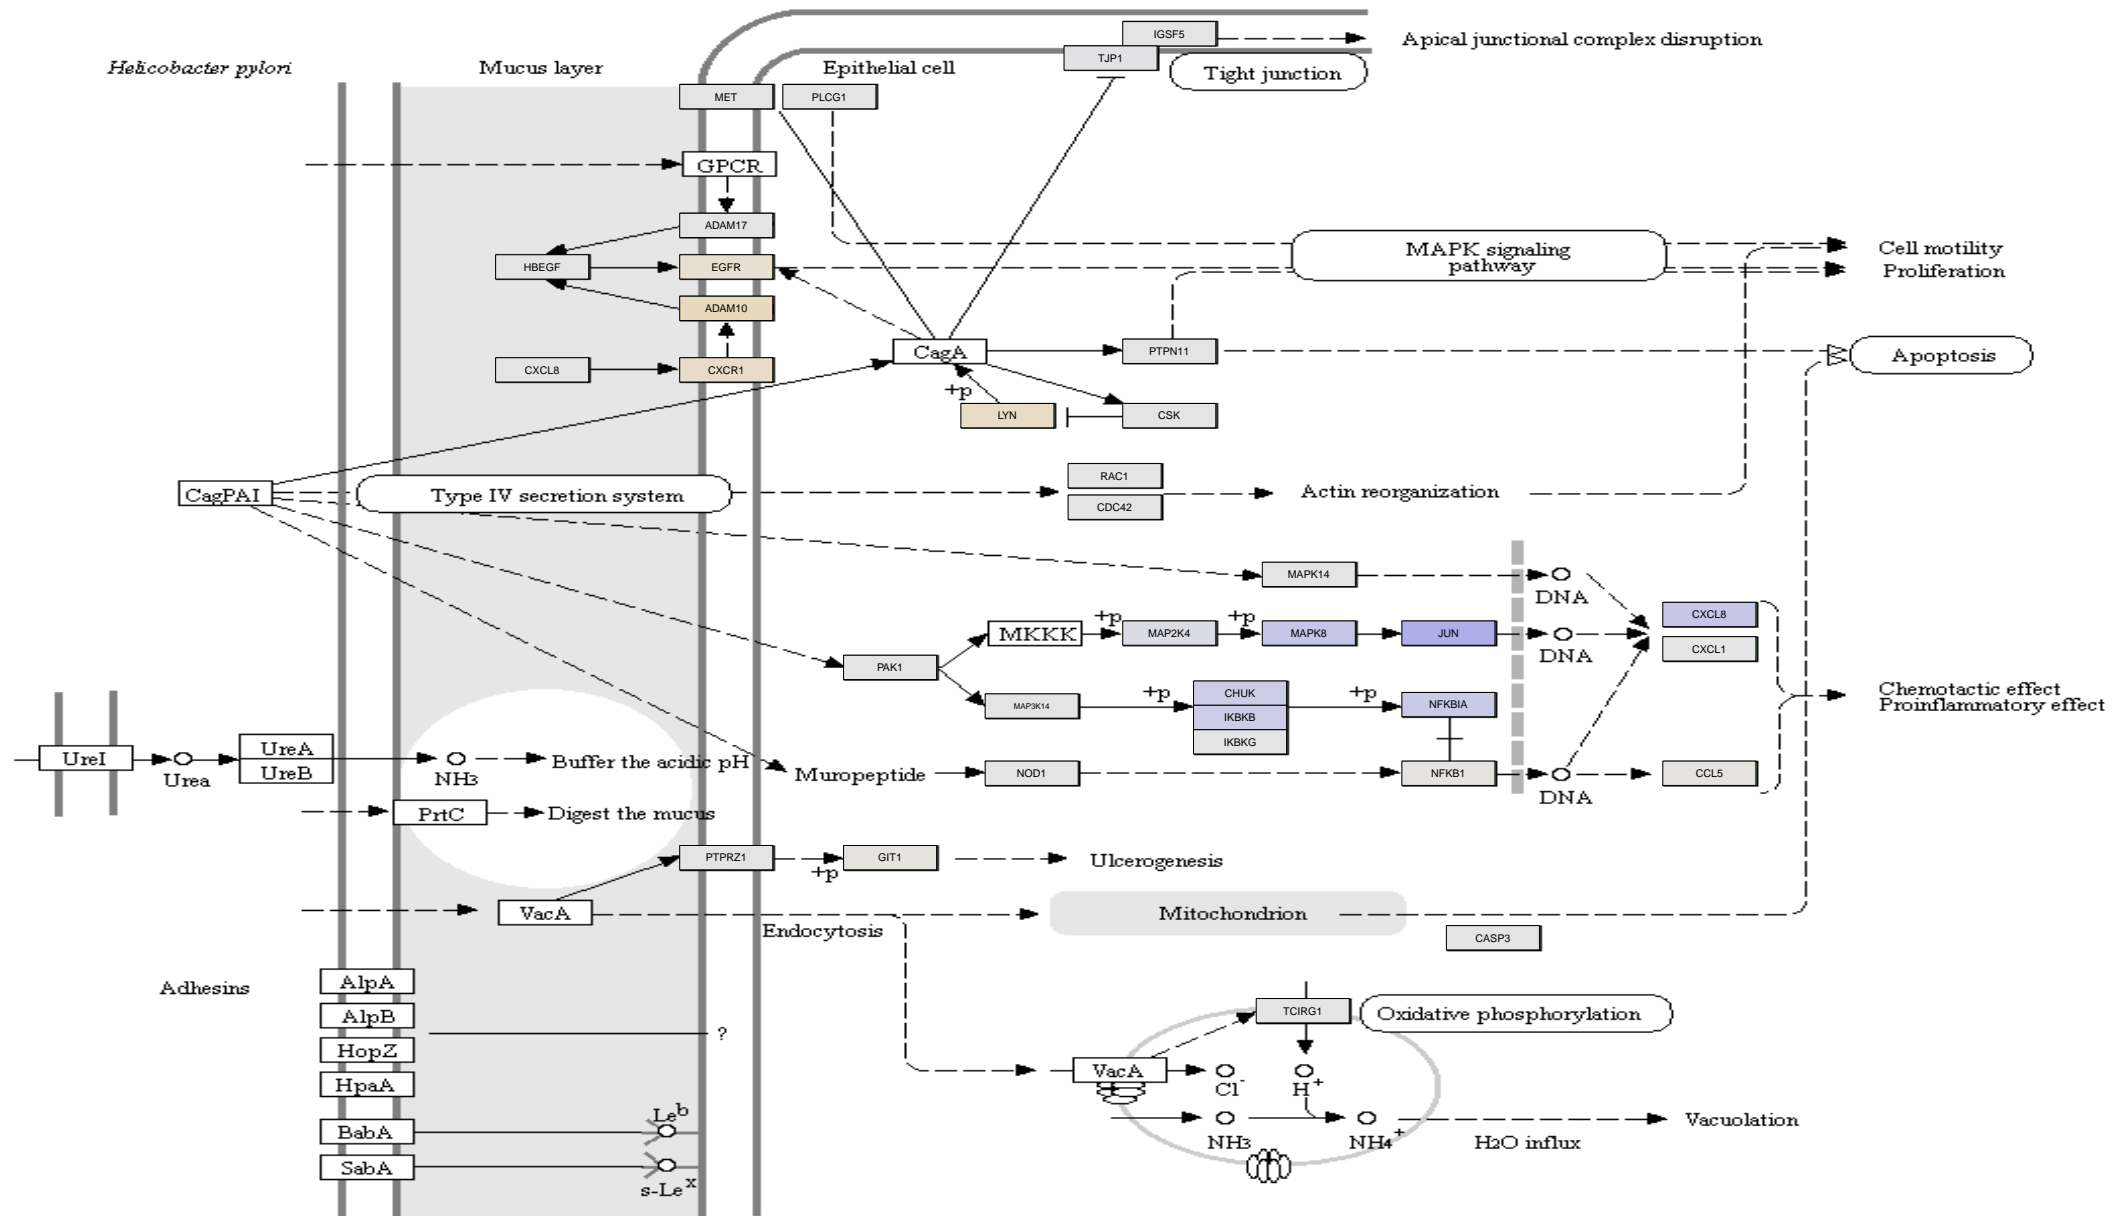

Supplement: s1 [file s1]

Toll-like receptor signaling pathway

all genes

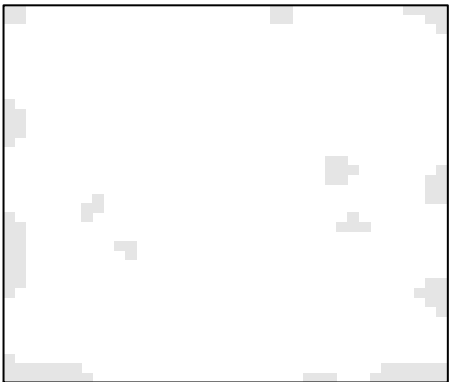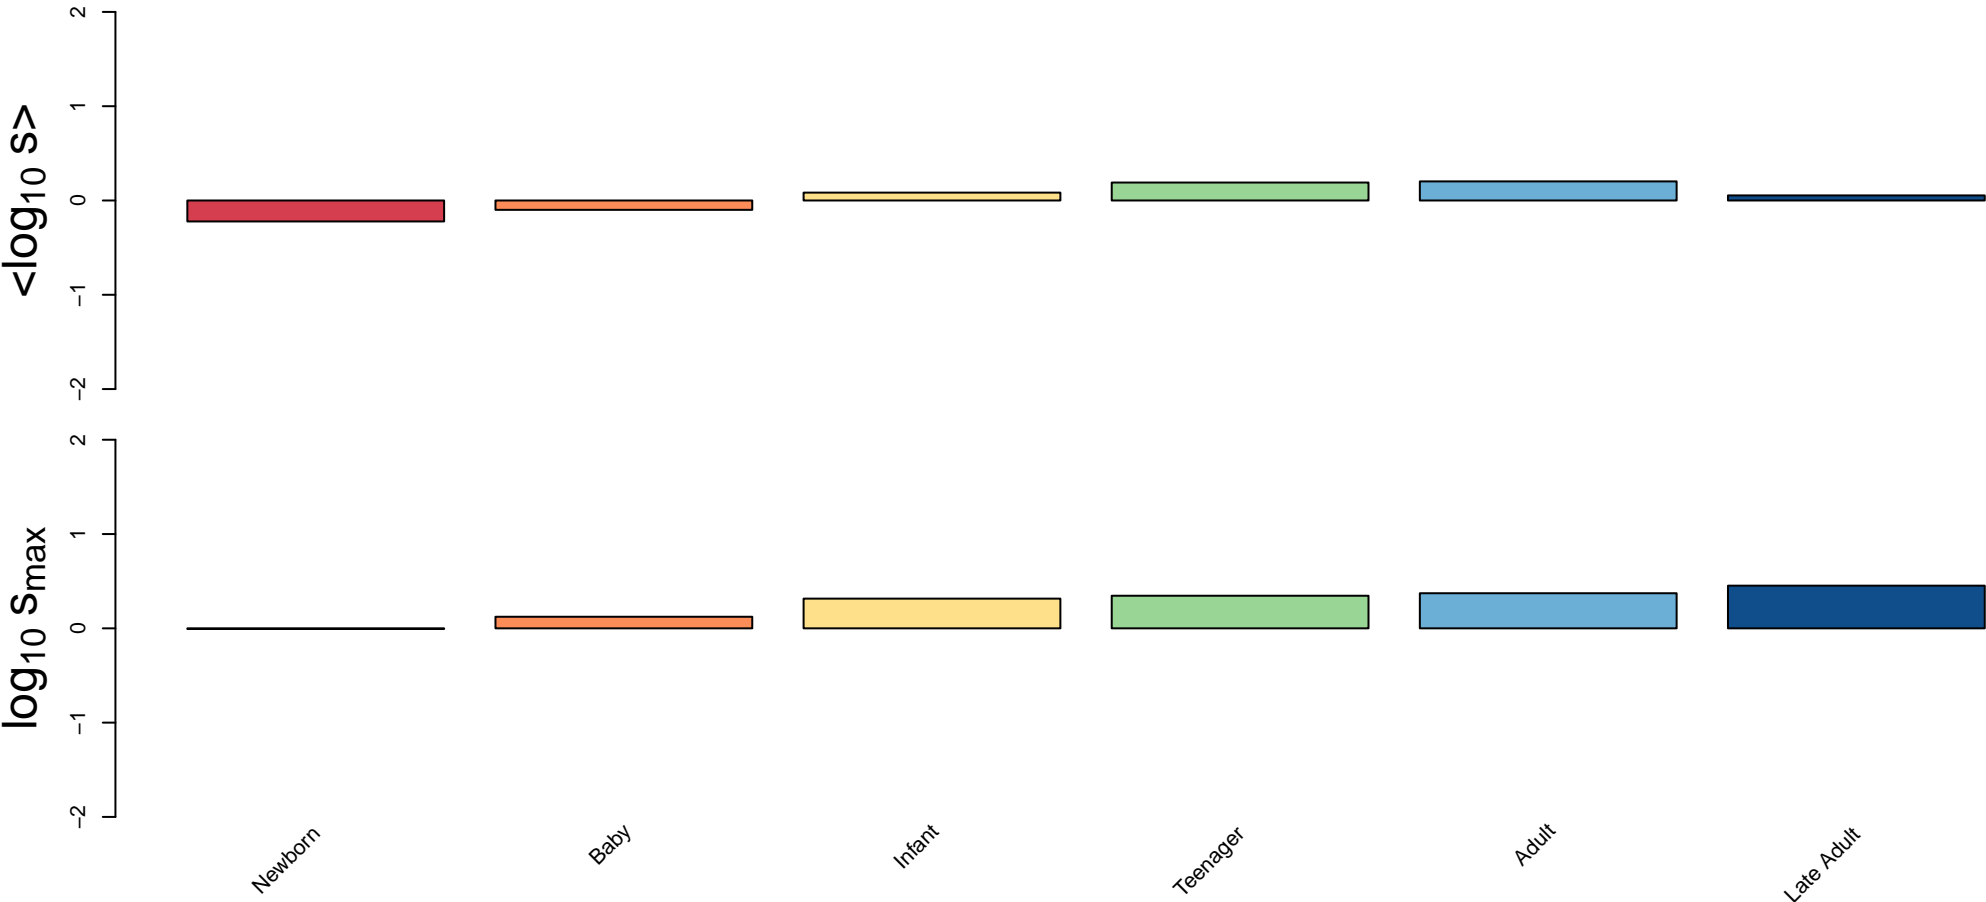

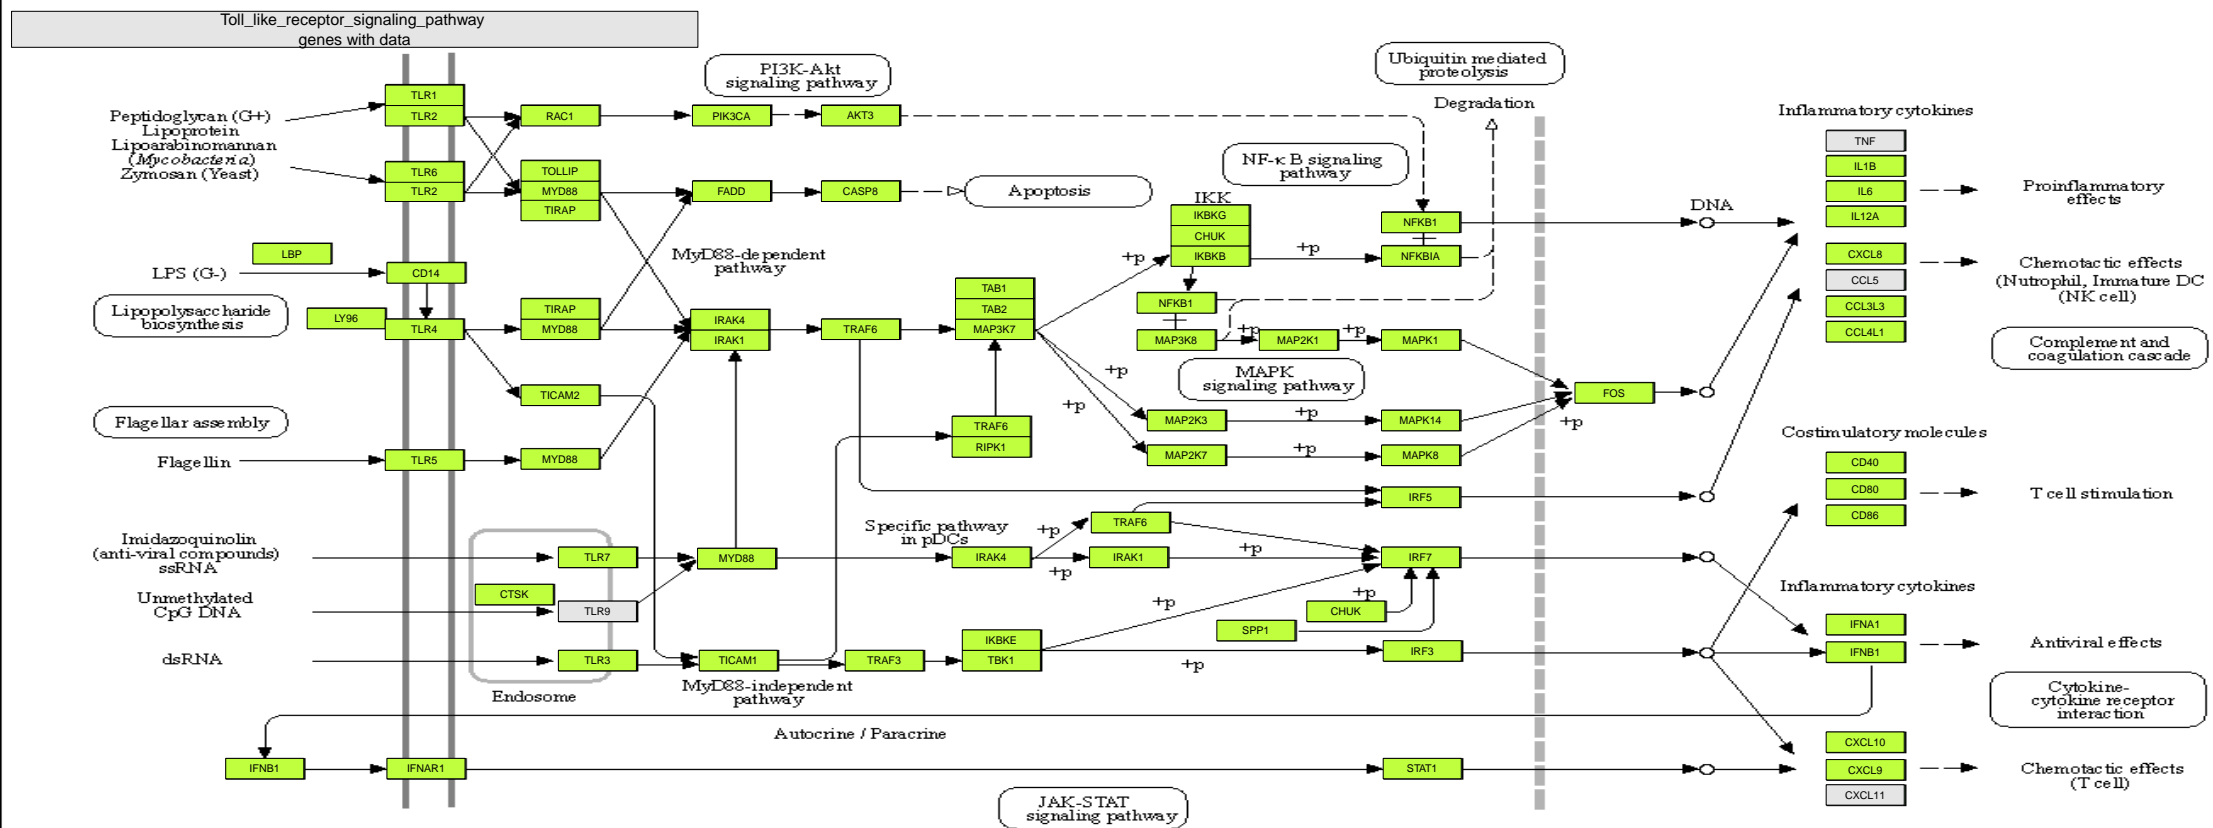

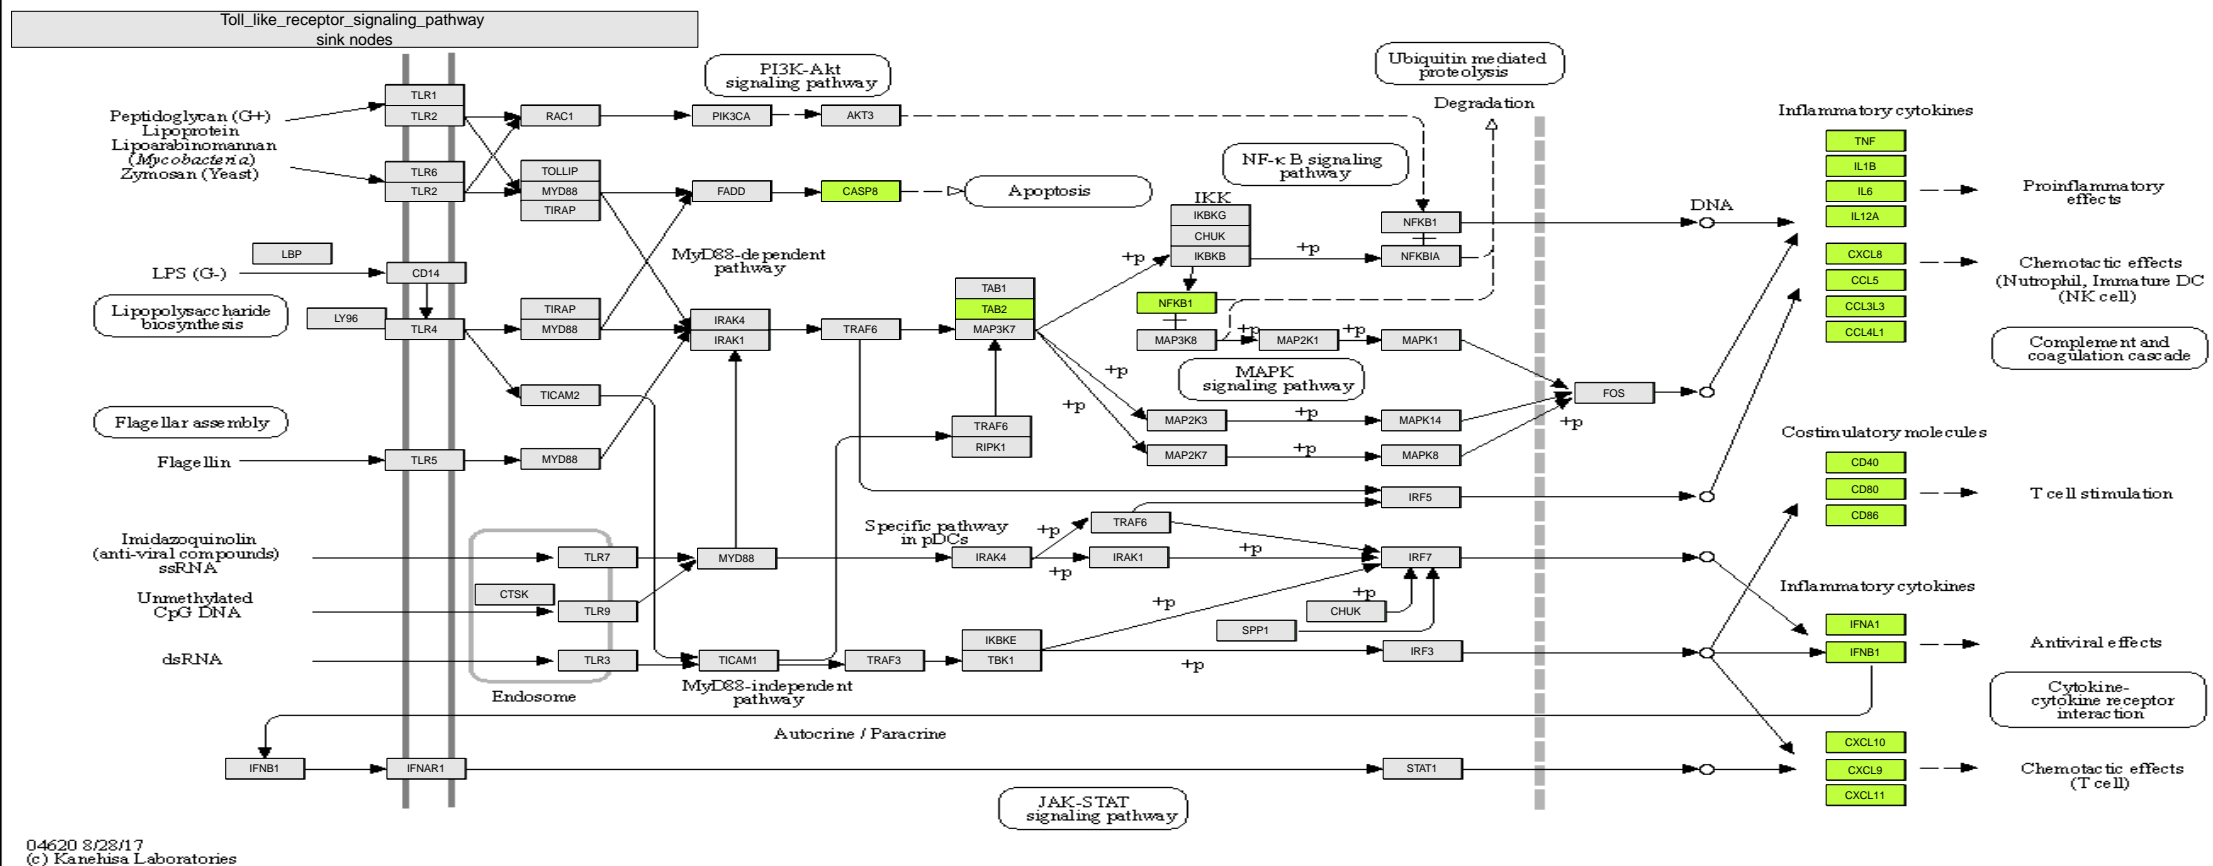

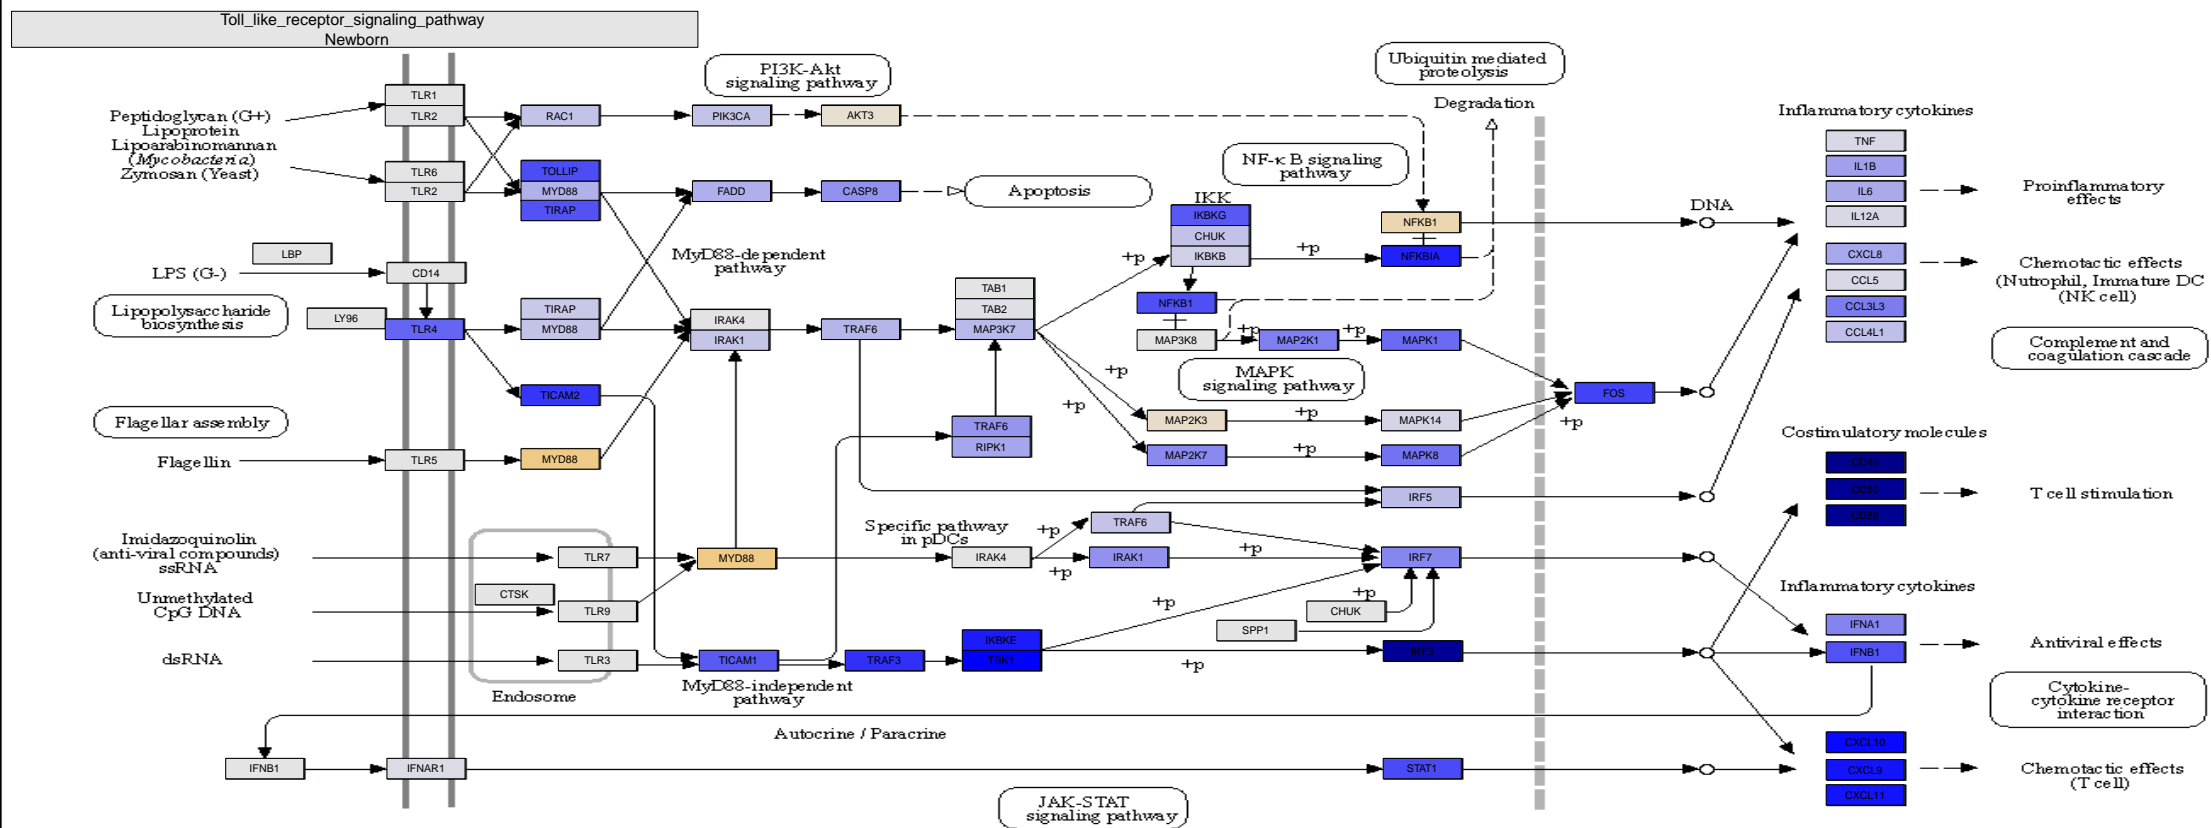

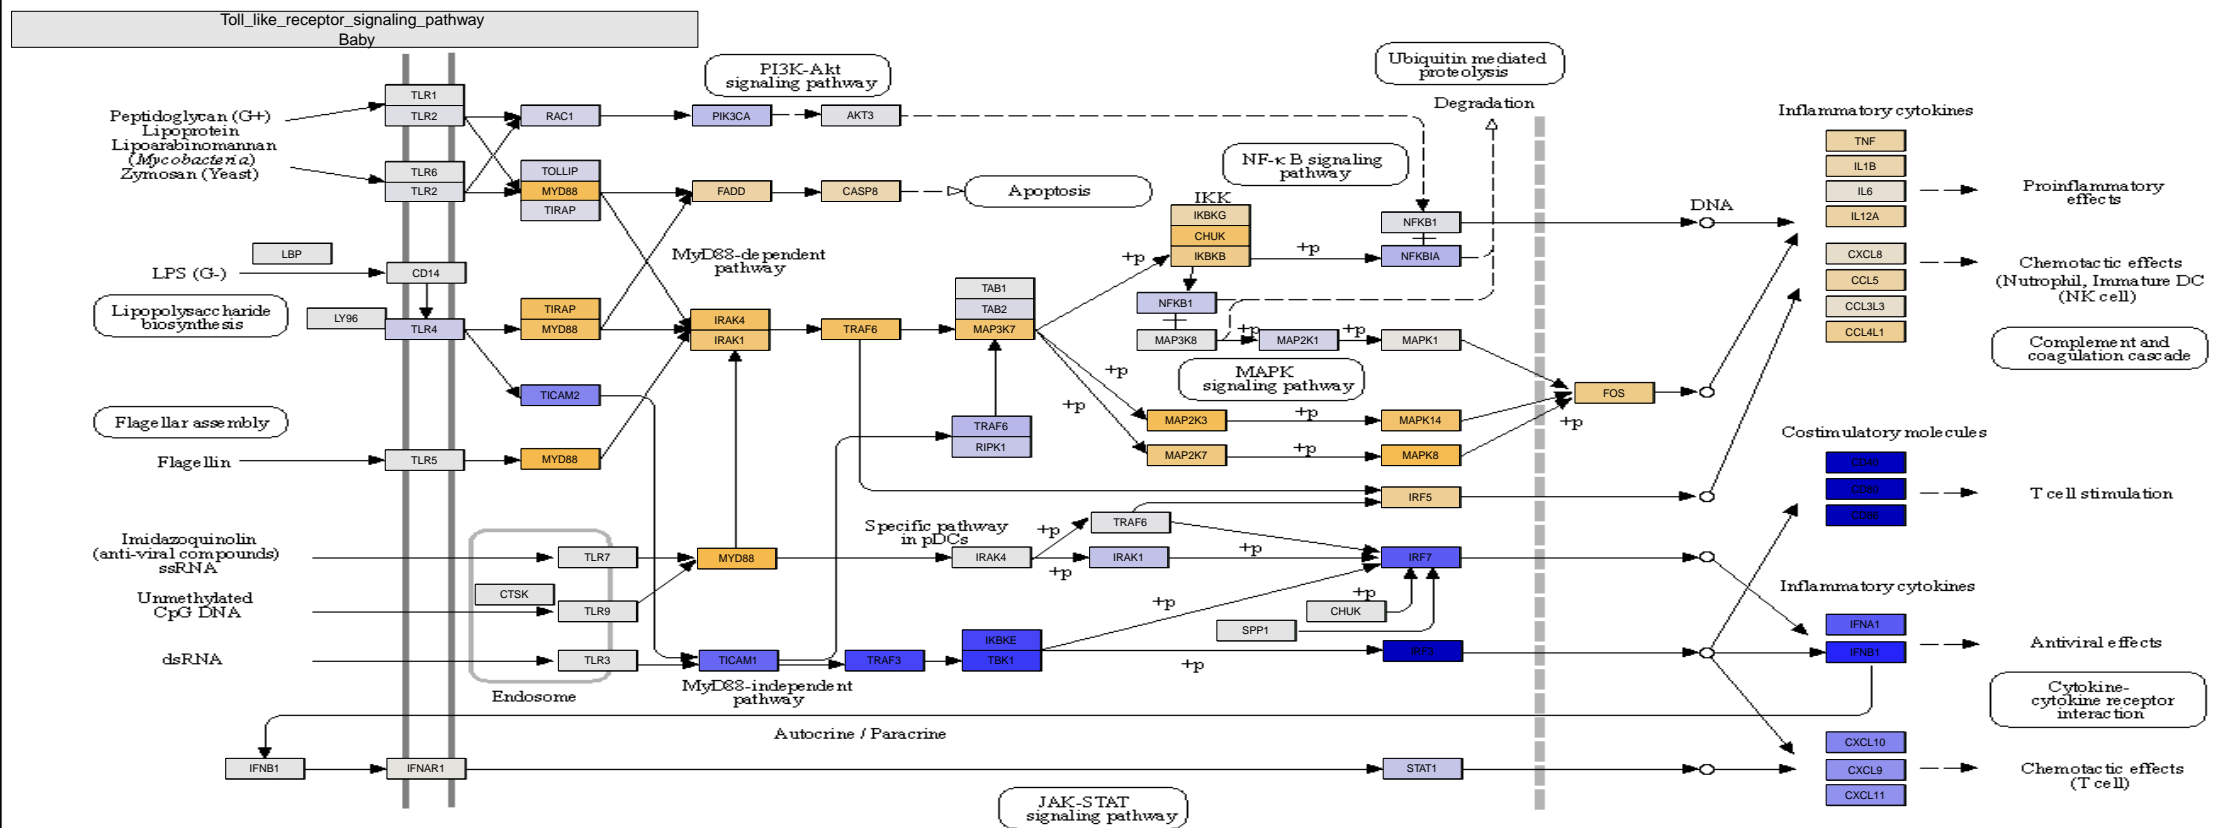

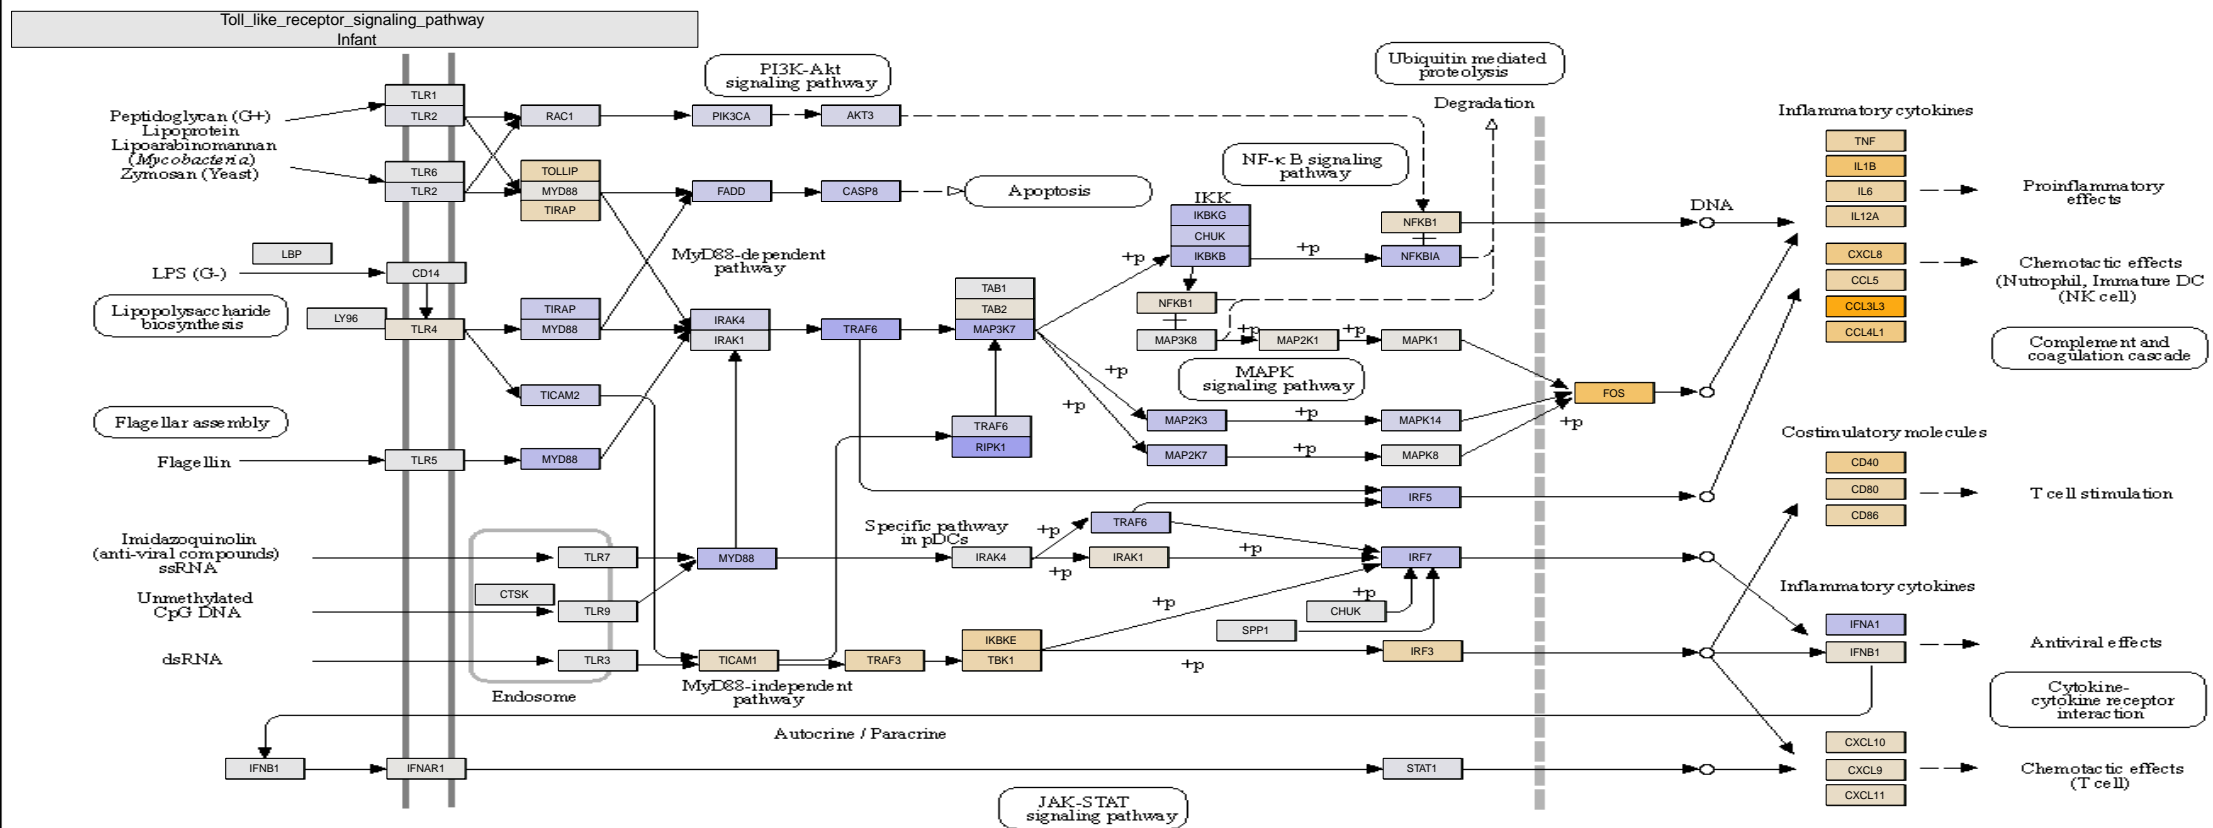

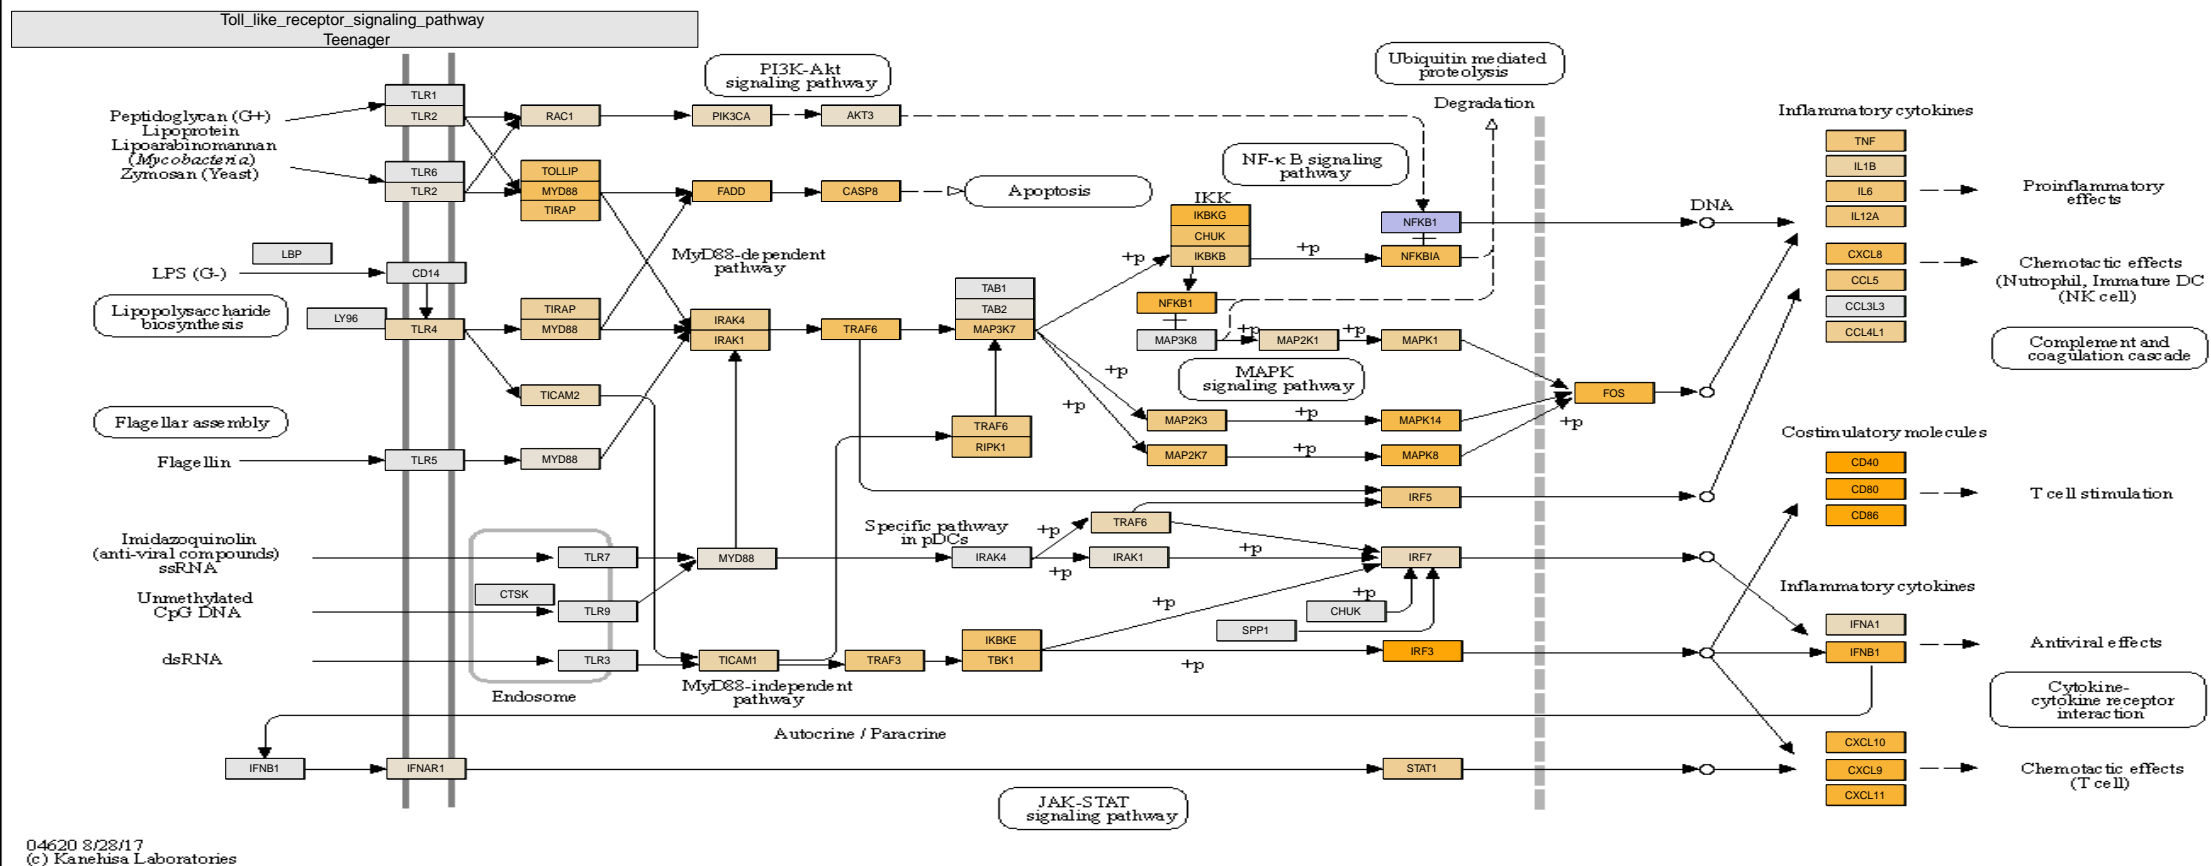

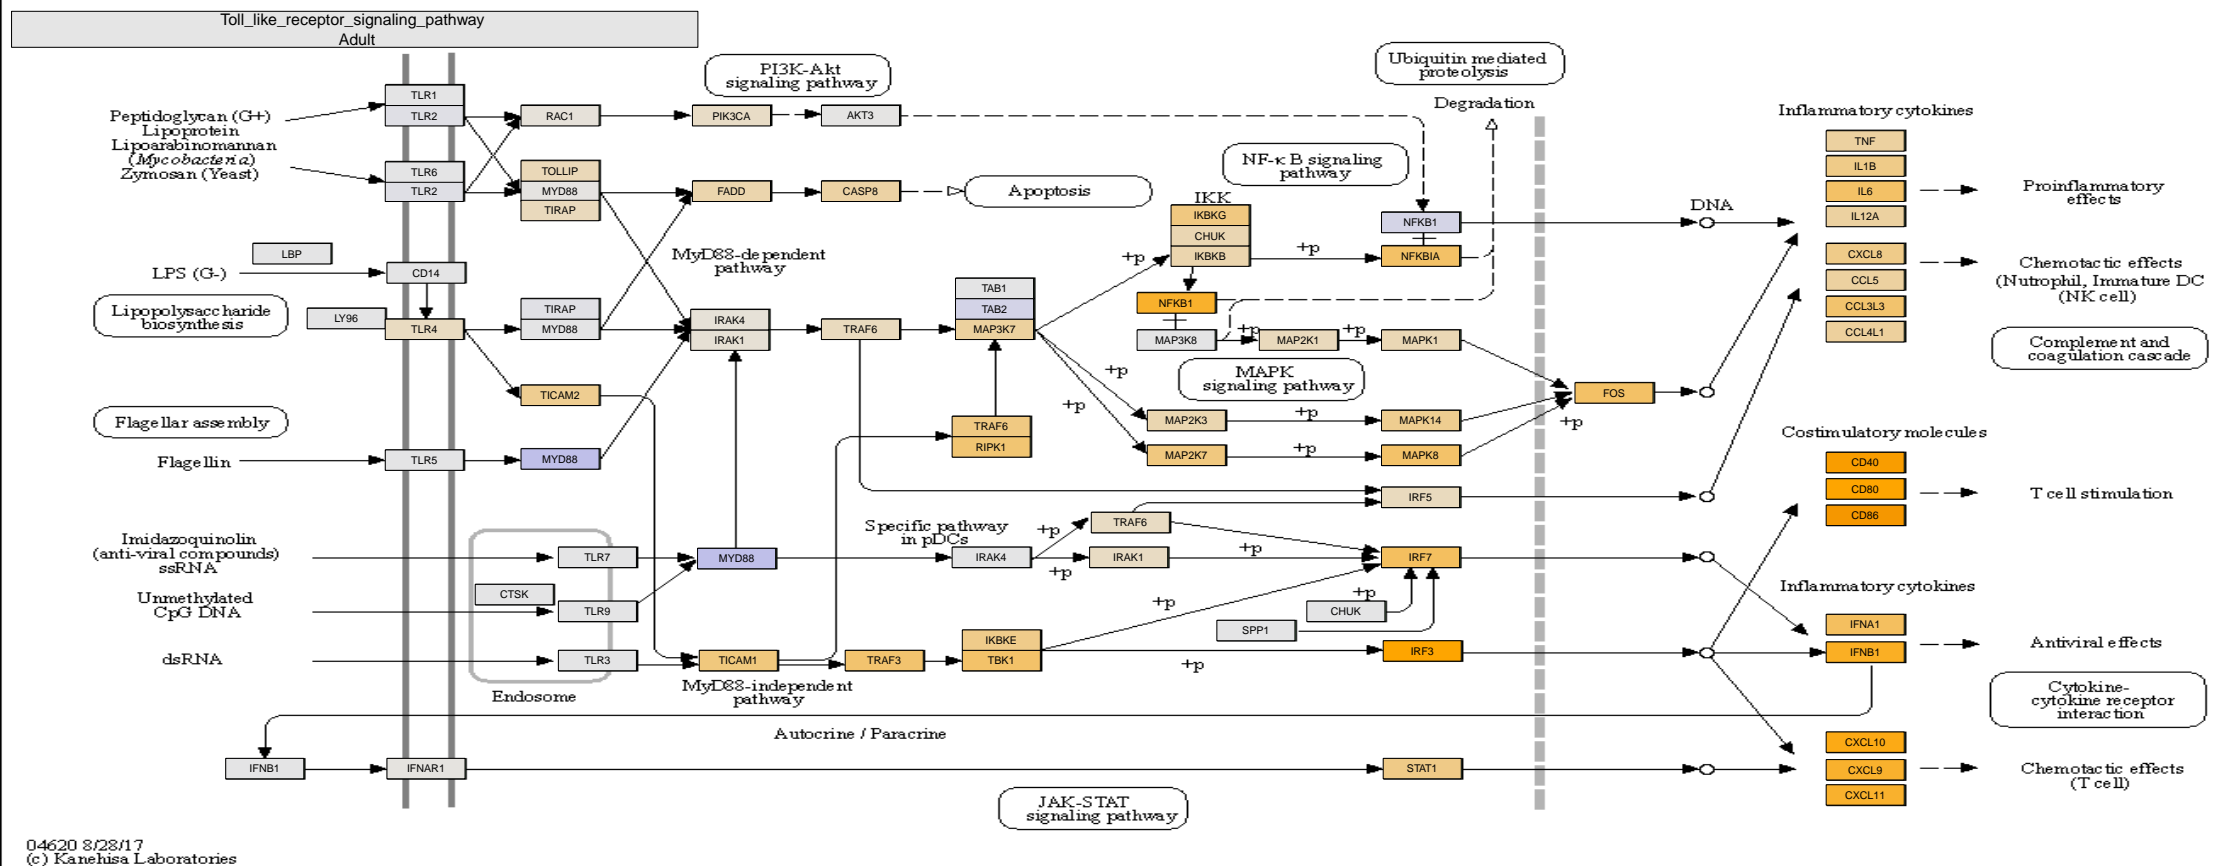



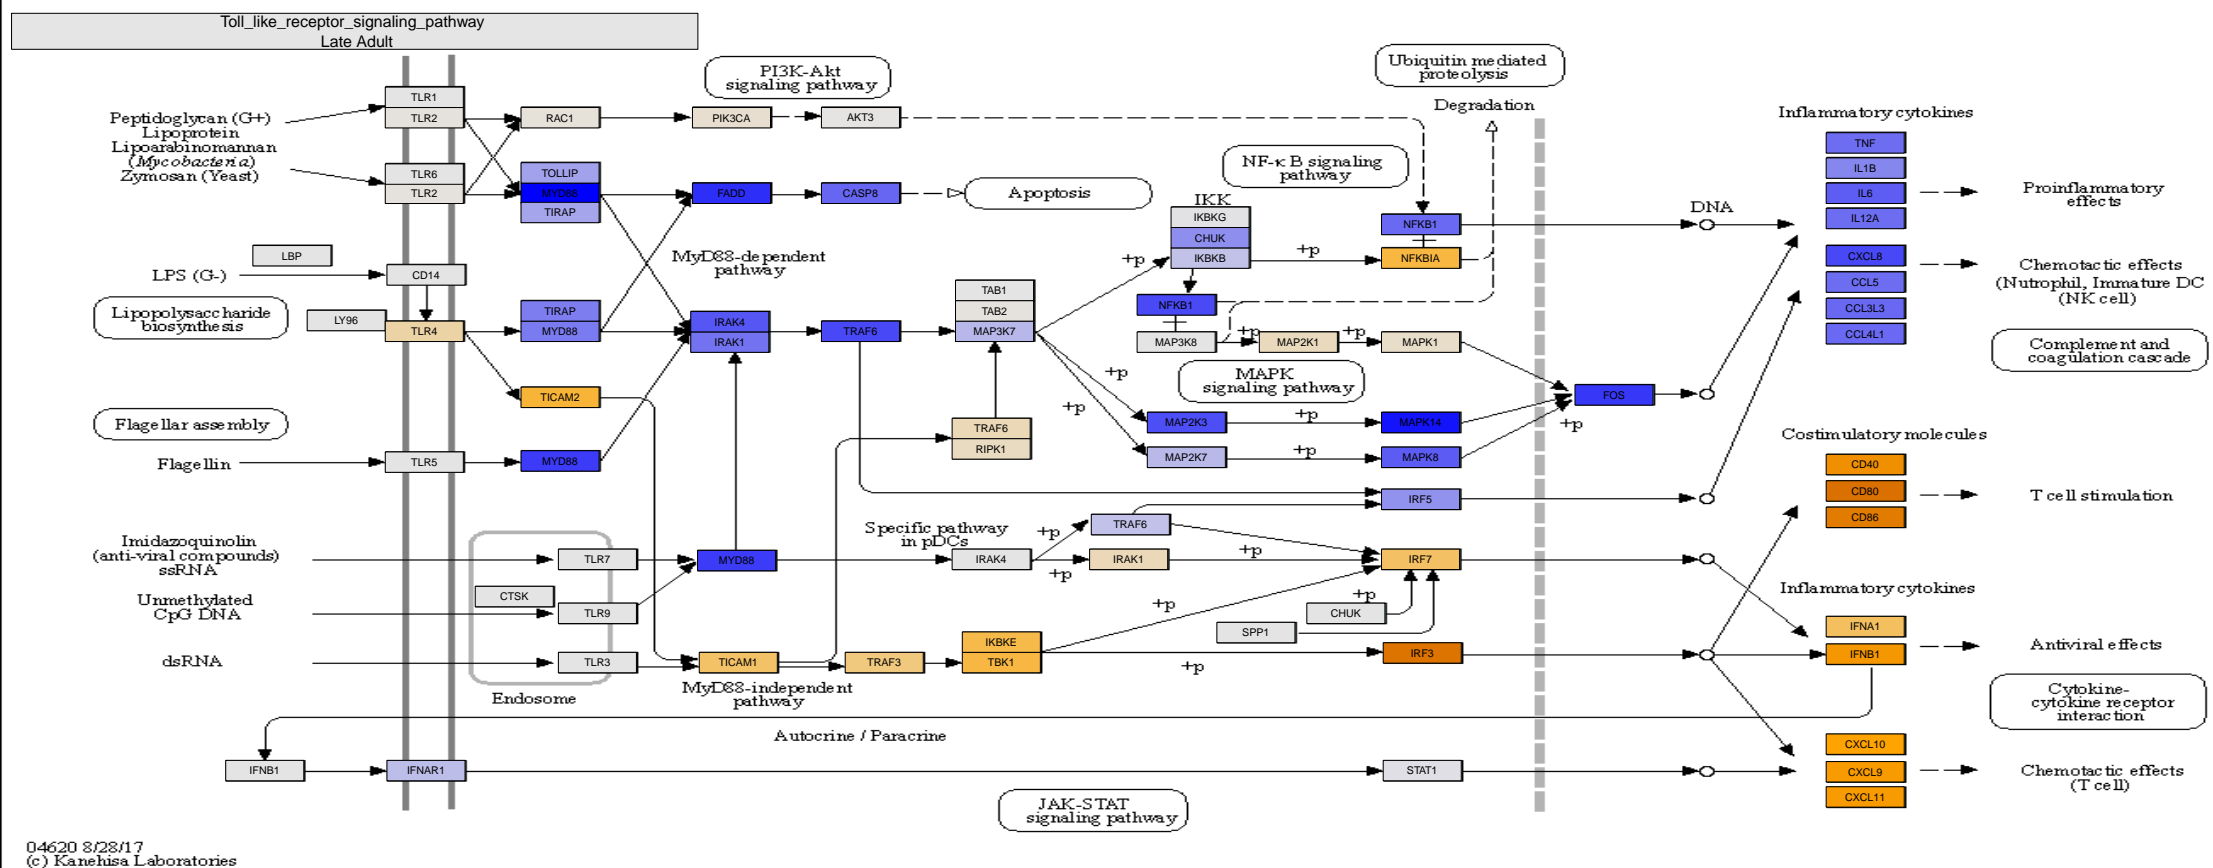

Supplement: s1 [file s1]

mean signal

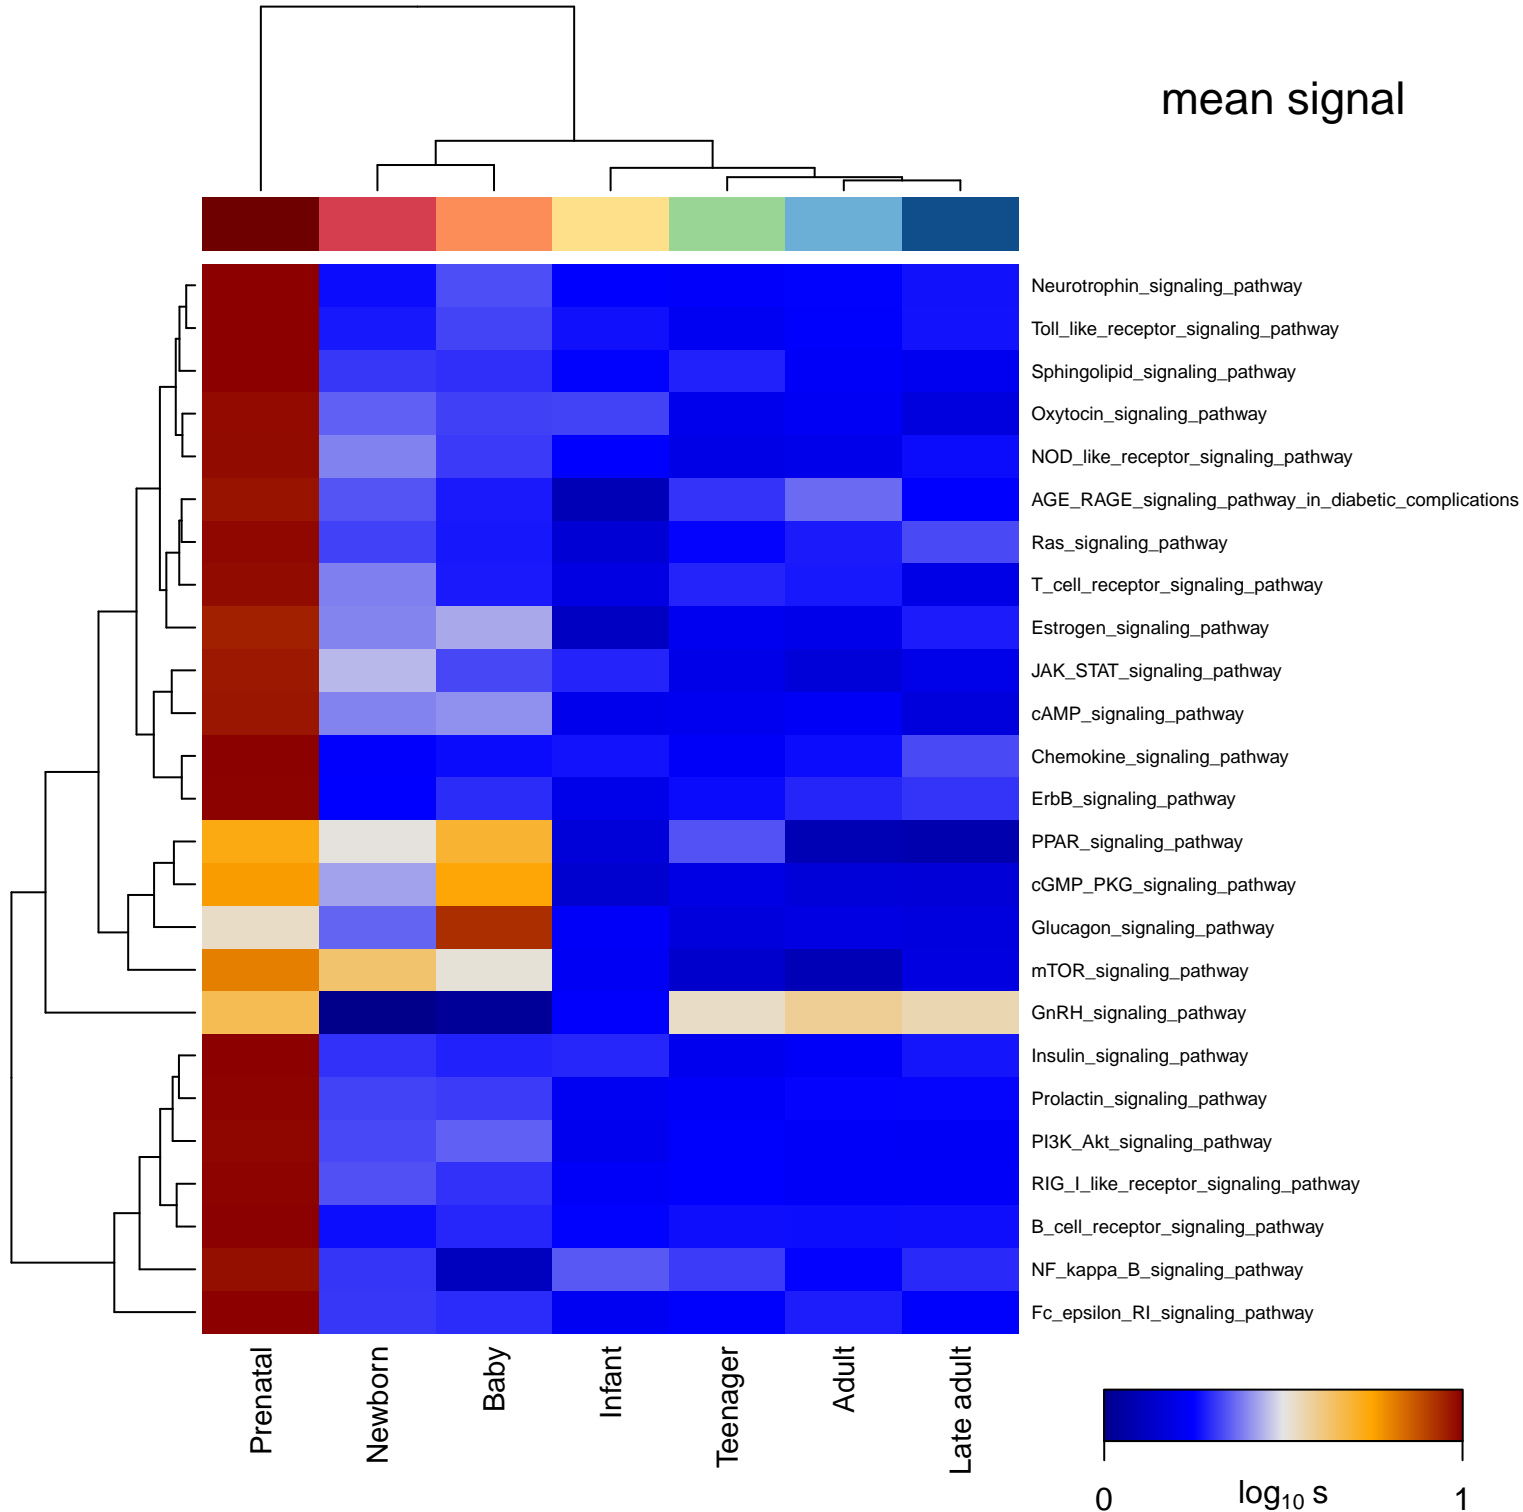

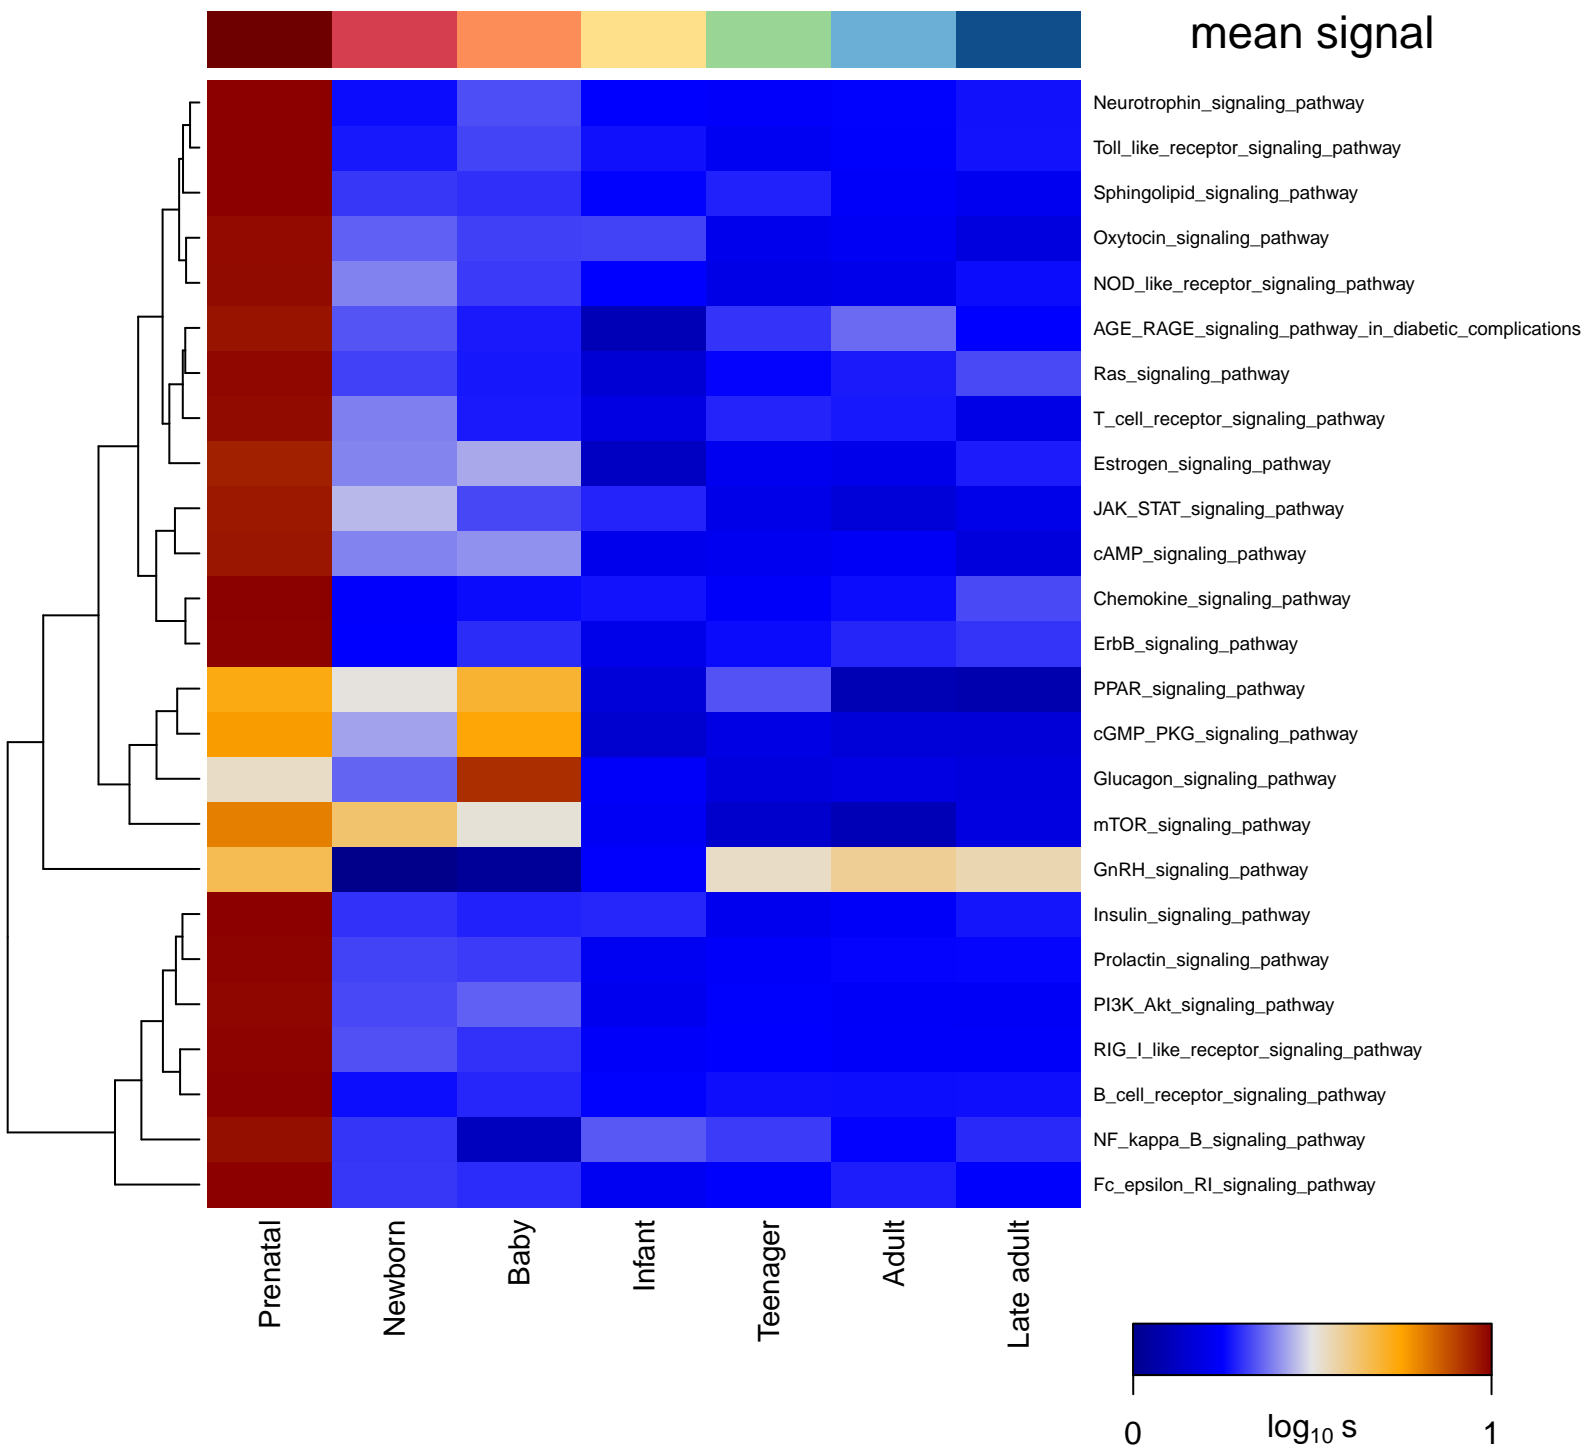

signal maximum

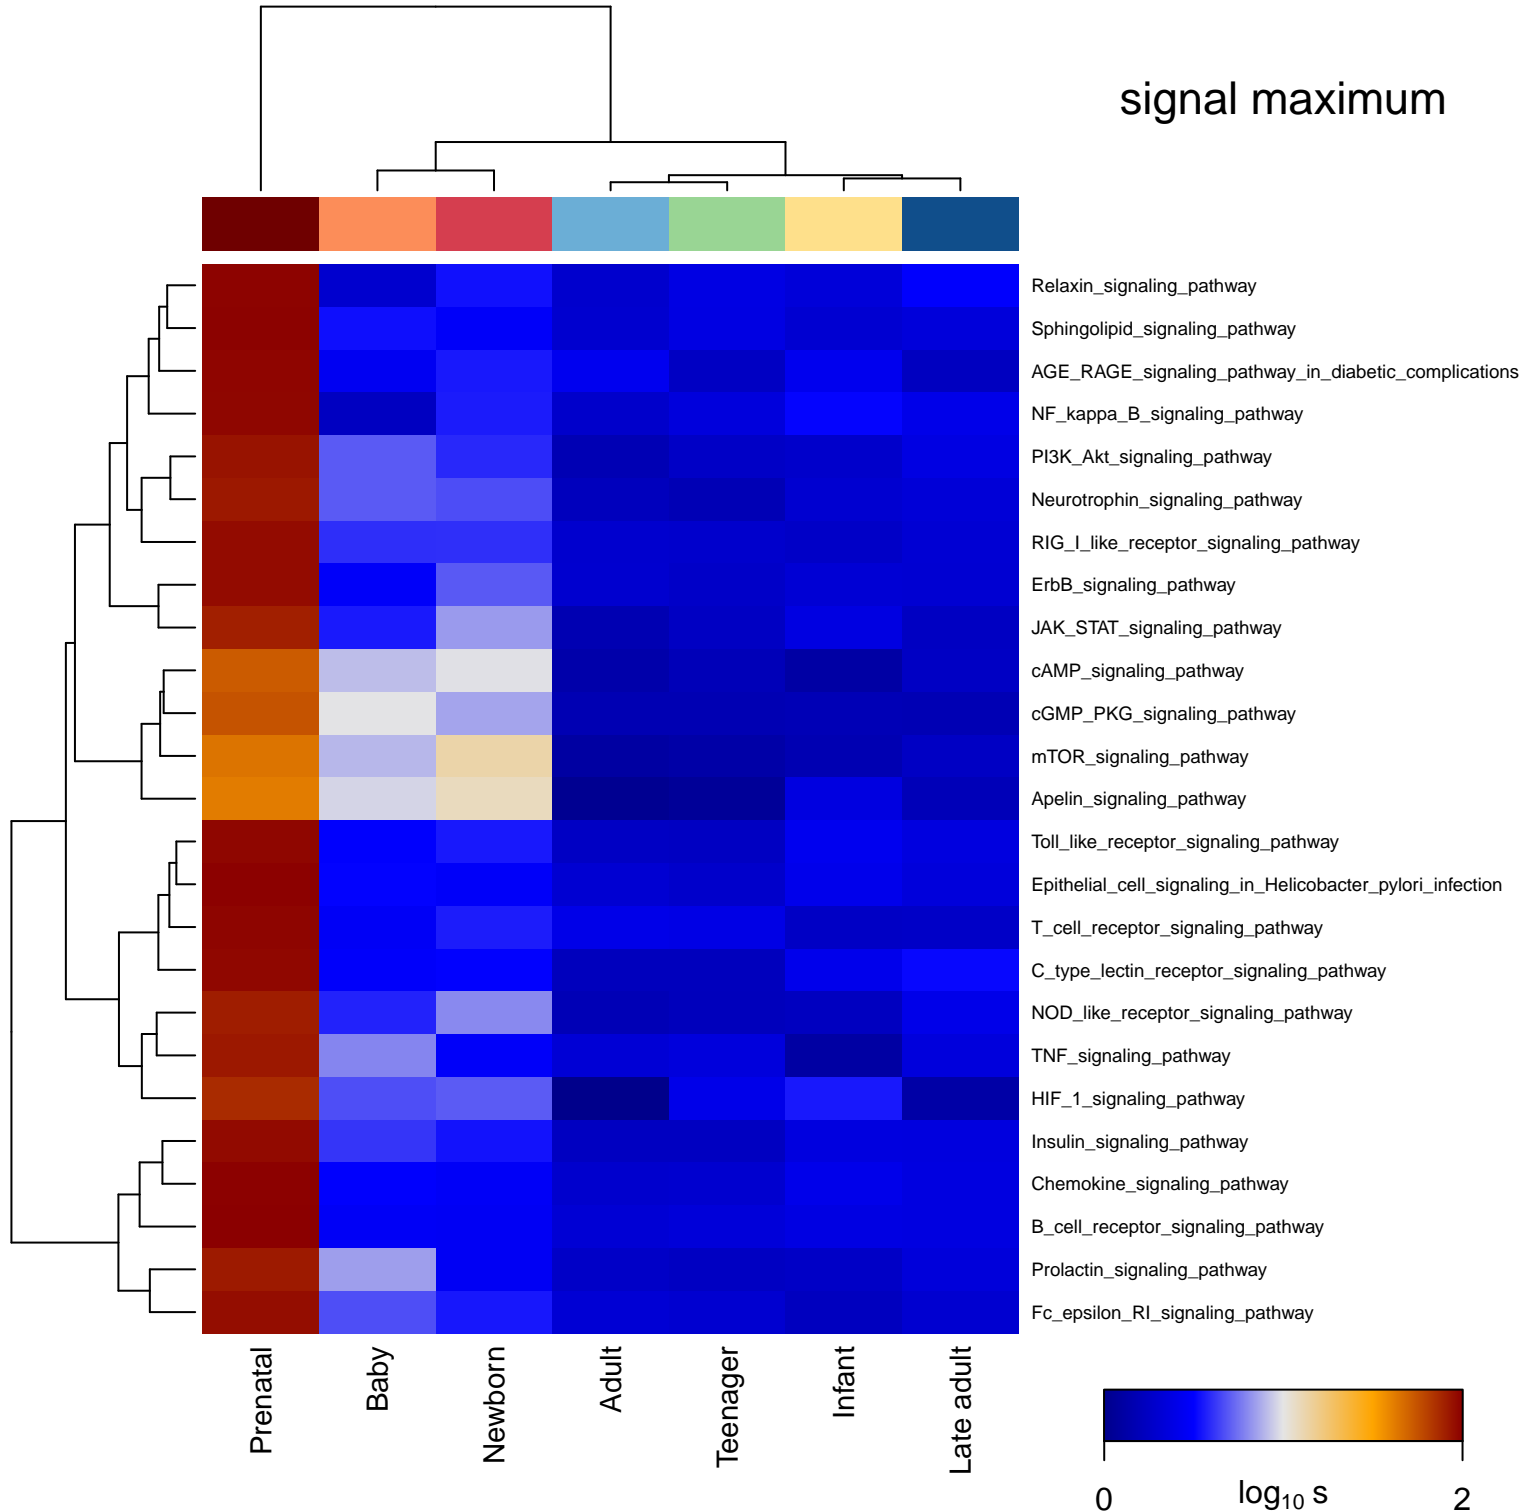

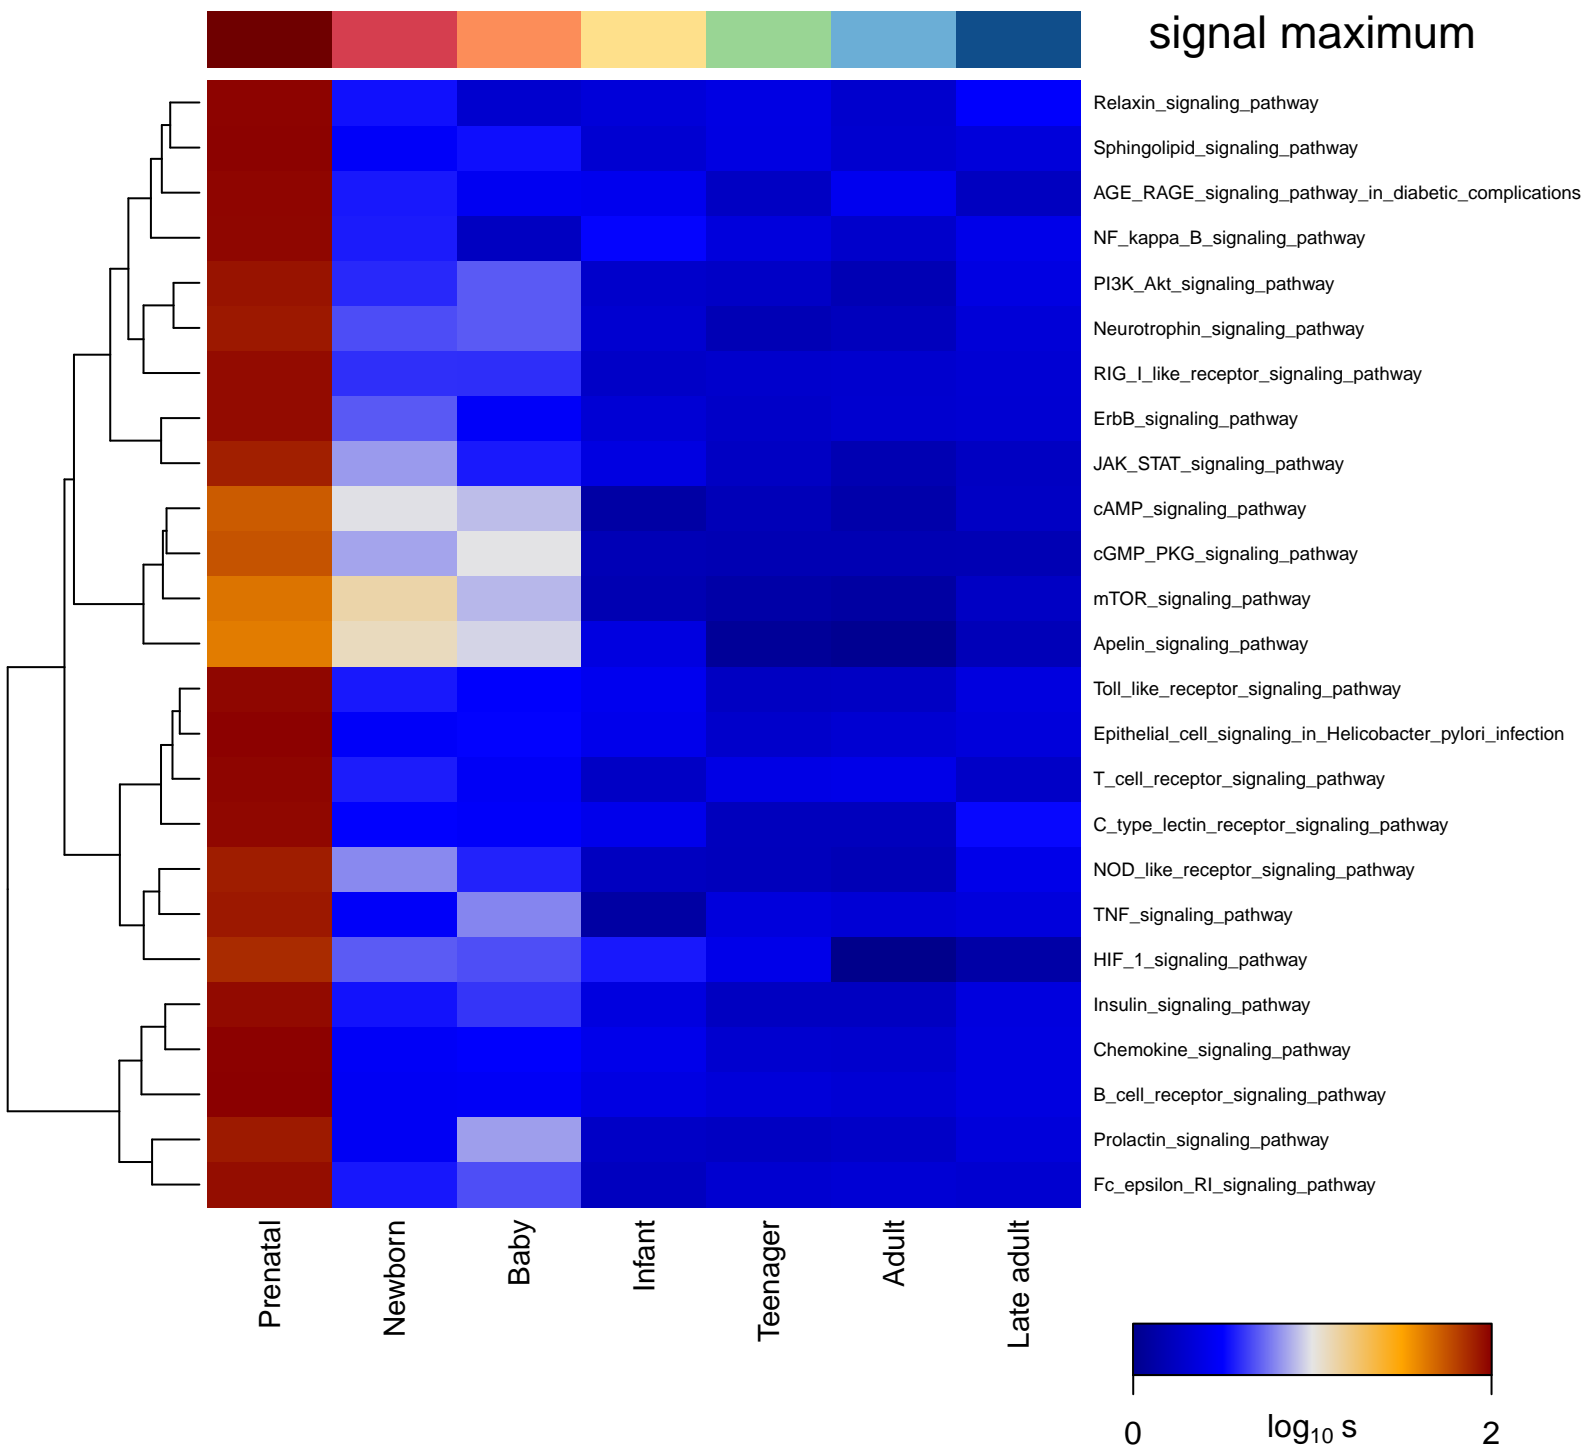

Supplement: s1 [file s1]

all genes

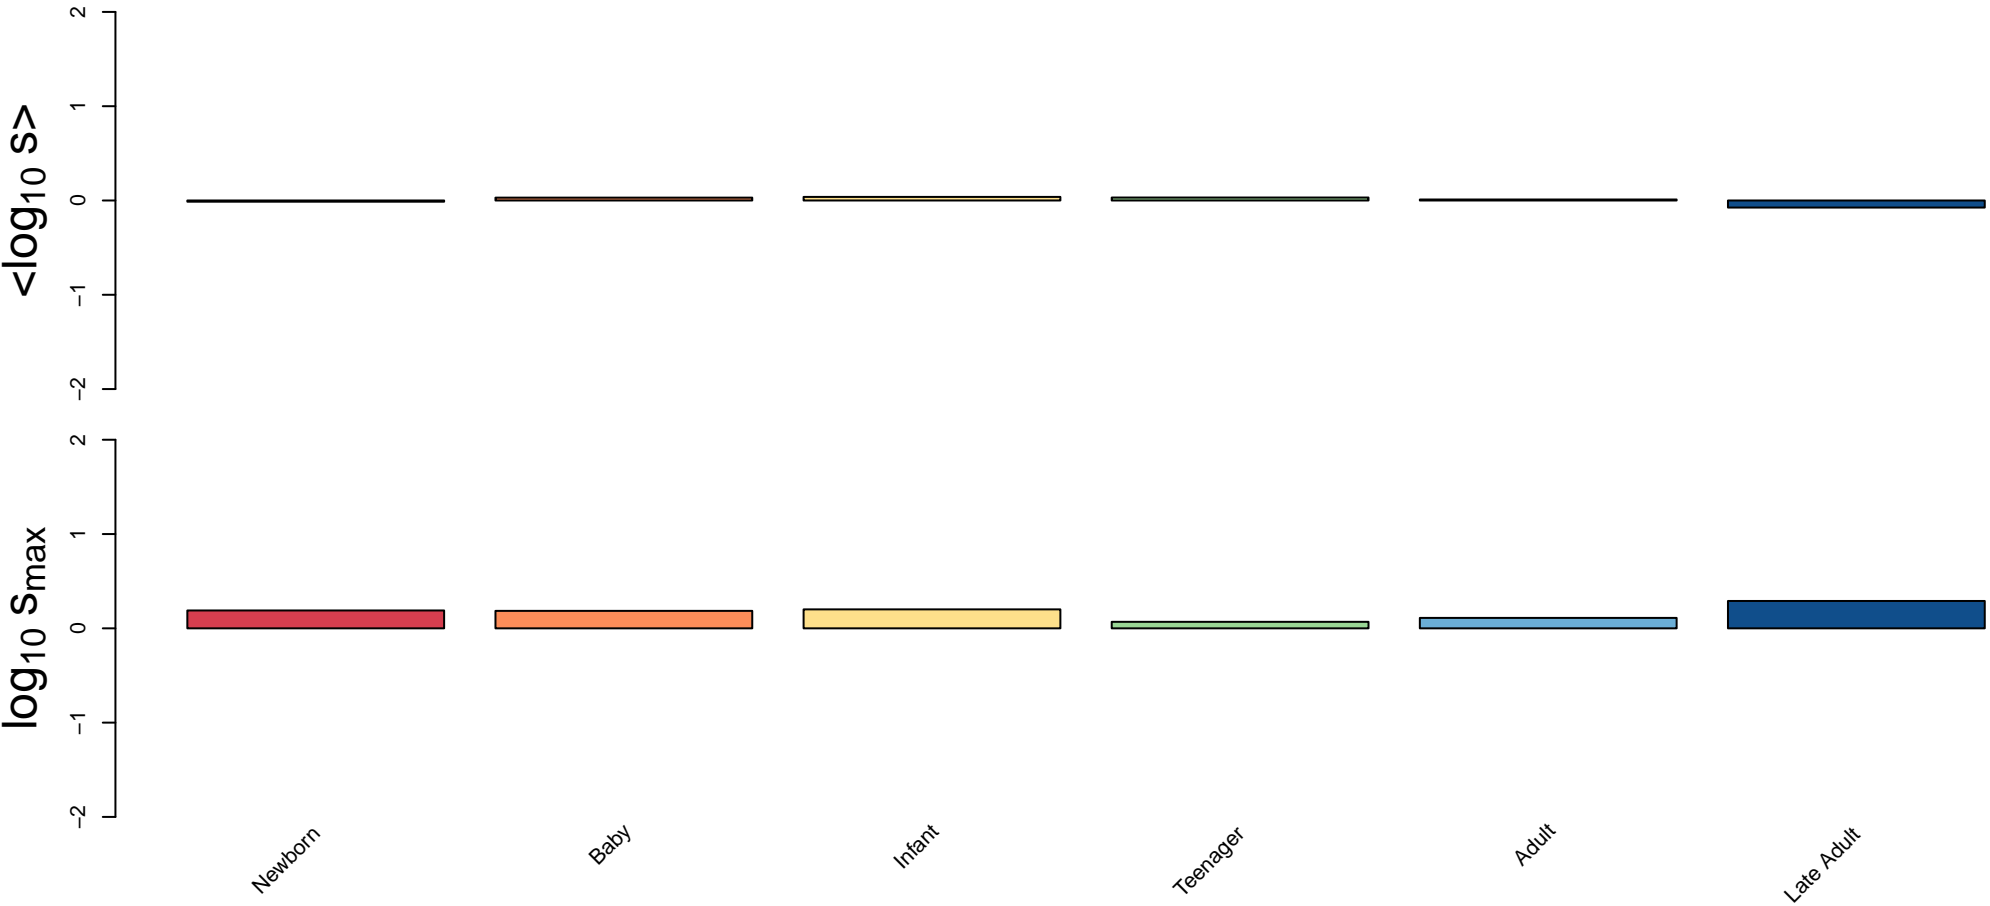

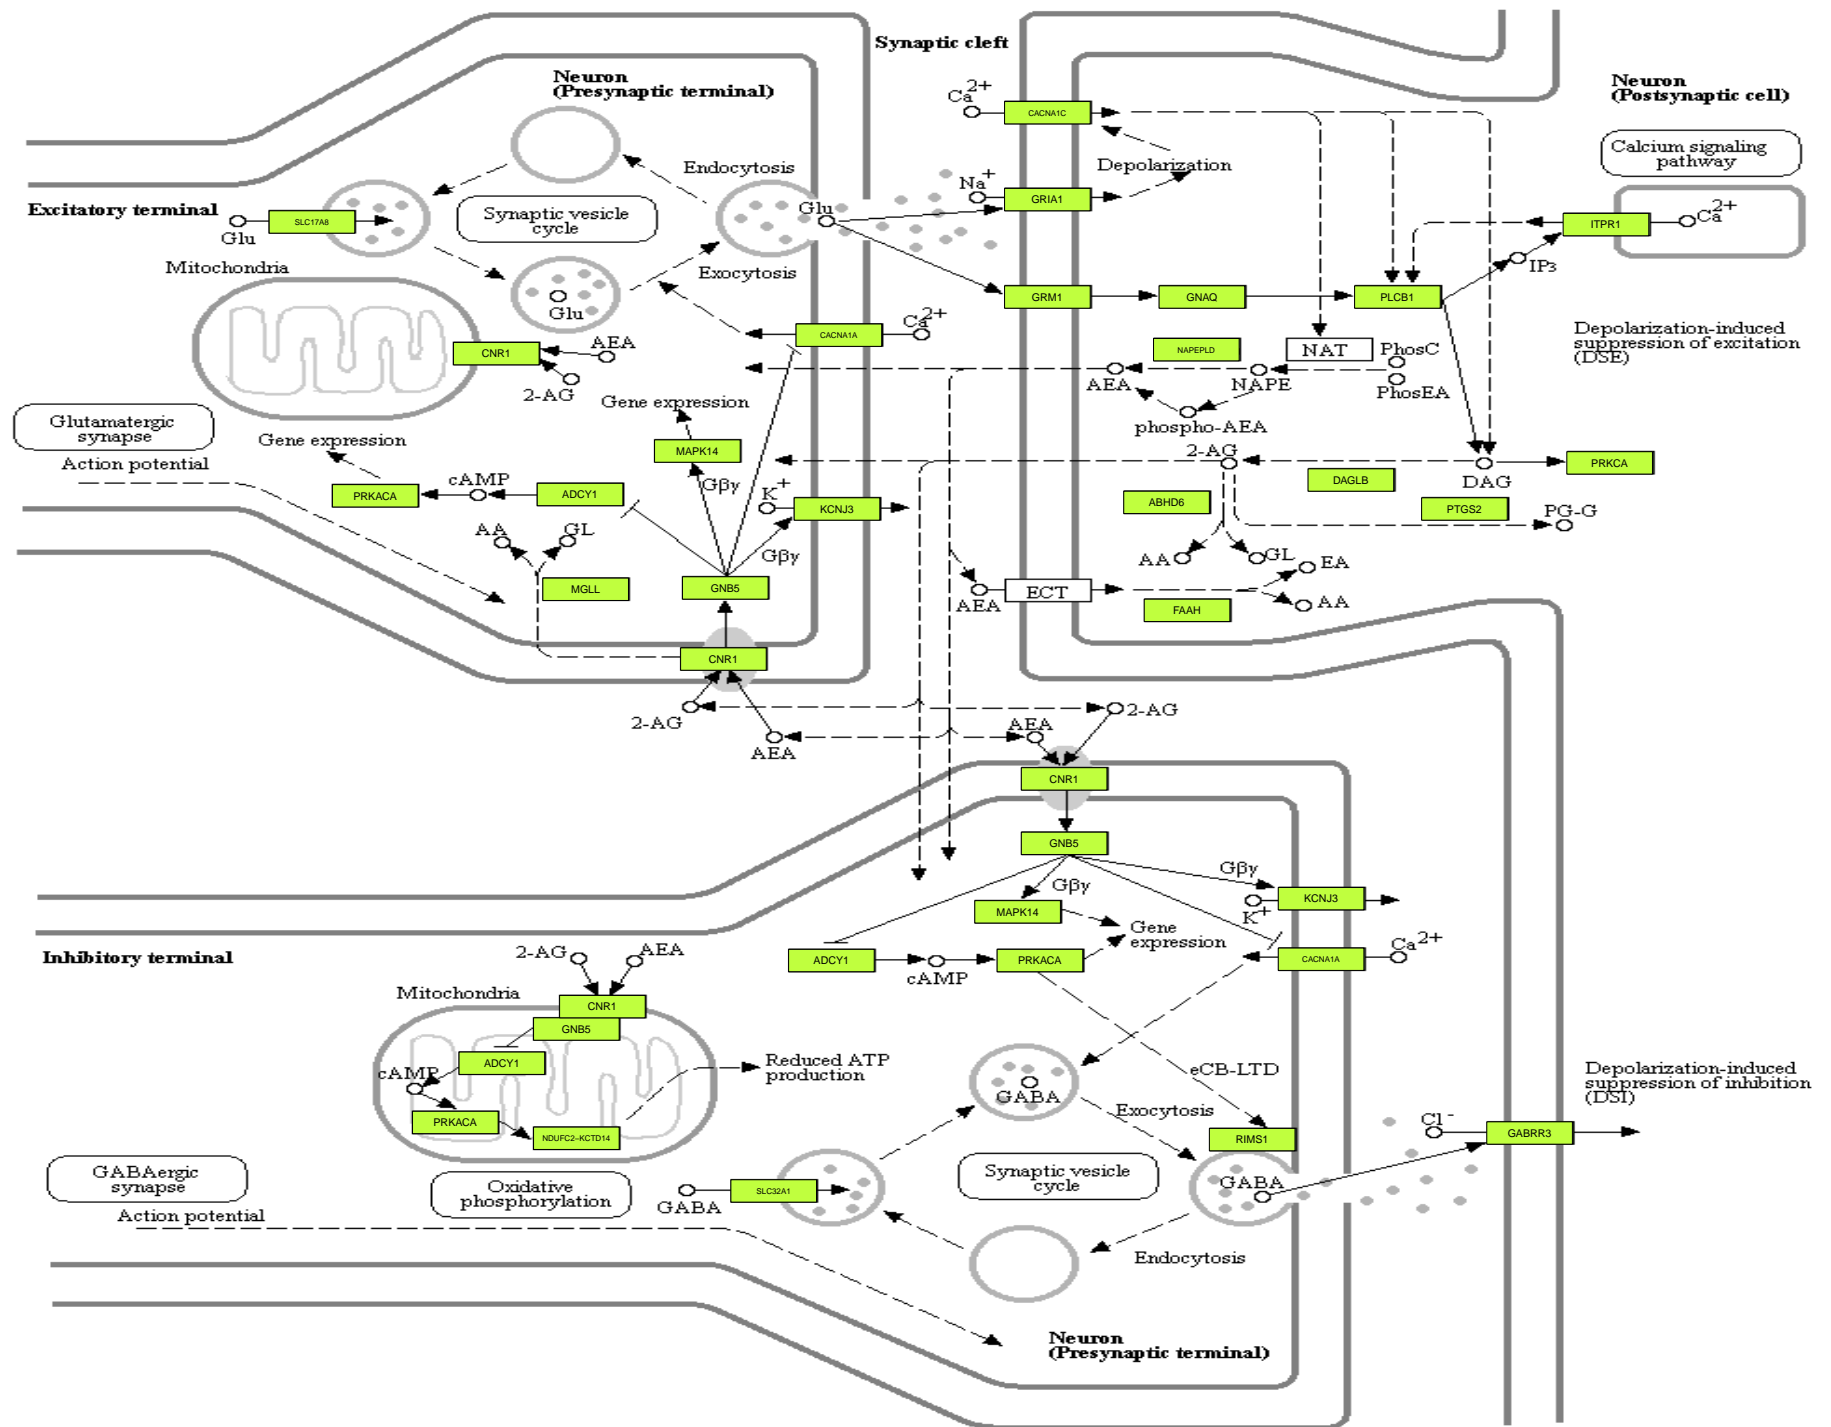

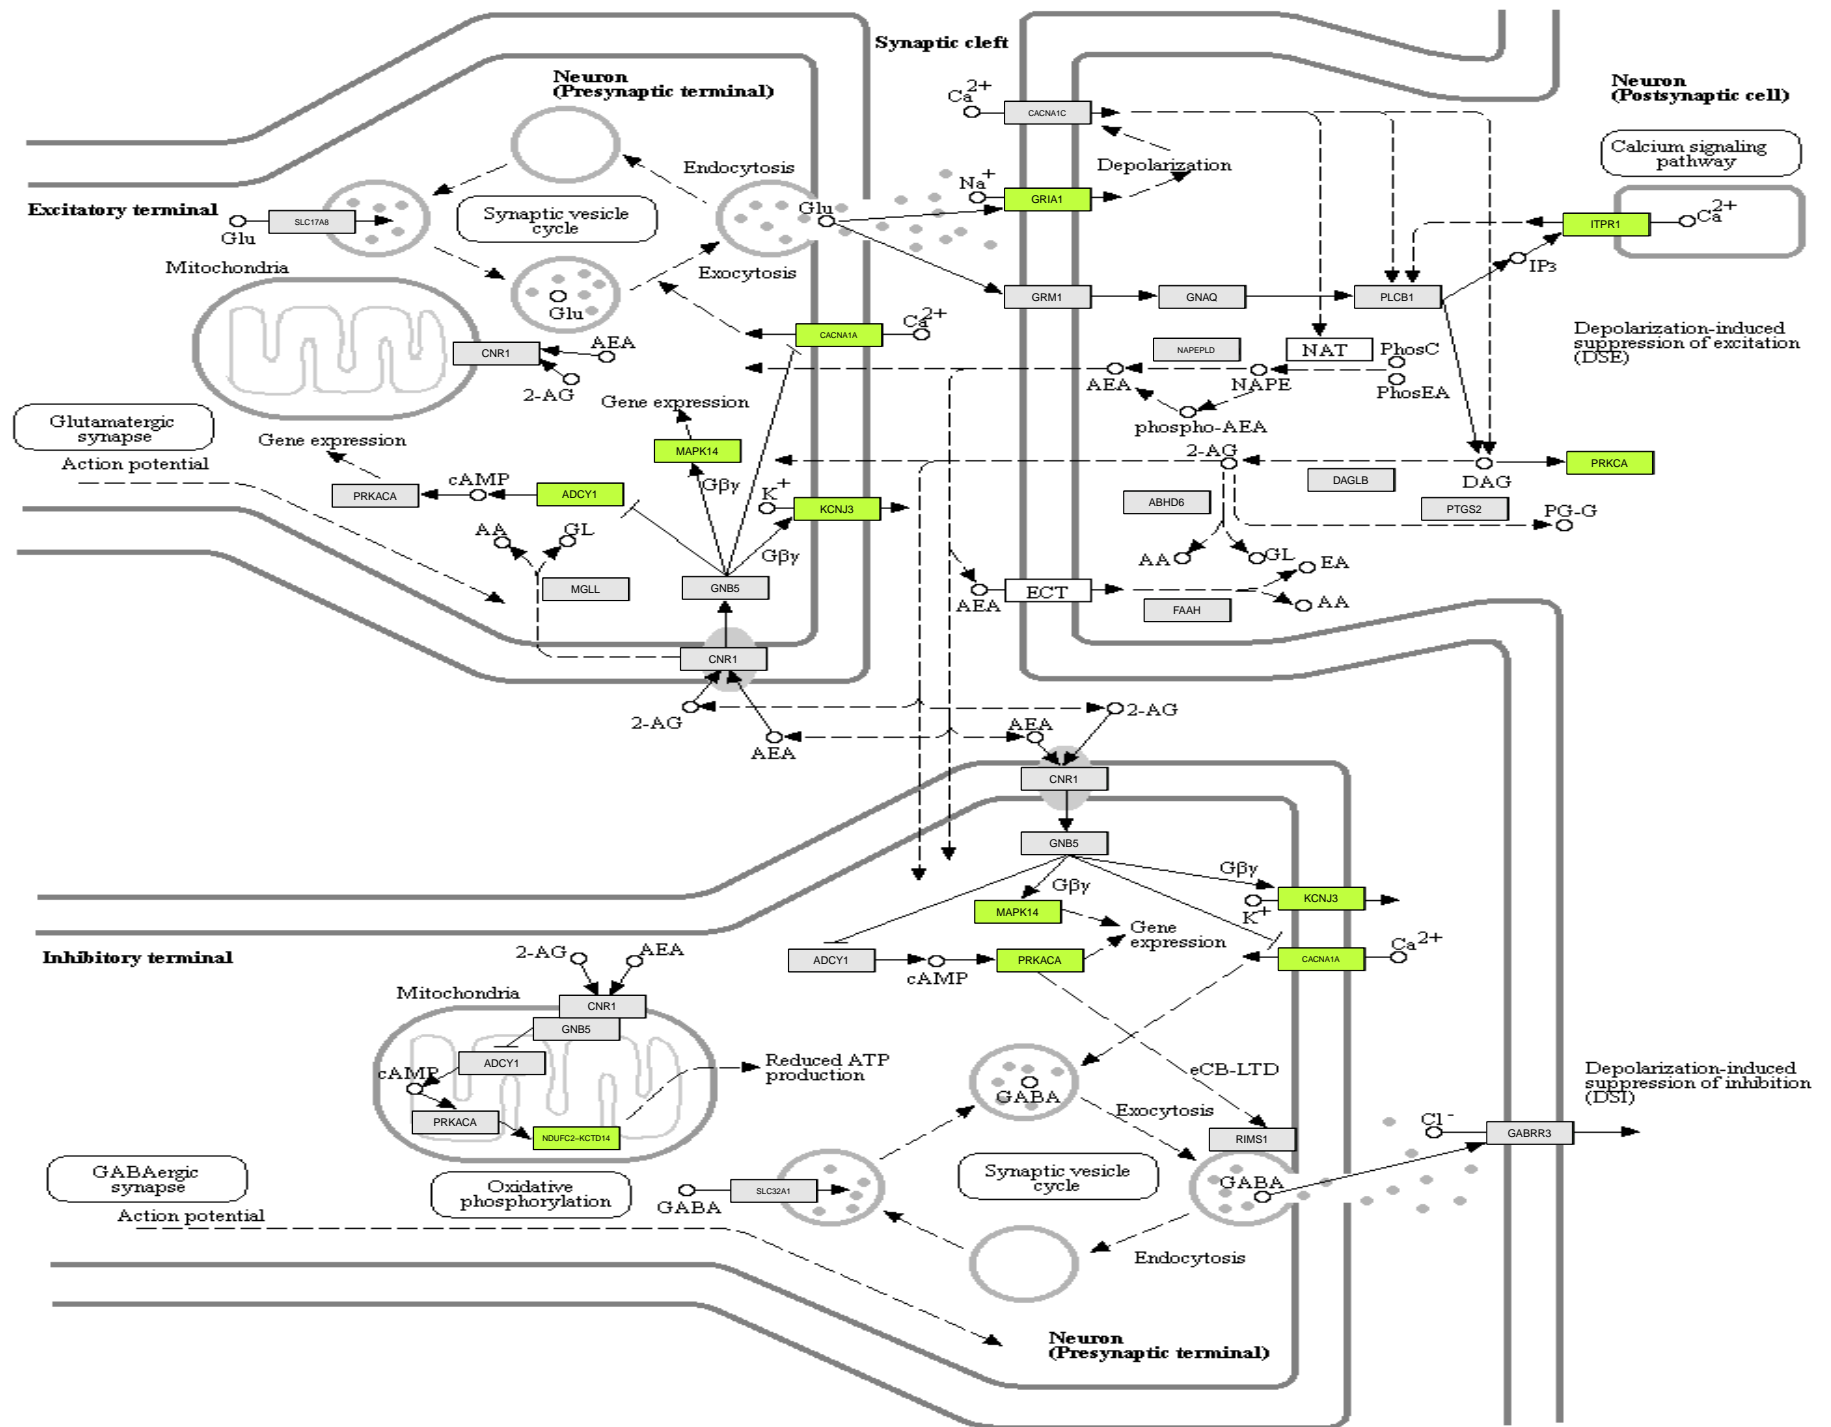

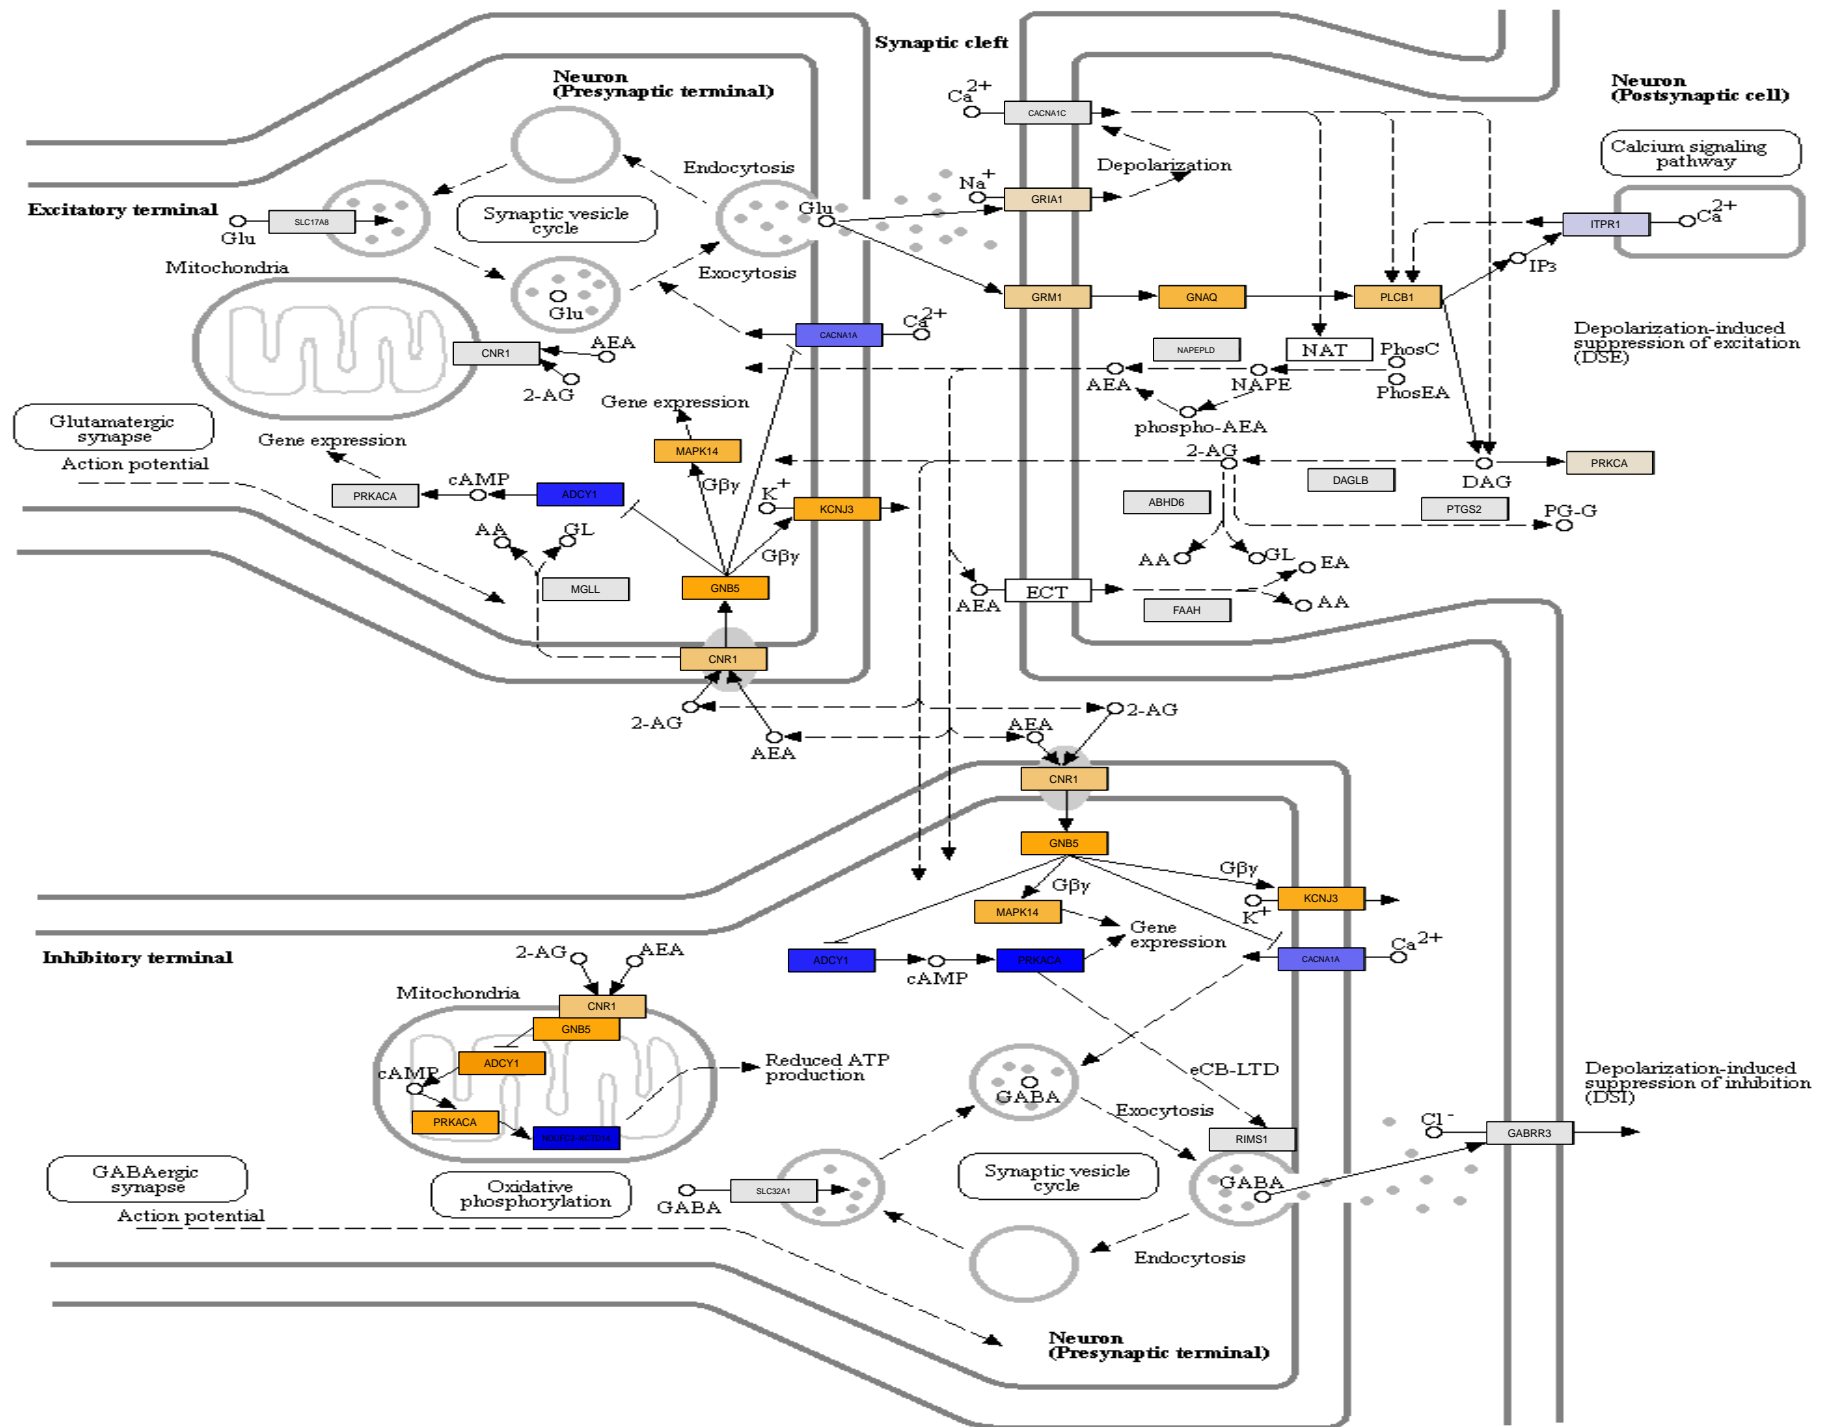

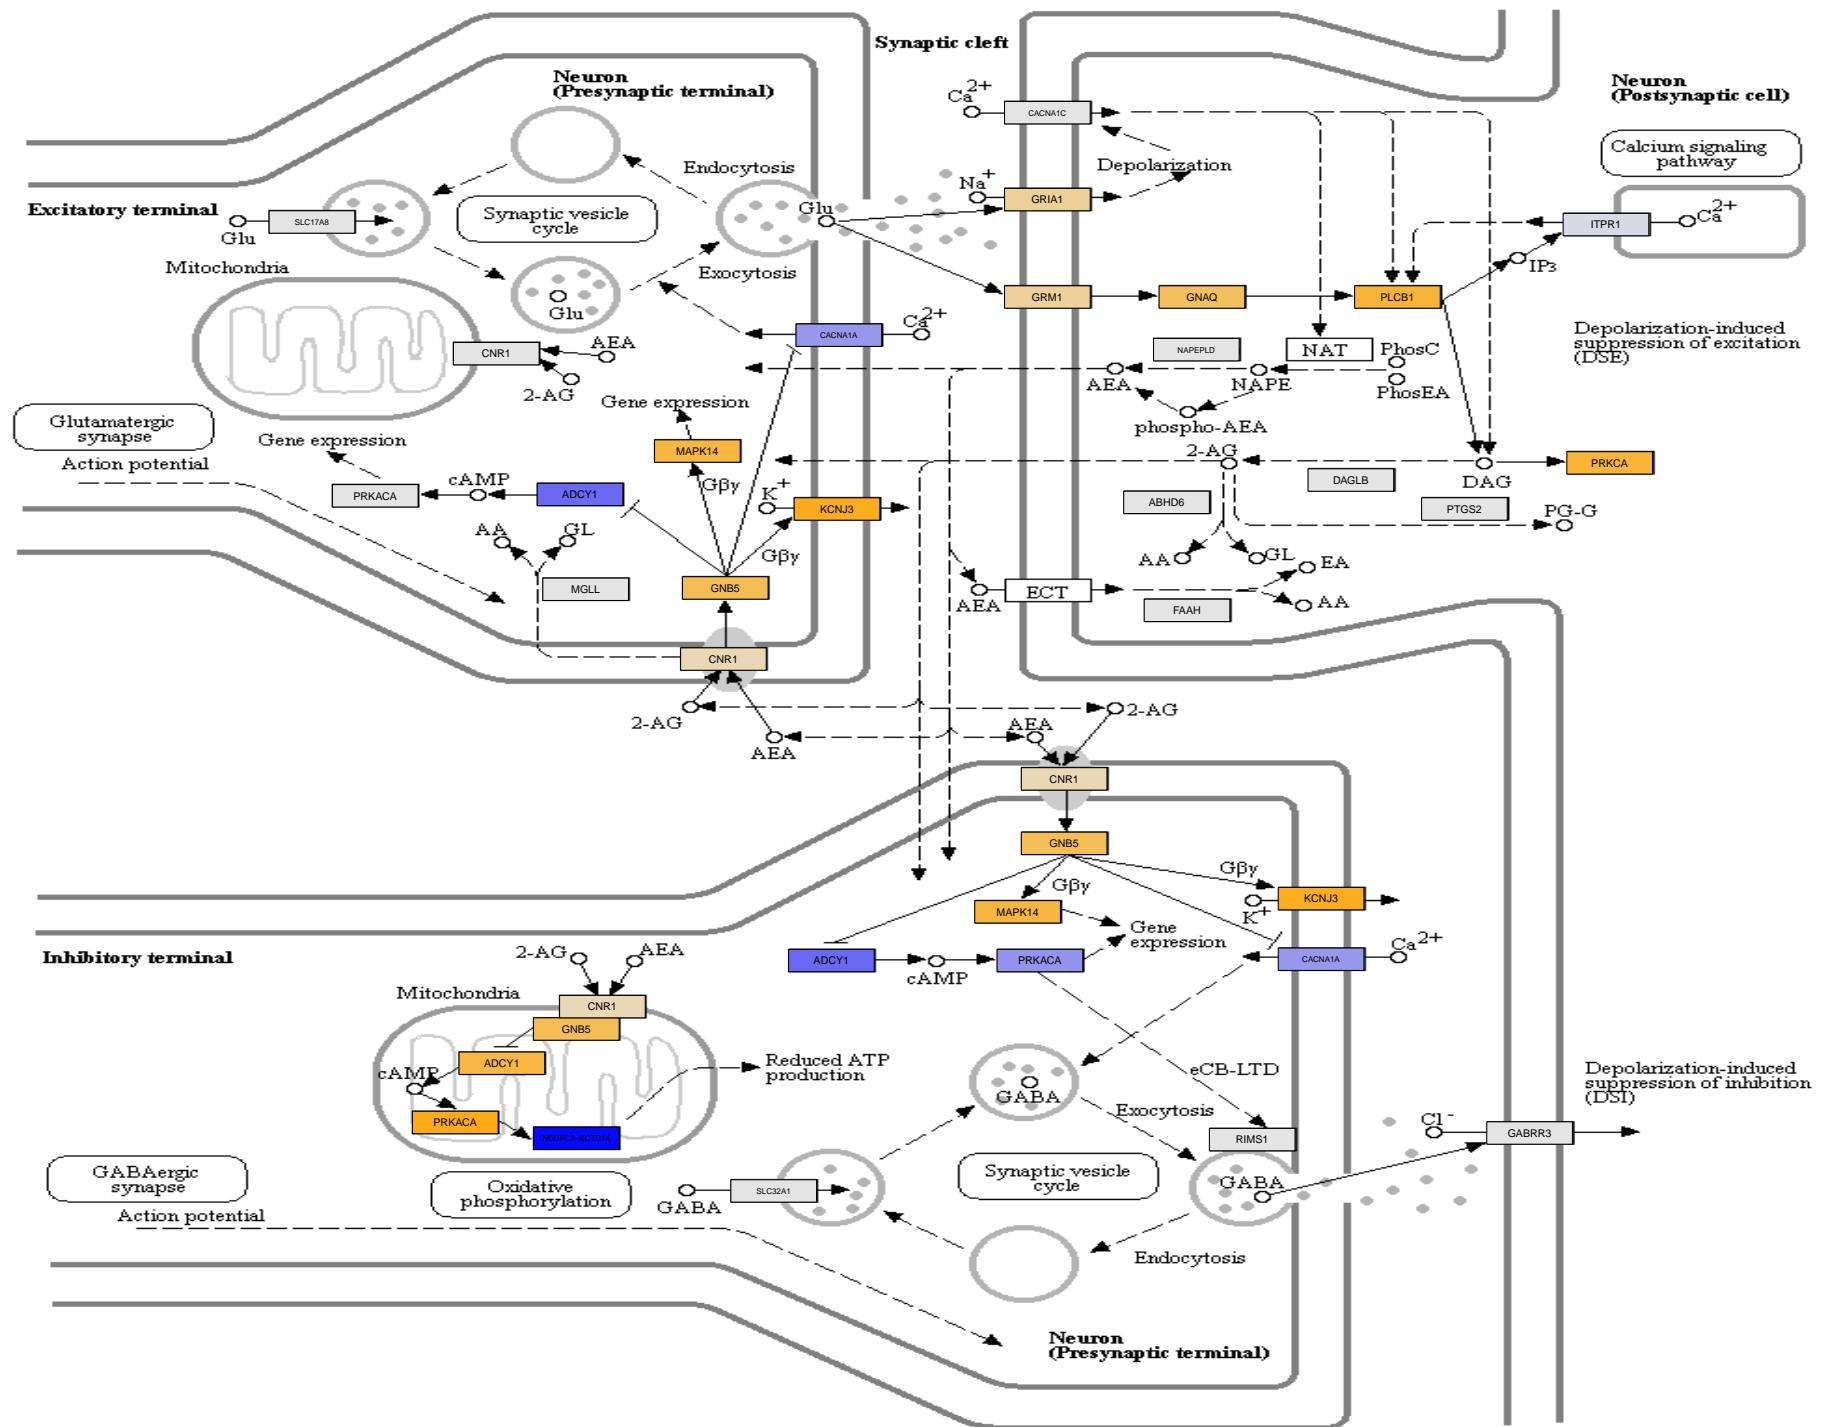

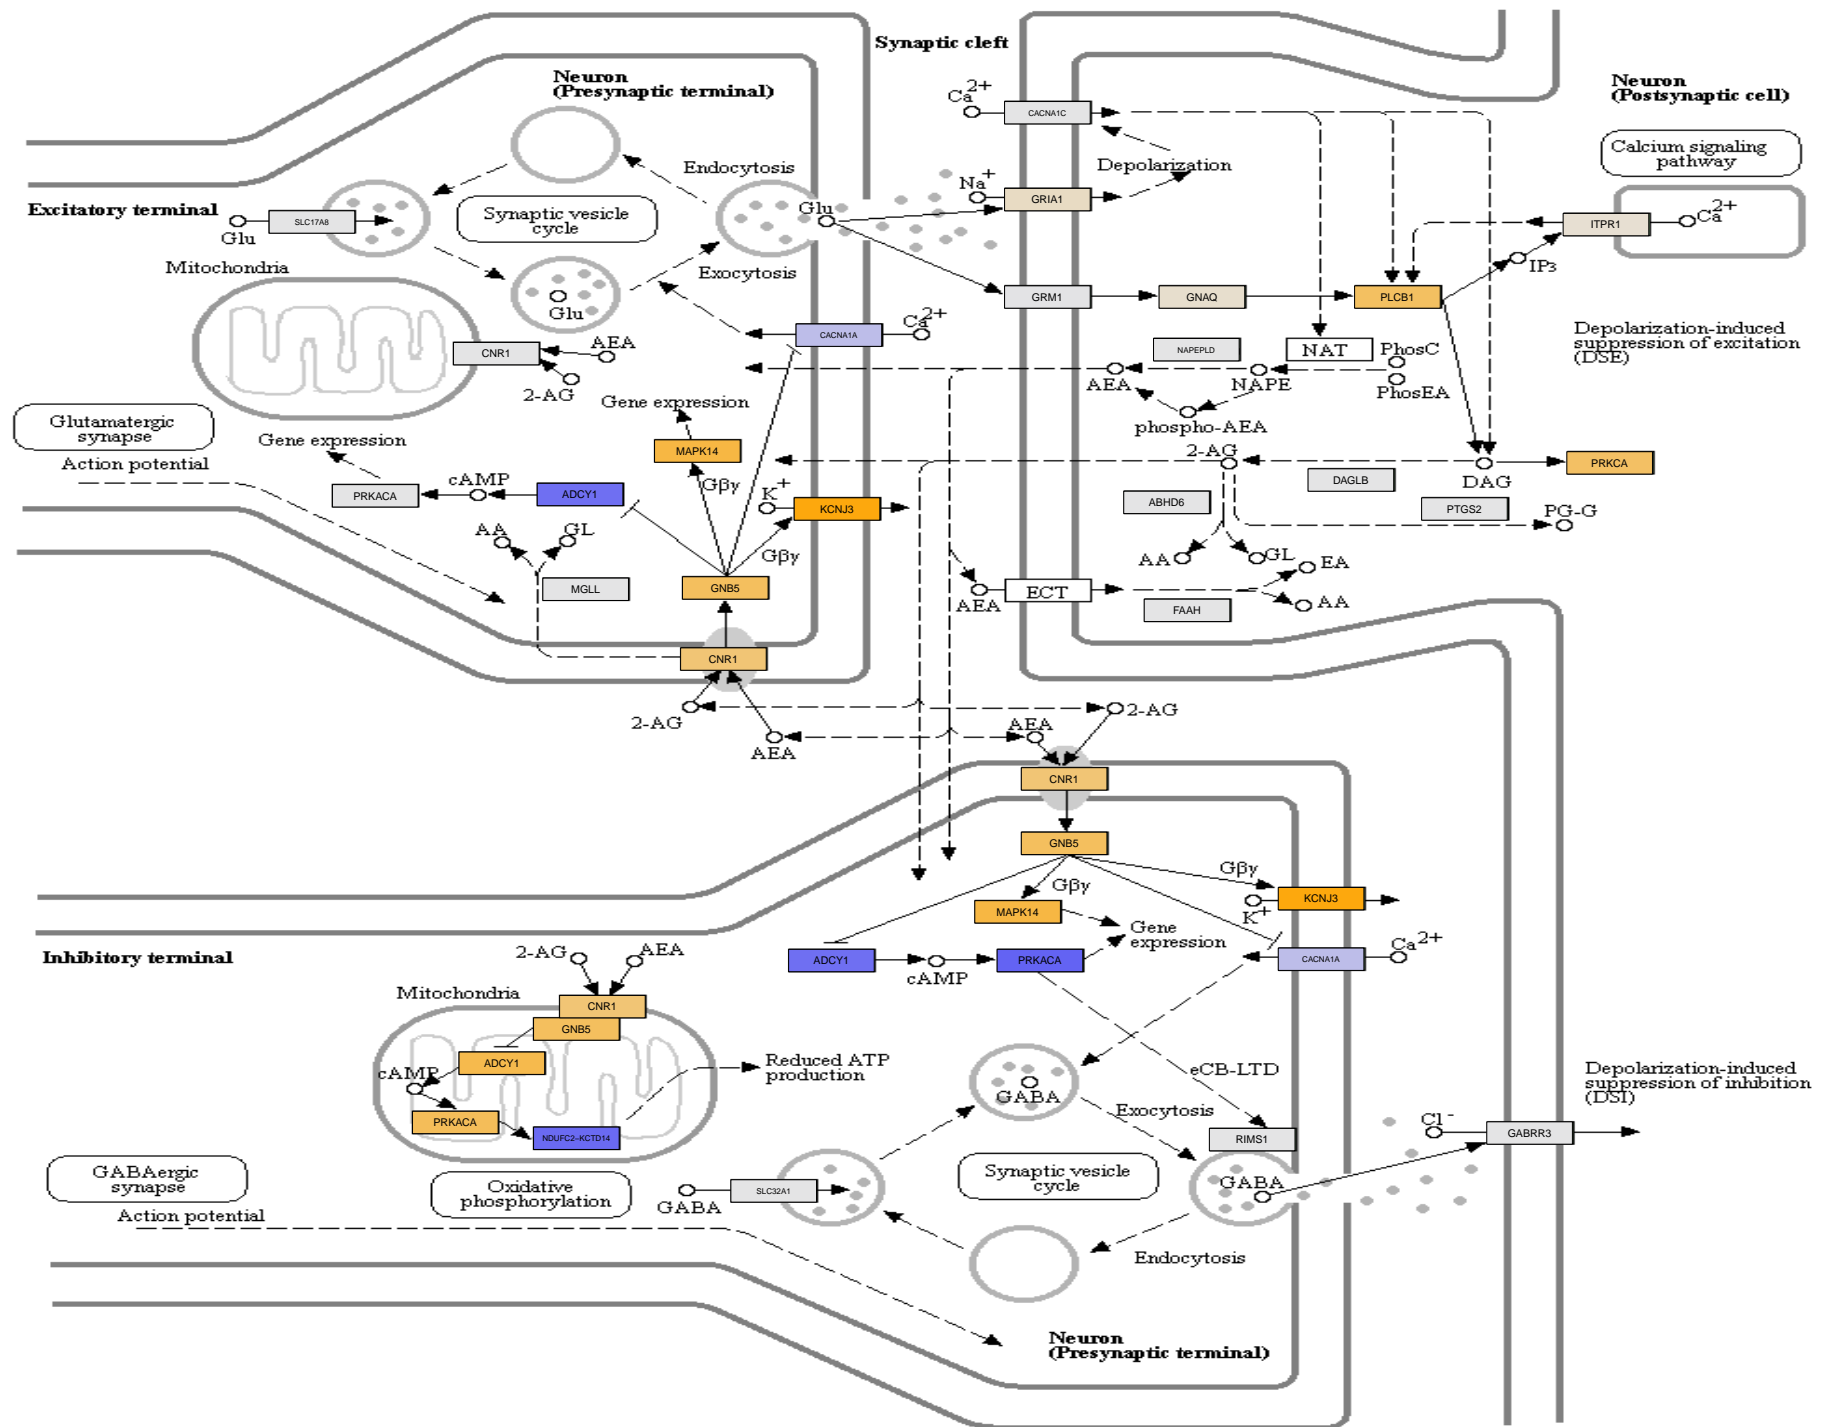

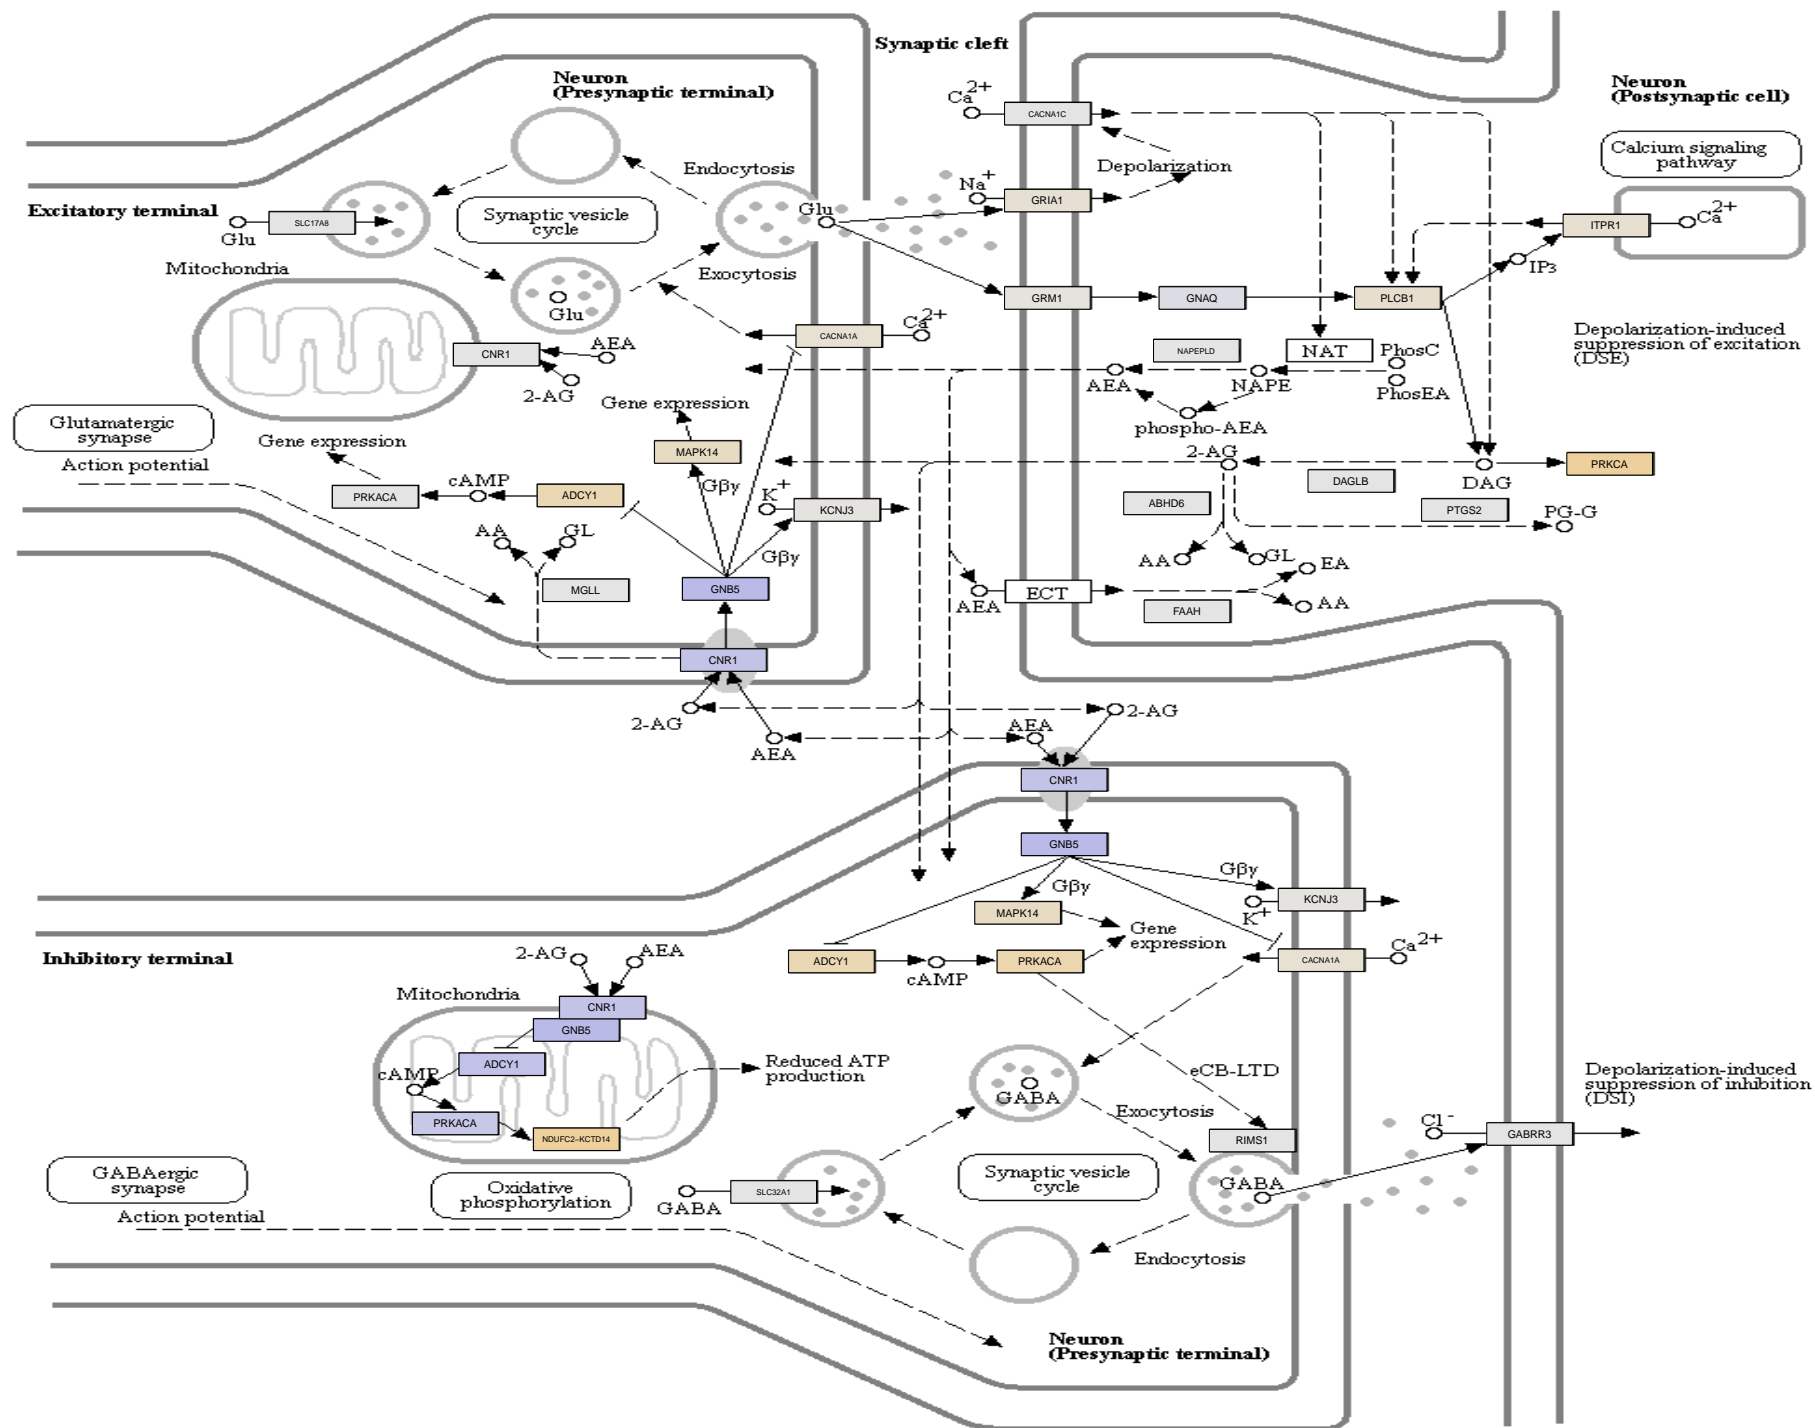

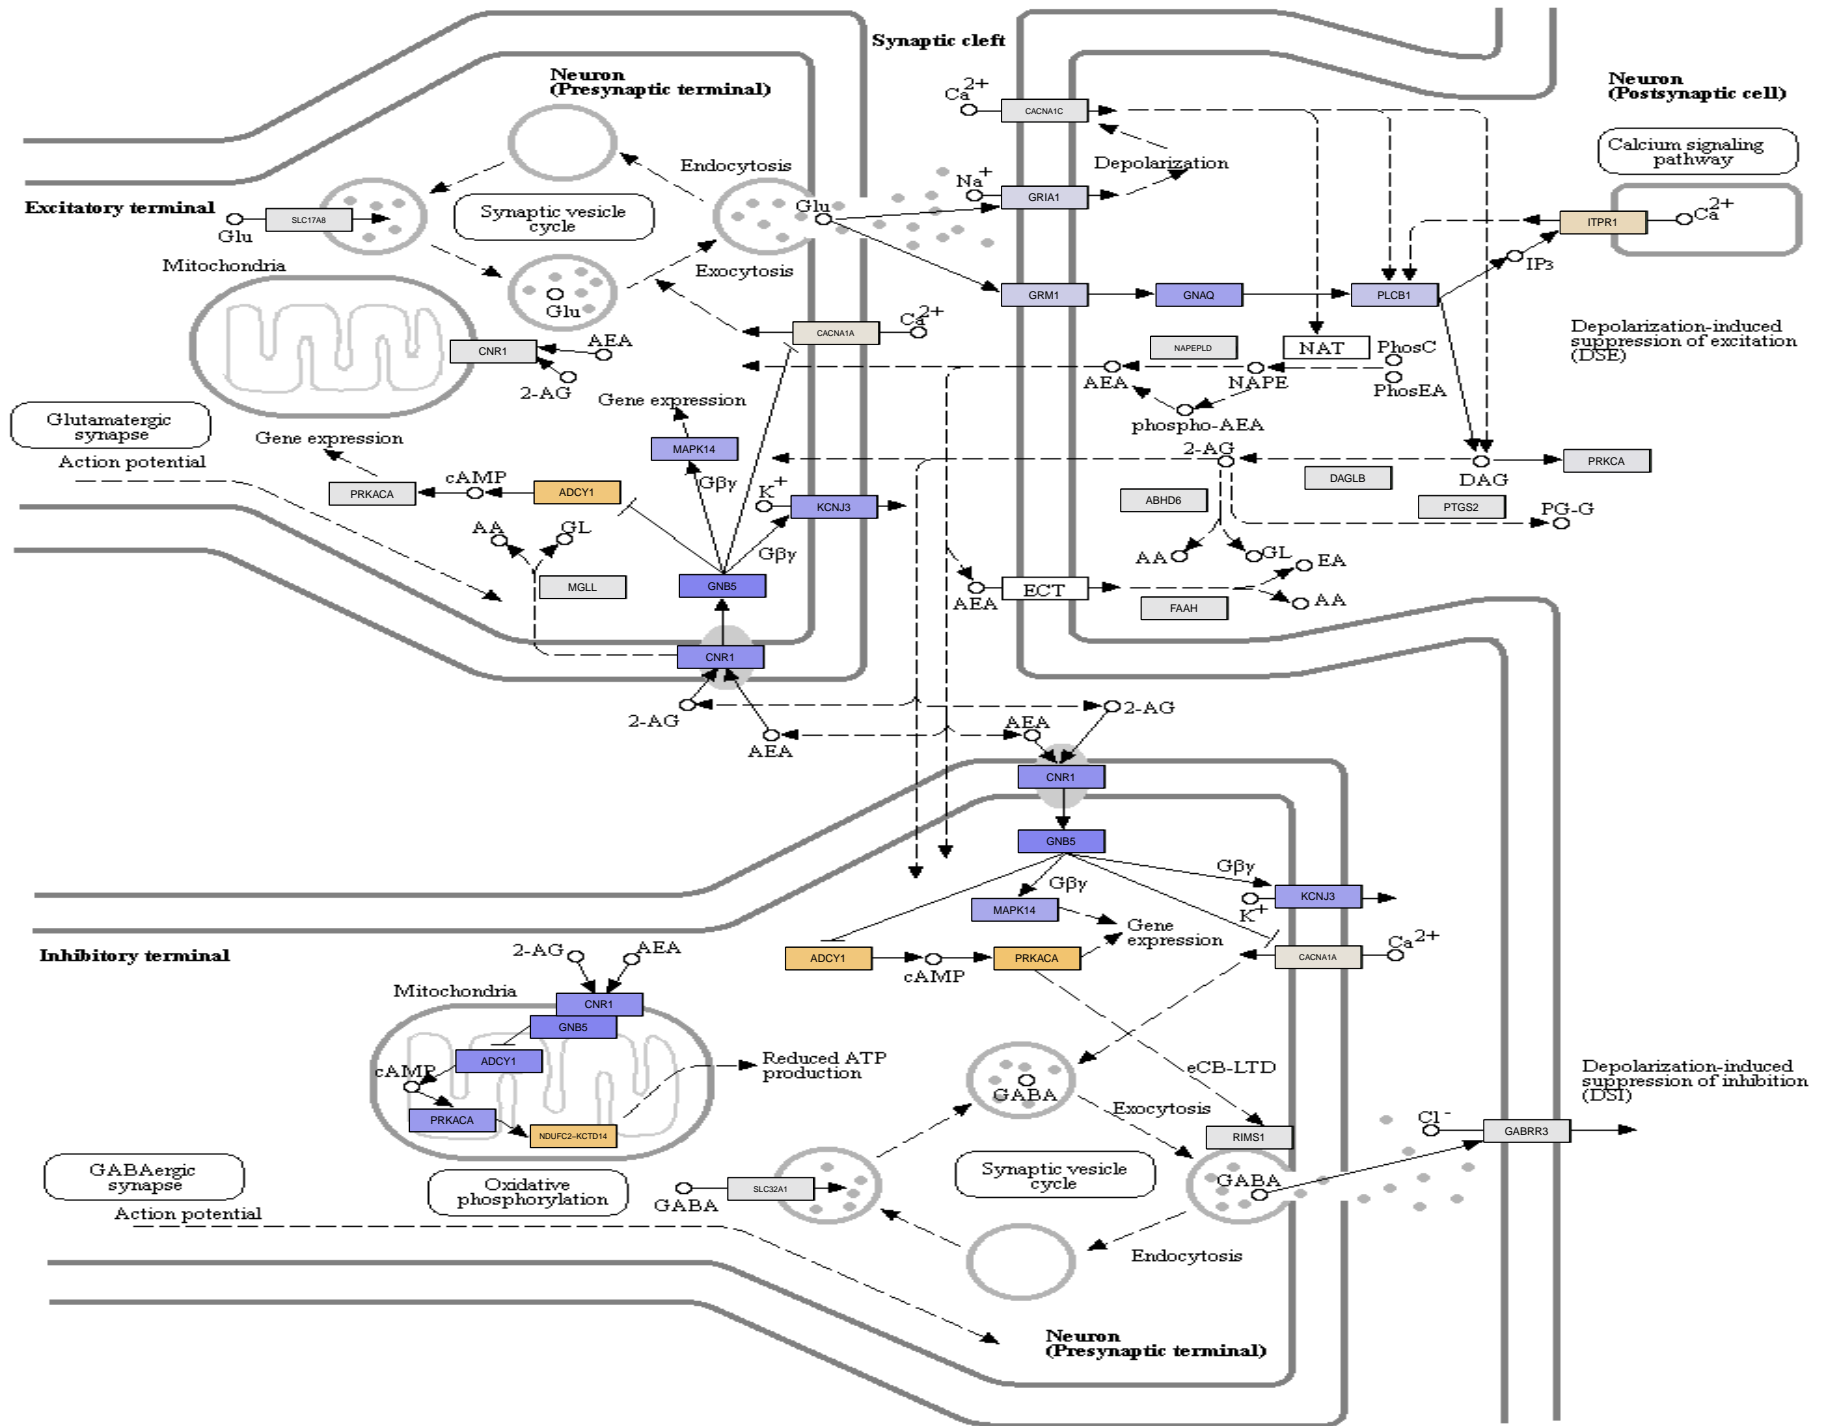



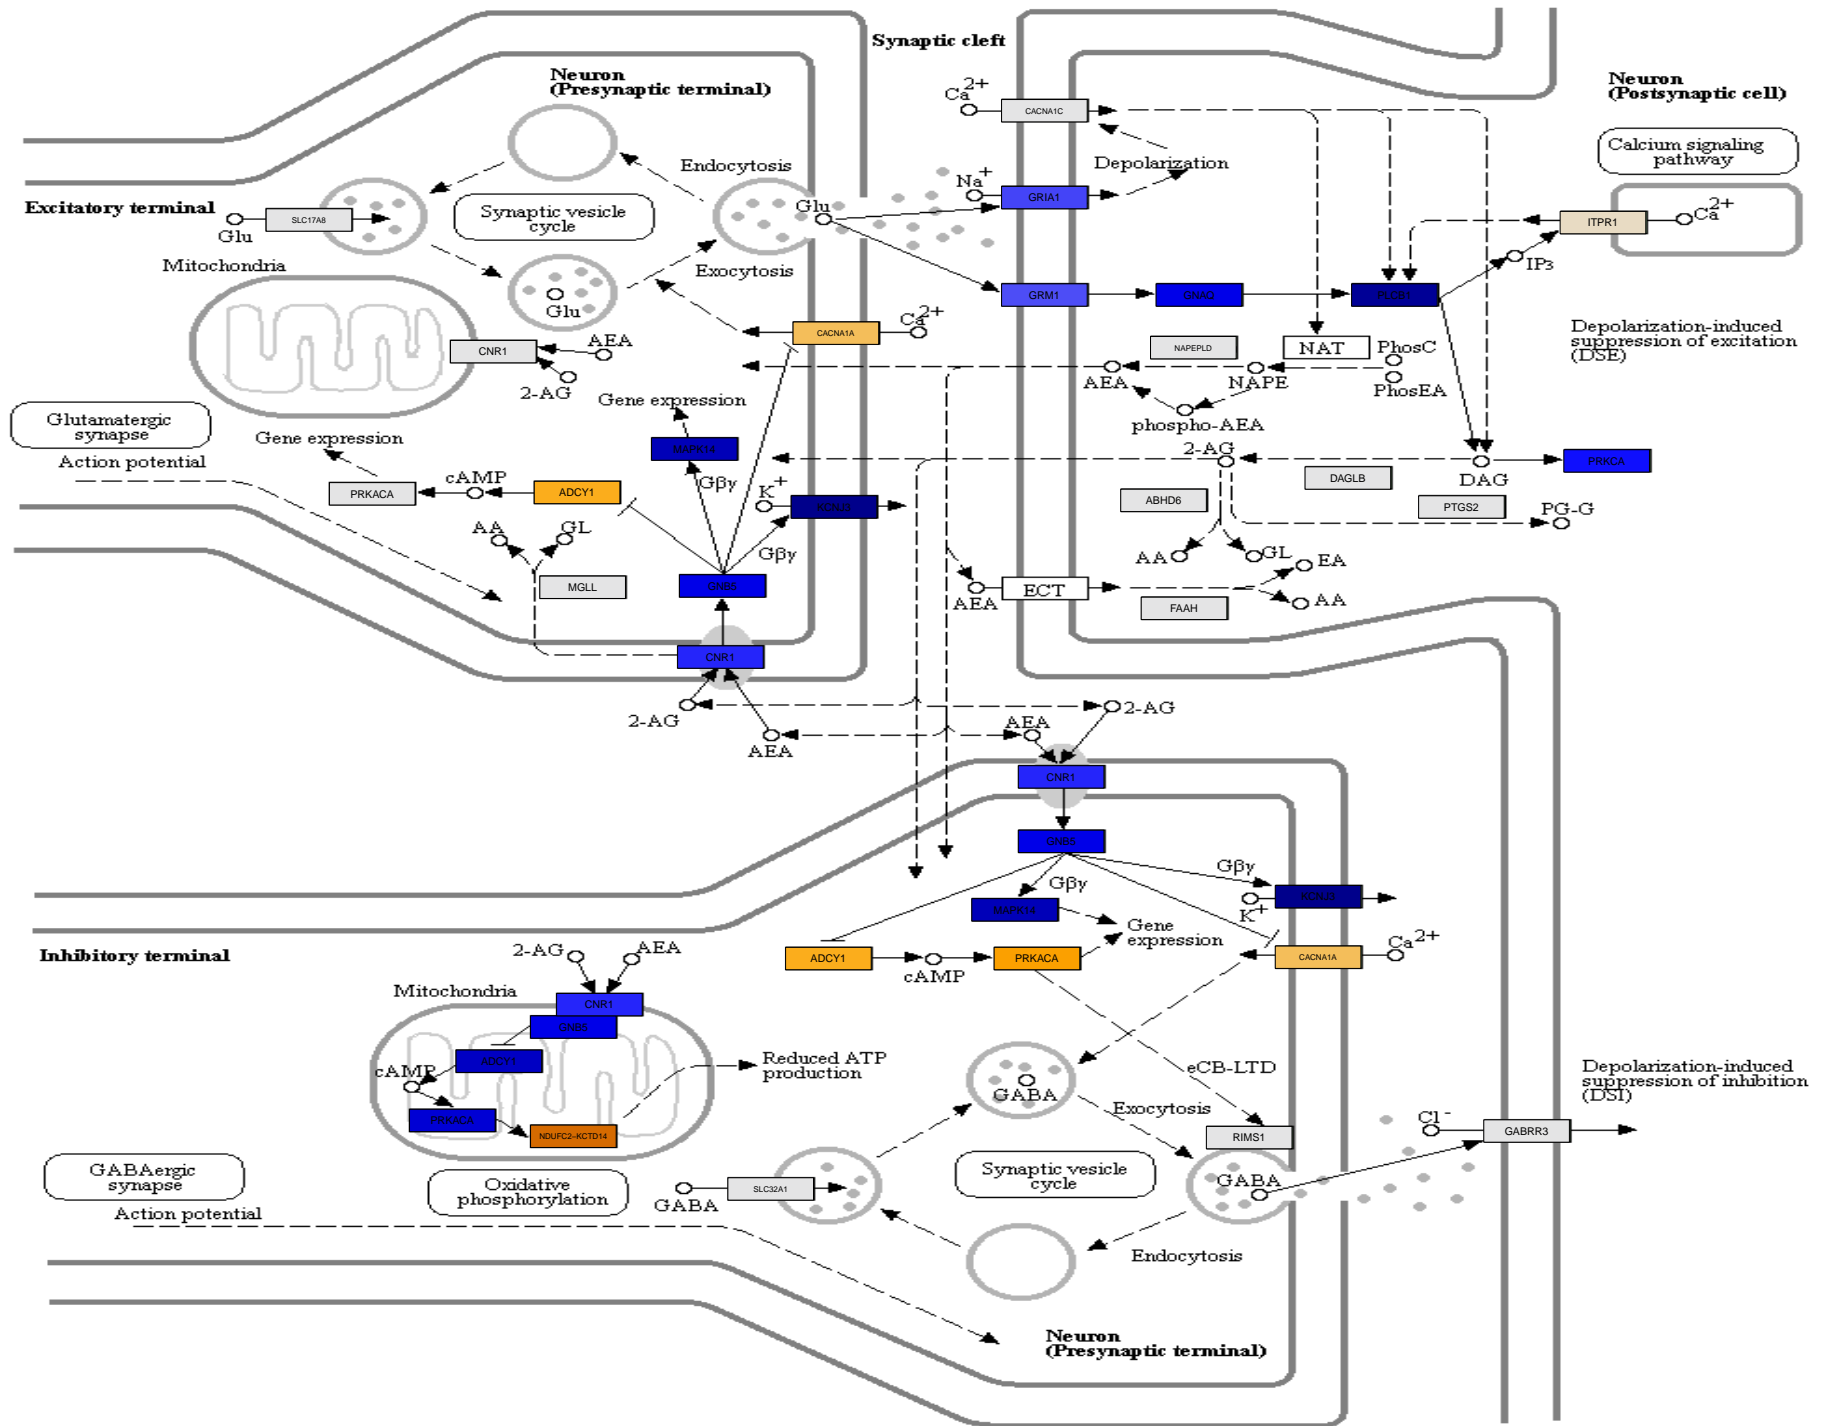

Supplement: s1 [file s1]

Wnt signaling pathway

all genes



maximum = -Inf

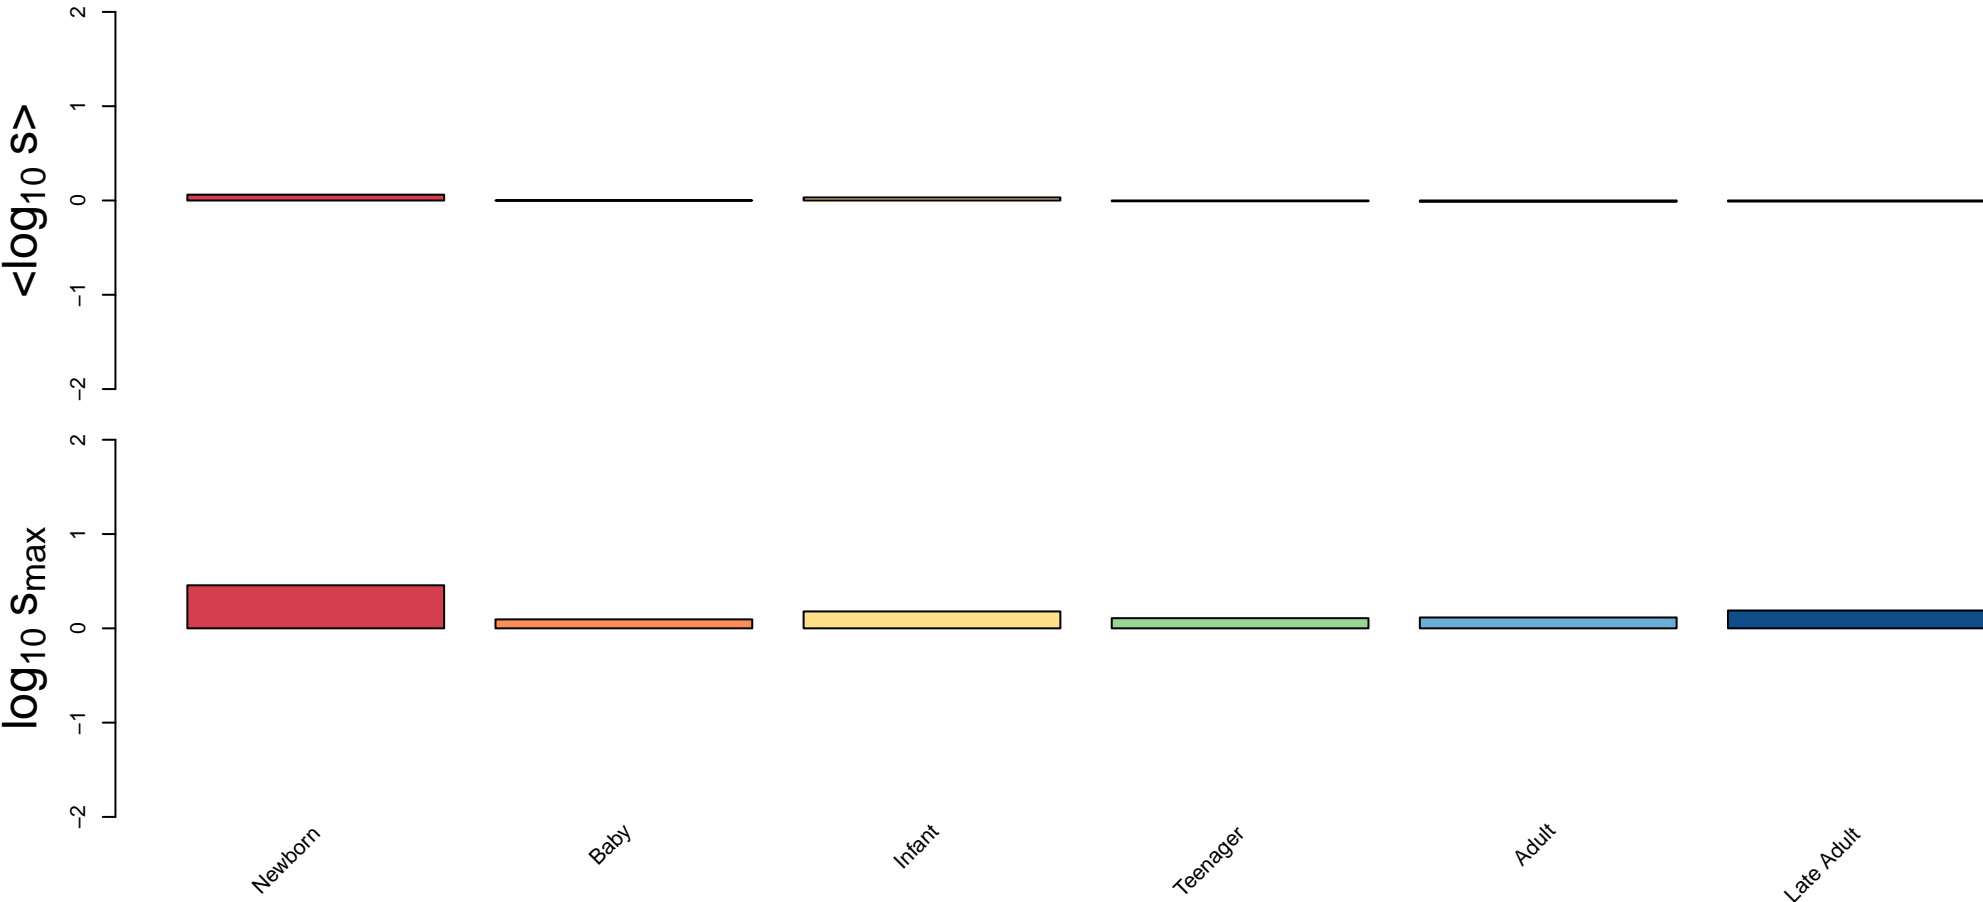

Wnt\_signaling\_pathway  
genes with data





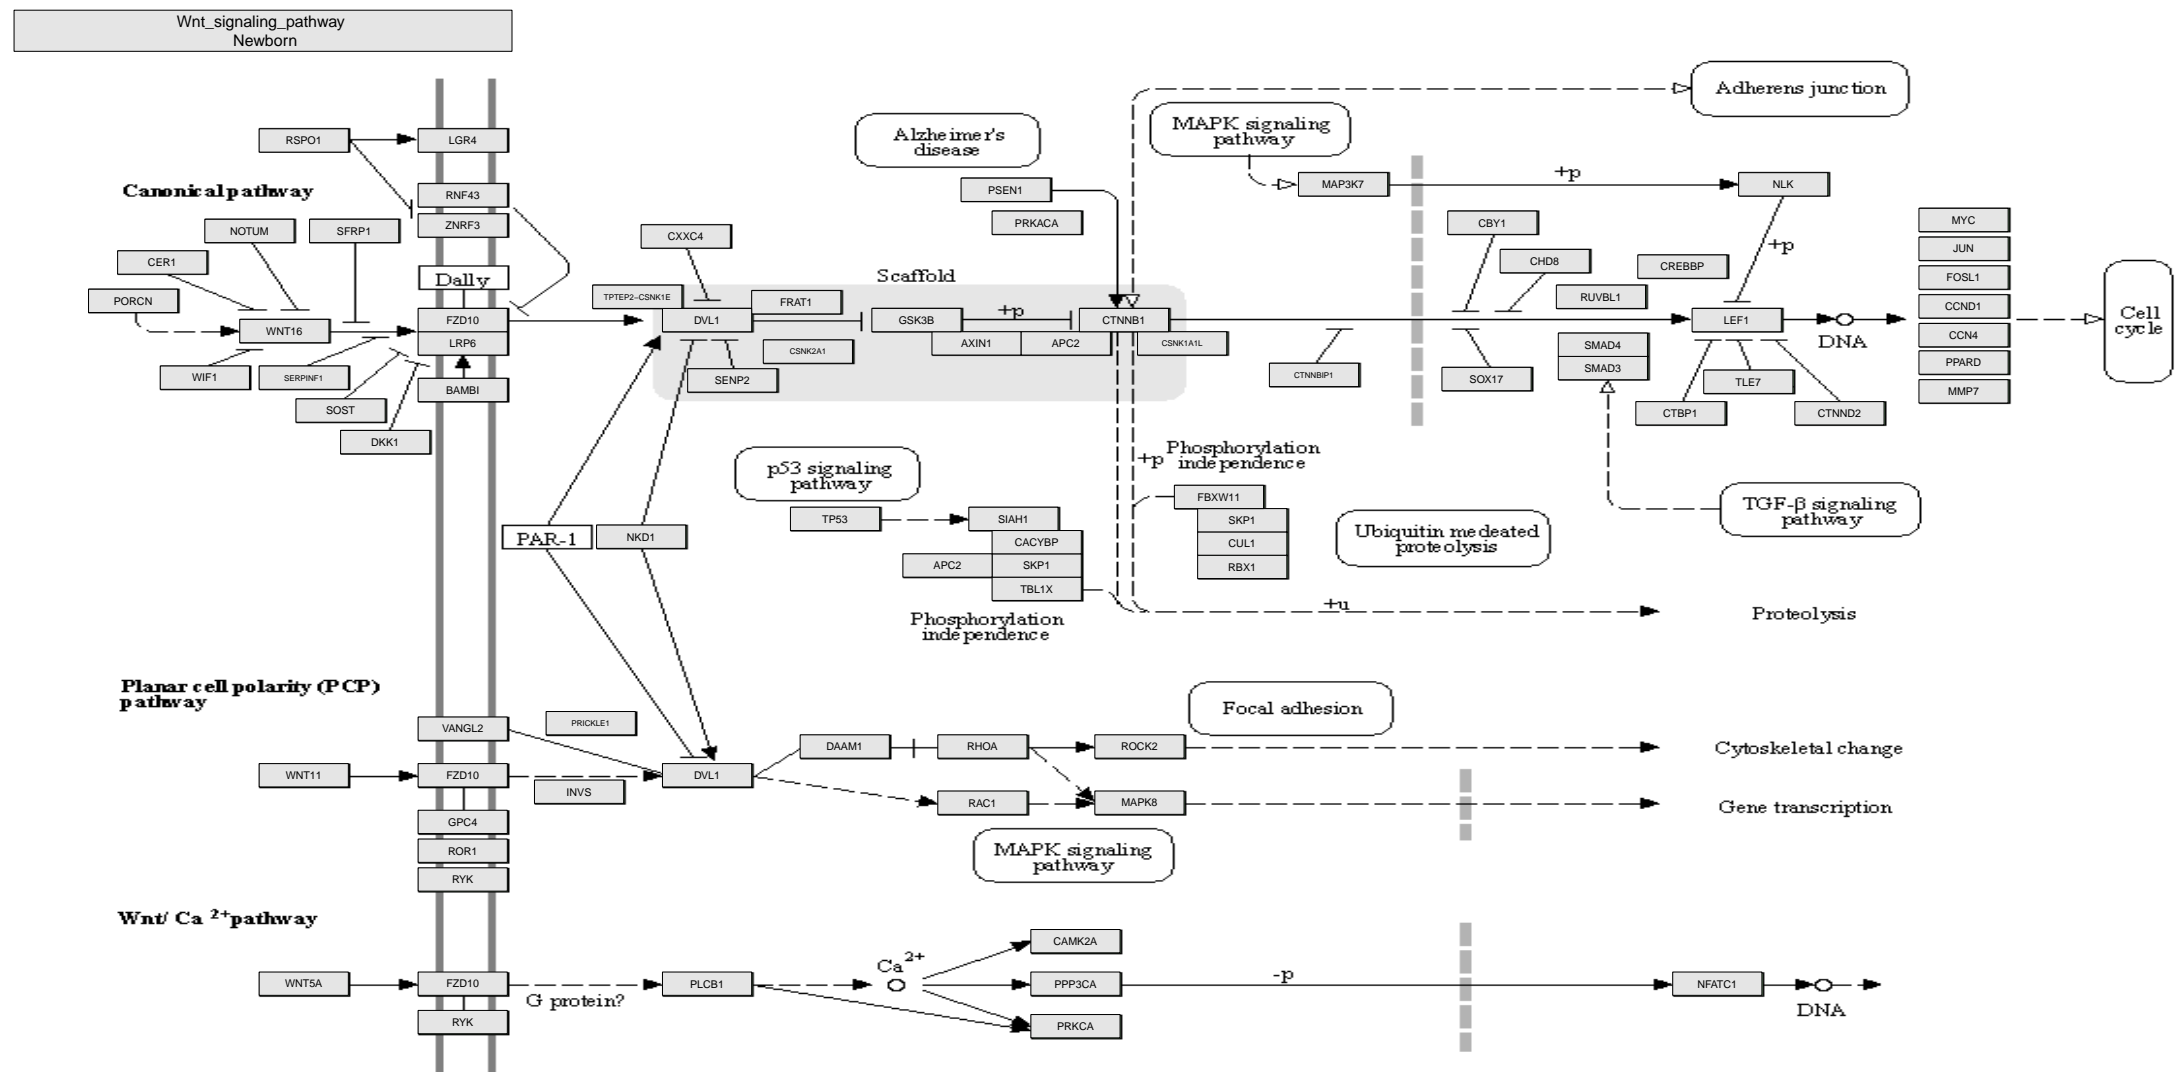









Supplement: s1 [file s1]

mean signal

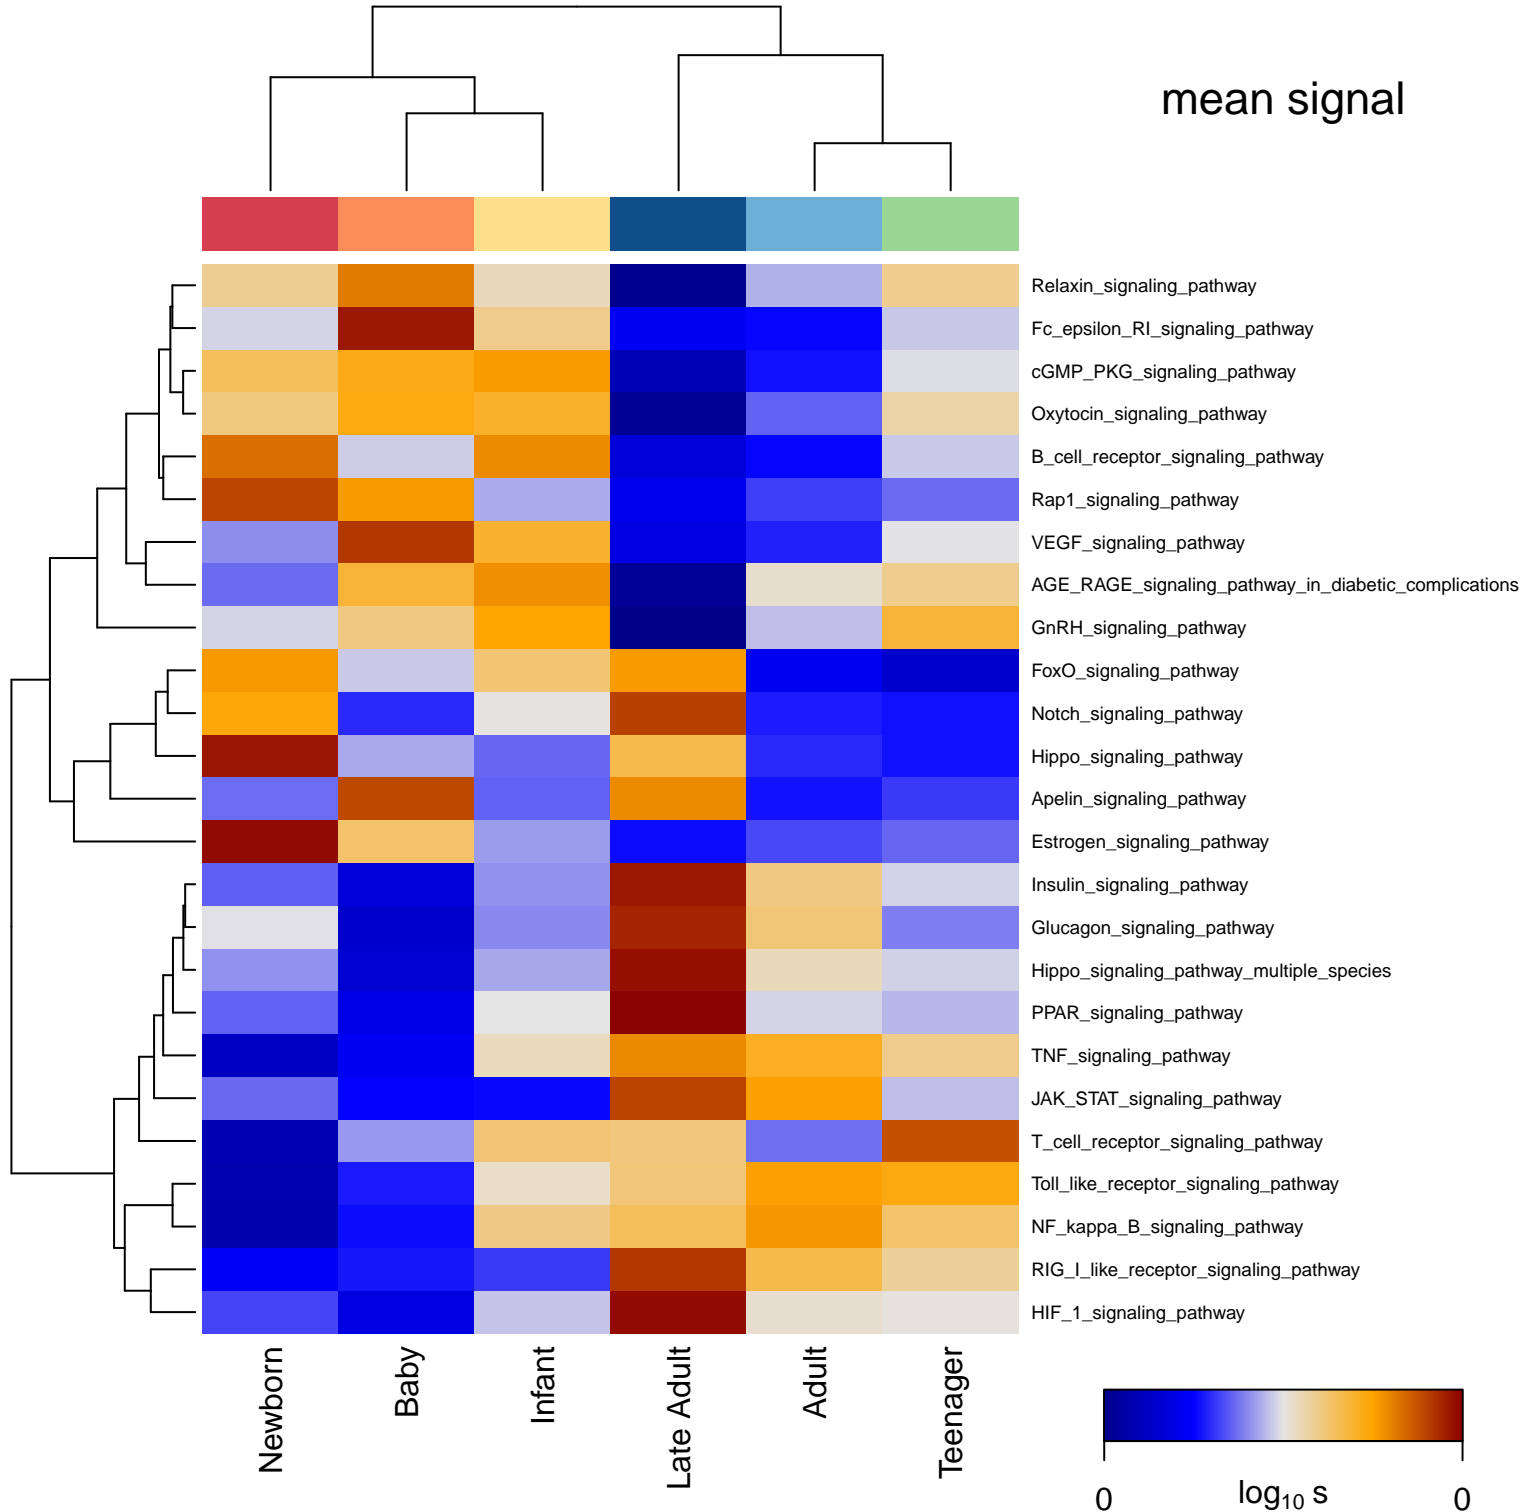

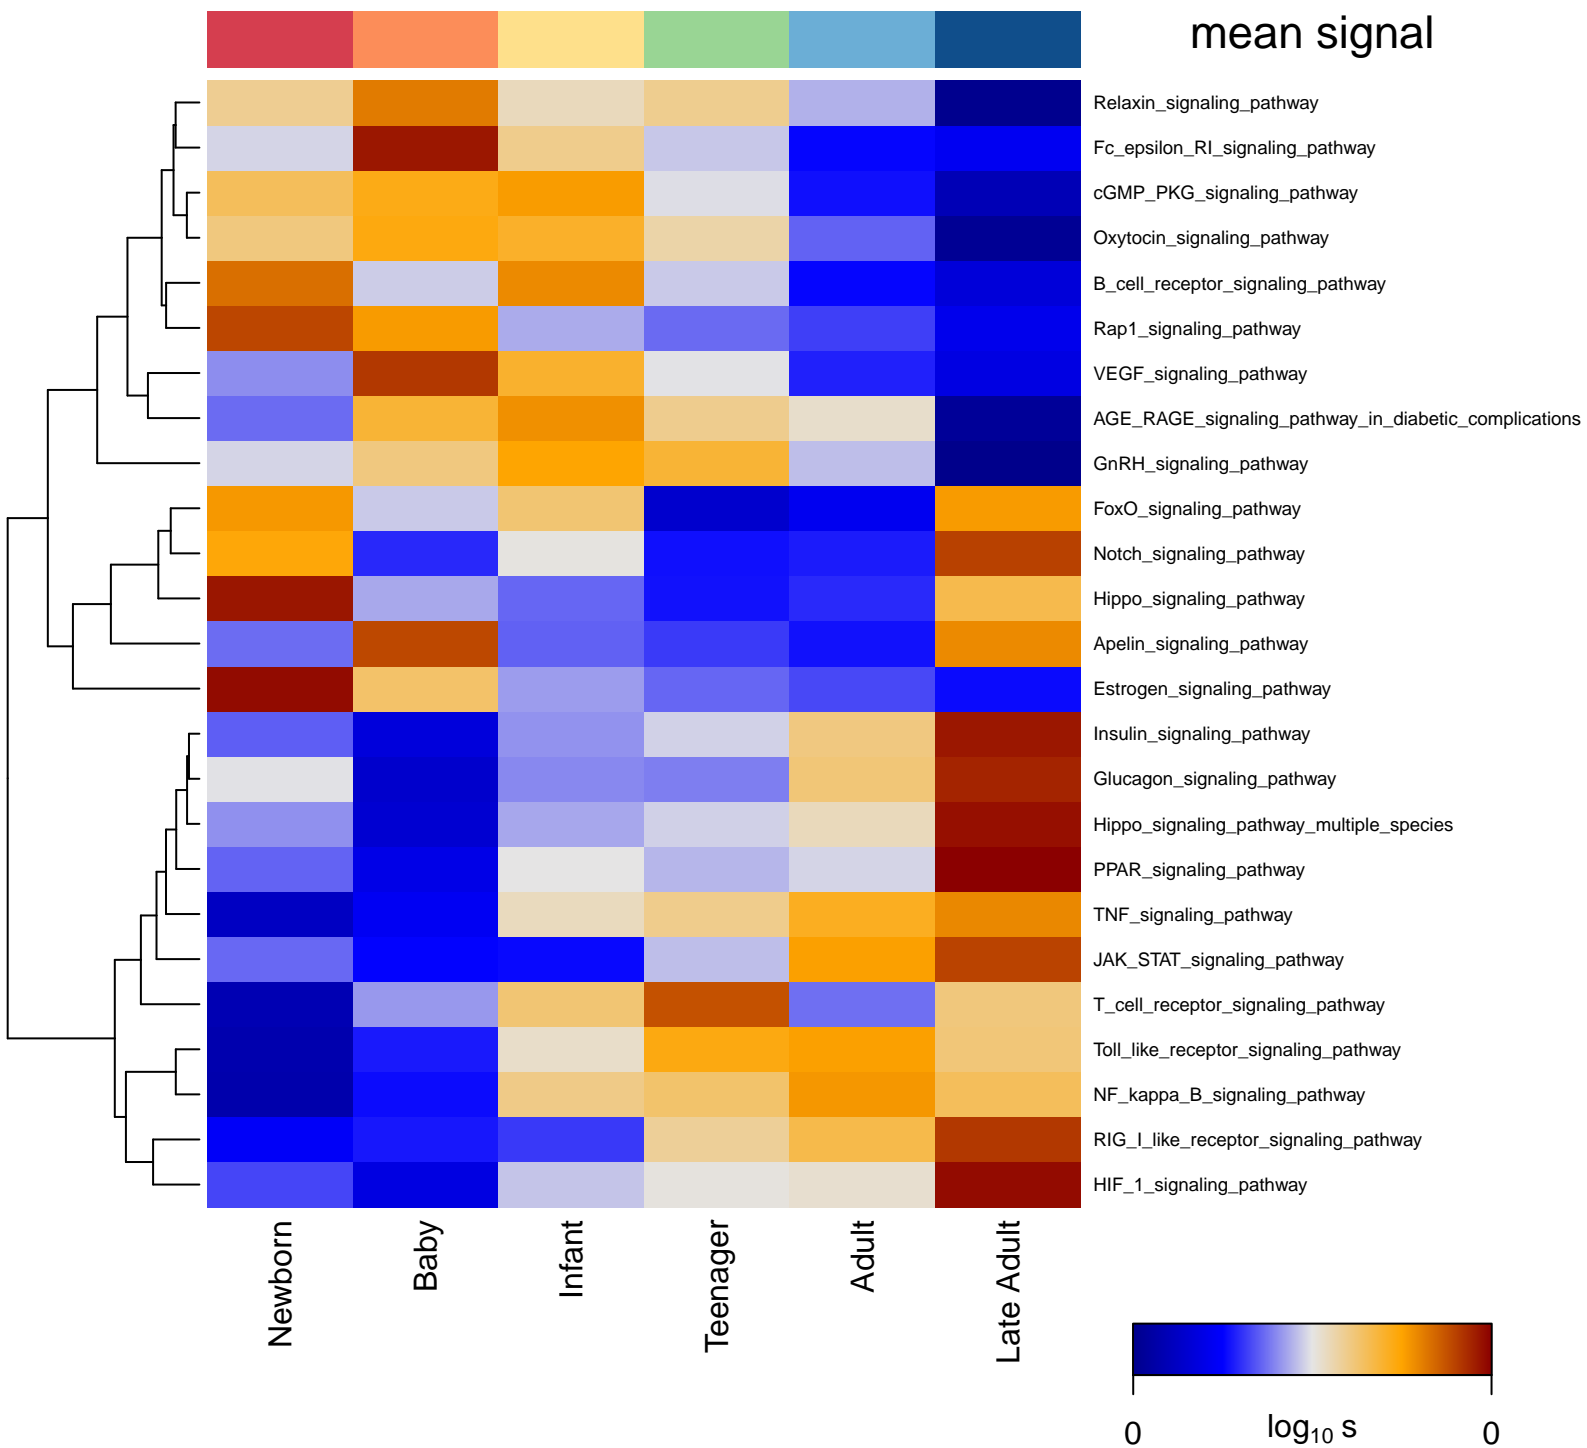

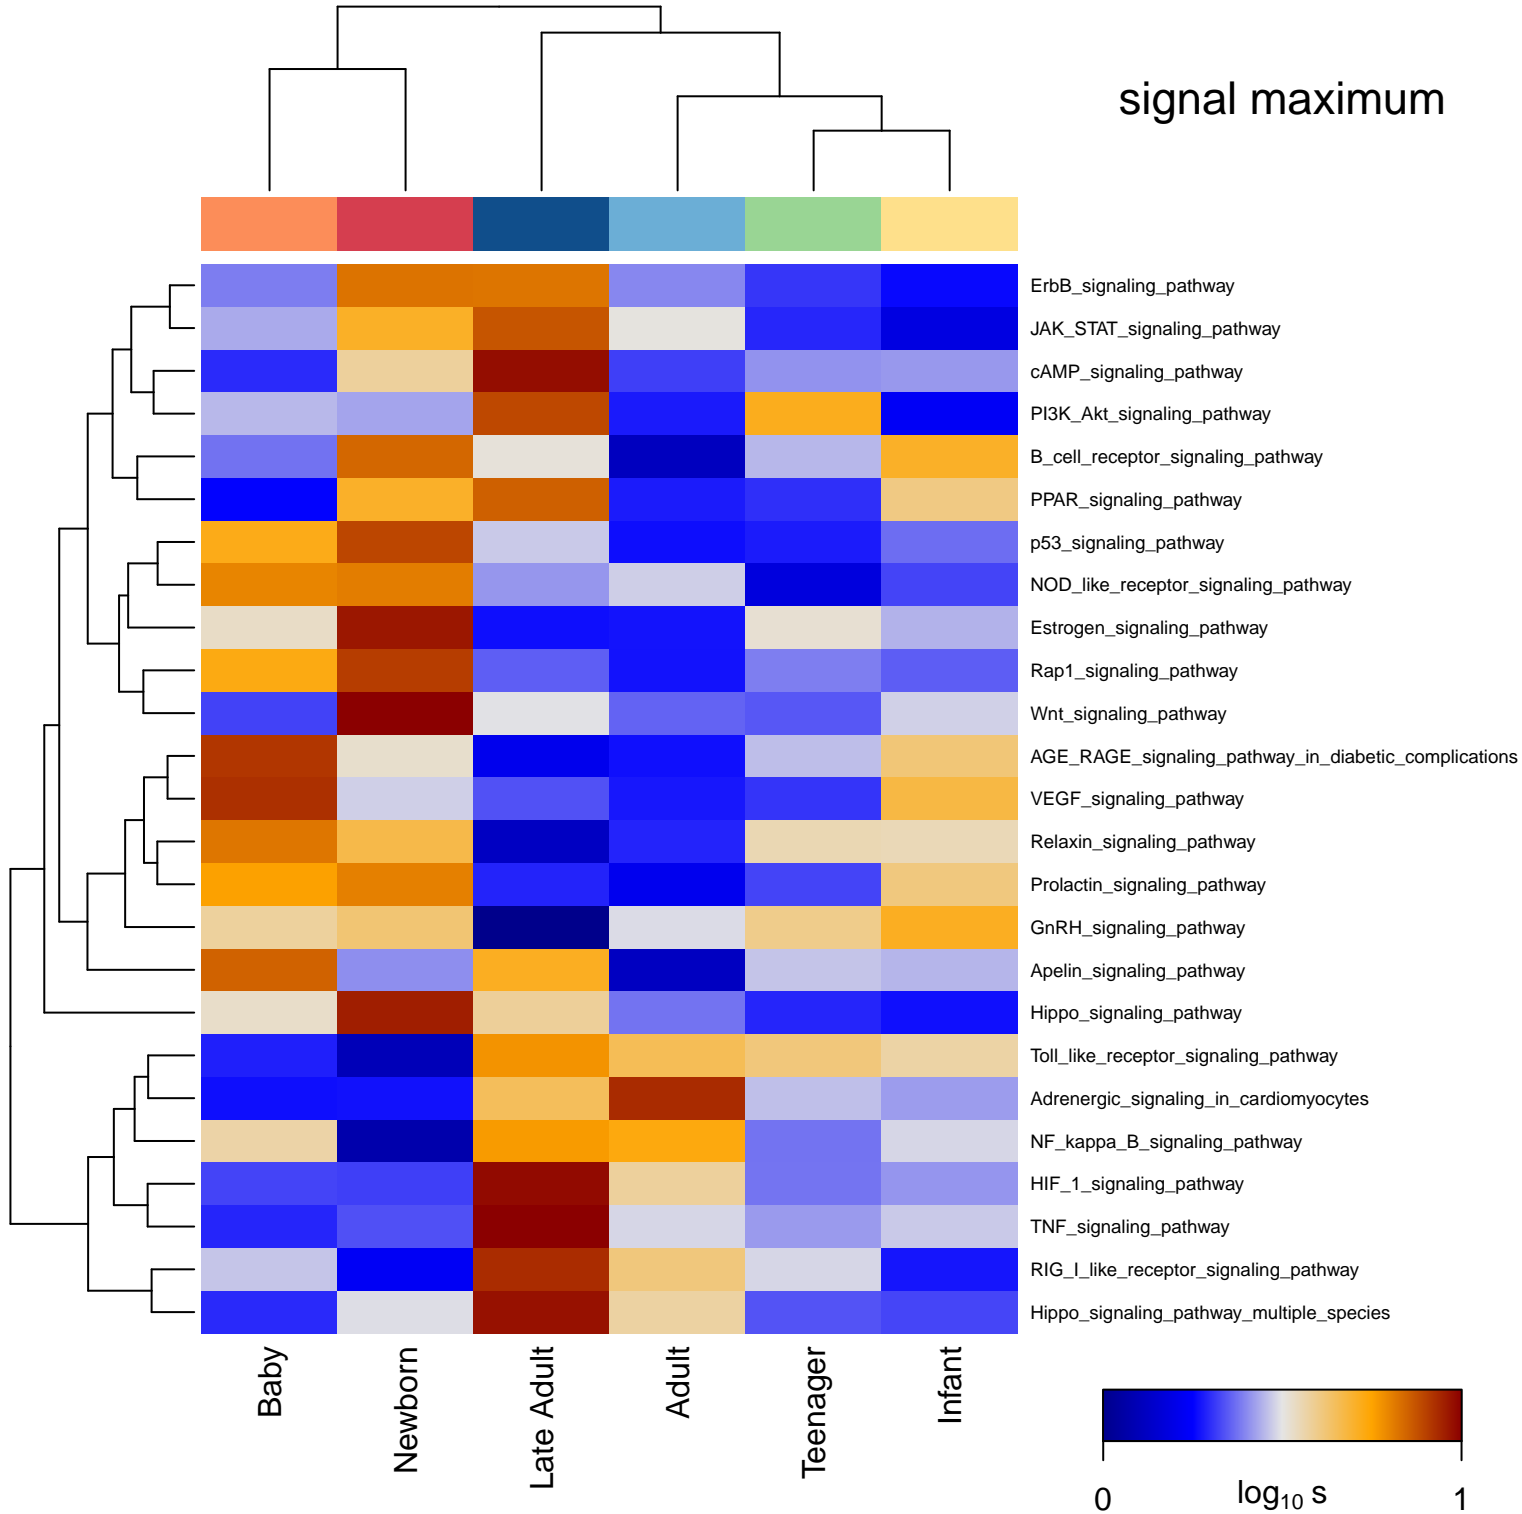

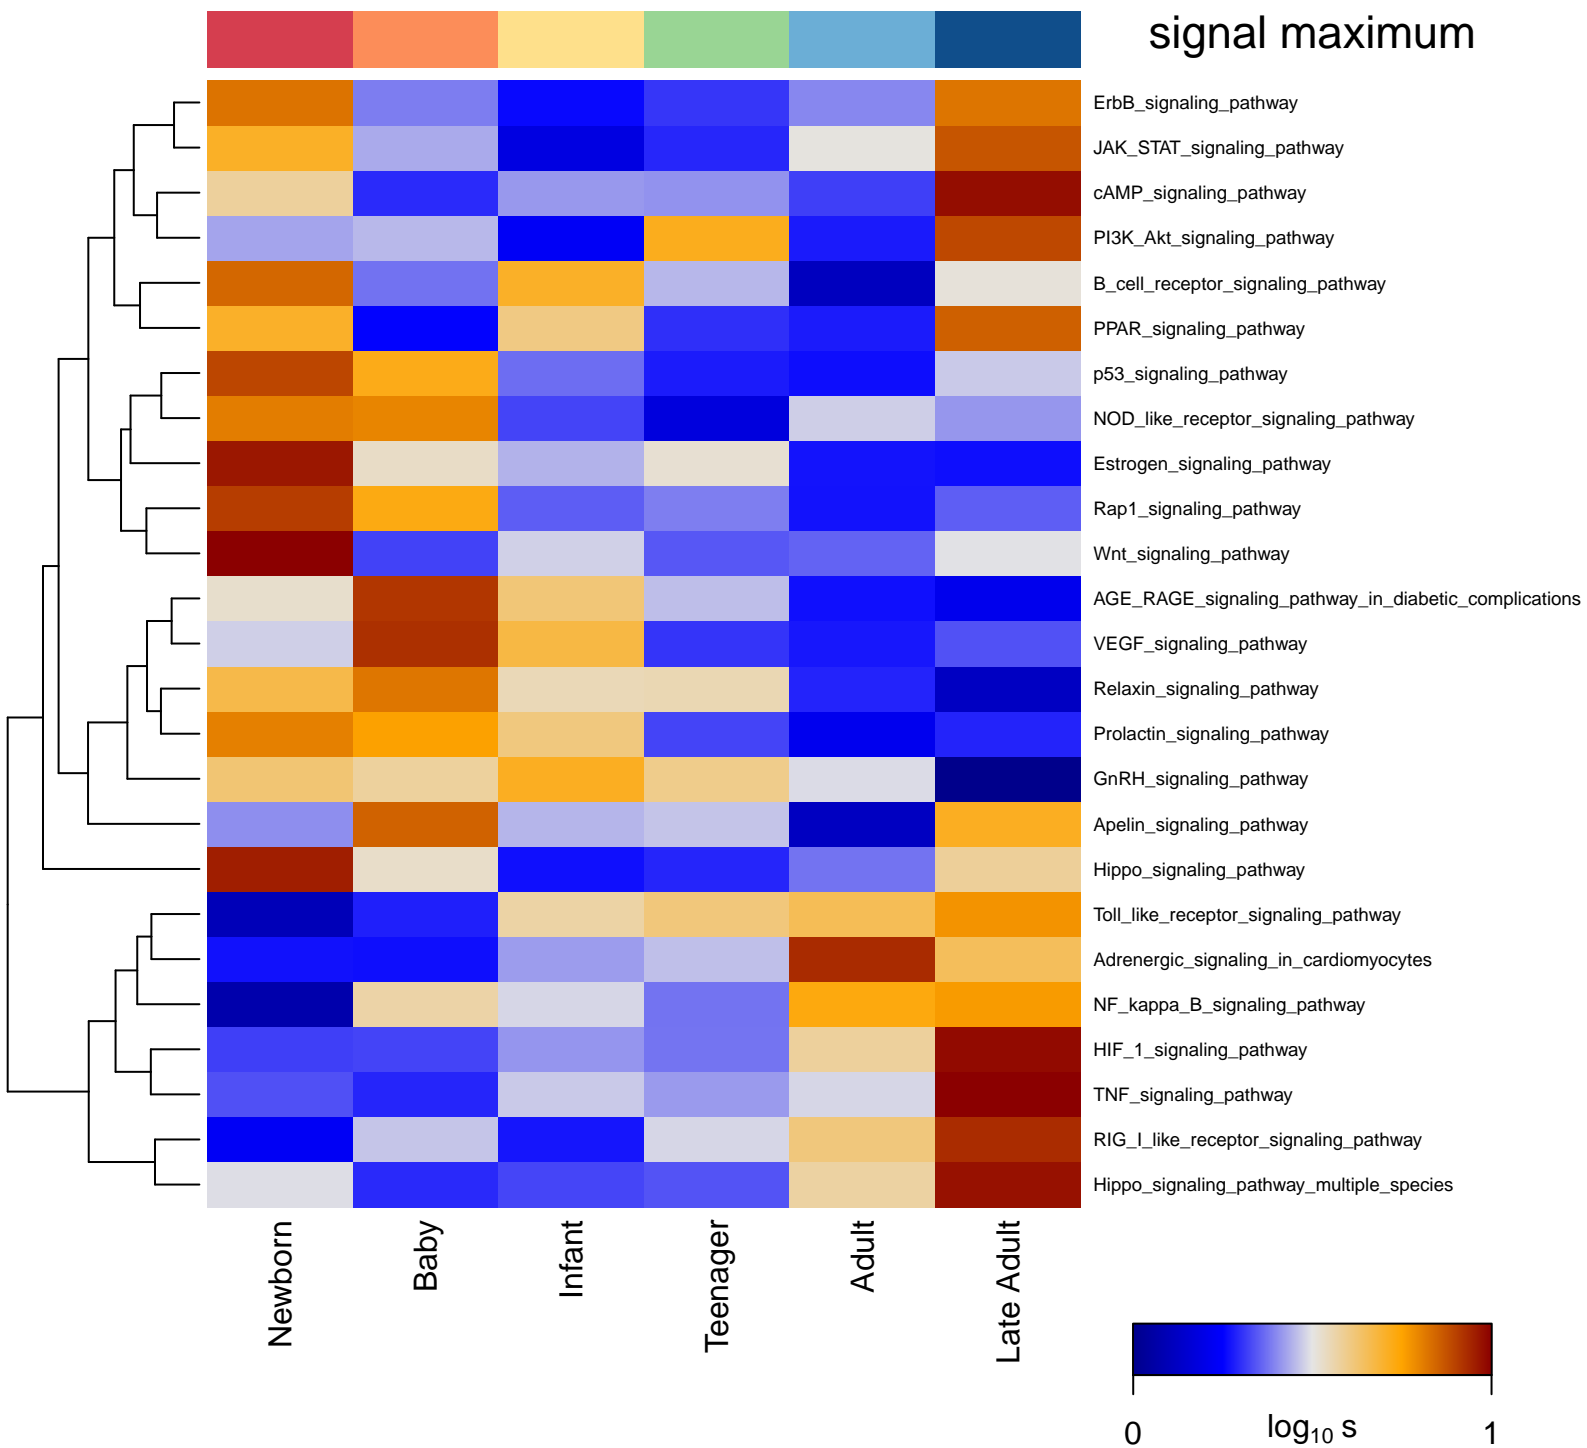

Supplement: s1 [file s1]

# Thyroid hormone signaling pathway

all genes

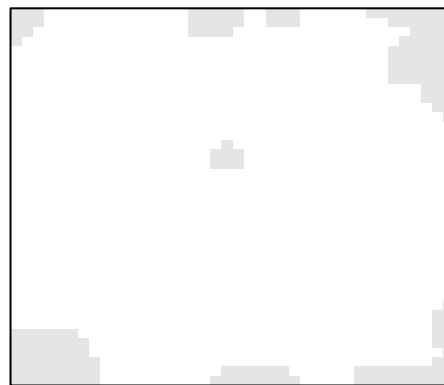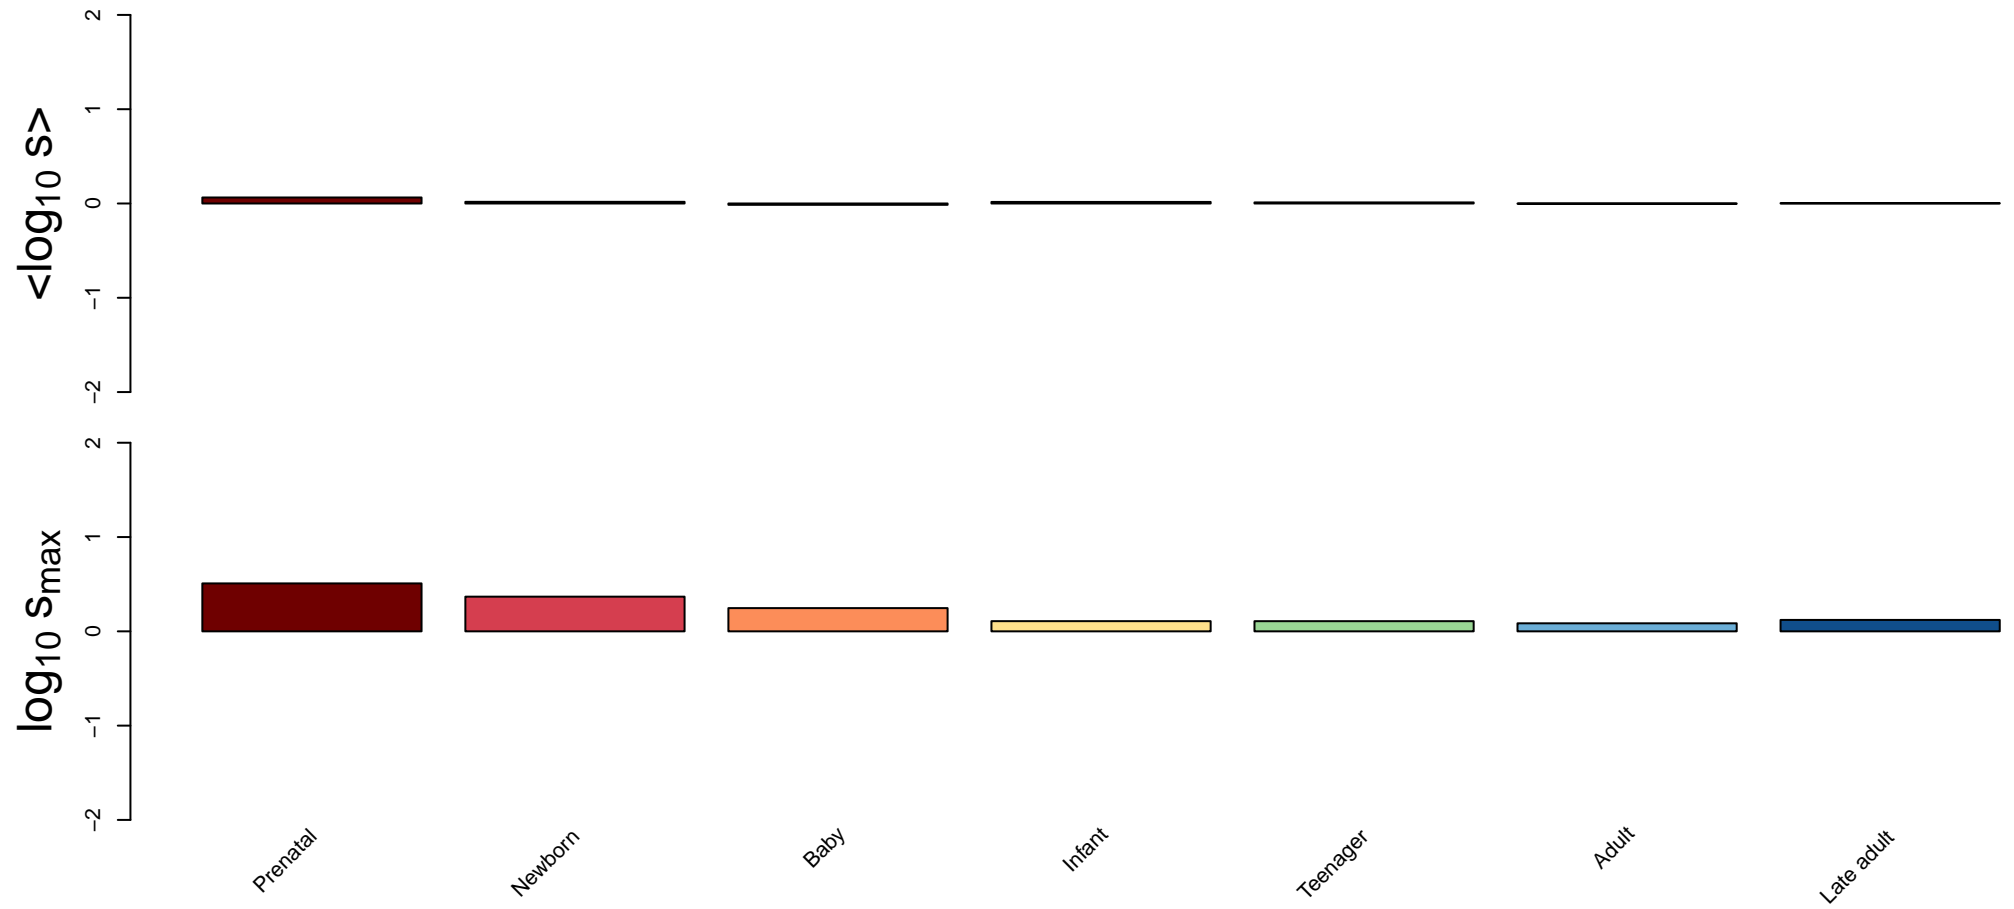

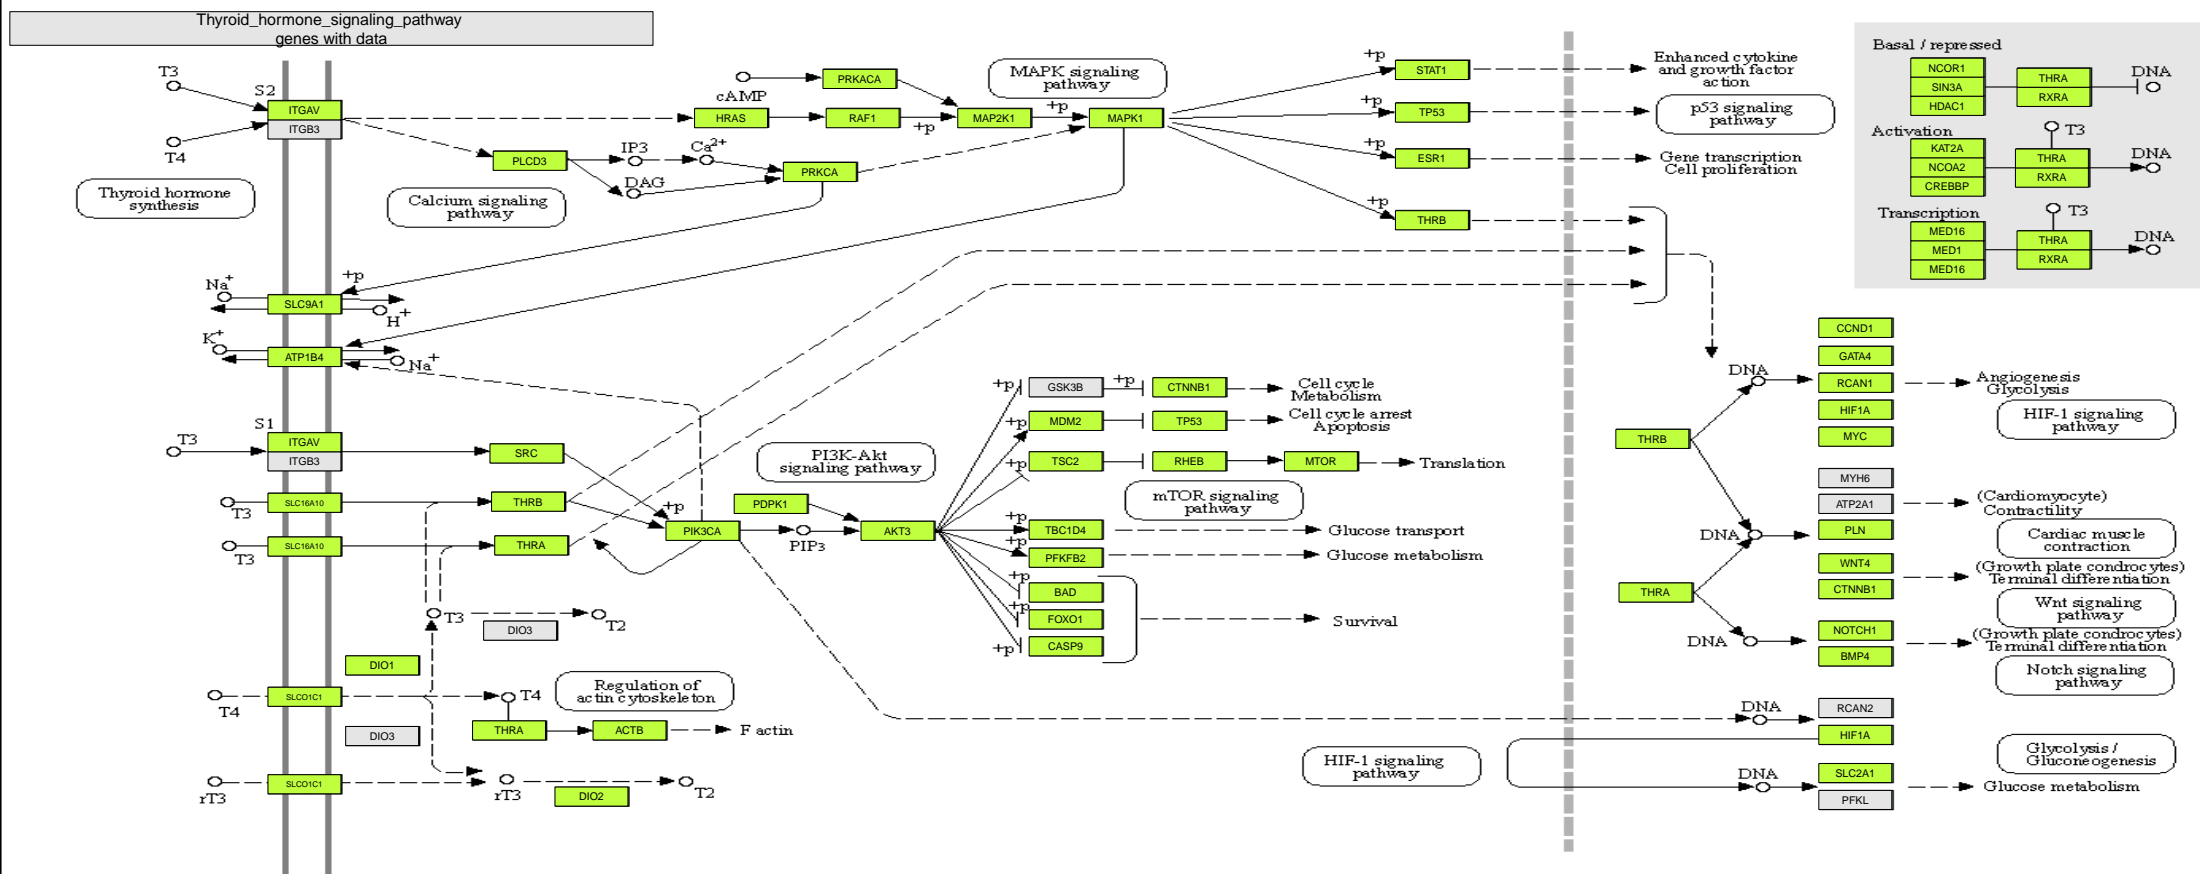

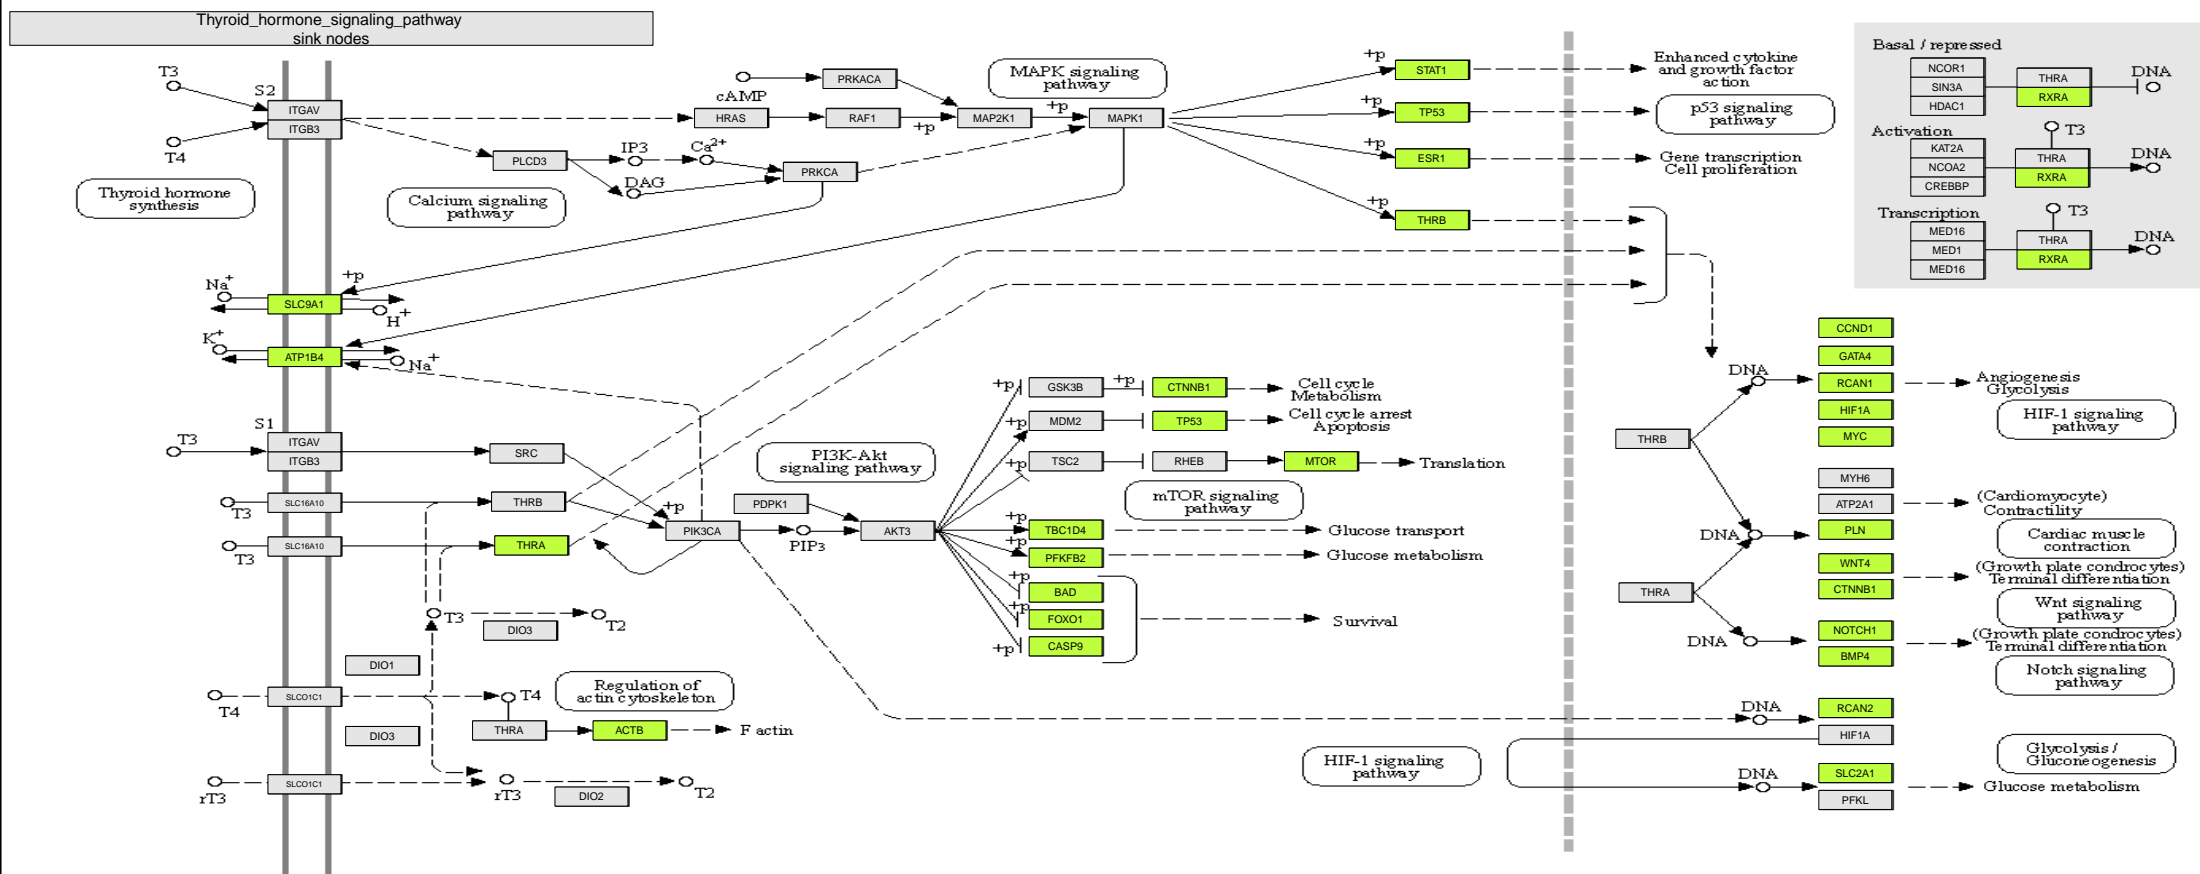

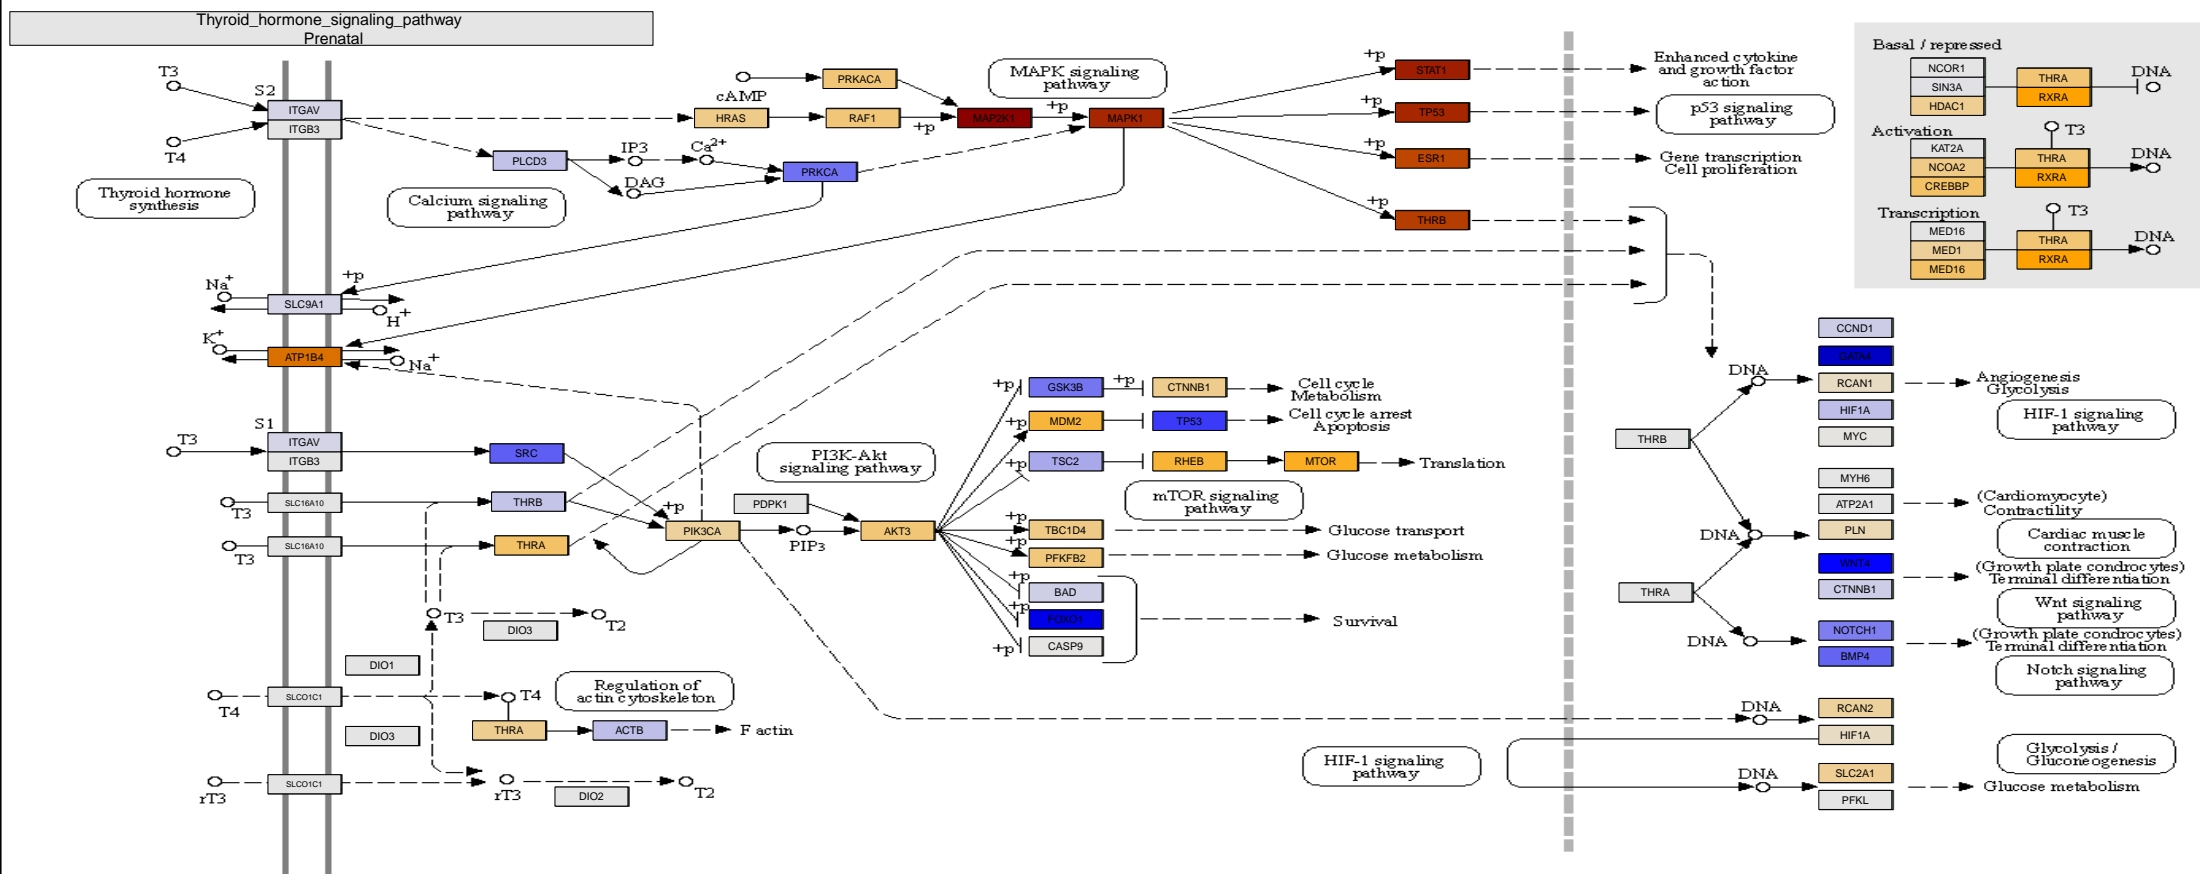

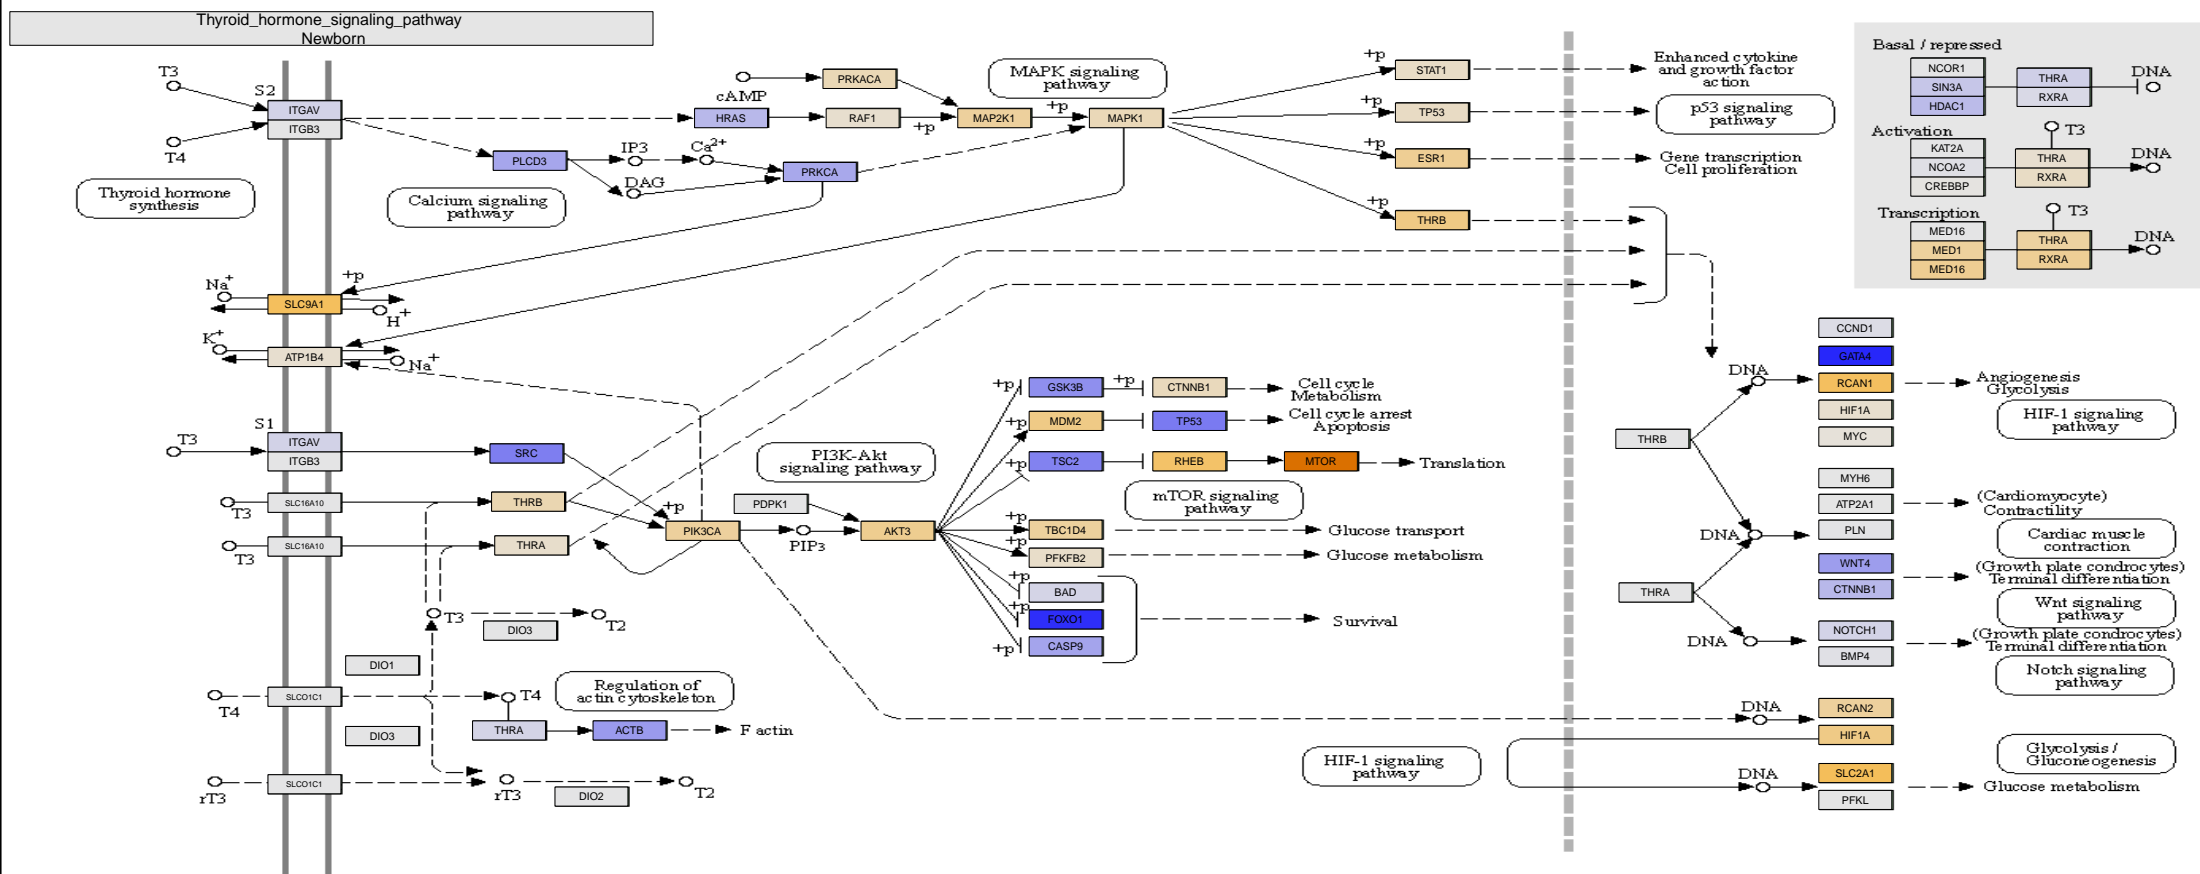

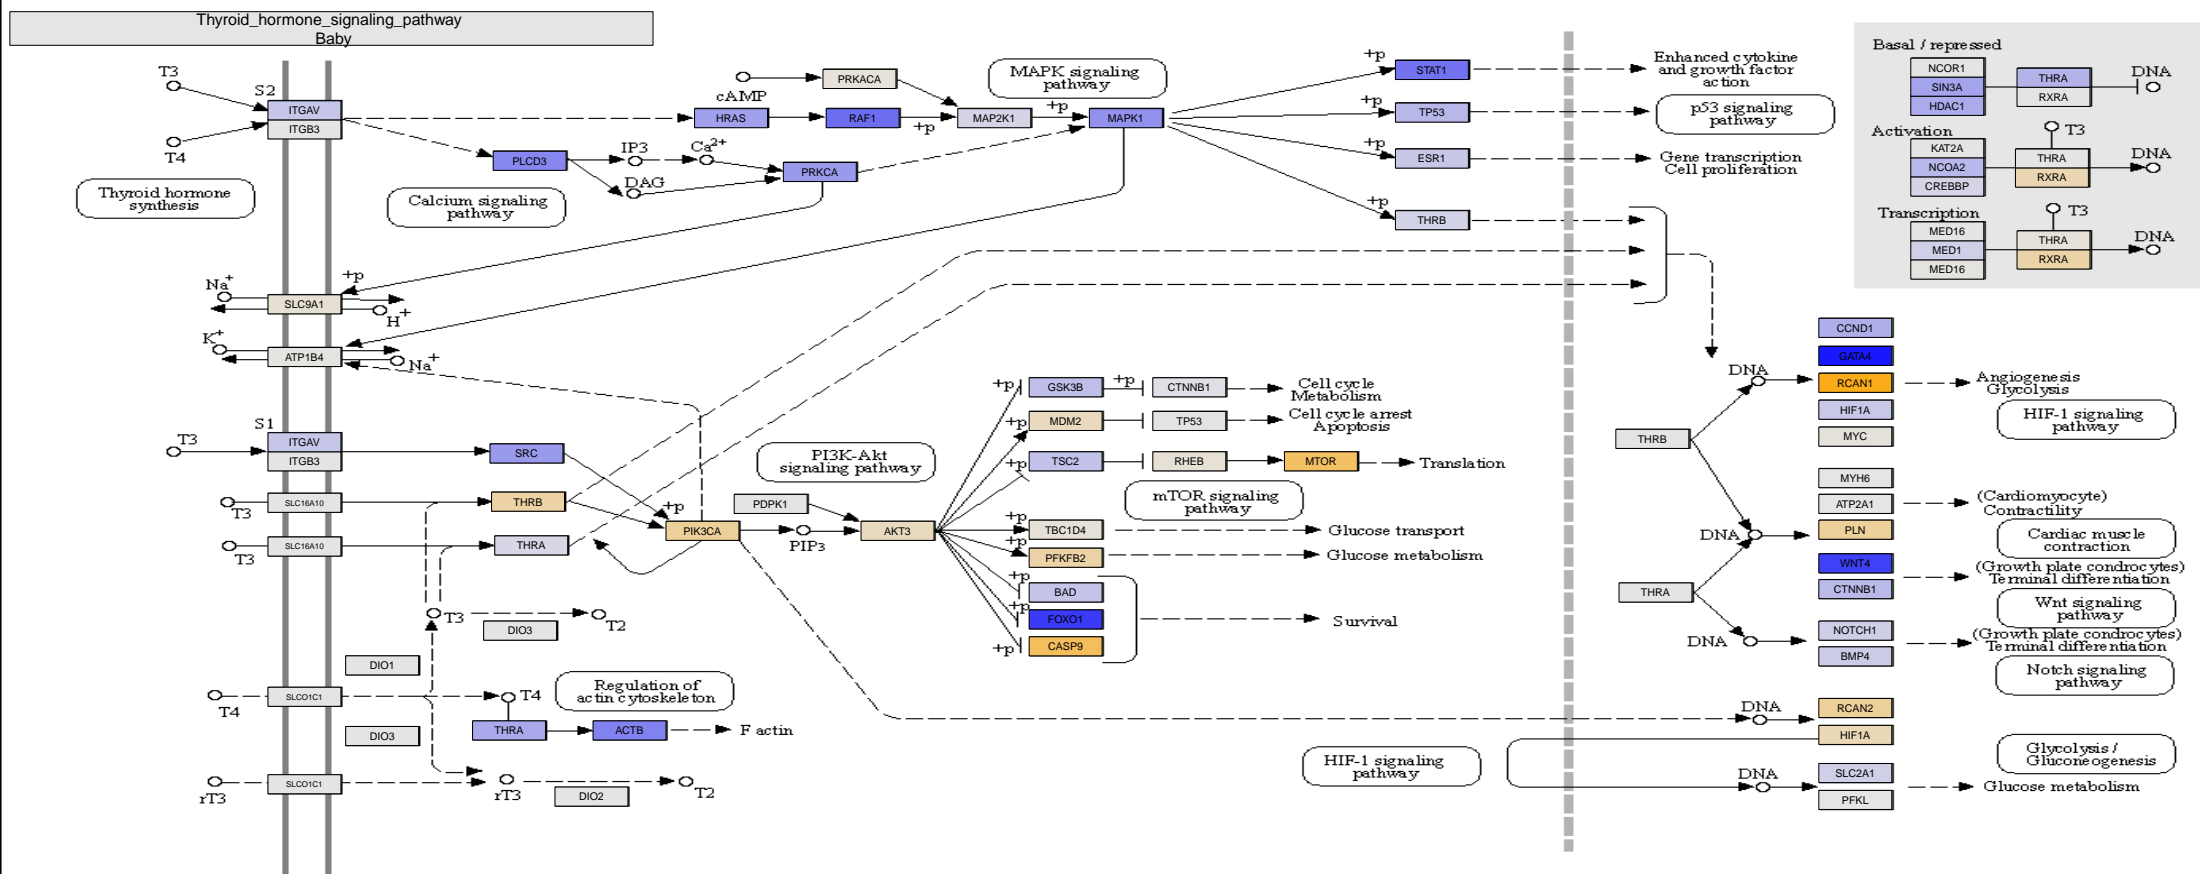

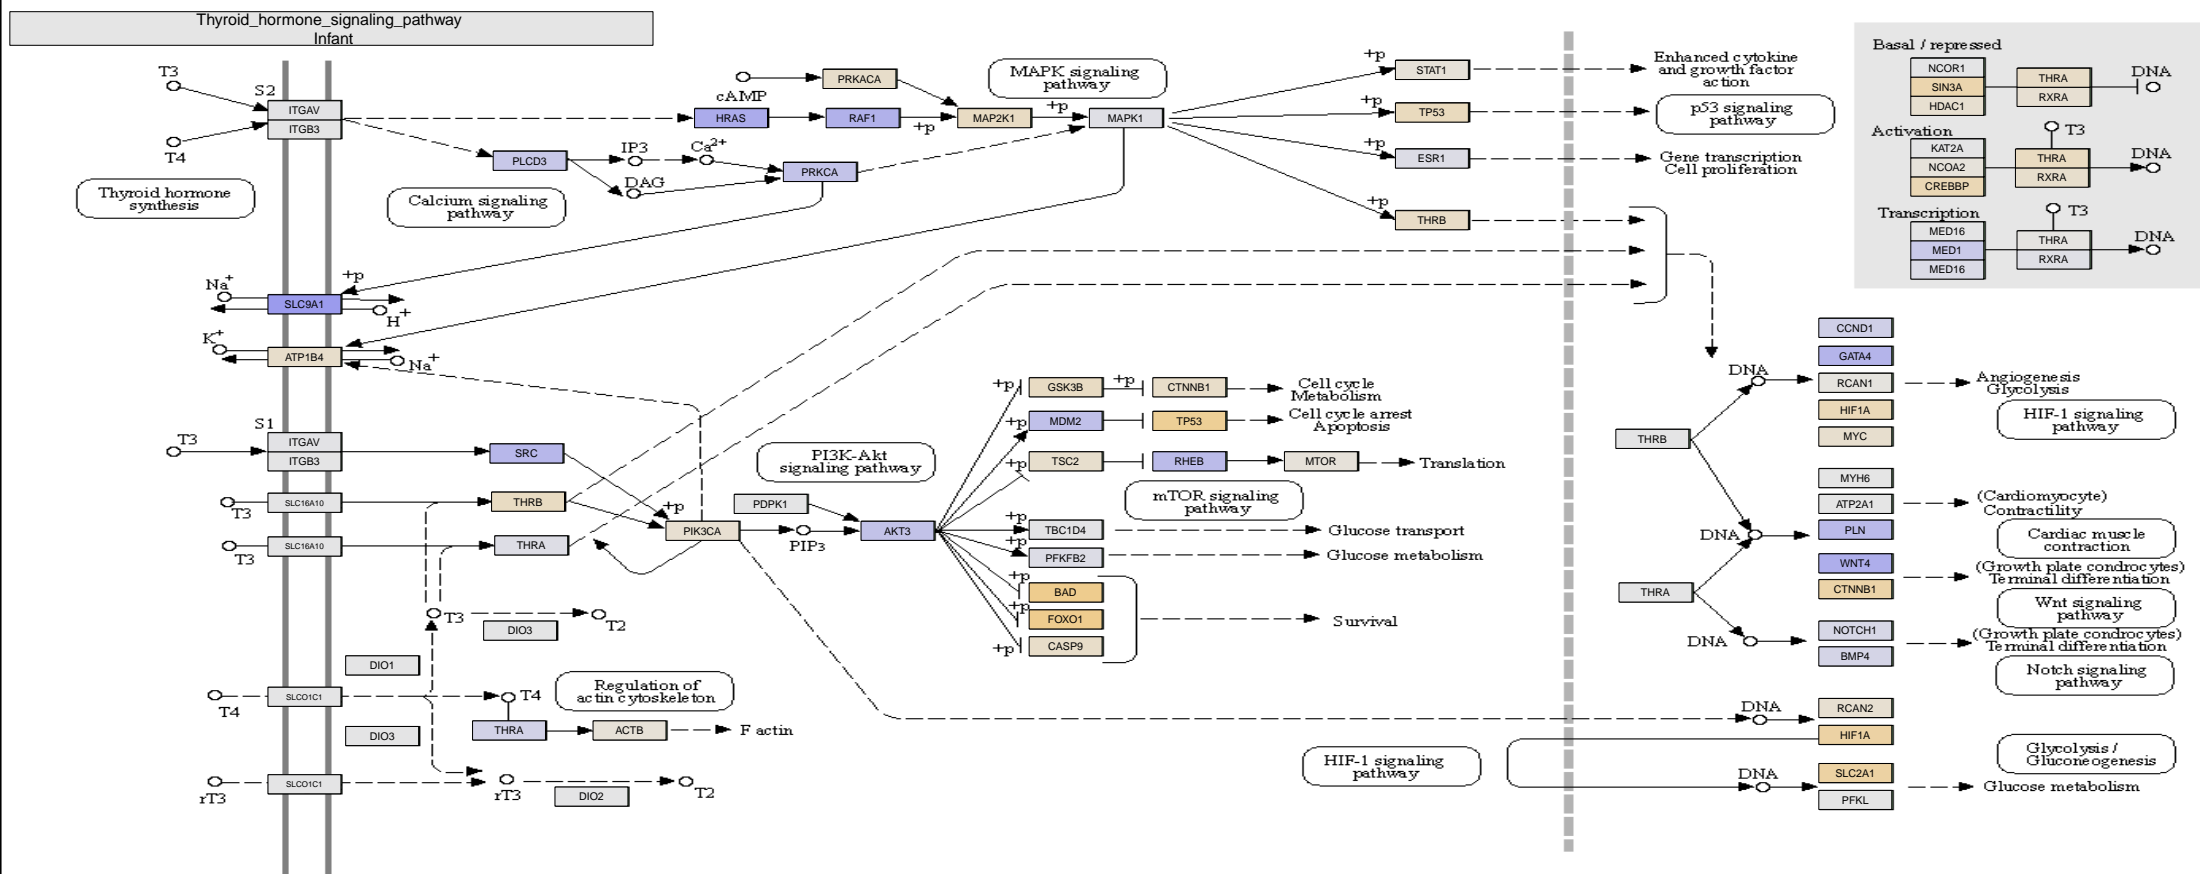

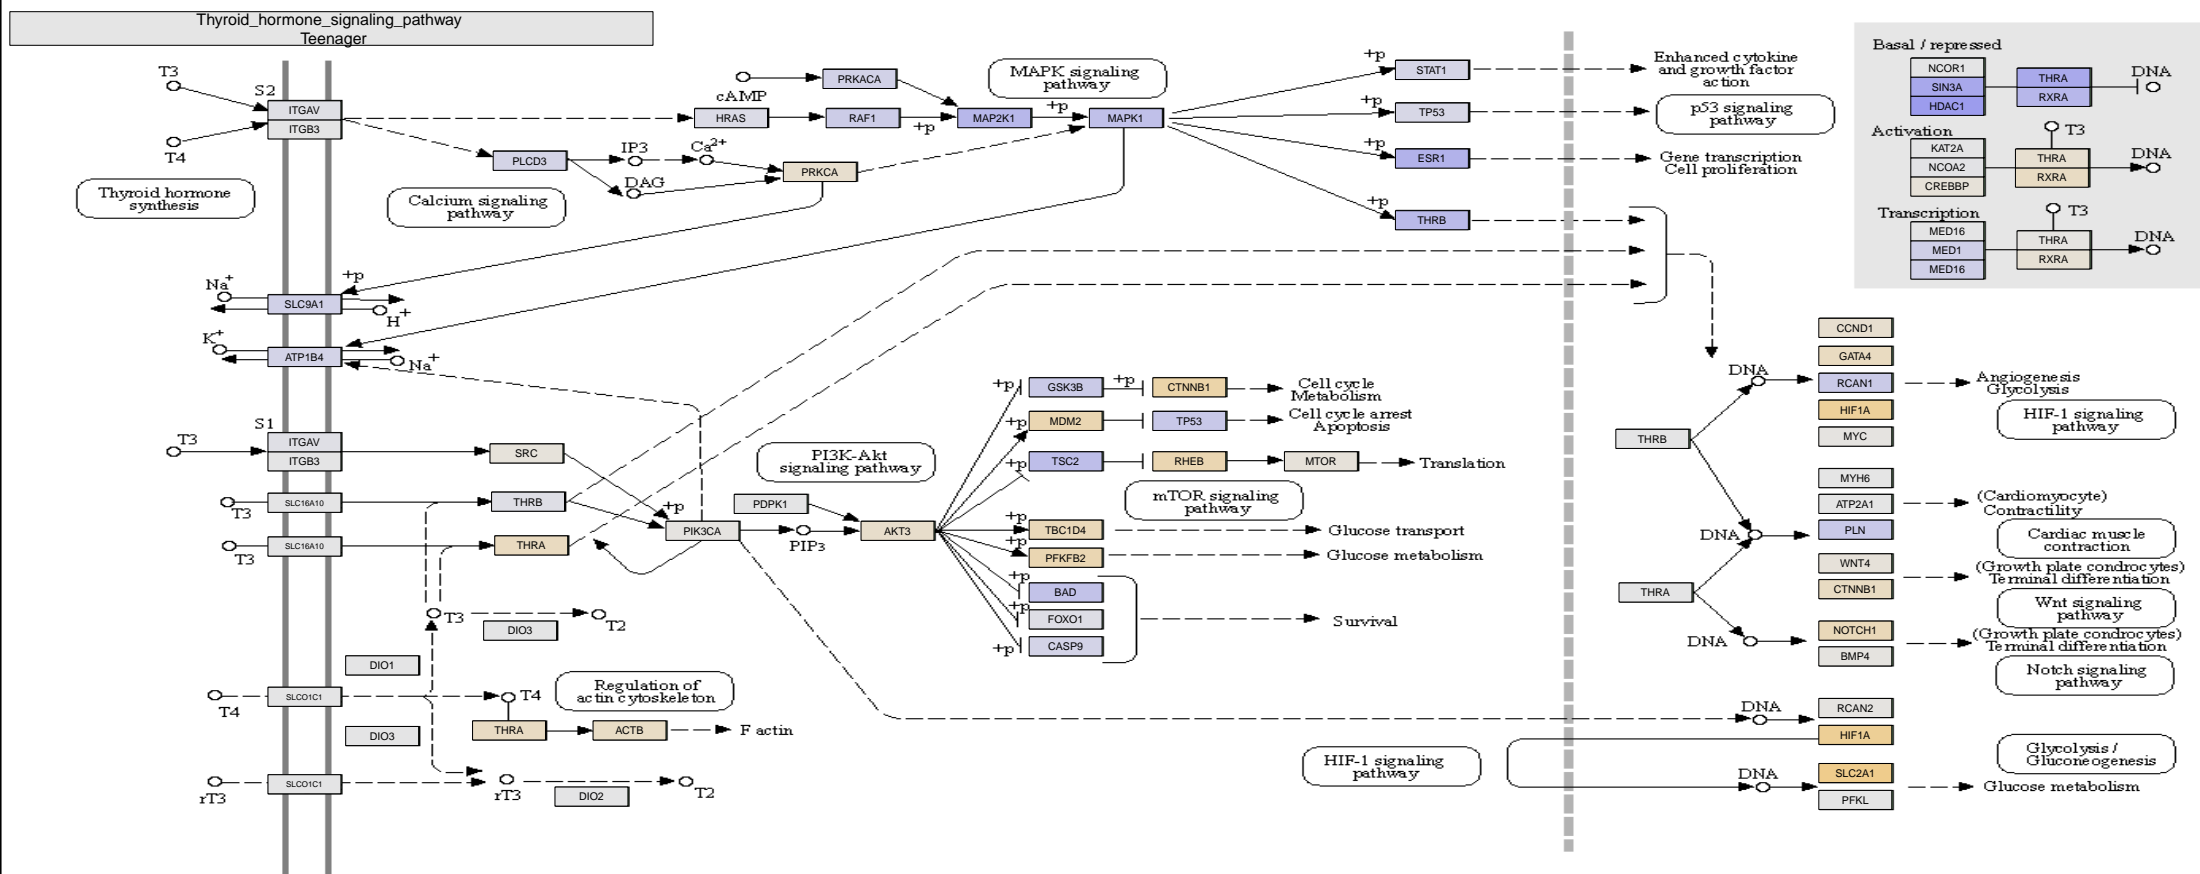



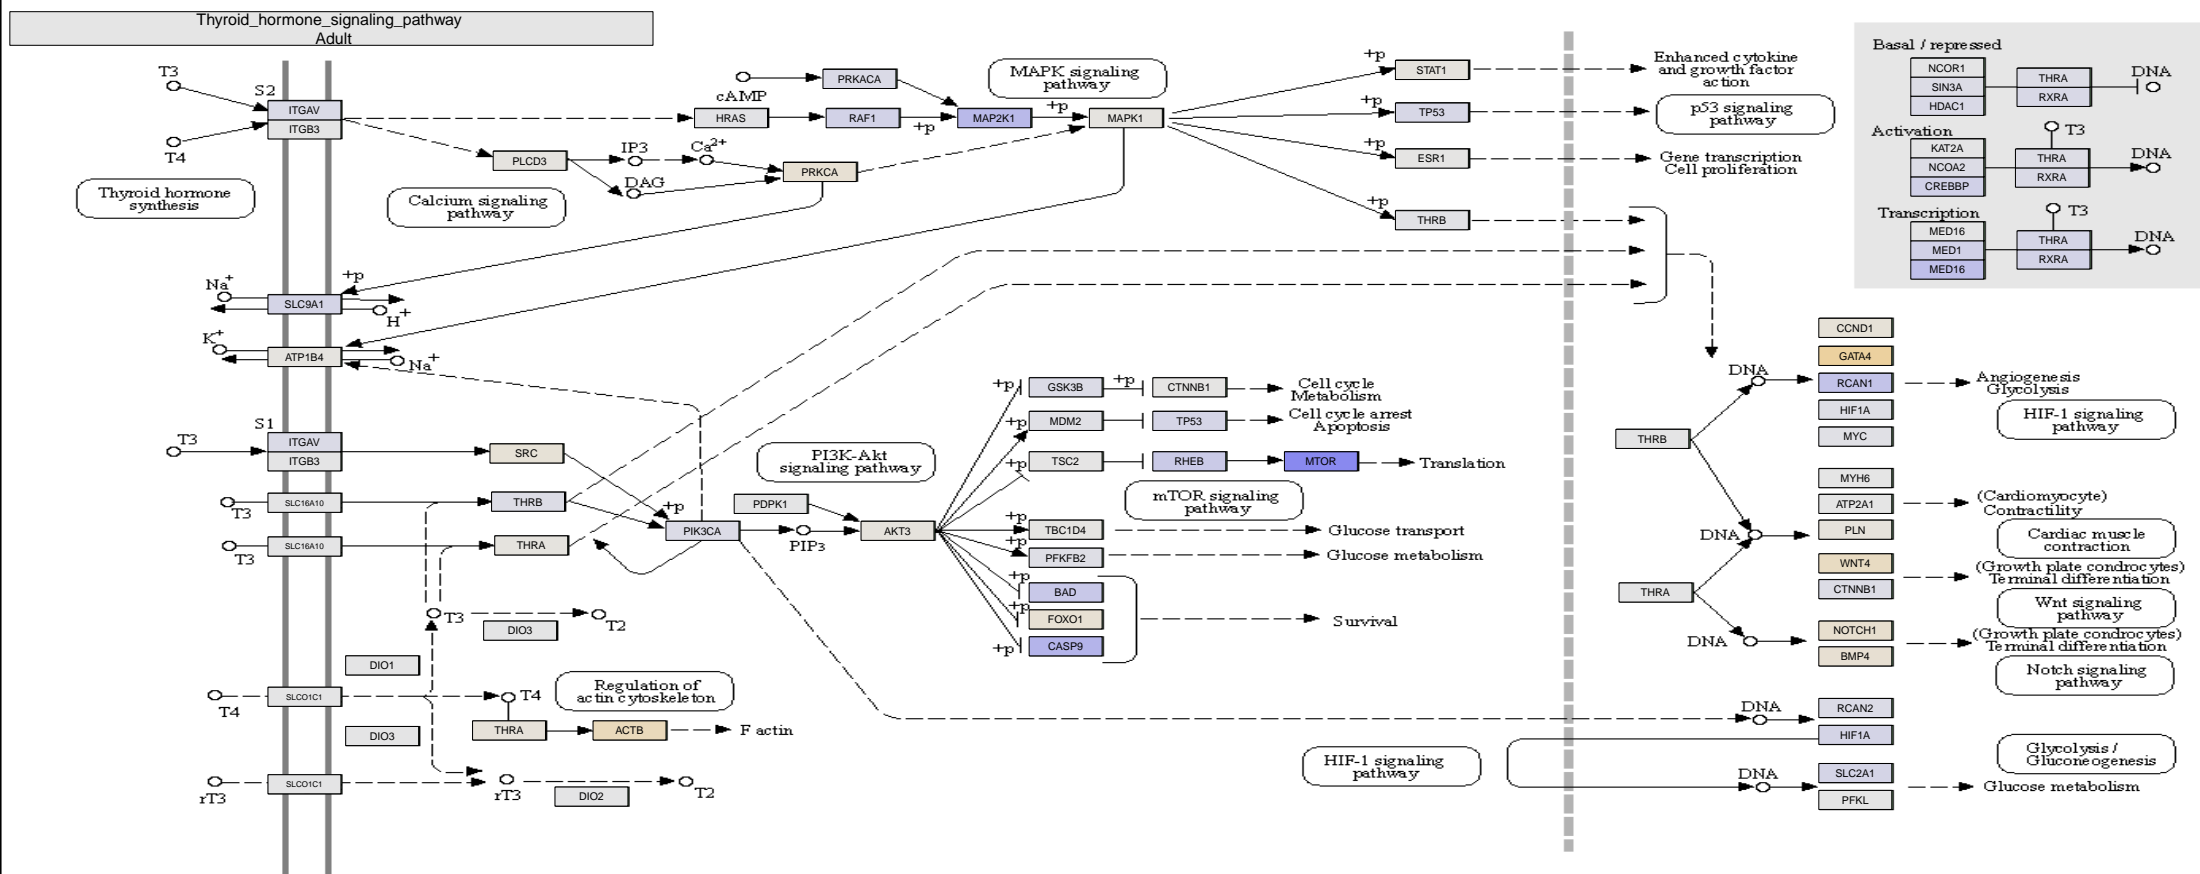

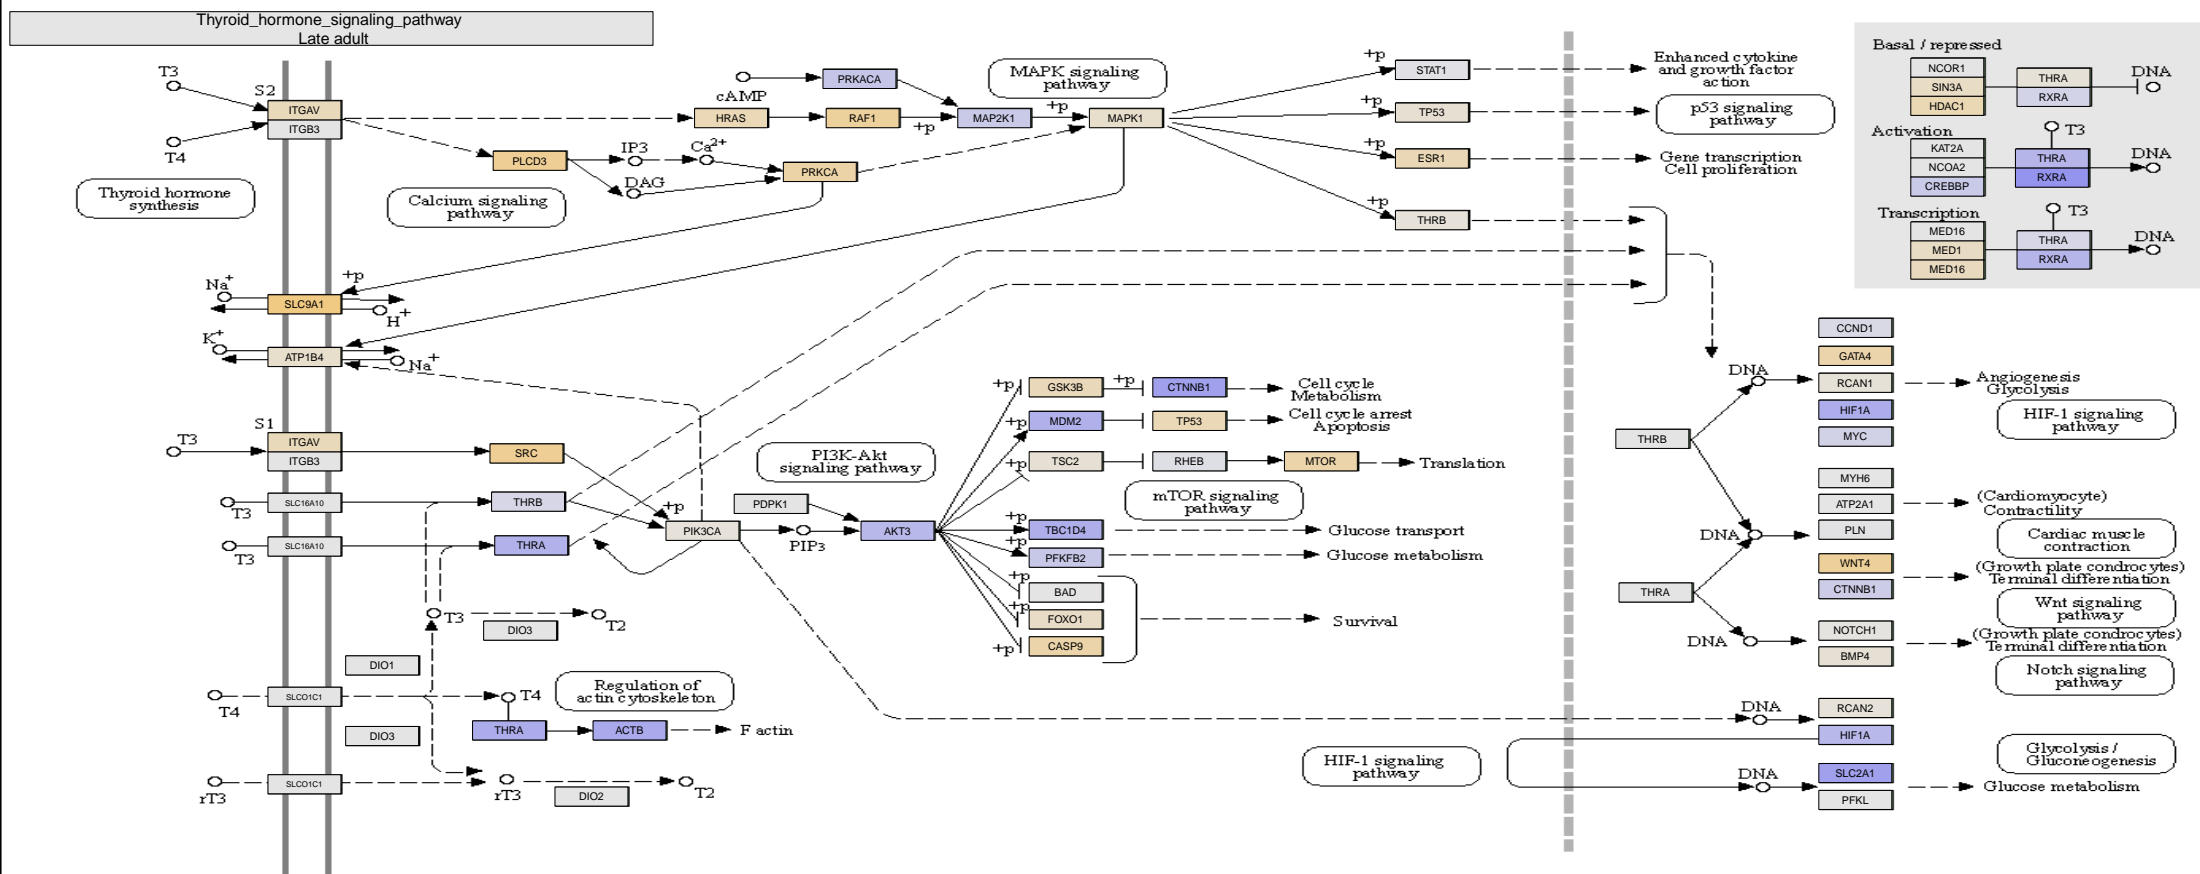

Supplement: s1 [file s1]

Retrograde endocannabinoid signaling

all genes

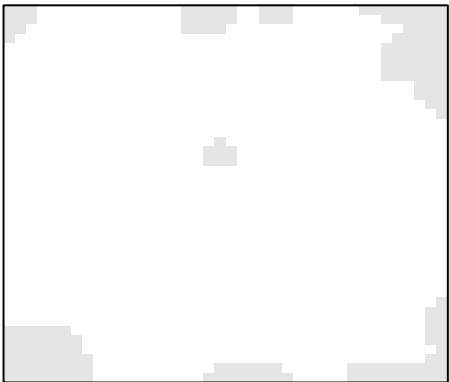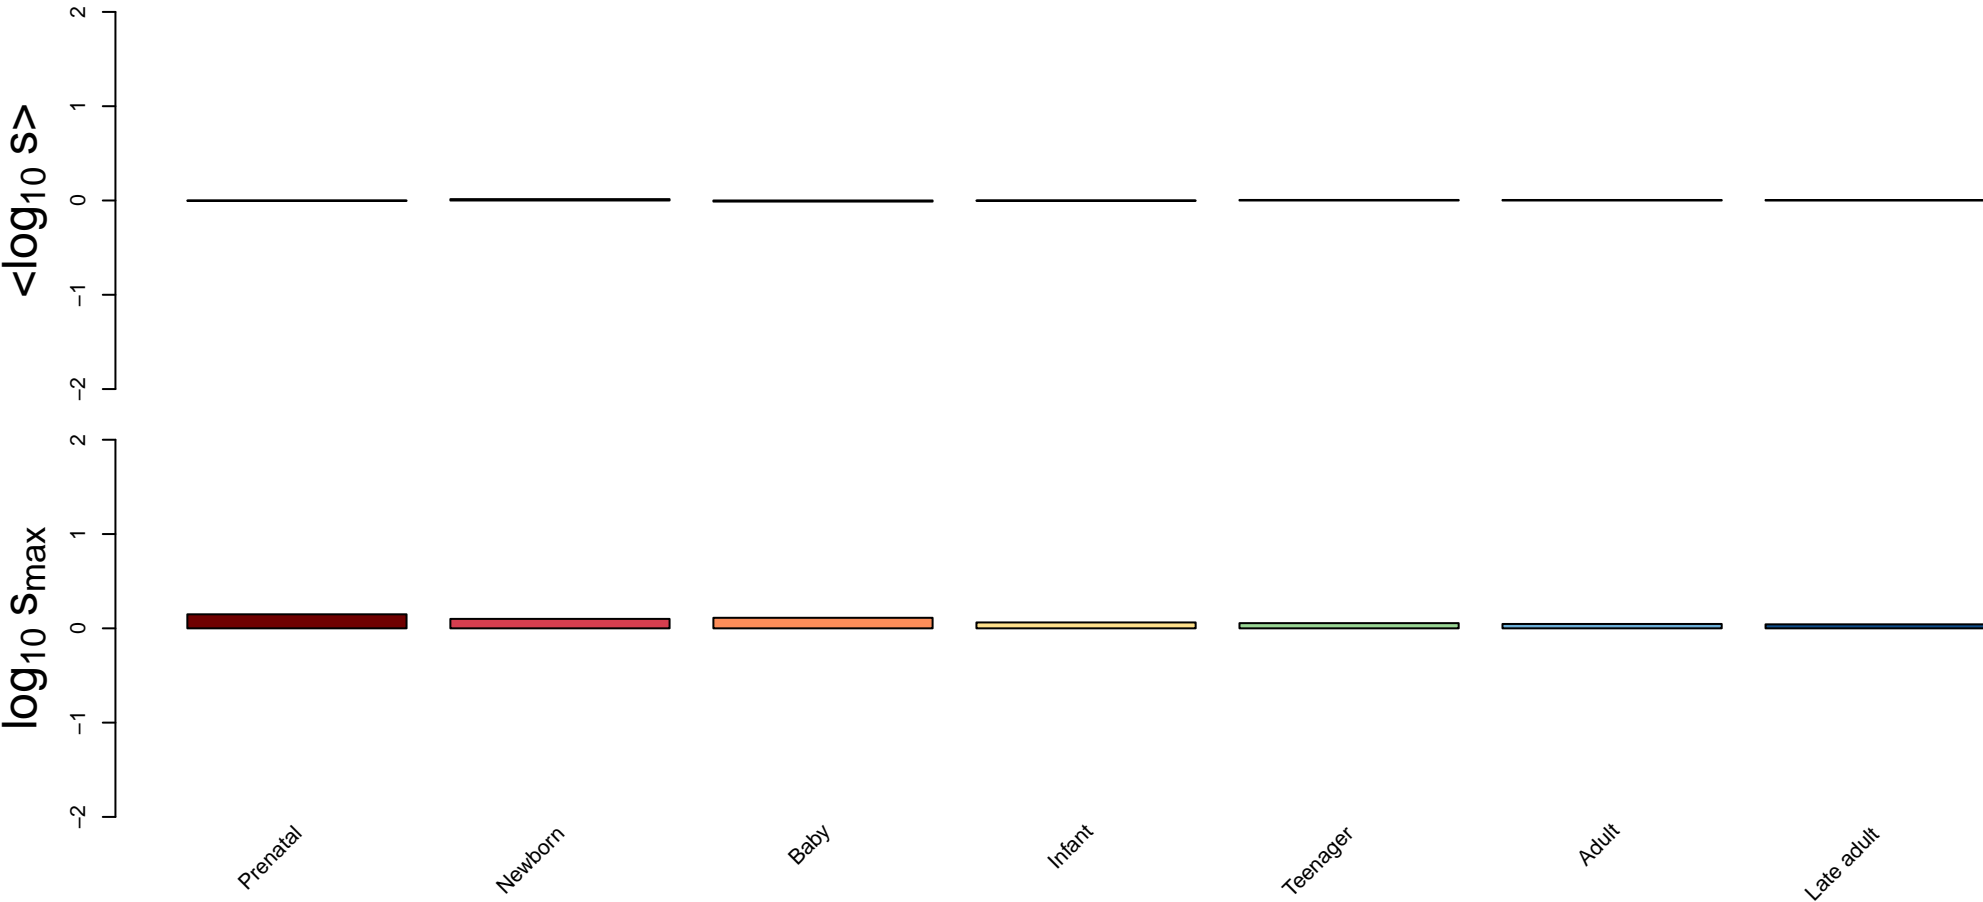

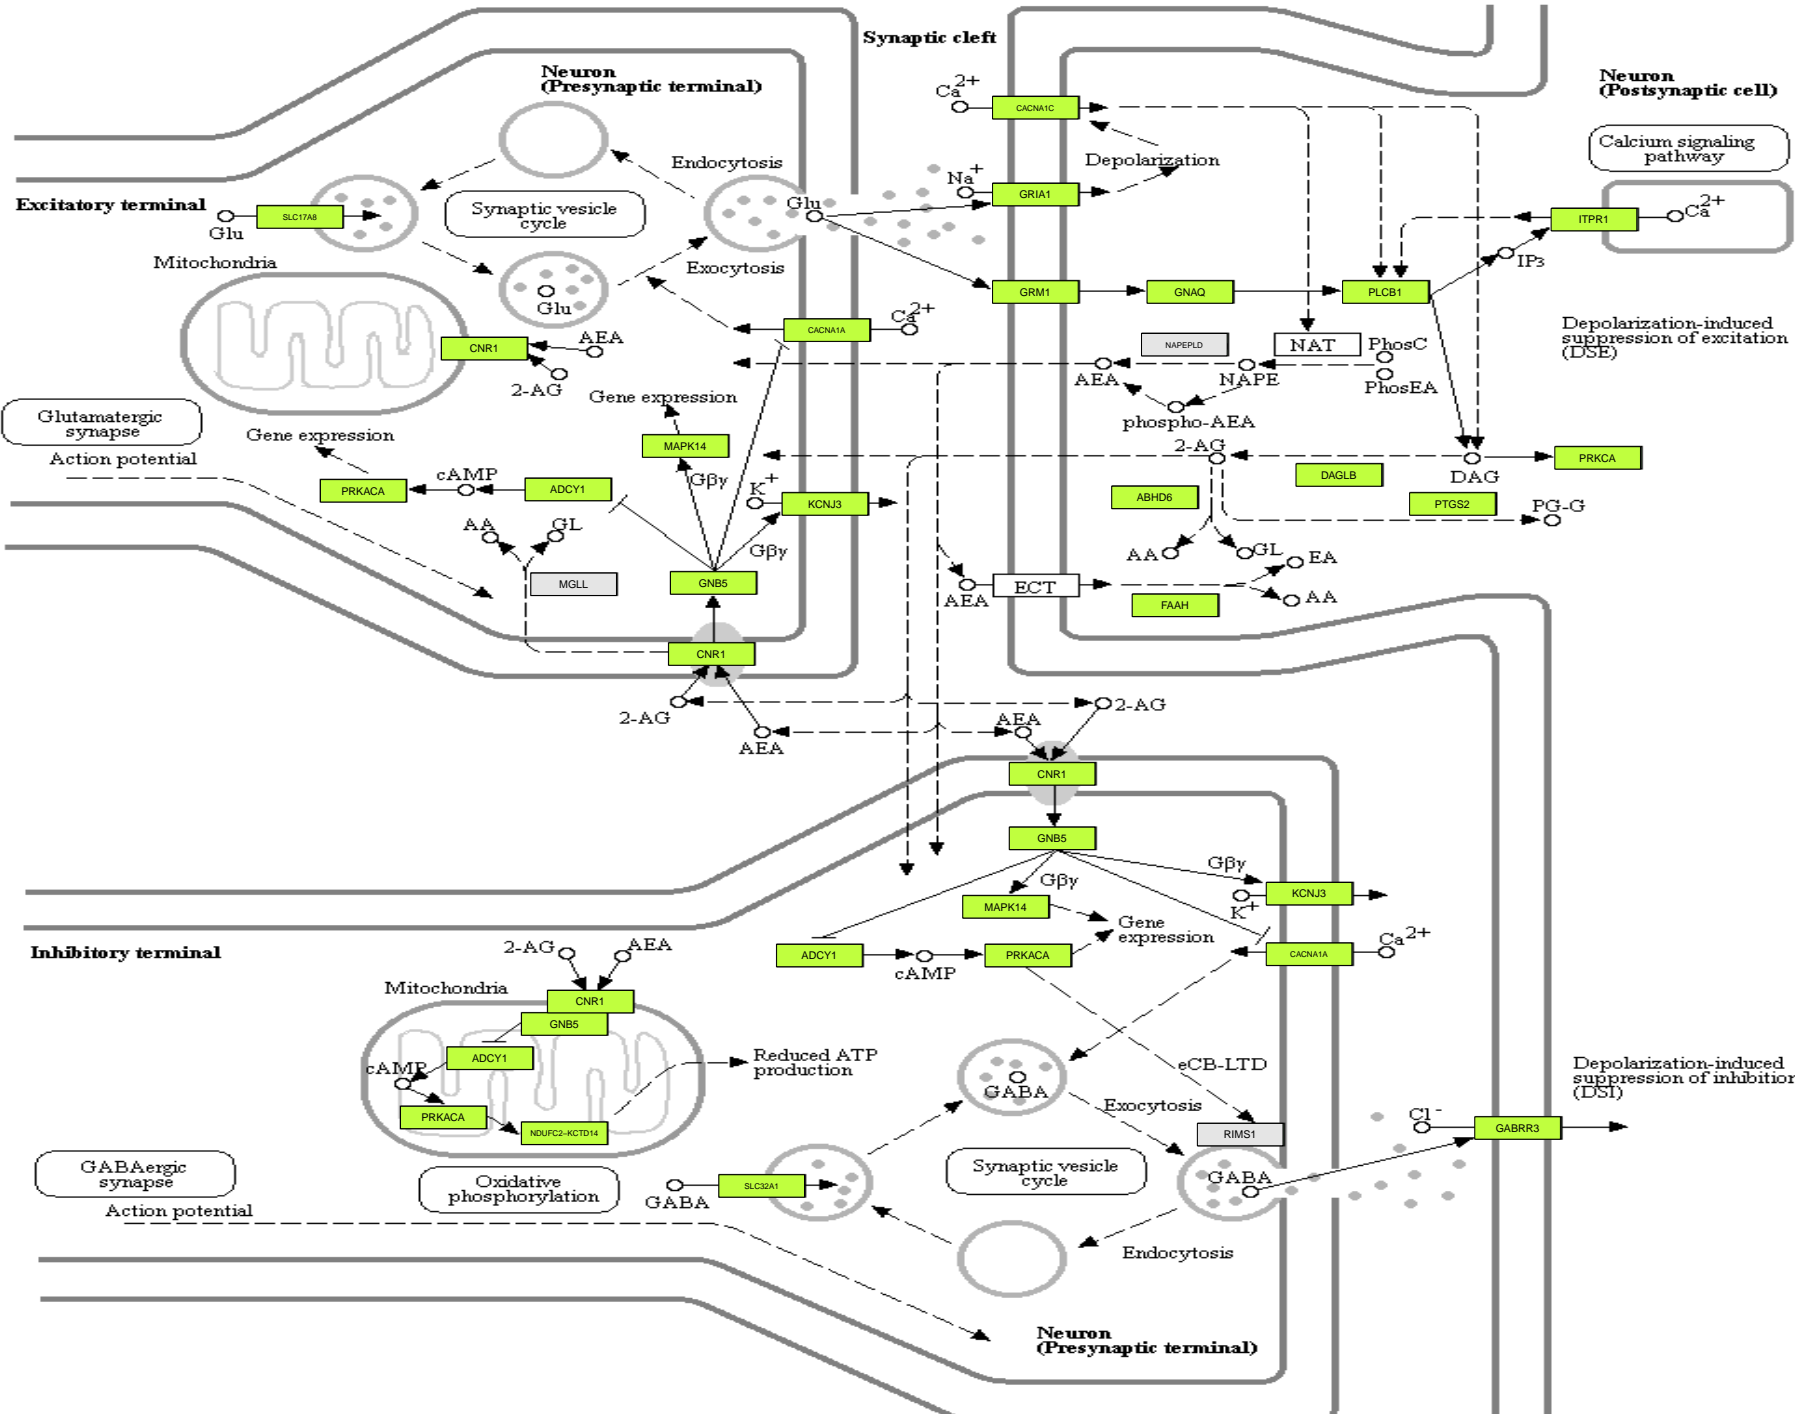

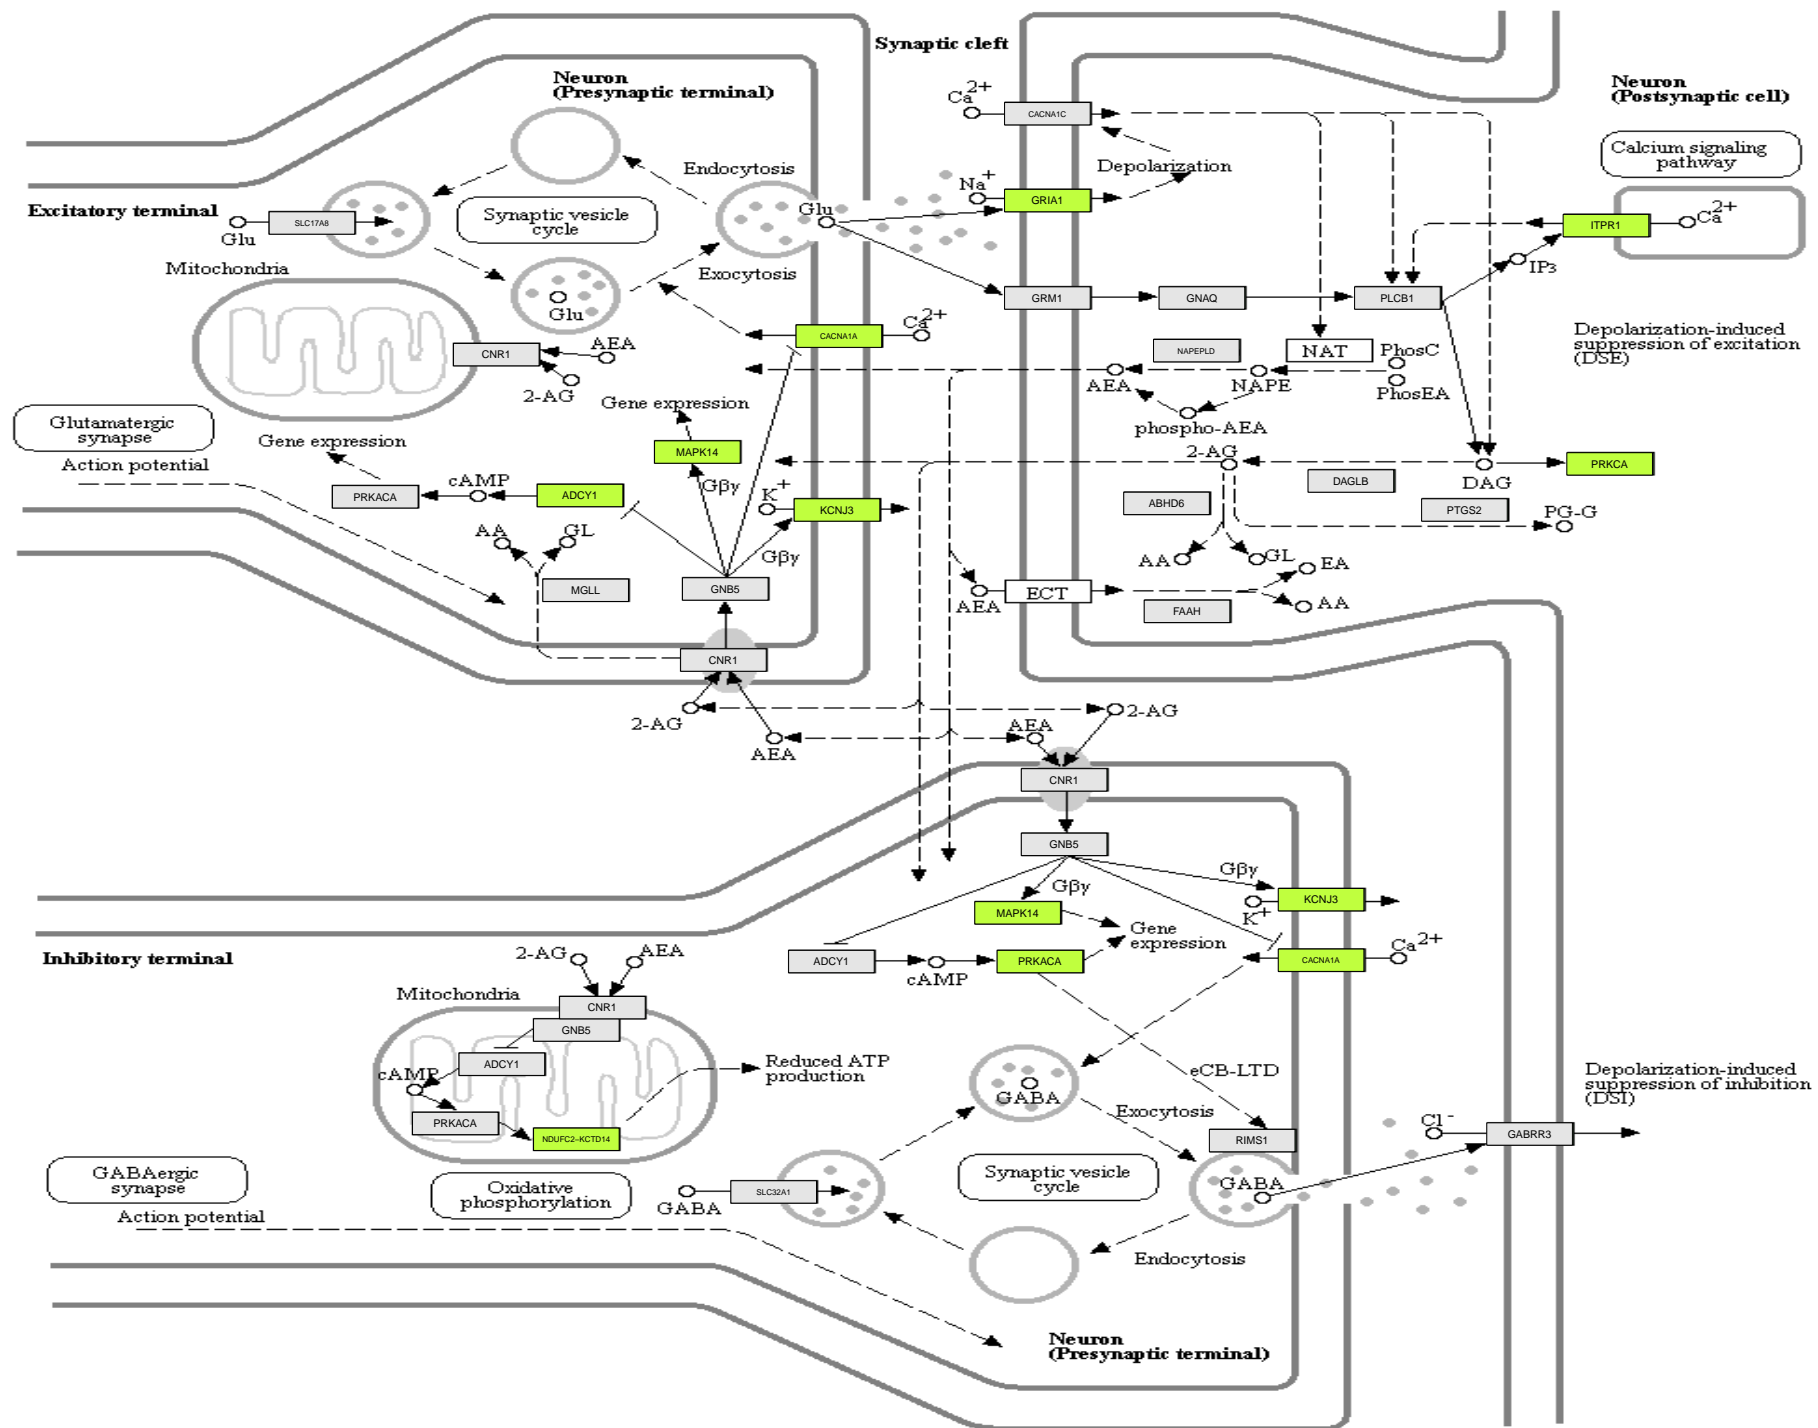

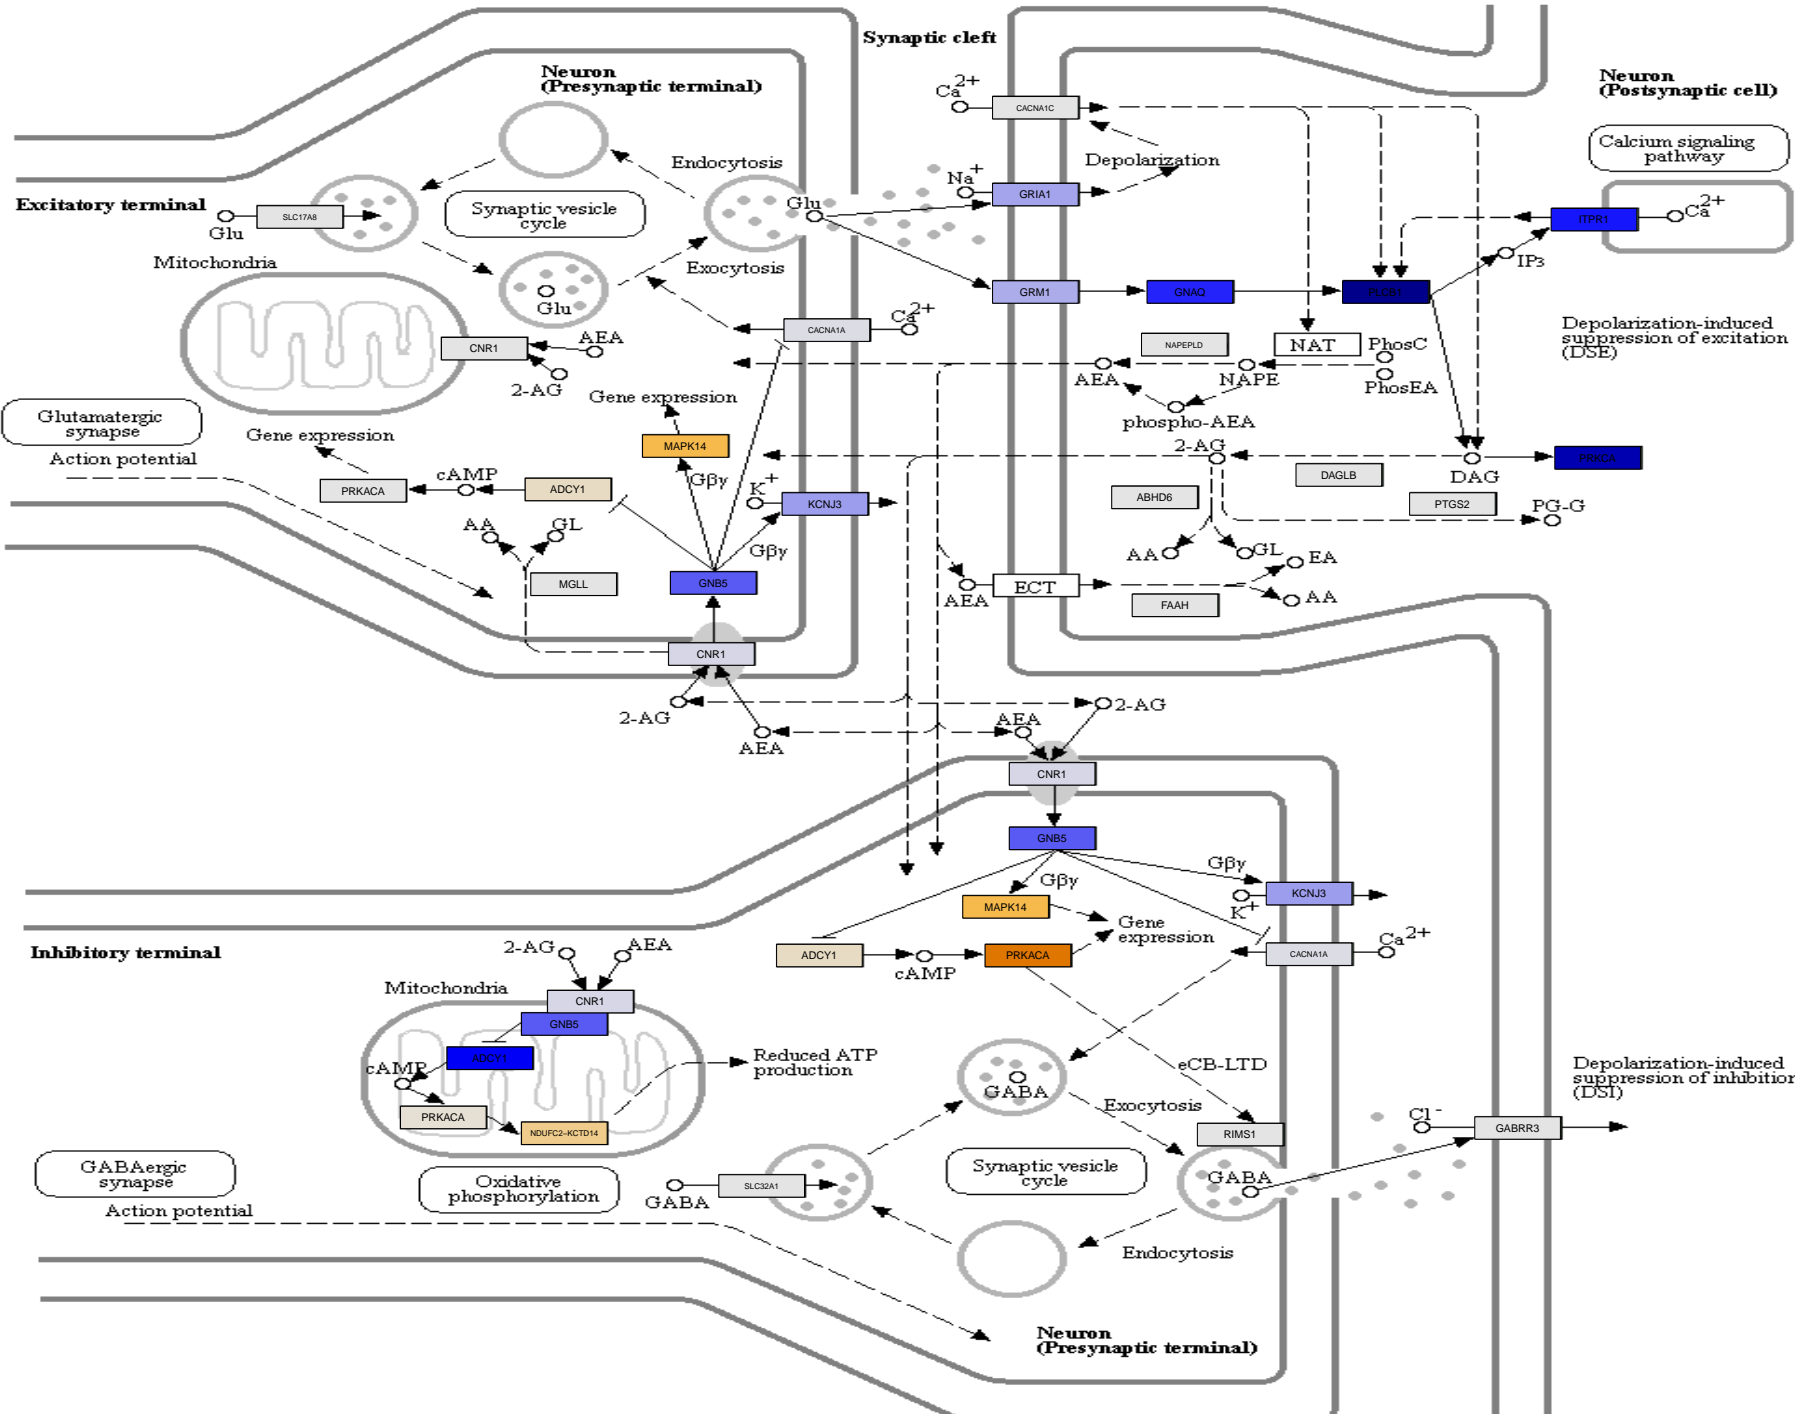

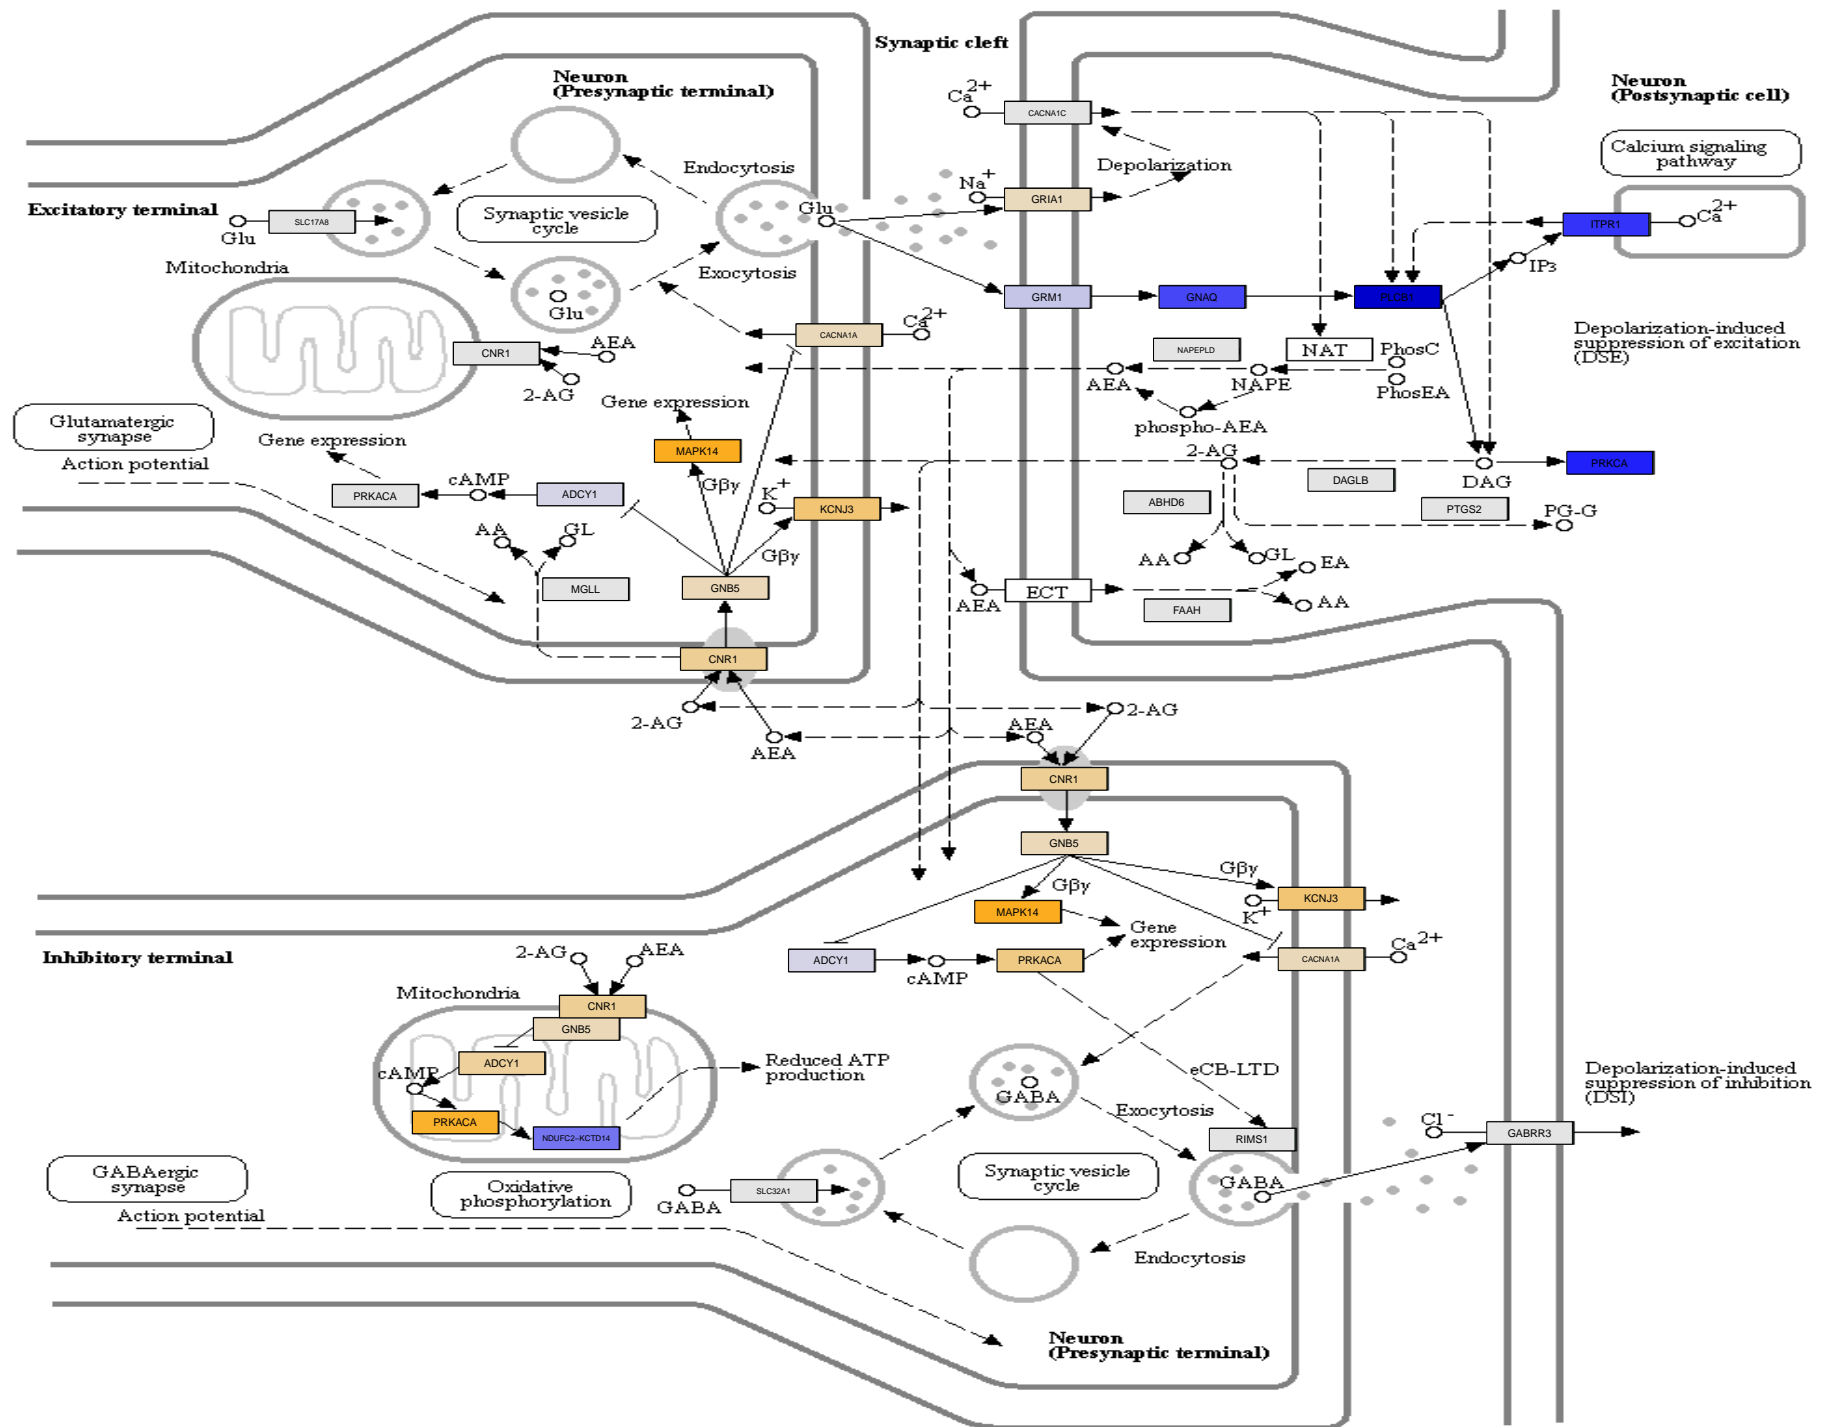

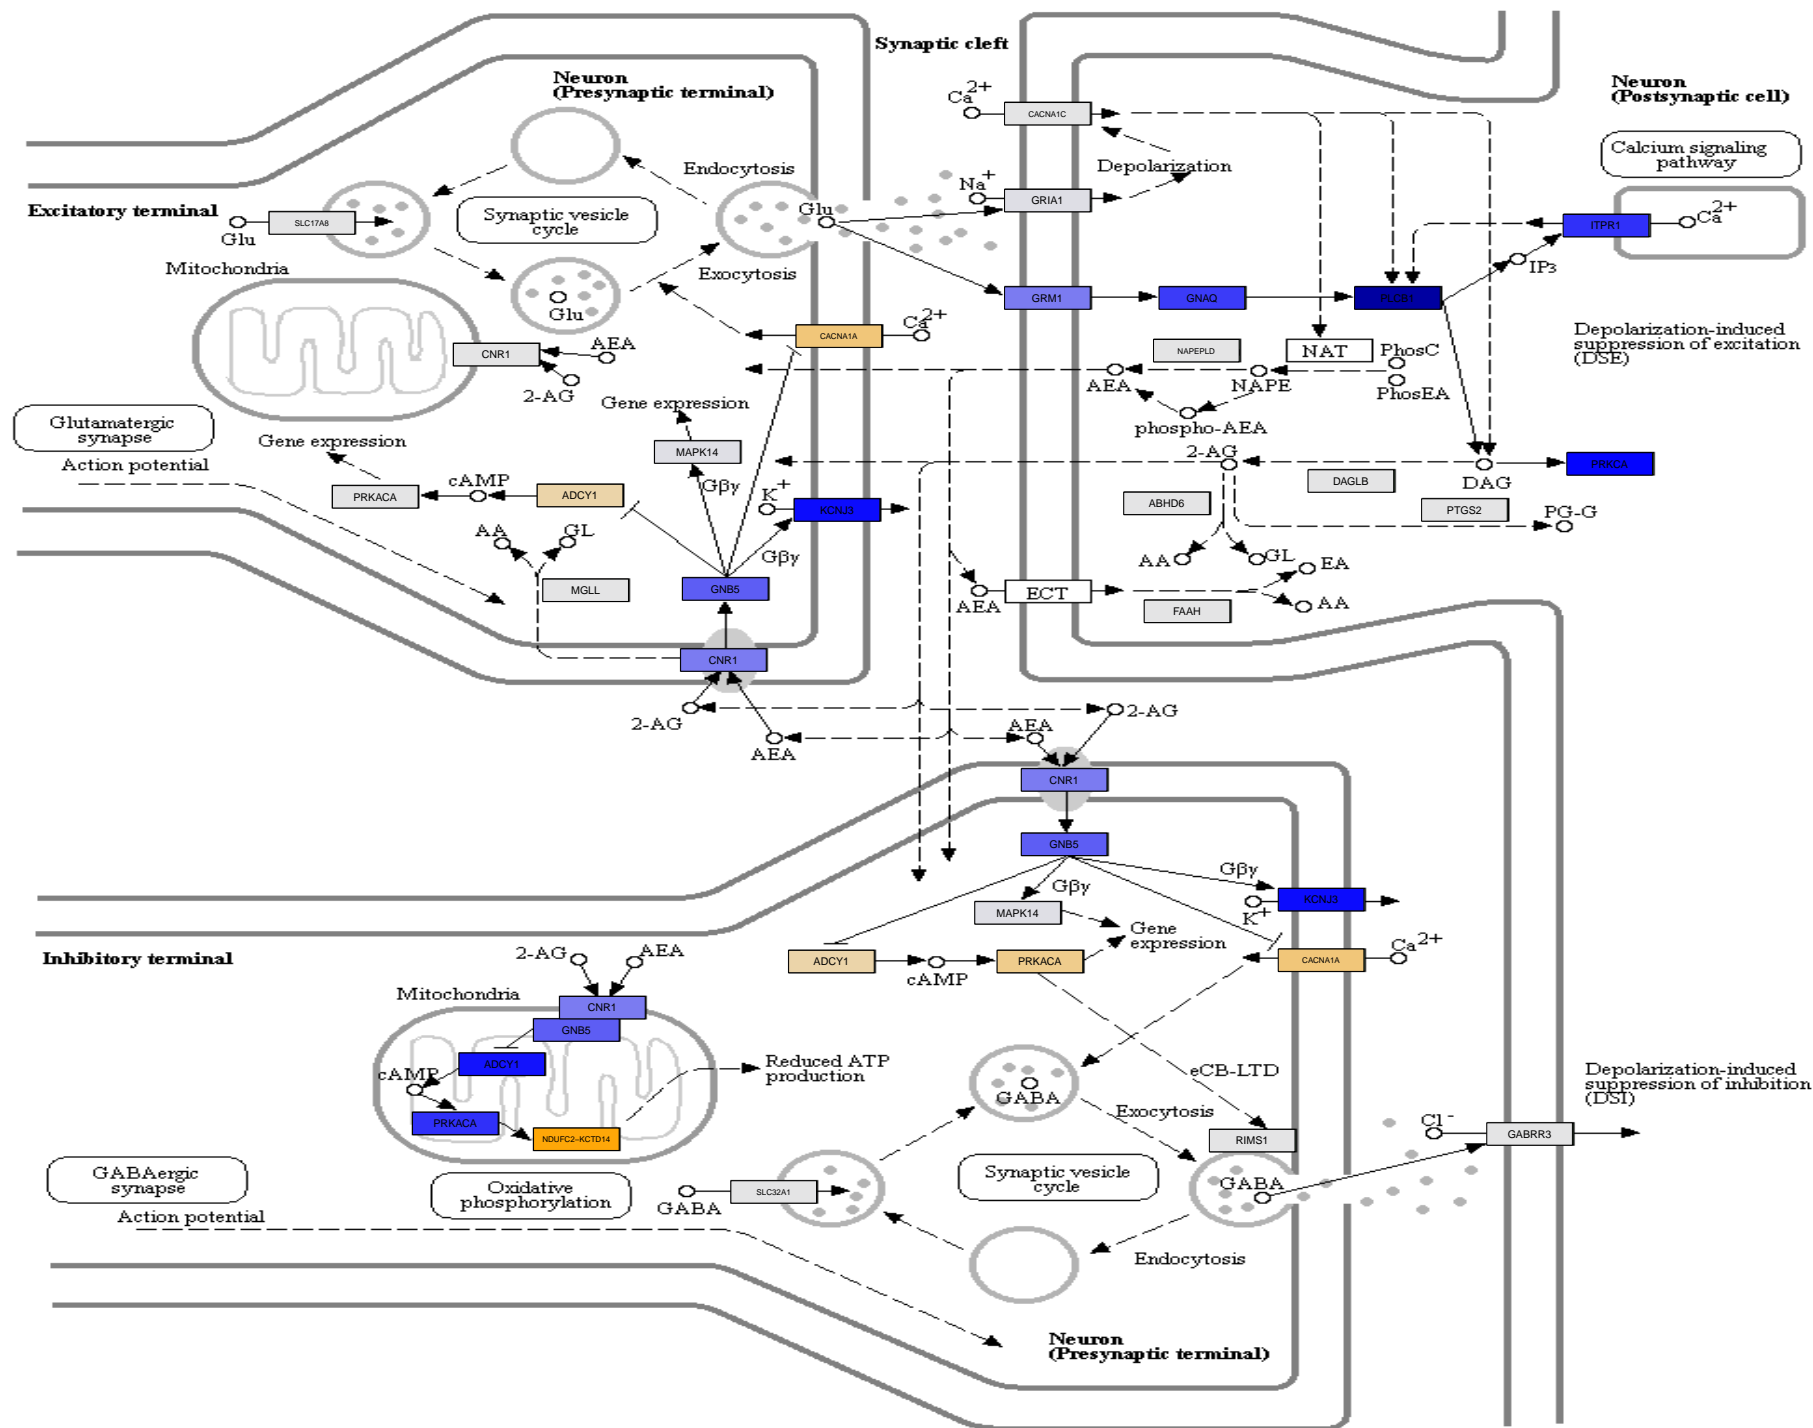

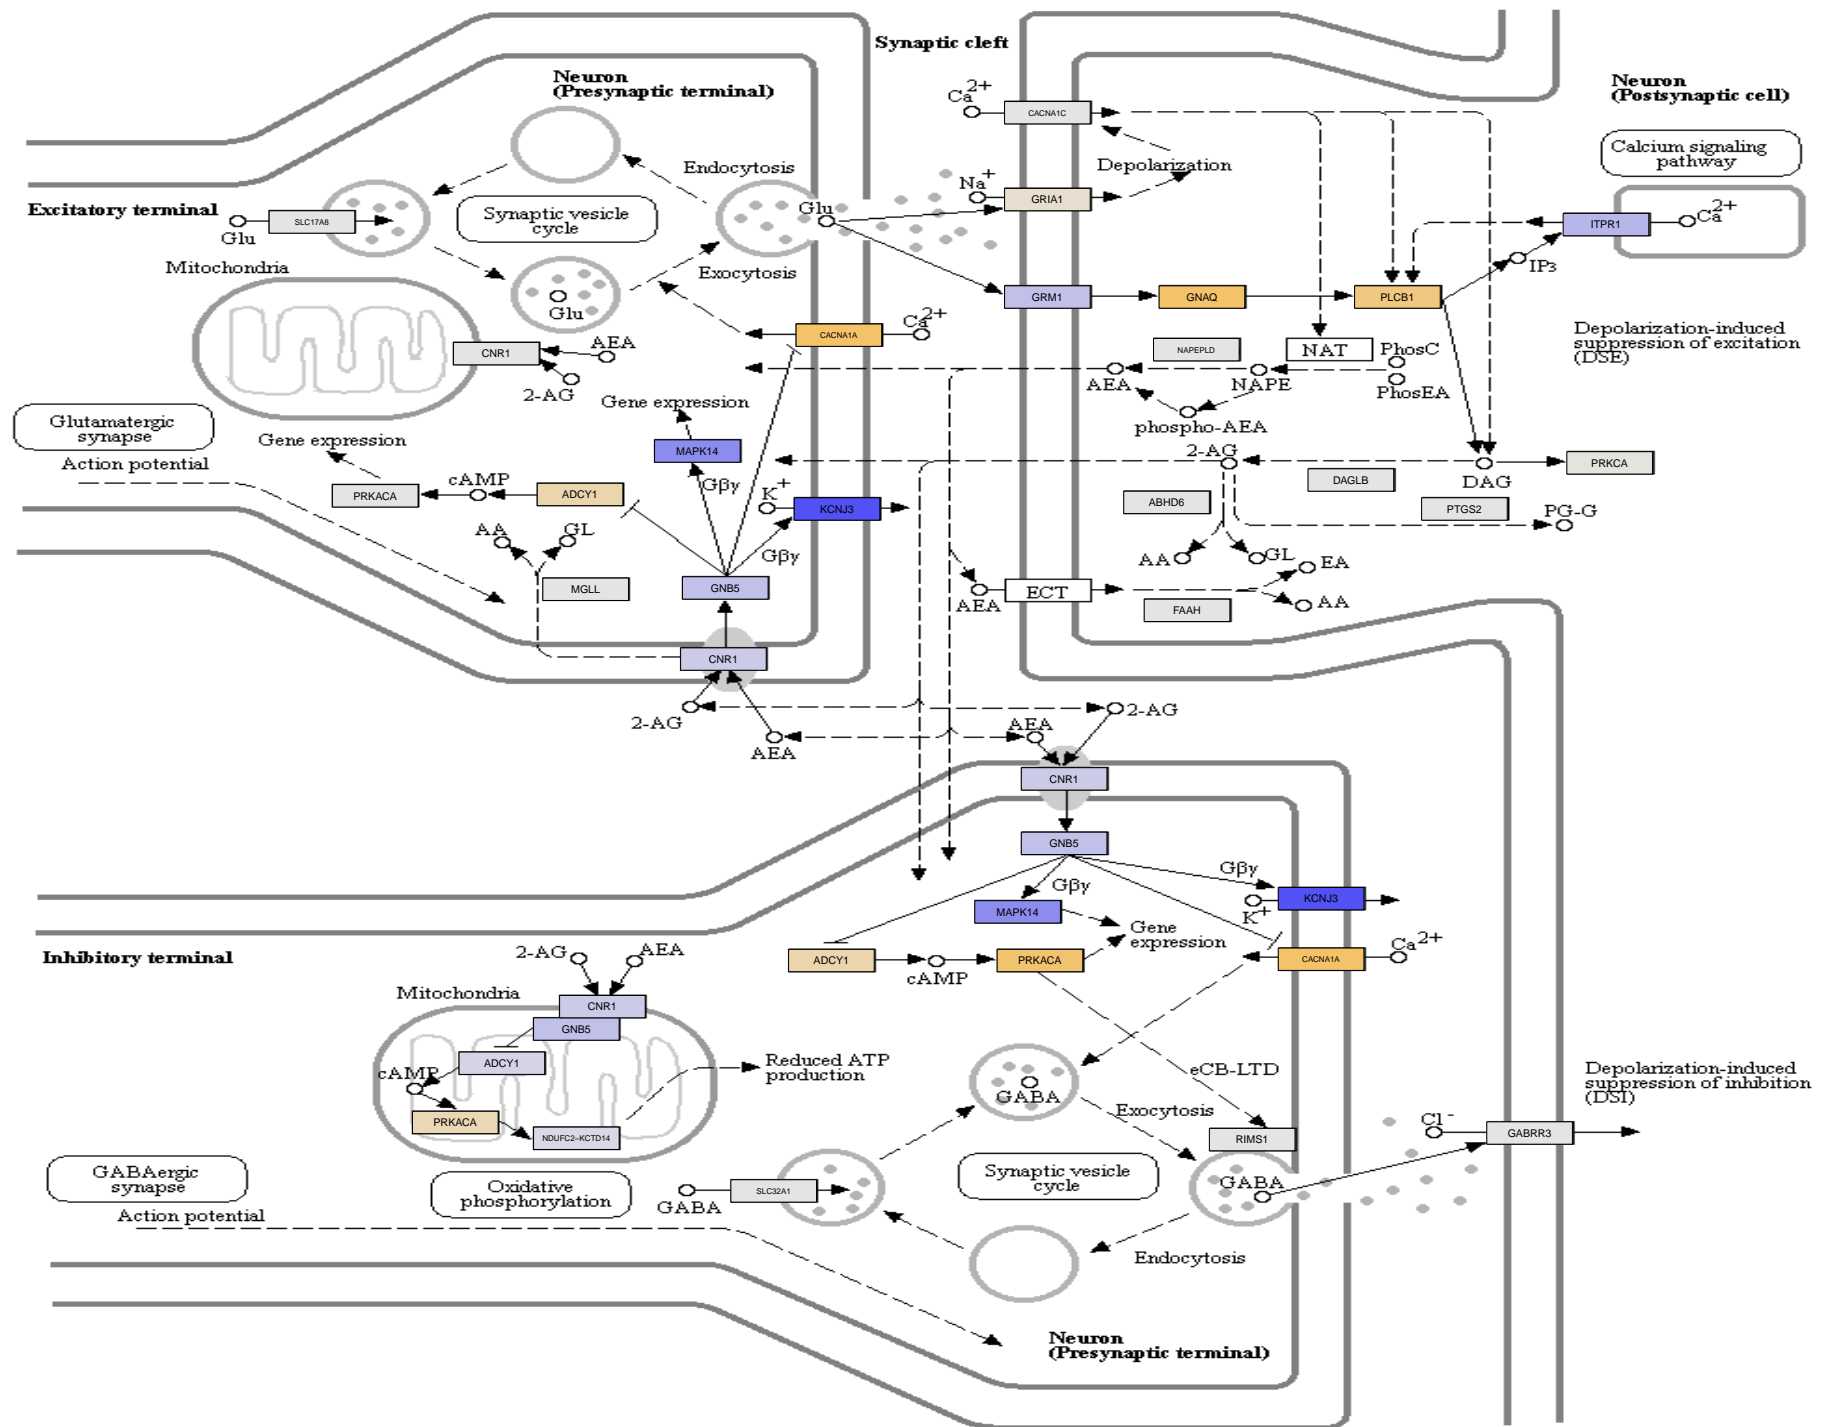

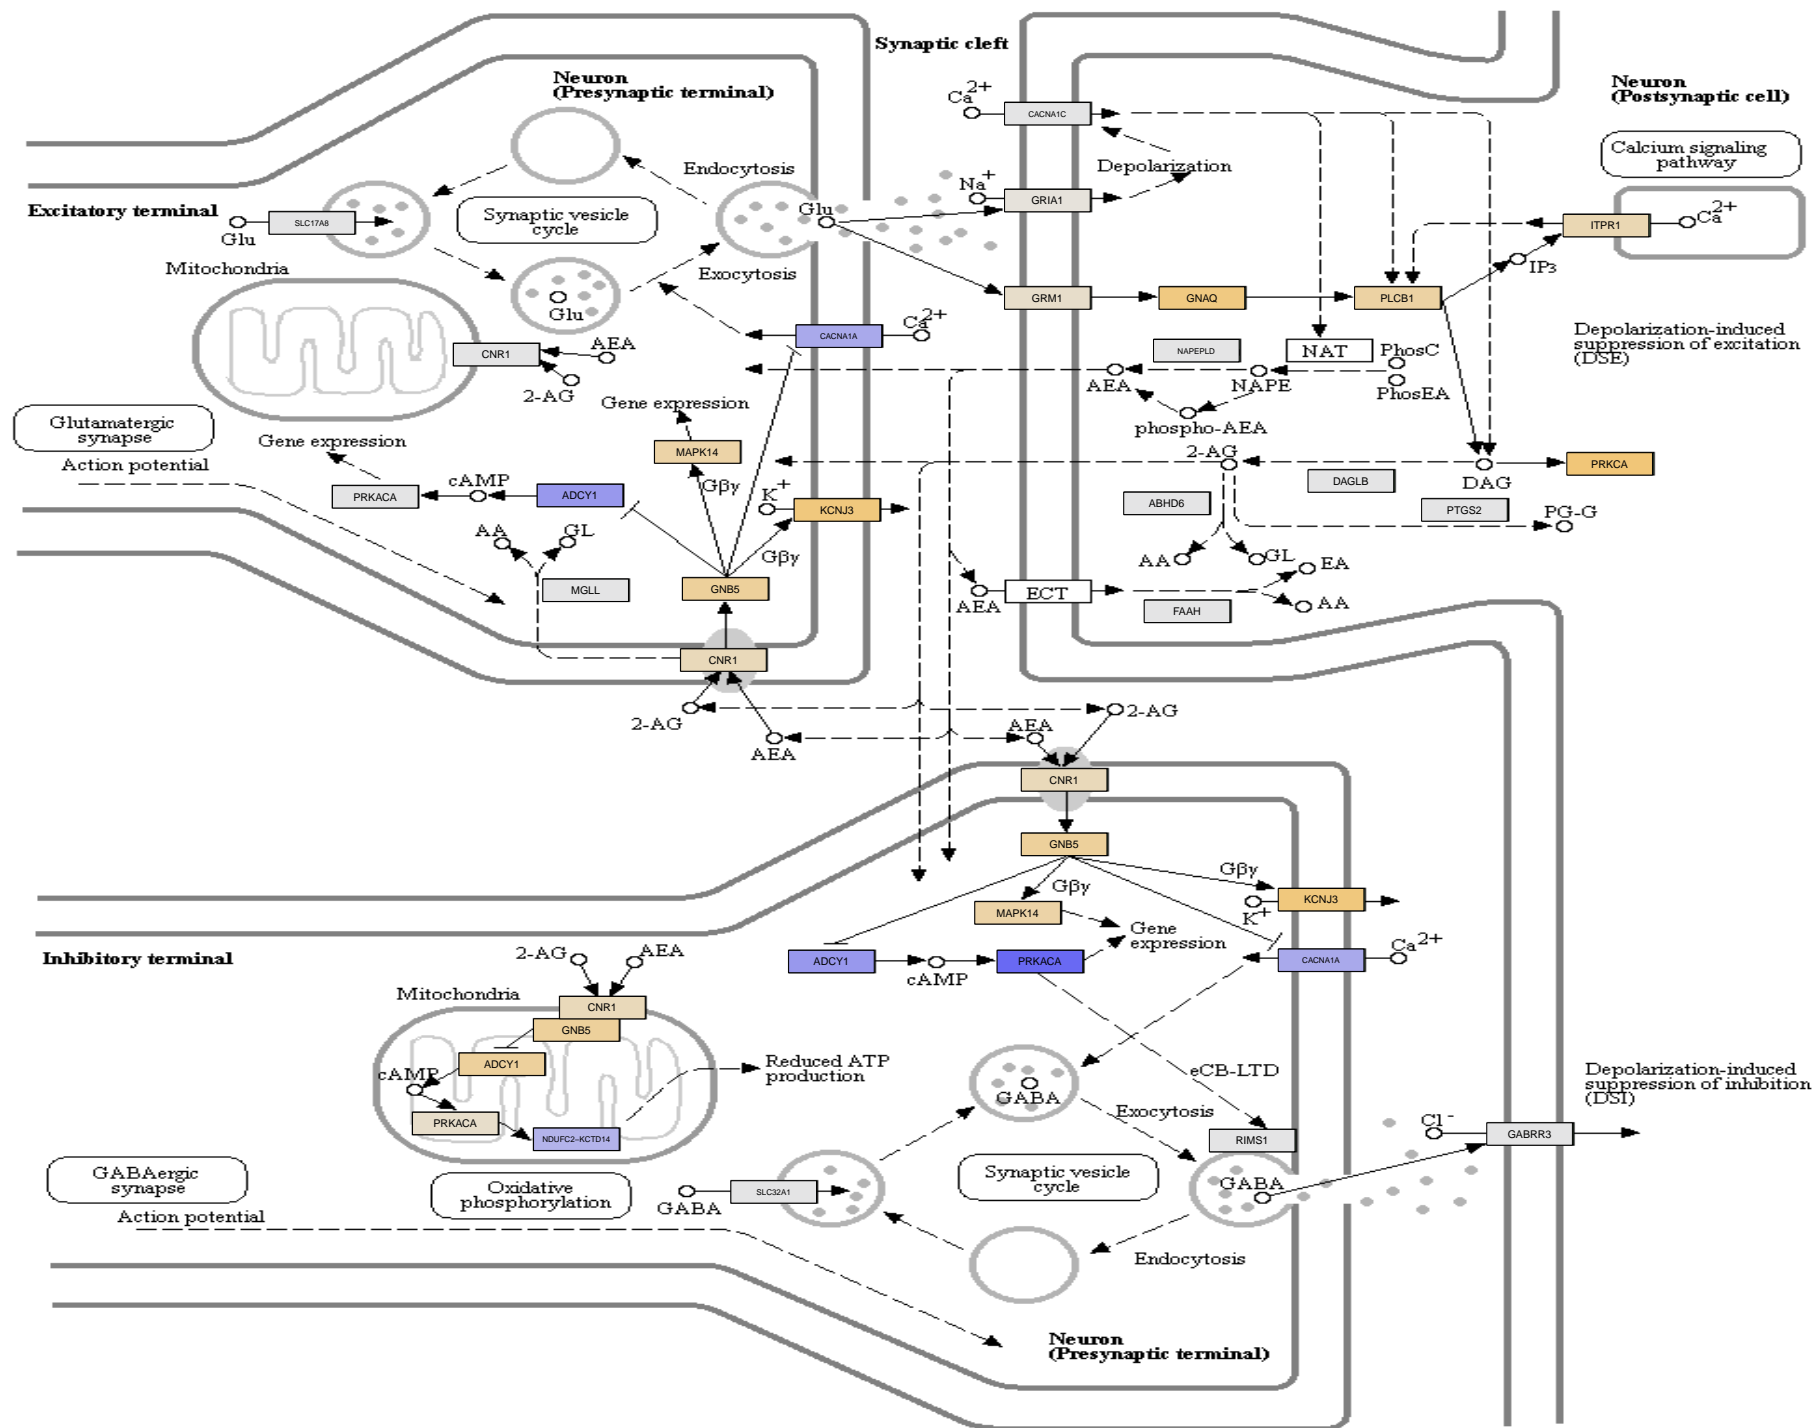



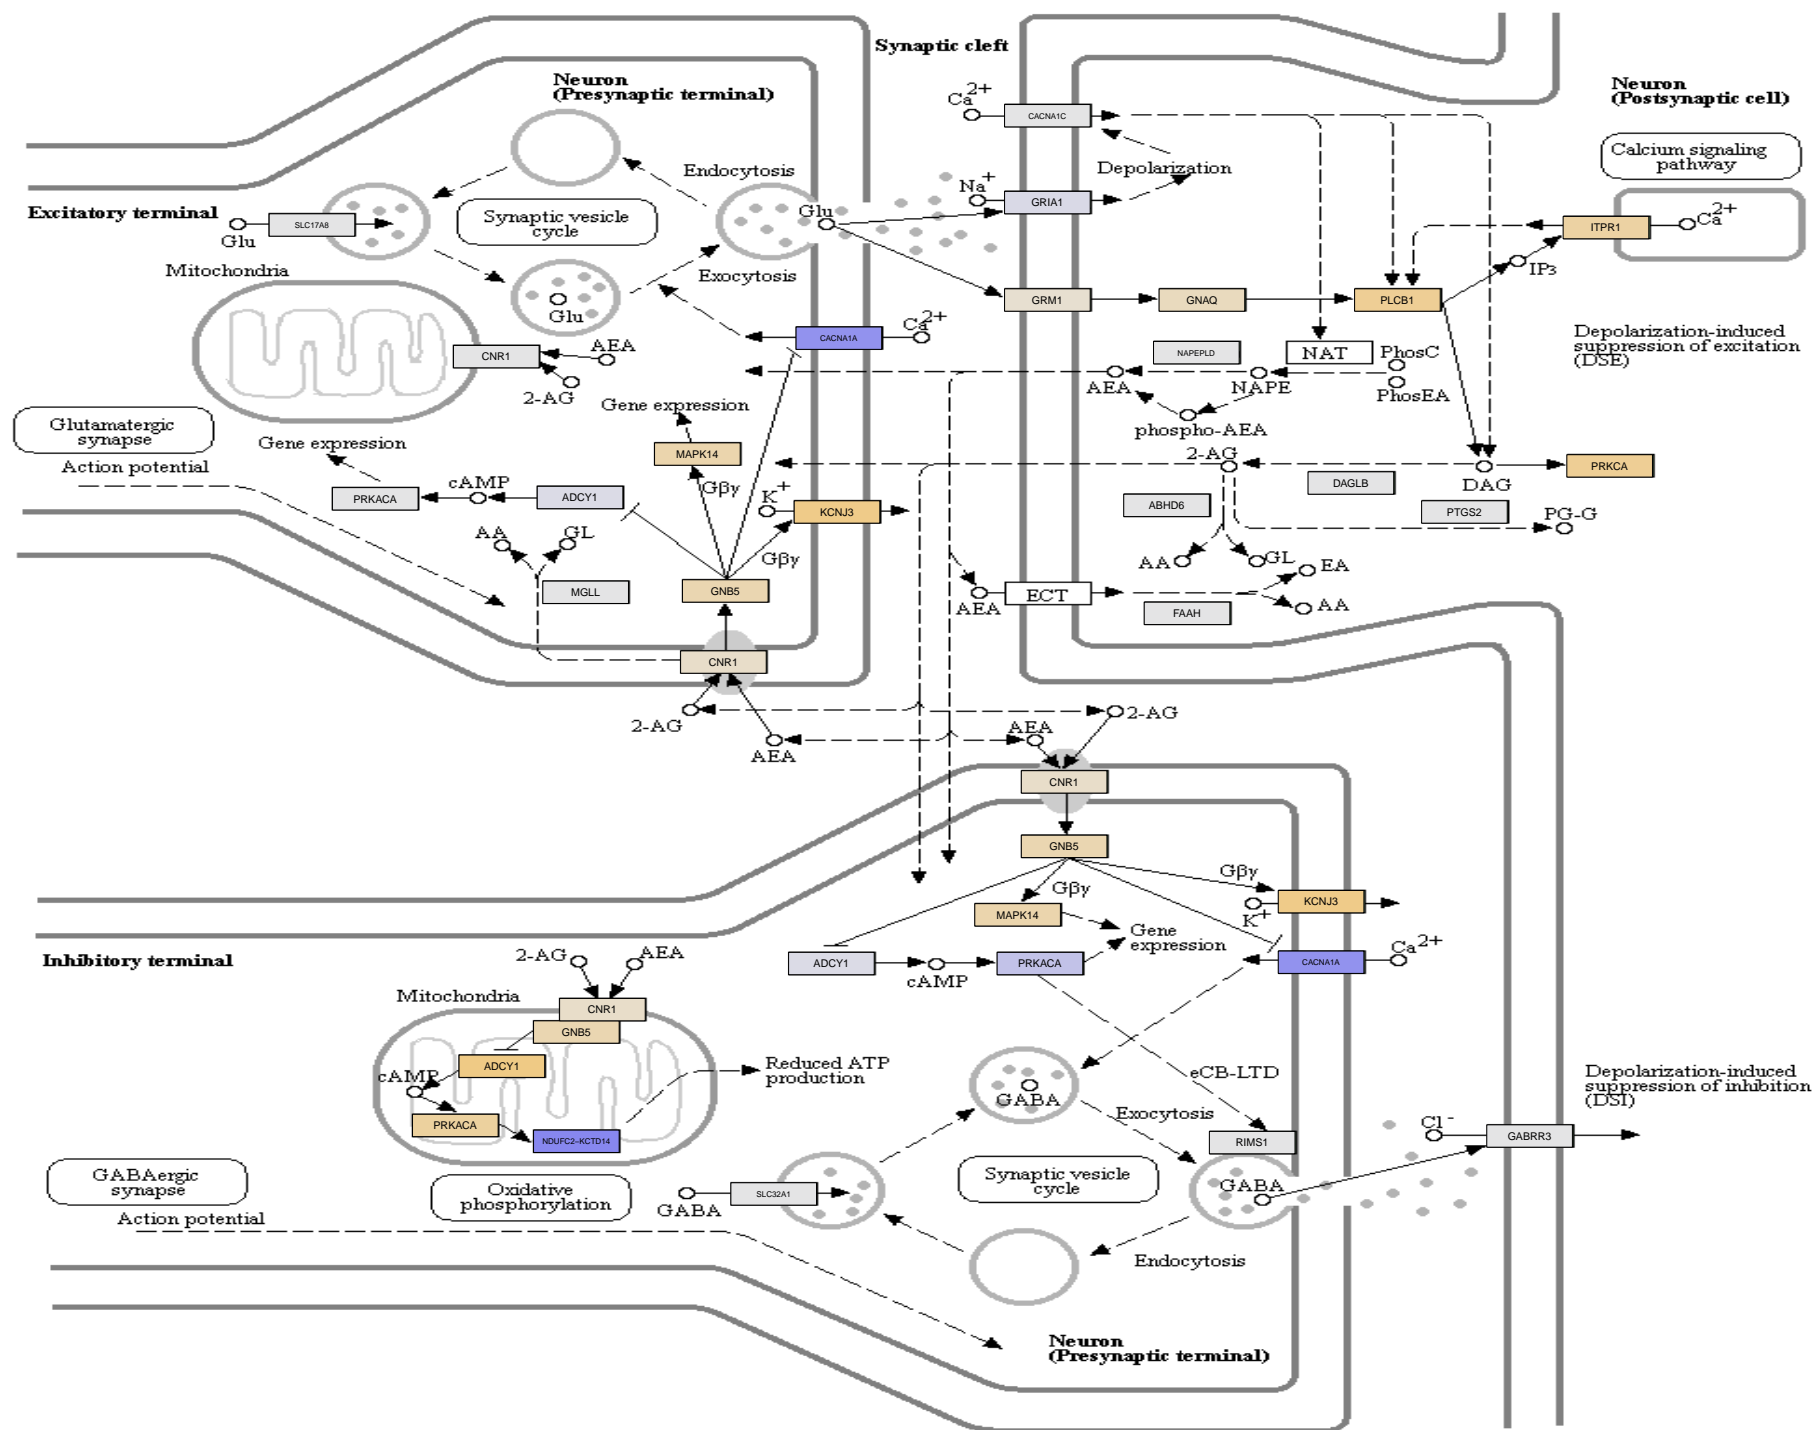

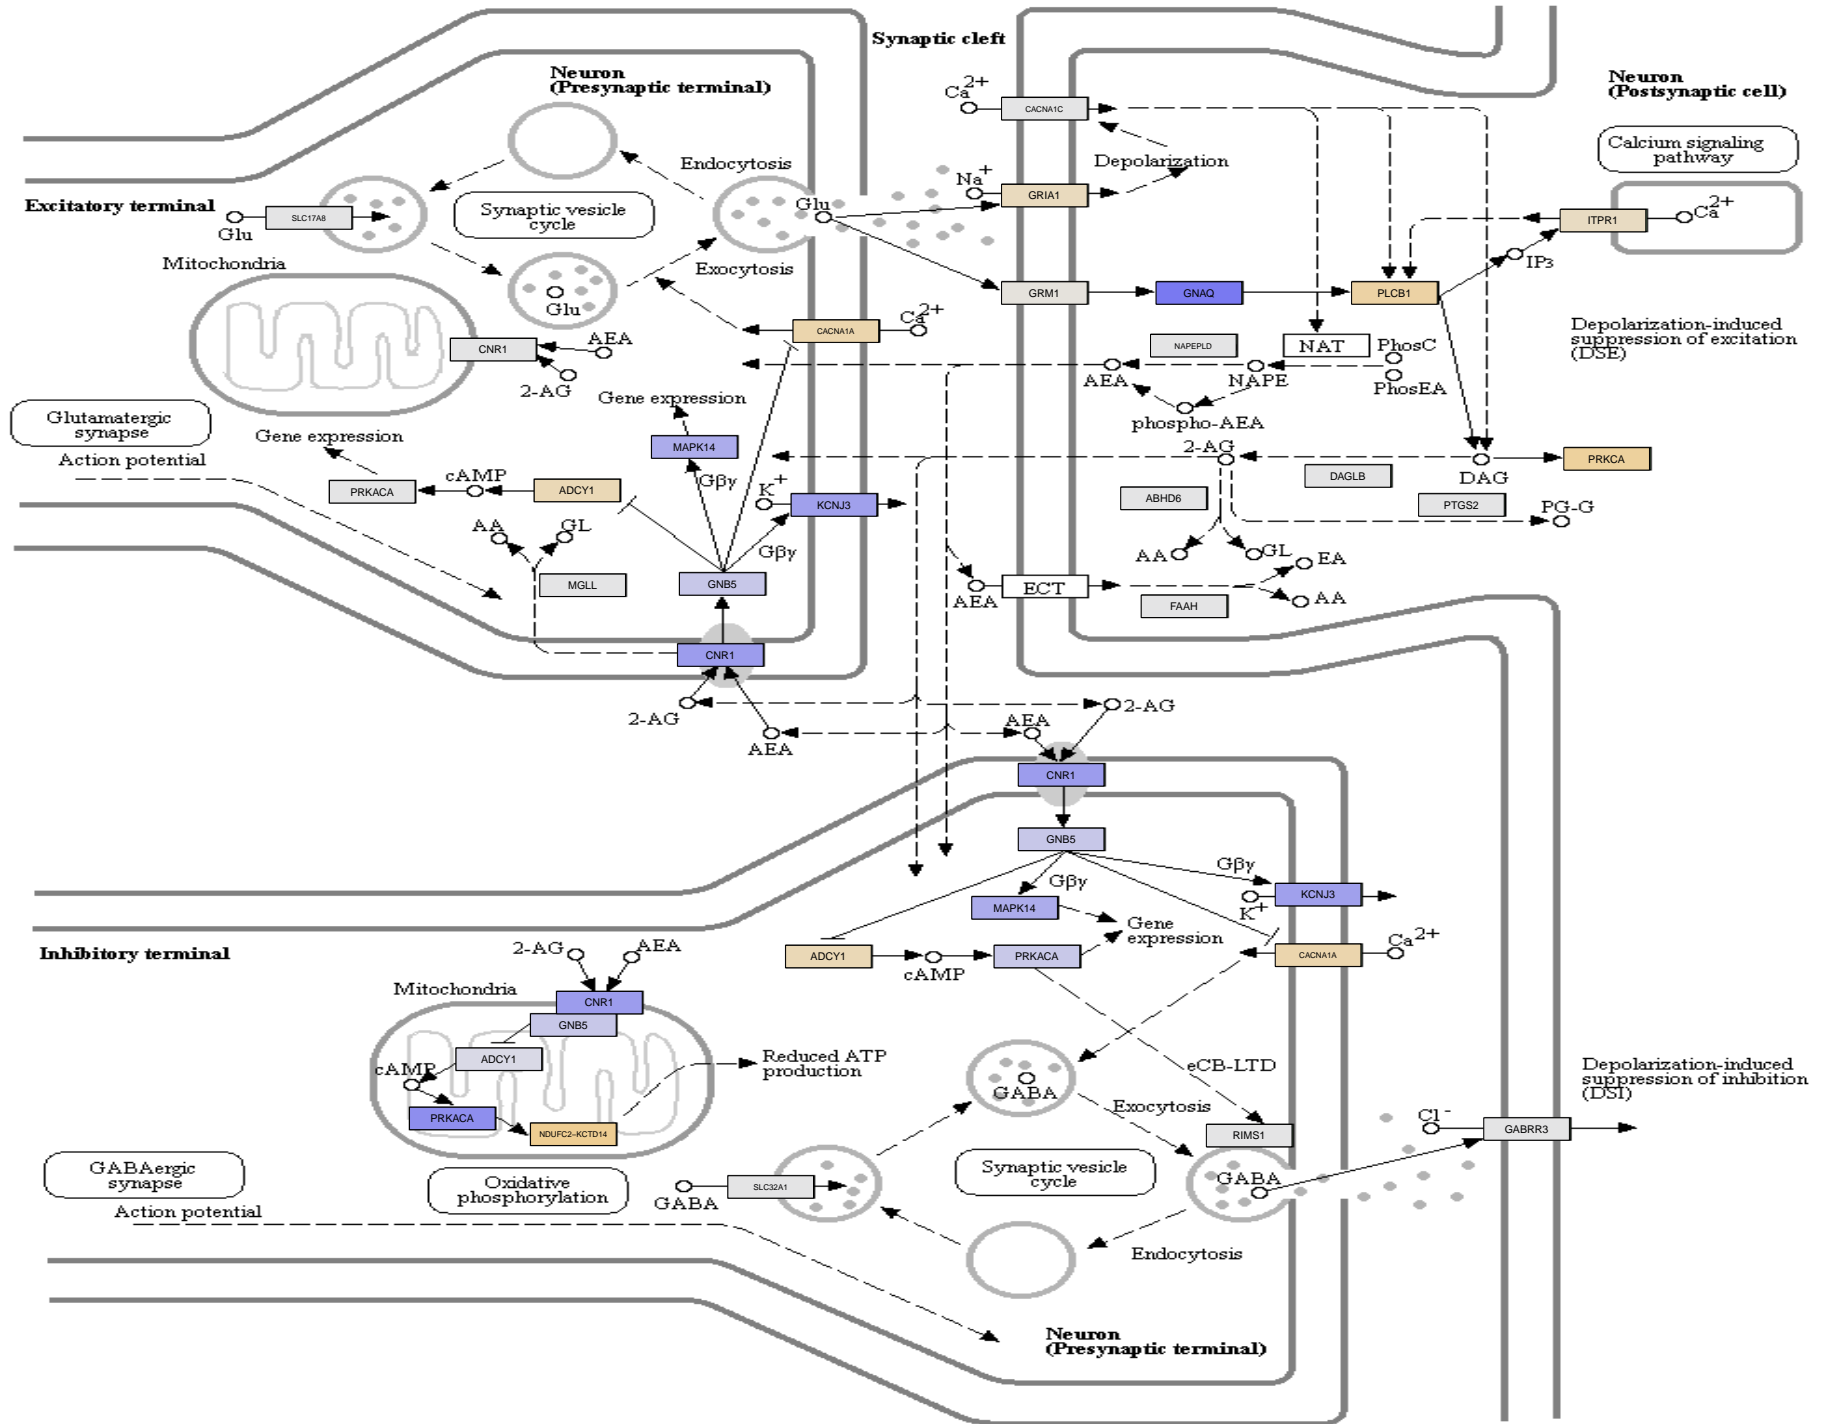

Supplement: s1 [file s1]

Sphingolipid signaling pathway

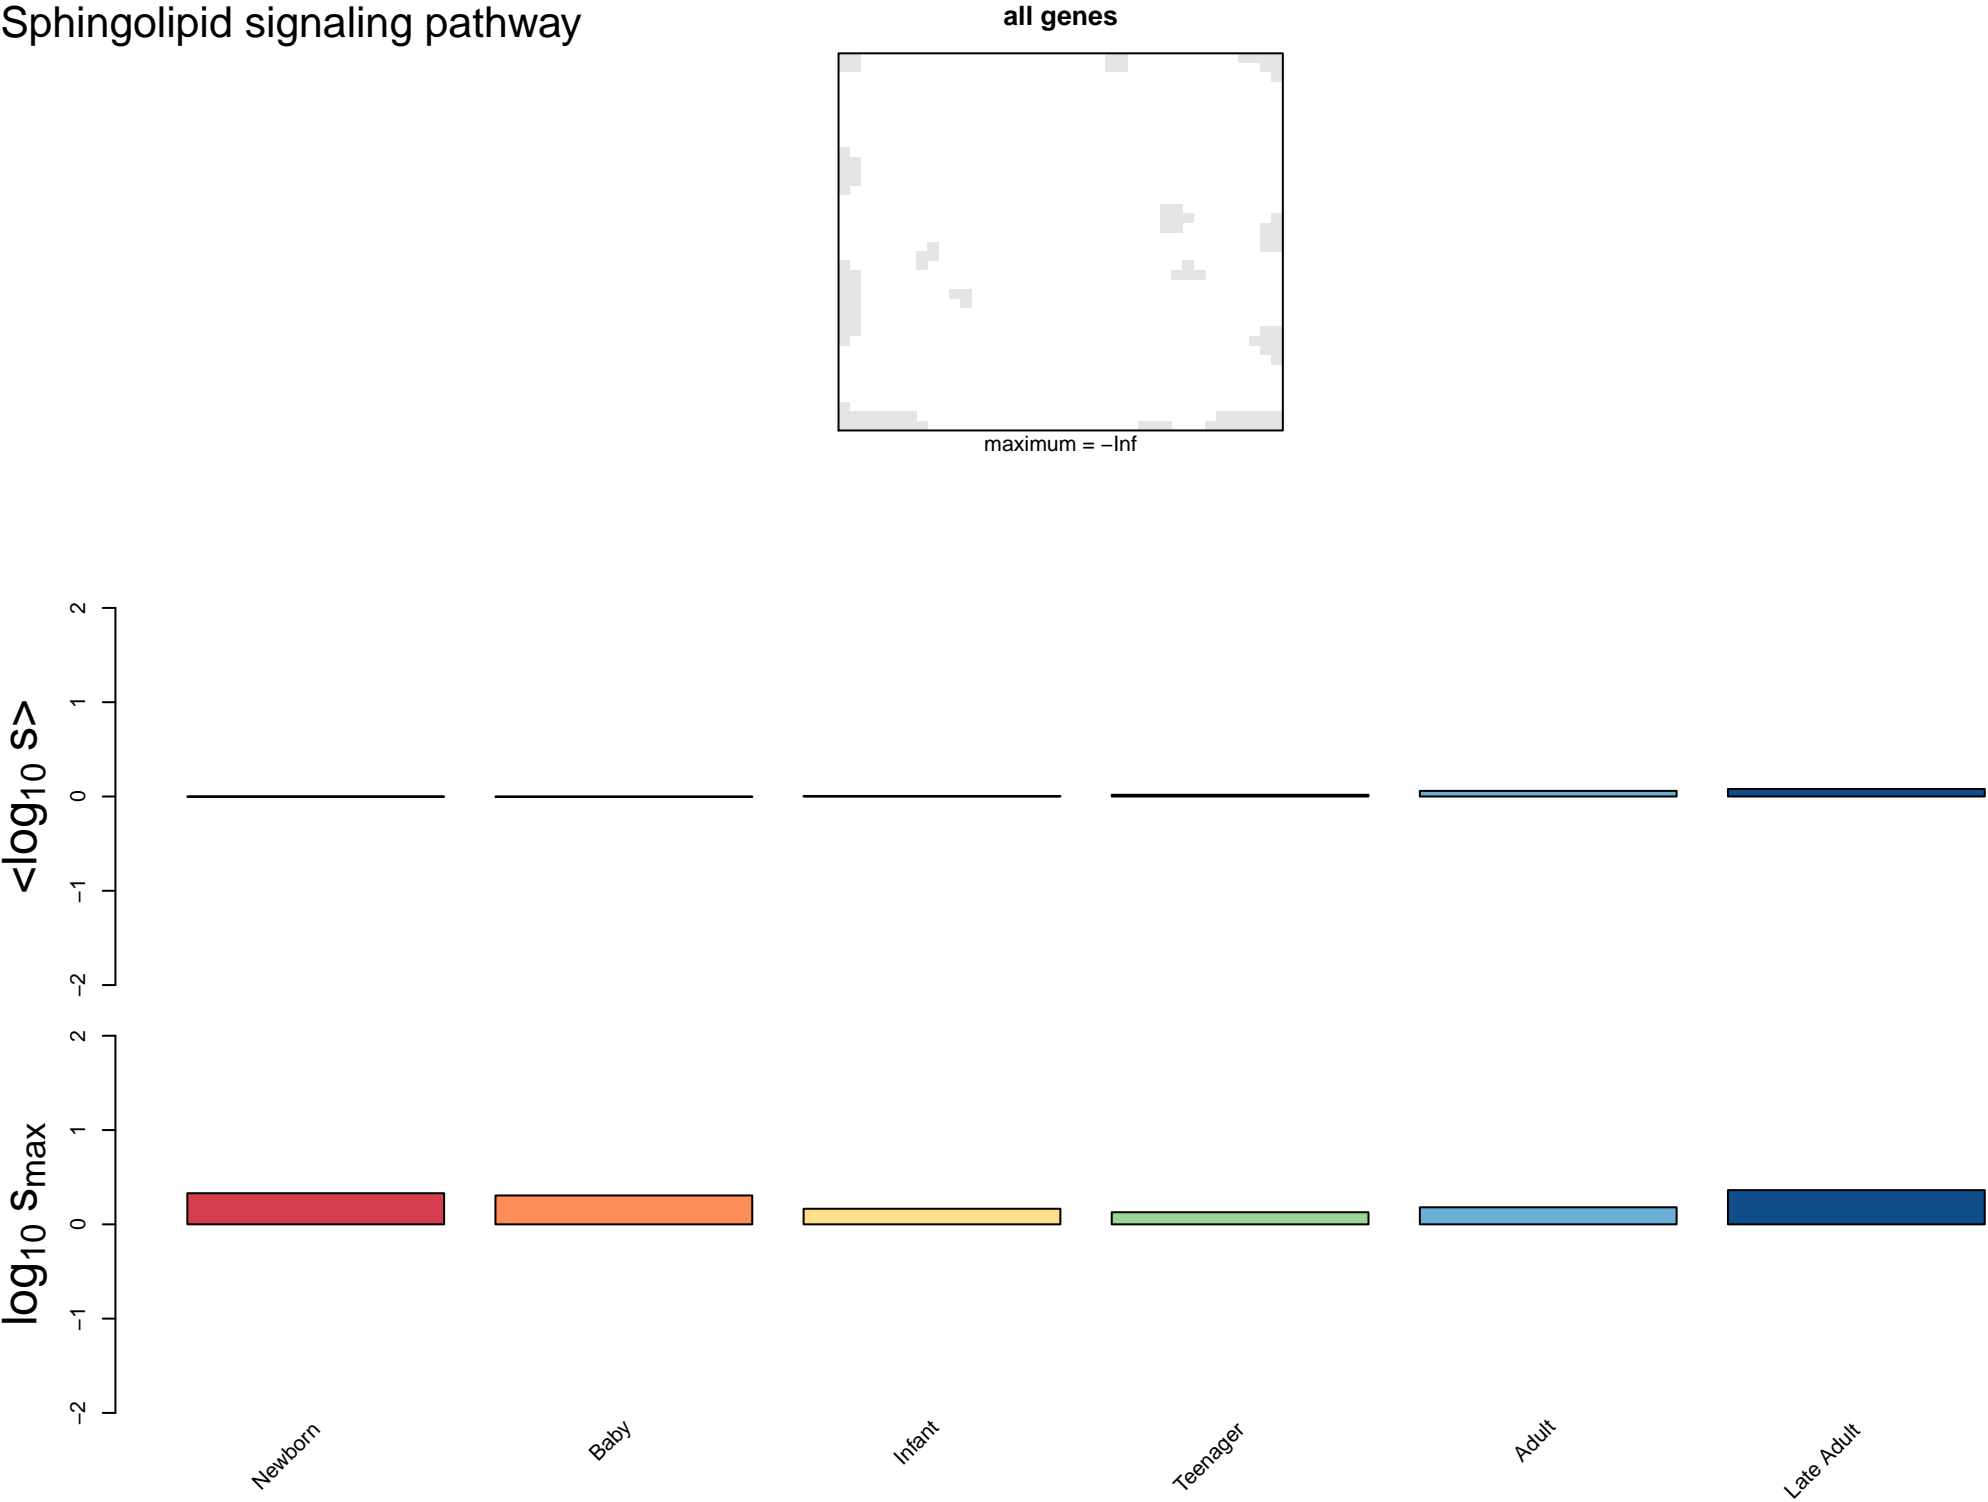

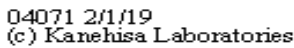

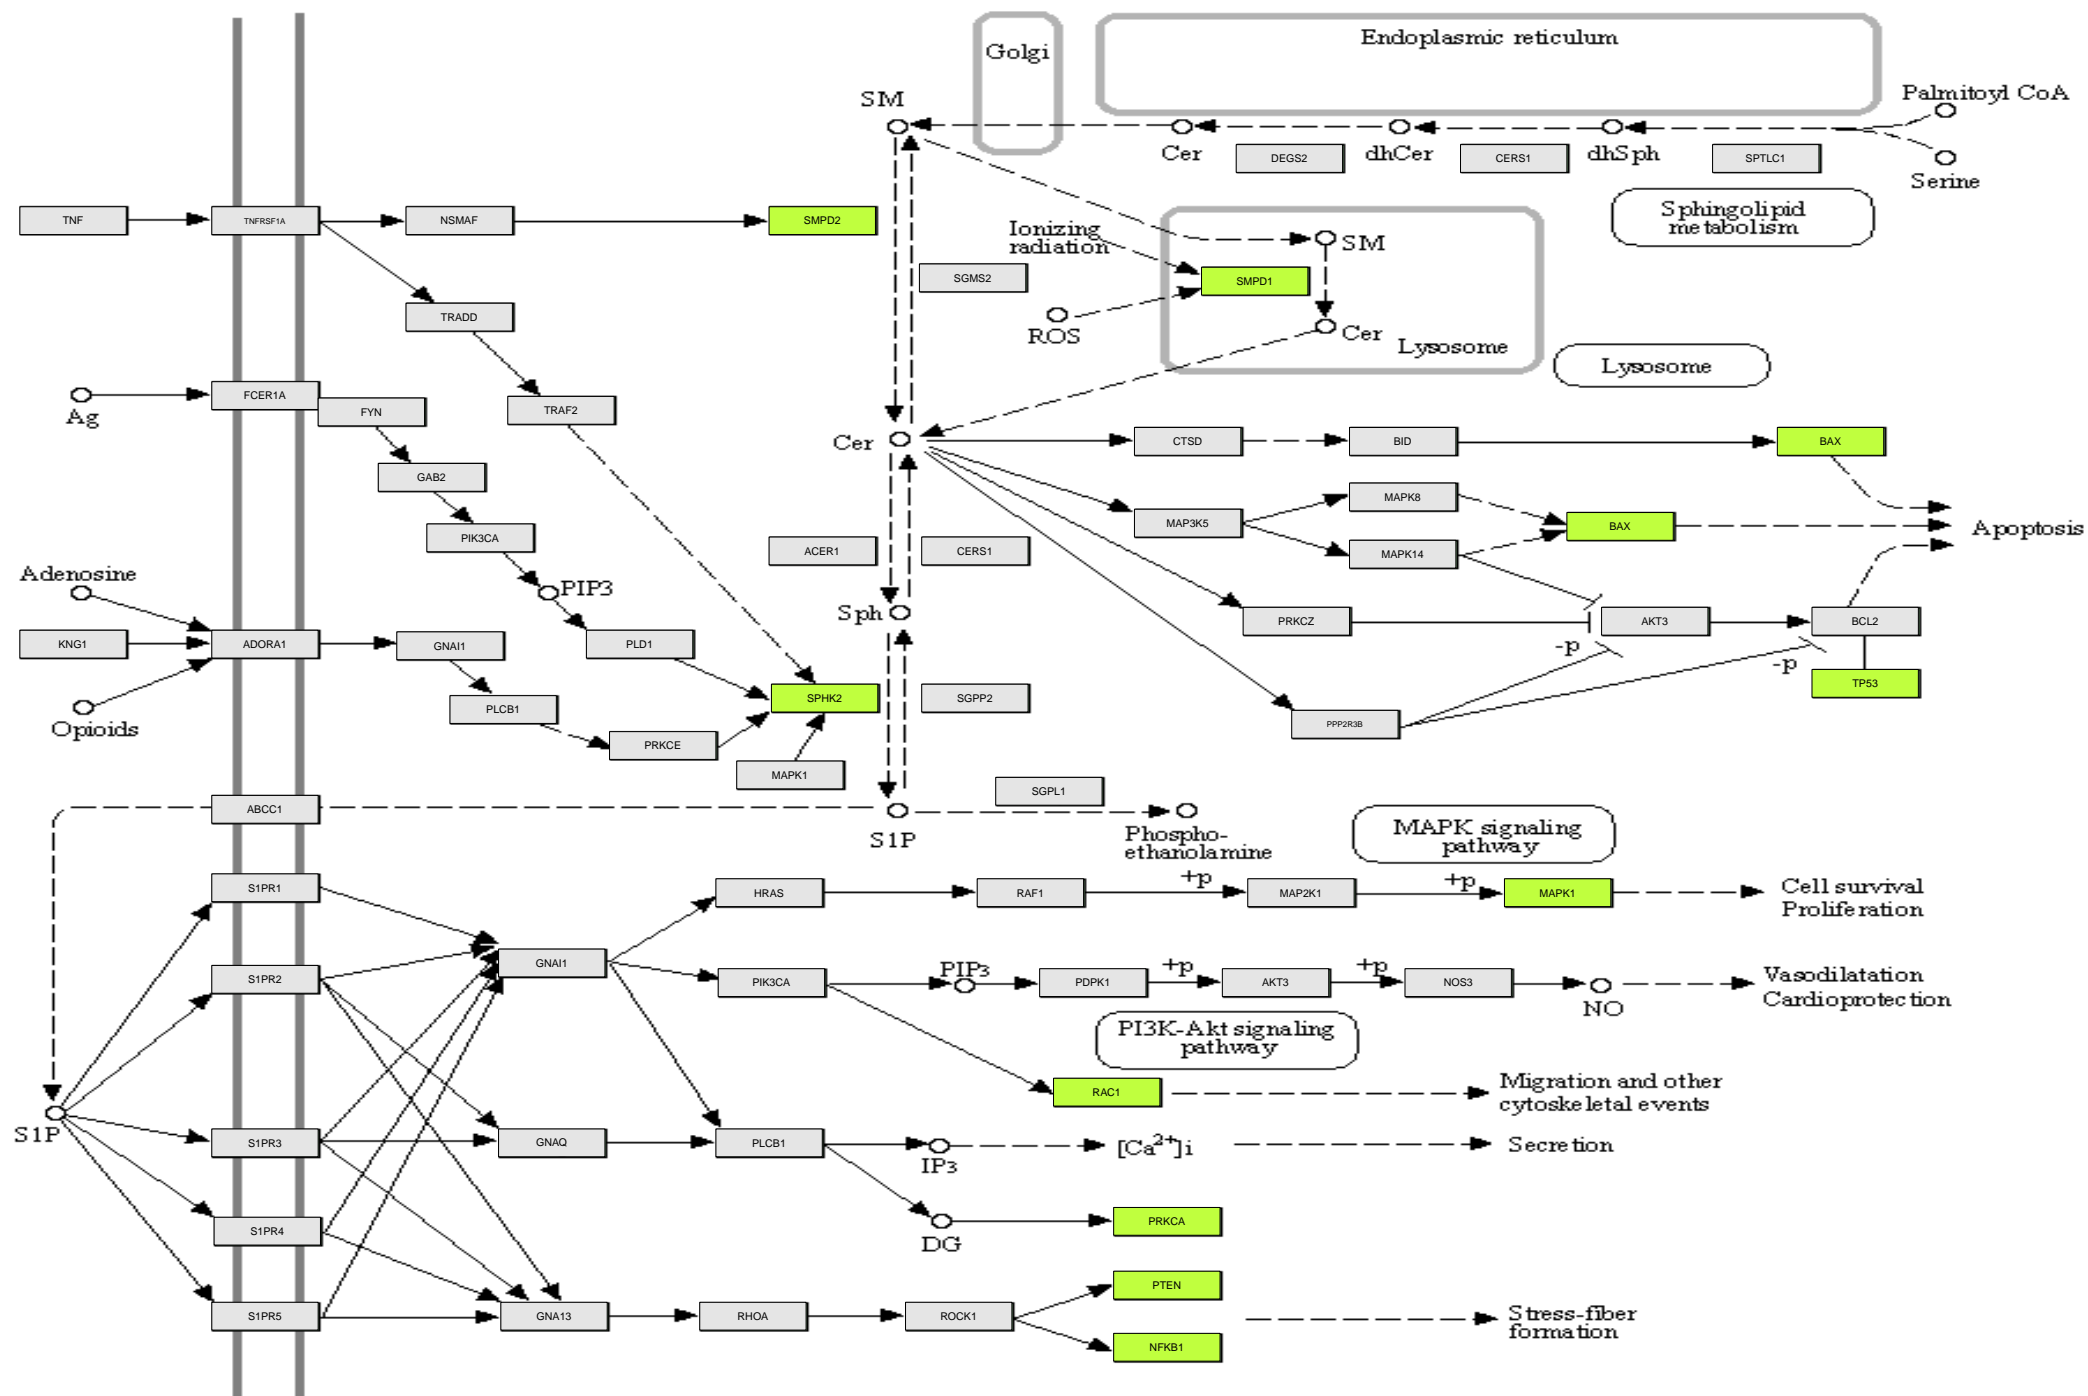

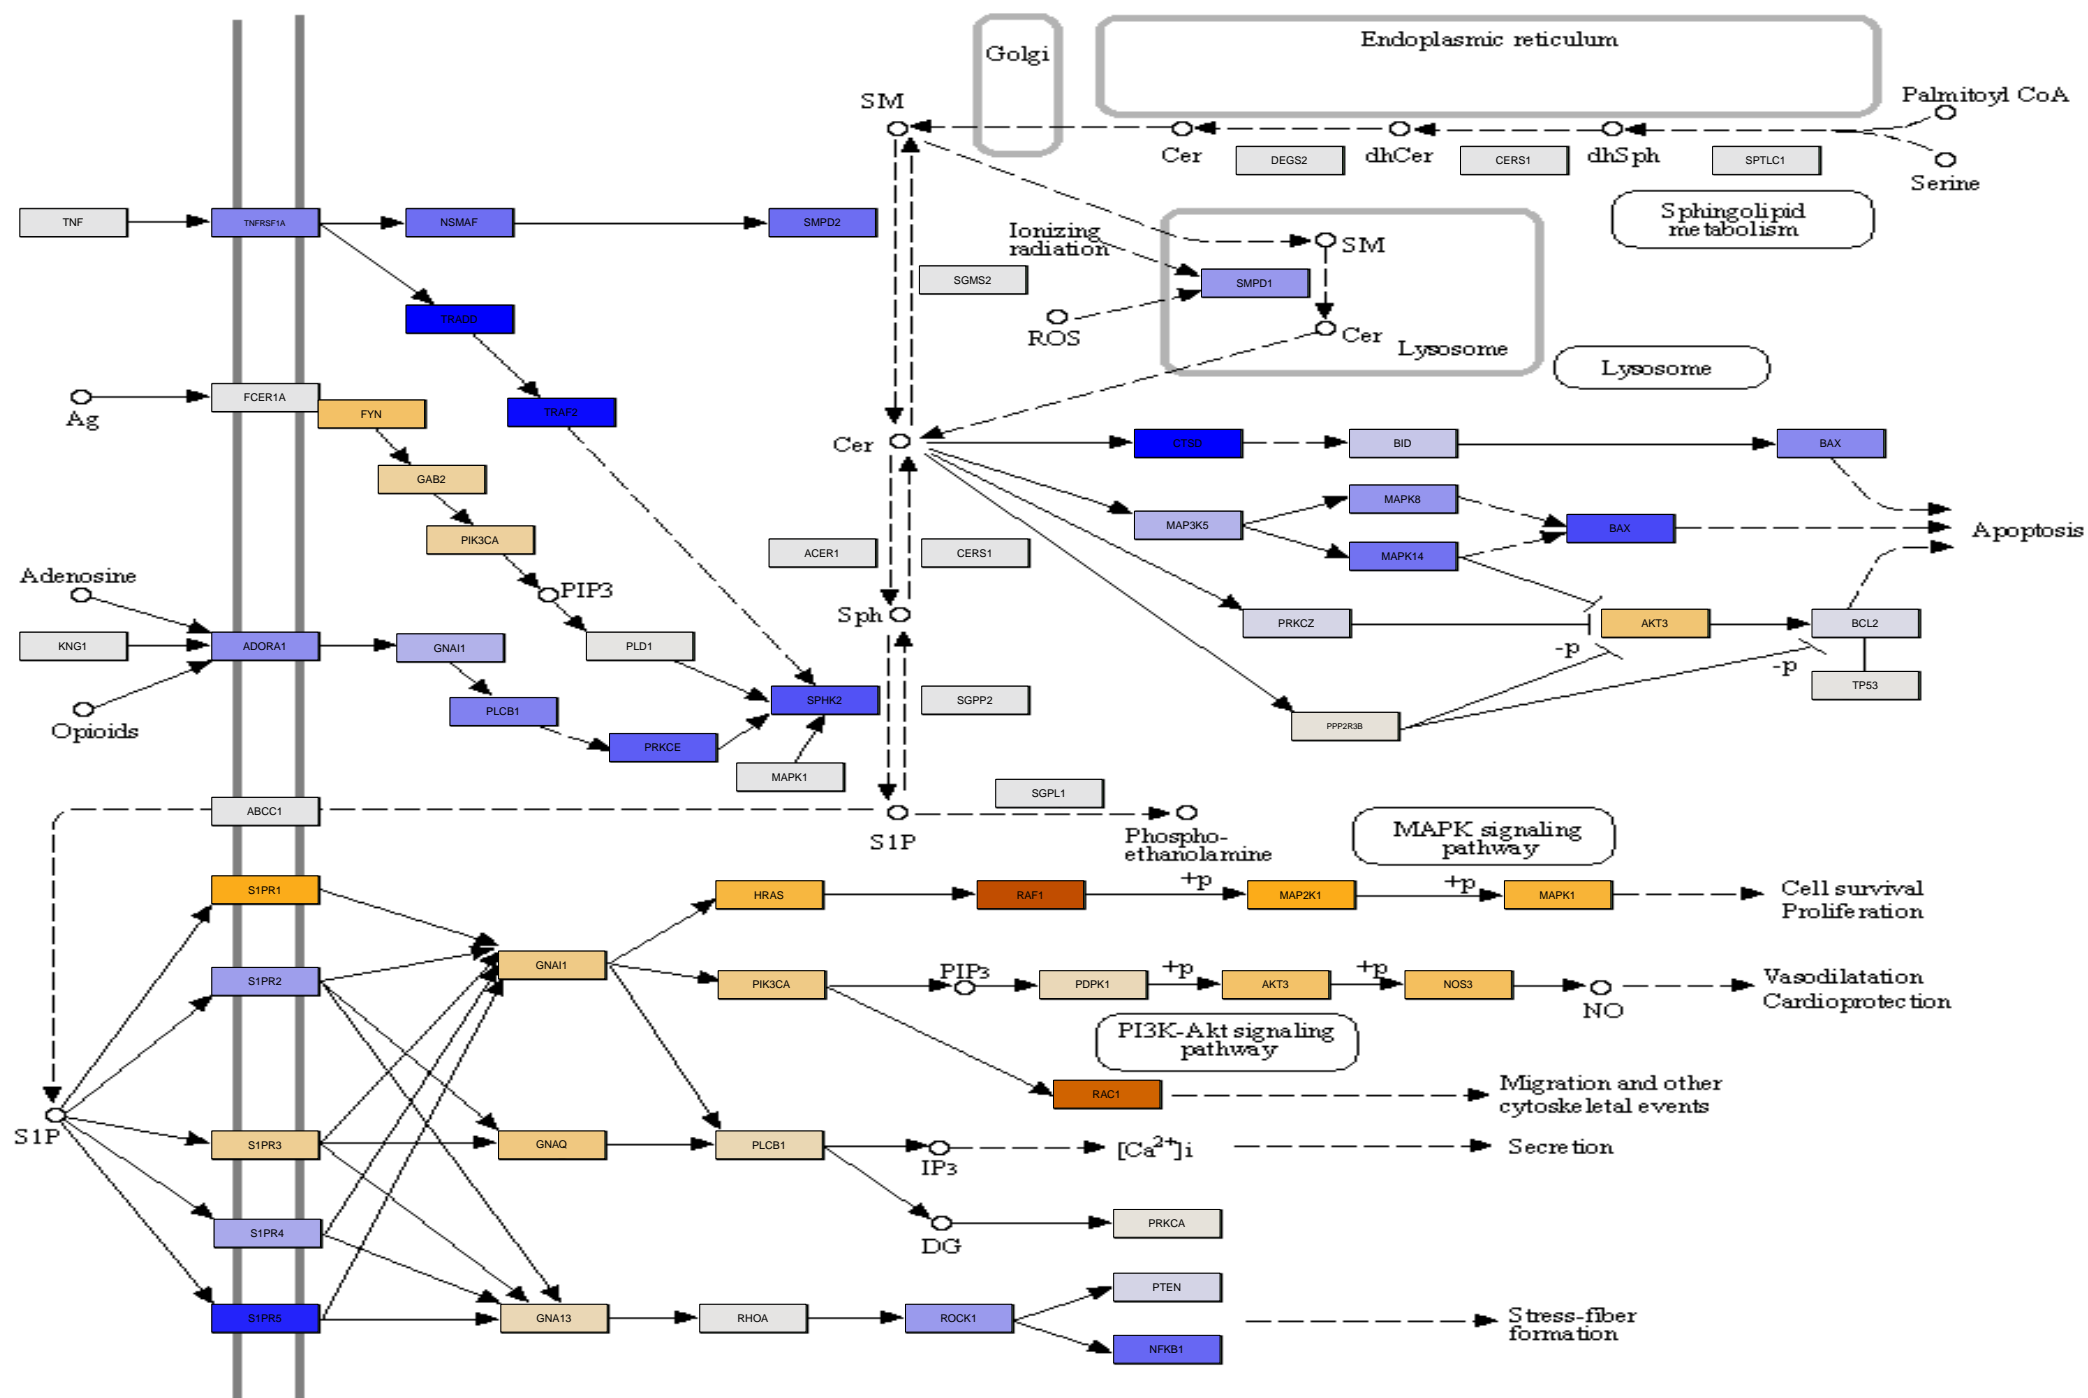

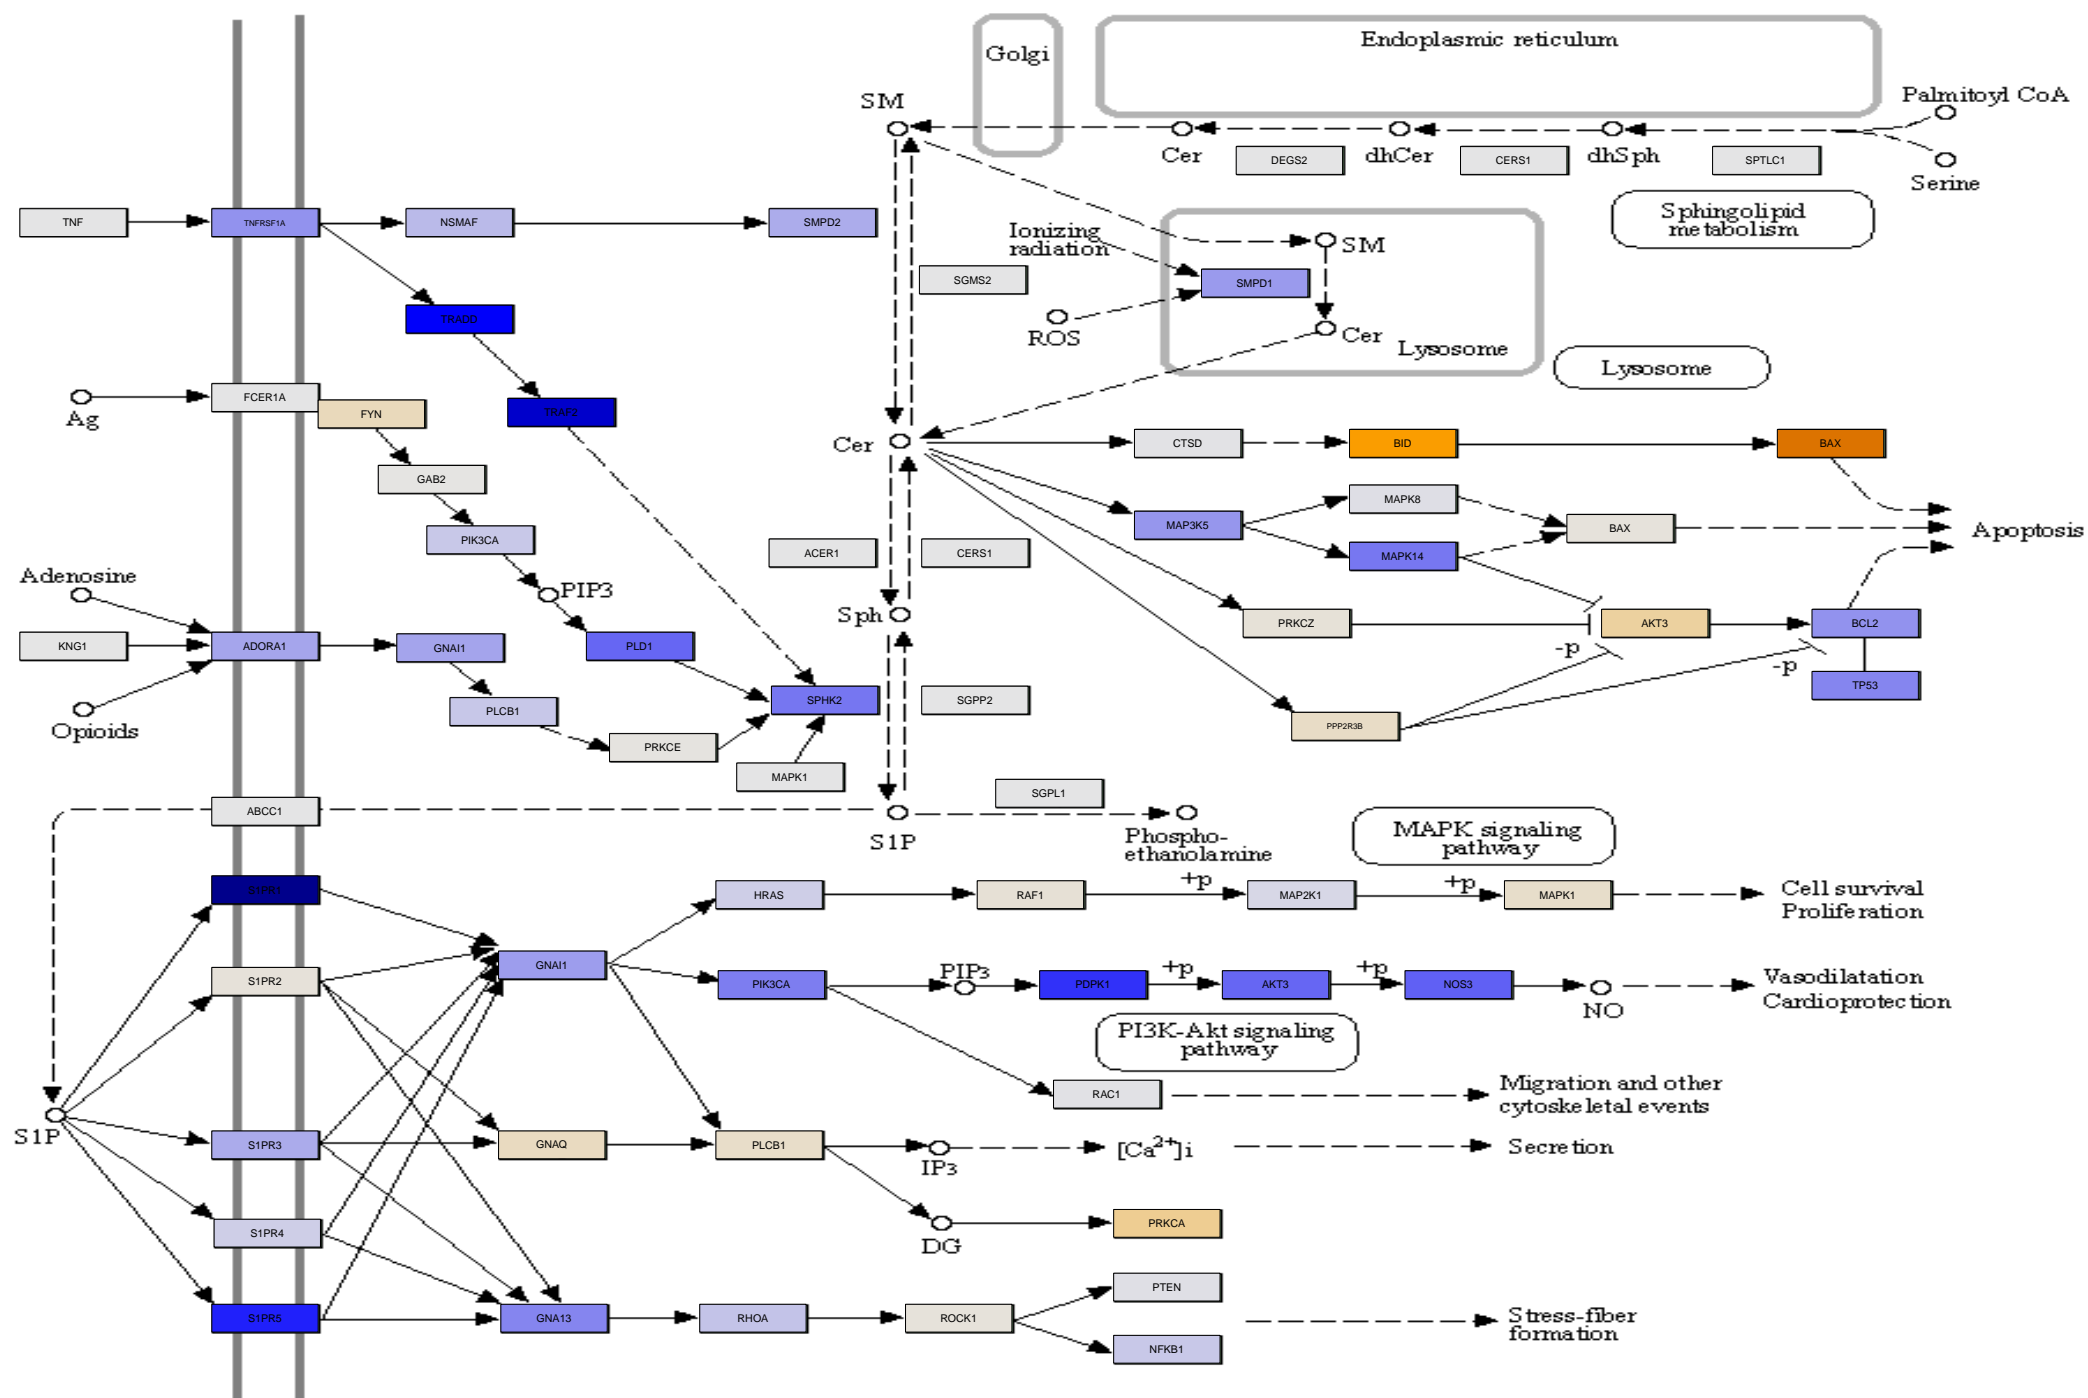



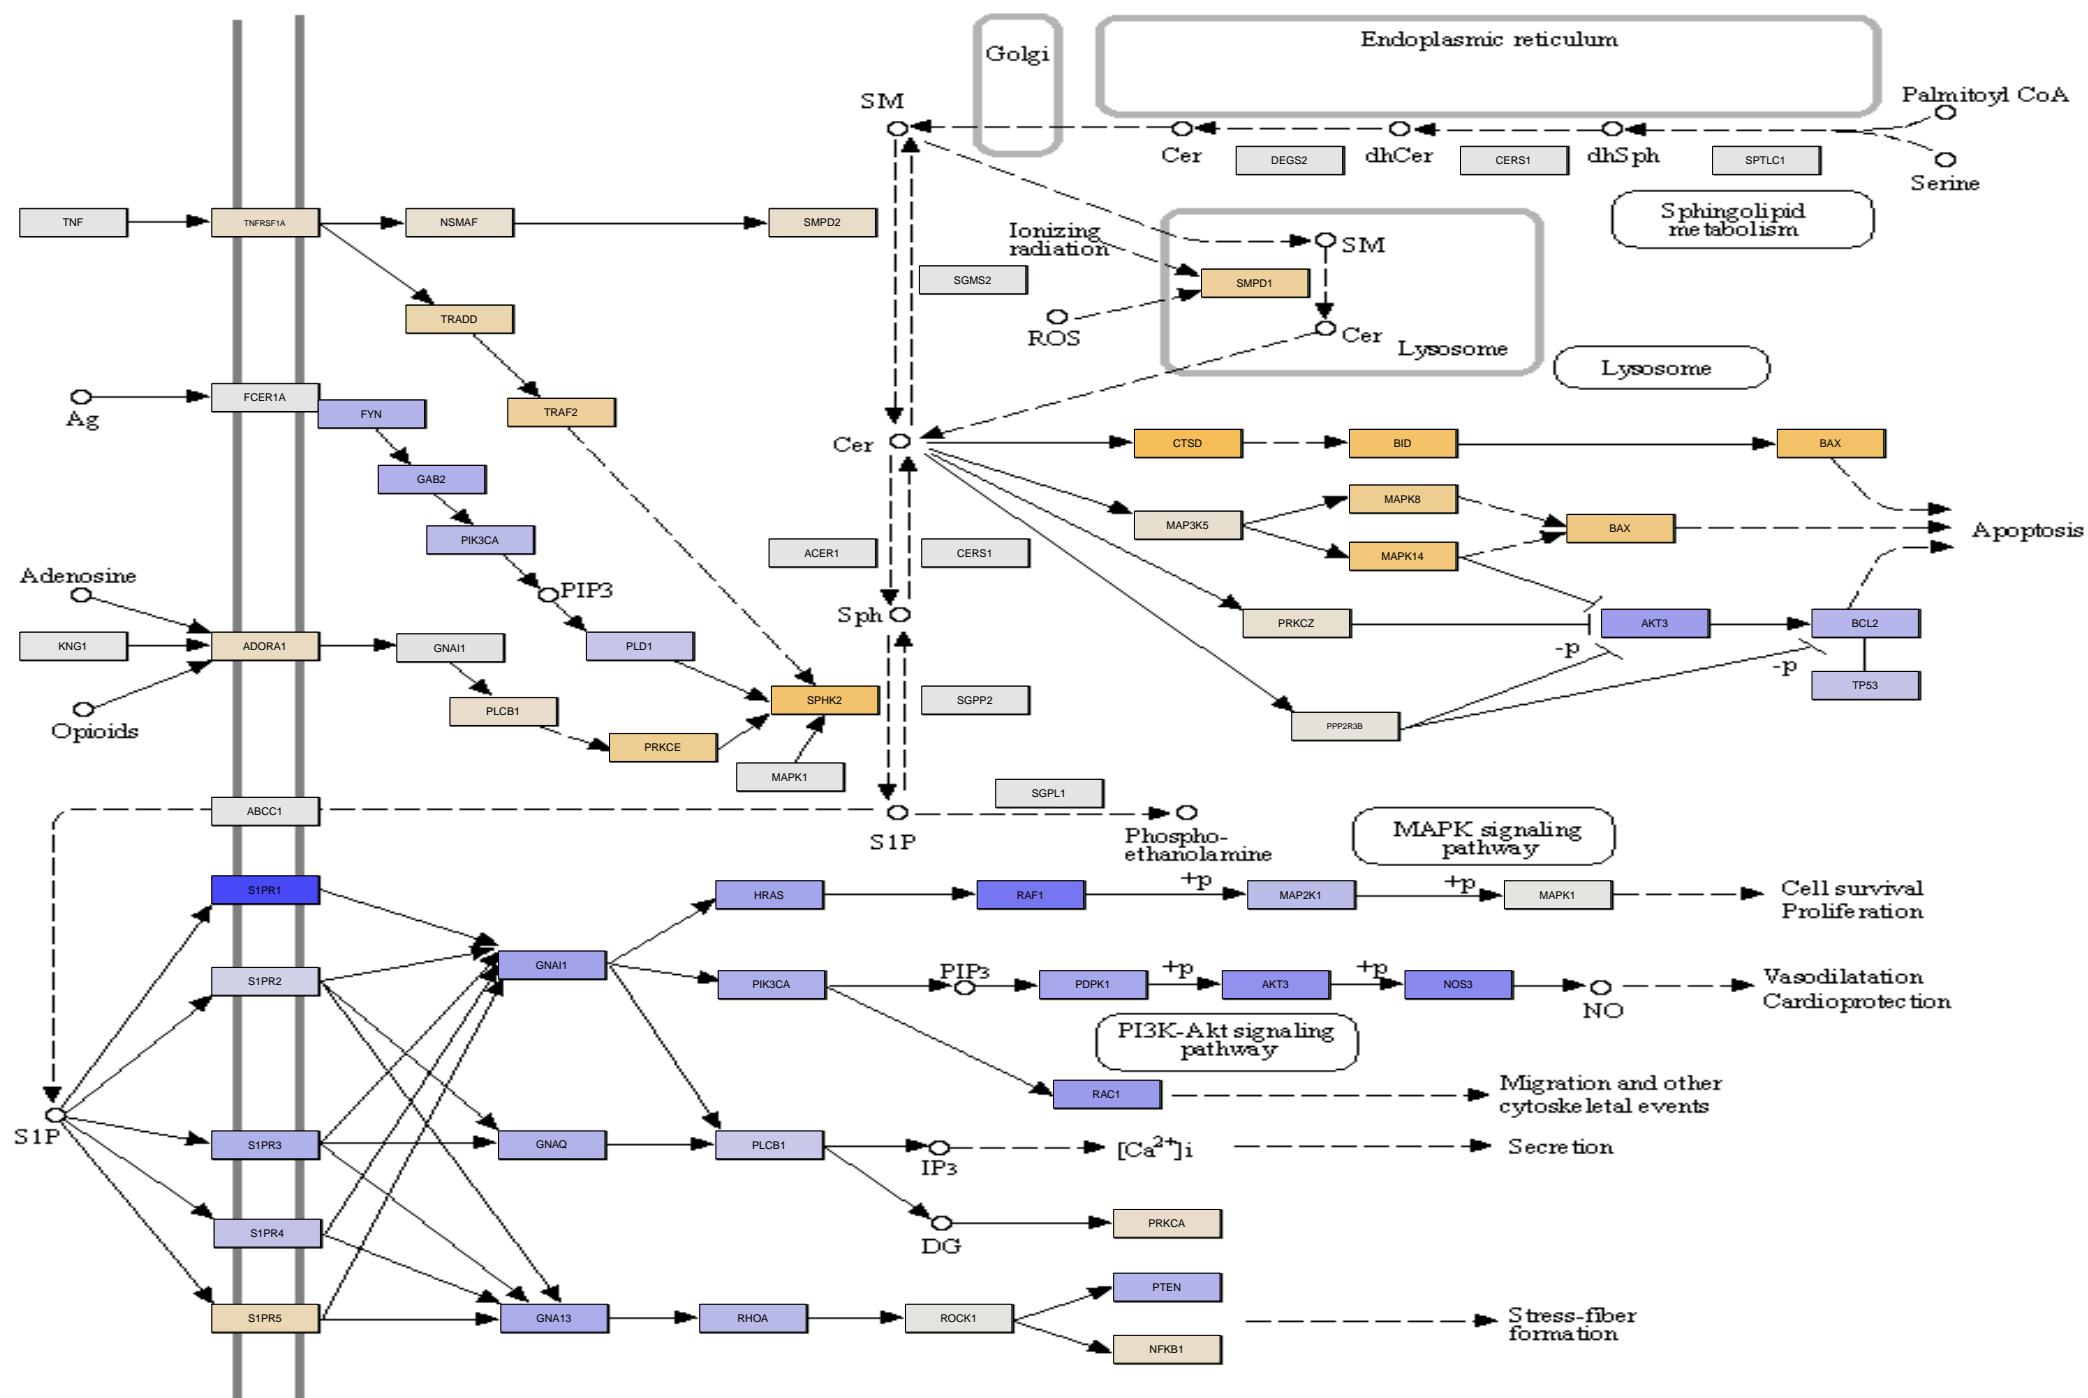

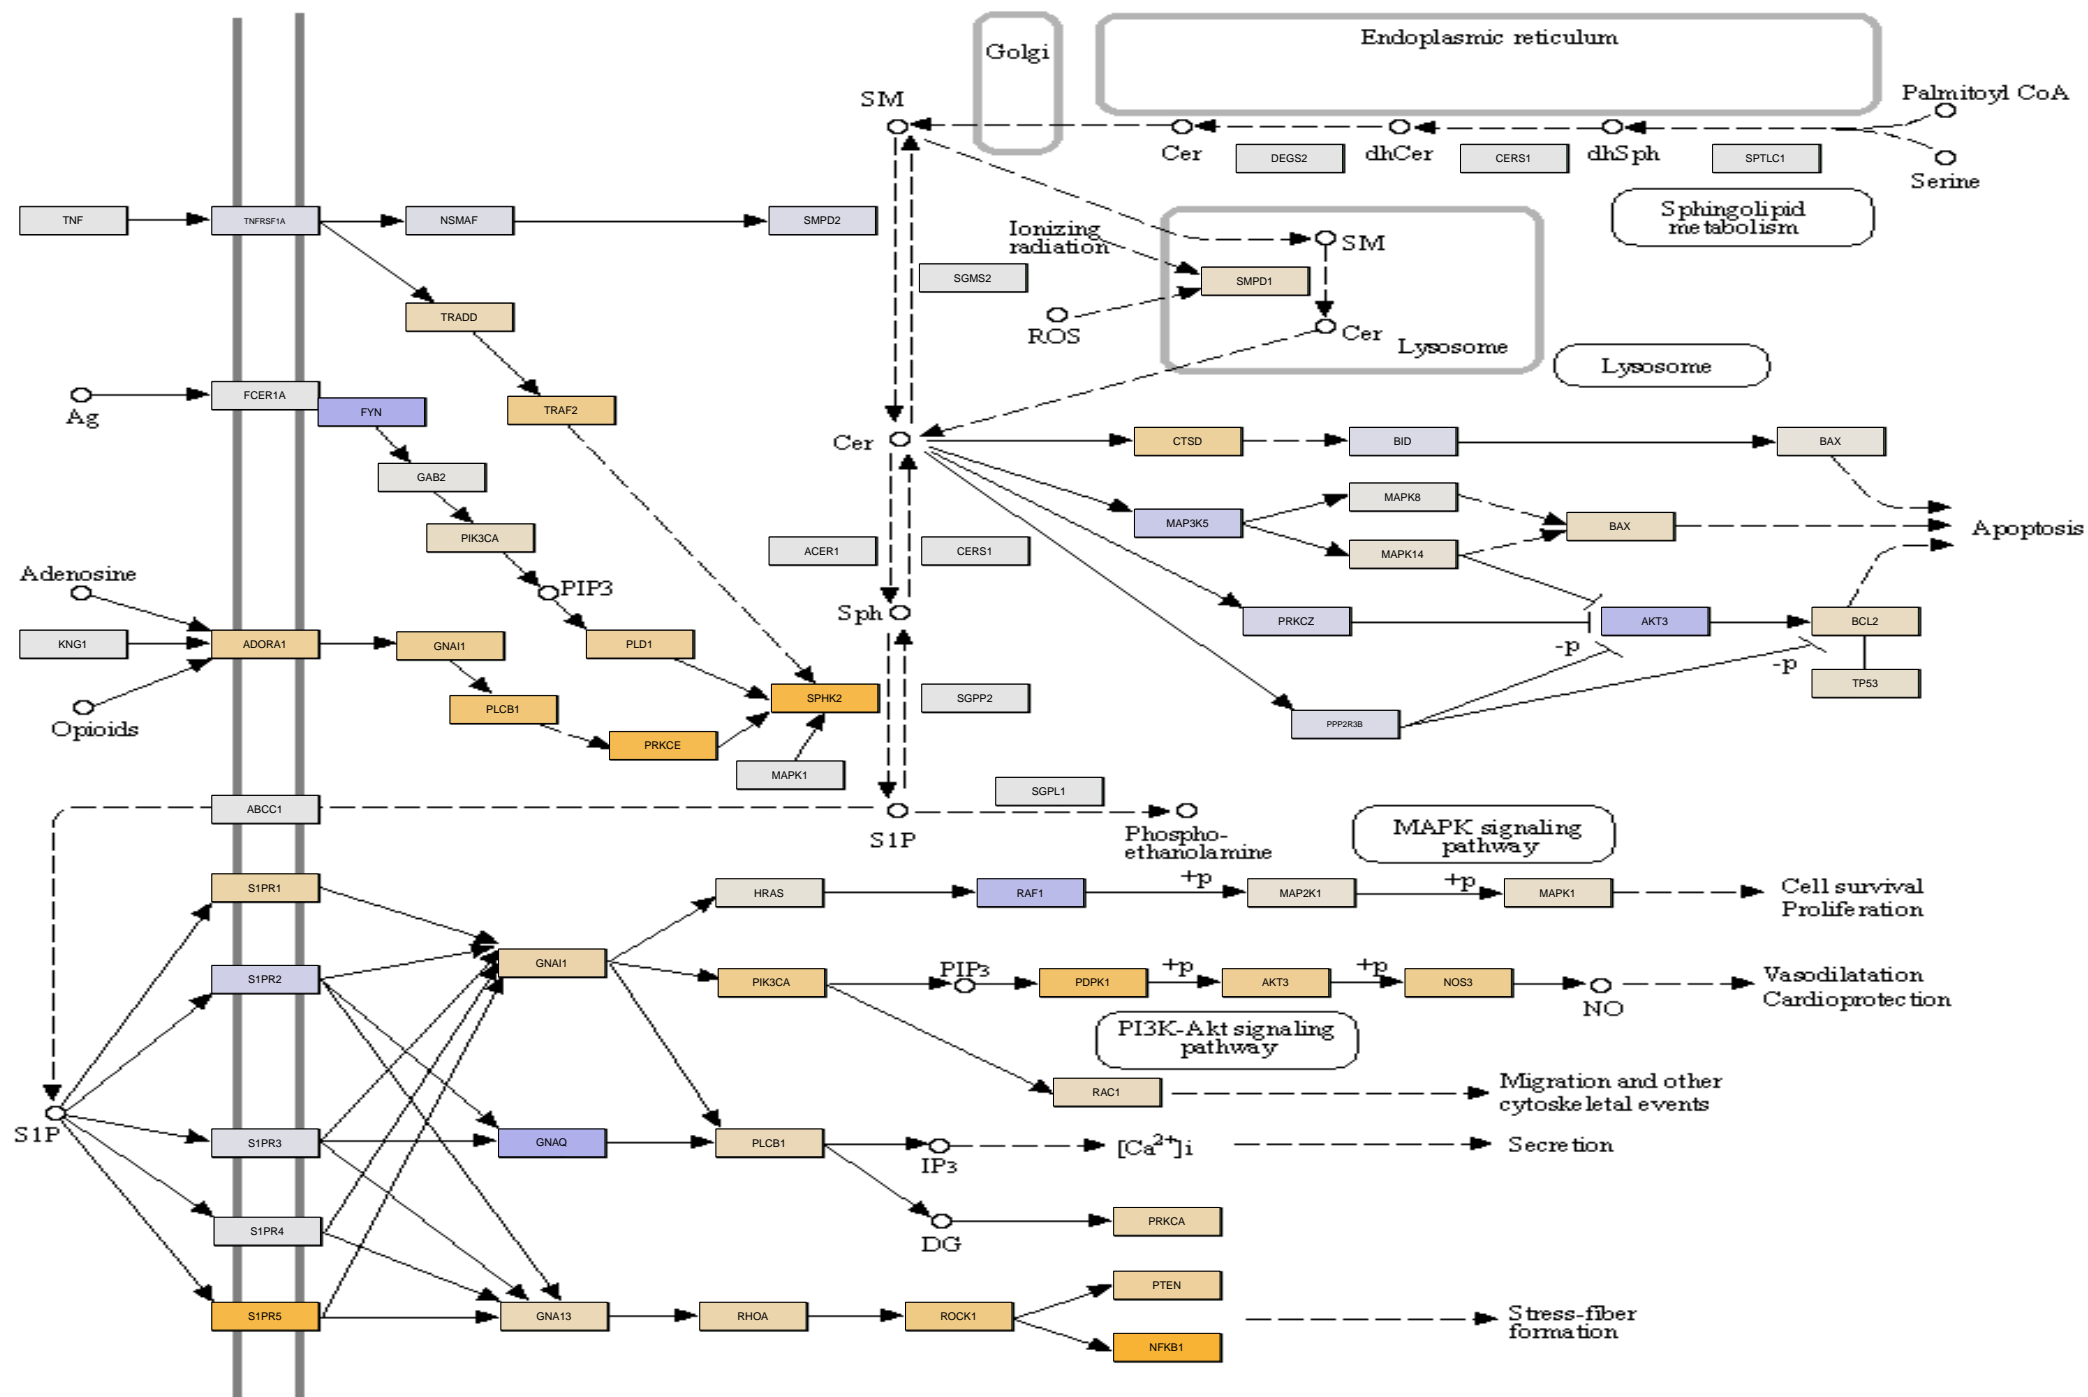



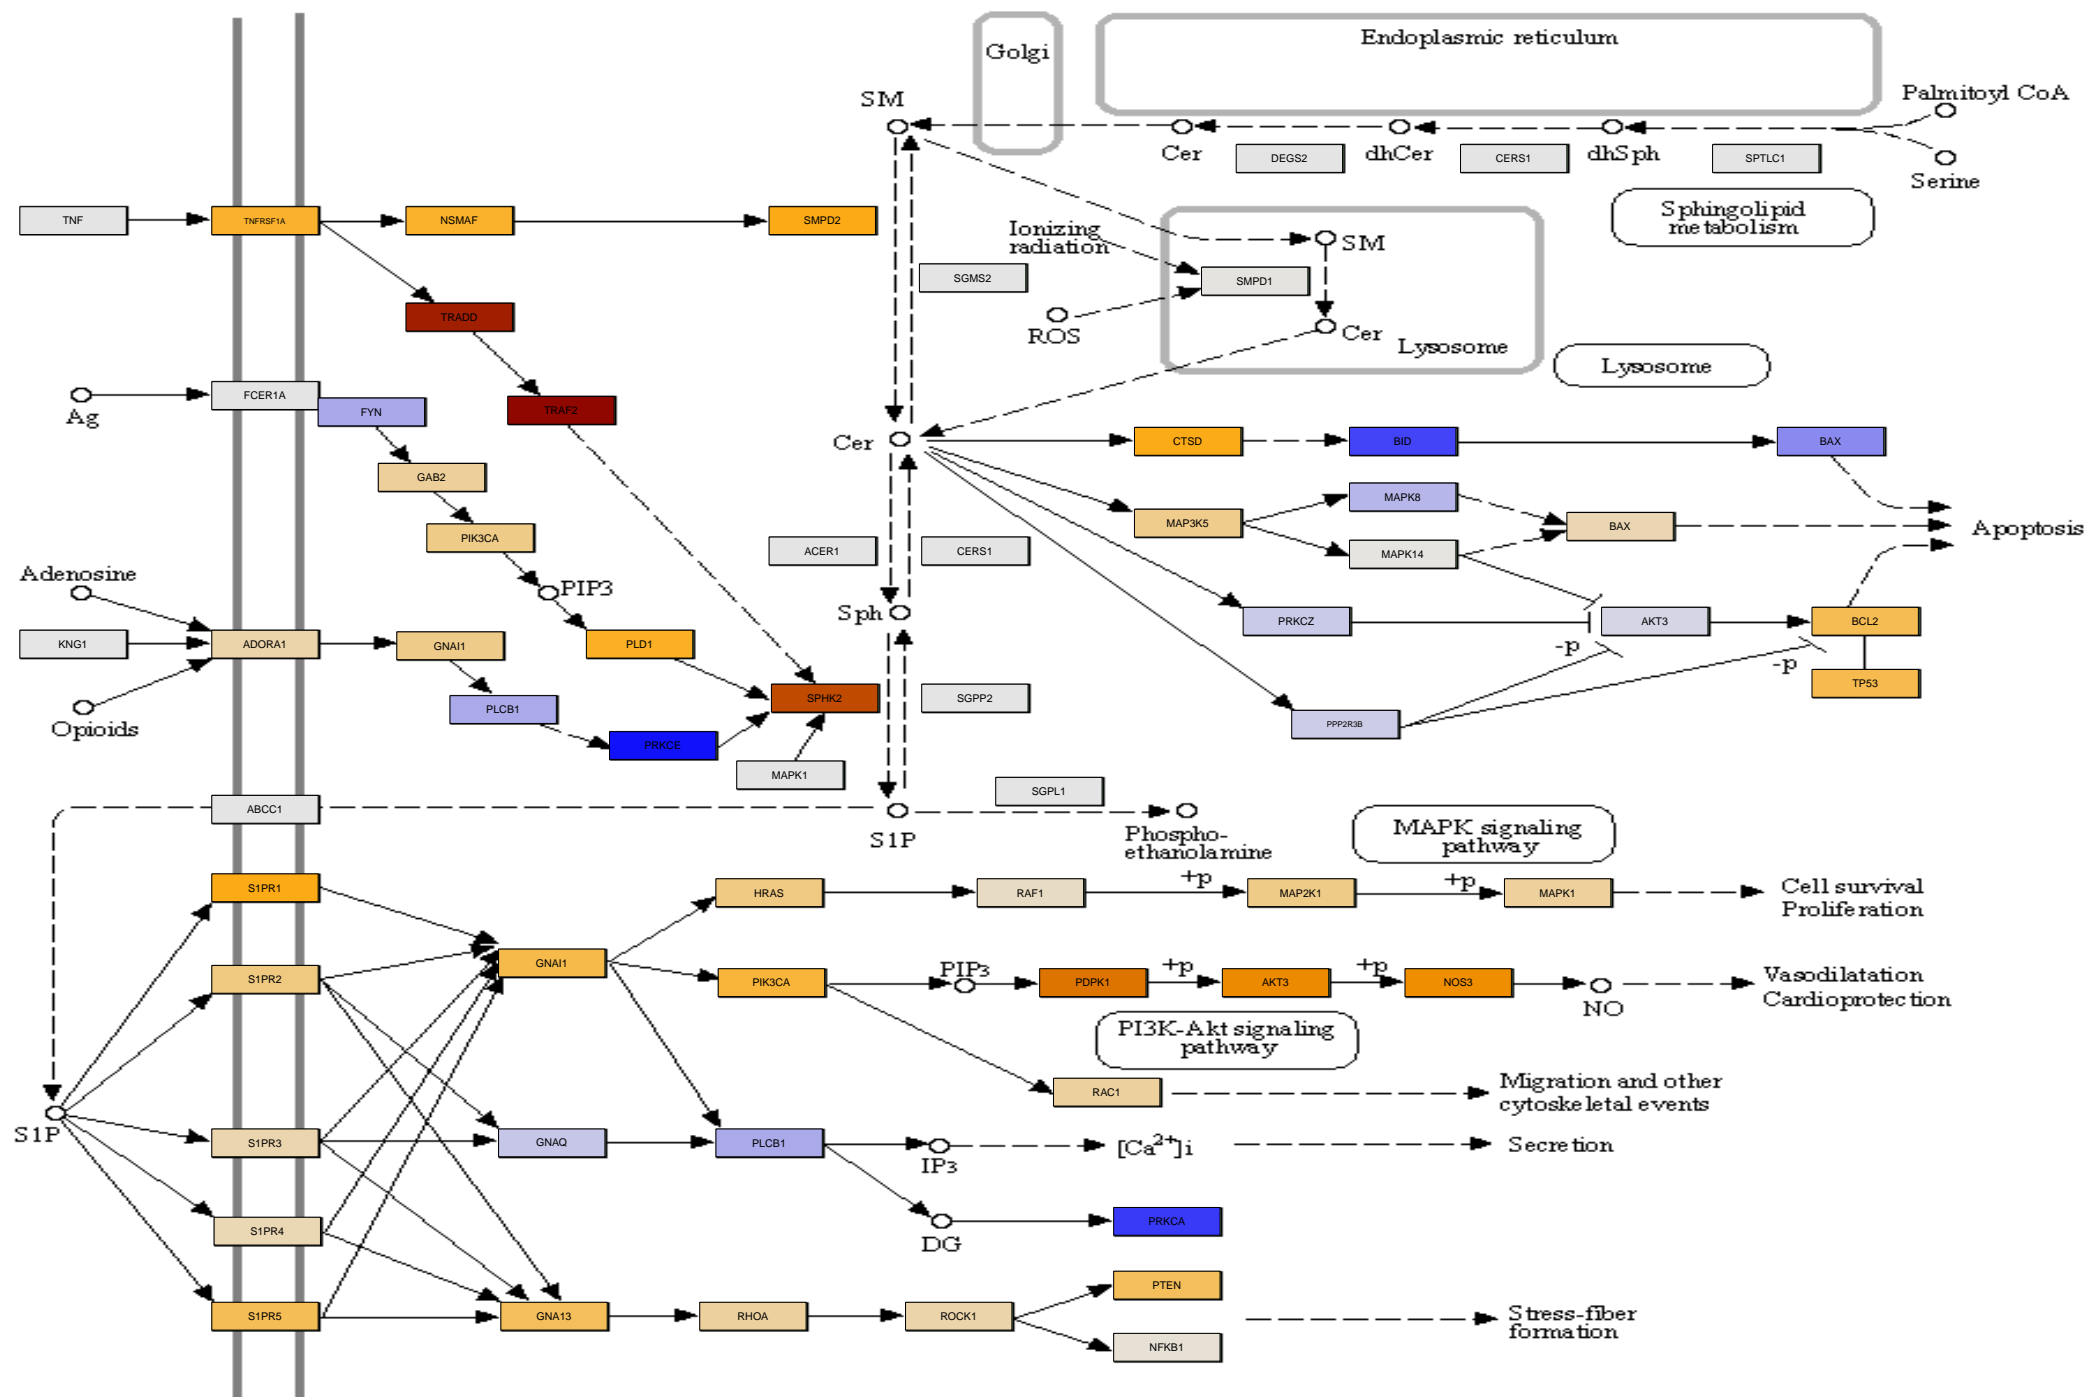

Supplement: s1 [file s1]

Thyroid hormone signaling pathway

all genes

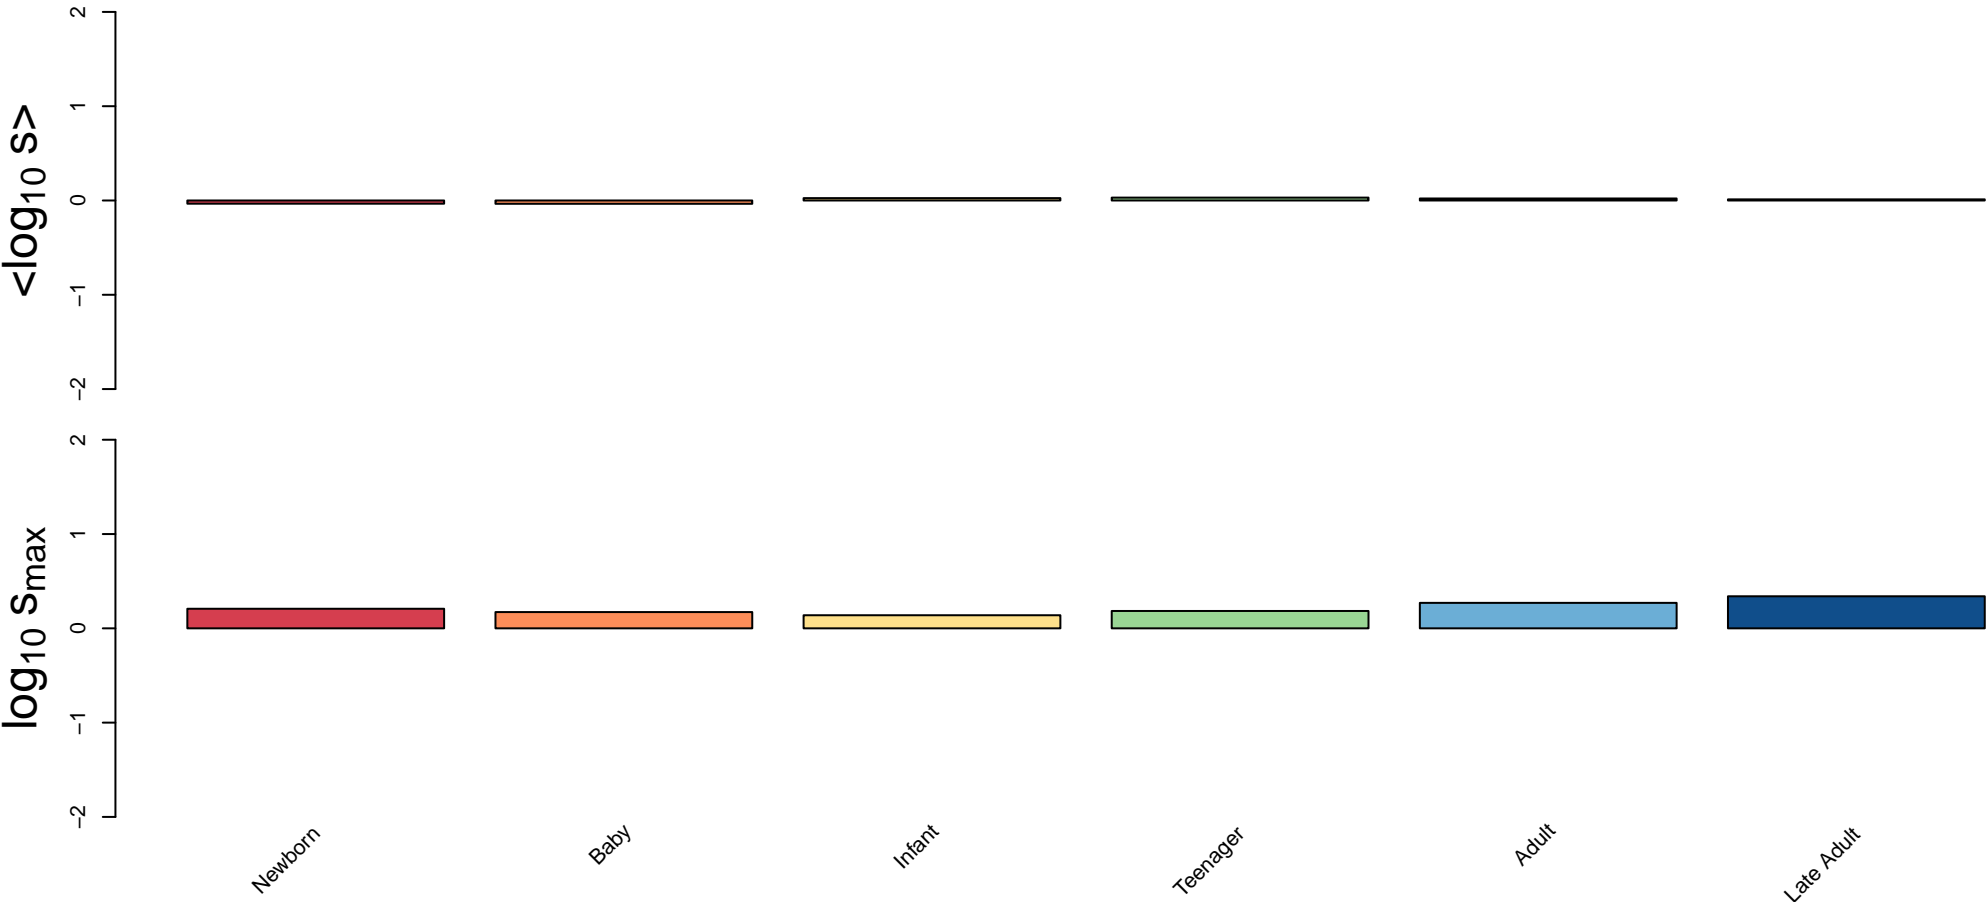

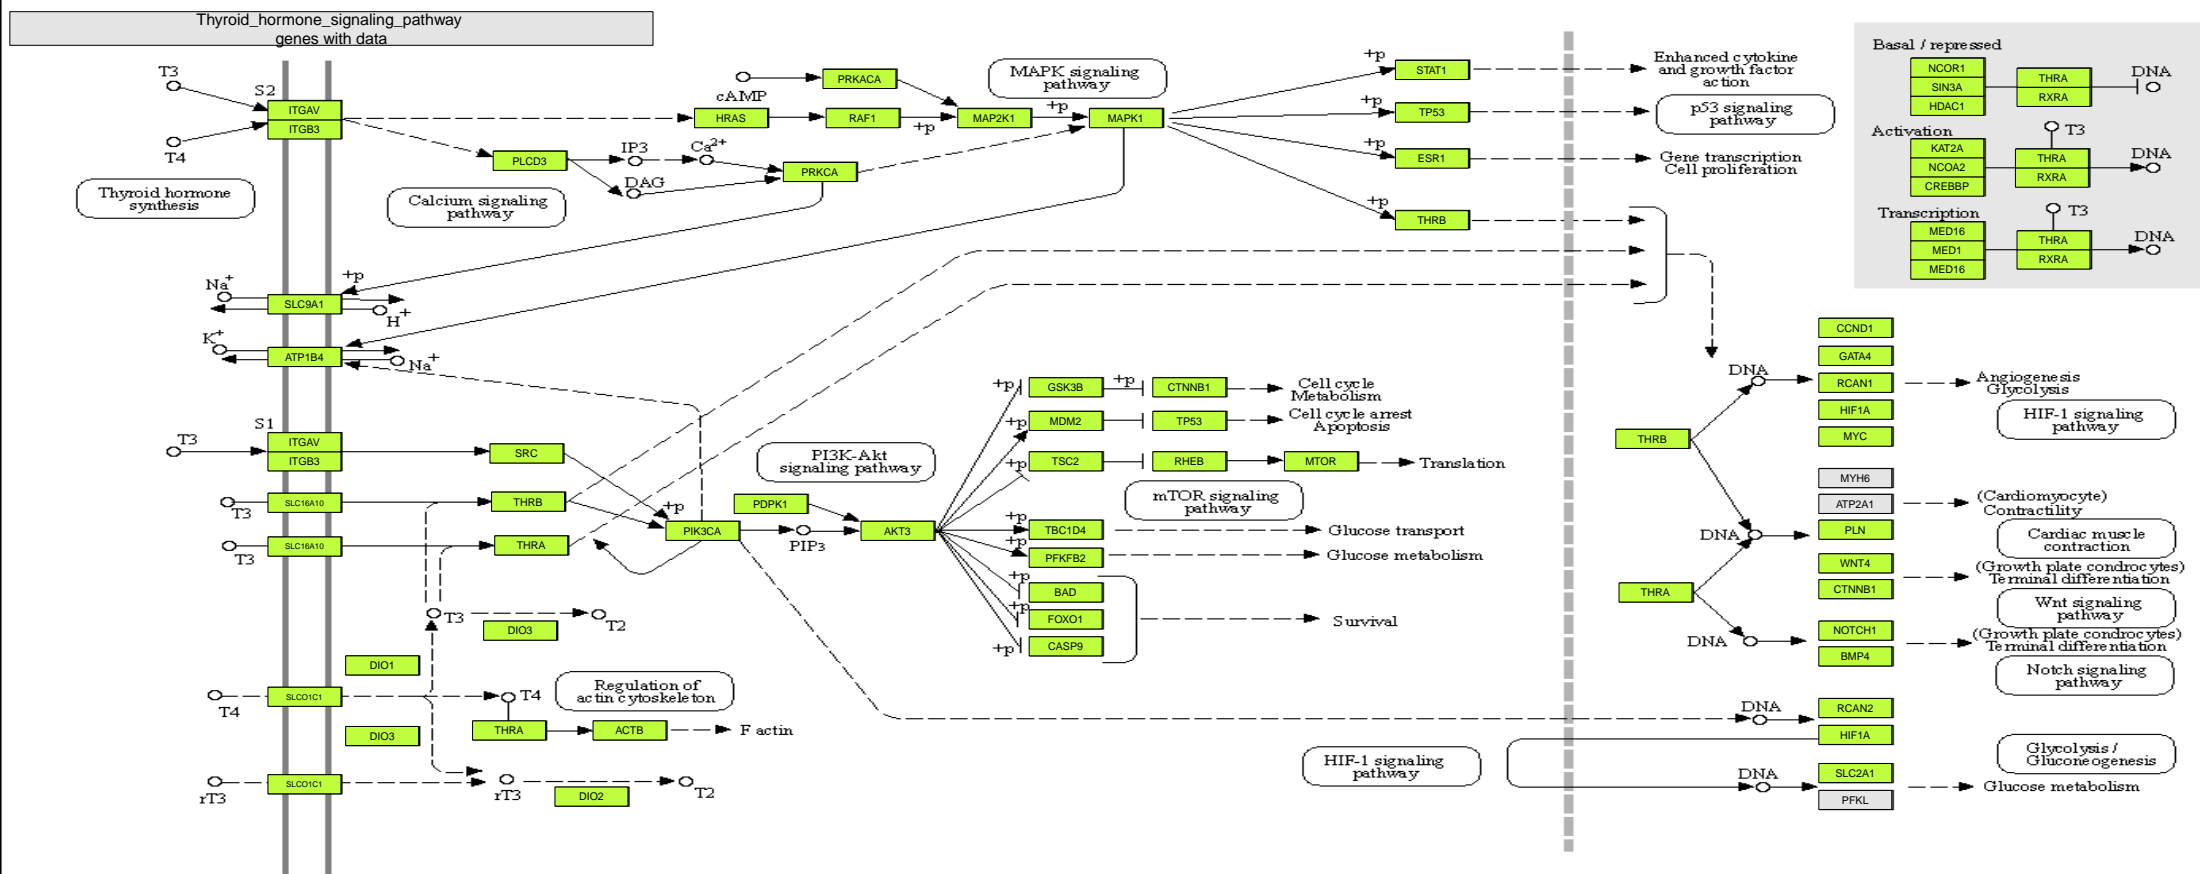



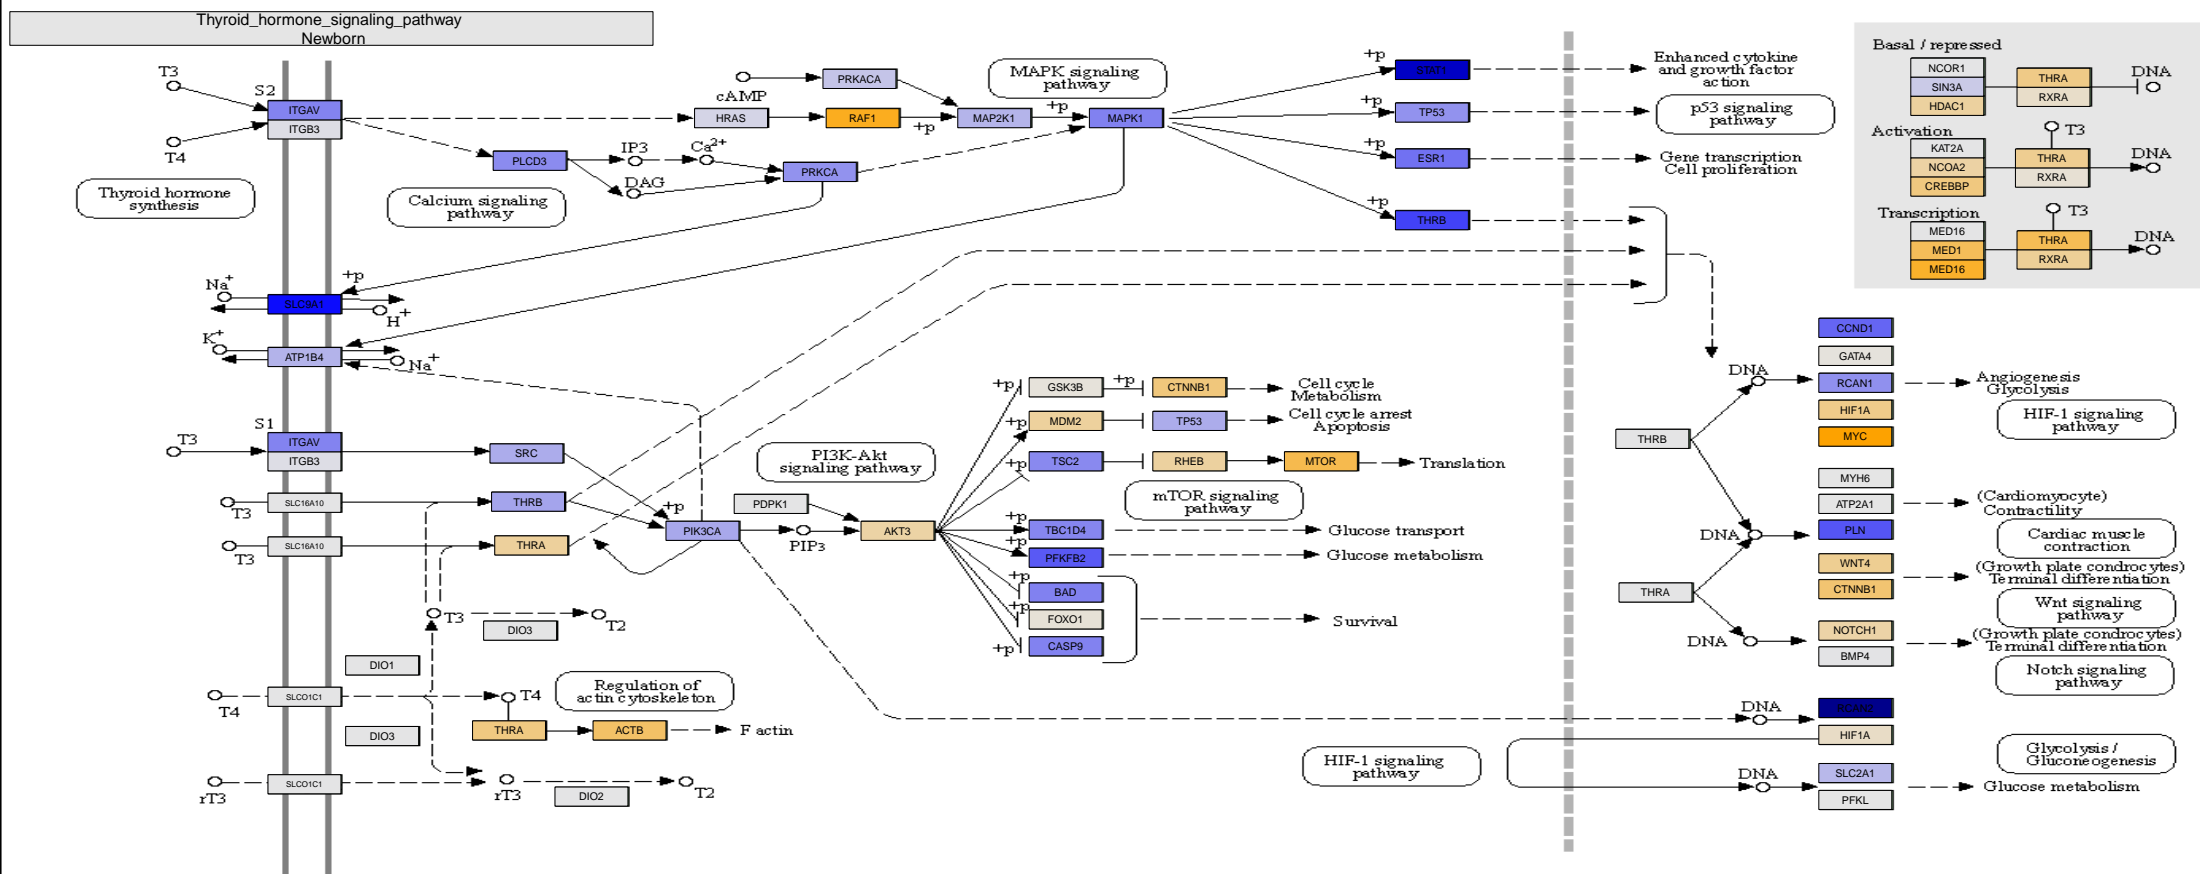

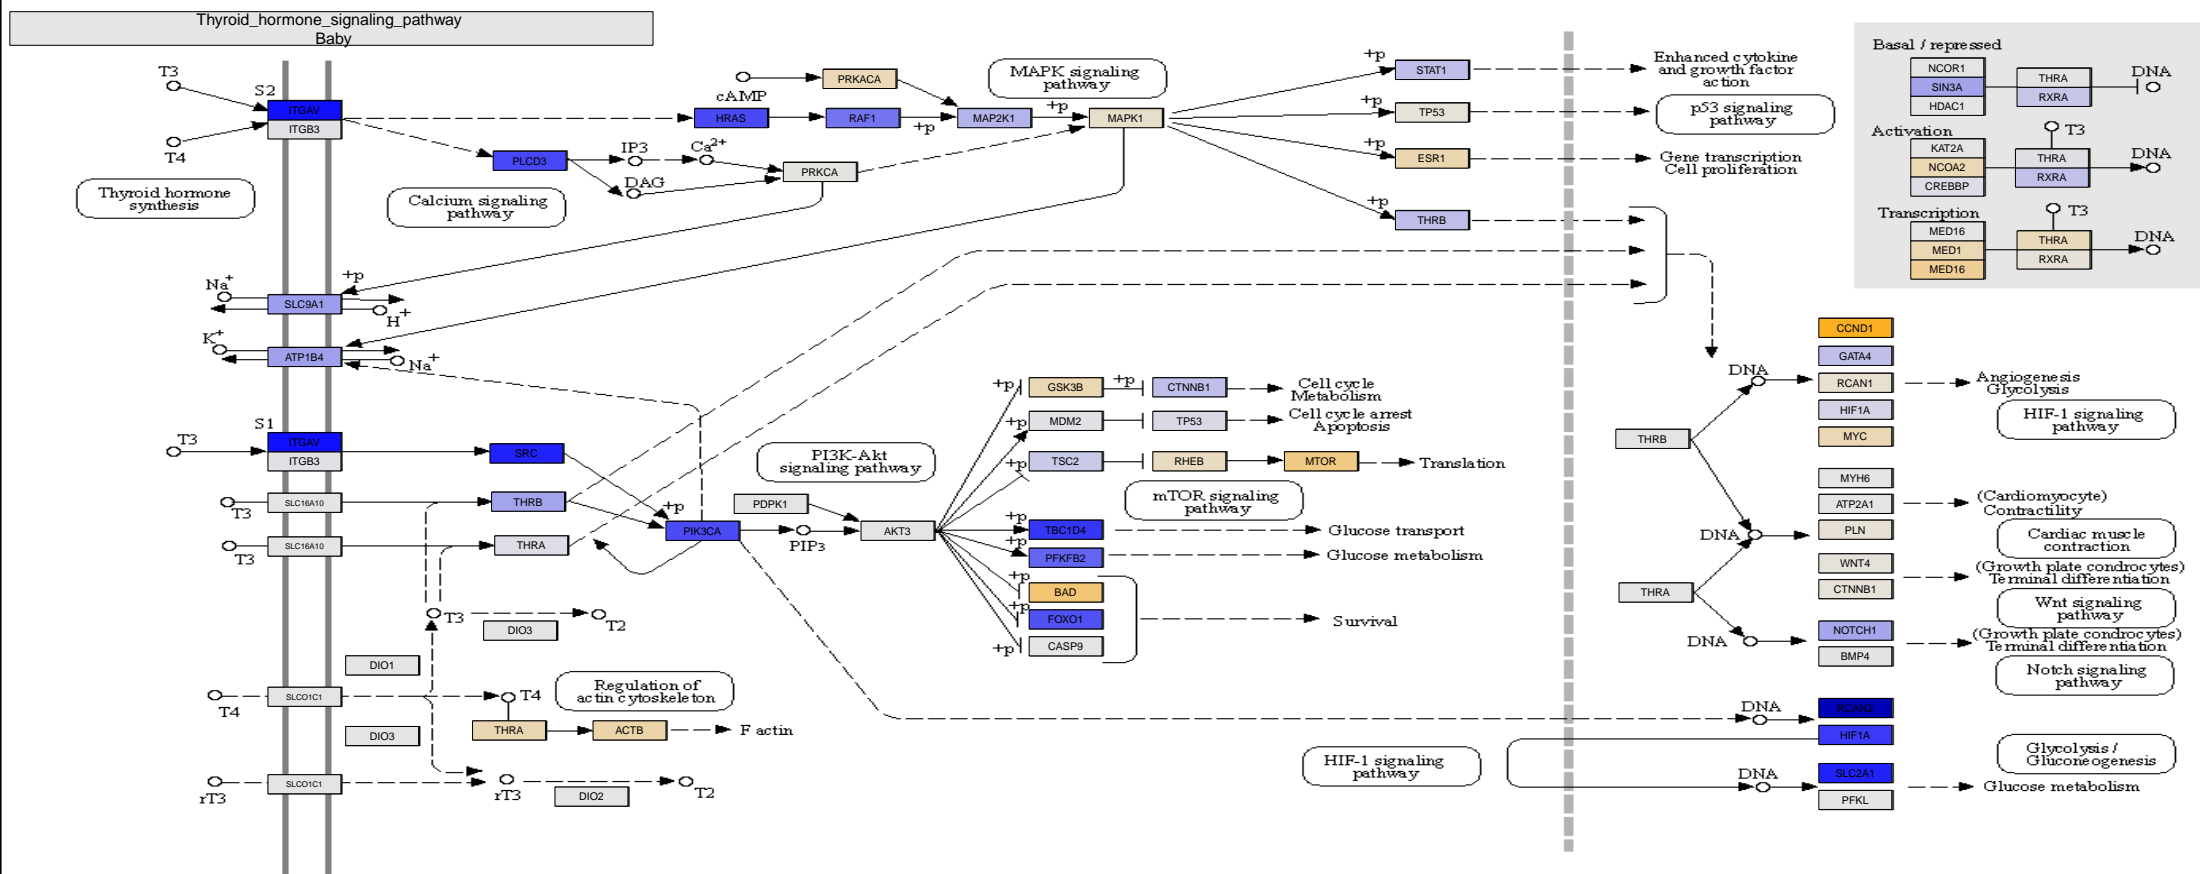

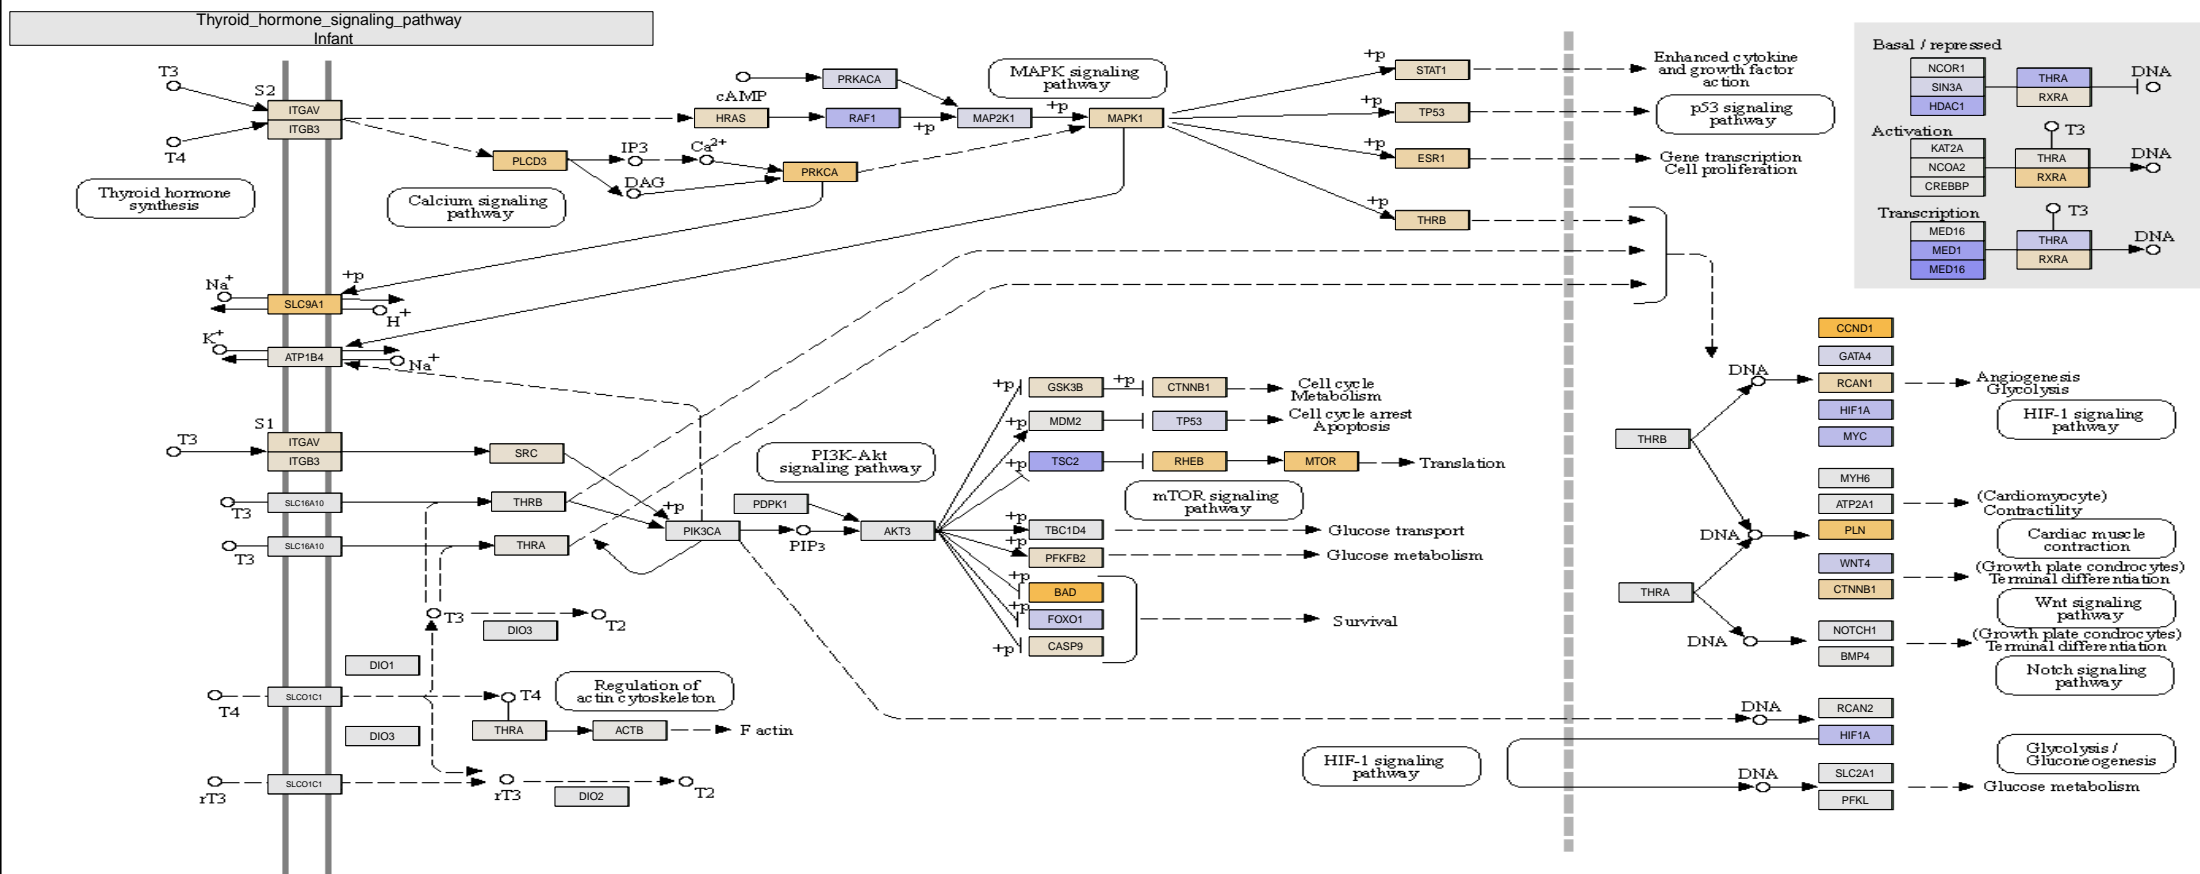

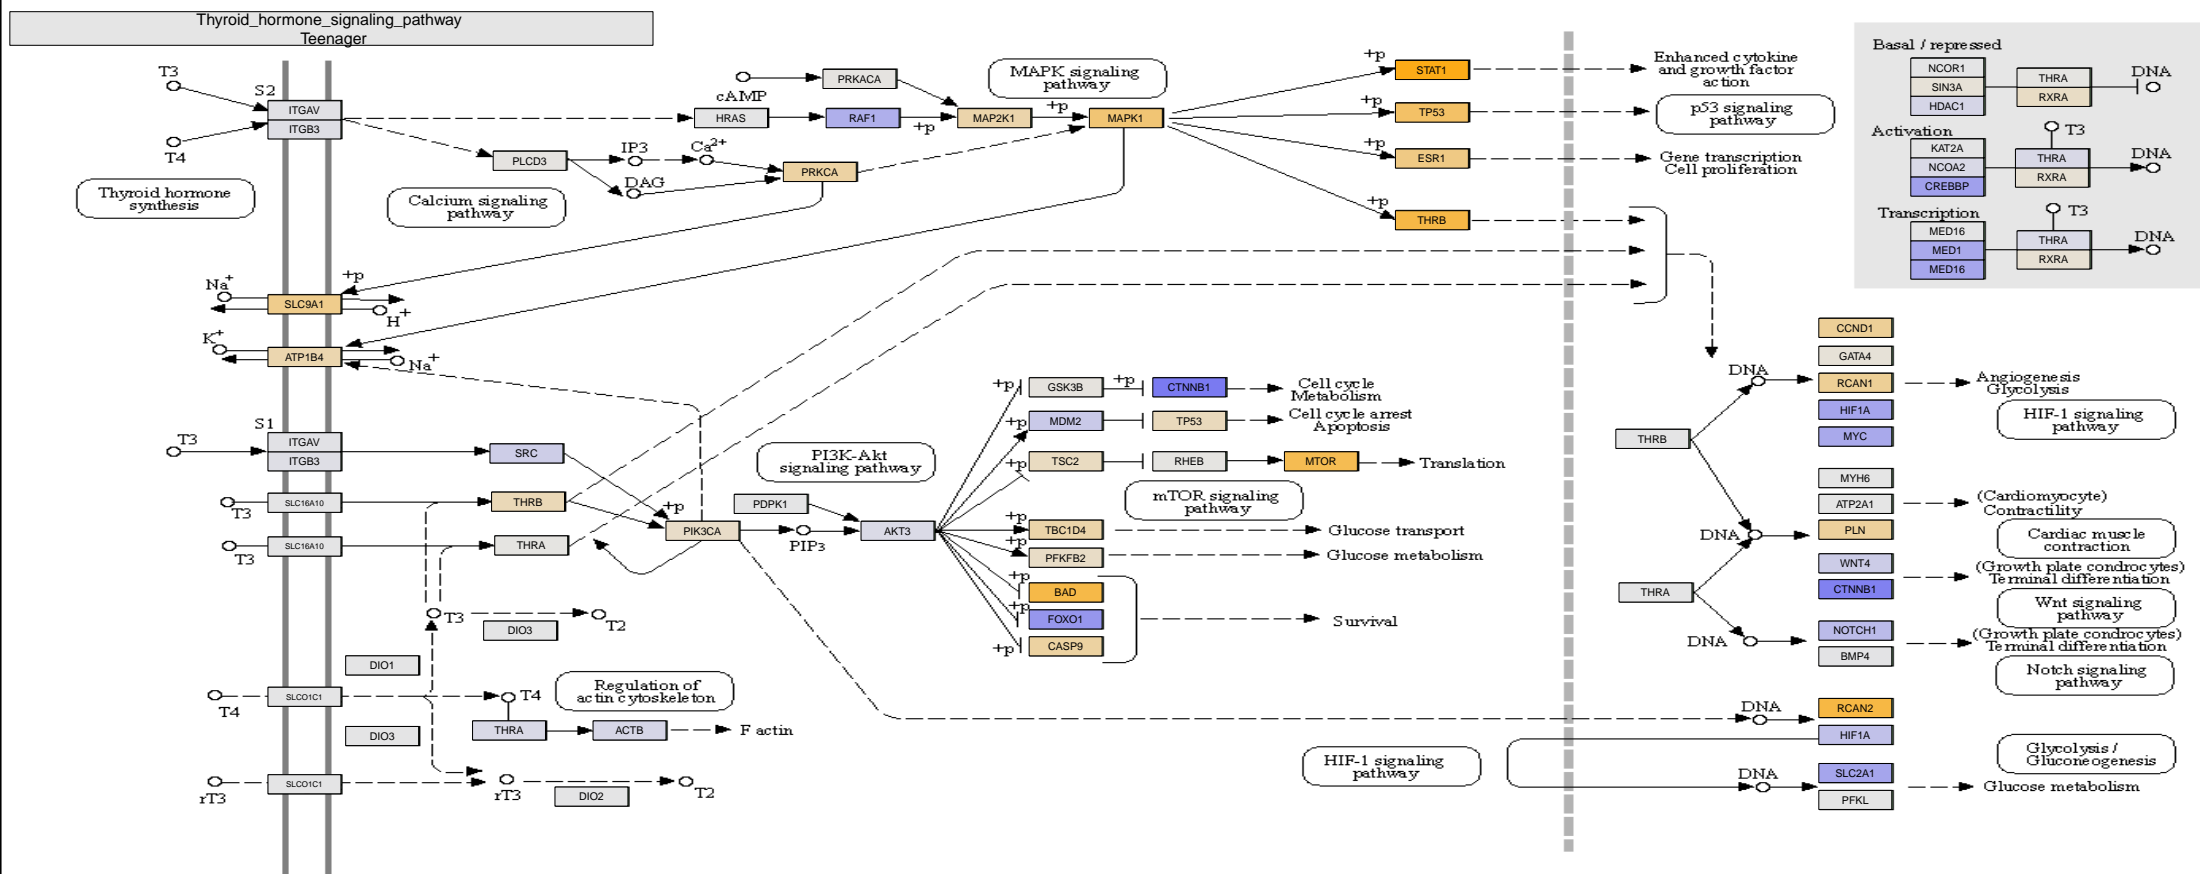

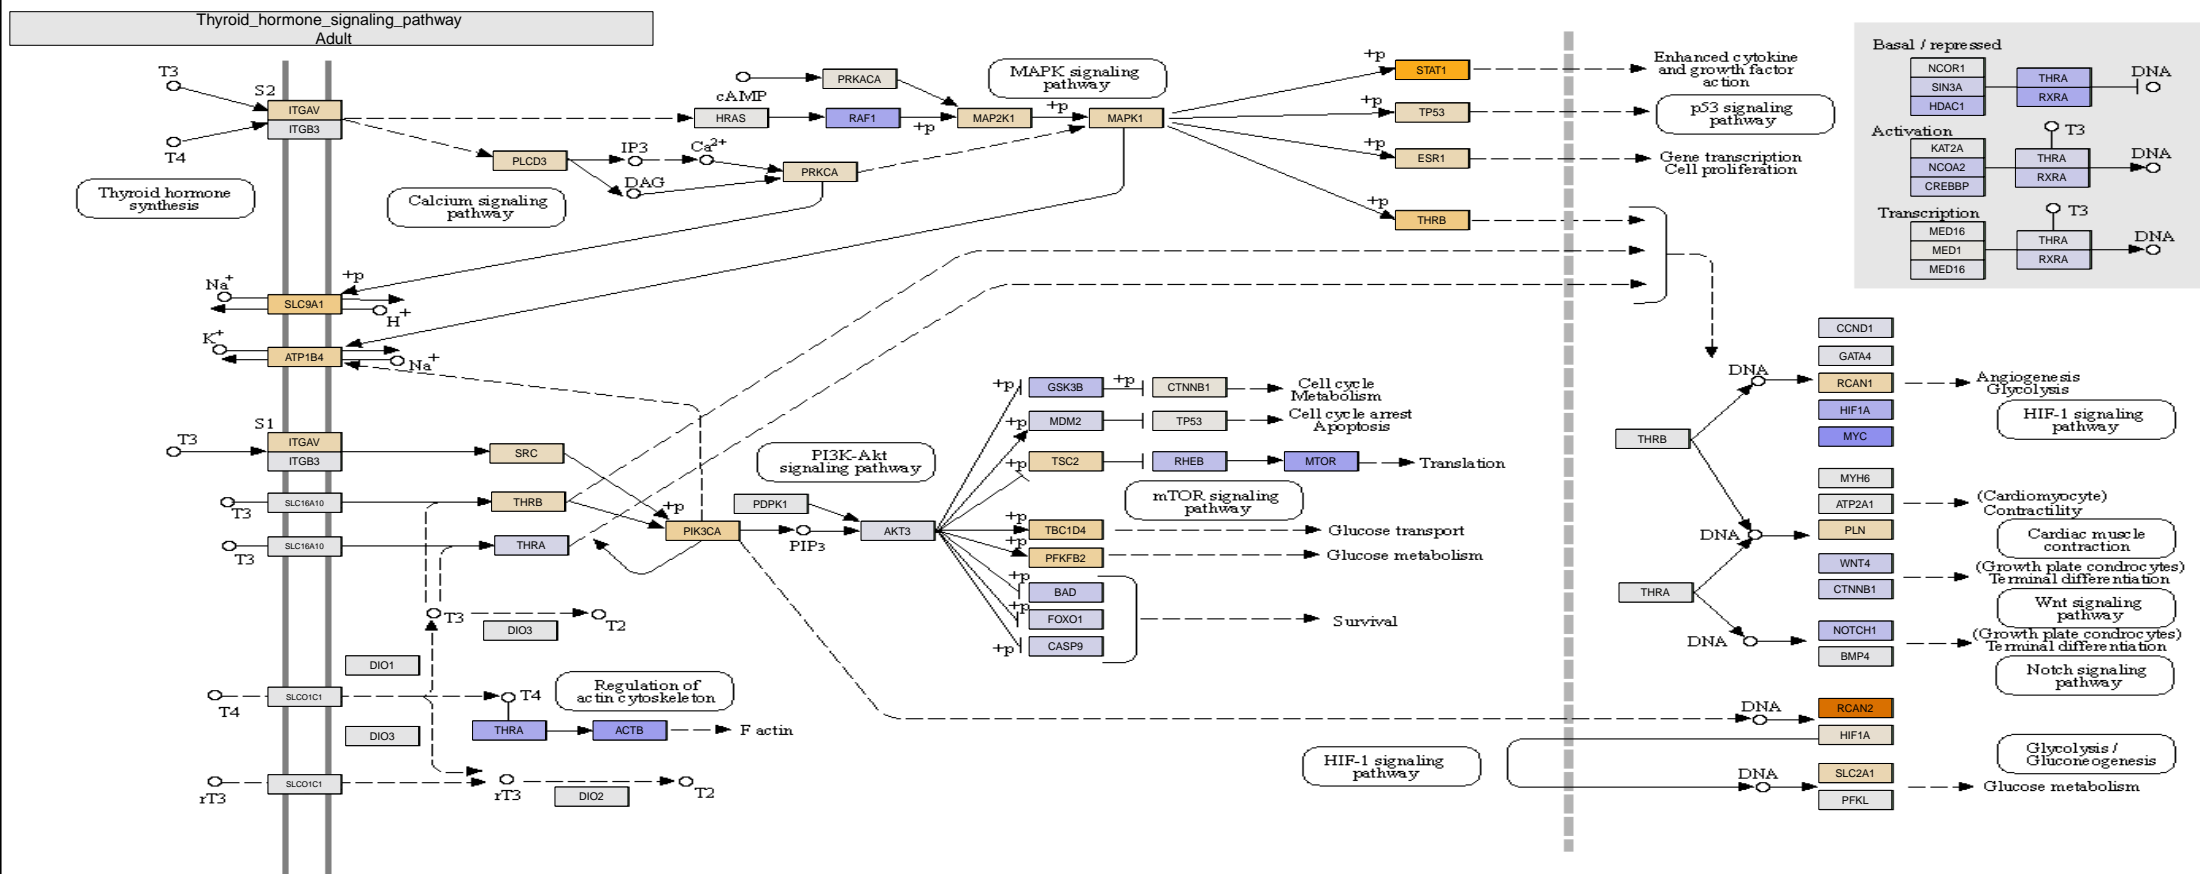



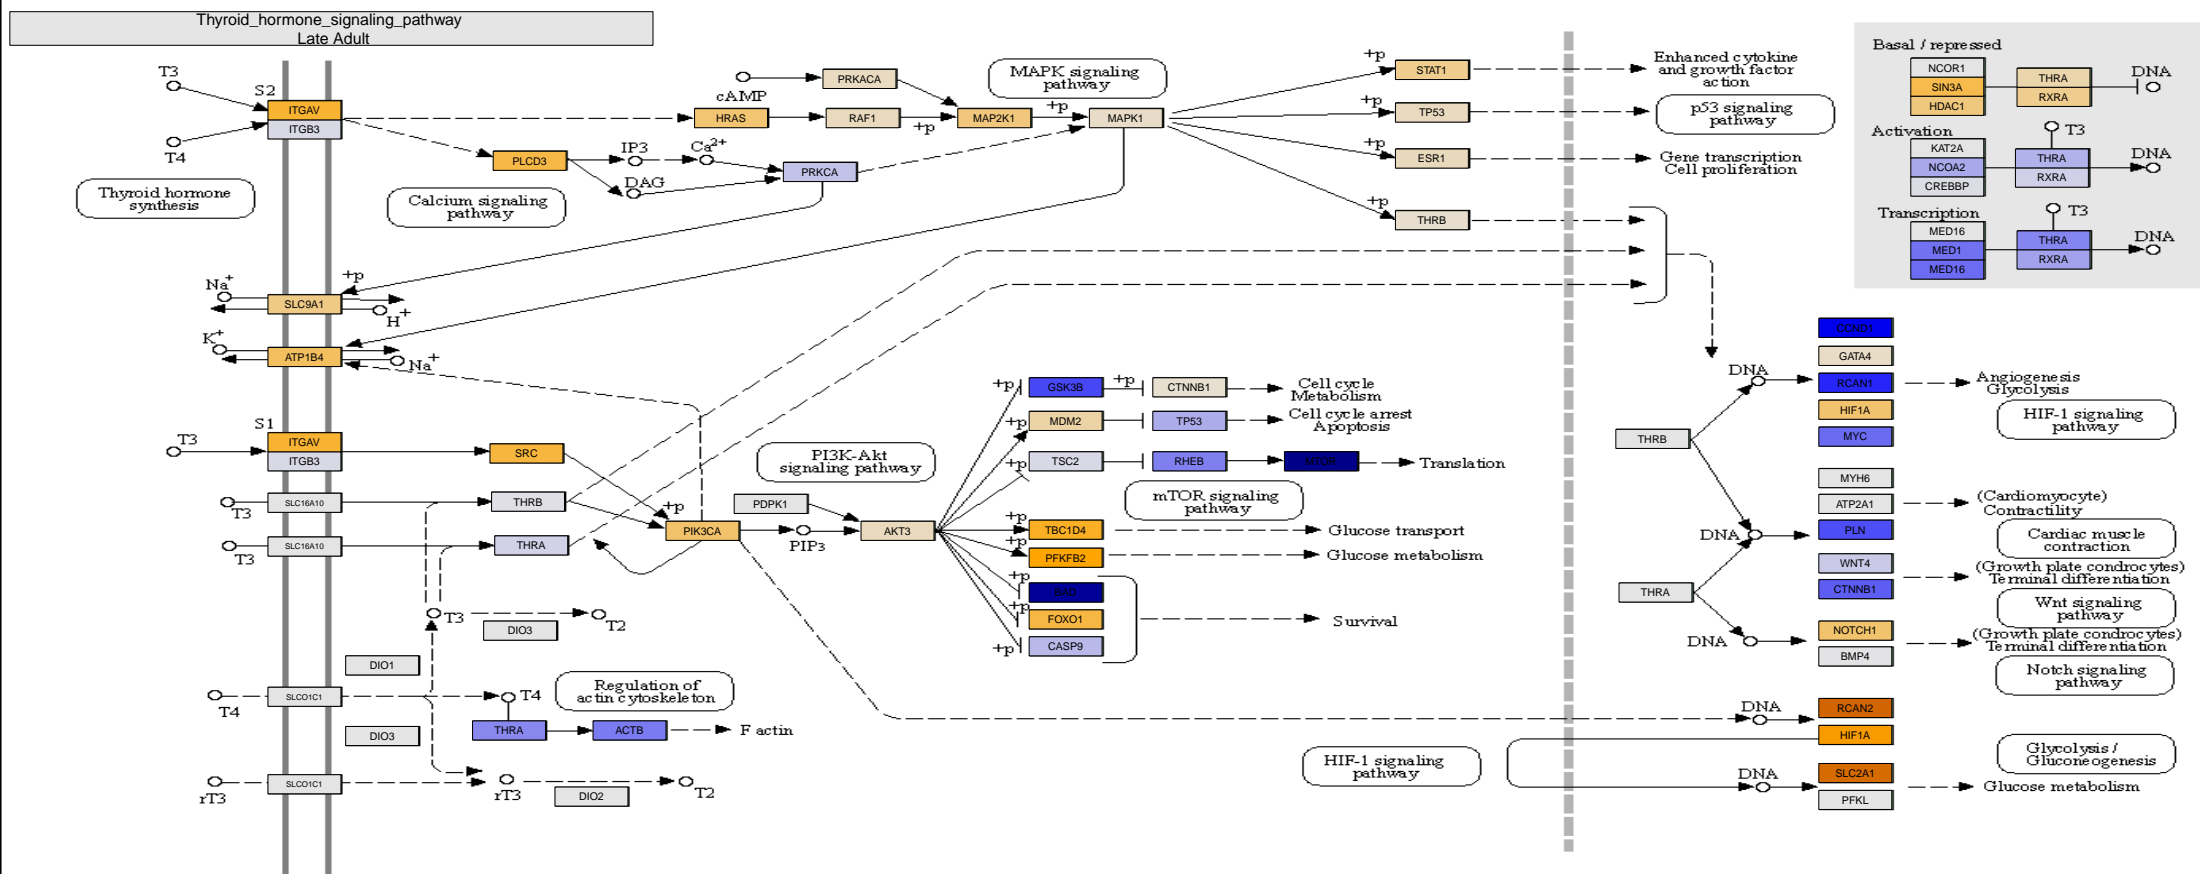

Supplement: s1 [file s1]

Sphingolipid signaling pathway

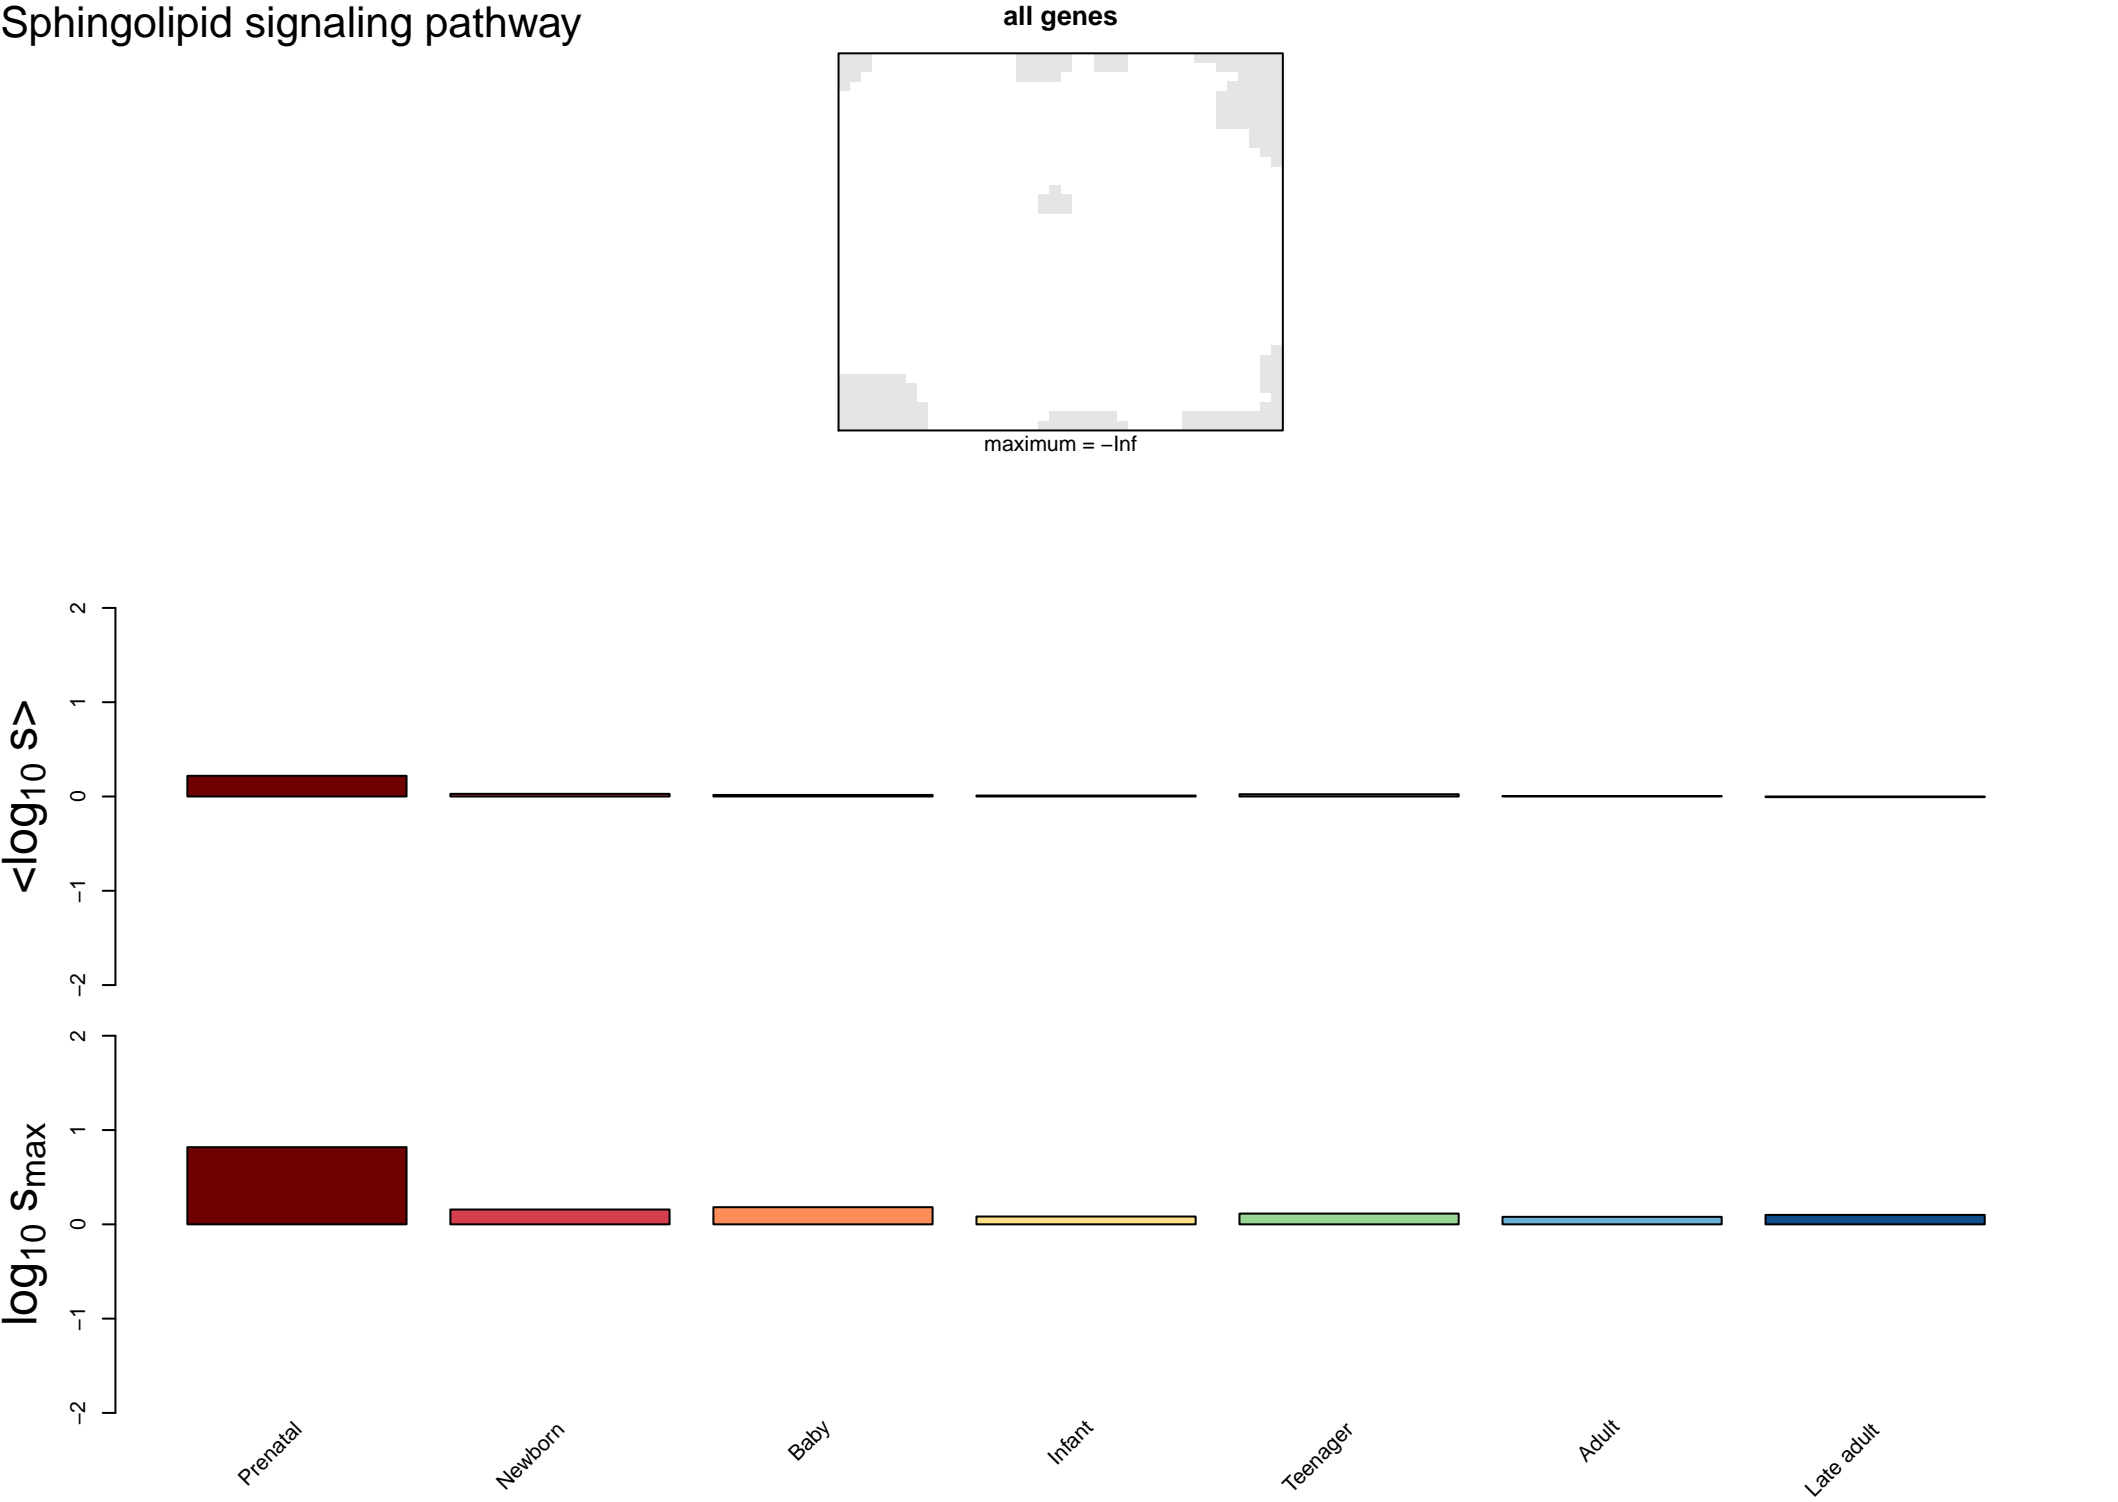

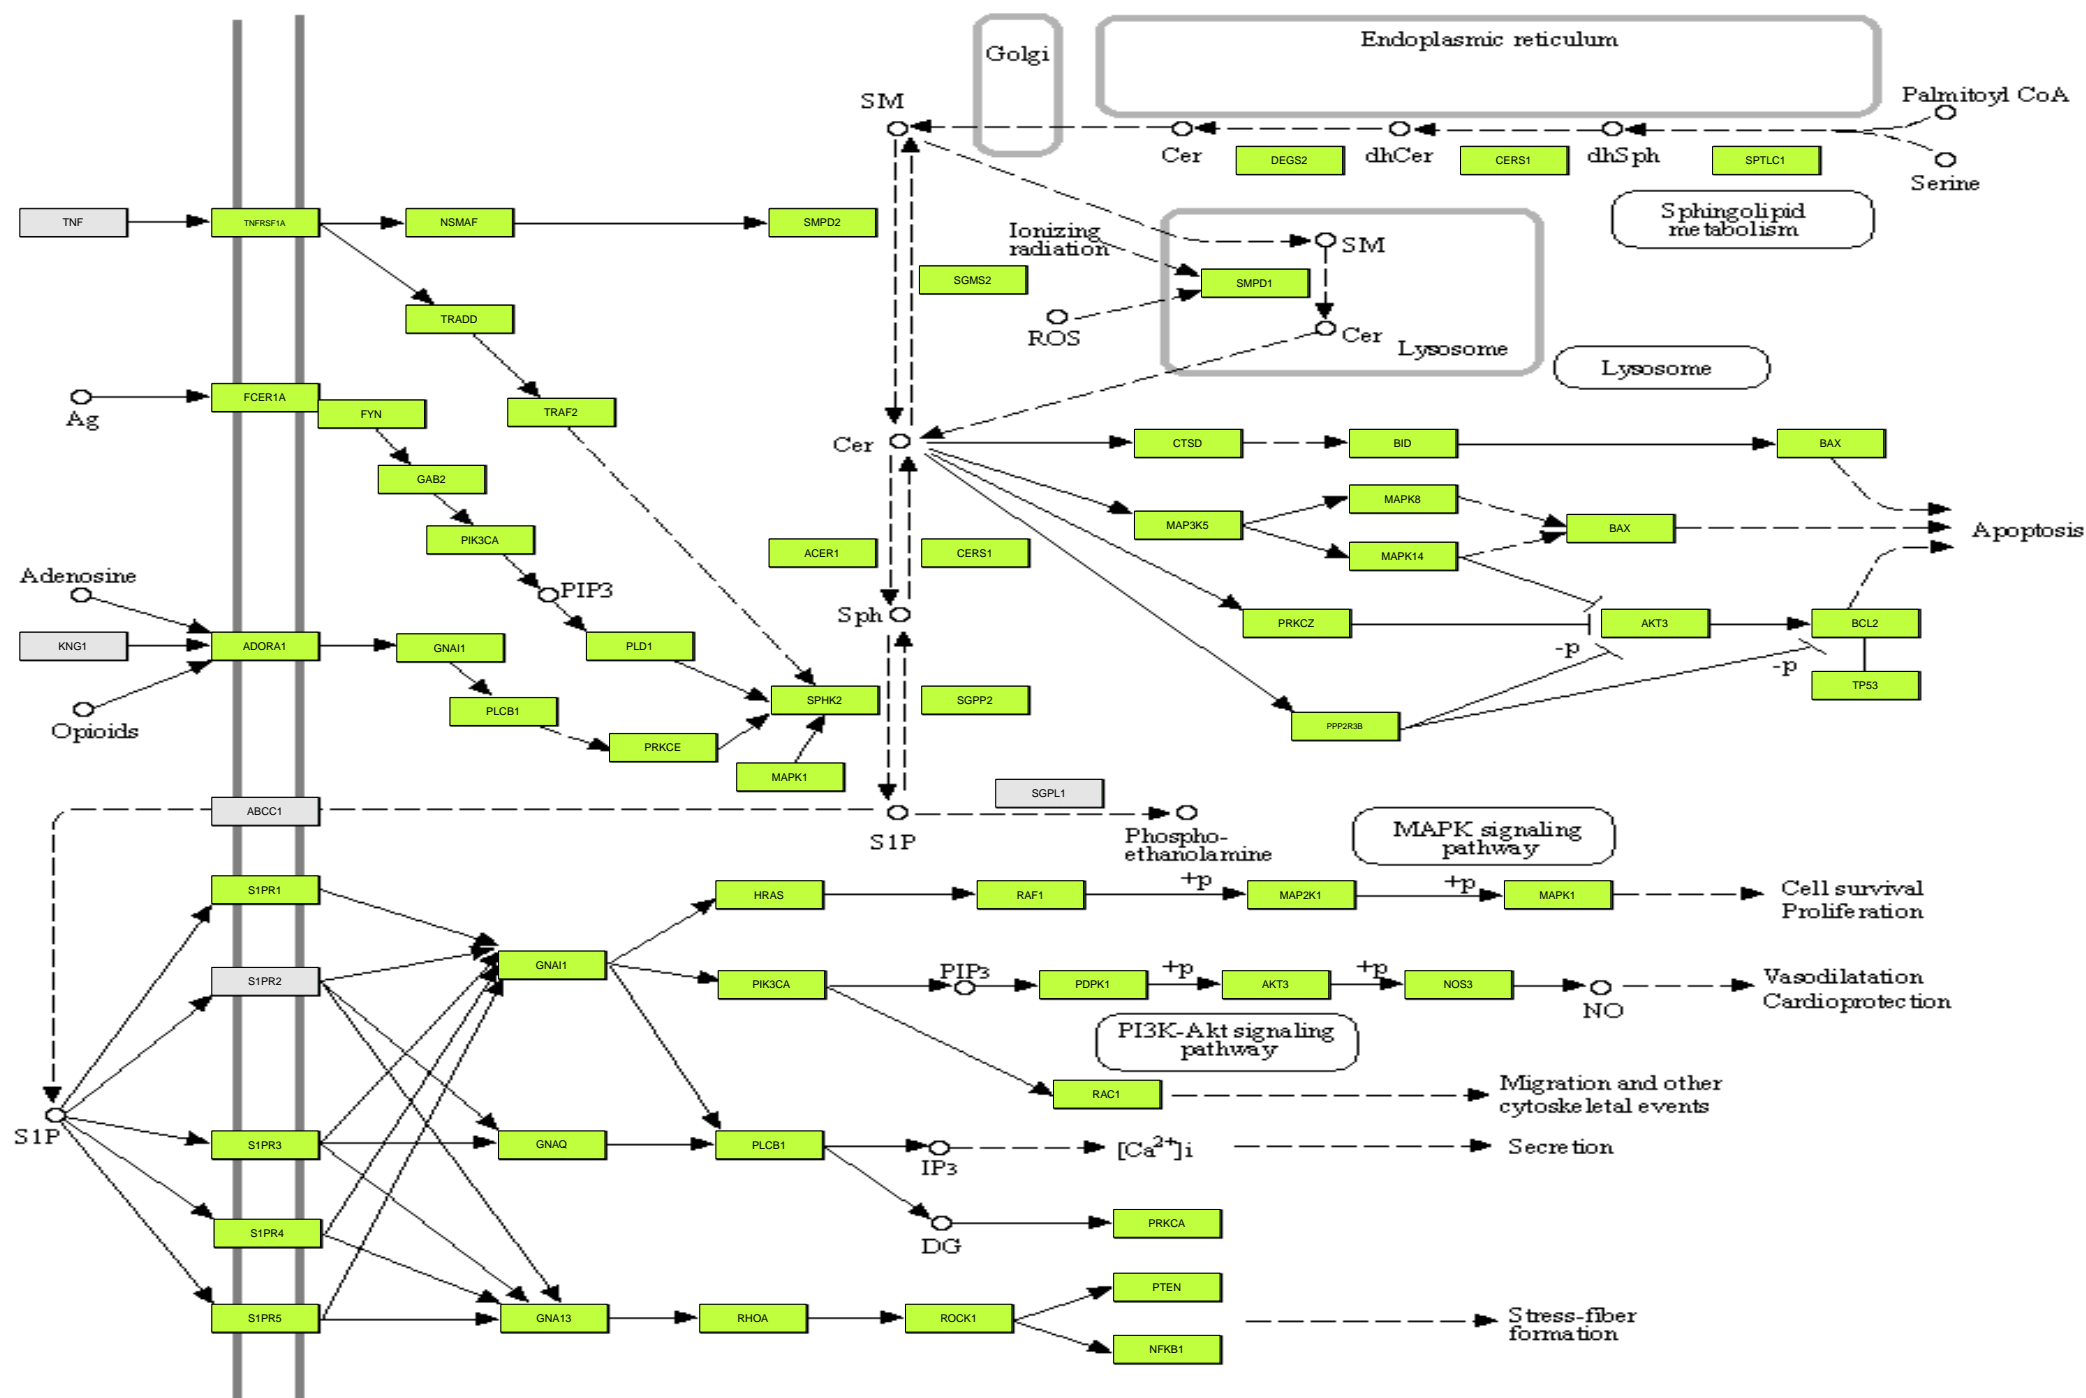



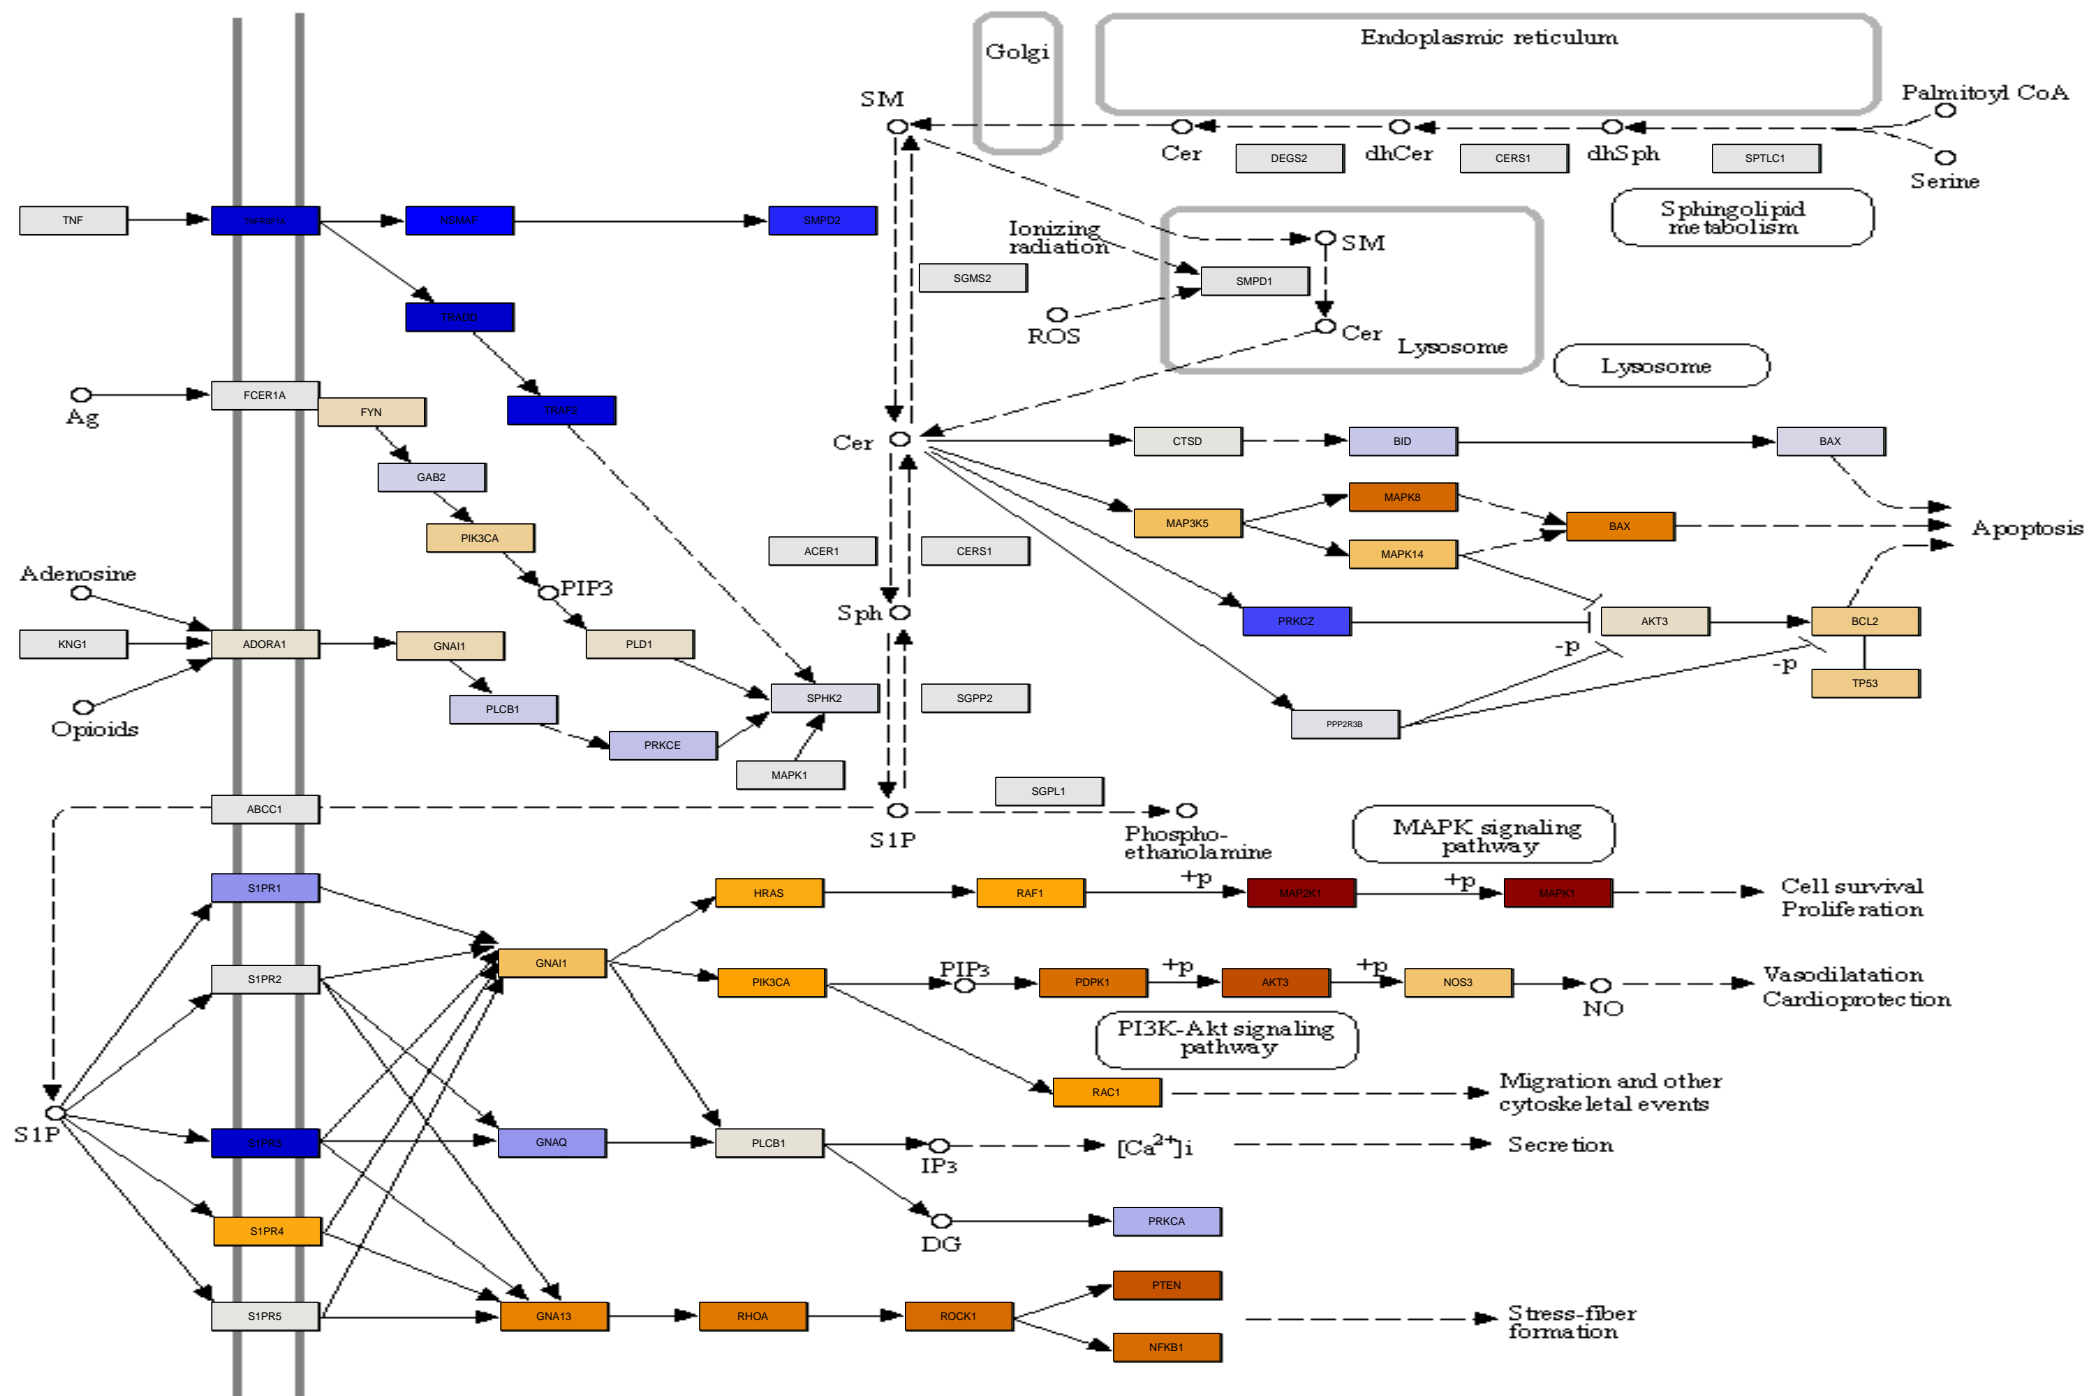

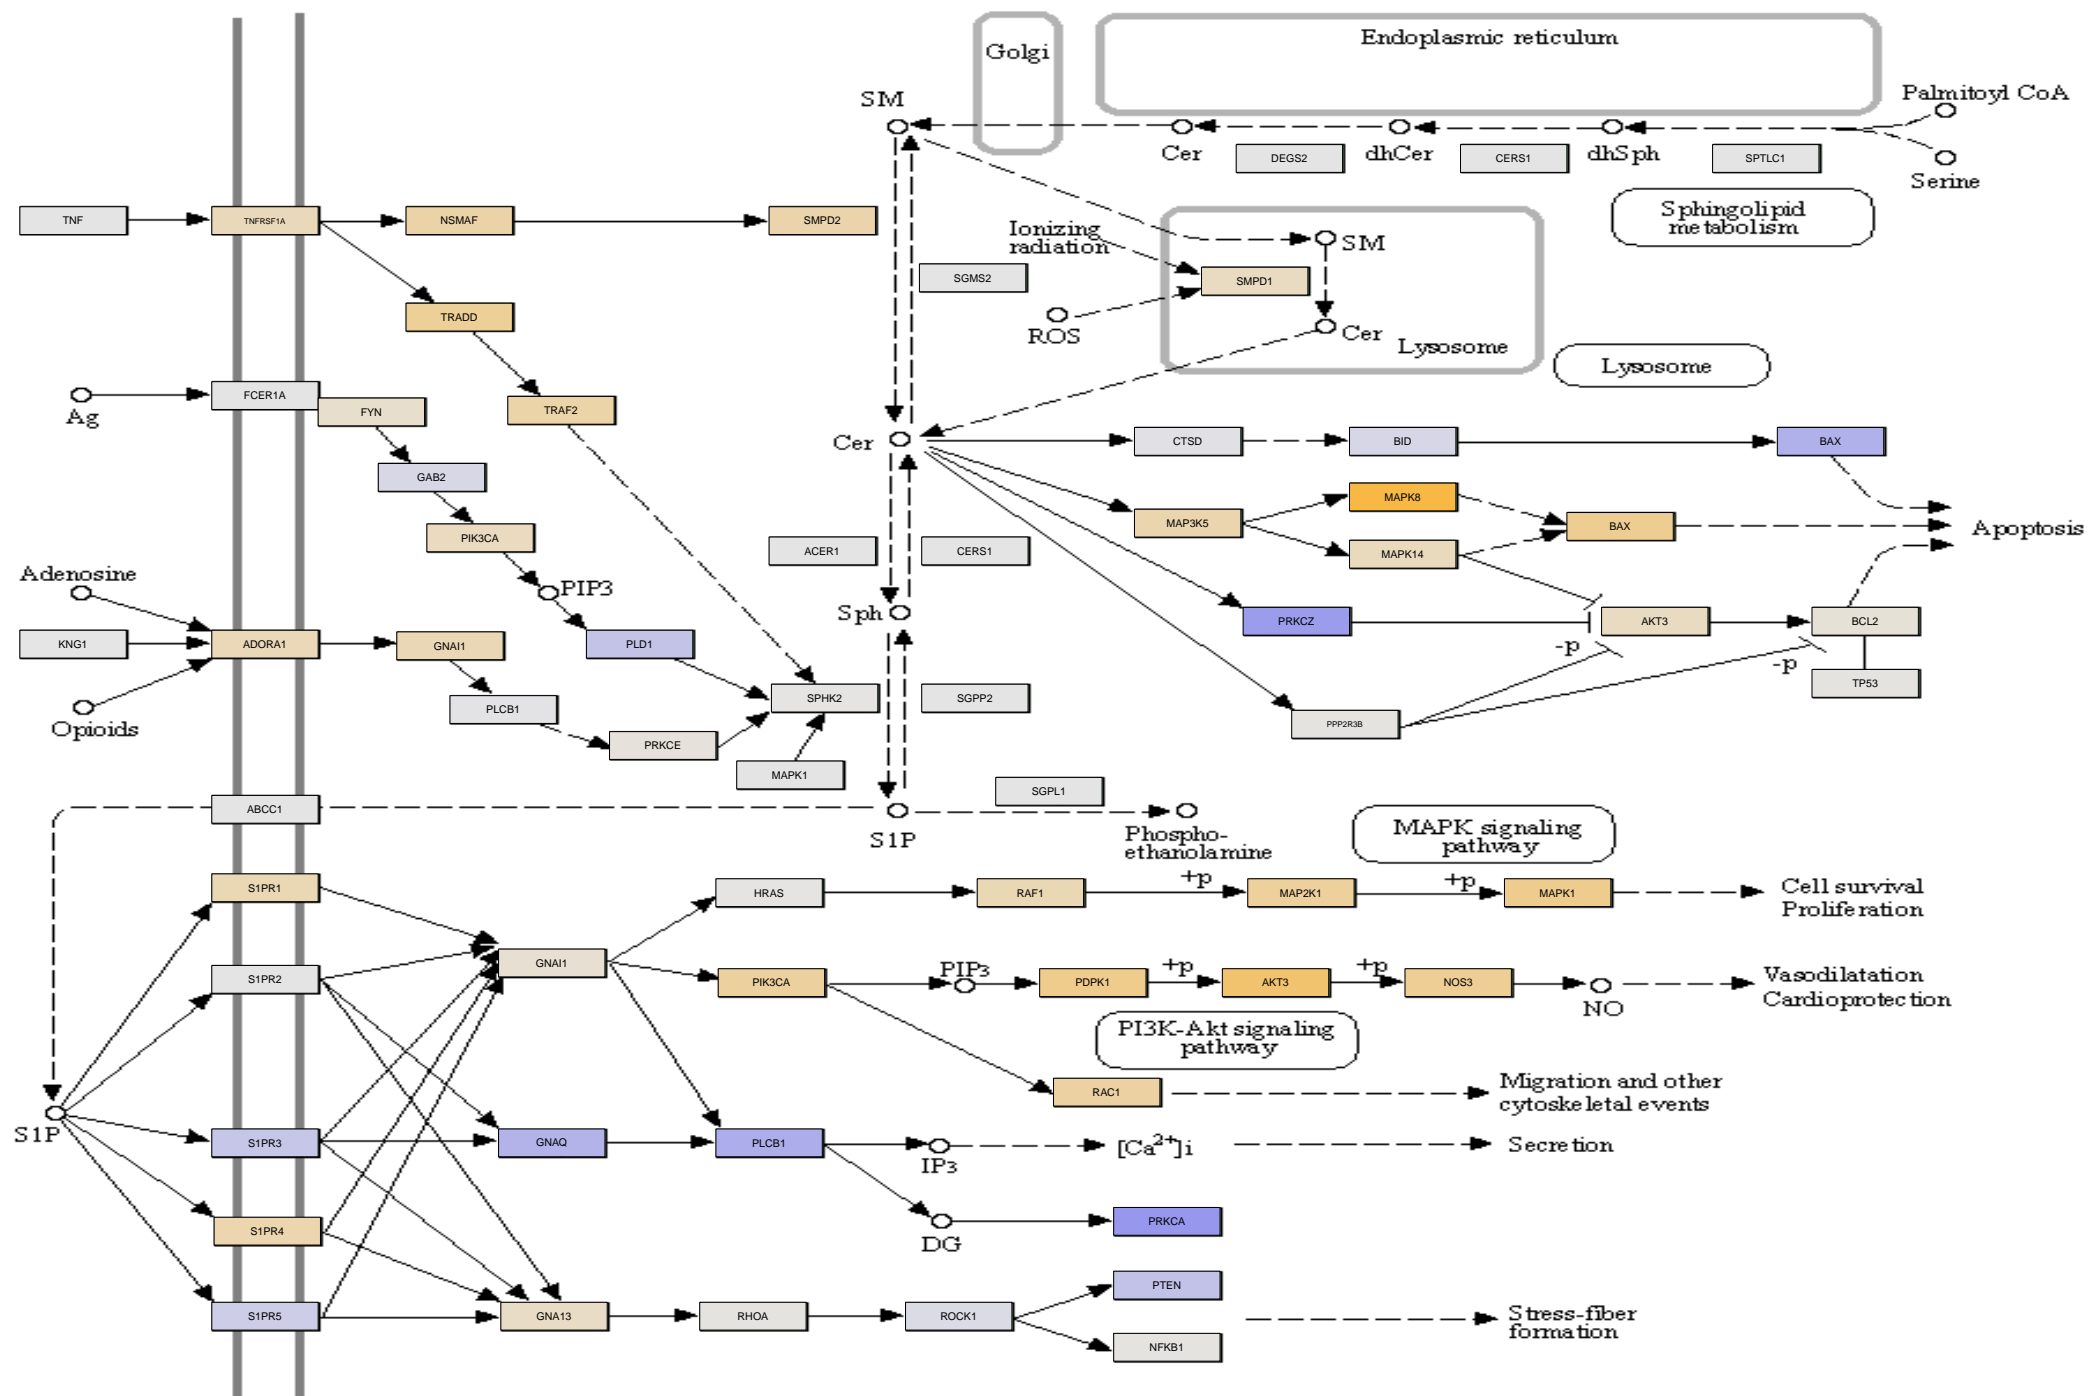

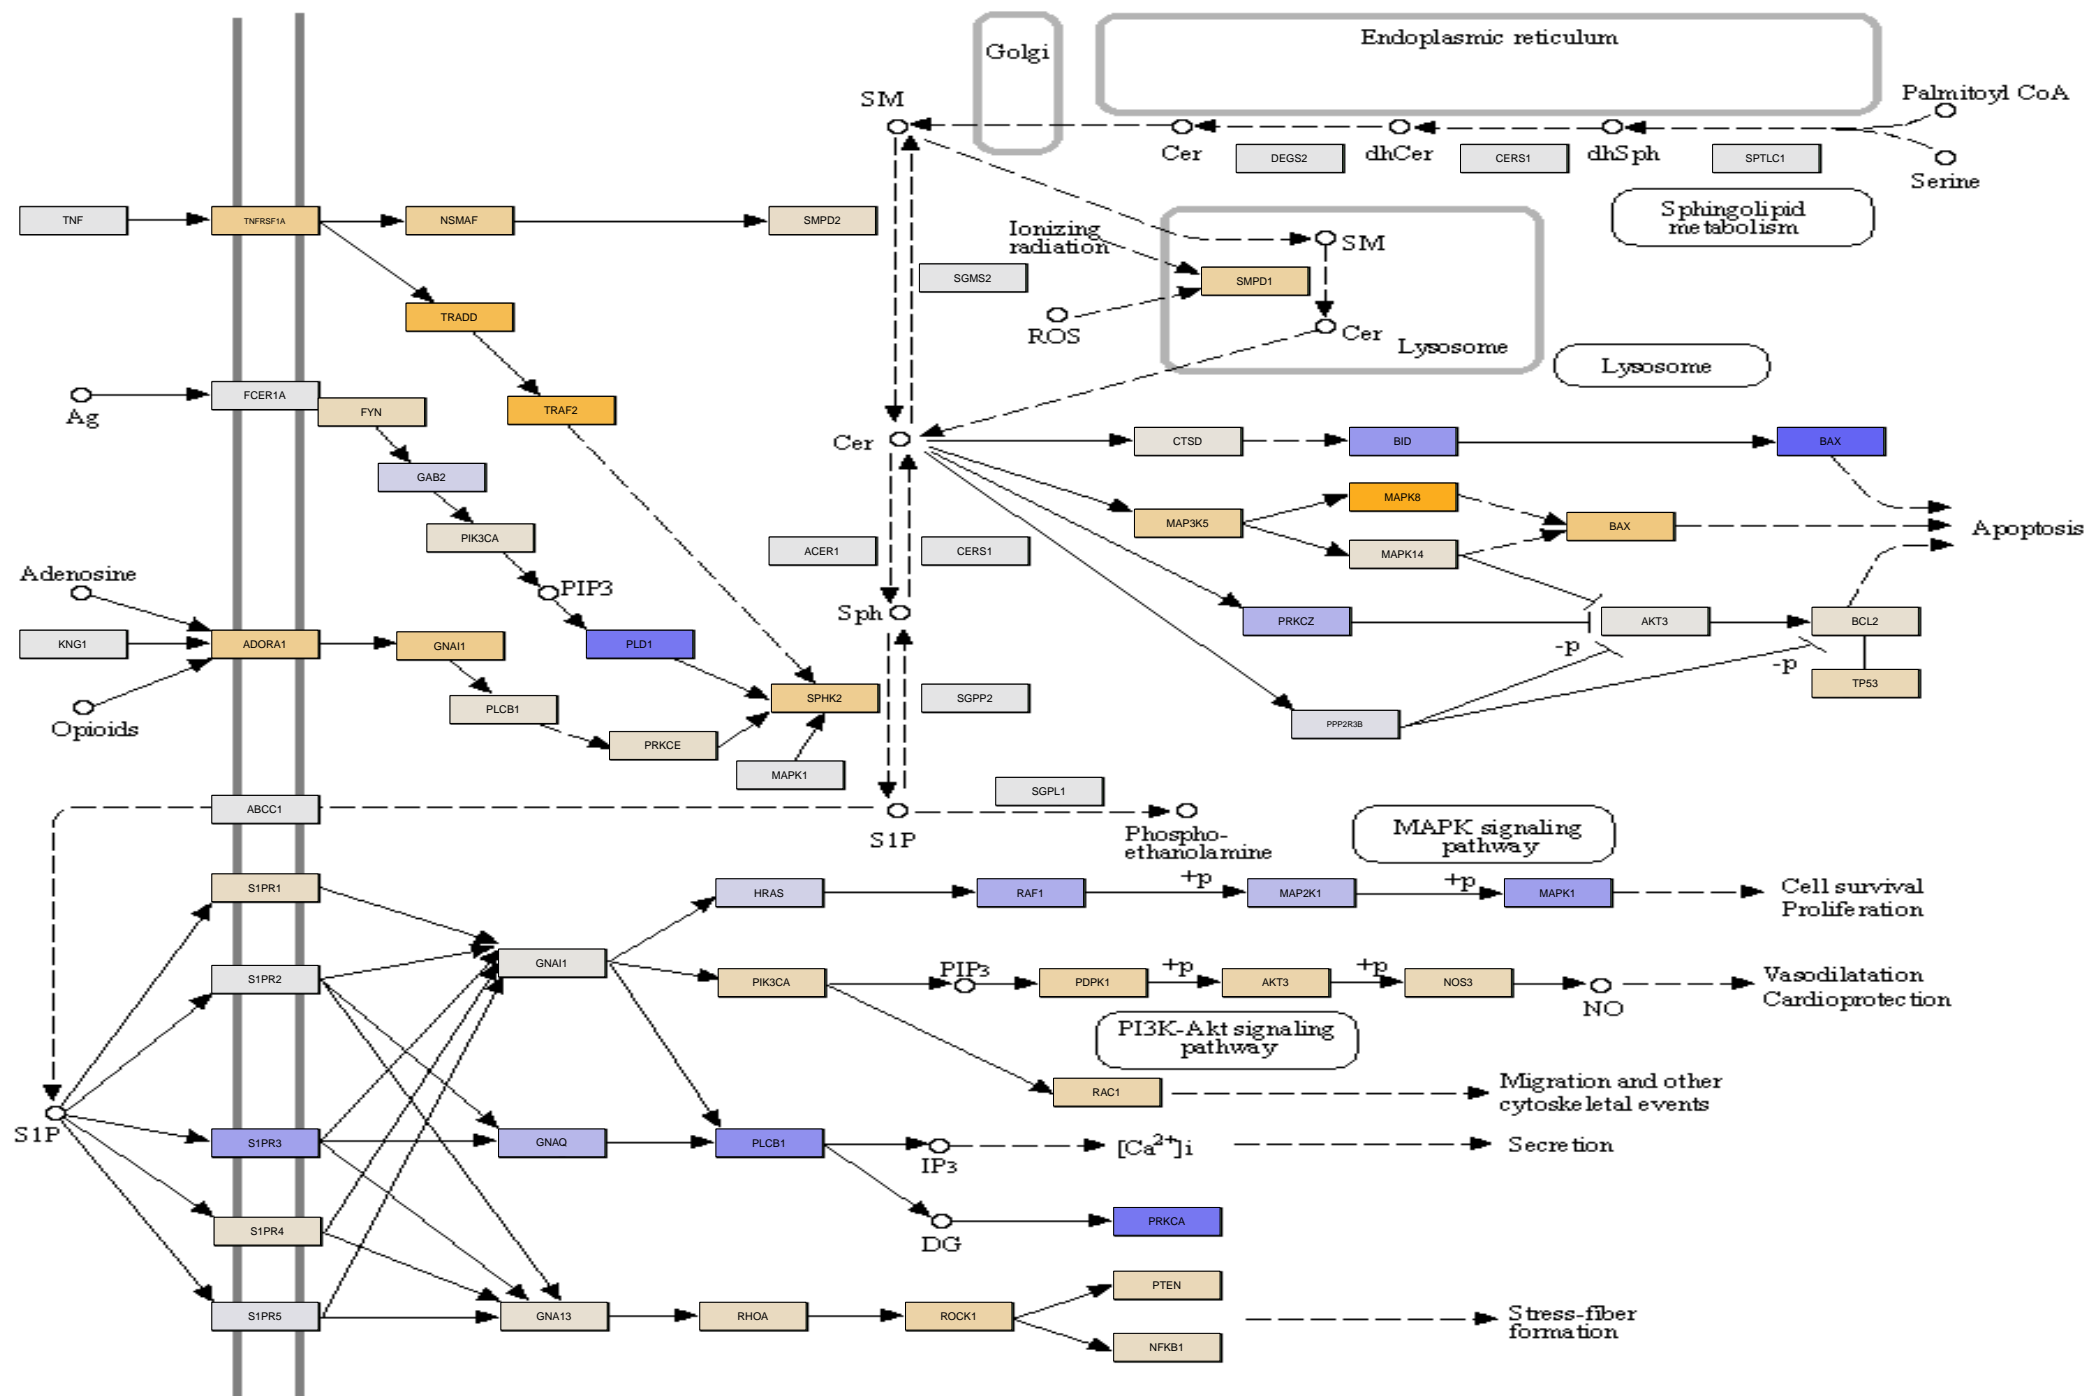

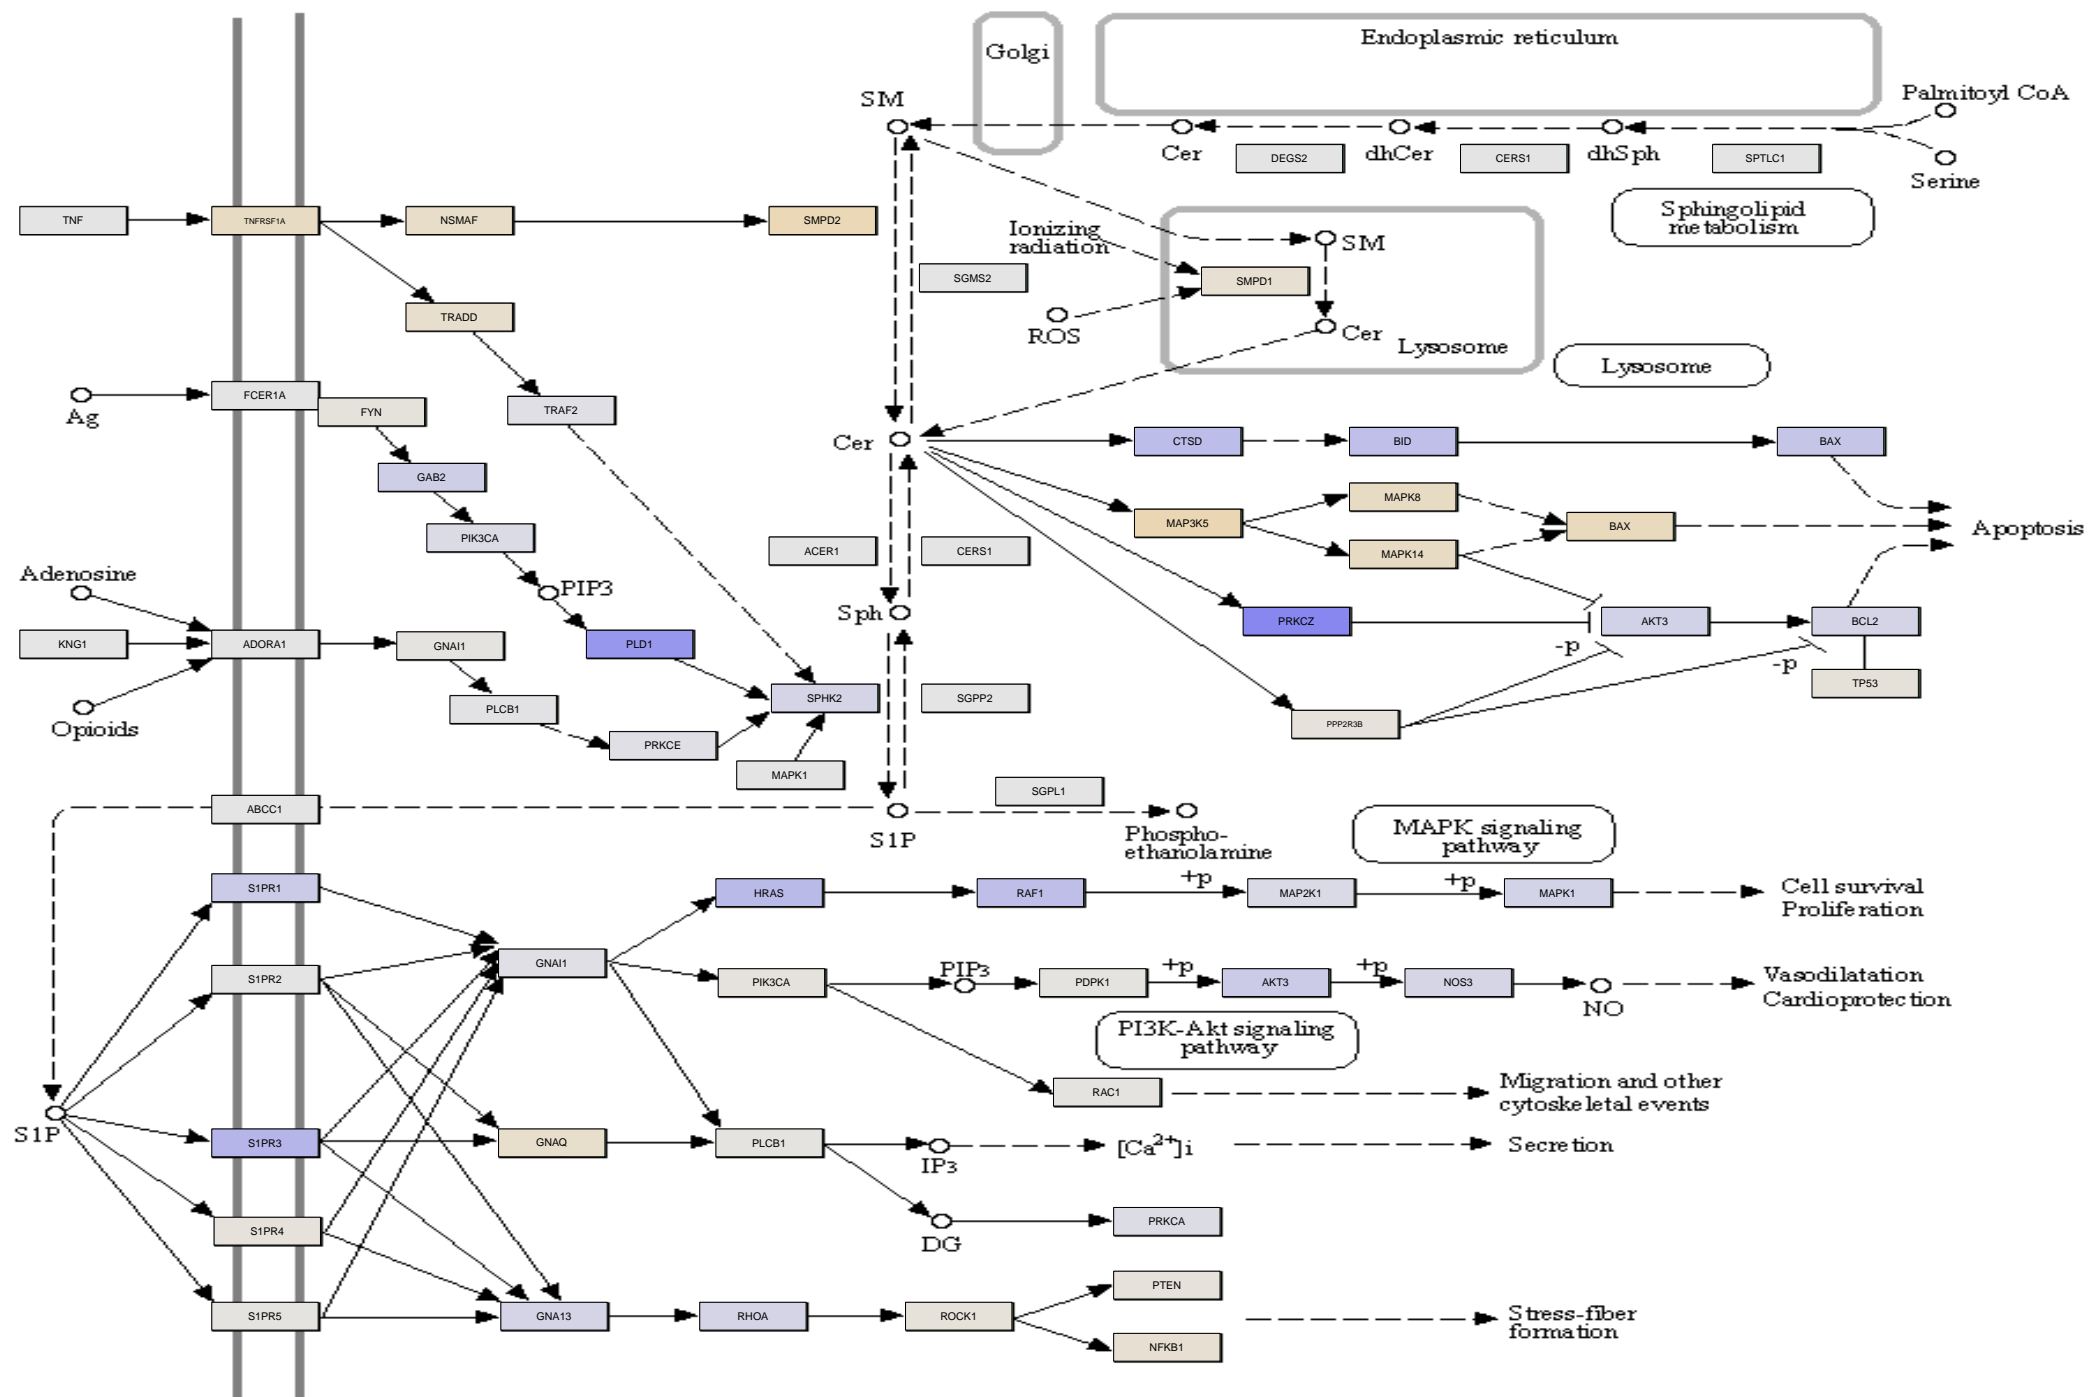

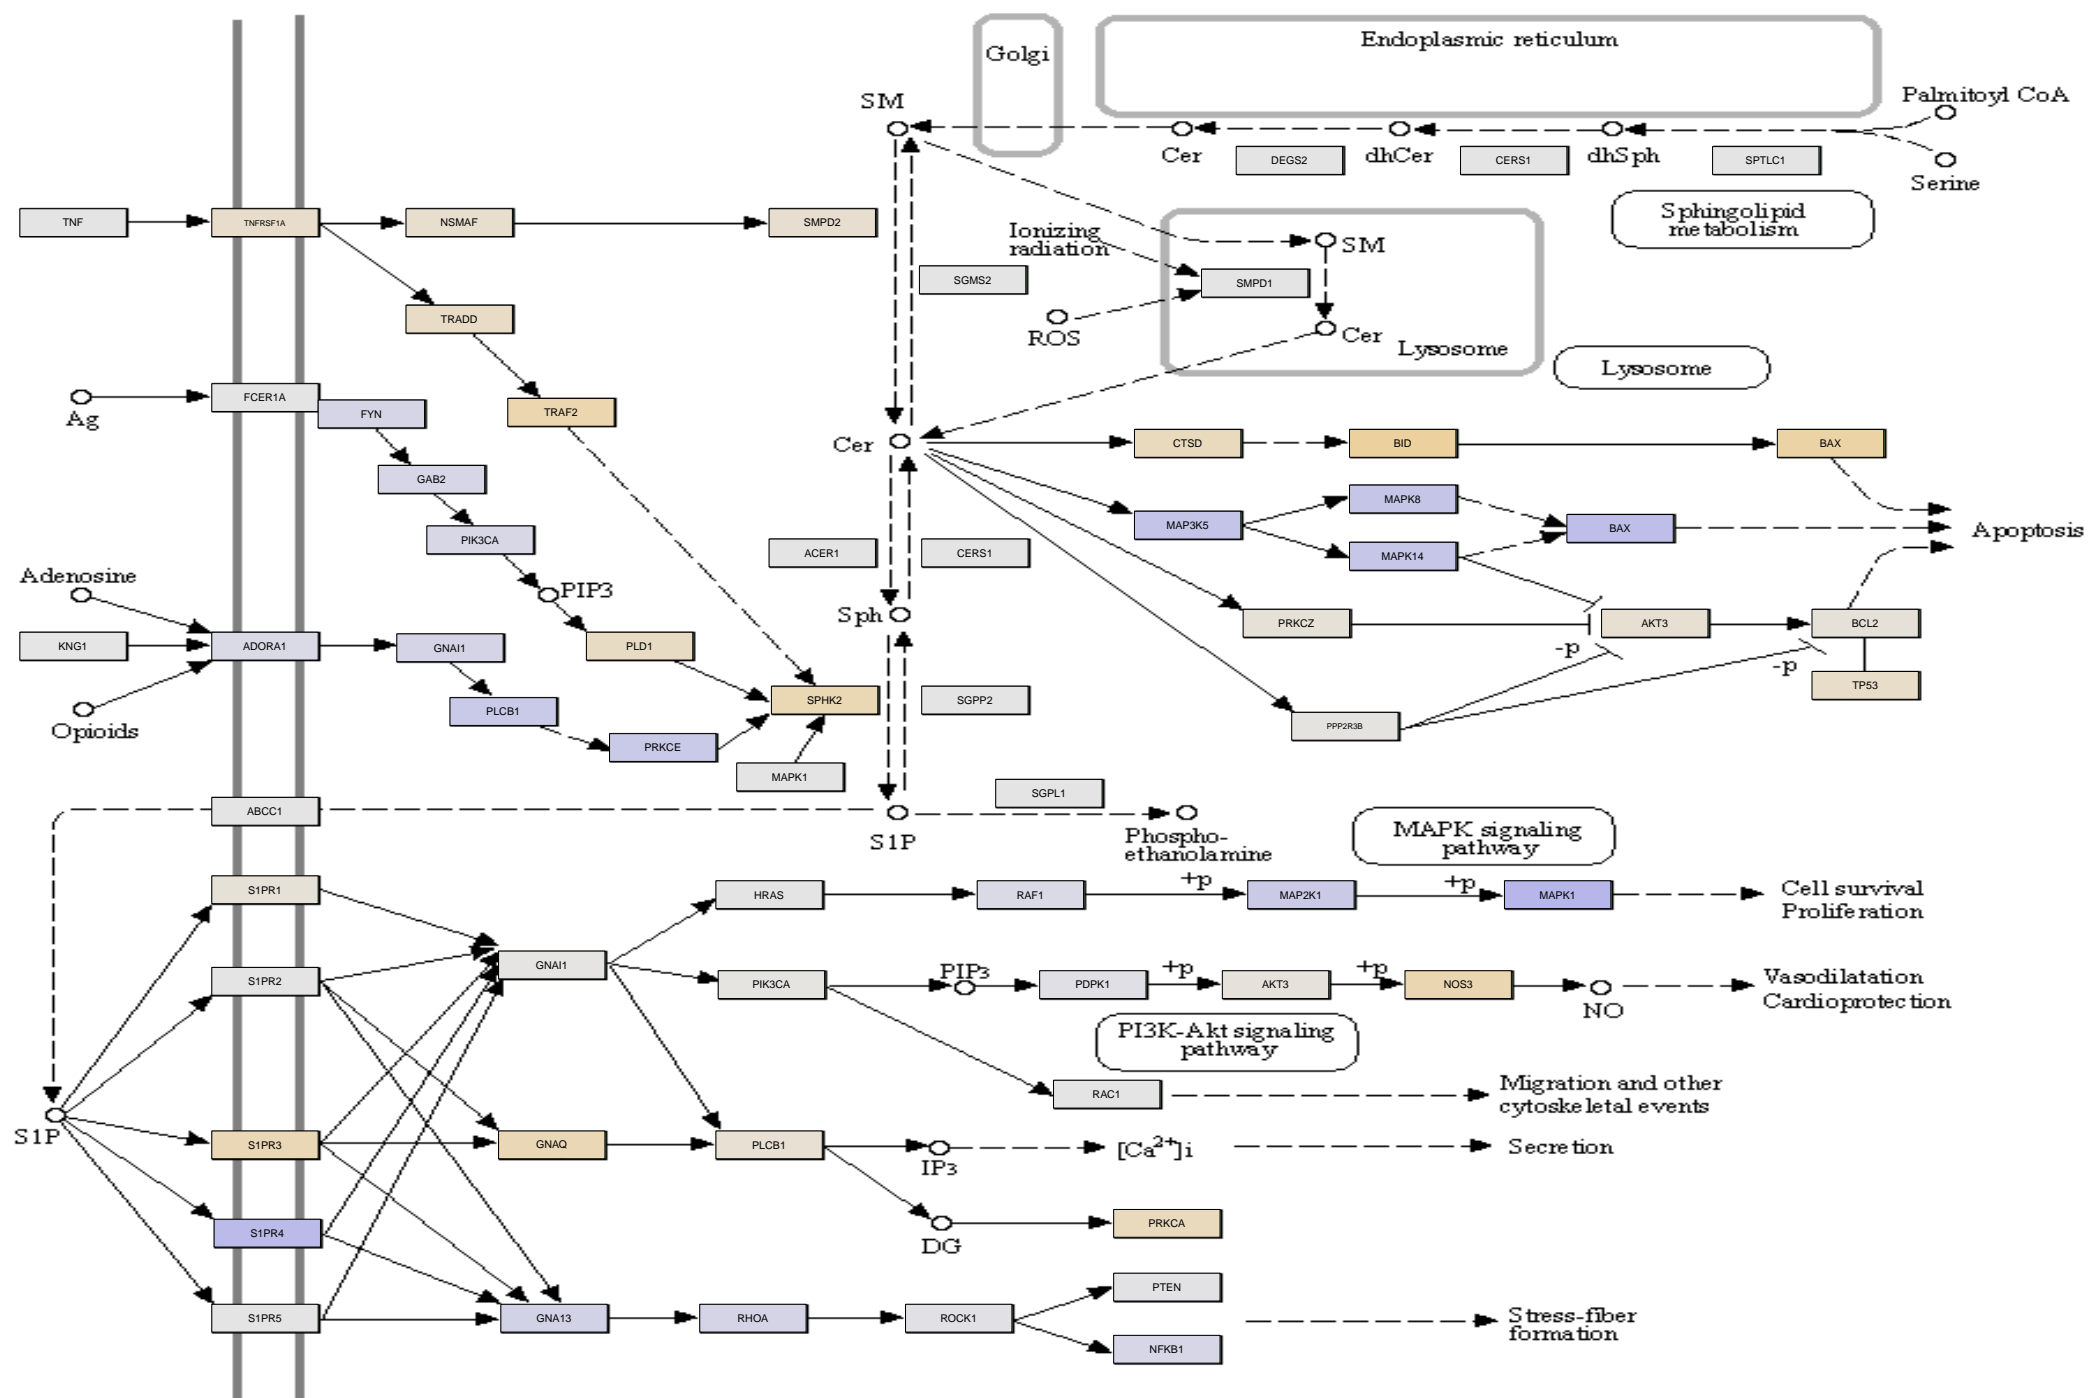



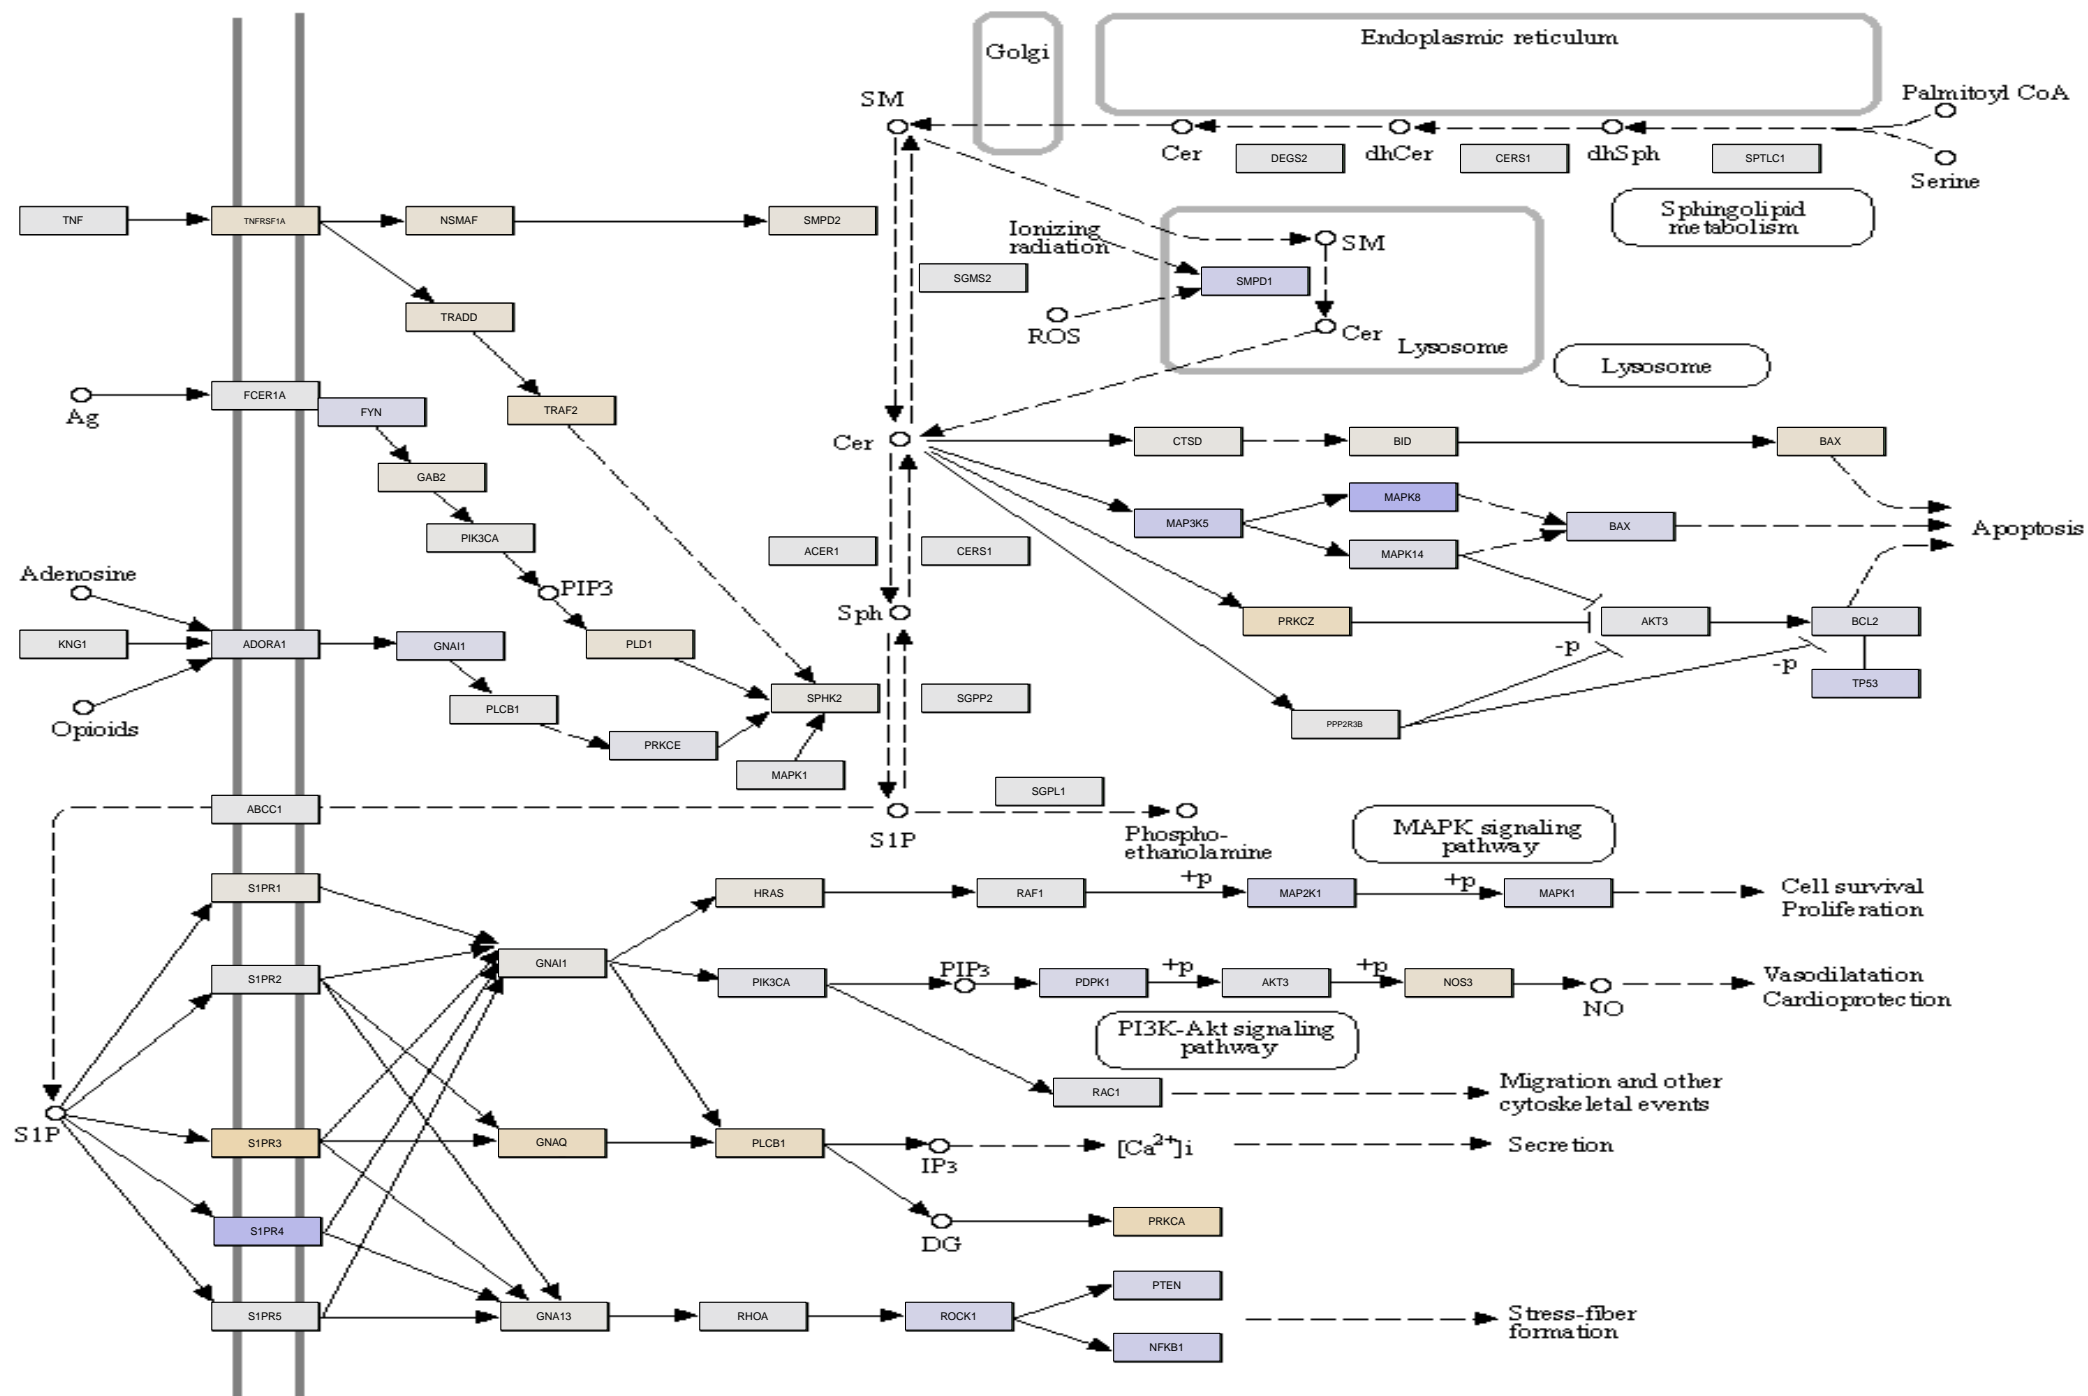

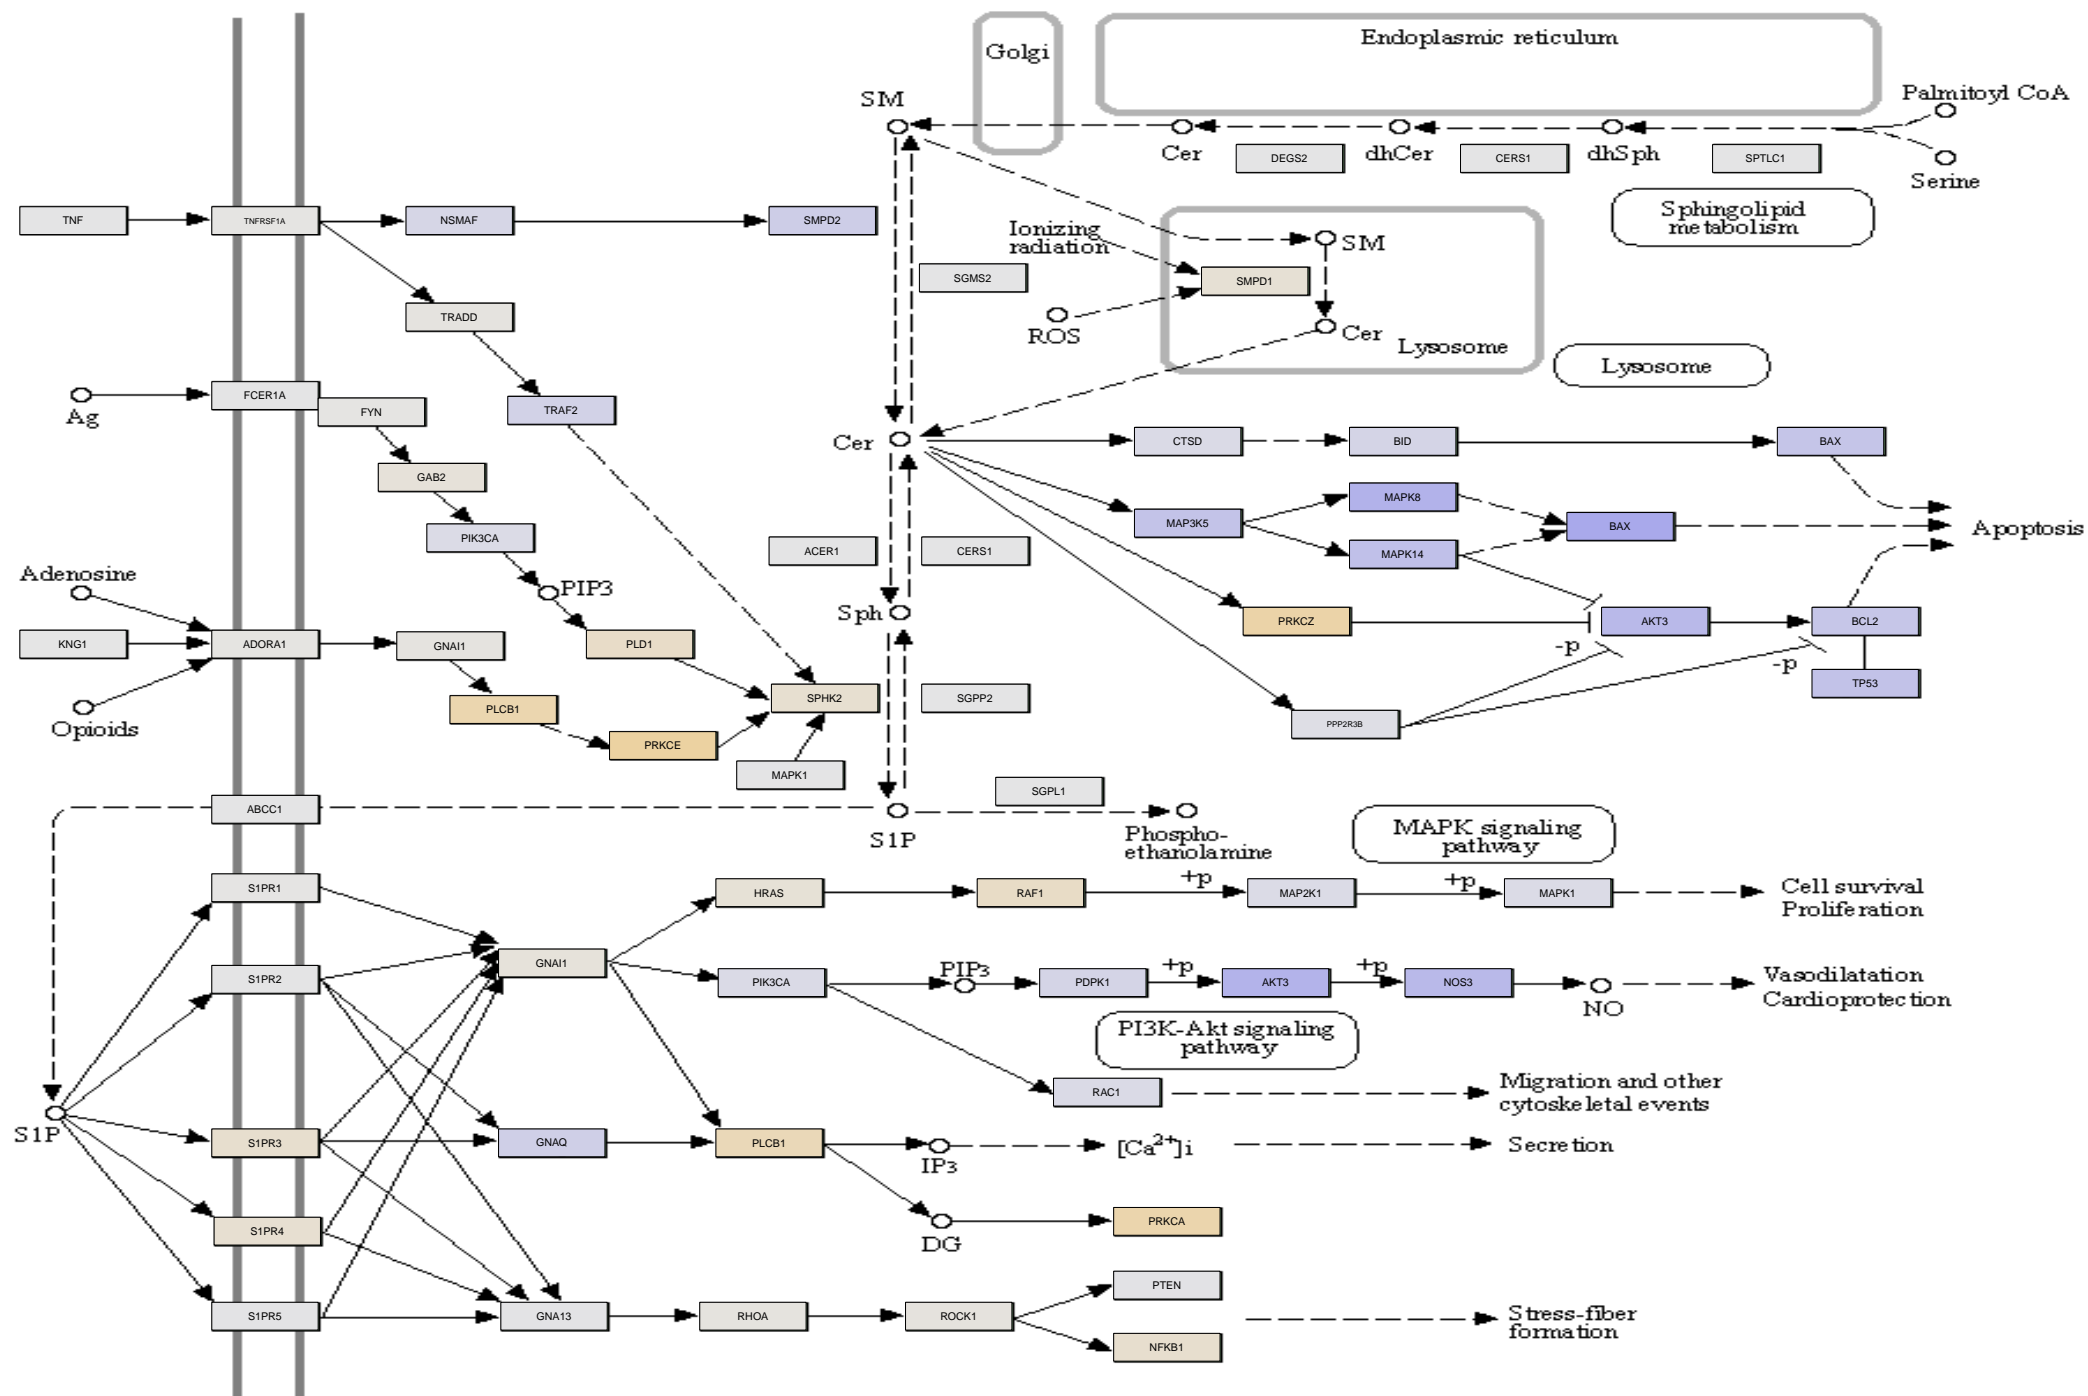

Supplement: s1 [file s1]
